# Supplementary material for: Combined Effects of Aircraft, Rail, and Road Traffic Noise on Total Noise Annoyance—A Cross-Sectional Study in Innsbruck
Source: MDPI journal article supplement (doi:10.3390/ijerph16183504), 2019-09-19
Supplement: s1 [file s1]

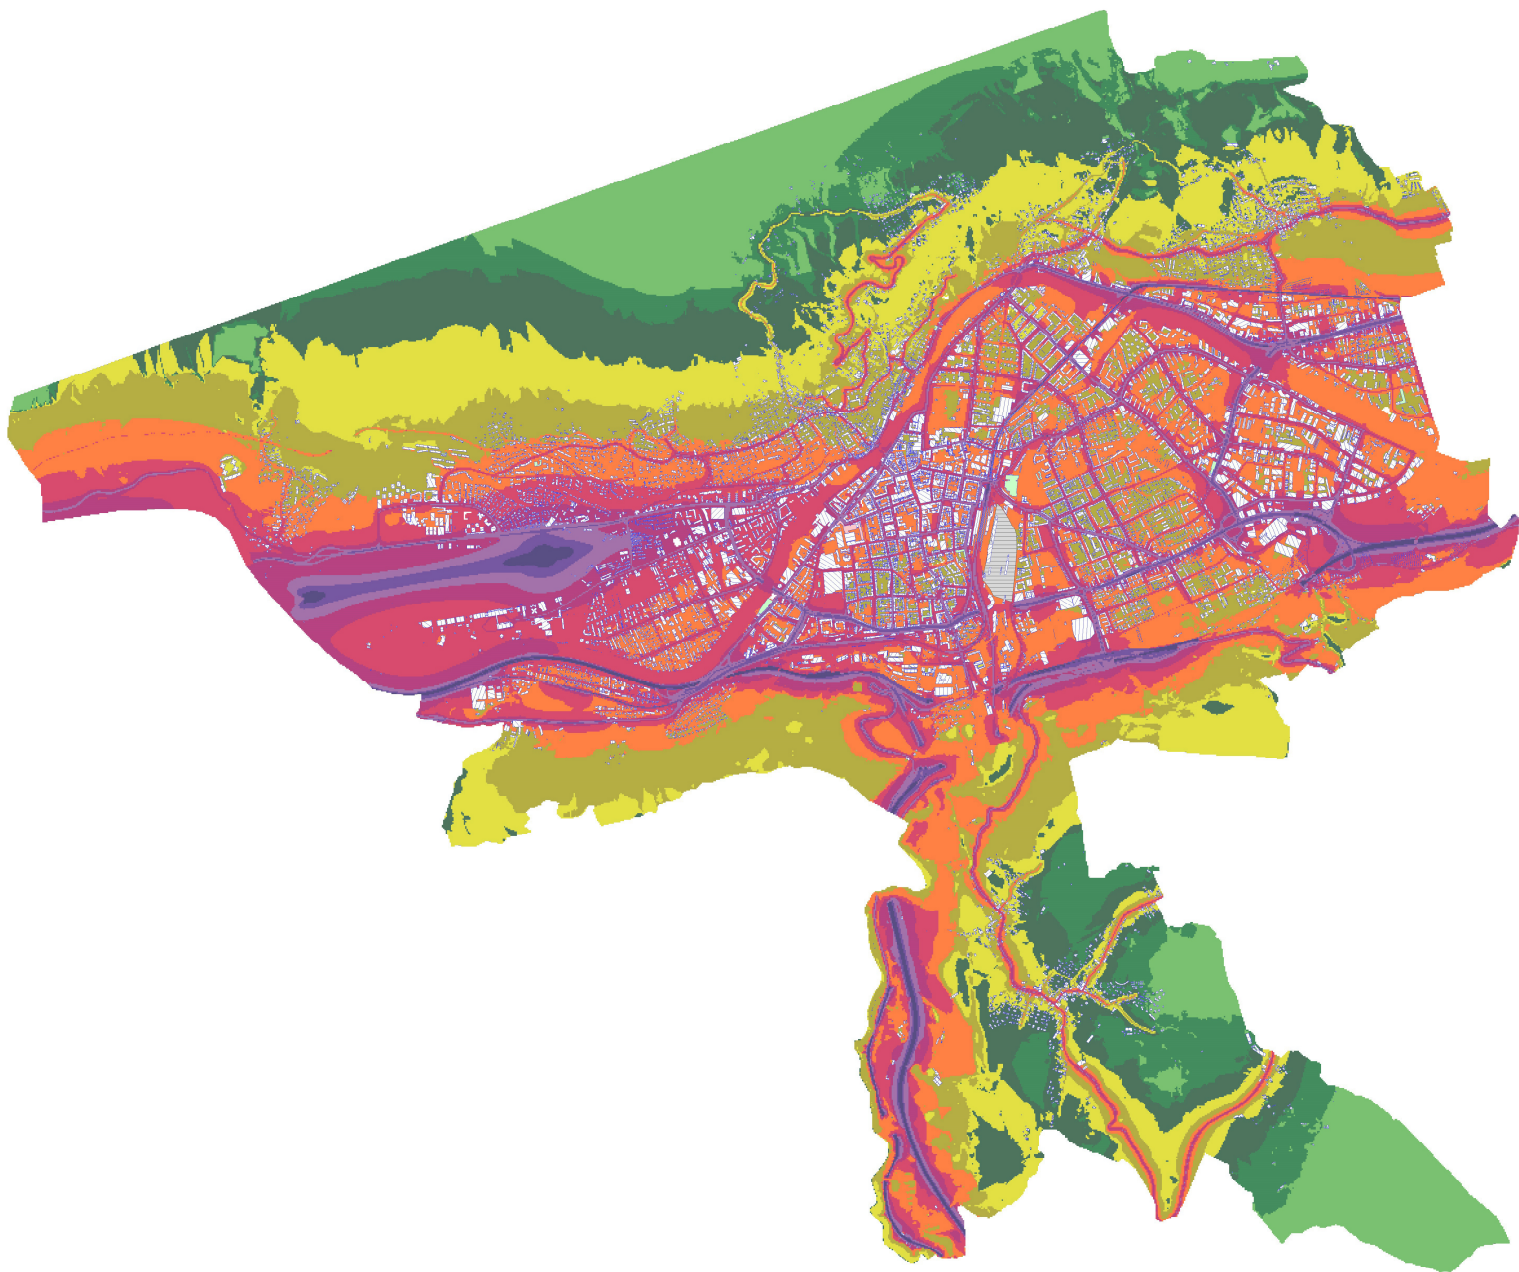

# Gesamtlärmbeurteilung Innsbruck 2017

Pilotprojekt

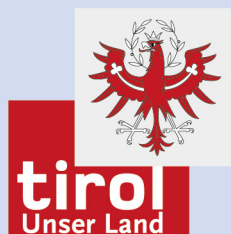

Christoph Lechner / David Schnaiter

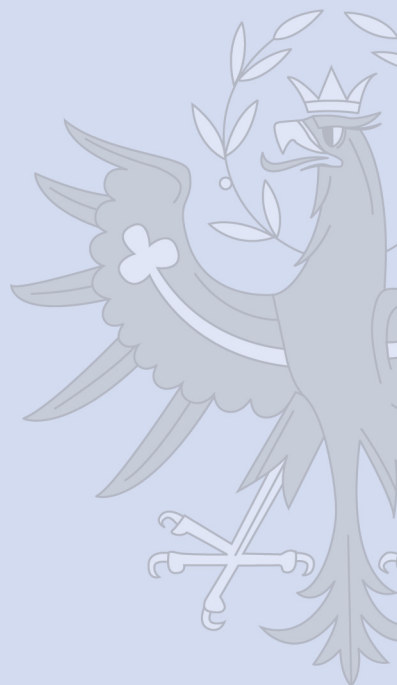





Pilotprojekt  
**GESAMTLÄRMBETRACHTUNG INNSBRUCK**  
Gesamtbericht

---

Innsbruck, März 2018

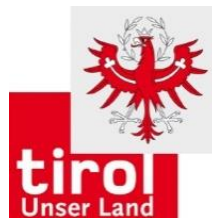

Ein Projekt des **Landes Tirol** in Zusammenarbeit mit:  
Stadt Innsbruck – Asfinag Alpenstrassen GmbH – Innsbruck Airport  
Österreichischer Arbeitsring für Lärmbekämpfung  
Österreichische Bundesbahnen

**INNS'  
BRUCK**

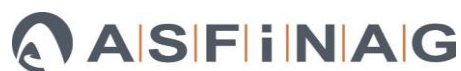

**INNS'  
BRUCK  
AIRPORT**

**ÖBB**  
INFRA

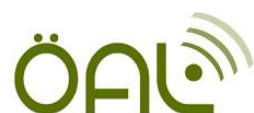

## Vorwort der Autoren

Der Durchführung des Pilotprojektes Gesamtlärbetrachtung Innsbruck ging eine umfassende Literaturrecherche voraus, welche auf die kombinierten Effekte unterschiedlicher Schallquellen, insbesondere auf Verkehrsschallquellen, fokussierte. Zudem wurden von den Autoren rezente Studien über Belästigung (und subjektive Schlafstörung) durch Lärm berücksichtigt.

Das Studiendesign für das vorliegende Pilotprojekt wurde sorgfältig, nach guter wissenschaftlicher Praxis ausgewählt. Verzerrungen (sogenannte Bias) durch ungenaue Bestimmung der Exposition (measurement bias) sollten bestmöglich vermieden werden. Daher wurde nicht wie häufig beobachtet in Expositionsgruppen (z. B. von 50 – 55 dB), sondern punktgenau mit Dezibel-Auflösung gearbeitet, dies für jede einzelne betrachtete Quelle.

Mit dem Instrument der persönlichen Interviewbefragung wurde das in der sozialempririschen Forschung absolut valideste Werkzeug gewählt. Die geschichtete Clusterauswahl, der große Stichprobenumfang (N=1031) und die ausgezeichnete erreichte Rücklaufquote (47,8%) stellen sicher, dass nur minimalste Verzerrungen durch die Auswahl der Befragten (selection bias) auftreten. Die vorliegende Studie zeigt sich in der Aneinanderreihung der Methoden auch im internationalen Vergleich in ihrer Qualität einzigartig und ist damit auch für die anschließende Forschung und Beantwortung offener Fragen bestens geeignet.

Die Autoren danken allen Projektpartnern und ihren Vertreterinnen und Vertretern, den politisch Verantwortlichen, dem Befragungsinstitut IMAD und besonders der Innsbrucker Bevölkerung, die mit ihrer Bereitschaft zur Teilnahme zum Erkenntnisgewinn und Gelingen des Projektes beigetragen hat.

Dipl.-HTL-Ing. Mag. Christoph Lechner und Mag. Dr. David Schnaiter

Innsbruck, März 2018

# Zentrale Inhalte und Ergebnisse

## 1. Einleitungsteil

Im **Einleitungsteil** dieses Gesamtberichts werden die Projektpartner (S. [34](#)) vorgestellt und ein Überblick über die (sozio-)demographische Ausgangslage (S. [36](#)) der Stadt Innsbruck mit ihren 9 Katastralgemeinden (S. [35](#)) präsentiert.

## 2. Lärmdaten

Der zweite Teil **Lärmdaten** (S. [38](#)) umfasst Erläuterungen zu den Grundbegriffen der methodischen Herangehensweise an die Lärmausbreitungsberechnungen (S. [38](#)), sowie detaillierte Informationen zu den verwendeten Datengrundlagen (S. [40](#)) und zum angewandten Verfahren einer Gesamtlärmbeurteilung (S. [47](#) und S. [66](#)). Auch auf die Unterschiede zwischen Messung und Berechnung von Lärmdaten wird eingegangen (S. [40](#) und [45](#)).

## 3. Lärm in Innsbruck

Die Beschreibung der Ist-Situation der Verkehrslärmbelastung in Innsbruck findet sich im dritten Teil **Lärm in Innsbruck** (S. [48](#)):

### 3.1. Belastungszonen

- Der Straßenverkehr verursacht den mit Abstand größten Anteil an stark lärmbelasteten Wohnungen und Gebäuden in Innsbruck. **52% der Gebäude und 63% der Wohnungen in Innsbruck sind durch den 24h-Straßenverkehrslärm  $L_{den}$  stark belastet**, vergleichsweise sind hier der Fluglärm mit 7% und der Schienenverkehrslärm mit 11% Anteil *stark belasteter* Gebäude und Wohnungen nur in wesentlich untergeordnetem Ausmaß beteiligt. Autobahn- und Fluglärm zeigen ein sehr ähnliches Bild was die Belastung betrifft (S. [48](#)).
- Die Verkehrslärmbelastungen werden zunächst als **Rasterlärmkarten  $L_{den}$**  getrennt nach Quellen unter Berücksichtigung der drei Belastungskategorien „*gering (<45dB)*“, „*mittel (45-55dB)*“ und „*stark (>55dB)*“ einzeln dargestellt:
  - **Fluglärm:** Während sich der Bereich der starken Belastung auf das unmittelbare Flughafenumfeld beschränkt, erstreckt sich das Gebiet der mittleren Belastung in West-Ostrichtung über einen weiten Bereich des Stadtgebietes (S. [50](#)).
  - **Schienenverkehrslärm:** Der Schienenkorridor von Ost nach West im Inntal mit der Abzweigung der Brennerbahn in Richtung Süden bildet sich in den Lärmeinträgen deutlich ab. Entlang dieses Korridors ergibt sich eine starke Belastung, der Abzweig der Karwendelbahn in Richtung Nordwest ist noch erkennbar, die Straßenbahn tritt kaum in Erscheinung (S. [51](#)).

- **Straßenverkehrslärm:** Der Straßenverkehrslärm belastet Innsbruck sehr großräumig. Ausgenommen sind lediglich die südlichen Randgemeinden Igls und Vill, wie auch Teile von Mühlau und Arzl. Die Katastralgemeinden im Stadtkern weisen ein durchgehend hohes Belastungsbild auf. Die im Süden Innsbrucks vorbeiführende Autobahn A12, sowie auch der Abzweig der Brennerautobahn A13 belasten vor allem die Stadtteile Amras, Pradl und Wilten, ebenso wie einen Teil von Hötting. Lärm von der Brennerautobahn wirkt sich vor allem auf unbesiedeltes Gebiet in der Katastralgemeinde Vill aus (S. 52).

### 3.2. Verkehrslärmbelastung

- Die **Straßenverkehrslärmbelastung**, welche im Mittel mit rund **55dB Dauerschallbelastung** ( $L_{den}$ ) auf die Gesamtinnsbrucker Wohngebiete einwirkt, ist die dominierende Lärmquelle in Innsbruck. Mit deutlichem Abstand (mehr als 10dB und damit in ihrer Lautheit rund halb so laut) folgen die weiteren Verkehrslärmquellen **Flug-, Schienenverkehrs- und Autobahnlärm**, die in ihrem mittleren Immissionspegeln **zwischen 44 und 44,6dB  $L_{den}$**  fast gleichauf liegen (S. 54).
- Während über die Hälfte der Innsbruckerinnen und Innsbrucker vom Flug-, Schienen- und Autobahnlärm nur gering (<45dB) belastet sind, fallen **über 90%** der Einwohnerinnen und Einwohner beim **Straßenverkehrslärm** in die Kategorien der **mittelgradig bzw. stark Belasteten** (S. 55).
- Der **Straßenverkehrslärm** ist besonders in den Katastralgemeinden **Wilten, Innsbruck, Pradl und Amras** sehr ausgeprägt und liegt in diesen Stadtteilen über dem Schwellenwert von 55dB Dauerschallbelastung. Der **Fluglärm** belastet besonders **Hötting** und reicht dort im Mittel knapp an die 50dB-Schwelle. Der **Schienenverkehrslärm** sticht in den Katastralgemeinden **Innsbruck, Mühlau und Wilten** hervor, wo ebenfalls knapp eine 50dB-Dauerbelastung der Wohngebäude erreicht wird. **Igls und Vill sind die ruhigsten Katastralgemeinden** der Stadt Innsbruck (S. 55).
- Über 80% aller Adresspunkte in **Wilten** sind stark vom **Straßenverkehrslärm** belastet, in den Katastralgemeinden **Innsbruck, Pradl und Amras** sind es über 60%, in Igls und Vill hingegen nur 14%. Vom **Fluglärm** starkbelastete Wohngebäude sind ausschließlich in **Hötting** vorhanden (20,2% aller bewohnten Adresspunkte). Der **Schienenverkehrslärm** belastet in **Innsbruck und Wilten** rund ein Viertel aller Gebäude stark. Die **Autobahn** wirkt sich vor allem in **Wilten** (24%) und **Amras** (17,3%) stark lärmbelastend aus (S. 57).
- Die Lärmbelastung nach Quelle verändert sich im **Nachtzeitraum** (22h bis 6h) deutlich. Der **Straßenverkehrslärm** bleibt die mit Abstand **dominierende Lärmquelle**, nimmt aber im Vergleich zu den 24h-Pegeln um rund 10dB ab und ist damit **in seiner Lautheit halbiert**. Gleiches gilt für den Autobahnlärm. Der Schienenverkehrslärm verringert sich im Nachtzeitraum im Mittel um rund 7dB. Am stärksten nimmt in den Nachtstunden die Verkehrslärmbelastung durch den **Flugverkehr** ab. Diese **verringert sich um knapp 18dB** gegenüber dem 24h-Pegel und trägt damit im Vergleich der einzelnen Verkehrslärmquellen mit Abstand am wenigsten zur Gesamtlärmbelastung Innsbrucks in der Nacht bei (S. 59).
- **Über 50%** der Innsbruckerinnen und Innsbrucker sind **auch in der Nacht mittelgradig bzw. stark vom Straßenverkehrslärm belastet**. Beim **Schienenverkehrslärm** reduziert sich der Anteil der mittelgradig bzw. stark Belasteten in der Nacht auf **unter 14%**, bei den **Autobahnlärmbelasteten** auf **unter 8%**. **Stark fluglärmbelastete Adresspunkte gibt es im Nachtzeitraum in Innsbruck nicht**, deutlich weniger als 1% sind als mittelgradig belastet einzustufen (S. 61).

- Die **nächtliche Straßenverkehrslärmbelastung** liegt im Mittelwert aller bewohnten Innsbrucker Adresspunkte **in Wilten am höchsten** und dort auch über dem Schwellenwert von 50dB. Der **Flugverkehrslärm** in der Nacht sinkt auch in der im 24h-Zeitraum am stärksten belasteten Katastralgemeinde Hötting **unter die 30dB-Pegelgrenze**. **Igls und Vill** sind auch **im Nachtzeitraum** – sowohl nach einzelnen Verkehrsträgern, als auch insgesamt – **die ruhigsten Katastralgemeinden** der Stadt Innsbruck (S. [61](#)).
- Die **Katastralgemeinde Innsbruck** weist den höchsten Anteil an stark vom Straßenverkehrslärm in der Nacht belasteten Wohngebäuden auf (Schallpegel  $L_n > 55\text{dB}$ ). Auch in **Wilten** ist eine erhebliche Anzahl von Adresspunkten (238 Wohngebäude entspricht 19%) in der Nacht starken Lärmpegeln aus dem **Straßenverkehr** ausgesetzt. Weiters sind Innsbruck und Wilten zum Teil (rund 7%) in der Nacht stark **schienenverkehrslärmbelastet**. Stark vom **Autobahnlärm** in der Nacht belastete Wohngebäude treten **nur vereinzelt** auf in Amras (9 Wohngebäude), Wilten (4 Wohngebäude) und Pradl (1 Wohngebäude) auf. Stark vom Flugverkehrslärm belastete Gebäude gibt es im Nachtzeitraum in ganz Innsbruck nicht. In Igls ist unabhängig von der Lärmquelle kein einziger Adresspunkt von Nachtlärmpegeln über 55dB betroffen (S. [63](#)).

### 3.3. Gesamtlärmbetrachtung Innsbruck

- Die gemeinsame Darstellung von Schallimmissionen aus unterschiedlichen Schallquellen wird zunächst erläutert und für die einzelnen Verkehrslärmquellen in Form von **wirkungs- und effektbezogenen Rasterlärmkarten** dargestellt:
  - **Autobahnlärm** (S. [67](#))
  - **Straßenverkehrslärm** (S. [68](#))
  - **Fluglärm** (S. [70](#) und [71](#))
  - **Schienenverkehrslärm** (S. [72](#) und [73](#))

Die **Belastungszonen beim Fluglärm weiten sich** in der Darstellung der effektbezogener Substitutionspegel deutlich **aus** und die Katastralgemeinden Innsbruck, aber auch Reichenau und Pradl zeigen sich deutlicher betroffen. Im Gegensatz dazu werden die Belastungszonen ausgedrückt als effektbezogener Substitutionspegel **beim Schienenverkehr deutlich kleiner**, die Dominanz in einigen Bereichen geht daher deutlich zurück.

- Aus den drei Einzelkarten für Straßen-, Flug- und Schienenverkehr wird durch Pegeladdition das Herzstück – die **Gesamtlärmbelastung Innsbrucks** ermittelt und dargestellt (S. [75](#)).
- Über **Hotspotanalysen** können **Priorisierungsmöglichkeiten für Maßnahmen** visualisiert werden, indem Bereiche, in denen vergleichsweise viele Menschen vergleichsweise hohen Gesamtlärmpegeln ausgesetzt sind, dargestellt werden. Daher wurde für jede Verkehrsquelle an jedem Gebäude in Innsbruck die nach **Exposition-Wirkung-Beziehungen** ermittelte Wahrscheinlichkeit einer Belästigung berechnet, zu einem **Gesamteinwirkungsindex** der unterschiedlichen Lärmquellen zusammengeführt und mittels Rasterzellen die Verteilungssituation dargestellt (S. [76](#)).

**4 besondere Hotspots** zeichnen sich ab:

- **Bereich Haydnplatz** (Katastralgemeinde Innsbruck): Hier ist nicht die Lärmbelastung allein ausschlaggebend, sondern auch die hohe Dichte der Bewohnerinnen und Bewohner.



- **Bereich General-Eccher-Straße** (Pradl): Kumulierender Effekt durch Überlagerung von Schienen- und Straßenverkehrslärm (Westbahn und B 171) in Kombination mit der hohen Anzahl der Hauptwohnsitzgemeldeten.
- **Bereich Dr.-Ferdinand-Kogler-Straße** (Amras): Sich überlagernde Belastungen durch den Erschließungsverkehr des Einkaufszentrums und der Autobahnzubringer, ebenso wie durch die mehrseitigen Belastungen durch das Gemeindestraßennetz.
- **Bereich Kranebitter Allee** (Hötting): Kumulierung der verschiedenen Geräuschquellen - besonders der B 171 und der Schallimmissionen des Flugverkehrs – in seinem Ausmaß ist dieser Hotspot doppelt so groß wie die drei anderen.
- Zur Auffindung **schützenswerter, ruhiger Bereiche** im Stadtgebiet von Innsbruck mit einem effektbezogener Substitutionspegel  $L_{A,ES} < 55\text{dB}$  wurde eine detaillierte **Summenlärmkarte** erstellt, die neben Parks und Grünflächen und den vielen ruhigen Gebieten außerhalb der Kernbebauung vor allem die **wertvollen kleinräumigen Strukturen** in Innsbruck aufzeigt. Dabei fällt die klassische **Blockrandbebauung** einzelner Stadtteile Innsbrucks (etwa im Saggen und in Pradl) auf, die als **beruhigte Lärmoasen** eine sehr hohe Bedeutung für die Belästigungsreaktion haben. Insgesamt gibt es vor allem **im innerstädtischen Bereich** jedoch **nur sehr wenige ruhigere Bereiche** und **im Westen Innsbrucks** bestehen **durch die Fluglärmwirkung keine lärmberuhigten Innenhofsituationen** mehr (S. [78](#)).

## 4. Durchführungsparameter der Befragungen

Der Berichtsteil **Durchführungsparameter der Befragungen** leitet von den Lärm- zu den Befragungsdaten über und enthält detaillierte Darstellungen zum Setting und Untersuchungsumfang (S. [80](#)), zum Fragebogaufbau (S. [81](#)), zu Sampling und Stichprobe (S. [83](#)), Rücklaufquote (S. [87](#)), Befragungsdurchführung und Datenkontrolle (S. [89](#)), zum Datenschutz (S. [90](#)) und zu den angewandten statistischen Methoden (S. [91](#)).

- Insgesamt **1031 Personen** wurden im Stadtgebiet von Innsbruck mittels einer repräsentativen Vorortbefragung durch geschulte Interviewerinnen und Interviewer befragt.
- Die erreichte **Rücklaufquote von 47,8%** (S. [88](#)) gewährleistet eine sehr hohe Repräsentativität der Ergebnisse, minimiert systemimmanente Bias (Selbstselektion, Stichprobenfehler, mangelnde Repräsentativität usw.) und ist für eine Vor-Ort-Befragung in einem urbanen Raum als **außergewöhnlich hoch** einzustufen.
- Ein geschichtetes Adress-Cluster-Sample auf Basis der Daten des *Zentralen Melderegisters* nach Lärmkorridoren (Belastungsgruppen) unter Einbeziehung der einzelnen Verkehrsträger (S. [86](#)), der demographischen Parameter (S. [83](#)) und nach Katastralgemeinden (S. [84](#)) wurde gezogen.
- Alle bewohnten Adresspunkte im Stadtgebiet von Innsbruck wurden mit **punktgenauen Fassadenlärmpegeln** für den Tag- und den Nachtzeitraum aus dem entwickelten Gesamtlärmmodell (Bezugsjahr 2015) für sämtliche Verkehrsträger verschnitten.

## 5. Auswertung der Befragungen

Die **Auswertungen der Befragungen** werden ab S. [53](#) dargestellt und umfassen die abgefragten Themenbereiche Demographie (S. [93](#)), Wohnen (S. [98](#)), Mobilität (S. [103](#)), Lebensbedingungen in Innsbruck (S. [113](#)), Zufriedenheit mit der eigenen Wohnsituation (S. [134](#)), Gesundheitszustand (S. [145](#)), Lebensqualität (S. [150](#)), Lärmempfindlichkeit (S. [156](#)), Wind- und Wettereinflüsse auf die Lärmbelastung (S. [163](#)), Nachtschlaf bei geöffnetem Fenster (S. [166](#)), Lärmexpositionsempfinden (S. [170](#)), Belästigung / Störung durch Lärm (S. [204](#)), Belästigung / Störung durch Lärm im Schlaf (S. [245](#)), Lärmcoping (S. [287](#)), Empfundene Zu- oder Abnahme des Lärms in Innsbruck (S. [298](#)), Einschätzung der Auswirkungen von Lärm auf die Gesundheit (S. [302](#)), Bekanntheit der Umgebungslärmkarten (S. [305](#)), Einschätzung des Lärmniveaus im Städtevergleich (S. [306](#)), Einschätzung des eigenen Lärmbeitrags (S. [310](#)), Einschätzung der störendsten Lärmquelle in Innsbruck (S. [313](#)) und Sinnhaftigkeit von Maßnahmen zur Lärmreduktion in Innsbruck (S. [319](#)).

### 5.1. Mobilität

- **Nur 9%** aller Befragten **pendeln** zur Arbeits- oder Ausbildungszwecken aus der Tiroler Landeshauptstadt in andere Umlandgemeinden (S. [103](#)), bezogen allein auf die berufstätigen bzw. sich in Ausbildung befindlichen befragten Innsbruckerinnen und Innsbrucker (ohne Nichtzutreffende, die sich in Pension befinden, nicht berufstätig sind usw.) sind es 14,6%.
- **87,5%** aller Befragten **gehen regelmäßig** (mehrmals pro Woche bis fast täglich) länger als 10 Minuten **zu Fuß** (S. [110](#)), knapp **50% nutzen regelmäßig ein Auto** als Fahrerin / Fahrer (S. [104](#)), **über 45%** - über alle Altersklassen hinweg - ein **Fahrrad** (S. [109](#)) und **37,5% öffentliche Verkehrsmittel** in der Stadt (S. [106](#)).
- Die Nutzung von **öffentlichen Verkehrsmitteln** (Eisenbahn, Autobus) **außerhalb der Stadt** Innsbruck beschränkt sich bei den Befragten größtenteils auf **Gelegenheitsnutzungen**, was direkt mit dem geringen Auspendleranteil aus der Landeshauptstadt assoziiert ist (S. [107](#)).
- **Ein Drittel** aller befragten Innsbruckerinnen und Innsbrucker **nutzt mehrmals pro Jahr ein Flugzeug** (umfasst auch einen einmal im Jahr stattfindenden Urlaub, der mit dem Flugzeug als Transportmittel erreicht wird und bei dem im Regelfall zumindest zwei Flüge – ein Hin- und ein Rückflug – absolviert werden), mehr als die Hälfte nur alle paar Jahre (S. [111](#)).
- Das **Mobilitätsverhalten insgesamt hängt stark mit der Lage der eigenen Wohnung / des eigenen Hauses zusammen**. Bewohnerinnen und Bewohner des Zentrums von Innsbruck (am stärksten ausgeprägt in der Katastralgemeinde Innsbruck, aber auch in Hötting, Pradl und Wilten ist dieser Effekt nachzuvollziehen) fahren wesentlich weniger häufig mit dem Auto, dafür häufiger mit öffentlichen Verkehrsmitteln und vor allem dem Fahrrad bzw. gehen zu Fuß, als dies in Arzl, Mühlau und besonders in Igls und Vill der Fall ist.

### 5.2 Lebens- und Wohnbedingungen in Innsbruck

- Die **Güte der Lebens- und Wohnbedingungen** in Innsbruck wird über alle 8 Fragen hinweg in allen Teilbereichen überwiegend **sehr hoch** eingeschätzt (S. [113](#)). Am höchsten werden die **öffentlichen Verkehrsmittel** (S. [117](#)), die eigene **Verbundenheit zur Stadt Innsbruck** (S. [119](#)) und die Frage nach der **Güte von Landschaft, Natur, öffentlichen Parks und Grünflächen**

(S. 116) beurteilt. Vergleichsweise deutlich niedriger die **Wohnbedingungen** (S. 114), die **Sicherheit** (S. 115) und die **Luftqualität** (S. 117). Die **Nachbarschaftsbeziehungen** (S. 114) und die **Bedingungen für das Aufwachsen von Kindern** (S. 118) liegen dazwischen.

- Die Beurteilung der Lebens- und Wohnbedingungen unterscheidet sich zwischen den einzelnen Katastralgemeinden von Innsbruck (S. 120). Im **Summenscore** über alle 8 Fragen hinweg, schätzen die Befragten in **Mühlau** die Wohn- und Lebensbedingungen **am höchsten** und die befragten Einwohnerinnen und Einwohner von **Amras am niedrigsten** ein. Insgesamt kann festgestellt werden, dass die Lebensbedingungen in Innsbruck **in den äußeren Katastralgemeinden höher** eingeschätzt werden **als in den innerstädtischeren Gemeinden**.
- **Je stärker** eine befragte Person in ihrem Wohnumfeld vom **Straßenverkehrslärm** belastet ist (S. 125), sich selbst als **lärmempfindlich** (S. 123) einstuft, sich **Lärm ausgesetzt** (S. 126) oder von diesem **belästigt** (S. 129) fühlt, desto geringer bewertet sie über alle Fragen hinweg die **Güte der Lebensbedingungen** in Innsbruck – mit 2 Ausnahmen: Die Verbundenheit zur Stadt Innsbruck und die Güte des öffentlichen Verkehrs stehen in keinem oder deutlich geringerem Zusammenhang zu diesen Parametern.
- Ausgeprägte **Beziehungen** der Einschätzung der Lebens- und Wohnbedingungen in Innsbruck zur gegebenen Schienen- (S. 125) und Flugverkehrslärmbelastung (S. 126) finden sich im Unterschied **zur Straßenverkehrslärmbelastung** (S. 125) nicht. Die persönliche Einschätzung der eigenen Ausgesetzttheit (S. 126) und Belästigung durch Lärm (S. 129) zeigt hingegen für sämtliche Verkehrsträger Unterschiede in der Bewertung der Lebensbedingungen in Innsbruck auf.
- **Weitere Variablen** wie Alter (S. 122), höchster erreichter Schulabschluss (S. 122), Einschätzung der eigenen Lebensqualität (S. 124), Nachtschlaf bei offenem Fenster (S. 133) u.a.m. zeigen ebenfalls **deutliche Bezüge** zur Beurteilung der Lebens- und Wohnbedingungen.

### 5.3. Zufriedenheit mit der eigenen Wohnsituation

- **Über 70%** aller Befragten sind mit ihrer eigenen Wohnsituation **sehr zufrieden** und antworten in den drei höchsten von 11 möglichen Antwortkategorien, 2,7% sind nicht zufrieden und antworten in den drei Untersten (S. 134).
- Die Zufriedenheit mit der eigenen Wohnsituation ist **in den äußeren Katastralgemeinden höher** als in den inneren Stadtteilen (S. 135).
- Das Ausmaß des gegebenen **Straßenverkehrslärms zeigt deutliche Bezüge** zur Zufriedenheit mit der eigenen Wohnsituation (S. 137), für den Flugverkehrslärm gilt dies eingeschränkt (S. 139), für den Schienenverkehrslärm sind hingegen keine eindeutigen statistischen Zusammenhänge nachweisbar (S. 141).
- Aus den Daten ist ein **Schwellenwert bei etwa 40dB L<sub>n</sub> nächtlicher Straßenverkehrslärm** ersichtlich, ab welchem die Zufriedenheit mit der eigenen Wohnsituation abnimmt (S. 140).
- Befragte, die sich als **stark verkehrslärmexponiert** oder vom Verkehrslärm **stark belästigt** ansehen, sind **weniger zufrieden** mit ihrer persönlichen Wohnsituation als sich weniger dem Verkehrslärm ausgesetzt (S. 141) oder von diesem belästigt (S. 143) sehende Probandinnen und Probanden. Die deutlichsten Zusammenhänge zeigen sich in Bezug zum Straßenverkehrslärm, gering ausgeprägte Beziehungen bestehen zum Expositions- und Belästigungsempfinden gegenüber dem Schienen-, Autobahn- und Flugverkehrslärm.

- Sich stark **nicht verkehrsverursachtem Lärm** ausgesetzt oder von diesem belästigt empfindende Befragte schätzen ihre Zufriedenheit mit der eigenen Wohnsituation deutlich schlechter ein, als dies sich weniger ausgesetzt / belästigt fühlende Befragte tun. Die **Unterschiede** treten **stärker als beim verkehrsverursachten Lärm** zutage und besonders befragte Innsbruckerinnen und Innsbrucker, die sich dem **Nachbarschaftslärm**, dem **Lärm von Passanten und Gaststätten** oder aber **Erschütterungen** stark ausgesetzt (S. 142) oder von diesem belästigt (S. 143) sehen, beurteilen ihre eigene Wohnsituation insgesamt um mehr als 2 Antwortkategorien schlechter als gering Exponierte / Belästigte angeben. In Zusammenschau mit den Belästigungsreaktionen im Kapitel *Belästigung / Störung durch Lärm* (ab S. 204) wird ersichtlich, dass **Akutbelastungseffekte durch nicht verkehrsverursachtem Lärm** eine **deutliche negative Beziehung** zu einer Reihe von subjektiven Einschätzungsparametern aufweisen, die in ihrer Ausprägung stärker als beim verkehrsverursachten Lärm zutage treten.

#### 5.4. Gesundheitszustand

- **Knapp drei Viertel** aller Befragten schätzen ihren eigenen Gesundheitszustand als **gut bzw. sehr gut** ein, 8,6% als *weniger gut* bzw. *schlecht* (S. 145).
- Den größten **Zusammenhang** zur Einschätzung des eigenen Gesundheitszustandes zeigt erwartungsgemäß das **Alter** der Befragten. **Männer** schätzen ihren eigenen Gesundheitszustand geringfügig besser ein als **Frauen**. Befragte mit schlechtem selbstreferenzierten Gesundheitszustand bewerten ihr **Lebensqualität** schlechter als Befragte mit gutem Gesundheitszustand und vice versa (S. 146).
- Auffällig ist die Zusammenschau Gesundheitszustand und **höchster erreichter Bildungsabschluss**: Befragte mit Pflichtschulabschluss gehen von einem deutlich schlechteren eigenen Gesundheitszustand aus als Befragte mit sekundärem Bildungsabschluss und diese unterscheiden sich wiederum ebenso deutlich von befragten Akademikerinnen und Akademikern. Diese **Unterschiede bleiben auch altersbereinigt erhalten** und sind besonders in den beiden höheren Altersklassen sehr ausgeprägt (S. 146).
- **Bezüge zur** vorhandenen **Lärmbelastung** sind **in nur geringem Ausmaß vorhanden** (S. 147) und auch die Selbsteinschätzung der eigenen Lärmempfindlichkeit (S. 146), Ausgesetzttheit (S. 147) und Belästigung (S. 148) stehen nur geringfügig in Beziehung zur Einschätzung des eigenen Gesundheitszustandes.

#### 5.5. Lebensqualität

- Genau 1% aller Befragten beurteilt die eigene Lebensqualität in den drei untersten Antwortkategorien und damit als schlecht, **über 70%** sind hingegen der Meinung, dass ihre **persönliche Lebensqualität sehr hoch** ist und antworten in den drei obersten Antwortkategorien (S. 150).
- **Frauen** bewerten ihre persönliche Lebensqualität etwas **höher als Männer** (S. 151).
- **Knapp 80%** der Befragten mit **tertiärem höchsten erreichten Schulabschluss** schätzen ihre **eigene Lebensqualität als sehr gut ein**, bei den Probandinnen und Probanden aus der sekundären Bildungsschicht sinkt dieser Anteil auf knapp über zwei Drittel und bei Befragten mit Pflicht-

schulabschluss beurteilen nur mehr 56% ihre persönliche Lebensqualität als *sehr gut* (S. 151). Auch altersbereinigt bleiben diese Unterschiede annähernd bestehen.

- Die Einschätzung der Güte der eigenen Lebensqualität zeigt **nur geringfügige Beziehungen zur tatsächlich vorhandenen Verkehrslärmbelastung** im Wohnumfeld der Befragten (S. 152). Eine (statistisch nur gering ausgeprägte) Beziehung besteht zwischen der Einschätzung der eigenen Lebensqualität und der nächtlichen Straßenlärmbelastung. Mit steigenden nächtlichen Straßenlärmpegeln sinkt die Einschätzung der eigenen Lebensqualität (S. 152).
- Ausgeprägter als zur tatsächlich gegebenen Verkehrslärmbelastung zeigen sich Zusammenhänge zur empfundenen Ausgesetzttheit und Belästigung durch Lärm. **Je stärker sich Befragte lärmexponiert (S. 153) oder belästigt (S. 154) fühlen, desto geringer schätzen sie ihre persönliche Lebensqualität ein.** Vor allem in der Zusammenschau der Einschätzung der eigenen Lebensqualität mit dem Expositions- (S. 153) und Belästigungsempfinden (S. 155) gegenüber Erschütterungen, dem Lärm insgesamt, dem Straßenverkehrs- und dem Nachbarschaftslärm zeigen sich Bezüge.
- In der Zusammenschau der Beurteilung der eigenen Lebensqualität und der Lärmbelästigung fällt auf, dass besonders im Falle der Belästigung durch Schienenverkehrs- und Autobahnlärm die beiden Extremgruppen der Gering- und der Starkbelästigten in der Beurteilung ihrer persönlichen Lebensqualität nicht sehr weit auseinanderliegen. Sehr deutlich unterscheiden sich diese beiden **Extremgruppen** hingegen bei der Belästigung durch Straßenlärm, Nachbarschaftslärm, Lärm insgesamt und bei der Belästigung durch Erschütterungen (S. 155).
- **Im Nachtzeitraum tritt die nicht verkehrsverursachte Lärmbelästigung wesentlich deutlicher in den Vordergrund als im 24h-Zeitraum (S. 155).**

## 5.6. Lärmempfindlichkeit

- Etwas mehr als ein Viertel aller Befragten schätzt sich selbst als **überhaupt nicht bis kaum lärmempfindlich** ein (unterste 3 Antwortkategorien), knapp 17% hingegen als **stark bis außerordentlich lärmempfindlich** (oberste 3 Antwortkategorien). Die Mehrheit der Befragten siedelt das Ausmaß der eigenen Lärmempfindlichkeit in den mittleren 5 Antwortkategorien an (S. 156).
- Das Ausmaß der **Lärmempfindlichkeit** der Befragten zeigt **keine deutliche Beziehung zur tatsächlich vorhandenen Verkehrslärmbelastung im Wohnumfeld** der Befragten - im 24h-Zeitraum ebenso wenig wie im Nachtzeitraum (S. 158).
- **Stark lärmempfindliche Befragte fühlen sich häufiger und stärker vom Lärm belästigt** und sich stark vom Lärm gestört empfindende Befragte schätzen sich selbst als lärmempfindlicher ein (S. 160). Die Unterschiede im Antwortverhalten nach Lärmquelle sind besonders im Vergleich der Extremgruppen beim Straßenverkehrs- und Fluglärm, sowie dem Lärm insgesamt sehr stark ausgeprägt, während beim nicht verkehrsverursachten Lärm, sowie dem Schienenverkehrslärm die Extremgruppen geringer voneinander abweichen (S. 161).
- Bezüge zu weiteren ausgewählten Variablen (S. 157):
  - **Frauen** schätzen sich selbst häufiger und auch im Ausmaß **stärker als lärmempfindlich** ein als Männer.
  - Die Altersgruppe über 60 Jahren hat den größten Anteil an nicht bis kaum lärmempfindlichen Befragten. Insgesamt empfinden sich jedoch die Befragten der Altersgruppe der 18 bis 40-



Jährigen am wenigsten lärmempfindlich, während in der **Gruppe der 40 bis 60-Jährigen die meisten** und am stärksten **Lärmempfindlichen** enthalten sind. Insgesamt ist eine Zunahme der Häufigkeit und des Ausmaßes der Lärmempfindlichkeit mit ansteigendem Alter bis zur Schwelle des 65. bis 70. Lebensjahres festzustellen.

- Sehr deutlich unterscheiden sich (auch altersbereinigt) erneut die Bildungsschichten: **Akademikerinnen und Akademiker** stufen sich im Vergleich mit Pflichtschulabgängerinnen und -Abgängern sowohl im Ausmaß als auch in der Häufigkeit in etwa **doppelt so** stark und häufig als sehr **lärmempfindlich** ein und umgekehrt.
- Lärmempfindlichere Befragte schätzen die negativen Auswirkungen von Lärm auf die Gesundheit deutlich stärker ein als weniger Lärmempfindliche.
- Probandinnen und Probanden mit selbstreferenziertem schlechteren Gesundheitszustand sind häufiger sehr lärmempfindlich als Befragte mit gutem Gesundheitszustand.
- **Befragte** Innsbruckerinnen und Innsbrucker **mit hoher Lebensqualität** sehen sich **weniger** häufig und in geringerem Ausmaß als **lärmempfindlich** an als Personen mit geringerer Lebensqualität.
- Diejenigen Befragten, die davon ausgehen, dass es in Innsbruck im Vergleich zu anderen Städten Österreichs ruhiger ist, sind deutlich weniger häufig und weniger stark lärmempfindlich als Befragte, welche glauben, dass Innsbruck gleich laut oder lauter als andere vergleichbare Städte ist.

## 5.7. Nachtschlaf bei geöffnetem / gekipptem Fenster

- **Fast 50%** aller befragten Innsbruckerinnen und Innsbrucker **schlafen nachts häufig bis immer bei geöffnetem oder gekippten Fenster**, weitere **30%** tun dies zumindest **gelegentlich**. Nur 0,7% der Befragten verfügen über eine *Wohnraumlüftung*, 6,6% möchten nicht bei geöffnetem oder gekipptem Fenster schlafen und für 12,3% wäre dies *zu laut* (S. [166](#)).
- Wie zu erwarten schlafen Befragte, die über einen lärmgeschützten Innenhof, eine lärmabgewandte Seite oder gute bauliche Abschirmungen gegen den Verkehrslärm verfügen, häufiger bei geöffnetem oder gekipptem Fenster als Befragte, die über keinerlei oder wenig baulichen Lärmschutz verfügen. Die Unterschiede sind allerdings kleiner als erwartet und **der reine bauliche Lärmschutz an sich scheint nicht das ausschlaggebende Element** für die Entscheidung der Befragten, ob sie bei geöffnetem oder geschlossenem Fenster schlafen, zu sein (S. [167](#)).
- Befragte, die sich als stark lärmempfindlich einstufen, dem Lärm stark ausgesetzt sehen, ihre Lebens- und Wohnbedingungen schlechter einstufen, sich vom Lärm stark belastigt fühlen, oder der Meinung sind, es sei in Innsbruck lauter als in anderen vergleichbaren österreichischen Städten schlafen deutlich häufiger bei geschlossenen Fenstern, als jene die sich weniger ausgesetzt und/oder gestört fühlen bzw. weniger lärmempfindlich sind etc. Jedoch schlafen auch in diesen Extremgruppen rund zwei Drittel häufig bei geöffneten / gekippten Fenstern (S. [167](#)).
- Deutlich zeigt sich ein **Bezug zur gegebenen nächtlichen Straßenverkehrslärmbelastung** (S. [168](#)), **nicht jedoch zur Schienen- und zur** (im Nachtzeitraum vergleichsweise geringen) **Flugverkehrslärmbelastung** (S. [168](#)).

## 5.8. Baulicher Lärmschutz

- **Drei Viertel** aller Befragten **sehen die Wohnung / das Haus in dem sie wohnen als *gar nicht* oder nur *sehr geringfügig* durch bauliche Abschirmungen wie Gebäude, Mauern etc. vor Verkehrslärm geschützt**. Knapp ein Viertel der befragten Innsbruckerinnen und Innsbrucker gibt hingegen an, *zum Großteil* oder *vollständig* vom Verkehrslärm abgeschirmt zu wohnen (S. [101](#)).
- Über **zwei Drittel** der befragten Innsbruckerinnen und Innsbrucker geben an, ihre Wohnung bzw. das Haus, in dem sie wohnen, hätte einen **vor Verkehrslärm geschützten Innenhof bzw. eine lärmabgewandte Seite** (S. [101](#)), was zu **signifikant geringeren Expositions- und Belästigungsreaktionen in dieser Gruppe** führt.
- Deziert über **Lärmschutzfenster** verfügen **18%** der Befragten, knapp 17% wissen darüber nicht Bescheid und rund zwei Drittel haben keine Lärmschutzfenster verbaut (S. [102](#)). Vorrangig sollen die verbauten Lärmschutzfenster vor dem Straßenverkehrslärm schützen (S. [102](#)).

## 5.9. Lärmexpositionsempfinden

- **13,6%** aller befragten Innsbruckerinnen und Innsbrucker schätzen ihre Wohnung bzw. das Haus in dem sie leben, dem Lärm insgesamt als **stark ausgesetzt** ein, 61% antworten in den mittleren Kategorien und etwas **mehr als ein Viertel** aller Probandinnen und Probanden empfindet das eigene Wohnumfeld als **gering** dem Lärm insgesamt **ausgesetzt** (S. [173](#)).
- Die eigene **Exposition dem Flugverkehrslärm gegenüber wird im Mittel am höchsten eingeschätzt**, gefolgt von der Ausgesetzttheit gegenüber **Straßenverkehrslärm**. Erst mit deutlichem Abstand folgen **Bau- und Nachbarschaftslärm**, sowie die weiteren erfassten Lärmquellen und die **Erschütterungsexposition**. Die Ausgesetzttheit der eigenen Wohnung / des eigenen Hauses gegenüber **Schienenverkehrs- und Autobahnlärm**, sowie dem **Lärm von Gewerbe und Industrie** ist für die befragten Innsbruckerinnen und Innsbrucker im Durchschnitt am geringsten ausgeprägt (S. [170](#)).
- Befragte Innsbruckerinnen und Innsbrucker,
  - deren Wohnung durch bauliche Abschirmungen (Gebäude, Mauern etc.) vor Verkehrslärm weitestgehend geschützt sind,
  - die häufig bei geöffnetem oder gekipptem Fenster schlafen,
  - die über keine Lärmschutzfenster verfügen,

empfinden sich dem Lärm insgesamt weniger ausgesetzt. Auch bei den **subjektiven Parametern** wird der deutliche Einfluss der **Disposition** deutlich, die auch nach Adjustierung mit den gegebenen Verkehrslärmpegeln erhalten bleibt: Befragte, welche

- ihre Lebensbedingungen und ihre Lebensqualität besser einschätzen,
- zufriedener mit ihrer Wohnsituation insgesamt sind,
- von keiner Zunahme der Lärmbelastungen in den vergangenen Jahren ausgehen,
- Innsbruck im Vergleich zu anderen Städten Österreichs für ruhiger halten,
- keine Notwendigkeit für (weitere) Maßnahmen zur Lärmreduktion sehen,
- sich selbst als weniger lärmempfindlich einstufen,

fühlen sich weniger häufig und in geringerem Ausmaß lärmexponiert (S. [175](#)).

- Im Mittel die **größte Lärmexposition insgesamt** wird in **Wilten** empfunden, gefolgt von den Katastralgemeinden Innsbruck, Pradl und Hötting. Die **geringste Ausgesetzttheit** gegenüber Lärm insgesamt im eigenen Wohnumfeld empfinden die Befragten in **Mühlau, Igls und Vill** (S. 174).
- Das **Expositionsempfinden** gegenüber Lärm beginnt im sensibleren **Nachtzeitraum** im Vergleich zu den 24h-Pegeln bereits bei niedrigeren Belastungspegeln stärker zu steigen (S. 172).
- **Knapp 39%** aller Befragten sehen sich dem **Flugverkehrslärm nicht stark ausgesetzt**. Das Empfinden, wie sehr das persönliche Wohnumfeld der Befragten dem Flugverkehrslärm exponiert ist, übertrifft allerdings in der **Extremgruppe der sich stark ausgesetzt Empfindenden** in seiner Häufigkeit (**16%**) die Spitzengruppe bei der Frage nach der Lärmexposition insgesamt und liegt auch **vor dem Expositionsempfinden durch Straßenverkehrslärm** (S. 177). Entsprechend der gegebenen Fluglärmbelastung zeigt sich das mit Abstand **stärkste Fluglärmexpositionsempfinden in Hötting**. Die **geringste Ausgesetzttheit gegenüber Fluglärm** im eigenen Wohnumfeld empfinden die Befragten in **Igls** (S. 178).
- Das Ausmaß des **Expositionsempfindens gegenüber Straßenverkehrslärm** entspricht in seinen Dimensionen größtenteils dem Empfinden der Ausgesetzttheit des eigenen Wohnumfeldes gegenüber Flugverkehrslärm und liegt **nur leicht darunter** (S. 180). Das **größte Ausmaß** an empfundener Straßenlärmexposition wird mit deutlichem Abstand in **Wilten** empfunden, gefolgt von **Pradl, Innsbruck und Amras**. Die geringste Ausgesetzttheit gegenüber Straßenverkehrslärm im eigenen Wohnumfeld empfinden die Befragten in **Igls, Mühlau und Vill** (S. 182).
- Die empfundene **Ausgesetzttheit gegenüber Straßen- und Flugverkehrslärm korrespondiert sehr ausgeprägt mit der tatsächlich gegebenen Lärmbelastung und der folgenden Lärmbelästigung** (vgl. S. 178 und S. 181). Im Unterschied zum Expositionsempfinden beim Fluglärm steigt das Empfinden einer starken **Straßenverkehrslärmexposition erst bei höheren gegebenen Lärmpegeln** deutlich an und ist insgesamt geringer ausgeprägt (S. 172).
- Das Empfinden der **Exposition durch den Lärm von Baustellen** - der stark aus **Akutbelastungen** resultiert - steht in seinem Ausmaß **an dritter Stelle** hinter dem Flug- und dem Straßenverkehrslärm, unterscheidet sich aber in seinen Ausprägungen sehr deutlich von diesen beiden: Mit **über 44%** ist der Anteil an Befragten, die sich **überhaupt nicht dem Baustellenlärm exponiert** fühlen mehr als dreimal höher als beim Flug- und Straßenverkehrslärm. **Knapp zwei Drittel** aller Probandinnen und Probanden empfinden sich in ihrem Wohnumfeld als **gering** dem Lärm von Baustellen **ausgesetzt**, etwas **mehr als 10%** als **stark ausgesetzt** (S. 184). Die Befragten in **Pradl** geben gemittelt **das größte Ausmaß** an empfundener Baulärmexposition an, die befragten Innsbruckerinnen und Innsbrucker in **Vill das mit Abstand niedrigste** (S. 185).
- Das **Lärmexpositionsempfinden** gegenüber der gegebenen **Schienenverkehrslärmbelastung** liegt im Vergleich der Verkehrsquellen **deutlich unterhalb der Werte für den Straßen- und Flugverkehrslärm** und beginnt erst bei höheren Lärmpegeln stärker anzusteigen (S. 173). Im Vergleich zum Flugverkehrslärm und etwas eingeschränkter auch zum Straßenverkehrslärm ist von einer **größeren Toleranz von Dauerschallpegeln unter 50dB** ausgehend vom Schienenverkehr auszugehen, bis Befragte für sich selbst eine mittelgradige oder darüber hinausgehende Lärmexposition aus dem Schienenverkehr annehmen (S. 197). Entsprechend der gegebenen Schienenverkehrslärmbelastung zeigt sich das mit Abstand **stärkste Schienenlärmexpositionsempfinden in Wilten**. Die **geringste Ausgesetzttheit** gegenüber Schienenlärm im eigenen Wohnumfeld empfinden die Befragten in **Igls, Vill und Amras** (S. 197).

- Etwas **weniger als 2%** aller befragten Innsbruckerinnen und Innsbrucker sehen sich in ihrem Wohnumfeld **dem Autobahnlärm stark exponiert**, **über 90% nur gering**, davon **knapp 80% gar nicht** ausgesetzt (S. [199](#)). Das im Mittel stärkste Autobahnlärmexpositionsempfinden zeigt sich **in Wilten, gefolgt von Vill**. Die **geringste Ausgesetzttheit** gegenüber Autobahnlärm im eigenen Wohnumfeld empfinden die Befragten in der Innenstadt (Katastralgemeinde Innsbruck), **sowie in Igls, Pradl und Mühlau** (S. [200](#)).

## 5.10. Belästigung / Störung durch Lärm

- Die **Belästigung / Störung durch den Flugverkehrslärm** wird von den Befragten **im Mittel am höchsten** eingeschätzt, **gefolgt von der Belästigung durch den Straßenverkehrslärm**. Die Belästigungswahrnehmung von **Baustellen**, die Störung durch **Nachbarschaftslärm** und der Lärm verursacht durch **Passanten und Gaststätten** folgen mit deutlichem Abstand. Wiederum in ihrer Ausprägung deutlich dahinter schließen sich **Schienenverkehrslärm** und die Störung durch **Erschütterungen** an. Die Belästigungsreaktion auf **Lärm aus Gewerbe und Industrie** und durch **Autobahnlärm** fällt im Vergleich noch einmal deutlich geringer aus (S. [204](#)).
- **12,1%** aller befragten Innsbruckerinnen und Innsbrucker schätzen sich selbst als **vom Lärm insgesamt stark belästigt** ein, etwas mehr als die Hälfte (51,2%) antworten in den mittleren Kategorien und **36,7%** aller Probandinnen und Probanden sehen sich selbst als **nur gering lärmbelästigt** an (S. [210](#)).
- Insgesamt **am stärksten vom Lärm belästigt / gestört** zeigen sich die befragten Innsbruckerinnen und Innsbrucker in **Wilten, gefolgt von Innsbruck, Pradl und Hötting**. In der Summe aller Lärmquellen am geringsten belästigt empfinden sich die Bewohnerinnen und Bewohner von **Igls, Vill und Mühlau** (S. [207](#)).
- **Frauen** empfinden sich **stärker vom Lärm belästigt** als Männer, **ebenso die mittlere Altersgruppe der 41- bis 60-Jährigen** im Vergleich zu den Jüngeren und Älteren. Befragte, in deren Haushalt **minderjährige Kinder** leben, die zumeist bei **geöffnetem oder gekippten Fenster** schlafen, die in ihrem Wohnumfeld über eine **lärmabgewandte Seite** oder einen **Innenhof** verfügen, empfinden sich **weniger vom Lärm gestört**. Deutlich zeigen sich auch Beziehungen zwischen dem Ausmaß der Belästigung durch Lärm insgesamt und der Einschätzung und Zufriedenheit mit den eigenen Lebens- und Wohnbedingungen, den Bedingungen für das Aufwachsen von Kindern, oder auch der Verbundenheit zur Stadt Innsbruck. **Je geringer das persönliche Ausmaß der Belästigung durch Lärm bewertet wird, desto höher werden die eigenen Lebens- und Wohnbedingungen eingeschätzt und vice versa** (S. [212](#)). Dasselbe gilt auch für die Beziehungen zur Einschätzung der eigenen **Lebensqualität** und **Lärmempfindlichkeit** und einer ganzen Reihe anderer Parameter: Befragte Innsbruckerinnen und Innsbrucker, die sich **stärker lärmbelästigt** als andere fühlen (S. [213](#)),
  - beurteilen das **Lärmniveau in Innsbruck** im Vergleich zu anderen österr. Städten schlechter,
  - gehen häufiger davon aus, dass der **Lärm** in den letzten Jahren **zugenommen** hat,
  - schätzen die **negativen Wirkungen von Lärm auf die Gesundheit stärker** ein,
  - wenden **häufiger Lärmadaptationsmechanismen** an,
  - sind wesentlich **häufiger für (weitere) Maßnahmen zur Lärmreduktion**,
  - zeigen insgesamt in Bezug zu Beurteilungen der eigenen Wohn- und Lebensbedingungen eine **deutlich negativere Grundhaltung**.

Der starke Bezug zum Verkehrslärm zeigt sich auch in Zusammenschau mit der Frage nach baulichem Schutz vor demselben: **Stärker geschützt Befragte empfinden sich deutlich weniger lärmbeeinträchtigt** (S. 211).

- Der **Fluglärm** löst im befragten Kollektiv knapp vor dem Straßenverkehrslärm die **stärkste Beeinträchtigungsreaktion** aus. **11,7%** ordnen sich der Gruppe der **Starkbeeinträchtigten** zu, **39%** antworten in den mittleren Beeinträchtigungskategorien, **knapp die Hälfte** aller Befragten schätzen sich als **gering vom Fluglärm beeinträchtigt** ein (S. 215). Entsprechend der gegebenen Fluglärmbeeinträchtigung zeigt sich das mit Abstand **stärkste Fluglärmbeeinträchtigungsempfinden** in **Hötting**. Die **geringste Störung** durch Fluglärm nehmen die Befragten in **Igls** wahr (S. 216).
- Die **Beeinträchtigung durch Straßenverkehrslärm** fällt in ihrem Ausmaß sehr **ähnlich** derjenigen auf **Fluglärm** aus und fällt in ihren Ausprägungen, auch in Belastungsgruppen kategorisiert, nur sehr geringfügig hinter den Flugverkehrslärm zurück. Die Anzahl an Personen, die in der höchstmöglichen Antwortkategorie 10 (=beeinträchtigt / stört besonders stark) antwortet, ist mit **3,5%** sogar etwas höher als beim Fluglärm. **Mehr als die Hälfte** aller Befragten schätzt sich selbst als nur **gering** vom Straßenverkehrslärm **gestört** ein. Ähnlich wie beim Flugverkehrslärm fühlt sich **jede(r) 9. Befragte stark vom Straßenverkehrslärm beeinträchtigt** (S. 219). Im Unterschied zur Beeinträchtigung durch Fluglärm steigt das Beeinträchtigungsausmaß in Bezug zum Straßenverkehrslärm erst bei höheren gegebenen Lärmpegeln über 50dB L<sub>den</sub> stark an (S. 220). Das **größte Ausmaß** an Beeinträchtigung durch Straßenverkehrslärm wird in **Wilten** empfunden, gefolgt von **Pradl**, **Innsbruck** und **Amras**. Die **geringste Störung** durch Straßenverkehrslärm empfinden die Befragten in **Igls**, **Mühlau** und **Vill** (S. 220).
- Das Ausmaß der Beeinträchtigung durch Verkehrslärm zeigt einen deutlichen Zusammenhang zur gegebenen Lärmbeeinträchtigung: **Je höher die Verkehrslärmbeeinträchtigung, desto höher die Beeinträchtigung**. Allerdings unterscheiden sich die Beeinträchtigungsreaktionen in ihrer Ausprägung je nach Verkehrslärmquelle stark voneinander. **Flugverkehrslärm** wird in allen Belastungskategorien als **störender** eingestuft als der **Straßenverkehrslärm** und dieser wiederum als deutlich beeinträchtigender als der **Schieneverkehrslärm** (S. 206). Wird das gemittelte Beeinträchtigungsausmaß nach vorhandener Lärmbeeinträchtigung in 10dB-Schritten (24-Pegel L<sub>den</sub>) nach Verkehrslärmquelle verglichen, wird deutlich, dass das Beeinträchtigungsausmaß beim **Straßen- und Schienenverkehr** erst bei Dauerschallpegeln über 50dB stärker zu steigen beginnt, bis zu diesen Pegeln jedoch von den Befragten relativ niedrig eingeschätzt wird. Ab diesen „**Schwellenwerten**“ steigt das Beeinträchtigungsausmaß stark an (S. 206). **Für den Flugverkehrslärm lässt sich diese Schwelle nicht festmachen**. Das Beeinträchtigungsausmaß liegt bereits bei niedrigen Dauerlärmpegeln höher als beim Straßen- und Schienenverkehrslärm und steigt linearer an (S. 206).
- Wie schon bei der Einschätzung der Lärmexposition der eigenen Wohnung / des eigenen Hauses fällt die Beeinträchtigungsreaktion durch Baustellenlärm und die folgenden Beeinträchtigungsreaktionen deutlich anders aus, als die Störungswahrnehmung durch Flug- und Straßenverkehrslärm. **Fast die Hälfte** aller befragten Innsbruckerinnen und Innsbrucker **stört der Baustellenlärm** in der Stadt **überhaupt nicht** und fast zwei Drittel (65%) aller Probandinnen und Probanden sehen sich selbst als nur gering vom Baustellenlärm beeinträchtigt an. **Über 9%** sehen sich hingegen als **stark beeinträchtigt** und rund ein Viertel der Befragten (25,6%) antwortet in den mittleren Kategorien (S. 224). Die Befragten in **Pradl** geben **gemittelt das größte Ausmaß an Beeinträchtigung** durch Baustellenlärm an, die befragten Innsbruckerinnen und Innsbrucker in **Vill** das mit Abstand **niedrigste** (S. 224). Die Beeinträchtigung ausgehend von Baustellenlärm ist zum einen häufig ein zeitlich begrenztes Ärgernis und zum anderen zumindest teilweise unabhängig von anderen Wohn- und Lebens-



bedingungen. Das spiegelt sich auch in den Beantwortungen der einzelnen Befragten wieder. Die Unterschiede zwischen einzelnen Subgruppen fallen vergleichsweise kleiner aus und streuen stärker als bei den rein verkehrsinduzierten Lärmquellen (S. 225).

- **Über 70%** aller Befragten fühlen sich **durch Nachbarschaftslärm gar nicht oder nur geringfügig gestört**, **5%** hingegen **stark belästigt** (S. 226). In **Innsbruck, Wilten und Pradl** fühlen sich die Befragten **am stärksten** vom Nachbarschaftslärm belästigt, in **Igls, Vill und Mühlau am wenigsten** (S. 227). Aus den Auswertungen ist ersichtlich, dass Nachbarschaftslärm und die daraus resultierende Belästigung, sofern diese als stark wahrgenommen wird, sich ganz erheblich auf eine ganze Reihe von Einschätzungen zu den persönlichen **Wohn- und Lebensbedingungen** auswirkt. Diese werden **von den stärker vom Nachbarschaftslärm belästigten** befragten Innsbruckerinnen und Innsbruckern **deutlich schlechter** eingestuft, als von sich nur geringfügig lärmgestört Empfindenden. Gleiches gilt, jeweils wechselseitig, auch für die Einschätzung der eigenen Lärmempfindlichkeit und Lebensqualität (S. 228).
- Die **Belästigungsreaktion auf den Lärm von Passanten und Gaststätten** ist nahezu deckungsgleich mit derjenigen auf Nachbarschaftslärm. **4,8%** fühlen sich **ganz erheblich gestört**, **72,6%** hingegen **nur sehr geringfügig** (davon knapp 53% *überhaupt nicht*) (S. 229). Das Empfinden der eigenen Belästigung durch den Lärm von Passanten und Gaststätten **unterscheidet sich** am deutlichsten aller Belästigungsfragen **zwischen** den einzelnen **Katastralgemeinden** und ist in Abhängigkeit von der Anzahl der vorhandenen Lokale, Sehenswürdigkeiten, der Bevölkerungsdichte etc. zu sehen, wodurch sich die inneren Stadtbezirke von den äußeren abheben (S. 230).
- Deutlich **über zwei Drittel** aller befragten Innsbruckerinnen und Innsbrucker **stört der Schienenverkehrslärm in ihrem Wohnumfeld überhaupt nicht** und **über 80%** aller Probandinnen und Probanden sehen sich selbst als **nur gering** vom Schienenverkehrslärm **belästigt**. **Rund 3%** sehen sich hingegen als **starkbelästigt** und 15,6% der Befragten antworten in den mittleren Kategorien (S. 232). **Im Vergleich mit der Belästigung durch den Straßenverkehrslärm und insbesondere mit dem Flugverkehrslärm ist das deutlich geringere Belästigungsausmaß durch den Schienenverkehrslärm auffällig.** Diese geringere Störung der befragten Innsbruckerinnen und Innsbrucker durch den Schienenverkehrslärm spiegelt sich auch in der Zusammenschau der Belästigung durch den Schienenverkehrslärm mit der gegebenen Schienenlärmbelastung. Das **Belästigungsausmaß** im niederen Belastungsbereich fällt sehr gering aus und **steigt erst bei höheren gegebenen Lärmpegeln über 50dB L<sub>den</sub> stärker an.** Das Ausmaß der empfundenen Störung durch den Schienenverkehrslärm deckt sich dabei nahezu 1:1 mit der empfundenen Ausgesetzttheit gegenüber demselben. Lediglich in der höchsten Belastungskategorie über 60dB-Dauerbelastung (24h-L<sub>den</sub>) wird – wie schon beim Flug- und beim Straßenverkehrslärm – die Ausgesetzttheit von den Befragten höher angesetzt als die Belästigung (S. 233). Entsprechend der gegebenen Schienenverkehrslärbelastung zeigt sich die **stärkste Schienenlärmbelästigung in Wilten und Innsbruck.** Die **geringste Störung** durch Schienenlärm im eigenen Wohnumfeld empfinden die Befragten in **Igls, Vill und Amras** (S. 233).
- Die **Belästigungsreaktion auf Erschütterungen** ist in ihren Dimensionen der auf Schienenverkehrslärm sehr ähnlich. Über 70% werden von Erschütterungen *überhaupt nicht gestört*, **83,6%** des befragten Kollektivs sind der Kategorie der **Geringbelästigten** zuzuordnen, wohingegen **3,3%** sich selbst als **stark belästigt** einschätzen (S. 236). Das **größte Ausmaß an Belästigung** durch Erschütterungen wird **in Wilten und Innsbruck** empfunden, **das geringste in Vill und Mühlau** (S. 236).

- **1,5%** aller Befragten fühlen sich durch den **Lärm verursacht von Gewerbe und Industrie stark belästigt**, **über 90%** hingegen **nur geringfügig gestört**, unter diesen über 80% *überhaupt nicht* (S. [238](#)). Die Störung durch Lärm von Gewerbe und Industrie ist **in Mühlau und Vill am geringsten** und **in Innsbruck, Wilten und Arzl am stärksten** ausgeprägt (S. [239](#)).
- Die **Belästigung durch Autobahnlärm** im urbanen Stadtgebiet von Innsbruck fällt im befragten Kollektiv **vergleichsweise gering** aus und nimmt unter allen 10 abgefragten Lärmquellen die geringsten Ausprägungen an. 2,1% empfinden sich als stark belästigt, 91,9% hingegen **als überhaupt nicht bis gering vom Autobahnlärm gestört** (S. [241](#)). Sehr ähnlich dem Bezug zum Straßenverkehrslärm ist das Belästigungsausmaß im niederen Belastungsbereich sehr gering und steigt bei höheren gegebenen Lärmpegeln über 50dB  $L_{den}$  stark an (S. [242](#)). Die im Mittel **stärkste Belästigung** durch Autobahnlärm zeigt sich **in Wilten, gefolgt von Vill**. Die **geringste Störung** durch Autobahnlärm im eigenen Wohnumfeld empfinden die Befragten **in der Innenstadt** (Katastralgemeinde Innsbruck), **sowie in Igls, Pradl und Mühlau** (S. [243](#)).

### 5.11. Belästigung / Störung durch Lärm im Schlaf

- Im Mittelwertvergleich der einzelnen Lärmquellen verändert sich das Bild der Belästigungsreaktion auf Lärm im Schlaf im Vergleich zur Belästigungsausprägung auf Lärm im 24h-Zeitraum: Zunächst ist festzuhalten, dass sich das **Ausmaß der Belästigung im Nachtzeitraum in etwa halbiert**. Des Weiteren rückt der **Straßenverkehrslärm an die erste Stelle als störendste Lärmquelle, gefolgt vom verursachten Lärm durch Passanten und Gaststätten und dem Nachbarschaftslärm**. Der **Flugverkehrslärm fällt an die vierte Stelle, der Baustellenlärm an die fünfte Stelle zurück**. Erschütterungen, Lärm von Gewerbe und Industrie und Autobahnlärm verbleiben in dieser Reihenfolge auf den Plätzen, der am wenigsten belästigendsten Lärmquellen (S. [245](#)).
- **7,8%** aller befragten Innsbruckerinnen und Innsbrucker schätzen sich selbst als vom Lärm insgesamt im Schlaf stark belästigt ein, knapp ein Viertel antwortet in den mittleren Kategorien und **über zwei Drittel** aller Probandinnen und Probanden sehen sich selbst als **nur gering im Schlaf lärmbelästigt** an, **davon über 45% überhaupt nicht belästigt** (S. [251](#)).
- Das Ausmaß der Belästigung durch Verkehrslärm zeigt auch für den Nachtzeitraum (22h bis 6h) einen starken Zusammenhang zur gegebenen Lärmbelastung: **Je höher die Verkehrslärmbelastung, desto höher die Belästigung**. Die Unterschiede zwischen den drei Verkehrslärmquellen Straße – Schiene – Flugverkehr nivellieren sich jedoch. Aufgrund der geringeren Flugverkehrslärmbelastung der Innsbruckerinnen und Innsbrucker in der Nacht ist diese im gruppierten Vergleich nur für die Geringbelasteten <45dB sinnvoll heranzuziehen, nimmt in dieser Belastungsgruppe aber auch in den Nachtstunden den Platz als störendste Lärmquelle ein. **Die im Schlaf störendste Verkehrslärmquelle insgesamt ist der Straßenverkehr. Der für den 24h-Zeitraum deutliche Abstand zum Belästigungsausmaß des Schienenverkehrs verringert sich** (S. [247](#)).
- Im Vergleich des gemittelten Belästigungsausmaßes im Schlaf nach vorhandener Lärmbelastung in 10dB-Schritten (Nachtlärmpegel  $L_n$ ) nach Verkehrslärmquelle zeigt sich erneut das höhere Belästigungsausmaß des Flugverkehrslärms gegenüber dem Straßen- und Schienenverkehrslärm. Auch ist erkennbar, dass die **Belästigungsreaktion** auf Verkehrslärm sich unabhängig von der Quelle bereits **bei deutlich niedrigeren Lärmpegeln** zu verstärken beginnt und kontinuierlicher ansteigt als in Zusammenschau mit den 24h-Pegeln. Ein „**Schwellenwert**“ ab dem eine gesteigerte Belästigung / Störung durch den Verkehrslärm eintritt, ist für die Belästigung im Schlaf **nicht** auf den ersten Blick **auszumachen** (S. [247](#)).

- Insgesamt **am stärksten im Schlaf vom Lärm belästigt / gestört** zeigen sich die Befragten in **Wilten und Innsbruck** mit deutlichem Abstand gefolgt von Pradl und Hötting. In der Summe aller Lärmquellen **am geringsten belästigt** empfinden sich die Bewohnerinnen und Bewohner von **Igls, Vill und Mühlau** (S. [248](#)).
- **Frauen** empfinden sich insgesamt **deutlich stärker vom Lärm im Schlaf belästigt als Männer**, insbesondere in der Extremgruppe der sich stark im Schlaf gestört Empfindenden (S. [252](#)). Ähnliches gilt für die **mittlere Altersgruppe** der 41- bis 60-Jährigen im Vergleich zu jüngeren und älteren Befragten. Der höchste erreichte Schulabschluss korrespondiert ebenfalls mit dem Belästigungsausmaß durch Lärm insgesamt im Schlaf: **Akademikerinnen und Akademiker empfinden sich überdurchschnittlich, Pflichtschulabgängerinnen und –Abgänger hingegen unterdurchschnittlich stark belästigt**. Befragte, in deren Haushalt minderjährige Kinder leben, die zumeist bei geöffnetem oder gekippten Fenster schlafen (S. [254](#)), die in ihrem Wohnumfeld über eine lärmabgewandte Seite, einen Innenhof oder baulichen Lärmschutz verfügen, empfinden sich auch im Schlaf weniger vom Lärm gestört. Erkennbar sich auch **Beziehungen** zwischen dem Ausmaß der Belästigung im Schlaf durch Lärm insgesamt und der **Einschätzung und Zufriedenheit mit den eigenen Lebens- und Wohnbedingungen** (S. [253](#)), den Bedingungen für das Aufwachsen von Kindern etc. Die Bezüge sind allerdings geringer ausgeprägt als für die Belästigung durch Lärm im 24h-Zeitraum. Dasselbe gilt auch für die Beziehungen zur Einschätzung der eigenen Lebensqualität (S. [254](#)) und Lärmempfindlichkeit und einer ganzen **Reihe anderer Parameter** (S. [254](#)): Befragte Innsbruckerinnen und Innsbrucker, die sich im Schlaf lärmbelästigt fühlen,
  - beurteilen das Lärmniveau in Innsbruck im Vergleich zu anderen österr. Städten schlechter,
  - gehen häufiger davon aus, dass der Lärm in den letzten Jahren zugenommen hat,
  - schätzen die negativen Wirkungen von Lärm auf die Gesundheit stärker ein,
  - wenden häufiger Lärmadaptationsmechanismen an,
  - sind wesentlich häufiger für (weitere) Maßnahmen zur Lärmreduktion,
  - zeigen insgesamt in Bezug zu Beurteilungen der eigenen Wohn- und Lebensbedingungen eine deutlich negativere Grundhaltung.
- Durch den **Straßenverkehrslärm** im Schlaf **stark belästigt** empfinden sich **5,4%** aller Befragten, mehr als die Hälfte aller Befragten nimmt keine Belästigung im Schlaf wahr und insgesamt ordnen sich **über drei Viertel** aller Befragten der Gruppe der **gering im Schlaf Lärmbelästigten** zu (S. [256](#)). In der Zusammenschau der Belästigung durch Straßenverkehrslärm im Schlaf mit der gegebenen nächtlichen Straßenverkehrslärmbelastung zeigt sich ein dem 24h-Zeitraum sehr vergleichbares, etwas kontinuierlicheres Ansteigen des Belästigungsausmaßes. Ein „Schwellenwert“ ab welchem ein stärkeres Ansteigen der Belästigungsreaktion auftritt, ist im Gegensatz zum 24h-Zeitraum nicht eindeutig festzumachen (S. [257](#)). Das **größte Ausmaß an Belästigung** durch Straßenverkehrslärm im Schlaf wird mit einigem Abstand **in Wilten** empfunden, gefolgt von Innsbruck, Pradl und wiederum mit einigem Abstand Hötting. Die **geringste Störung** durch Straßenverkehrslärm im Schlaf im eigenen Wohnumfeld empfinden die Befragten **in Vill und Igls** (S. [257](#)). Spannend sind Bezüge einzelner Fragestellungen zur Belästigung im Schlaf durch Straßenverkehrslärm (wie auch für andere Lärmquellen) in Abhängigkeit von der vorhandenen nächtlichen Straßenverkehrslärmbelastung. So wird etwa die (beabsichtigt) diffus gestellte Frage nach der Einschätzung der Güte der Sicherheit in Innsbruck von stärker belasteten und belästigten Befragten deutlich schlechter eingestuft, als von weniger Lärmbelasteten und -Belästigten (S. [259](#)).
- Die wahrgenommene **Belästigung im Schlaf durch den Lärm verursacht von Passanten und Gaststätten** ist in ihren Ausprägungen **nahezu deckungsgleich** mit jener durch den Straßenver-

kehrslärm. Im Mittel liegen die Antworten der befragten Innsbruckerinnen und Innsbrucker jedoch unterhalb der Werte vom Straßenverkehrslärm (S. 261). Die Belästigung im Schlaf durch den Lärm von Passanten und Gaststätten ist **in den inneren Stadtbezirken naturgemäß größer** und in Vill, Igls und Mühlau de facto nicht existent (S. 261).

- Die **Belästigung im Schlaf durch Nachbarschaftslärm** steht auf **Platz drei der am meisten störenden Lärmquellen im Nachtzeitraum**. **4,3%** aller Probandinnen und Probanden schätzen sich als **stark** vom Nachbarschaftslärm im Schlaf **belästigt** ein, **über 80%** als **gering belästigt**, davon knapp zwei Drittel *überhaupt nicht gestört* (S. 264). Die Belästigung durch Nachbarschaftslärm im Schlaf nach Katastralgemeinden unterscheidet sich vom 24h-Zeitraum: Liegen Innsbruck, Wilten und Pradl im Antwortverhalten der Befragten im 24h-Zeitraum nahezu gleichauf, so sehen sich die befragten **Wiltenerinnen und Wiltener im Nachtzeitraum stärker** vom Nachbarschaftslärm **im Schlaf gestört** als die Einwohnerinnen und Einwohner der Katastralgemeinde Innsbruck und diese wiederum stärker als die Pradlerinnen und Pradler. **Am wenigsten** vom Nachbarschaftslärm **im Schlaf gestört** empfinden sich die Befragten in **Vill und Igls** (S. 265). Die Störung durch Nachbarschaftslärm in der Nacht zeigt vergleichsweise **stark ausgeprägte Beziehungen** zu den Fragen **zu den eigenen Wohn- und Lebensbedingungen** (S. 265).
- Die **Belästigung im Schlaf durch** den nächtlichen **Flugverkehrslärm** ist **in den einzelnen – vergleichsweise niederen – Lärmbelastungsklassen** im Unterschied zur empfundenen Störung im Schlaf durch den nächtlichen Straßen- und Schienenverkehrslärm **in etwa gleich hoch wie im 24h-Zeitraum und steigt sehr linear mit zunehmender Belastung an** (S. 268). Im Nachtzeitraum sind **keine Befragten mit Dauerschallpegeln über 50dB L<sub>n</sub> aus dem Flugverkehr belastet**, weshalb das **Belästigungsempfinden** durch Flugverkehrslärm **in der Nacht insgesamt vergleichsweise gering** ausgeprägt ist: **Knapp 4%** aller befragten Innsbruckerinnen und Innsbrucker fühlen sich im Schlaf durch Flugverkehrslärm **stark gestört**, **knapp 85%** aller Probandinnen und Probanden sehen sich selbst als **nur gering im Schlaf fluglärmbelästigt** an, davon über 70% *überhaupt nicht belästigt* (S. 267). Entsprechend der gegebenen Fluglärmbelastung zeigt sich auch in der Nacht das **stärkste Fluglärmbelästigungsempfinden in Hötting**. Die **geringste Störung** durch Fluglärm im Schlaf nehmen die Befragten **in Igls, Mühlau und Vill** wahr (S. 268).
- Für die Nachtstunden ist nicht von ausgeprägten Baustellentätigkeiten auszugehen, was sich auch in der Beantwortung durch die Befragten nach der Belästigung im Schlaf durch Baustellenlärm widerspiegelt: **Knapp 90%** aller Befragten sehen sich **überhaupt nicht bis gering von Baustellenlärm im Schlaf gestört**, **2,1%** gehören hingegen den im Schlaf **stark Lärmbelästigten** an (S. 271).
- **Keine Belästigung durch Schienenverkehrslärm im Schlaf** nehmen **über 83%** der Befragten wahr, insgesamt sind über 90% *überhaupt nicht* bis gering lärmbelästigt. **1,5%** sehen sich als **stark** vom Schienenverkehrslärm **im Schlaf gestört** an (S. 273). Eine **Belästigung durch den Schienenverkehrslärm im Schlaf** ist bis zu Dauerbelastungen von 40dB im Wohnumfeld der Befragten kaum vorhanden und fällt auch bei nächtlichen Dauerlärmpegeln über 50dB **vergleichsweise gering** aus. Eine **steigende Belästigungsreaktion (auf niedrigem Niveau) beginnt bei etwa 10dB niedrigeren Lärmpegeln als im 24h-Zeitraum einzusetzen** (S. 274). Entsprechend der gegebenen Schienenverkehrslärmbelastung zeigt sich auch für den Nachtzeitraum die **stärkste Schienenlärmbelästigung in Innsbruck und Wilten**. Die **geringste Störung** durch Schienenlärm **im Schlaf** im eigenen Wohnumfeld empfinden die Befragten **in Igls und Vill**, wo - wie schon für den 24h-Zeitraum - fast keine Belästigung durch den Schienenverkehrslärm von den Befragten festgestellt wird (S. 275).

- Die **Belastungsausprägungen durch Erschütterungen im Schlaf** sind in ihren Dimensionen **nahezu deckungsgleich jenen des Schienenverkehrslärms** und fallen gering aus (S. [277](#)).
- Eine **Belästigung in den Nachtstunden durch Lärm aus Gewerbe und Industrie** ist für die **überwiegende Mehrheit** der Befragten in Innsbruck **nicht vorhanden**. Mehr als 90% sehen sich überhaupt nicht gestört, rund ein Prozent (10 von 1031 befragten Personen) fällt in die Gruppe der stark vom Lärm aus Gewerbe und Industrie im Schlaf Belästigten (S. [280](#)).
- Autobahnlärm spielt wie schon bei der Frage nach der Belästigung allgemein auch im Nachtzeitraum für nur sehr wenige befragte Innsbruckerinnen und Innsbrucker eine größere Rolle. Nur **rund 1%** der 1031 Befragten **stört der Autobahnlärm im Schlaf stark**, knapp 96% aller Befragten sehen sich selbst als nur gering im Schlaf autobahnlärmbelästigt an, davon **fast 92% überhaupt nicht belästigt** (S. [283](#)). Das Belästigungsausmaß im niederen Belastungsbereich ist sehr gering ausgeprägt, beginnt aber im Vergleich zum 24h-Zeitraum bei rund 10dB niedrigeren Dauerschallpegeln, ab Belastungen von etwa 40dB L<sub>n</sub>, auf niedrigem Niveau anzusteigen (S. [283](#)). Die im Mittel **stärkste Belästigung im Schlaf** durch Autobahnlärm zeigt sich **in Wilten und Vill**. Die **geringste Störung** durch Autobahnlärm in der Nacht im eigenen Wohnumfeld empfinden die Befragten **in Igls, Mühlau und Pradl, sowie in der Innenstadt** (S. [284](#)).

## 5.12. Lärmcoping

- Lärmcopingmechanismen als **Reaktionen auf und zur Bewältigung von Lärmbelastungen** wurden in Ansätzen erhoben (aktives und passives instrumentelles, emotionales und politisches Copingverhalten). Über alle 7 Fragen hinweg (Summenscore) zeigen **23,5%** der Befragten ein **ausgeprägtes Lärmadaptationsverhalten, rund drei Viertel nicht** (S. [288](#)).
- Die befragten Innsbruckerinnen und Innsbrucker haben wegen der Belästigung durch Lärm schon zumindest einmal (S. [287](#)):
 

|                                                         |                  |
|---------------------------------------------------------|------------------|
| ○ <b>Sich geärgert:</b>                                 | <b>über 55%</b>  |
| ○ <b>Die Fenster auch im Sommer nachts geschlossen:</b> | <b>knapp 46%</b> |
| ○ <b>Gespräche mit Nachbarn geführt:</b>                | <b>über 34%</b>  |
| ○ <b>Sich hilflos gefühlt:</b>                          | <b>knapp 24%</b> |
| ○ <b>Den Garten oder Balkon nicht genutzt:</b>          | <b>über 21%</b>  |
| ○ <b>Ihre Wohnräume anders als sonst genutzt:</b>       | <b>15,4%</b>     |
| ○ <b>Gespräche mit Behörden geführt:</b>                | <b>13%</b>       |
- Eine Reihe von Faktoren zeigt **Zusammenhänge** zum Lärmcoping. Unter anderem die vorhandene **Lärmbelastung**, die **Lärmempfindlichkeit** und das **Gefühl der Ausgesetztheit** gegenüber Verkehrslärm, sowie das **Belästigungsempfinden**. Sehr deutlich treten die Unterschiede im Verhalten der befragten Innsbruckerinnen und Innsbrucker auch in Abhängigkeit von **baulichem Lärmschutz** in deren Wohnumfeld zutage (vgl. z. Bsp. S. [289](#)).
- **Höhere gegebene Verkehrslärmbelastungen führen zu deutlich steigendem Lärmcopingverhalten** (S. [294](#)). In der Zusammenschau mit den gegebenen Verkehrslärmpegeln werden sehr deutliche **Unterschiede zwischen den einzelnen Belastungsgruppen** sichtbar: Knapp ein Drittel der vom 24h-Straßenlärm stark Belasteten hat sich schon zumindest einmal hilflos gegenüber dem Verkehrslärm gefühlt. In der Gruppe der vom Straßenlärm gering belasteten Befragten sind es etwas weniger als 9%. Beim Flug- und Schienenverkehrslärm fällt auf, dass die Gruppe der gering Belasteten deutlich stärker reagiert, als auf die Lärmbelastung durch den Straßenverkehr und



beim Fluglärm die mittelgradig belasteten Befragten sogar häufiger emotionales Coping zeigen, als die Starkbelasteten. Die Unterschiede zwischen den einzelnen Belastungsgruppen fallen beim Flug- und Schienenverkehrslärm insgesamt geringer aus (S. [290](#)).

- **Weibliche Befragte reagieren geringfügig häufiger** auf Lärm als Männer. Die jüngsten Befragten zeigen das geringste Lärmadaptationsverhalten, die **mittlere Altersklasse** der 41- bis 60-Jährigen das am deutlichsten ausgeprägte. **Je höher der erreichte höchste Schulabschluss, desto häufiger geben Befragte an, Lärmbewältigungsmechanismen einzusetzen.** Befragte, welche durch bauliche Abschirmungen (Gebäude, Mauern, Innenhöfe ...) zumindest zum Teil vor Verkehrslärm geschützt wohnen, haben weniger **Lärmcopingbedarf**. Befragte, welche der Meinung sind, in Innsbruck sei es lauter oder gleich laut wie in anderen vergleichbaren Städten Österreichs, zeigen ein stärkeres Lärmadaptationsverhalten als Befragte, die glauben, dass es in Innsbruck ruhiger als in anderen Städten sei (S. [294](#)).
- **Noch stärker als in Zusammenschau mit der gegebenen Lärmbelastung steigt die Häufigkeit der eingesetzten Lärmadaptationsmechanismen mit zunehmender empfundener Lärmbelästigung** (S. [295](#)). Die einzelnen Quellen der Verkehrslärmbelästigung (Straßen-, Flug- oder Schienenverkehrslärm) zeigen im Summenscore dabei keine ausgeprägten Abweichungen voneinander. Ähnliches gilt für die nicht verkehrsverursachte Lärmbelästigung: Im Vergleich der Extremgruppen fällt bei der Belästigung durch Erschütterungen, Nachbarschaftslärm und Lärm aus Gewerbe und Industrie ein stärker ausgeprägtes Lärmcopingverhalten als bei den anderen Belästigungslärmquellen auf (S. [296](#)).
- **Fühlen sich Befragte durch Lärm in der Nacht im Schlaf gestört, fallen die Lärmbewältigungsmechanismen stärker aus** und werden bereits bei niedrigeren Belästigungsausmaßen gesetzt als in der Zusammenschau mit der Belästigung durch den Lärm insgesamt (S. [297](#)).

### 5.13. Empfundene Zu- oder Abnahme des Lärmbelastungen in Innsbruck

- Eine **deutliche Mehrheit** der befragten Innsbruckerinnen und Innsbrucker ist **der Meinung, dass die Lärmbelastungen** in der Stadt in den letzten Jahren **nicht zugenommen haben (57,7%)**, über 42% hingegen gehen hingegen davon aus, dass die Lärmbelastungen zugenommen haben. Mit **knapp 95%** relativ einig sind sich die Befragten dahingehend, dass die **Lärmbelastungen** in den letzten Jahren **nicht abgenommen** haben (S. [298](#)).
- Die **gegebene Lärmbelastung** durch die Verkehrsträger **zeigt keine ausgeprägten Beziehungen** zur Einschätzung der Befragten, ob sich die Lärmbelastung in Innsbruck in den vergangenen Jahren verändert hat. Deutlich stärker korrespondieren Faktoren wie die Einschätzung der eigenen **Lebensqualität**, die **Lebens- und Wohnbedingungen**, die eigene **Lärmempfindlichkeit** und das Gefühl der **Ausgesetztheit** gegenüber Lärm (S. [298](#)).
- Die empfundene Störung durch Lärm zeigt mit steigendem Ausmaß unabhängig von der Quelle der Lärmbelästigung in Zusammenschau mit der Einschätzung der Lärmbelastungsveränderung in Innsbruck sehr einheitlich eine deutlich steigende Tendenz der Befragten, von einer gefühlten Zunahme der Lärmbelastung auszugehen. **Rund 70% der Starkbelästigten gehen relativ unabhängig von der Quelle der Belästigung** (Ausnahme Schienenverkehrslärmbelästigung) **von Lärmzunahmen aus**, während es bei den geringbelästigten Befragten im Mittel nur ein Drittel ist (S. [300](#)).

#### 5.14. Einschätzung der Negativwirkung von Lärm auf die Gesundheit

- Mehr als **drei Viertel** (75,8%) der befragten Innsbruckerinnen und Innsbrucker **gehen davon aus, dass sich Lärm eher stark bis sehr stark negativ auf die Gesundheit auswirkt**, 21% nehmen an, dass Lärmbelastungen nur geringe Gesundheitswirkungen aufweisen (S. [302](#)).
- **Männer gehen** von einer deutlich **geringeren negativen Wirkung** von Lärm auf die Gesundheit **aus** als Frauen, während das **Alter** der Befragten **kaum Einflüsse** zeigt. Die vorhandene Lärmbelastung zeigt nur beim Straßenverkehrslärm Beziehungen zur Einschätzung der negativen Wirkung von Lärm auf die Gesundheit auf, wobei diese vergleichsweise gering ausgeprägt sind. Deutlich stärker fallen die Korrelationen zum Ausmaß der **Lärmempfindlichkeit**, dem Gefühl der **Ausgesetztheit** gegenüber Lärm, sowie den **Belästigungsauswertungen** aus (S. [303](#)).
- Stark unterschiedlich antworten Befragte in Abhängigkeit von ihrem höchsten bisher erreichten Schulabschluss: **Von den Akademikerinnen und Akademikern gehen über 86% davon aus, dass Lärm starke negative Auswirkungen auf die Gesundheit hat, während bei den Pflichtschulabgängerinnen und –Abgängern etwas mehr als 61% dieser Meinung sind** (S. [303](#)).
- Befragte, welche davon ausgehen, dass die negativen Wirkungen von Lärm auf die Gesundheit stark ausgeprägt sind, sind auch wesentlich häufiger der Ansicht, dass **(weitere) Maßnahmen zur Lärmreduktion in Innsbruck** getroffen werden sollten und umgekehrt (S. [304](#)).

#### 5.15. Einfluss von Wind und Wetter auf die Lärmbelastung

- **Zwei Drittel** aller befragten Innsbruckerinnen und Innsbrucker **glauben, dass die Wind- und Wetterverhältnisse sich gar nicht oder eher wenig auf die Lärmbelastung auswirken**. 38 Befragte geben an, dass sie diese Frage nicht beurteilen können und **30%** der Probandinnen und Probanden sind der Meinung, dass sich die Wind- und Wetterverhältnisse **eher stark bis sehr stark** auf die Lärmbelastung insgesamt auswirken (S. [163](#)).

#### 5.16. Bekanntheit der Umgebungslärmkarten

- Etwas mehr als **21%** aller Befragten haben **schon einmal von Umgebungslärmkarten gehört**, oder sich diese sogar angesehen. **Mehr als drei Viertel** der Probandinnen und Probanden sind diese **unbekannt** (S. [305](#)).
- Die Bekanntheit der Umgebungslärmkarten nimmt mit zunehmendem **Alter** leicht ab. **Männer** geben doppelt so häufig wie Frauen an, dass ihnen Umgebungslärmkarten bekannt sind. Je höher der höchste bisher erreichte **Schulabschluss**, desto eher haben Befragte schon von Umgebungslärmkarten gehört oder sich diese angesehen. **Befragte, die angeben, schon zumindest einmal mit Behörden über die Lärmbelastung gesprochen zu haben, kennen die Umgebungslärmkarten nicht häufiger, als jene, die das noch nie getan haben**. Befragte, die (weitere) Maßnahmen zur Lärmreduktion in Innsbruck für sinnvoll halten, geben deutlich häufiger an, von Umgebungslärmkarten schon gehört oder sich diese angesehen zu haben (S. [305](#)).

### 5.17. Einschätzung des Lärmniveaus von Innsbruck im Städtevergleich

- Bei der Frage, wie laut es in Innsbruck im Vergleich zu anderen Städten in Österreich ist, gehen die Meinungen der Befragten auseinander. Während etwas mehr als **28% der Meinung** sind, **es wäre in Innsbruck ruhiger bis viel ruhiger**, gehen **knapp 17%** davon aus, dass es **lauter bis viel lauter** sei. Etwas mehr als die  **Hälfte** der Befragten  **glaubt**, dass das  **Lärmniveau in Innsbruck** in etwa dem anderer österreichischer Städte  **entspricht** (S. [306](#)).  **Im Mittel gehen die Befragten davon aus, dass es Innsbruck in etwa gleich ruhig oder laut im Vergleich zu anderen österreichischen Städten ist, mit leichter Tendenz, dass es etwas ruhiger sei** (S. [306](#)). Einzelne bivariate Auswertungen finden sich auf S. [308](#).

### 5.18. Einschätzung des eigenen Lärmbeitrags zur Gesamtlärmbelastung

- **Der eigene Beitrag zur Gesamtlärmbelastung in Innsbruck wird von den Befragten größtenteils als sehr gering bis gering eingeschätzt (75,2%). Nur 2,8% sind der Meinung, Sie selber tragen stark oder sehr stark zur Lärmbelastung bei.** 22% gehen davon aus, ihr eigener Lärmbeitrag sei *durchschnittlich*. Im Mittel gehen die befragten Innsbruckerinnen und Innsbrucker davon aus, ihr eigener Beitrag zum Lärm in Innsbruck sei *gering* (S. [310](#)).
- Wird das  **Mobilitätsverhalten** der Befragten nach der Häufigkeit der Nutzung einzelner Verkehrsmittel aufgeschlüsselt, können die Unterschiede in der Empfindung des eigenen Lärmbeitrages zur Gesamtlärmsituation in Innsbruck verfeinert werden: Diejenigen Befragten, die sich regelmäßig mit  **öffentlichen Verkehrsmitteln** bewegen, glauben (ohne Adjustierung anderer Prädiktoren und Kovariablen) den  **geringsten Beitrag** zum Gesamtlärm beizusteuern, (fast) tägliche  **Autofahrerinnen und Autofahrer den größten**. Die Unterschiede zwischen diesen beiden Extremgruppen fallen sehr deutlich aus. Zwischen regelmäßigen Fußgängerinnen und Fußgängern und den (fast) täglichen Nutzerinnen und Nutzern von Fahrrädern bestehen kaum Unterschiede. Auch die gelegentlichen Nutzerinnen und Nutzer von Flugzeugen erkennen für sich keinen per se größeren Lärmbeitrag (S. [312](#)).

### 5.19. Einschätzung der störendsten Lärmquelle in Innsbruck

- **Fast 40%** im befragten Kollektiv nehmen an, dass der  **Straßenverkehrslärm** die Innsbruckerinnen und Innsbrucker insgesamt am meisten belästigt oder stört.  **Mit über 15 Prozentpunkten Abstand folgt der Flugverkehrslärm an zweiter Stelle, dicht gefolgt vom Baustellenlärm.** Die Lärmwirkungen ausgehend von Passanten und Gaststätten, Nachbarschaft, Schienenverkehr und Gewerbe und Industrie folgen mit sehr großem Abstand und werden nur von vergleichsweise wenigen bis sehr wenigen Befragten als störendste Lärmquelle in Innsbruck angenommen (S. [313](#)).
- Von den einzelnen Lärmquellen geringbelastete Befragte glauben durchgehend am häufigsten, dass der Straßenverkehr die störendste Lärmquelle in Innsbruck ist. Stärker lärmbelastete Personen nähern sich den Mittelwerten an – mit einer Ausnahme:  **Stark fluglärmbelastete Innsbruckerinnen und Innsbrucker antworten entgegen dem Trend und sehen mit großem Abstand den Fluglärm als störendste Lärmquelle für Innsbruck insgesamt an** (S. [316](#)).
- Aus den Auswertungen ist ersichtlich, dass von einer bestimmten Lärmquelle stark belästigte Befragte dazu neigen, dieses Gefühl der persönlichen Störung auf die Gesamtheit Innsbrucks zu übertragen. Eine Abstraktion von der persönlichen Belästigung auf die insgesamt störendste

Lärmquelle gelingt nicht (gänzlich), oder wird bewusst nicht angestrebt. Die **Extremgruppen der Starkbelästigten schätzen die sie selbst stark belästigende Quelle überproportional häufig als störendste Lärmquelle für Gesamtinnsbruck ein**. Das gilt nicht nur für die Verkehrslärmquellen, sondern besonders ausgeprägt auch für die nicht verkehrsinduzierten Quellen (S. [317](#)).

## 5.20. Sinnhaftigkeit (weiterer) Maßnahmen zur Lärmreduktion

- Mehr als **zwei Drittel** aller Befragten **sind der Meinung, in Innsbruck sollten (weitere) Maßnahmen zur Lärmreduktion getroffen werden**. Über 14% machen keine Angaben und **knapp 19% halten (weitere) Maßnahmen zur Lärmreduktion nicht für zielführend** (S. [319](#)). Werden nur diejenigen Befragten herangezogen, die diese Frage mit *Ja* oder *Nein* beantwortet haben, sprechen sich 78% für (weitere) Lärmreduktionsmaßnahmen aus, knapp 22% dagegen (S. [319](#)).
- **Frauen** halten (weitere) Maßnahmen eher für sinnvoll als Männer. Die jüngste **Altersgruppe** der Befragten sieht eine geringere Notwendigkeit für Lärmreduktionsmaßnahmen als die beiden anderen Altersgruppen. Je höher der höchste erreichte **Bildungsabschluss**, desto eher werden Maßnahmen zur Lärmreduktion von den befragten Innsbruckerinnen und Innsbruckern befürwortet. Die Unterschiede im Antwortverhalten sind wiederum vor allem zwischen Personen mit Pflichtschulabschluss und Akademikerinnen und Akademikern sehr ausgeprägt. Probandinnen und Probanden, die Innsbruck im Vergleich mit anderen österreichischen Städten für lauter halten, sprechen sich häufiger für (weitere) Maßnahmen zur Lärmbekämpfung aus als Befragte, die Innsbruck insgesamt für ruhiger als andere vergleichbare Städte ansehen (S. [321](#)). Die **gegebene Lärmbelastung** im Wohnumfeld der Befragten ist **nicht bzw. nur in sehr geringfügigem Ausmaß ausschlaggebend** für den Grad der Zustimmung zu (weiteren) Lärmreduktionsmaßnahmen (S. [321](#)).
- Die **Befürwortung (weiterer) Maßnahmen** zur Lärmreduktion in Innsbruck **unterscheidet sich** deutlich je **nach Belästigungsgrad** der Befragten. Die vom Lärm insgesamt nur gering belästigten Befragten, erachten zu 65% weitere Maßnahmen für notwendig, dieser **Grad der Zustimmung steigt bei den Starkbelästigten auf 90%**. Dabei zeigt sich auch erneut eine **erhöhte Sensibilität auf Lärmbelastigung im Schlaf** (S. [322](#)).
- Die 691 befragten Innsbruckerinnen und Innsbrucker (67% des befragten Kollektivs), welche (weitere) Maßnahmen zur Lärmreduktion in der Stadt für sinnvoll halten, wurden weitergehend nach ihrer Meinung zu einzelnen Maßnahmenbereichen befragt. Die **Schaffung, der Schutz und der Erhalt lärmarmen Bereiche in der Stadt Innsbruck** wird von den Befragten **am häufigsten als sinnvolle Maßnahme befürwortet**. Generell werden vor allem **Förderungsmaßnahmen für sinnvoll erachtet (Förderung lärmarmen Verkehrsmittel, Maschinen usw., Förderung von Lärmschutzmaßnahmen)**, die von deutlich über 80% derjenigen Befragten, die Maßnahmen zur Lärmreduktion für zweckmäßig halten, angeregt werden (S. [324](#)). Die **Bewusstseinsbildung zur Lärmvermeidung** wird ebenfalls von über 80% aus dieser Subgruppe für wichtig erachtet, erhält aber geringere Zustimmungswerte als die Förderungsmaßnahmen auf den ersten drei Plätzen. **Strengere Kontrollen der Einhaltung von Lärmgrenzwerten**, sowie **strengere Vorschriften und Auflagen für Lärmverursacherinnen und –Verursacher** werden von rund drei Vierteln gutgeheißen. **Finanzielle Auflagen für Lärmverursacherinnen und –Verursacher**, sowie **Verkehrsbeschränkungen** hält knapp mehr als die Hälfte der Maßnahmenbefürworterinnen und –Befürworter für sinnvoll. **Bezogen auf das Gesamtkollektiv aller 1031 befragten Innsbruckerinnen und Innsbrucker befürwortet über ein Drittel auch Verkehrsbeschränkungen und finanzielle Auflagen** (S. [325](#)).

## Ausblick

Der vorliegende Bericht umfasst eine Basisdarstellung der Lärmsituation in Innsbruck und der Ergebnisse aus den Befragungen, die erste Einblicke vermitteln. Das umfangreiche Datenmaterial mit seiner breit gefächerten Schwerpunktsetzung lässt jedoch eine **Vielzahl weiterer**, wesentlich spezifischerer **Nutzungen, Aussagen und Rückschlüsse** zu, die jederzeit erarbeitet werden können:

- **Lebenswerte Stadt:** Schaffung eines Nachhaltigkeitsinstrumentariums für die zukünftige Stadtentwicklung – Innsbruck als Modellfall für die integrative Beurteilung von Gesundheit, Lebensqualität und Lebenszufriedenheit in Bezug auf Lärm und darüber hinausgehend:
  - Identifizierung lärmarmen, schützenswerter (auch kleinräumiger) Bereiche der Stadt
  - Identifizierung von (auch kleinräumigen) Problemzonen mit aktuellem und zukünftigem Konfliktpotential in Bezug auf Lärm.
  - Gezielte Ausrichtung von Aktionsplänen und Leitbildformulierungen unter Berücksichtigung aller Parameter u.v.a.m.
- **Implementierung** der aktualisierten Lärmdaten inkl. Gesamtlärmbelastung in die **Lärmkataster und Umgebungslärmkarten**.
- Beurteilung und Umsetzung konkreter öffentlicher Anliegen – auch und besonders mit Bürgerbeteiligung – auf **Basis solider, interessensunabhängiger Daten** und Grundlagen aus einer Hand.
- **GIS-Implementierungen der Belästigungsreaktion** und anderer Umfragedaten als Beurteilungskriterien für die Maßnahmenbeurteilung und –Planung, sowie als Informationsquelle für Raumordnung, Siedlungsplanung, Verkehrskonzepte, Betriebsansiedlungen, Lärminderungsplanung, Aktionspläne, Mobilitätsstrategien, Städteplanung, Erholungskonzepte, Umweltverträglichkeitsverfahren u.v.a.m.
- **Modularer Aufbau:** Auf das Pilotprojekt aufbauend können Ausbaustufen in jede Richtung einfach aufgesetzt und zusammengeführt werden: Luftgütekataster, Lebensqualitäts- und Lebenszufriedenheitsindizes allgemein und auf spezielle Aspekte bezogen, Ökologie und Umweltschutz, spezifische Lärmforschungsansätze u.v.a.m.
- **Wissenschaftliche Nutzung:**
  - Erstellung von Dosis-Wirkungs-Kurven
  - Sonderauswertungen für spezifische Belastungen / Items
  - Longitudinale oder qualitative Folgestudien
  - (Internationale) Vergleichsstudien und wissenschaftliche Vernetzung der Daten
  - Publikationen und tiefergehende Ausarbeitung einzelner Ergebnisse
- **Innovationsmotor Land Tirol und Stadt Innsbruck:** Der gewählte Ansatz und der Umfang des *Pilotprojekts Gesamtlärmbetrachtung Innsbruck* stellen bis dato ein Alleinstellungsmerkmal dar und werden dazu beitragen, bestehende Dichotomien aufzulösen: Das reine Ausmaß des Schalldrucks, sprich: die gegebene Belastung durch Lärm entspricht nicht allein der Wahrnehmung und Bewertung durch die Betroffenen. Belästigung ist von der Quellenart, der Geräuschcharakteristik und der subjektiven Beurteilung abhängig.

# Inhaltsverzeichnis

|                                                                           |               |
|---------------------------------------------------------------------------|---------------|
| <b>Vorwort der Autoren .....</b>                                          | <b>1</b>      |
| <b>Zentrale Inhalte und Ergebnisse .....</b>                              | <b>2</b>      |
| 1. Einleitungsteil .....                                                  | 2             |
| 2. Lärmdaten .....                                                        | 2             |
| 3. Lärm in Innsbruck .....                                                | 2             |
| 3.1. Belastungszonen .....                                                | 2             |
| 3.2. Verkehrslärmbelastung .....                                          | 3             |
| 3.3. Gesamtlärmbetrachtung Innsbruck .....                                | 4             |
| 4. Durchführungsparameter der Befragungen .....                           | 5             |
| 5. Auswertung der Befragungen .....                                       | 6             |
| 5.1. Mobilität .....                                                      | 6             |
| 5.2. Lebens- und Wohnbedingungen in Innsbruck .....                       | 6             |
| 5.3. Zufriedenheit mit der eigenen Wohnsituation .....                    | 7             |
| 5.4. Gesundheitszustand .....                                             | 8             |
| 5.5. Lebensqualität .....                                                 | 8             |
| 5.6. Lärmempfindlichkeit .....                                            | 9             |
| 5.7. Nachtschlaf bei geöffnetem / gekipptem Fenster .....                 | 10            |
| 5.8. Baulicher Lärmschutz .....                                           | 11            |
| 5.9. Lärmexpositionsempfinden .....                                       | 11            |
| 5.10. Belästigung / Störung durch Lärm .....                              | 13            |
| 5.11. Belästigung / Störung durch Lärm im Schlaf .....                    | 16            |
| 5.12. Lärmcoping .....                                                    | 19            |
| 5.13. Empfundene Zu- oder Abnahme des Lärmbelastungen in Innsbruck .....  | 20            |
| 5.14. Einschätzung der Negativwirkung von Lärm auf die Gesundheit .....   | 21            |
| 5.15. Einfluss von Wind und Wetter auf die Lärmbelastung .....            | 21            |
| 5.16. Bekanntheit der Umgebungslärmkarten .....                           | 21            |
| 5.17. Einschätzung des Lärmniveaus von Innsbruck im Städtevergleich ..... | 22            |
| 5.18. Einschätzung des eigenen Lärmbeitrags zur Gesamtlärmbelastung ..... | 22            |
| 5.19. Einschätzung der störendsten Lärmquelle in Innsbruck .....          | 22            |
| 5.20. Sinnhaftigkeit (weiterer) Maßnahmen zur Lärmreduktion .....         | 23            |
| <b>Ausblick .....</b>                                                     | <b>24</b>     |
| <b>Inhaltsverzeichnis .....</b>                                           | <b>25</b>     |
| <br><b>EINLEITUNG .....</b>                                               | <br><b>33</b> |
| <b>Lärm als Herausforderung .....</b>                                     | <b>33</b>     |
| <b>Projektpartner .....</b>                                               | <b>34</b>     |
| 1. Leitung .....                                                          | 34            |
| 2. Partner (alphabetisch) .....                                           | 34            |
| <b>Die Stadt Innsbruck .....</b>                                          | <b>35</b>     |
| 1. Stadtgebiet und Katastralgemeinden .....                               | 35            |
| 2. Demographie .....                                                      | 36            |
| <br><b>LÄRMDATEN .....</b>                                                | <br><b>38</b> |
| <b>Grundbegriffe Lärm .....</b>                                           | <b>38</b>     |
| 1. Schalltechnische Grundbegriffe .....                                   | 38            |
| 2. Ausbreitungsberechnungen .....                                         | 38            |
| 3. GIS-Darstellung .....                                                  | 39            |



|                                                                           |               |
|---------------------------------------------------------------------------|---------------|
| <b>Verwendete Lärmdaten.....</b>                                          | <b>40</b>     |
| 1. Die Ausgangslage.....                                                  | 40            |
| 2. Berechnung als geeignetes Verfahren .....                              | 40            |
| 3. Umgebungslärmkarten.....                                               | 41            |
| 3.1. Umfang.....                                                          | 41            |
| 3.2. Angaben zur eingesetzten Software .....                              | 41            |
| 3.3. Angaben zur Modellbildung.....                                       | 42            |
| 3.3.1. Beschreibung der Eingangsdaten Gelände.....                        | 42            |
| 3.3.2. Beschreibung der Eingangsdaten Gebäude.....                        | 42            |
| 3.3.3. Beschreibung der Eingangsdaten Lärmschutz .....                    | 42            |
| 3.3.4. Beschreibung der Eingangsdaten Bodendämpfung .....                 | 42            |
| 3.3.5. Anzahl der berücksichtigten Reflexionen und Rasterweite .....      | 43            |
| 3.3.6. Angaben zur grenzüberschreitenden Betrachtung von Lärmquellen..... | 43            |
| 4. Verkehrslärm .....                                                     | 43            |
| 4.1. Straßenverkehrslärm.....                                             | 43            |
| 4.1.1. Angaben zur Erhebung der Emissionsquellen.....                     | 43            |
| 4.1.2. Angaben zu den verwendeten Geschwindigkeiten .....                 | 43            |
| 4.1.3. Beschreibung der Eingangsdaten Straßenemissionen .....             | 43            |
| 4.2. Schienenverkehrslärm.....                                            | 44            |
| 4.2.1. Angaben zur Erhebung der Emissionsquellen.....                     | 44            |
| 4.2.2. Angaben zu den verwendeten Geschwindigkeiten .....                 | 44            |
| 4.2.3. Beschreibung der Eingangsdaten Schienenemissionen .....            | 44            |
| 4.3. Fluglärm.....                                                        | 44            |
| 4.3.1. Angaben zur Erhebung der Emissionsquellen.....                     | 44            |
| 4.3.2. Beschreibung der Eingangsdaten Flugemissionen.....                 | 44            |
| 4.4. Betroffenenbewertung - Bestimmung der betroffenen Einwohner .....    | 45            |
| 5. Nicht verkehrsinduzierter Lärm .....                                   | 45            |
| 6. Messung in Kranebitten .....                                           | 45            |
| 6.1. Lärmmessung .....                                                    | 45            |
| 6.2. Vergleich Messung – Berechnung Fluglärm .....                        | 46            |
| <b>Gesamtlärmberechnung .....</b>                                         | <b>47</b>     |
| <br><b>LÄRM IN INNSBRUCK .....</b>                                        | <br><b>48</b> |
| <b>Die Ist-Situation.....</b>                                             | <b>48</b>     |
| 1. Belastungszonen .....                                                  | 48            |
| <b>Verkehrslärmbelastung .....</b>                                        | <b>53</b>     |
| 1. 24h-Verkehrslärmbelastung .....                                        | 53            |
| 1.1. Vergleich Innsbruck gesamt – befragtes Kollektiv .....               | 53            |
| 1.2. 24h-Verkehrslärmbelastung nach Katastralgemeinden .....              | 55            |
| 2. Verkehrslärmbelastung in der Nacht .....                               | 59            |
| 2.1. Vergleich Innsbruck gesamt – befragtes Kollektiv .....               | 59            |
| 2.2. Verkehrslärmbelastung in der Nacht nach Katastralgemeinden .....     | 61            |
| <b>Gesamtlärmbetrachtung Innsbruck .....</b>                              | <b>66</b>     |
| 1. Prinzip und Limitationen.....                                          | 66            |
| 2. Zusammenführen von Schallbelastungen.....                              | 66            |
| 2. Wirkungsbezogene Darstellung .....                                     | 69            |
| 3. Hotspots .....                                                         | 76            |
| 4. Ruhige Gebiete.....                                                    | 77            |
| <br><b>DURCHFÜHRUNGSPARAMETER DER BEFRAGUNGEN .....</b>                   | <br><b>80</b> |
| <b>Setting und Untersuchungsumfang der Befragungen .....</b>              | <b>80</b>     |

|                                                                    |               |
|--------------------------------------------------------------------|---------------|
| <b>Der Fragebogen .....</b>                                        | <b>81</b>     |
| 1. Zusammenstellung .....                                          | 81            |
| 2. Aufbau und Inhaltliche Schwerpunkte .....                       | 81            |
| <b>Die Stichprobe .....</b>                                        | <b>83</b>     |
| 1. Demographische Repräsentativität .....                          | 83            |
| 1.1. Alter.....                                                    | 83            |
| 1.2. Geschlechterverteilung.....                                   | 83            |
| 1.3. Stichprobengröße .....                                        | 84            |
| 2. Repräsentative Abbildung der 9 Katastralgemeinden .....         | 84            |
| 3. Lärmkorridore .....                                             | 85            |
| <b>Rücklaufquote.....</b>                                          | <b>87</b>     |
| <b>Durchführung der Befragungen und Datenkontrolle .....</b>       | <b>89</b>     |
| <b>Datenschutz .....</b>                                           | <b>90</b>     |
| <b>Statistische Methoden .....</b>                                 | <b>91</b>     |
| 1. Deskriptive Analyse .....                                       | 91            |
| 2. Extremgruppen .....                                             | 91            |
| 3. Weiterführende Auswertungen und Inferenzstatistik.....          | 92            |
| <br><b>AUSWERTUNG DER BEFRAGUNGEN.....</b>                         | <br><b>93</b> |
| <b>Demographie.....</b>                                            | <b>93</b>     |
| 1. Alter und Geschlecht .....                                      | 93            |
| 2. Bildung .....                                                   | 94            |
| 3. Berufliche Stellung.....                                        | 95            |
| <b>Wohnen .....</b>                                                | <b>98</b>     |
| 1. Wohndauer im selben Haus / derselben Wohnung.....               | 98            |
| 2. Art des Wohnhauses und Eigentumsverhältnisse.....               | 99            |
| 3. Haushaltsgröße .....                                            | 99            |
| 4. Stockwerk des Schlafzimmers .....                               | 100           |
| 5. Vorhandene Abschirmungen.....                                   | 101           |
| 5.1. Bauliche Abschirmungen.....                                   | 101           |
| 5.2. Innenhof / Lärmabgewandte Seite.....                          | 101           |
| 6. Lärmschutzfenster .....                                         | 102           |
| <b>Mobilität.....</b>                                              | <b>103</b>    |
| 1. Pendlerinnen und Pendler.....                                   | 103           |
| 2. Mobilität im Alltag.....                                        | 104           |
| 2.1. Kraftfahrzeugnutzung als FahrerIn / Fahrer .....              | 104           |
| 2.2. Nutzung öffentlicher Verkehrsmittel in der Stadt .....        | 106           |
| 2.3. Nutzung öffentlicher Verkehrsmittel außerhalb der Stadt ..... | 107           |
| 2.4. Nutzung von Fahrrädern .....                                  | 108           |
| 2.5. Fußläufige Wege.....                                          | 109           |
| 2.6. Nutzung von Flugzeugen .....                                  | 111           |
| <b>Lebensbedingungen in Innsbruck .....</b>                        | <b>113</b>    |
| 1. Überblick Lebensbedingungen in Innsbruck .....                  | 113           |
| 2. Wohnbedingungen in Innsbruck.....                               | 113           |
| 3. Nachbarschaftsbeziehungen in Innsbruck .....                    | 114           |
| 4. Sicherheit in Innsbruck.....                                    | 115           |
| 5. Landschaft, Natur, Parks und Grünflächen in Innsbruck .....     | 116           |
| 6. Luftqualität in Innsbruck .....                                 | 116           |
| 7. Öffentliche Verkehrsmittel in Innsbruck .....                   | 117           |
| 8. Bedingungen für das Aufwachsen von Kinder in Innsbruck.....     | 118           |

|          |                                                                   |            |
|----------|-------------------------------------------------------------------|------------|
| 9.       | Verbundenheit zur Stadt Innsbruck .....                           | 119        |
| 10.      | Lebensbedingungen und ausgewählte Parameter .....                 | 119        |
| 10.1.    | Lebensbedingungen in Innsbruck und Katastralgemeinde .....        | 119        |
| 10.2.    | Lebensbedingungen in Innsbruck und Geschlecht .....               | 121        |
| 10.3.    | Lebensbedingungen in Innsbruck und Alter .....                    | 121        |
| 10.4.    | Lebensbedingungen in Innsbruck und Bildung .....                  | 122        |
| 10.5.    | Lebensbedingungen in Innsbruck und Gesundheitszustand .....       | 123        |
| 10.6.    | Lebensbedingungen in Innsbruck und Lärmempfindlichkeit .....      | 123        |
| 10.7.    | Lebensbedingungen in Innsbruck und Lebensqualität .....           | 124        |
| 10.8.    | Lebensbedingungen in Innsbruck und Verkehrslärmbelastung .....    | 124        |
| 10.8.1.  | Straßenverkehrslärmbelastung .....                                | 124        |
| 10.8.2.  | Schienenverkehrslärmbelastung .....                               | 125        |
| 10.8.3.  | Flugverkehrslärmbelastung .....                                   | 126        |
| 10.9.    | Lebensbedingungen in Innsbruck und Lärmexpositionsempfinden ..... | 126        |
| 10.9.1.  | Lärmexpositionsempfinden insgesamt .....                          | 126        |
| 10.9.2.  | Straßenlärmexpositionsempfinden .....                             | 127        |
| 10.9.3.  | Fluglärmexpositionsempfinden .....                                | 127        |
| 10.9.4.  | Schienenverkehrslärmexpositionsempfinden .....                    | 128        |
| 10.10.   | Lebensbedingungen in Innsbruck und Lärmbelästigung .....          | 128        |
| 10.10.1. | Lärmbelästigung insgesamt .....                                   | 128        |
| 10.10.2. | Straßenverkehrslärmbelästigung .....                              | 129        |
| 10.10.3. | Flugverkehrslärmbelästigung .....                                 | 130        |
| 10.10.4. | Schienenverkehrslärmbelästigung .....                             | 130        |
| 10.10.5. | Nicht verkehrsverursachte Lärmbelästigung .....                   | 131        |
| 10.11.   | Lebensbedingungen in Innsbruck und weitere Variablen .....        | 133        |
|          | <b>Zufriedenheit mit der eigenen Wohnsituation .....</b>          | <b>134</b> |
| 1.       | Wohnsituation und Katastralgemeinden .....                        | 134        |
| 2.       | Wohnsituation und ausgewählte Variablen .....                     | 135        |
| 3.       | Wohnsituation und Lärmbelastung .....                             | 137        |
| 3.1.     | Straßenverkehrslärmbelastung .....                                | 137        |
| 3.2.     | Flugverkehrslärmbelastung .....                                   | 138        |
| 3.3.     | Schienenverkehrslärmbelastung .....                               | 139        |
| 4.       | Wohnsituation und nächtliche Lärmbelastung .....                  | 140        |
| 4.1.     | Straßenverkehrslärmbelastung .....                                | 140        |
| 4.2.     | Flugverkehrslärmbelastung .....                                   | 140        |
| 4.3.     | Schienenverkehrslärmbelastung .....                               | 141        |
| 5.       | Wohnsituation und Lärmexpositionsempfinden .....                  | 141        |
| 5.1.     | Verkehrsverursachtes Lärmexpositionsempfinden .....               | 141        |
| 5.2.     | Nichtverkehrsverursachtes Lärmexpositionsempfinden .....          | 142        |
| 6.       | Wohnsituation und Lärmbelästigung .....                           | 142        |
| 7.       | Wohnsituation und Lärmbelästigung im Schlaf .....                 | 144        |
|          | <b>Gesundheitszustand .....</b>                                   | <b>145</b> |
| 1.       | Gesundheitszustand im Überblick .....                             | 145        |
| 2.       | Gesundheitszustand und ausgewählte Parameter .....                | 145        |
| 3.       | Gesundheitszustand und Lärmbelastung .....                        | 147        |
| 4.       | Gesundheitszustand und Lärmexpositionsempfinden .....             | 147        |
| 5.       | Gesundheitszustand und Lärmbelästigung .....                      | 148        |
| 6.       | Gesundheitszustand und Belästigung durch Lärm im Schlaf .....     | 149        |
|          | <b>Lebensqualität .....</b>                                       | <b>150</b> |
| 1.       | Lebensqualität im Überblick .....                                 | 150        |
| 2.       | Lebensqualität und ausgewählte Parameter .....                    | 150        |
| 3.       | Lebensqualität und Lärmbelastung .....                            | 152        |
| 4.       | Lebensqualität und Lärmexpositionsempfinden .....                 | 153        |
| 5.       | Lebensqualität und Lärmbelästigung .....                          | 154        |
| 6.       | Lebensqualität und Belästigung durch Lärm im Schlaf .....         | 155        |
|          | <b>Lärmempfindlichkeit .....</b>                                  | <b>156</b> |
| 1.       | Lärmempfindlichkeit im Überblick .....                            | 156        |

|                                                                           |            |
|---------------------------------------------------------------------------|------------|
| 2. Lärmempfindlichkeit und ausgewählte Parameter .....                    | 156        |
| 3. Lärmempfindlichkeit und Lärmbelastung.....                             | 158        |
| 4. Lärmempfindlichkeit und Lärmexpositionsempfinden .....                 | 159        |
| 5. Lärmempfindlichkeit und Lärmbelastung .....                            | 160        |
| 6. Lärmempfindlichkeit und Belästigung durch Lärm im Schlaf.....          | 162        |
| <b>Wind- und Wettereinflüsse auf die Lärmbelastung .....</b>              | <b>163</b> |
| 1. Wind- und Wettereinflüsse auf den Lärm im Überblick .....              | 163        |
| 2. Wind- und Wettereinflüsse und ausgewählte Parameter .....              | 163        |
| <b>Nachtschlaf bei geöffnetem Fenster .....</b>                           | <b>166</b> |
| 1. Nachtschlaf bei geöffnetem Fenster im Überblick .....                  | 166        |
| 2. Nachtschlaf und ausgewählte Parameter.....                             | 166        |
| <b>Lärmexpositionsempfinden.....</b>                                      | <b>170</b> |
| 1. Überblick empfundene Lärmexposition .....                              | 170        |
| 1.1. Lärmexposition nach Lärmquelle.....                                  | 170        |
| 1.2. Verkehrslärmexposition und – Belastung.....                          | 172        |
| 2. Lärmexposition insgesamt .....                                         | 173        |
| 2.1. Lärmexposition insgesamt und Katastralgemeinden .....                | 174        |
| 2.2. Lärmexposition insgesamt und ausgewählte Parameter .....             | 174        |
| 3. Flugverkehrslärmexposition .....                                       | 177        |
| 3.1. Fluglärmexposition und Fluglärmbelastung.....                        | 177        |
| 3.2. Fluglärmexposition und Katastralgemeinden .....                      | 178        |
| 3.3. Fluglärmexposition und ausgewählte Parameter.....                    | 179        |
| 4. Straßenverkehrslärmexposition.....                                     | 180        |
| 4.1. Straßenlärmexposition und Straßenlärmbelastung .....                 | 181        |
| 4.2. Straßenlärmexposition und Katastralgemeinden.....                    | 182        |
| 4.3. Straßenlärmexposition und ausgewählte Parameter.....                 | 182        |
| 5. Baustellenlärmexposition .....                                         | 184        |
| 5.1. Baustellenlärmexposition und Katastralgemeinden.....                 | 185        |
| 5.2. Baustellenlärmexposition und ausgewählte Parameter .....             | 185        |
| 6. Nachbarschaftslärmexposition .....                                     | 187        |
| 6.1. Nachbarschaftslärmexposition und Katastralgemeinden.....             | 188        |
| 6.2. Nachbarschaftslärmexposition und ausgewählte Parameter .....         | 188        |
| 7. Lärmexposition durch Passanten und Gaststätten.....                    | 190        |
| 7.1. Lärmexposition Passanten / Gaststätten und Katastralgemeinden.....   | 191        |
| 7.2. Lärmexposition Passanten / Gaststätten und einzelne Parameter.....   | 191        |
| 8. Exposition gegenüber Erschütterungen.....                              | 193        |
| 8.1. Erschütterungsexposition und Katastralgemeinden .....                | 193        |
| 8.2. Erschütterungsexposition und ausgewählte Parameter.....              | 194        |
| 9. Schienenverkehrslärmexposition.....                                    | 195        |
| 9.1. Schienenlärmexposition und Schienenlärmbelastung .....               | 196        |
| 9.2. Schienenlärmexposition und Katastralgemeinden.....                   | 197        |
| 9.3. Schienenlärmexposition und ausgewählte Parameter.....                | 198        |
| 10. Autobahnلärmexposition .....                                          | 199        |
| 10.1. Autobahnلärmexposition und Katastralgemeinden .....                 | 200        |
| 10.2. Autobahnلärmexposition und ausgewählte Parameter .....              | 200        |
| 11. Lärmexposition durch Gewerbe und Industrie .....                      | 201        |
| 11.1. Lärmexposition Gewerbe und Industrie und Katastralgemeinden.....    | 202        |
| 11.2. Lärmexposition Gewerbe und Industrie und einzelne Parameter.....    | 202        |
| <b>Belästigung / Störung durch Lärm.....</b>                              | <b>204</b> |
| 1. Überblick Belästigung / Störung durch Lärm.....                        | 204        |
| 1.1. Belästigung nach Lärmquelle .....                                    | 204        |
| 1.2. Belästigung und Verkehrslärmbelastung .....                          | 206        |
| 1.3. Belästigung und Katastralgemeinden .....                             | 207        |
| 1.3.1. Belästigung nach Quelle und Katastralgemeinden .....               | 207        |
| 1.3.2. Verkehrslärmbelastung und Katastralgemeinden .....                 | 209        |
| 1.3.3. Nicht verkehrsverursachte Belästigung und Katastralgemeinden ..... | 209        |
| 2. Belästigung durch Lärm insgesamt .....                                 | 210        |

|                                                         |                                                                                          |            |
|---------------------------------------------------------|------------------------------------------------------------------------------------------|------------|
| 2.1.                                                    | Belästigung durch Lärm insgesamt und Katastralgemeinden .....                            | 210        |
| 2.2.                                                    | Belästigung durch Lärm insgesamt und ausgewählte Parameter .....                         | 211        |
| 3.                                                      | Belästigung durch Flugverkehrslärm .....                                                 | 215        |
| 3.1.                                                    | Fluglärmelastigung, -Belastung und -Expositionsempfinden .....                           | 215        |
| 3.2.                                                    | Fluglärmelastigung und Katastralgemeinden .....                                          | 216        |
| 3.3.                                                    | Fluglärmelastigung und ausgewählte Parameter .....                                       | 216        |
| 4.                                                      | Belästigung durch Straßenverkehrslärm .....                                              | 219        |
| 4.1.                                                    | Straßenlärmelastigung, -Belastung und -Expositionsempfinden .....                        | 220        |
| 4.2.                                                    | Straßenlärmelastigung und Katastralgemeinden .....                                       | 220        |
| 4.3.                                                    | Straßenverkehrslärmelastigung und ausgewählte Parameter .....                            | 221        |
| 5.                                                      | Belästigung durch Baustellenlärm .....                                                   | 223        |
| 5.1.                                                    | Baulärmelastigung und Katastralgemeinden .....                                           | 224        |
| 5.2.                                                    | Baulärmelastigung und ausgewählte Parameter .....                                        | 225        |
| 6.                                                      | Belästigung durch Nachbarschaftslärm .....                                               | 226        |
| 6.1.                                                    | Nachbarschaftslärmelastigung und Katastralgemeinden .....                                | 227        |
| 6.2.                                                    | Nachbarschaftslärmelastigung und ausgewählte Parameter .....                             | 227        |
| 7.                                                      | Belästigung durch Lärm von Passanten und Gaststätten .....                               | 229        |
| 7.1.                                                    | Lärmelastigung Passanten / Gaststätten und Katastralgemeinden .....                      | 230        |
| 7.2.                                                    | Lärmelastigung Passanten / Gaststätten und einzelne Parameter .....                      | 230        |
| 8.                                                      | Belästigung durch Schienenverkehrslärm .....                                             | 232        |
| 8.1.                                                    | Schienenlärmelastigung, -Belastung und -Expositionsempfinden .....                       | 232        |
| 8.2.                                                    | Schienenlärmelastigung und Katastralgemeinden .....                                      | 233        |
| 8.3.                                                    | Schienenlärmelastigung und ausgewählte Parameter .....                                   | 234        |
| 9.                                                      | Belästigung durch Erschütterungen .....                                                  | 236        |
| 9.1.                                                    | Belästigung durch Erschütterungen und Katastralgemeinden .....                           | 236        |
| 9.2.                                                    | Belästigung durch Erschütterungen und ausgewählte Parameter .....                        | 237        |
| 10.                                                     | Belästigung durch Lärm aus Gewerbe und Industrie .....                                   | 238        |
| 10.1.                                                   | Lärmelastigung Gewerbe und Industrie und Katastralgemeinden .....                        | 239        |
| 10.2.                                                   | Lärmelastigung Gewerbe und Industrie und einzelne Parameter .....                        | 239        |
| 11.                                                     | Belästigung durch Autobahnlärm .....                                                     | 241        |
| 11.1.                                                   | Autobahnlärmelastigung, -Belastung und -Expositionsempfinden .....                       | 242        |
| 11.2.                                                   | Belästigung durch Autobahnlärm und Katastralgemeinden .....                              | 242        |
| 11.3.                                                   | Belästigung durch Autobahnlärm und ausgewählte Parameter .....                           | 243        |
| <b>Belästigung / Störung durch Lärm im Schlaf .....</b> |                                                                                          | <b>245</b> |
| 1.                                                      | Überblick Belästigung / Störung durch Lärm im Schlaf .....                               | 245        |
| 1.1.                                                    | Belästigung im Schlaf nach Lärmquelle .....                                              | 245        |
| 1.2.                                                    | Belästigung im Schlaf und Verkehrslärmelastigung .....                                   | 247        |
| 1.3.                                                    | Belästigung im Schlaf und Katastralgemeinden .....                                       | 248        |
| 1.3.1.                                                  | Belästigung im Schlaf nach Quelle und Katastralgemeinden .....                           | 248        |
| 1.3.2.                                                  | Verkehrslärmelastigung im Schlaf und Katastralgemeinden .....                            | 249        |
| 1.3.3.                                                  | Nicht verkehrsverursachte Lärmelastigung im Schlaf und Katastralgemeinden .....          | 250        |
| 2.                                                      | Belästigung im Schlaf durch Lärm insgesamt .....                                         | 250        |
| 2.1.                                                    | Belästigung im Schlaf durch Lärm insgesamt u. Katastralgemeinden .....                   | 251        |
| 2.2.                                                    | Belästigung im Schlaf durch Lärm insgesamt und ausgewählte Parameter .....               | 252        |
| 3.                                                      | Belästigung im Schlaf durch Straßenverkehrslärm .....                                    | 256        |
| 3.1.                                                    | Straßenlärmelastigung im Schlaf und Straßenlärmelastigung .....                          | 256        |
| 3.2.                                                    | Straßenlärmelastigung im Schlaf und Katastralgemeinden .....                             | 257        |
| 3.3.                                                    | Straßenverkehrslärmelastigung im Schlaf und andere Parameter .....                       | 257        |
| 4.                                                      | Belästigung im Schlaf durch Lärm von Passanten und Gaststätten .....                     | 260        |
| 4.1.                                                    | Lärmelastigung im Schlaf durch Passanten und Gaststätten und Katastralgemeinden .....    | 261        |
| 4.2.                                                    | Lärmelastigung im Schlaf durch Passanten und Gaststätten und ausgewählte Parameter ..... | 262        |
| 5.                                                      | Belästigung im Schlaf durch Nachbarschaftslärm .....                                     | 264        |
| 5.1.                                                    | Nachbarschaftslärmelastigung im Schlaf und Katastralgemeinden .....                      | 264        |
| 5.2.                                                    | Nachbarschaftslärmelastigung im Schlaf und einzelne Parameter .....                      | 265        |
| 6.                                                      | Belästigung im Schlaf durch Flugverkehrslärm .....                                       | 267        |
| 6.1.                                                    | Fluglärmelastigung im Schlaf und Fluglärmelastigung .....                                | 267        |
| 6.2.                                                    | Fluglärmelastigung im Schlaf und Katastralgemeinden .....                                | 268        |

|                                                                         |                                                                                               |     |
|-------------------------------------------------------------------------|-----------------------------------------------------------------------------------------------|-----|
| 6.3.                                                                    | Fluglärmelastigung im Schlaf und ausgewählte Parameter .....                                  | 268 |
| 7.                                                                      | Belastigung im Schlaf durch Baustellenlärm.....                                               | 270 |
| 7.1.                                                                    | Baulärmelastigung im Schlaf und Katastralgemeinden.....                                       | 271 |
| 7.2.                                                                    | Baulärmelastigung im Schlaf und ausgewählte Parameter.....                                    | 272 |
| 8.                                                                      | Belastigung im Schlaf durch Schienenverkehrslärm .....                                        | 273 |
| 8.1.                                                                    | Schienenlärmelastigung im Schlaf und Schienenlärmelastigung.....                              | 274 |
| 8.2.                                                                    | Schienenlärmelastigung im Schlaf und Katastralgemeinden .....                                 | 274 |
| 8.3.                                                                    | Schienenlärmelastigung im Schlaf und ausgewählte Parameter .....                              | 275 |
| 9.                                                                      | Belastigung im Schlaf durch Erschütterungen .....                                             | 277 |
| 9.1.                                                                    | Belastigung im Schlaf durch Erschütterungen und Katastralgemeinden.....                       | 277 |
| 9.2.                                                                    | Belastigung im Schlaf durch Erschütterungen und ausgewählte Parameter ....                    | 278 |
| 10.                                                                     | Belastigung im Schlaf durch Lärm aus Gewerbe und Industrie .....                              | 279 |
| 10.1.                                                                   | Belastigung im Schlaf durch Lärm von Gewerbe und Industrie und<br>Katastralgemeinden .....    | 280 |
| 10.2.                                                                   | Belastigung im Schlaf durch Lärm von Gewerbe und Industrie und<br>ausgewählte Parameter ..... | 281 |
| 11.                                                                     | Belastigung durch Autobahnlärm im Schlaf .....                                                | 282 |
| 11.1.                                                                   | Belastigung im Schlaf durch Autobahnlärm und Autobahnlärmelastigung .....                     | 283 |
| 11.2.                                                                   | Belastigung im Schlaf durch Autobahnlärm und Katastralgemeinden.....                          | 284 |
| 11.3.                                                                   | Belastigung im Schlaf durch Autobahnlärm und einzelne Parameter.....                          | 284 |
| <b>Lärmcoping .....</b>                                                 | <b>287</b>                                                                                    |     |
| 1.                                                                      | Überblick und Summenscore .....                                                               | 287 |
| 2.                                                                      | Instrumentelles Lärmcoping .....                                                              | 288 |
| 2.1.                                                                    | Instrumentelles Lärmcoping und ausgewählte Parameter .....                                    | 288 |
| 3.                                                                      | Emotionales Lärmcoping .....                                                                  | 289 |
| 3.1.                                                                    | Emotionales Lärmcoping und Lärmelastigung .....                                               | 289 |
| 3.2.                                                                    | Emotionales Lärmcoping und ausgewählte Parameter .....                                        | 291 |
| 4.                                                                      | Politisches Lärmcoping .....                                                                  | 292 |
| 4.1.                                                                    | Politisches Lärmcoping und ausgewählte Parameter .....                                        | 292 |
| 5.                                                                      | Summenscore Lärmcoping und ausgewählte Parameter .....                                        | 293 |
| 6.                                                                      | Summenscore Lärmcoping und Lärmelastigung.....                                                | 295 |
| <b>Empfundene Zu- oder Abnahme des Lärms in Innsbruck .....</b>         | <b>298</b>                                                                                    |     |
| 1.                                                                      | Lärmelastigungsveränderung im Überblick .....                                                 | 298 |
| 2.                                                                      | Lärmelastigungsveränderung und ausgewählte Parameter .....                                    | 298 |
| 3.                                                                      | Lärmelastigungsveränderung und Lärmelastigung .....                                           | 300 |
| <b>Einschätzung der Auswirkungen von Lärm auf die Gesundheit .....</b>  | <b>302</b>                                                                                    |     |
| 1.                                                                      | Auswirkungen von Lärm im Überblick .....                                                      | 302 |
| 2.                                                                      | Auswirkungen von Lärm und ausgewählte Parameter .....                                         | 303 |
| <b>Bekanntheit der Umgebungslärmkarten .....</b>                        | <b>305</b>                                                                                    |     |
| <b>Einschätzung des Lärmniveaus im Städtevergleich .....</b>            | <b>306</b>                                                                                    |     |
| 1.                                                                      | Lärmniveau im Städtevergleich im Überblick.....                                               | 306 |
| 2.                                                                      | Lärmniveau im Städtevergleich und einzelne Parameter .....                                    | 307 |
| <b>Einschätzung des eigenen Lärmbeitrags .....</b>                      | <b>310</b>                                                                                    |     |
| 1.                                                                      | Eigener Lärmbeitrag im Überblick .....                                                        | 310 |
| 2.                                                                      | Eigener Lärmbeitrag und demographische Parameter.....                                         | 311 |
| 3.                                                                      | Eigener Lärmbeitrag und Mobilitätsverhalten.....                                              | 311 |
| <b>Einschätzung der störendsten Lärmquelle in Innsbruck .....</b>       | <b>313</b>                                                                                    |     |
| 1.                                                                      | Störendste Lärmquelle im Überblick.....                                                       | 313 |
| 2.                                                                      | Störendste Lärmquelle und demographische Parameter .....                                      | 313 |
| 3.                                                                      | Störendste Lärmquelle und ausgewählte Parameter .....                                         | 314 |
| 4.                                                                      | Störendste Lärmquelle und Lärmelastigung .....                                                | 315 |
| 5.                                                                      | Störendste Lärmquelle und Lärmelastigung .....                                                | 317 |
| <b>Sinnhaftigkeit von Maßnahmen zur Lärmreduktion in Innsbruck.....</b> | <b>319</b>                                                                                    |     |



|    |                                                                           |     |
|----|---------------------------------------------------------------------------|-----|
| 1. | Überblick Sinnhaftigkeit von Lärmreduktionsmaßnahmen.....                 | 319 |
| 2. | Sinnhaftigkeit von Lärmreduktionsmaßnahmen und ausgewählte Parameter..... | 319 |
| 3. | Sinnhaftigkeit von Lärmreduktionsmaßnahmen und Lärmbelastung .....        | 321 |
| 4. | Sinnhaftigkeit von Lärmreduktionsmaßnahmen und Lärmbelästigung.....       | 322 |
| 5. | Einzelmaßnahmen zur Lärmreduktion in Innsbruck .....                      | 324 |

## **VERZEICHNISSE..... 326**

|                             |     |
|-----------------------------|-----|
| Abkürzungsverzeichnis ..... | 326 |
|-----------------------------|-----|

|                           |     |
|---------------------------|-----|
| Tabellenverzeichnis ..... | 329 |
|---------------------------|-----|

|                             |     |
|-----------------------------|-----|
| Abbildungsverzeichnis ..... | 334 |
|-----------------------------|-----|

## **ANHANG..... 342**

|                                                       |     |
|-------------------------------------------------------|-----|
| Anhang 1: Deskriptive Statistik der Befragungen ..... | 342 |
|-------------------------------------------------------|-----|

|                                                      |     |
|------------------------------------------------------|-----|
| Anhang 2: Häufigkeitsstatistik der Befragungen ..... | 345 |
|------------------------------------------------------|-----|

|                 |     |
|-----------------|-----|
| Impressum ..... | 368 |
|-----------------|-----|

## EINLEITUNG

### Lärm als Herausforderung

Die Belastung/Belästigung durch Lärm ist die am häufigsten wahrgenommene Form der Umweltbelastung und gleichzeitig eines der meistverdrängten Umweltprobleme überhaupt.

Speziell im alpinen urbanen Raum stellt Lärm die Entscheidungsträger vor immer größere Herausforderungen. Dabei fehlt es nicht primär an wissenschaftlichen Grundlagen, sondern schlicht an umfassenden, nachvollziehbaren, stabilen Daten.

Das Pilotprojekt Gesamtlärbetrachtung Innsbruck hat sich zum Ziel gesetzt, erstmals eine repräsentative, nachvollziehbare Datengrundlage für die Beurteilung der Gesamtbelastung und –Belästigung der Innsbrucker Stadtbevölkerung zu schaffen.

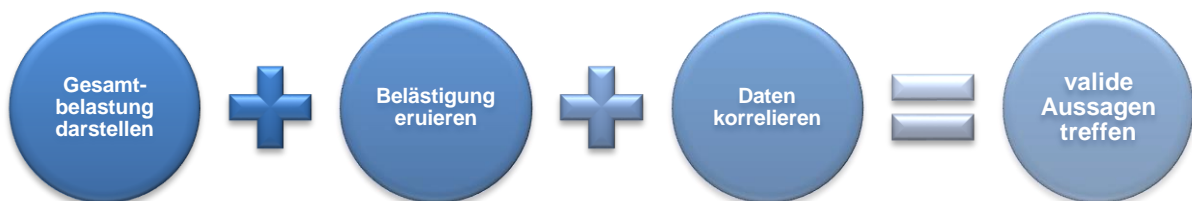

# Projektpartner

## 1. Leitung

|                                          |                                       |
|------------------------------------------|---------------------------------------|
| <b>Projektleitung / Gesamtlärmdaten:</b> | DIPL.-HTL-ING. MAG. CHRISTOPH LECHNER |
| <b>Befragungen / Auswertungen:</b>       | MAG. DR. DAVID SCHNAITER              |

## 2. Partner (alphabetisch)

### **Amt der Tiroler Landesregierung:**

|                                          |                             |
|------------------------------------------|-----------------------------|
| – Emissionen Sicherheitstechnik Anlagen: | ING. ROLAND GOGL            |
| – Landessanitätsdirektion:               | DR. MED. KARL HEINZ FISCHER |
| – Raumordnung:                           | DI ROBERT ORTNER            |
| – Verkehr und Straße:                    | DI DR. CHRISTIAN MOLZER     |
| – Verkehrsplanung:                       | DI DR. ALFRED LINTNER       |

**Anrainerschutzgemeinschaft Innsbruck Airport:** DI MANFRED RÖNER

**Asfinag Alpenstrassen:** DI (FH) KLAUS GSPAN

**Innsbruck Airport:** DI MARCO PERNETTA

**Österr. Arbeitsring für Lärmbekämpfung** DI WOLFGANG GRUBER

**Österr. Bundesbahnen:** ING. CHRISTOPH SCHMID

**Stadtmagistrat Innsbruck:** DI DR. REINHARD FISCHER

Die genannten Infrastrukturträger (in alphabetischer Reihenfolge) *Autobahnen- und Schnellstraßen-Finanzierung-Aktiengesellschaft*, *Österreichische Bundesbahnen Holding AG*, *Tiroler Flughafenbetriebsgesellschaft m.b.H.* haben neben der Bereitstellung von Verkehrsdaten ebenso wie das *Land Tirol*, die *Stadt Innsbruck* und der *Österreichische Arbeitsring für Lärmbekämpfung* auch finanzielle Beiträge zur Realisierung des Pilotprojektes Gesamtlärmbetrachtung Innsbruck geleistet und damit dieses Projekt überhaupt erst ermöglicht.

Die Konzeptionierung und Erstellung des Studiendesigns, die Lärmdatenausbreitungsberechnungen, die Entwicklung des Fragebogens, die Befragungsdurchführung und die zusammenführende Berichterlegung etc. wurden jedoch ohne jegliche Einflussnahme der genannten Infrastrukturträger ausgearbeitet und durchgeführt. Die Projektpartner wurden von der Projektleitung über die geplanten Inhalte in wiederkehrenden gemeinsamen Besprechungen informiert, es kam allerdings zu keinem Zeitpunkt und in keinsten Weise zu einer inhaltlichen Einflussnahme der Projektpartner, denen auch kein Mitspracherecht in der Planung, Ausführung und Berichterlegung eingeräumt wurde. Durch dieses Vorgehen konnte von Seiten der Projektleitung eine vollkommen unabhängige Projektabwicklung sichergestellt und jeglicher Interessenskonflikt ausgeschlossen werden.

# Die Stadt Innsbruck

## 1. Stadtgebiet und Katastralgemeinden

Das Stadtgebiet von Innsbruck umfasst 9 Katastralgemeinden: Innsbruck, Wilten, Pradl, Hötting, Mühldau, Amras, Arzl, Vill und Igls, die sich wiederum in Stadtteile und Bezirke gliedern.

Abbildung 1: Katastralgemeinden Innsbruck

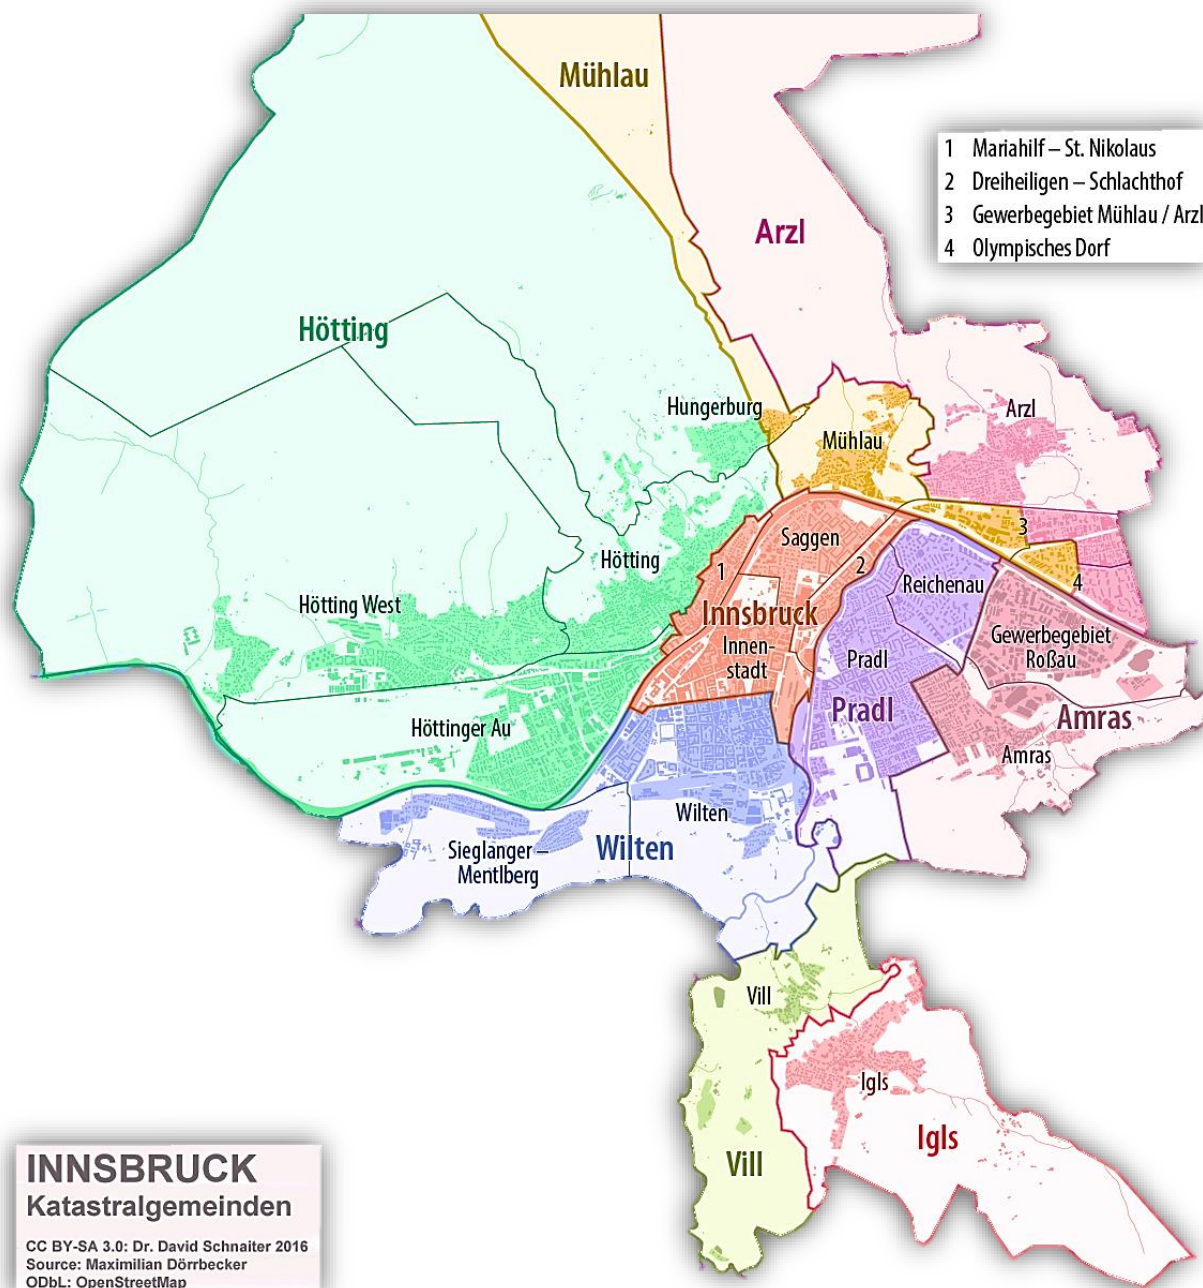

## 2. Demographie

Um eine repräsentative und homogene Verteilung der zu befragenden Personen zu erreichen, wurde in einem ersten Schritt eine soziodemographische Populationsanalyse auf Basis der Datensätze des *Zentralen Melderegisters*, des *Stadtmagistrats Innsbruck (Abtlg. Statistik und Berichtswesen)*, der *Statistik Austria* und den statistischen Publikationen des *Amtes der Tiroler Landesregierung* vorgenommen.

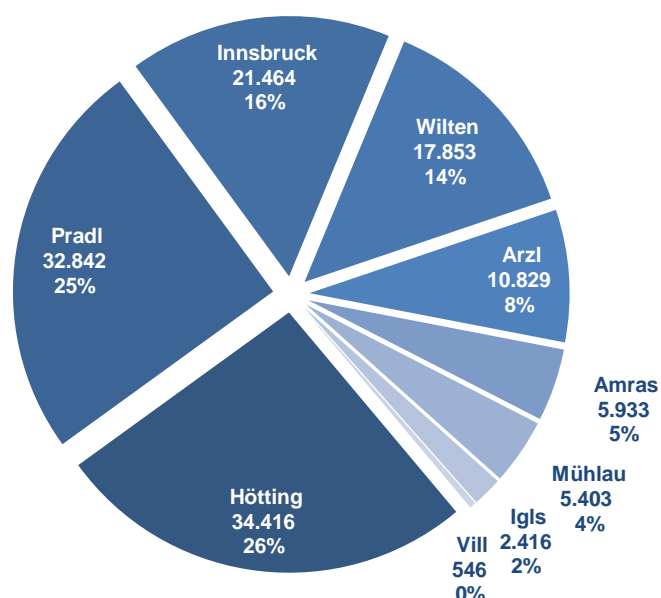

**Abbildung 2: Einwohnerschaft Innsbrucks mit Hauptwohnsitz nach Katastralgemeinden (2016)**

Mit Stichtag 01.01.2016 lebten im Stadtgebiet von Innsbruck 131.702 Einwohnerinnen und Einwohner mit Hauptwohnsitz (Nebenwohnsitzquote 14,7%), die sich auf die 9 Katastralgemeinden verteilen.

Auf einen Blick lassen sich die wichtigsten demographischen Parameter der Landeshauptstadt Innsbruck wie folgt darstellen:

**Abbildung 3: Demographische Strukturen in Innsbruck auf einen Blick**

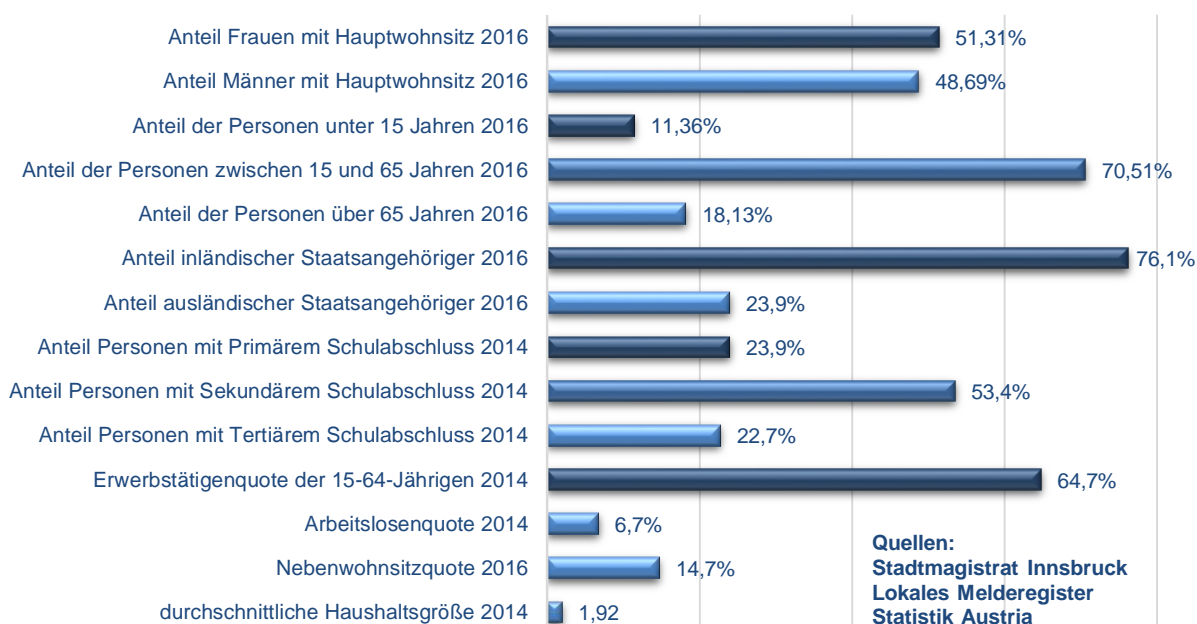

Für die demographische Repräsentativität von Befragungen sind vor allem die beiden Parameter Alter und Geschlecht von besonderem Interesse, aber auch die durchschnittliche Haushaltsgröße, die Er-

werbstätigenquote<sup>1</sup> und die Verteilung auf die Bildungsschichten, sind relevante Informationen für die Auswertung und Interpretation der Befragungsdaten.

**Abbildung 4: Alterspyramide der Bevölkerung von Innsbruck nach Geschlecht 2016**

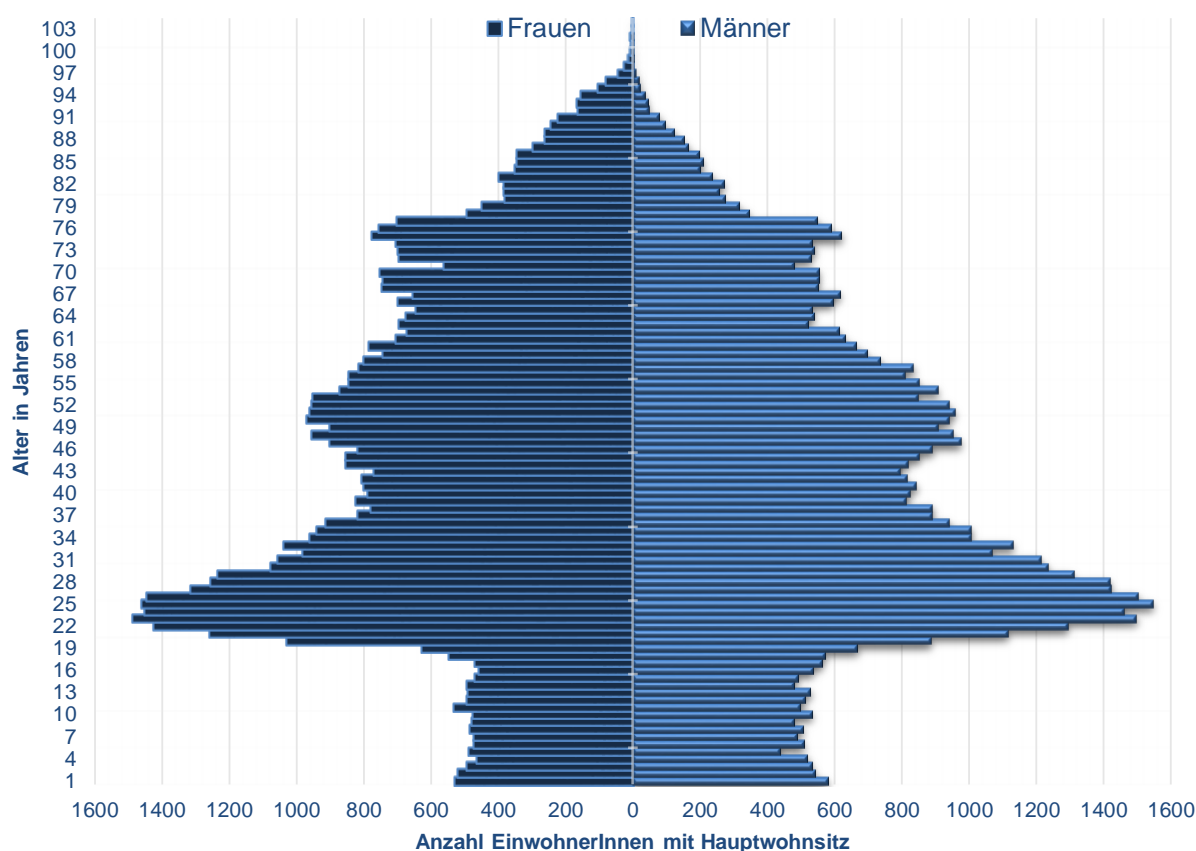

**Abbildung 5: Bevölkerung von Innsbruck nach höchstem erreichtem Schulabschluss (2014)**

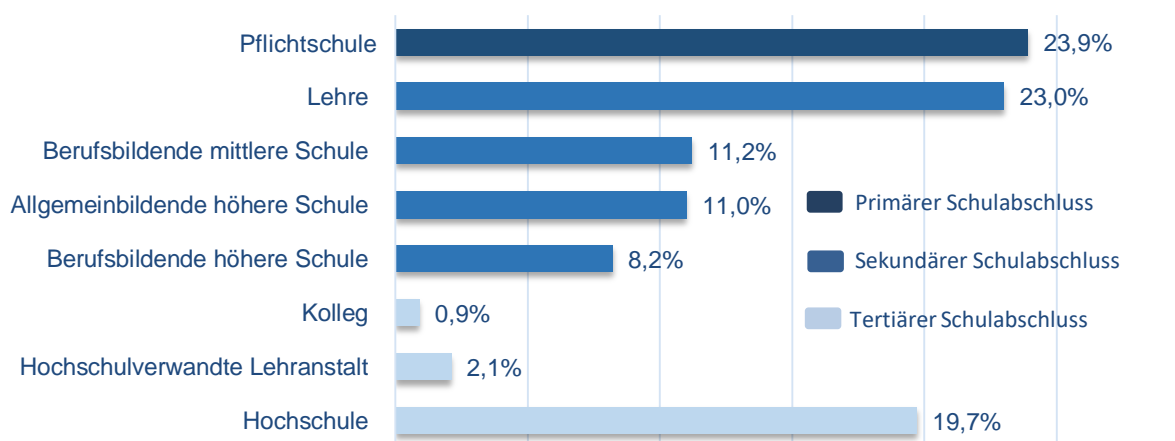

Im Kapitel *Die Stichprobe* werden die einzelnen Parameter detailliert dargestellt und das verwendete Adress-Cluster-Sampling näher erläutert.

<sup>1</sup> Erwerbstätigenquote: Der Erwerbsstatus basiert auf der ILO-Klassifizierung (International Labour Organisation) und untergliedert die Wohnbevölkerung in Erwerbspersonen (erwerbstätig, arbeitslos) und Nicht-Erwerbspersonen (Personen unter 15 Jahren; Personen mit Pensionsbezug; Schülerinnen und Schüler, sowie Studierende 15 Jahre und älter; sonstige Nicht-Erwerbspersonen).



# LÄRMDATEN

## Grundbegriffe Lärm

### 1. Schalltechnische Grundbegriffe

Eine Auflistung samt Kurzerläuterungen für die schalltechnischen Grundbegriffe findet sich im Abkürzungsverzeichnis.

### 2. Ausbreitungsberechnungen

Schallausbreitungsberechnungen sind eine Methode zur Ermittlung von vergangenen, bestehenden und zukünftigen Schalleinwirkungen auf rechnerischer Basis. Auf der Ebene großräumiger Belastungen werden dabei Ingenieurverfahren angewandt, welche auch im Verwaltungsbereich verbindlich sind.

Die Berechnung erfolgt dabei grundsätzlich für Dauerschallpegel und den daraus abgeleiteten Indizes wie  $L_{den}$  und  $L_{night}$ . Grundsätzlich besteht sie aus zwei Teilen, der Ermittlung der Emission und die Transmission. Bei der Emission werden Durchschnittswerte einzelner Quellen aus einer Vielzahl von Messungen eingesetzt und mit den für die Höhe maßgebenden Eigenschaften belegt. Diese sind bei Straßenfahrzeugen die Art des Fahrzeuges, die Geschwindigkeit, der Fahrbahnbelag und die Steigung der Straße. Durch die Mittelung des Berechnungsergebnisses heben sich auch die Schwankungen der Einzelereignisse auf. Je länger der Mittelungszeitraum und je höher die Anzahl der Vorbeifahrten, desto geringer sind die Abweichungen zwischen einer zeitgleichen Messung und Berechnung. Dass Einzelereignisse vom Mittelwert immer abweichen können, in positiver wie in negativer Richtung entspricht der allgemeinen Lebenserfahrung.

Bei der Transmission wird ein physikalisches Modell verwendet, dessen primäre Lösung darauf beruht, dass die Intensität des Schalls mit zunehmendem Abstand definiert sinkt. Weiters werden Reflexionen, Abminderungen durch Dämpfungen und Abschirmungen, Absorption in der Atmosphäre und meteorologische Effekte berücksichtigt. Letztere werden erst in größeren, 100 m übersteigenden Distanzen wirksam. Im städtischen Bereich werden diese durch die Nähe der Schallquellen kaum schlagend. Die Besonderheit der Ausbreitungsberechnung in Österreich ist die Annahme ausbreitungsgünstiger Meteorologie d. h. tendenziell höherer Immissionspegel. Im städtischen Bereich sind diese aber im Vergleich zum meteorologischen Durchschnitt im Zehntel-Dezibel-Bereich.

### 3. GIS-Darstellung

Die Darstellung von Schallausbreitungsberechnungen kann durch zwei Methoden erfolgen:

**Rasterlärmkarte:** flächenhafte Darstellung der Schallimmission, gegeben durch den energieäquivalenten Dauerschallpegel in dB, in einem Plan.

**Gebäudelärmkarte:** Abbildung der Pegel an den Fassaden eines Gebäudes in einer (zumeist 4m) oder mehreren Ebenen eines Gebäudes und Abwicklung von Einzelpunkten entlang der Fassadenelemente. In Anhang VI der Richtlinie 2002/49/EG ist festgelegt, dass die Anzahl der Personen, die in Gebäuden wohnen, so festzustellen ist, dass sie dem lautesten Fassadenpunkt in Bezug auf die Werte der Lärmindizes  $L_{den}$  und  $L_{night}$  zuzurechnen sind. Dieser Vorgang dient auch dem Vergleich mit Dosis-Wirkungskurven, die unter denselben Annahmen getroffen werden.

# Verwendete Lärmdaten

## 1. Die Ausgangslage

Die Erstellung von Lärmkarten (Raster- und Gebäudelärmkarten) stellt einen erheblichen personellen und Ressourceneinsatz dar. Das Amt der Tiroler Landesregierung, Abteilung ESA, ist für die Erstellung von strategischen Lärmkarten zuständig. In periodischen Abständen von fünf Jahren sind Umgebungslärmkarten zu überprüfen und erforderlichenfalls neu zu erstellen. Die ständige Entwicklung der Verkehre aber auch der Bebauung sowie das stete Bestreben, die Genauigkeit der Lärmkarten zu verbessern macht de facto die Neuberechnung alle fünf Jahre notwendig. Dabei werden alle Landesstraßen mit einem Verkehrsaufkommen über 3 Mio KFZ/a kartiert, zusätzlich der gesamte Straßenverkehr im Ballungsraum Innsbruck (zu dem auch die Gemeinden Völs und Rum zählen). Über gesonderte Beauftragung des Bundes erfolgen weiters Berechnungen des Schienenverkehrs im Ballungsraum und kombinierte Straßenlärmmarten mit dem ASFINAG Straßennetz A und S für das gesamte Landesgebiet. Die verpflichtende periodische Berechnung war 2017 wieder fällig, die Datengrundlage dazu wurde bundeseinheitlich mit dem Jahr 2015 festgelegt.

Für die Gesamtlärmbetrachtung Innsbruck ergeben sich durch diesen Umstand erhebliche Synergien. Die gesamte Datengewinnung und –Aufbereitung konnte in aktueller Form genutzt werden. Dies betraf die gesamte Modellbildung des Stadtgeländes, der Bebauung, der statistischen Bevölkerungsdaten und der Schallschutzmaßnahmen. Es bedurfte daher nur der zusätzlichen Bearbeitungsschritte mit Modellierung und Schallausbreitungsberechnung der ÖBB-Strecken in Innsbruck sowie des Flugverkehrs, welcher neben der Gesamtlärmbetrachtung auch zur Evaluierung der Fluglärmmessstellen und der Radardatenerfassung diente.

## 2. Berechnung als geeignetes Verfahren

Der Bestimmung der Exposition kommt in dieser wie auch in vergleichbaren Studien eine besondere Bedeutung zu. Dabei kommt es darauf an, die gewählten Kennzahlen für die Exposition bestmöglich im Sinne von „mit den kleinsten Unsicherheiten behaftet“ abzubilden. Für diese Studie wurde entschieden, die Exposition mittels der europäisch festgelegten und international anerkannten Lärmindizes für die allgemeine Lärmbelastung  $L_{den}$  und für die Schlafstörung  $L_{night}$  abzubilden.

Grundsätzlich stehen für die Ermittlung der Schalleinwirkungen 3 Möglichkeiten zur Verfügung: Messen, Rechnen und Schätzen. Letzteres Verfahren wird zumeist eher belächelt, findet aber gerade in sehr weitläufigen Studien und als Post hoc-Analysemethode immer noch Anwendung. Im allgemeinen genießt die Messung in der Bevölkerung ein wesentlich größeres Vertrauen, dieses äußert sich auch in der jahrelangen Judikatur, welche postuliert, dass grundsätzlich der Messung der Vorzug zu geben ist. Bei näherer Betrachtung erweist sich die Methode der Messung jedoch bei weitem nicht als universell anwendbare bessere Ermittlungsmethode. Zur Bestimmung der europäischen Lärmindizes sind Durchschnittsbetrachtungen über 1 Jahr notwendig. Diese gelten für den lautesten Punkt der Fassade eines jeden Gebäudes. Die Exposition ist notwendiger Weise für alle Quellen des Verkehrslärms getrennt zu bestimmen. Die Messung schöpft vergleichsweise genaue Ergebnisse, deren Gültigkeit sich aber auf den Ort und den Zeitraum der Erfassung beschränkt. Aufgezeichnet werden hier

alle einzelnen Geräusche zusammen, selbst wenn diese als Störgeräusche zu qualifizieren wären und dadurch das Messergebnis verfälscht wird.

Die Berechnung stützt sich auf eine Vielzahl von Emissionsdatenmessungen, welche den Durchschnitt von einzelnen Fahrzeugen, sei es auf der Schiene, der Straße oder in der Luft sehr gut annähern. Die Transmissionseigenschaft ist Physik und die mathematische Umsetzung der Gesetzmäßigkeiten. Diesbezüglich ist kein Grund für Unzulänglichkeiten der Berechnung angebracht, vorausgesetzt das Modell wurde mit Sorgfalt, akustischer Expertise und realitätsnah erstellt. Einen unschlagbaren Vorteil zeigt die Berechnung gegenüber der Messung auf jeden Fall: Im Zuge der vorliegenden Untersuchung wurde an den Fassadenpunkten über 280.000-mal der Jahresdurchschnitt für die unterschiedlichen Quellen berechnet. Eine Anzahl, die einer messtechnischen Verfassung nicht zugänglich ist.

All diese Auswahlgründe und Argumente sprechen für die Berechnung, und zwar ausschließlichen Berechnung der Schallexposition an den betroffenen Fassaden, da Messungen weder die separierte Erfassung der Lärmquellen leisten können noch in Summe für die expositionsrichtige Darstellung leistbar im Sinne des zeitlichen und finanziellen Aufwandes sind.

### 3. Umgebungslärmkarten

#### 3.1. Umfang

Die Bearbeitung zum Projekt *Gesamtlärbetrachtung Innsbruck* umfasst die Berechnung und Darstellung von strategischen Umgebungslärmkarten, sowie die Ermittlung von betroffenen Einwohnerinnen und Einwohnern für die Lärmquellen Straße, Schiene und Flug im Stadtgebiet Innsbruck in einer Immissionshöhe von 4 m über Gelände.

Die Berechnung erfolgte unter Anwendung einer Software für die Schallausbreitung. Hierbei wurde ein Berechnungsmodell gebildet, in das alle für die weitere Berechnung relevanten Daten einfließen. Die größten Datenblöcke bilden das Gelände, sämtliche Gebäude (Immissionsorte) und die jeweiligen Emissionen.

#### 3.2. Angaben zur eingesetzten Software

Programm: SoundPLAN  
Version: 7.4  
Hersteller: Braunstein + Berndt GmbH  
D-71522 Backnang  
Deutschland

### 3.3. Angaben zur Modellbildung

#### 3.3.1. Beschreibung der Eingangsdaten Gelände

Das Geländemodell gründet auf einer aus der Laser-Scan-Verortung resultierenden 3D-Punktwolke, welche nach definierten Anforderungen für das vorliegende Projektgebiet aufbereitet wurde. Diese Laser-Scan-Verortung wurde im Auftrag des Landes in den Jahren 2012 bis 2015 durchgeführt.

Als maximaler Vertikalabstand zwischen zwei Höhenpunkten wurde ein Abstand von 0,1 m gewählt. Zudem wurde ein maximaler Horizontalabstand von 10 m berücksichtigt, um bei ausgedehnten ebenen Flächen ebenfalls ausreichend Höhenpunkte zu erhalten.

#### 3.3.2. Beschreibung der Eingangsdaten Gebäude

Bei der Auswertung der Gebäude wurde das durch die Laser-Scan-Verortung festgestellte Gebäudepolygon in seinem Umfang um einen Meter deshalb reduziert, damit ein etwaiger Bodestich der Laser-Scan-Verortung eliminiert wird. Ein solcher würde sich maßgeblich auf die Berechnung der Gebäudehöhe auswirken.

Um die Höhe des Gebäudes zu erhalten, wurde der arithmetische Mittelwert aus Höhenminimum und Höhenmaximum der Stiche innerhalb des reduzierten Gebäudepolygons gebildet.

In weiterer Folge wurde jedes Gebäudepolygon mit einer eindeutigen Adresse behaftet. Bei Gebäuden mit mehreren Adressen (z.B. Wohnanlagen) ergaben sich gemäß der Anzahl der Adresscodes zusätzliche Gebäudepolygone, welche geometrisch vollständig ident sind.

Die Bestimmung der betroffenen Einwohner erfolgte mittels des Verschnitts der Adresse mit den seitens des Umweltbundesamtes zur Verfügung gestellten AGRWII-Daten. So wurde jedem Gebäudepolygon im Vorfeld der Modellierung als zusätzliches Attribut die Einwohner- sowie Wohnungsanzahl zugeordnet.

Alle Gebäude im Modell weisen somit ihre vollständige, tatsächliche Adresse samt der Anzahl an Wohnungen und Bewohnerinnen und Bewohnern auf.

#### 3.3.3. Beschreibung der Eingangsdaten Lärmschutz

Die Lärmschutzwände im Bereich der Landes- und Gemeindestraßen wurden im Zeitraum 2014 bis 2015 vor Ort erhoben. Lärmschutzwände die in den Zuständigkeitsbereich der ASFINAG bzw. den ÖBB fallen, wurden von diesen im Zuge des Datenaustausches im Jahr 2016 zur Verfügung gestellt.

Den Nachweis der Absorptionswerte der Lärmschutzwände lieferten die Prüfzeugnisse der jeweiligen Hersteller.

#### 3.3.4. Beschreibung der Eingangsdaten Bodendämpfung

Die generelle Bodendämpfung wurde mit  $G = 0,8$  angenommen. Befestigte Flächen wie z.B. Fahrwege oder Gewässer wurden mit  $G = 0,0$  modelliert.

### *3.3.5. Anzahl der berücksichtigten Reflexionen und Rasterweite*

Bei der Berechnung wurden Reflexionen 1. Ordnung berücksichtigt. Die Rasterweite betrug 10 m x 10 m.

### *3.3.6. Angaben zur grenzüberschreitenden Betrachtung von Lärmquellen*

Eine grenzüberschreitende Betrachtung von Lärmquellen wurde durch eine aus schalltechnischer Sicht ausreichend über das Stadtgebiet hinweglaufende Modellierung der jeweiligen Lärmquelle gewährleistet.

## **4. Verkehrslärm**

### **4.1. Straßenverkehrslärm**

#### *4.1.1. Angaben zur Erhebung der Emissionsquellen*

Sowohl das Straßennetz im Projektgebiet als auch die Verkehrszahlen wurden seitens der Stadt Innsbruck zur Verfügung gestellt und gehen auf das Jahr 2015 zurück.

Bei den beiden Autobahnen wurden seitens der ASFINAG im Jahr 2016 im Zuge eines Datenaustausches die Emissionsschallpegel  $L_{A,eq}$  übermittelt. Dies sind bereits die auf den Verkehrsdaten der Autobahn basierenden schalltechnischen Kenngrößen.

#### *4.1.2. Angaben zu den verwendeten Geschwindigkeiten*

Als Geschwindigkeiten wurden entsprechend der ÖAL-Richtlinie 36 Blatt 2 die jeweils erlaubten Höchstgeschwindigkeiten modelliert.

#### *4.1.3. Beschreibung der Eingangsdaten Straßenemissionen*

Die einzelnen Straßenzüge wurden auf das Geländemodell aufgesetzt und in weiterer Folge in dieses eingerechnet. Die Verkehrsstärken, Geschwindigkeiten und Fahrbahnoberflächen wurden als Parameter hinterlegt. Ebenso wurden sämtliche Brücken sowie die Tunnel im Bereich der Autobahnen berücksichtigt.

Als Berechnungsvorschrift für die Emission diente die RVS 04.02.11.



## 4.2. Schienenverkehrslärm

### 4.2.1. Angaben zur Erhebung der Emissionsquellen

Sowohl das Schienennetz im Projektgebiet als auch die Verkehrszahlen klassifiziert nach den einzelnen Zugarten wurden seitens der ÖBB im Jahr 2016 zur Verfügung gestellt.

### 4.2.2. Angaben zu den verwendeten Geschwindigkeiten

Als Geschwindigkeit wurde das Minimum aus zulässiger Höchstgeschwindigkeit im jeweiligen Streckenabschnitt und maximaler Höchstgeschwindigkeit der jeweiligen Zugart herangezogen.

### 4.2.3. Beschreibung der Eingangsdaten Schienenemissionen

Die einzelnen Schienenstrecken wurden auf das Geländemodell aufgesetzt und in weiterer Folge in dieses eingerechnet. Die Verkehrsstärken und Geschwindigkeiten wurden als Parameter hinterlegt. Ebenso wurden sämtliche Brücken sowie die Tunnels berücksichtigt. Als Berechnungsvorschrift für die Emission diente die ON-Regel 305011.

## 4.3. Fluglärm

### 4.3.1. Angaben zur Erhebung der Emissionsquellen

Durch die radarunterstützte Flugüberwachung der Austro Control GmbH werden alle Flüge vom und zum Flughafen Innsbruck mittels einer Flugspur beschrieben. Diese Flugspur beschreibt die x- und y-Position des Fluges, aber auch die Flughöhe und Geschwindigkeit des Flugzeuges. Abseits dieser Radardaten sind jedem Flug weitere Informationsdaten wie z.B. die Flugzeugtype hinterlegt. Sowohl Radardaten als auch Fluginformationsdaten werden von der Austro Control GmbH laufend im Rahmen der Fluglärmüberwachung dem Land Tirol übermittelt. Für die Gesamtlärbetrachtung Innsbruck wurden alle Flüge des Jahres 2015 herangezogen.

### 4.3.2. Beschreibung der Eingangsdaten Flugemissionen

Die Flugbewegungen wurden entsprechend ihren Flugspuren im Modell abgebildet. Flüge, die nicht dem Flughafen zuzuordnen sind (Überflüge, Hubschrauberflüge) wurden vorab herausgefiltert. Anhand der Flugzeugtype und des Steigprofils wurden die Emissionen nach der Richtlinie ECAC Doc 29 3<sup>rd</sup> Edition berechnet. Nicht modelliert werden konnten somit die Flugbewegungen der Rettungshubschrauber vom und zum Landeskrankenhaus Innsbruck. Diese stellen besonders in den Wintermonaten im Tageszeitraum eine erhebliche Anzahl an Flügen und verursachen relevante Lärmimmissionen im Stadtgebiet von Innsbruck. Allerdings sind bis dato keine exakten Flugbewegungs- respektive Lärmdaten verfügbar, um diese in die Flugverkehrslärmausbreitungsberechnungen aufnehmen zu können.

#### 4.4. Betroffenenauswertung - Bestimmung der betroffenen Einwohner

Die im weiteren Verlauf berechneten Gebäudelärmkarten lieferten die Ausweisung der betroffenen Einwohnerinnen und Einwohner, sowie der Wohnungen. Bei der Berechnung der Gebäudelärmkarten wurde an jeder Fassade mit Länge >1,5 m in deren Mitte ein Immissionspunkt auf Höhe 4 m über Gelände gesetzt. Es erfolgten getrennte Rechenläufe für die drei unterschiedlichen Emissionsarten.

Als Ergebnis wurde für jede einzelne Adresse der lauteste Fassadenpegel für Straße, Schiene und Flug ausgewiesen. Die Zuordnung der Einwohnerinnen und Einwohner und Wohnungen erfolgte zu jeweils diesem Pegel.

### 5. Nicht verkehrsinduzierter Lärm

Gesamtlärm im weiteren Sinn inkludiert nicht nur Geräusche von Verkehrsträgern sondern auch aus anderen Quellen. Es ist dies im Speziellen Lärm aus Gewerbe und Industrie, aus Gaststätten und von Passanten, von Baustellen und aus der Nachbarschaft. Die flächendeckende Bestimmung von Schallquellen erfordert das Vorhandensein von entsprechenden Eingangsdaten, welche in vielen Fällen nicht oder nur mit einem hohen Aufwande erhoben werden können. Eine Bestimmung der Exposition in Form der in Dezibel ausgedrückten Schallbelastung erfolgte nicht. Im Fragebogen werden diese Quellen dennoch in zweierlei Hinsicht berücksichtigt. Einerseits wird die Ausgesetzttheit zu diesen Quellen analog zum Verkehrslärm befragt, andererseits erfolgt ebenso die Abfrage der Belästigung und subjektiven Schlafstörung. Damit ist eine Auswertungsmöglichkeit auch für nichtverkehrsinduzierten Lärm möglich.

### 6. Messung in Kranebitten

#### 6.1. Lärmmessung

Wie weiter oben ausgeführt, genießt die Messung allgemein ein höheres Vertrauen als die Berechnung. Auf ausdrücklichen Wunsch eines Projektpartners wurde an einem ausgewählten Messpunkt in Kranebitten eine temporäre Dauermessstelle installiert, um einen Vergleich gerade in Bezug auf Fluglärm durchführen zu können. Der Messpunkt befand sich auf Gst.Nr. 2541/3, KG Hötting, ca. 25m östlich des Gebäudes Harterhofweg 99 und ca. 20m südlich der Weggabelung. Die Mikrofonhöhe betrug 4m über Gelände. Die Ergebnisse der Lärmmessung repräsentieren einen Durchschnittstag im Zeitraum von Montag, den 23.01.2017 10:42 Uhr bis Sonntag, den 29.01.2017 24:00 Uhr.

Die Messergebnisse wurden maßgeblich vom Flugverkehrsaufkommen am Flughafen Innsbruck, aber auch dem Straßenverkehr entlang der A12 Inntalautobahn und der B171 Tiroler Straße beeinflusst.

**Tabelle 1: Messergebnisse temporäre Dauermessstelle Kranebitten (alle Quellen)**

|                            |         |
|----------------------------|---------|
| Tag (06:00 – 19:00 Uhr):   | 60,5 dB |
| Abend (19:00 – 22:00 Uhr): | 57,6 dB |
| Nacht (22:00 – 06:00 Uhr): | 47,8 dB |

Aus diesen Messergebnissen wurden die Flugbewegungen extrahiert und ausschließlich die Schallimmissionen des Flugverkehrs ermittelt, damit ein Vergleich mit den Berechnungsergebnissen genau für diesen Zeitabschnitt durchgeführt werden konnte. Die Teilpegel der einzelnen Quellen sind in folgender Tabelle aufgelistet:

**Tabelle 2: Teillärmpegel temporäre Dauermessstelle Kranebitten**

|                               | <b>Tag</b>     | <b>Abend</b>   | <b>Nacht 8h</b> |
|-------------------------------|----------------|----------------|-----------------|
| Straße                        | 58,6 dB        | 55,6 dB        | 49,7 dB         |
| Schiene                       | 39,7 dB        | 40,4 dB        | 40,0 dB         |
| Flug                          | 54,4 dB        | 47,2 dB        | 32,8 dB         |
| <b>Summe Berechnung</b>       | <b>60,0 dB</b> | <b>56,3 dB</b> | <b>50,2 dB</b>  |
| <b>Summe Messung</b>          | <b>60,5 dB</b> | <b>57,6 dB</b> | <b>47,8 dB</b>  |
| <b>Differenz Ber. – Mess.</b> | <b>-0,5 dB</b> | <b>-1,3 dB</b> | <b>2,4</b>      |

Abweichungen im oben beschriebenen Umfang von -0,5 bis 2,4 dB liegen in einem sehr guten Genauigkeitsbereich.

## 6.2. Vergleich Messung – Berechnung Fluglärm

Bei den folgenden Ergebnissen wurde sowohl bei der Lärmmessung als auch bei der Berechnung ausschließlich das Flugverkehrsaufkommen am Flughafen Innsbruck berücksichtigt. Der Zeitraum beschränkt sich auf die Woche der Lärmmessung von Montag 23.01.2017 bis Sonntag 29.01.2017:

**Tabelle 3: Vergleich der Mess- mit den Berechnungsergebnissen**

|                  | <b>Tag</b>    | <b>Abend</b>  | <b>Nacht</b>  |
|------------------|---------------|---------------|---------------|
| Messung          | 59,0 dB       | 56,0 dB       | 33,8 dB       |
| Berechnung       | 58,1 dB       | 52,0 dB       | 30,4 dB       |
| <b>Differenz</b> | <b>0,9 dB</b> | <b>4,0 dB</b> | <b>3,4 dB</b> |

Die Unterschiede zwischen Messung und Berechnung im Abend- und Nachtzeitraum lassen sich auf Unschärfen in der Auswertung des Pegel-Zeit-Verlaufes der Messung (händische Zuordnung) bzw. auch auf Ungenauigkeiten der Radarspurkoordinaten zurückführen. Durch das deutlich geringere Flugverkehrsaufkommen im Abend- und Nachtzeitraum schlagen einzelne Ungenauigkeiten, das sind Abweichungen auch der Emissionsdaten der Flugzeuge nach der Berechnungsvorschrift zum tatsächlichen Emissions- und Flugverhalten wesentlich stärker durch.

Dass die Messergebnisse höher als die Berechnungsergebnisse sind, erscheint aber plausibel, da die Berechnung ausschließlich das spezifische Geräusch berücksichtigt, während bei einer Lärmmessung sämtliche Umgebungseinflüsse miterfasst werden und die Trennschärfe zwischen Fluglärmfassung und Hintergrundgeräuschen nicht exakt ist.

In Summe gibt die Berechnung in Zusammenschau mit den Dauermessstellen, welche beide radardatenbasiert die Flugereignisse korrelieren ein sehr gutes reales Belastungsbild in der Fläche, das sich auch durch weitere Messstellen nicht entscheidend verbessern lässt.

## Gesamtlärberechnung

Die Frage nach Möglichkeiten die Methoden und Evidenz von Gesamtlärberechnungen ist aktuell in der Lärmwirkungsforschung sehr umstritten. Mit der vorliegenden Gesamtlärbetrachtung in Innsbruck sollen auch Daten gewonnen werden, welche für die Erhöhung der Evidenz und die Generierung eines verbesserten Gesamtlärmmodells geeignet sind und so unterstützend wirken können. Im Rahmen des vorliegenden Projektberichtes wird aber kein neues Verfahren abgeleitet, sondern ein bestehendes Verfahren zur Anwendung gebracht.

Im *Good practice guide on noise exposure and potential health effects* der Europäischen Umweltagentur (eea technical report No 11/2010) ist ein Verfahren, basierend auf Veröffentlichungen von Henk Miedema enthalten (*Relationship between exposure to multiple noise sources and noise annoyance* J. Acoust. Soc. Am. Volume 116, Issue 2, pp. 949-957 - 2004). Auch in Deutschland wurde ein darauf aufbauendes und durchaus vergleichbares Verfahren entwickelt, welches in VDI 3722-2 beschrieben ist. Die Unterschiede dieser Verfahren untereinander sind marginal und führt die Anwendung des einen oder anderen Verfahrens nicht zu relevant unterschiedlichen Aussagen. Hervorzuheben ist, dass diese Verfahren zur Anwendung in der strategische Planung und Hotspot-Analyse gedacht sind, nicht bzw. noch nicht für die Bewertung individueller Lärmstörungen. Untersuchungen und Studien über die Beeinträchtigung durch mehrere Quellen, die darauf fokussieren, wie die betrachteten Geräuschquellenarten bewertet wurden und welche Geräuschquelle die vorherrschende innerhalb der Gesamtgeräuschsituation ist, sind schwieriger. Der Stand der Forschung ist laut VDI 3722-2 und der darin zitierten Literaturrecherche von B. Schulte-Fortkamp eindeutig: es gibt hierzu keine generelle Antwort.

Das Verfahren der VDI 3722-2 dient der Ermittlung von Kenngrößen zur Bewertung beim Einwirken unterschiedlicher Geräuschquellenarten hinsichtlich Belästigung und selbstberichteter Schlafstörungen. Das Verfahren selbst ist ein Substitutionsverfahren, das die Festsetzung einer Vergleichsgröße erfordert. Für die Wirkung kombinierter Verkehrsgeräuschquellenarten wird der Straßenverkehr herangezogen, dieser dient quasi als Referenzgeräusch zur Bewertung der relativen Belästigungs- und subjektiven Schlafstörungswirkungen. Letztendlich wird das Model der VDI 3722-2 auch deshalb zur Anwendung gebracht, da diese den in deutschsprachigem Raum gegebenen Stand der Technik darstellt. Der Stand des Wissens ist erst weiter zu verfeinern und zu vertiefen „es wird sich daher erst in Zukunft zeigen, welche Modelle zur Vorhersage einer Gesamtlärbbeeinträchtigung durch mehrere Quellenarten am besten geeignet sind“ (VDI3722-2). Dieser Stand der Technik ist auch in der zur Anwendung gelangenden Software SoundPlan 7.4 realisiert. Aus diesem weiteren Grund war dies das Mittel der Wahl, die gesamte Lärmbelastung vor allem zum Zwecke der Verteilung und verbesserten Analyse der Betroffenheiten anzuwenden.

# LÄRM IN INNSBRUCK

## Die Ist-Situation

### 1. Belastungszonen

Wie im Bereich der statistischen Aufarbeitungen noch weiter erläutert, erfolgt die Zuordnung zu Belastungszonen über das Ausmaß der Betroffenheit durch Lärm aus einzelnen Quellen. Dabei wird in die drei Kategorien „gering“, „mittel“ und „stark“ unterschieden. Die folgenden Tabellen und Grafiken geben einen Überblick über diese Belastungen getrennt nach Straßen- (hier nochmals unterteilt in Autobahn und Gesamtstraßenverkehr), Schienen- und Flugverkehr. Die Verkehrslärmbelastung der Einwohnerinnen und Einwohner von Innsbruck wird im nachfolgenden Kapitel *Verkehrslärmbelastung* beschrieben. In der nachstehenden Tabelle ist die Anzahl der belasteten Gebäude und Wohnungen nach Quellen enthalten:

**Tabelle 4:** Anzahl der belasteten Gebäude, Einwohner und Wohnungen nach Quelle

|                 |           | Gering | Mittel | Stark | Gesamt |
|-----------------|-----------|--------|--------|-------|--------|
| <b>Flug</b>     | Gebäude   | 6257   | 4886   | 807   | 11950  |
|                 | Wohnungen | 34127  | 34881  | 4303  | 73311  |
| <b>Schiene</b>  | Gebäude   | 6968   | 3709   | 1273  | 11950  |
|                 | Wohnungen | 39153  | 25901  | 8257  | 73311  |
| <b>Straße</b>   | Gebäude   | 967    | 4804   | 6179  | 11950  |
|                 | Wohnungen | 2198   | 25186  | 45927 | 73311  |
| <b>Autobahn</b> | Gebäude   | 6334   | 4868   | 748   | 11950  |
|                 | Wohnungen | 36915  | 32842  | 3554  | 73311  |

**Abbildung 6:** Überblick der Verkehrslärmbelastung nach Quelle

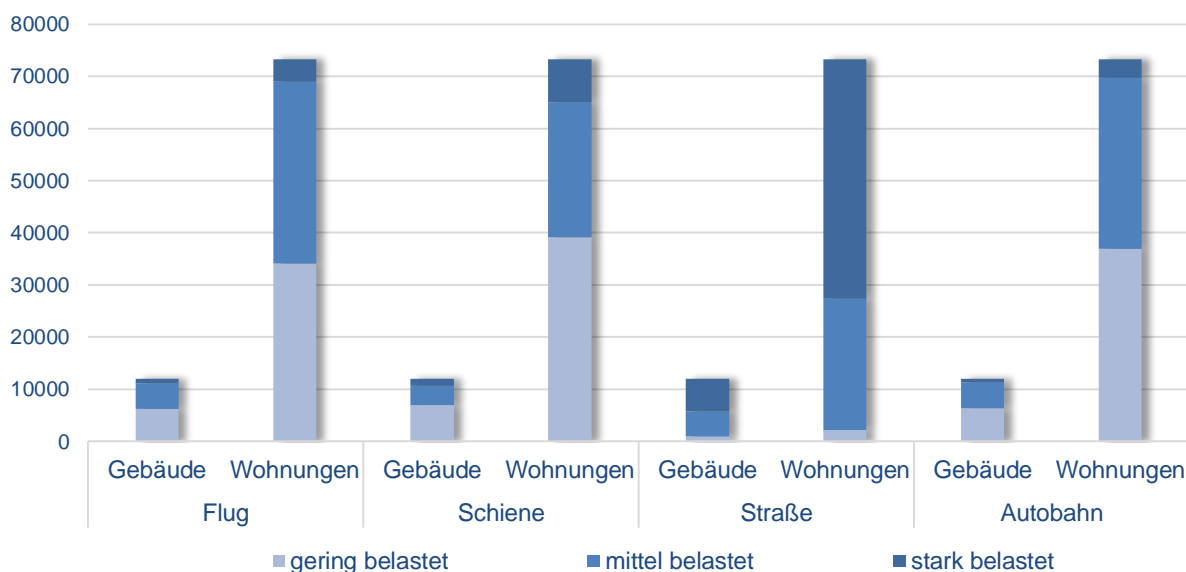

In dieser Graphik wird deutlich, dass der größte Anteil der stark belasteten Wohnungen durch den Straßenverkehr (gesamt) entsteht. Diese Aussage gilt gleichermaßen für Gebäude wie Wohnungen. Mehr als 50 % der Gebäude und 60% der Wohnungen in Innsbruck sind durch Straßenverkehr stark belastet, vergleichsweise sind hier Flug mit 7%, Schiene mit 11% Anteil der stark belasteten Gebäude und Wohnungen nur im wesentlich untergeordneten Ausmaß beteiligt. Dies ist auch aus folgender Tabelle ersichtlich.

**Tabelle 5: Anteile der belasteten Gebäude, Einwohnerinnen und Einwohner und Wohnungen bezogen auf ganz Innsbruck nach Quelle in Prozent**

|                 |           | Gering | Mittel | Stark |
|-----------------|-----------|--------|--------|-------|
| <b>Flug</b>     | Gebäude   | 52%    | 41%    | 7%    |
|                 | Wohnungen | 47%    | 48%    | 6%    |
| <b>Schiene</b>  | Gebäude   | 58%    | 31%    | 11%   |
|                 | Wohnungen | 53%    | 35%    | 11%   |
| <b>Straße</b>   | Gebäude   | 8%     | 40%    | 52%   |
|                 | Wohnungen | 3%     | 34%    | 63%   |
| <b>Autobahn</b> | Gebäude   | 53%    | 41%    | 6%    |
|                 | Wohnungen | 50%    | 45%    | 5%    |

Nachstehende Abbildung zeigt die prozentuelle Verteilung der Belastung auf die Gebäude in Innsbruck nach Quellen:

**Abbildung 7: Prozentuelle Verteilung der Belastung der Gebäude und Wohnungen in Innsbruck nach Quelle**

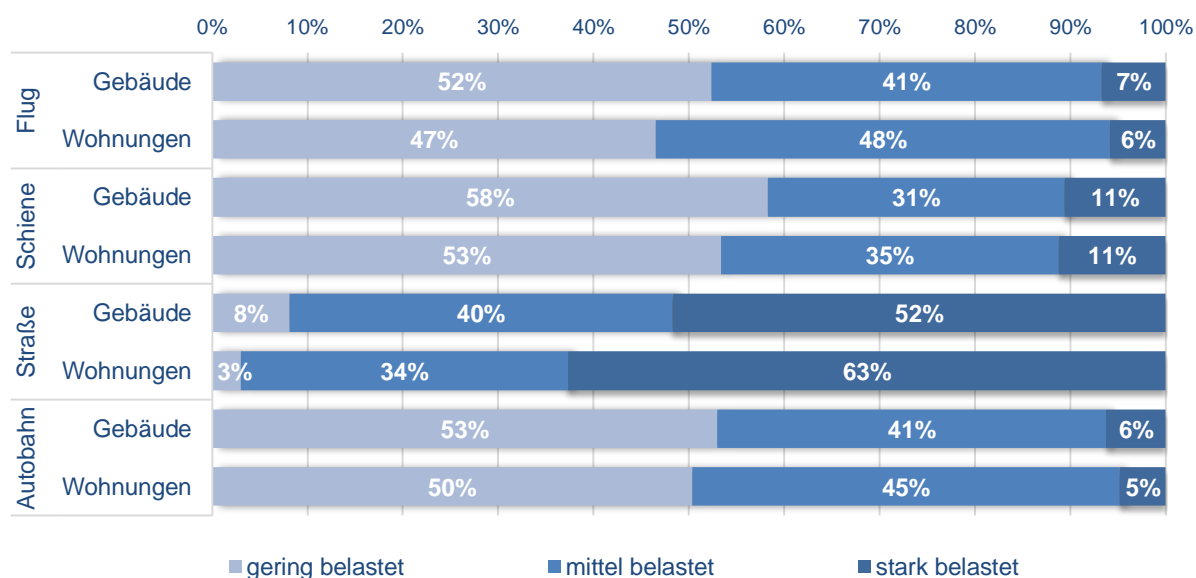

Im Überblick zeigt sich, dass hinsichtlich der Schallbelastung ausgedrückt als  $L_{den}$  der Straßenverkehr insgesamt mit 62% den mit großem Abstand bedeutsamsten Teil ausmacht. Autobahn und Flug zeigen ein sehr ähnliches Bild was die Belastung betrifft. Diesbezüglich weicht auch die Schiene nur unerheblich ab.

Die folgenden Abbildungen zeigen die Rasterlärmkarten für den  $L_{den}$  getrennt nach Quellen unter Berücksichtigung der drei Kategorien für die Belastung „gering“, „mittel“ und „stark“:



Abbildung 8: Rasterlärmkarte 24h-Fluglärm  $L_{den}$  in Innsbruck gruppiert nach Belastungskategorien

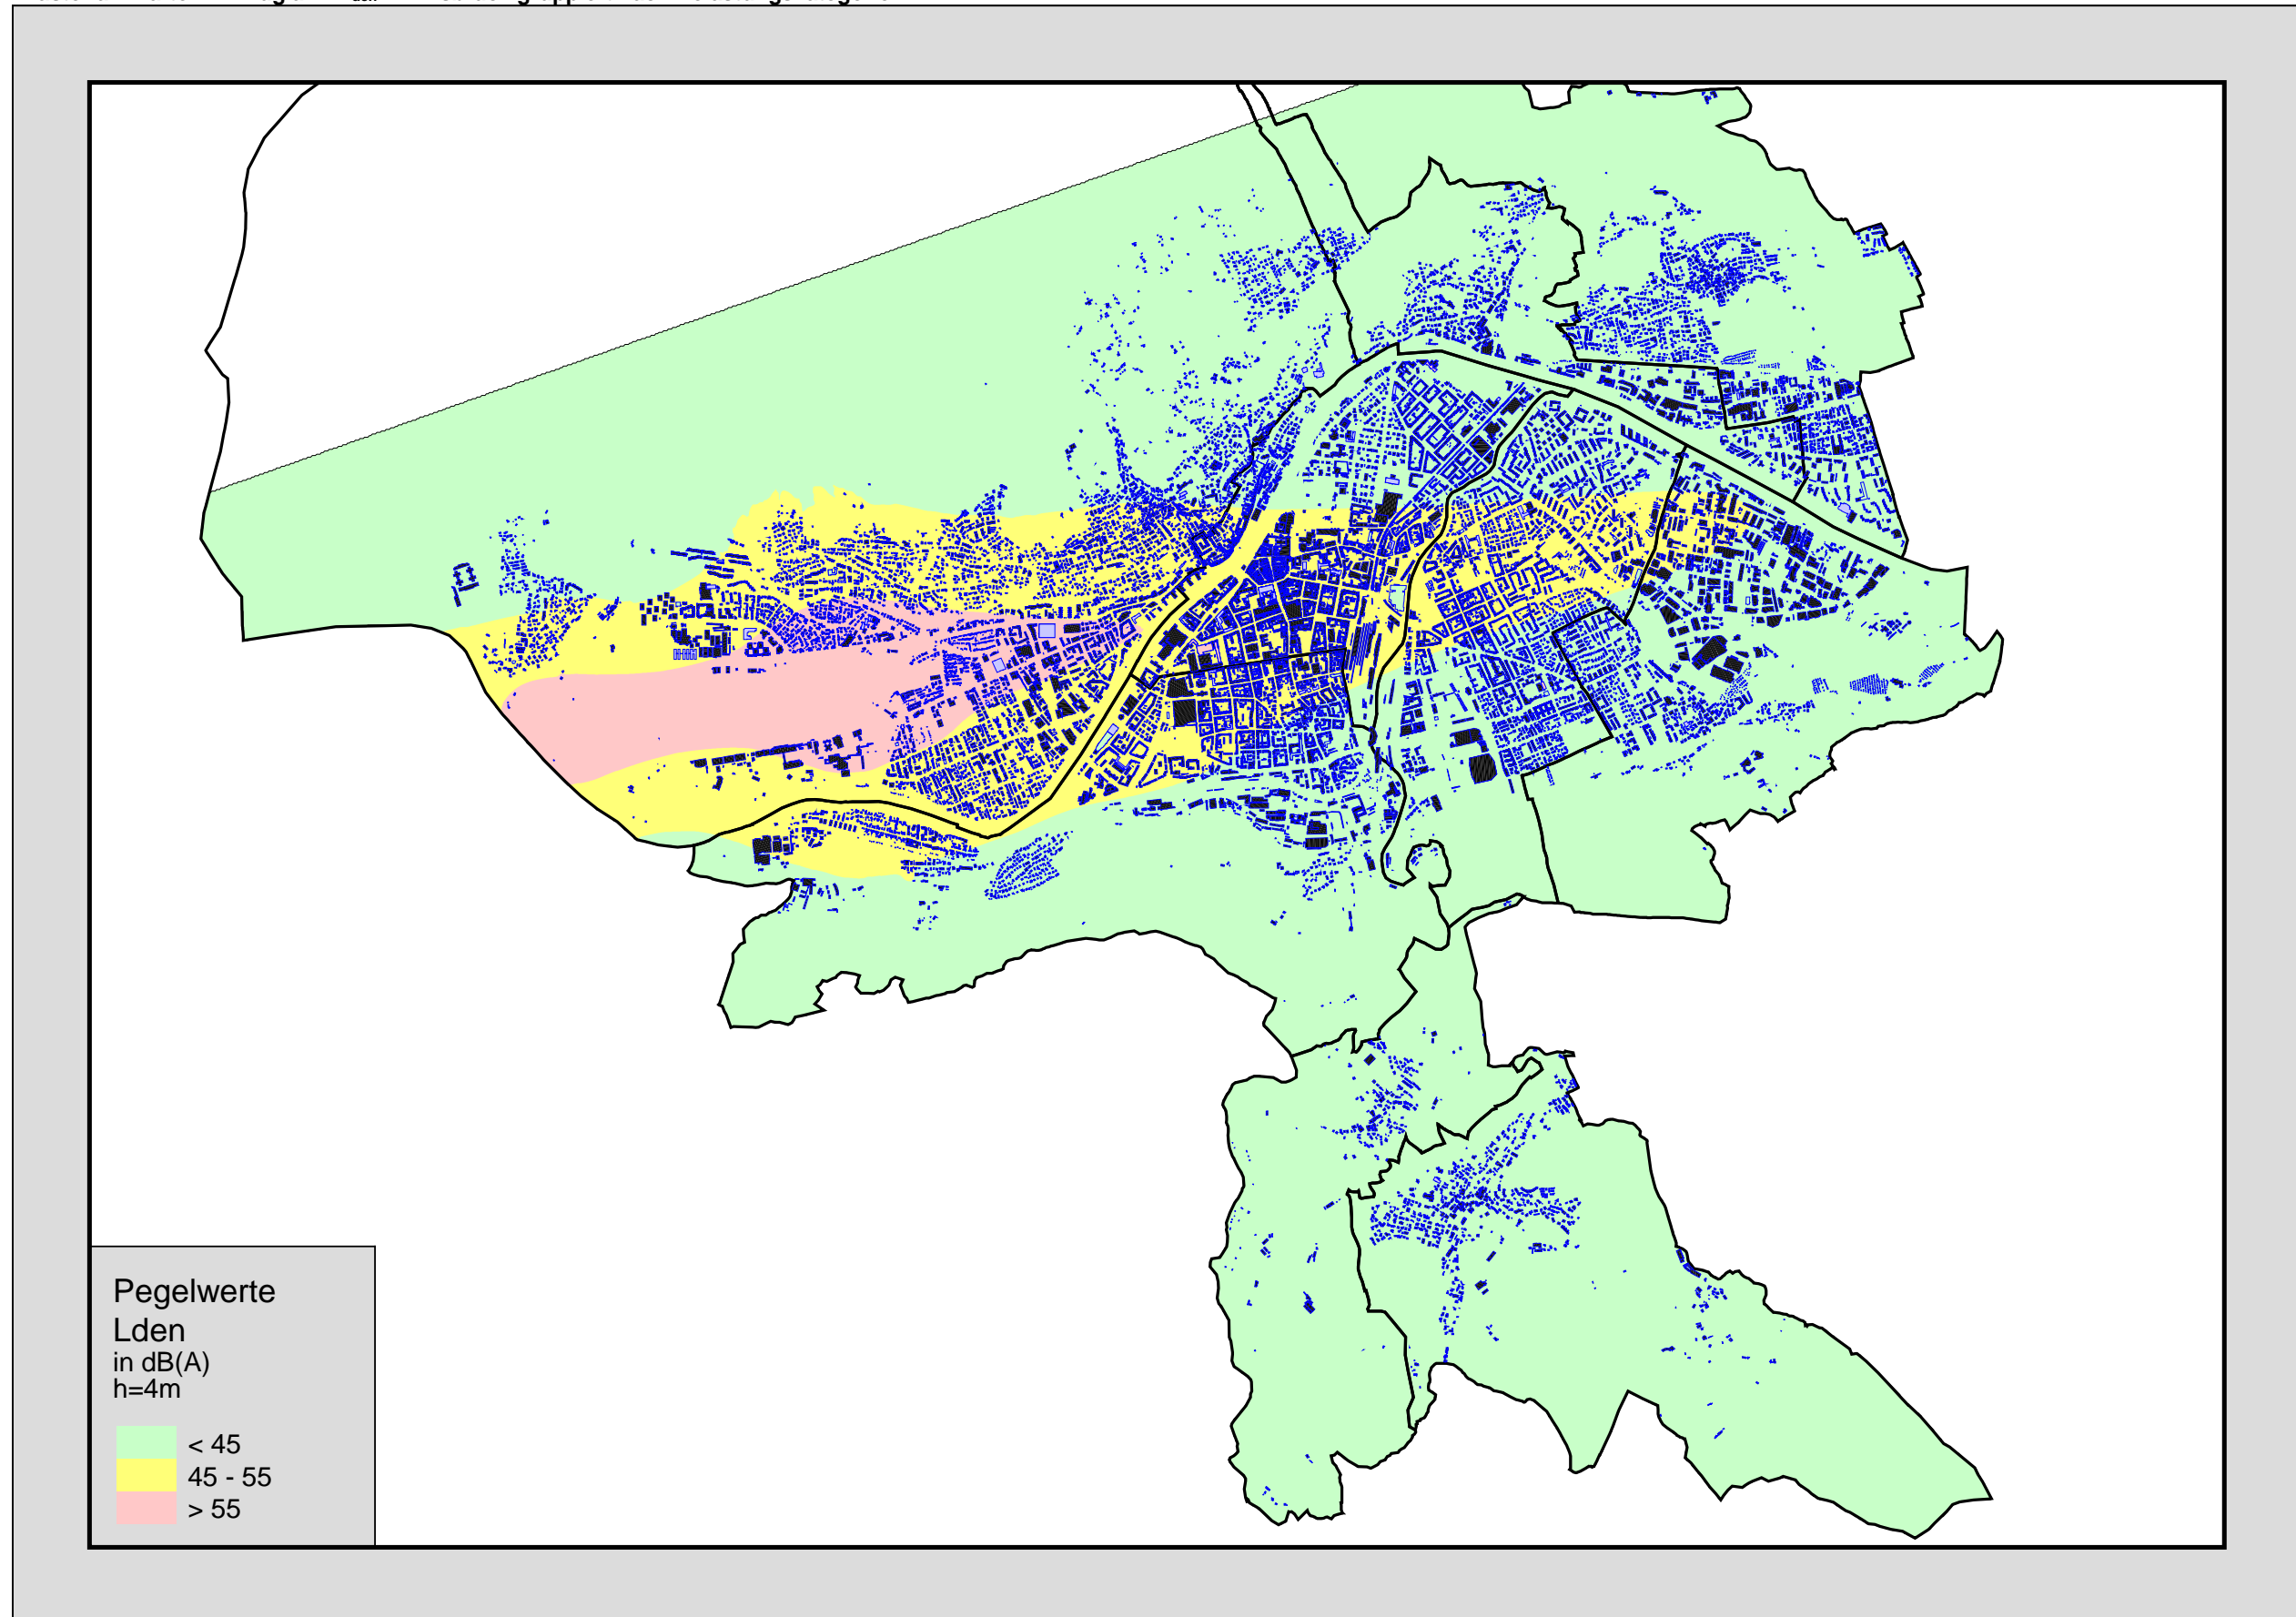

Diese Abbildung zeigt die unterschiedlichen Belastungssituationen durch den Flugbetrieb am Innsbrucker Flughafen. Während sich der Bereich der starken Belastung auf das unmittelbare Flughafenumfeld beschränkt, erstreckt sich das Gebiet der mittleren Belastung in West-Ostrichtung noch über einen weiten Bereich des Stadtgebietes.

Abbildung 9: Rasterlärmkarte 24h-Schienenverkehrslärm  $L_{den}$  in Innsbruck gruppiert nach Belastungskategorien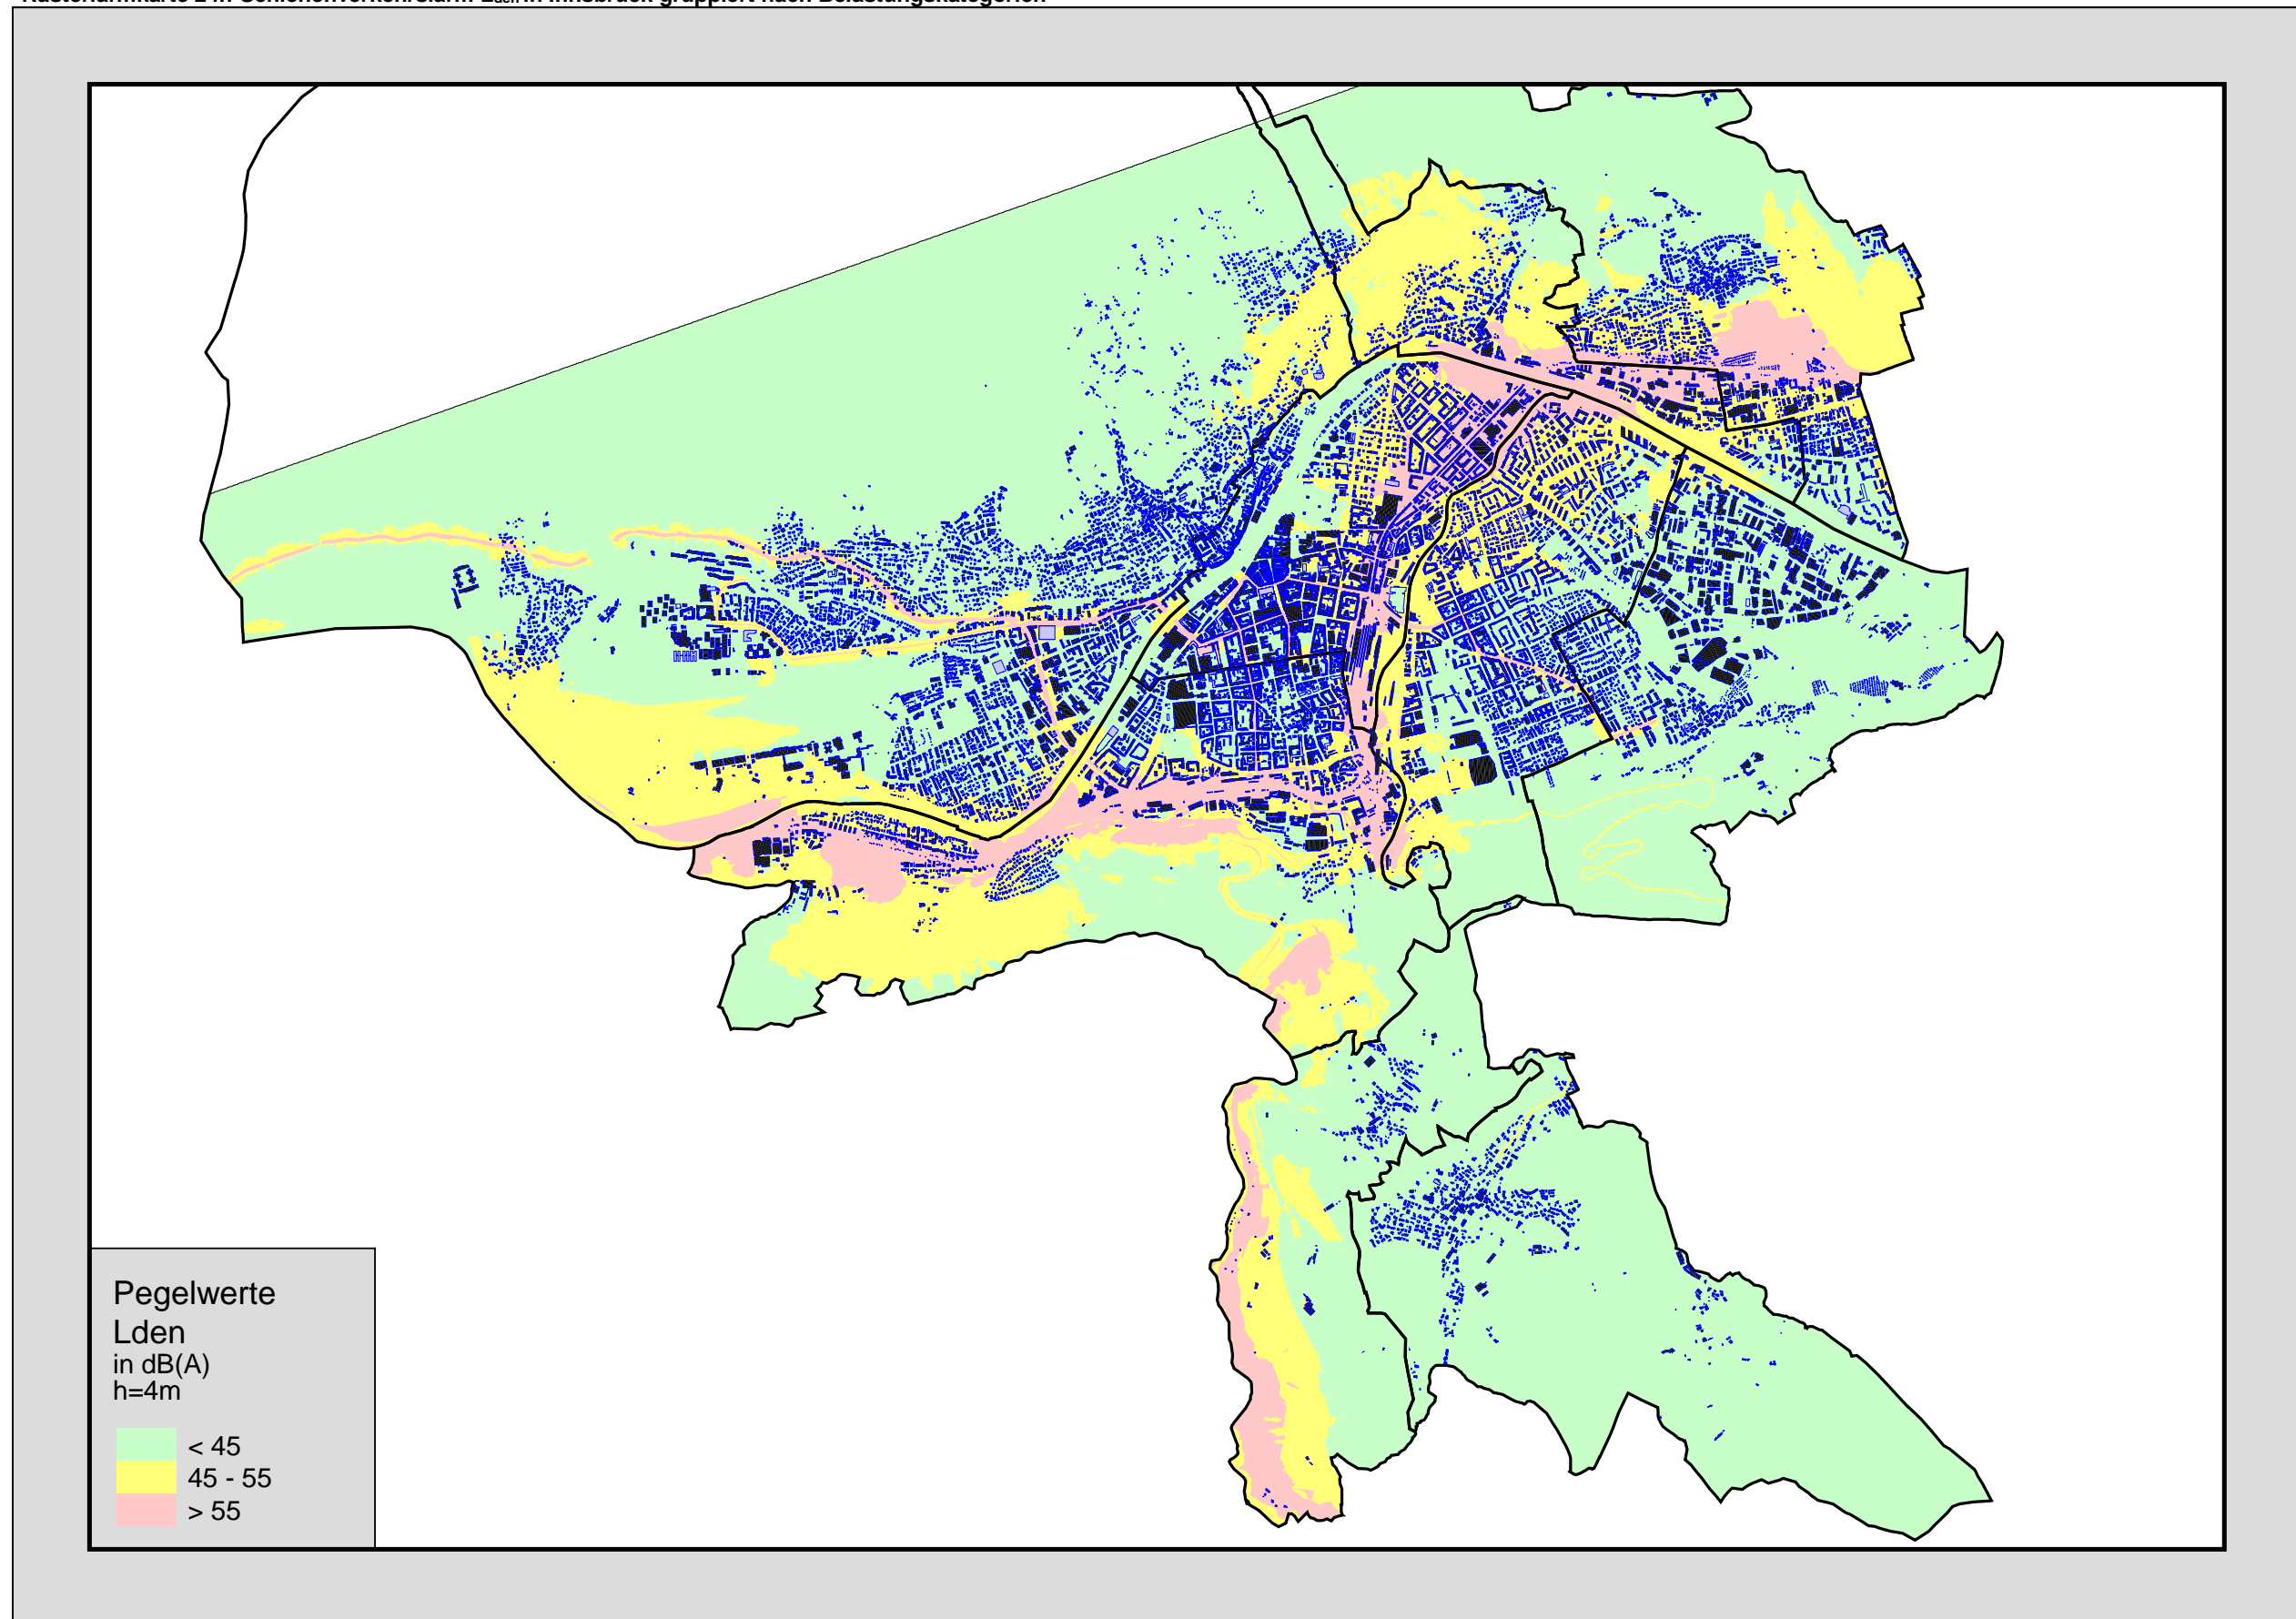

Deutlich erkennbar ist der Schienenkorridor von Ost nach West im Inntal mit der Abzweigung der Brennerbahn in Richtung Süden. Entlang dieses Korridors ergibt sich eine starke Belastung, der Abzweig der Karwendelbahn in Richtung Nord-west ist noch erkennbar, die Straßenbahn tritt optisch kaum in Erscheinung.



Abbildung 10: Rasterlärmkarte 24h-Straßenverkehrslärm  $L_{den}$  in Innsbruck gruppiert nach Belastungskategorien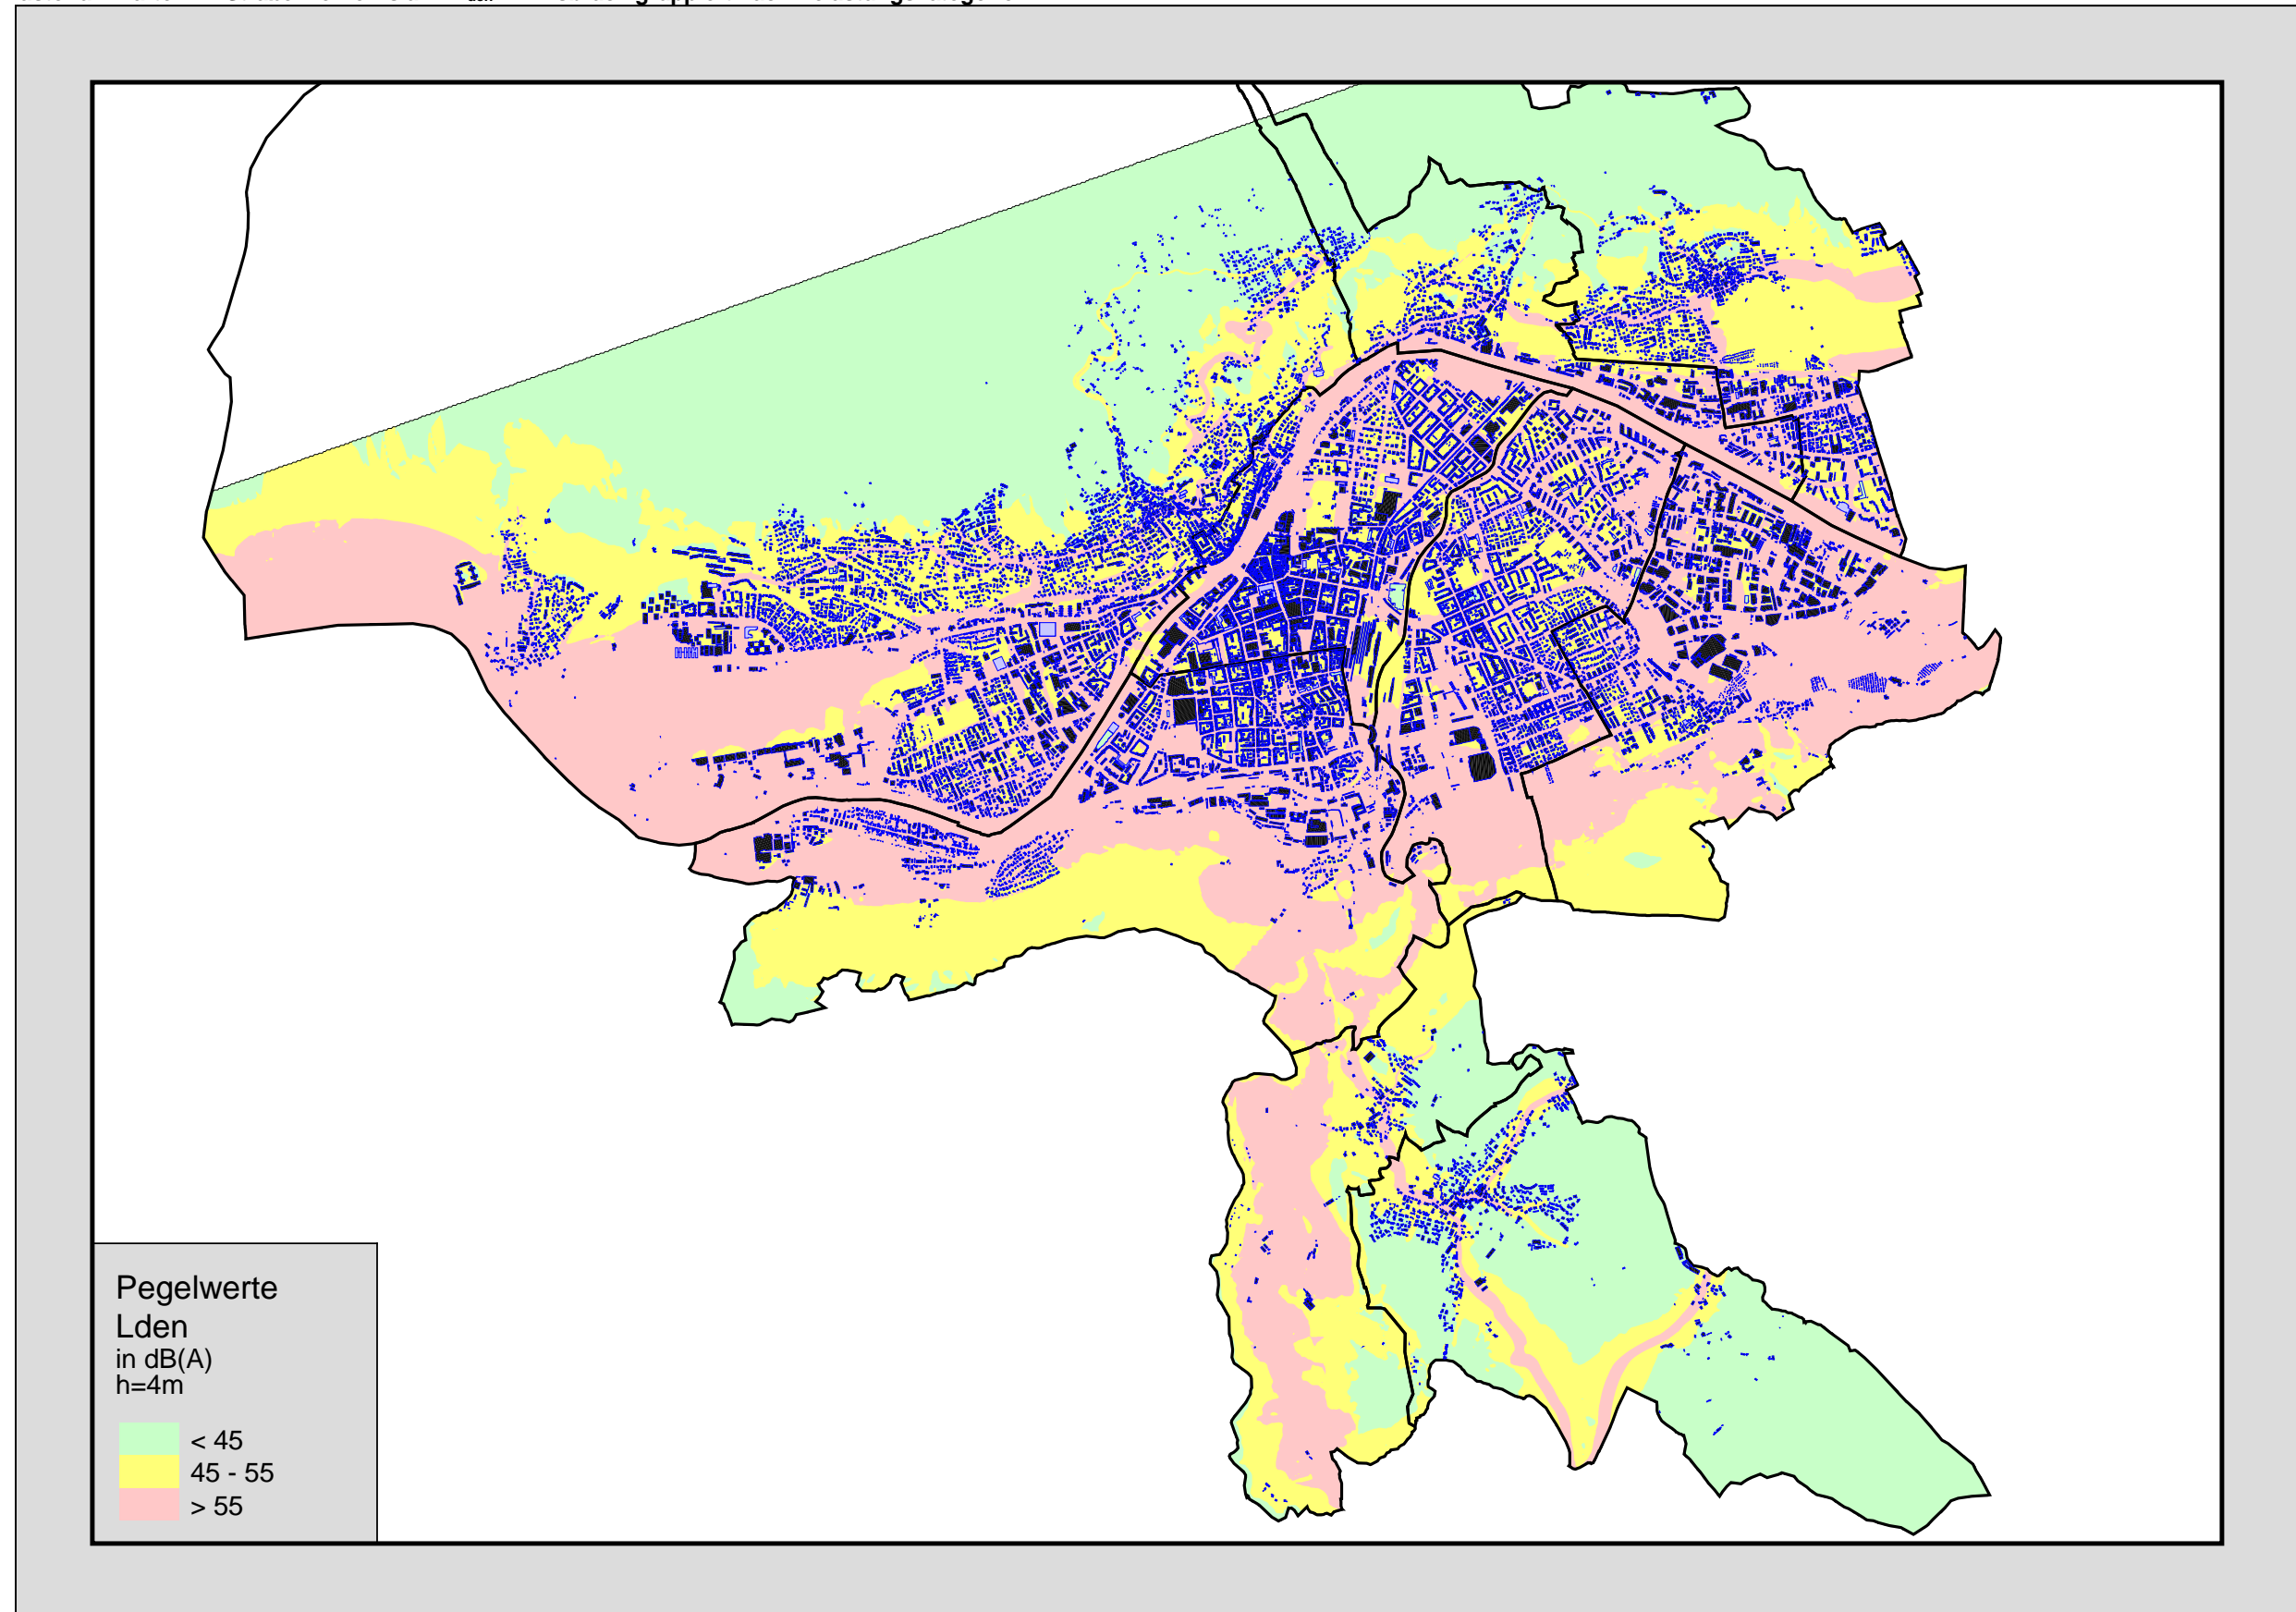

Auf dieser Überblickskarte erscheint der Straßenlärm als die dominierende Schallquelle in Innsbruck. Ausgenommen sind lediglich die südlichen Randgemeinden Igls und Vill, wie auch Teile von Mühlau und Arzl. Die Katastralgemeinden im Stadtkern weisen ein durchgehend hohes Belastungsbild auf. Die im Süden Innsbrucks vorbeiführende Autobahn A12, sowie auch der Abzweig der Brennerautobahn A13 belasten vor allem die Stadtteile Amras, Pradl und Wilten, ebenso wie einen Teil von Hötting. Lärm von der Brennerautobahn wirkt sich vor allem auf unbesiedeltes Gebiet in der Katastralgemeinde Vill aus.

# Verkehrslärmbelastung

Die Unterteilung und Auswertung erfolgte geographisch nach den Katastralgemeinden Innsbrucks:

**Abbildung 11: Übersicht der ausgewerteten Katastralgemeinden in Innsbruck**

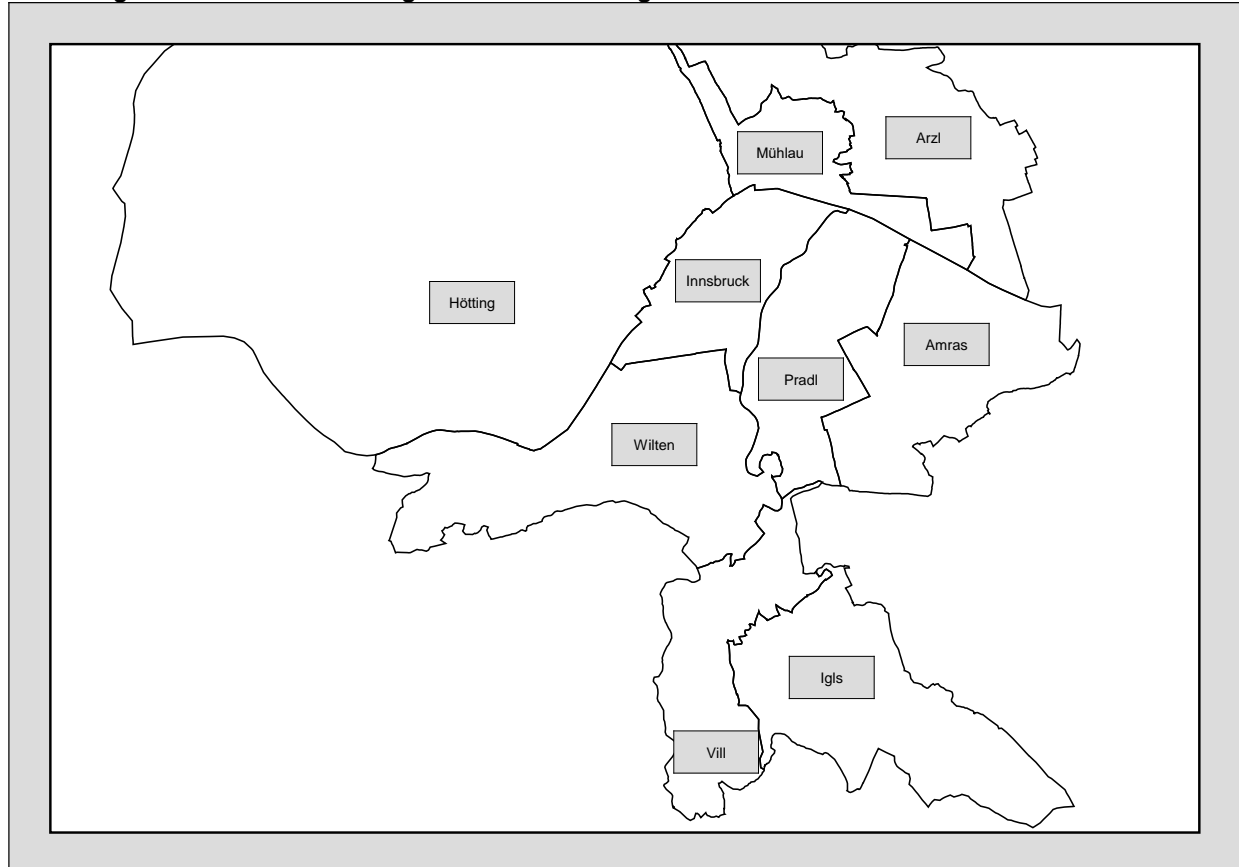

## 1. 24h-Verkehrslärmbelastung

### 1.1. Vergleich Innsbruck gesamt – befragtes Kollektiv

Im Mittelwertvergleich der Lärmbelastung nach Quelle zeigt sich eine Dominanz der Straßenverkehrslärmbelastung, welche im Mittel mit rund 55dB Dauerschallbelastung ( $L_{den}$ ) auf die Gesamtinnsbrucker Wohngebiete einwirkt.

Mit deutlichem Abstand (mehr als 10dB und damit in ihrer Lautheit rund halb so laut<sup>2</sup>) folgen die weiteren Verkehrslärmquellen Fluglärm, Schienenverkehrslärm und Autobahnlärm, die in ihrem mittleren Immissionsdauerschallpegeln fast gleichauf liegen:

<sup>2</sup> Anm.: Die Wahrnehmung der Lautheit einer Schallquelle halbiert und verdoppelt sich in 10dB-Schritten.

**Abbildung 12: Mittelwertvergleich der 24h-Lärmbelastung  $L_{den}$  nach Quelle in dB**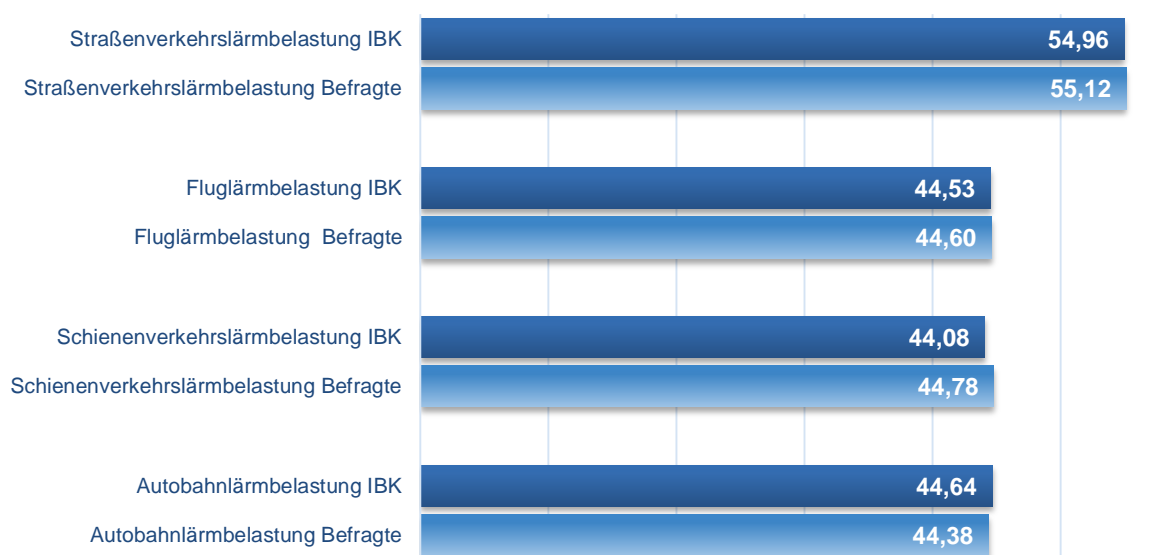

Weiters weist der Mittelwertvergleich auf, dass die Befragungen ein sehr exaktes Abbild der Gesamtlärmbelastungen Innsbrucks bezogen auf Verkehrslärmquellen widerspiegeln:

**Tabelle 6: Mittelwerte der 24h-Lärmbelastung  $L_{den}$  nach Quelle in dB**

|           | Straßen-<br>lärmbe-<br>lastung<br>IBK | Straßenlärm-<br>belastung<br>Befragte | Fluglärm-<br>belastung<br>IBK | Fluglärm-<br>belastung<br>Befragte | Schienen-<br>lärmbe-<br>lastung<br>IBK | Schienen-<br>lärmbe-<br>lastung<br>Befragte | Autobahn-<br>lärmbe-<br>lastung<br>IBK | Autobahn-<br>lärmbelastung<br>Befragte |
|-----------|---------------------------------------|---------------------------------------|-------------------------------|------------------------------------|----------------------------------------|---------------------------------------------|----------------------------------------|----------------------------------------|
| <b>MW</b> | <b>54,9620</b>                        | <b>55,1247</b>                        | <b>44,5260</b>                | <b>44,6020</b>                     | <b>44,0790</b>                         | <b>44,7757</b>                              | <b>44,6420</b>                         | <b>44,3756</b>                         |
| N         | 9711                                  | 1031                                  | 9711                          | 1031                               | 9711                                   | 1031                                        | 9711                                   | 1031                                   |
| Median    | 54,8000                               | 55,1000                               | 44,6000                       | 44,3000                            | 43,1000                                | 43,5000                                     | 44,4000                                | 44,2000                                |
| SA        | 7,32110                               | 7,44587                               | 6,70670                       | 6,97139                            | 7,82080                                | 7,62842                                     | 6,15680                                | 6,00688                                |
| Min.      | 24,90                                 | 24,90                                 | 27,30                         | 30,50                              | 0,00                                   | 20,70                                       | 17,80                                  | 30,30                                  |
| Max.      | 74,30                                 | 72,00                                 | 67,20                         | 66,40                              | 77,90                                  | 69,00                                       | 71,40                                  | 65,70                                  |

\* Bezug Innsbruck (IBK): 9711 gültige Adresspunkte mit im ZMR ausgewiesenen Wohneinheiten – Bezug Befragte: 1031 vollständig geführte Interviews

Auch im absoluten Vergleich des Ausmaßes der Verkehrslärmbelastungen nach Quelle bleibt der Straßenverkehrslärm die dominante Lärmquelle. Während über die Hälfte der Innsbruckerinnen und Innsbrucker vom Flug-, Schienen- und Autobahnärm nur gering (<45dB) belastet sind, fallen über 90% der Einwohnerinnen und Einwohner Innsbrucks beim Straßenverkehrslärm in die Kategorien der mittelgradig bzw. stark Belasteten.

Gruppiert in die drei Belastungskategorien:

- Gering belastet: unter 45dB
- Mittelgradig belastet: 45-55dB
- Stark belastet: über 55dB

stellt sich das Ausmaß der Dauerlärmbelastung wie folgt dar:

**Abbildung 13: Vergleich gruppierte Häufigkeit der 24h-Lärmbelastung  $L_{den}$  nach Quelle in Prozent**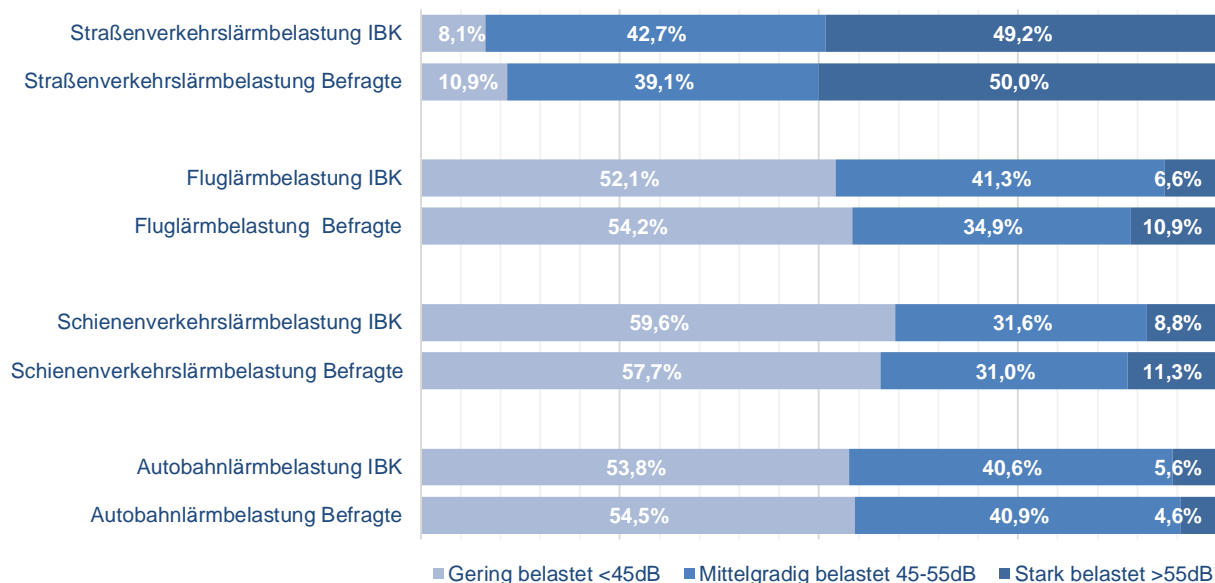

\* Bezug Innsbruck (IBK): 9711 gültige Adresspunkte mit im ZMR ausgewiesenen Wohneinheiten – Bezug Befragte: 1031 vollständig geführte Interviews

Wiederum zeigt sich die hohe Repräsentativität der Befragungen in Bezug zur Grundgesamtheit der zu Wohnzwecken benutzten Innsbrucker Gebäude.

## 1.2. 24h-Verkehrslärmbelastung nach Katastralgemeinden

Der Straßenverkehrslärm ist besonders in den Katastralgemeinden Wilten, Innsbruck, Pradl und Amras sehr ausgeprägt und liegt in diesen Stadtteilen über dem Schwellenwert von 55dB Dauerschallbelastung. Der Fluglärm belastet besonders Hötting und reicht dort im Mittel knapp an die 50dB-Schwelle:

**Abbildung 14: Mittelwertvergleich der 24h-Lärmbelastung  $L_{den}$  bewohnter Gebäude der Innsbrucker Katastralgemeinden nach Quelle in dB**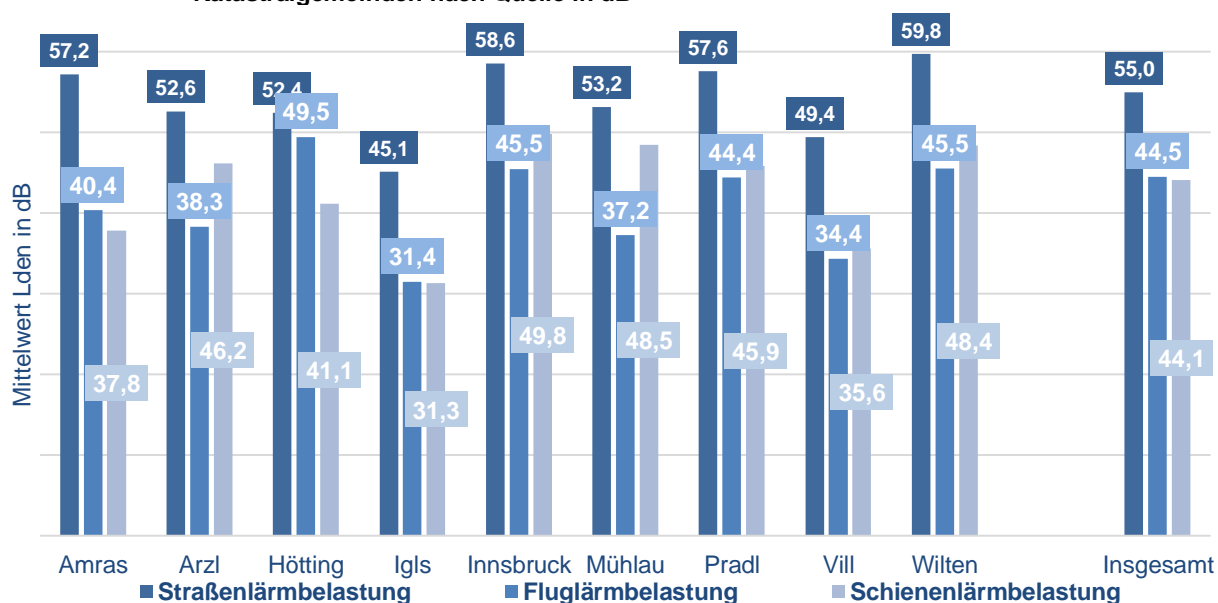



Der Schienenverkehrslärm sticht in den Katastralgemeinden Innsbruck, Mühlau und Wilten hervor, wo ebenfalls knapp eine 50dB-Dauerbelastung der Wohngebäude erreicht wird. Igls und Vill sind die ruhigsten Katastralgemeinden der Stadt Innsbruck.

In der Gegenüberstellung aller 9711 bewohnten Adresspunkte mit dem befragten Kollektiv (N=1031) zeigt sich erneut die sehr hohe Repräsentativität der befragten Stichprobe, auch bezogen auf die Lärmbelastung nach Verkehrsquelle der einzelnen Katastralgemeinden von Innsbruck:

**Tabelle 7: Mittelwerte der 24h-Lärmbelastung  $L_{den}$  der Innsbrucker Katastralgemeinden nach Quelle in dB (Innsbruck gesamt und Befragte gegenübergestellt)**

| Katastralgemeinde |                        | Straßenlärmbelastung IBK | Straßenlärmbelastung Befragte | Fluglärmbelastung IBK | Fluglärmbelastung Befragte | Schienenlärmbelastung IBK | Schienenlärmbelastung Befragte |
|-------------------|------------------------|--------------------------|-------------------------------|-----------------------|----------------------------|---------------------------|--------------------------------|
| Amras             | N                      | 496                      | 60                            | 496                   | 60                         | 496                       | 60                             |
|                   | <b>Mittelwert (dB)</b> | <b>57,186</b>            | <b>56,1133</b>                | <b>40,350</b>         | <b>40,8617</b>             | <b>37,839</b>             | <b>41,1600</b>                 |
|                   | Median                 | 56,500                   | 56,2000                       | 39,900                | 40,2500                    | 38,900                    | 40,5000                        |
|                   | Standardabweichung     | 5,0737                   | 4,30236                       | 2,1609                | 2,21789                    | 6,9256                    | 5,56820                        |
|                   | Minimum                | 48,5                     | 50,10                         | 36,2                  | 37,60                      | 14,3                      | 24,40                          |
|                   | Maximum                | 74,3                     | 65,80                         | 45,8                  | 44,00                      | 54,0                      | 53,80                          |
| Arzl              | N                      | 890                      | 102                           | 890                   | 102                        | 890                       | 102                            |
|                   | <b>Mittelwert</b>      | <b>52,624</b>            | <b>51,3667</b>                | <b>38,315</b>         | <b>38,6657</b>             | <b>46,153</b>             | <b>44,9137</b>                 |
|                   | Median                 | 51,800                   | 51,9000                       | 37,500                | 37,4000                    | 45,200                    | 44,2000                        |
|                   | Standardabweichung     | 6,3688                   | 6,11990                       | 2,8300                | 3,48691                    | 5,5886                    | 5,58685                        |
|                   | Minimum                | 24,9                     | 24,90                         | 31,5                  | 31,60                      | 32,5                      | 32,50                          |
|                   | Maximum                | 71,8                     | 63,70                         | 44,3                  | 44,20                      | 72,8                      | 61,10                          |
| Hötting           | N                      | 3178                     | 243                           | 3178                  | 243                        | 3178                      | 243                            |
|                   | <b>Mittelwert</b>      | <b>52,441</b>            | <b>52,2103</b>                | <b>49,454</b>         | <b>51,5391</b>             | <b>41,134</b>             | <b>40,4959</b>                 |
|                   | Median                 | 52,100                   | 52,7000                       | 49,200                | 52,7000                    | 40,200                    | 39,7000                        |
|                   | Standardabweichung     | 6,6220                   | 7,66306                       | 6,8507                | 8,01928                    | 5,4833                    | 5,23246                        |
|                   | Minimum                | 31,8                     | 32,00                         | 32,2                  | 33,30                      | 11,2                      | 27,00                          |
|                   | Maximum                | 69,9                     | 67,50                         | 67,2                  | 66,40                      | 59,9                      | 58,30                          |
| Igls              | N                      | 435                      | 35                            | 435                   | 35                         | 435                       | 35                             |
|                   | <b>Mittelwert</b>      | <b>45,142</b>            | <b>42,1229</b>                | <b>31,448</b>         | <b>31,6971</b>             | <b>31,329</b>             | <b>31,9771</b>                 |
|                   | Median                 | 43,600                   | 41,3000                       | 31,400                | 31,8000                    | 33,300                    | 32,4000                        |
|                   | Standardabweichung     | 7,4565                   | 4,85575                       | 1,1296                | ,64784                     | 7,7740                    | 5,48249                        |
|                   | Minimum                | 30,9                     | 33,80                         | 27,3                  | 30,50                      | 0,0                       | 20,70                          |
|                   | Maximum                | 64,5                     | 57,50                         | 35,1                  | 33,20                      | 42,6                      | 39,30                          |
| Innsbruck         | N                      | 1240                     | 176                           | 1240                  | 176                        | 1240                      | 176                            |
|                   | <b>Mittelwert</b>      | <b>58,567</b>            | <b>58,4915</b>                | <b>45,481</b>         | <b>45,1858</b>             | <b>49,818</b>             | <b>50,2267</b>                 |
|                   | Median                 | 59,200                   | 57,4000                       | 45,700                | 44,9000                    | 50,500                    | 51,8000                        |
|                   | Standardabweichung     | 6,5932                   | 6,49518                       | 4,1193                | 3,87952                    | 7,9702                    | 8,12525                        |
|                   | Minimum                | 44,9                     | 45,40                         | 38,5                  | 39,10                      | 36,2                      | 36,50                          |
|                   | Maximum                | 70,9                     | 70,80                         | 54,0                  | 53,50                      | 73,3                      | 64,80                          |
| Mühlau            | N                      | 429                      | 50                            | 429                   | 50                         | 429                       | 50                             |
|                   | <b>Mittelwert</b>      | <b>53,191</b>            | <b>49,6020</b>                | <b>37,243</b>         | <b>35,6180</b>             | <b>48,483</b>             | <b>48,5660</b>                 |
|                   | Median                 | 53,200                   | 47,9500                       | 36,500                | 35,6000                    | 48,400                    | 49,3500                        |
|                   | Standardabweichung     | 9,1892                   | 6,56448                       | 3,1156                | ,75015                     | 4,8228                    | 2,27045                        |
|                   | Minimum                | 33,9                     | 39,40                         | 32,0                  | 34,30                      | 33,1                      | 41,60                          |
|                   | Maximum                | 72,9                     | 68,80                         | 44,3                  | 37,70                      | 68,2                      | 51,90                          |
| Pradl             | N                      | 1649                     | 188                           | 1649                  | 188                        | 1649                      | 188                            |
|                   | <b>Mittelwert</b>      | <b>57,594</b>            | <b>58,1899</b>                | <b>44,390</b>         | <b>44,3064</b>             | <b>45,889</b>             | <b>46,2085</b>                 |
|                   | Median                 | 56,800                   | 56,8000                       | 44,800                | 44,6000                    | 45,500                    | 45,3500                        |
|                   | Standardabweichung     | 5,4493                   | 5,54823                       | 2,5472                | 2,37319                    | 5,0690                    | 5,38786                        |
|                   | Minimum                | 44,2                     | 46,40                         | 38,6                  | 39,10                      | 34,8                      | 36,10                          |
|                   | Maximum                | 73,6                     | 72,00                         | 49,0                  | 48,80                      | 64,2                      | 64,20                          |

|                        |                    |               |                |               |                |               |                |
|------------------------|--------------------|---------------|----------------|---------------|----------------|---------------|----------------|
|                        | N                  | 143           | 21             | 143           | 21             | 143           | 21             |
|                        | <b>Mittelwert</b>  | <b>49,402</b> | <b>48,9143</b> | <b>34,373</b> | <b>34,5000</b> | <b>35,626</b> | <b>34,9762</b> |
| <b>Vill</b>            | Median             | 48,900        | 47,6000        | 34,200        | 34,4000        | 34,000        | 34,1000        |
|                        | Standardabweichung | 5,7367        | 3,76076        | 1,0497        | ,51088         | 6,9741        | 2,30280        |
|                        | Minimum            | 37,9          | 44,00          | 30,3          | 34,10          | 26,6          | 32,80          |
|                        | Maximum            | 69,1          | 56,50          | 36,9          | 36,10          | 77,9          | 41,20          |
|                        | N                  | 1251          | 156            | 1251          | 156            | 1251          | 156            |
|                        | <b>Mittelwert</b>  | <b>59,766</b> | <b>59,7724</b> | <b>45,523</b> | <b>45,9487</b> | <b>48,377</b> | <b>47,8417</b> |
| <b>Wilten</b>          | Median             | 59,100        | 59,0500        | 45,500        | 46,3000        | 47,600        | 45,1000        |
|                        | Standardabweichung | 5,1347        | 4,20240        | 2,3930        | 2,19770        | 7,6643        | 7,69641        |
|                        | Minimum            | 46,8          | 50,90          | 36,6          | 40,70          | 36,5          | 37,80          |
|                        | Maximum            | 73,5          | 68,50          | 50,7          | 50,30          | 75,2          | 69,00          |
|                        | N                  | 9711          | 1031           | 9711          | 1031           | 9711          | 1031           |
|                        | <b>Mittelwert</b>  | <b>54,962</b> | <b>55,1247</b> | <b>44,526</b> | <b>44,6020</b> | <b>44,079</b> | <b>44,7757</b> |
| <b>Insge-<br/>samt</b> | Median             | 54,800        | 55,1000        | 44,600        | 44,3000        | 43,100        | 43,5000        |
|                        | Standardabweichung | 7,3211        | 7,44587        | 6,7067        | 6,97139        | 7,8208        | 7,62842        |
|                        | Minimum            | 24,9          | 24,90          | 27,3          | 30,50          | 0,0           | 20,70          |
|                        | Maximum            | 74,3          | 72,00          | 67,2          | 66,40          | 77,9          | 69,00          |

Wird die Verkehrslärmbelastung gruppiert in 3 Belastungskategorien und nach Quelle dargestellt, zeigen sich im Extremgruppenvergleich der stark belasteten Adresspunkte (Dauerschallpegel  $L_{den} > 55\text{dB}$ ) noch deutlicher die bereits weiter oben beschriebenen Unterschiede zwischen den einzelnen Katastralgemeinden:

**Abbildung 15: Stark verkehrslärmbelastete Adresspunkte in Innsbruck nach Quelle und Katastralgemeinde in Prozent**

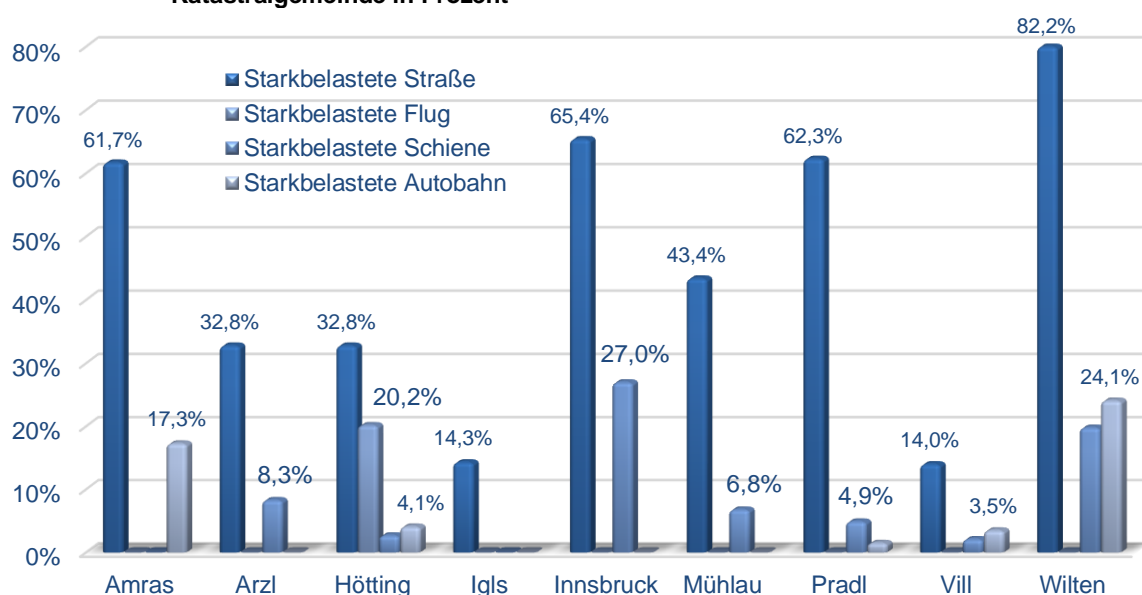

Über 80% aller Adresspunkte in Wilten sind stark vom Straßenverkehrslärm belastet, in den Katastralgemeinden Innsbruck, Pradl und Amras sind es über 60%, in Igls und Vill hingegen nur 14%. Vom Fluglärm starkbelastete Wohngebäude sind ausschließlich in Hötting vorhanden (20,2% aller bewohnten Adresspunkte). Der Schienenverkehrslärm belastet in Innsbruck und Wilten rund ein Viertel aller Gebäude stark. Die Autobahn wirkt sich vor allem in Wilten (24%) und Amras (17,3%) stark lärmbelastend aus:

**Tabelle 8: Straßenverkehrslärmbelastung  $L_{den}$  in 3 Belastungskategorien nach Katastralgemeinde**

|                         |         | Katastralgemeinde |        |         |        |           |        |        |        |        |
|-------------------------|---------|-------------------|--------|---------|--------|-----------|--------|--------|--------|--------|
|                         |         | Amras             | Arzl   | Hötting | Igls   | Innsbruck | Mühlau | Pradl  | Vill   | Wilten |
| Starkbelastete > 55dB   | Anzahl  | 306               | 292    | 1041    | 62     | 811       | 186    | 1027   | 20     | 1028   |
|                         | Prozent | 61,7%             | 32,8%  | 32,8%   | 14,3%  | 65,4%     | 43,4%  | 62,3%  | 14,0%  | 82,2%  |
| Mittelbelastete 45-55dB | Anzahl  | 190               | 530    | 1798    | 116    | 428       | 152    | 620    | 91     | 223    |
|                         | Prozent | 38,3%             | 59,6%  | 56,6%   | 26,7%  | 34,5%     | 35,4%  | 37,6%  | 63,6%  | 17,8%  |
| Geringbelastete < 45db  | Anzahl  | 0                 | 68     | 339     | 257    | 1         | 91     | 2      | 32     | 0      |
|                         | Prozent | 0,0%              | 7,6%   | 10,7%   | 59,1%  | 0,1%      | 21,2%  | 0,1%   | 22,4%  | 0,0%   |
| Gesamt                  | Anzahl  | 496               | 890    | 3178    | 435    | 1240      | 429    | 1649   | 143    | 1251   |
|                         | Prozent | 100,0%            | 100,0% | 100,0%  | 100,0% | 100,0%    | 100,0% | 100,0% | 100,0% | 100,0% |

**Tabelle 9: Fluglärmbelastung  $L_{den}$  in 3 Belastungskategorien nach Katastralgemeinde**

|                         |         | Katastralgemeinde |        |         |        |           |        |        |        |        |
|-------------------------|---------|-------------------|--------|---------|--------|-----------|--------|--------|--------|--------|
|                         |         | Amras             | Arzl   | Hötting | Igls   | Innsbruck | Mühlau | Pradl  | Vill   | Wilten |
| Starkbelastete > 55dB   | Anzahl  | 0                 | 0      | 643     | 0      | 0         | 0      | 0      | 0      | 0      |
|                         | Prozent | 0,0%              | 0,0%   | 20,2%   | 0,0%   | 0,0%      | 0,0%   | 0,0%   | 0,0%   | 0,0%   |
| Mittelbelastete 45-55dB | Anzahl  | 12                | 0      | 1841    | 0      | 637       | 0      | 774    | 0      | 748    |
|                         | Prozent | 2,4%              | 0,0%   | 57,9%   | 0,0%   | 51,4%     | 0,0%   | 46,9%  | 0,0%   | 59,8%  |
| Geringbelastete < 45db  | Anzahl  | 484               | 890    | 694     | 435    | 603       | 429    | 875    | 143    | 503    |
|                         | Prozent | 97,6%             | 100,0% | 21,8%   | 100,0% | 48,6%     | 100,0% | 53,1%  | 100,0% | 40,2%  |
| Gesamt                  | Anzahl  | 496               | 890    | 3178    | 435    | 1240      | 429    | 1649   | 143    | 1251   |
|                         | Prozent | 100,0%            | 100,0% | 100,0%  | 100,0% | 100,0%    | 100,0% | 100,0% | 100,0% | 100,0% |

**Tabelle 10: Schienenverkehrslärmbelastung  $L_{den}$  in 3 Belastungskategorien nach Katastralgemeinde**

|                         |         | Katastralgemeinde |        |         |        |           |        |        |        |        |
|-------------------------|---------|-------------------|--------|---------|--------|-----------|--------|--------|--------|--------|
|                         |         | Amras             | Arzl   | Hötting | Igls   | Innsbruck | Mühlau | Pradl  | Vill   | Wilten |
| Starkbelastete > 55dB   | Anzahl  | 0                 | 74     | 87      | 0      | 335       | 29     | 80     | 3      | 248    |
|                         | Prozent | 0,0%              | 8,3%   | 2,7%    | 0,0%   | 27,0%     | 6,8%   | 4,9%   | 2,1%   | 19,8%  |
| Mittelbelastete 45-55dB | Anzahl  | 43                | 398    | 552     | 0      | 487       | 300    | 805    | 3      | 484    |
|                         | Prozent | 8,7%              | 44,7%  | 17,4%   | 0,0%   | 39,3%     | 69,9%  | 48,8%  | 2,1%   | 38,7%  |
| Geringbelastete < 45db  | Anzahl  | 453               | 418    | 2539    | 435    | 418       | 100    | 764    | 137    | 519    |
|                         | Prozent | 91,3%             | 47,0%  | 79,9%   | 100,0% | 33,7%     | 23,3%  | 46,3%  | 95,8%  | 41,5%  |
| Gesamt                  | Anzahl  | 496               | 890    | 3178    | 435    | 1240      | 429    | 1649   | 143    | 1251   |
|                         | Prozent | 100,0%            | 100,0% | 100,0%  | 100,0% | 100,0%    | 100,0% | 100,0% | 100,0% | 100,0% |

**Tabelle 11: Autobahnlärmbelastung  $L_{den}$  in 3 Belastungskategorien nach Katastralgemeinde**

|                         |         | Katastralgemeinde |        |         |        |           |        |        |        |        |
|-------------------------|---------|-------------------|--------|---------|--------|-----------|--------|--------|--------|--------|
|                         |         | Amras             | Arzl   | Hötting | Igls   | Innsbruck | Mühlau | Pradl  | Vill   | Wilten |
| Starkbelastete > 55dB   | Anzahl  | 86                | 0      | 129     | 0      | 0         | 0      | 25     | 5      | 302    |
|                         | Prozent | 17,3%             | 0,0%   | 4,1%    | 0,0%   | 0,0%      | 0,0%   | 1,5%   | 3,5%   | 24,1%  |
| Mittelbelastete 45-55dB | Anzahl  | 399               | 62     | 1801    | 1      | 120       | 28     | 869    | 18     | 645    |
|                         | Prozent | 80,4%             | 7,0%   | 56,7%   | 0,2%   | 9,7%      | 6,5%   | 52,7%  | 12,6%  | 51,6%  |
| Geringbelastete < 45dB  | Anzahl  | 11                | 828    | 1248    | 434    | 1120      | 401    | 755    | 120    | 304    |
|                         | Prozent | 2,2%              | 93,0%  | 39,3%   | 99,8%  | 90,3%     | 93,5%  | 45,8%  | 83,9%  | 24,3%  |
| Gesamt                  | Anzahl  | 496               | 890    | 3178    | 435    | 1240      | 429    | 1649   | 143    | 1251   |
|                         | Prozent | 100,0%            | 100,0% | 100,0%  | 100,0% | 100,0%    | 100,0% | 100,0% | 100,0% | 100,0% |

## 2. Verkehrslärmbelastung in der Nacht

### 2.1. Vergleich Innsbruck gesamt – befragtes Kollektiv

Die Lärmbelastung nach Quelle verändert sich im Nachtzeitraum (22h bis 6h) stark. Der Straßenverkehrslärm bleibt die mit Abstand dominierende Lärmquelle, nimmt aber im Vergleich zu den 24h-Pegeln und damit vor allem gegenüber dem 24h-Zeitraum um rund 10dB ab und ist damit in seiner Lautheit halbiert.<sup>3</sup> Gleiches gilt für den Autobahnlärm.

Der Schienenverkehrslärm verringert sich im Nachtzeitraum ebenso, allerdings weniger deutlich als der Straßen- und Autobahnverkehrslärm. Im Mittelwertvergleich sinkt die Lärmbelastung der Innsbrucker Wohngebiete durch den Schienenverkehrslärm im Nachtzeitraum um rund 7dB:

**Abbildung 16: Mittelwertvergleich der nächtlichen Lärmbelastung  $L_n$  nach Quelle in dB**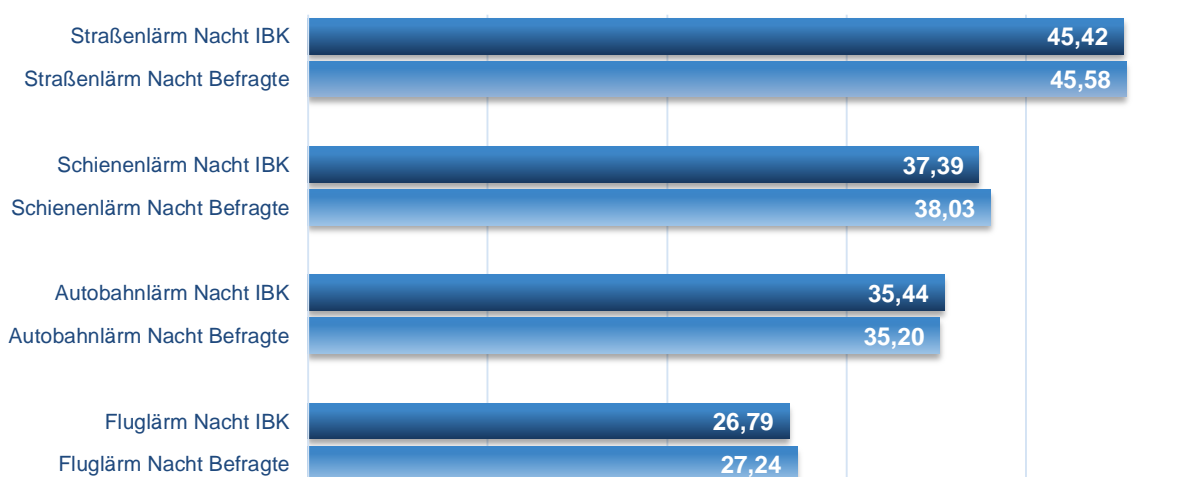

<sup>3</sup> Anm.: Die Wahrnehmung der Lautheit einer Schallquelle halbiert sich in 10dB-Schritten.

Am stärksten nimmt in den Nachtstunden die Lärmbelastung durch den Flugverkehr ab. Diese verringert sich um knapp 18dB gegenüber dem 24h-Pegel und trägt damit im Vergleich der einzelnen Verkehrslärmquellen mit Abstand am wenigsten zur Gesamtlärmbelastung Innsbrucks in der Nacht bei.

Auch der Mittelwertvergleich der Verkehrslärmquellen im Nachtzeitraum zwischen dem Gesamtkollektiv der 9711 bewohnten Adresspunkte in Innsbruck und den 1031 befragten Personen zeigt das sehr genaue Abbild der Grundgesamtheit durch die Stichprobe, das mit den Befragungen erreicht werden konnte:

**Tabelle 12: Mittelwerte der nächtlichen Lärmbelastung  $L_n$  nach Quelle in dB**

|           | Straßenlärm<br>Nacht IBK | Straßenlärm<br>Nacht<br>Befragte | Schienenlärm<br>Nacht IBK | Schienenlärm<br>Nacht Be-<br>fragte | Autobahnlärm<br>Nacht IBK | Autobahnlärm<br>Nacht Befrag-<br>te | Fluglärm<br>Nacht IBK | Fluglärm<br>Nacht<br>Befragte |
|-----------|--------------------------|----------------------------------|---------------------------|-------------------------------------|---------------------------|-------------------------------------|-----------------------|-------------------------------|
| <b>MW</b> | <b>45,4206</b>           | <b>45,5835</b>                   | <b>37,3864</b>            | <b>38,0290</b>                      | <b>35,4407</b>            | <b>35,1979</b>                      | <b>26,7933</b>        | <b>27,2378</b>                |
| N         | 9711                     | 1031                             | 9711                      | 1031                                | 9711                      | 1031                                | 9711                  | 1031                          |
| Median    | 45,4                     | 45,6                             | 36,5                      | 36,9                                | 35,1                      | 35                                  | 27,1                  | 27,6                          |
| SA        | 7,3539                   | 7,4612                           | 7,7932                    | 7,5497                              | 6,1288                    | 5,9720                              | 7,3489                | 7,4643                        |
| Min.      | 15,3                     | 15,3                             | 0                         | 10,6                                | 9,3                       | 21,2                                | 2,9                   | 7,5                           |
| Max.      | 65,5                     | 63,3                             | 71,7                      | 62,7                                | 62,4                      | 56,7                                | 49,5                  | 47,7                          |

\* Bezug Innsbruck (IBK): 9711 gültige Adresspunkte mit im ZMR ausgewiesenen Wohneinheiten – Bezug Befragte: 1031 vollständig geführte Interviews

Aus dem absoluten Vergleich des Ausmaßes der Verkehrslärmbelastungen in der Nacht nach Quelle geht erneut der Straßenverkehrslärm als dominante Lärmquelle hervor.

Über 50% der Innsbruckerinnen und Innsbrucker sind auch in der Nacht mittelgradig bzw. stark vom Straßenverkehrslärm belastet.

Beim Schienenverkehrslärm reduziert sich der Anteil der mittelgradig bzw. stark Belasteten in der Nacht auf unter 14%, bei den Autobahnlärmbelasteten auf unter 8%.

Stark fluglärmbelastete Adresspunkte gibt es im Nachtzeitraum in Innsbruck nicht, deutlich weniger als 1% sind als mittelgradig belastet einzustufen:

Gruppiert in die drei Belastungskategorien:

- Gering belastet: unter 45dB
- Mittelgradig belastet: 45-55dB
- Stark belastet: über 55dB

stellt sich das Ausmaß der Verkehrslärmbelastung in den Nachtstunden wie folgt dar:

**Abbildung 17: Vergleich gruppierte Häufigkeit der nächtlichen Lärmbelastung  $L_n$  nach Quelle in Prozent**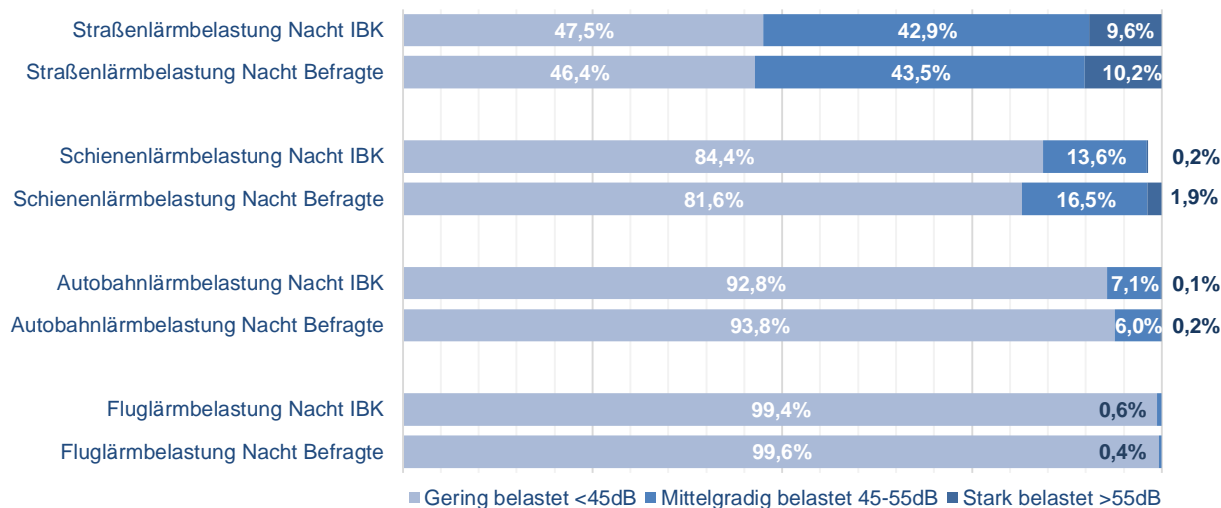

\* Bezug Innsbruck (IBK): 9711 gültige Adresspunkte mit im ZMR ausgewiesenen Wohneinheiten – Bezug Befragte: 1031 vollständig geführte Interviews

Auch im Nachtzeitraum bildet das befragte Kollektiv die Verkehrslärmbelastungssituation nach Lärmquellen in Innsbruck insgesamt sehr gut ab.

## 2.2. Verkehrslärmbelastung in der Nacht nach Katastralgemeinden

Die nächtliche Straßenverkehrslärmbelastung liegt im Mittelwert aller bewohnten Innsbrucker Adresspunkte in Wilten am höchsten und dort auch über dem Schwellenwert von 50dB:

**Abbildung 18: Mittelwertvergleich der nächtlichen Lärmbelastung  $L_n$  bewohnter Gebäude der Innsbrucker Katastralgemeinden nach Quelle in dB**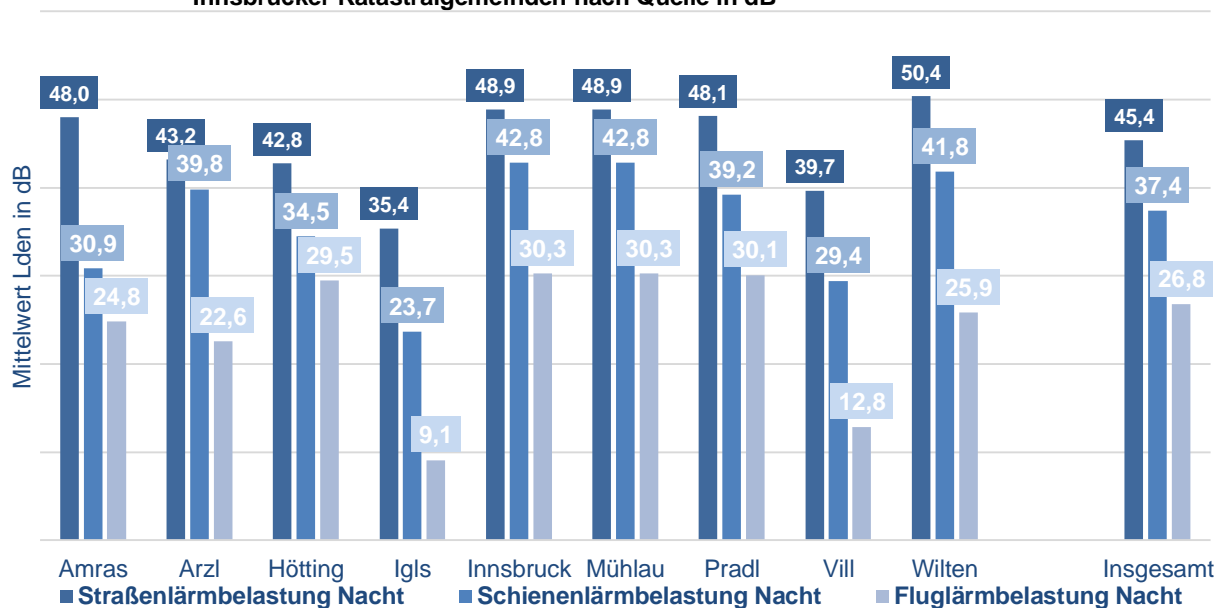

Der Flugverkehrslärm in der Nacht stellt im gesamten Stadtgebiet von Innsbruck keine erhebliche Belastung dar und sinkt auch in der im 24h-Pegel am stärksten belasteten Katastralgemeinde Hötting unter die 30dB-Pegelgrenze. Igls und Vill sind auch im Nachtzeitraum – sowohl nach einzelnen Verkehrsträgern, als auch insgesamt – die ruhigsten Katastralgemeinden der Stadt Innsbruck.

Im Detail ist die Gegenüberstellung aller 9711 bewohnten Adresspunkte Innsbrucks mit dem befragten Kollektiv (N=1031) geordnet nach Verkehrslärmquellen aus der nachfolgenden Tabelle abzulesen:

**Tabelle 13: Mittelwerte der nächtlichen Lärmbelastung  $L_n$  der Innsbrucker Katastralgemeinden nach Quelle in dB (Innsbruck gesamt und Befragte gegenübergestellt)**

| Katastralgemeinde |                         | Straßenlärm<br>Nacht IBK | Straßenlärm<br>Nacht<br>Befragte | Schienenlärm<br>Nacht IBK | Schienenlärm<br>Nacht<br>Befragte | Fluglärm<br>Nacht IBK | Fluglärm<br>Nacht<br>Befragte |
|-------------------|-------------------------|--------------------------|----------------------------------|---------------------------|-----------------------------------|-----------------------|-------------------------------|
| Amras             | N                       | 496                      | 60                               | 496                       | 60                                | 496                   | 60                            |
|                   | <b>Mittelwert in dB</b> | <b>48,025</b>            | <b>46,8500</b>                   | <b>30,854</b>             | <b>33,9667</b>                    | <b>24,847</b>         | <b>25,4967</b>                |
|                   | Median                  | 47,450                   | 46,6000                          | 32,150                    | 33,8500                           | 24,100                | 24,3000                       |
|                   | Standardabweichung      | 5,1096                   | 4,27831                          | 6,7256                    | 4,90516                           | 3,1161                | 3,10177                       |
|                   | Minimum                 | 39,4                     | 41,00                            | 3,1                       | 17,90                             | 17,6                  | 20,50                         |
|                   | Maximum                 | 65,5                     | 56,80                            | 44,2                      | 44,00                             | 33,1                  | 30,00                         |
| Arzl              | N                       | 890                      | 102                              | 890                       | 102                               | 890                   | 102                           |
|                   | <b>Mittelwert</b>       | <b>43,209</b>            | <b>41,9284</b>                   | <b>39,838</b>             | <b>38,6000</b>                    | <b>22,592</b>         | <b>23,1039</b>                |
|                   | Median                  | 42,400                   | 42,1000                          | 38,950                    | 37,8000                           | 21,100                | 21,0000                       |
|                   | Standardabweichung      | 6,3116                   | 6,08937                          | 5,5787                    | 5,57645                           | 4,3017                | 5,24559                       |
|                   | Minimum                 | 15,3                     | 15,30                            | 26,3                      | 26,30                             | 11,7                  | 12,60                         |
|                   | Maximum                 | 63,0                     | 54,80                            | 66,5                      | 54,80                             | 31,5                  | 31,40                         |
| Hötting           | N                       | 3178                     | 243                              | 3178                      | 243                               | 3178                  | 243                           |
|                   | <b>Mittelwert</b>       | <b>42,770</b>            | <b>42,5391</b>                   | <b>34,476</b>             | <b>33,8374</b>                    | <b>29,474</b>         | <b>31,4189</b>                |
|                   | Median                  | 42,400                   | 43,2000                          | 33,700                    | 33,1000                           | 28,800                | 32,4000                       |
|                   | Standardabweichung      | 6,6180                   | 7,64341                          | 5,2817                    | 4,99631                           | 7,0919                | 8,21588                       |
|                   | Minimum                 | 21,9                     | 22,20                            | ,9                        | 20,50                             | 12,1                  | 13,40                         |
|                   | Maximum                 | 60,3                     | 57,80                            | 53,4                      | 51,90                             | 49,5                  | 47,70                         |
| Igls              | N                       | 435                      | 35                               | 435                       | 35                                | 435                   | 35                            |
|                   | <b>Mittelwert</b>       | <b>35,401</b>            | <b>32,3857</b>                   | <b>23,707</b>             | <b>24,3114</b>                    | <b>9,100</b>          | <b>9,3629</b>                 |
|                   | Median                  | 33,800                   | 31,6000                          | 25,700                    | 25,2000                           | 9,300                 | 9,7000                        |
|                   | Standardabweichung      | 7,3991                   | 4,84040                          | 7,6207                    | 5,75616                           | 1,4287                | 1,02959                       |
|                   | Minimum                 | 21,2                     | 24,00                            | 0,0                       | 10,60                             | 2,9                   | 7,50                          |
|                   | Maximum                 | 54,6                     | 47,70                            | 33,8                      | 31,90                             | 12,9                  | 11,30                         |
| Innsbruck         | N                       | 1240                     | 176                              | 1240                      | 176                               | 1240                  | 176                           |
|                   | <b>Mittelwert</b>       | <b>48,880</b>            | <b>48,7943</b>                   | <b>42,820</b>             | <b>43,3034</b>                    | <b>30,285</b>         | <b>29,9455</b>                |
|                   | Median                  | 49,500                   | 47,7000                          | 43,400                    | 44,2000                           | 29,650                | 29,0500                       |
|                   | Standardabweichung      | 6,5632                   | 6,48376                          | 7,8254                    | 8,04606                           | 5,3037                | 4,95196                       |
|                   | Minimum                 | 35,2                     | 35,70                            | 29,7                      | 30,00                             | 21,4                  | 22,40                         |
|                   | Maximum                 | 61,3                     | 61,10                            | 66,9                      | 58,40                             | 40,7                  | 40,30                         |
| Mühlau            | N                       | 429                      | 50                               | 429                       | 50                                | 429                   | 50                            |
|                   | <b>Mittelwert</b>       | <b>43,811</b>            | <b>40,1020</b>                   | <b>42,171</b>             | <b>42,2560</b>                    | <b>20,378</b>         | <b>18,0180</b>                |
|                   | Median                  | 43,800                   | 38,8000                          | 42,100                    | 43,0500                           | 19,200                | 17,9000                       |
|                   | Standardabweichung      | 9,2773                   | 6,46250                          | 4,8089                    | 2,26465                           | 4,9396                | 1,03227                       |
|                   | Minimum                 | 24,3                     | 29,90                            | 26,8                      | 35,30                             | 11,7                  | 16,20                         |
|                   | Maximum                 | 64,2                     | 59,20                            | 61,8                      | 45,50                             | 31,4                  | 21,10                         |
| Pradl             | N                       | 1649                     | 188                              | 1649                      | 188                               | 1649                  | 188                           |
|                   | <b>Mittelwert</b>       | <b>48,134</b>            | <b>48,7793</b>                   | <b>39,245</b>             | <b>39,4037</b>                    | <b>30,091</b>         | <b>29,8798</b>                |
|                   | Median                  | 47,300                   | 47,1500                          | 38,900                    | 38,8000                           | 30,700                | 30,9000                       |
|                   | Standardabweichung      | 5,4362                   | 5,57047                          | 4,8588                    | 5,10951                           | 3,8449                | 3,63655                       |
|                   | Minimum                 | 34,8                     | 37,10                            | 28,2                      | 29,40                             | 19,8                  | 21,80                         |
|                   | Maximum                 | 64,9                     | 63,30                            | 57,9                      | 57,90                             | 36,1                  | 36,00                         |
| Vill              | N                       | 143                      | 21                               | 143                       | 21                                | 143                   | 21                            |
|                   | <b>Mittelwert</b>       | <b>39,691</b>            | <b>39,1762</b>                   | <b>29,438</b>             | <b>28,8048</b>                    | <b>12,849</b>         | <b>12,8333</b>                |
|                   | Median                  | 39,000                   | 37,7000                          | 27,800                    | 27,9000                           | 12,900                | 13,0000                       |



|                  |                    |               |                |               |                |               |                |
|------------------|--------------------|---------------|----------------|---------------|----------------|---------------|----------------|
|                  | Standardabweichung | 5,6878        | 3,78958        | 6,9836        | 2,29401        | 1,6706        | 1,29009        |
|                  | Minimum            | 28,2          | 34,30          | 19,8          | 26,70          | 8,2           | 11,00          |
|                  | Maximum            | 59,2          | 47,10          | 71,7          | 35,00          | 16,0          | 15,70          |
| <b>Wilten</b>    | N                  | 1251          | 156            | 1251          | 156            | 1251          | 156            |
|                  | <b>Mittelwert</b>  | <b>50,379</b> | <b>50,3353</b> | <b>41,815</b> | <b>41,1045</b> | <b>25,882</b> | <b>26,7635</b> |
|                  | Median             | 49,700        | 49,7000        | 41,100        | 38,8000        | 25,900        | 26,5500        |
|                  | Standardabweichung | 5,1468        | 4,14134        | 7,6783        | 7,67305        | 3,6059        | 3,78287        |
|                  | Minimum            | 37,2          | 41,60          | 30,0          | 31,30          | 15,8          | 19,40          |
|                  | Maximum            | 64,7          | 59,70          | 68,9          | 62,70          | 33,7          | 33,10          |
| <b>Insgesamt</b> | N                  | 9711          | 1031           | 9711          | 1031           | 9711          | 1031           |
|                  | <b>Mittelwert</b>  | <b>45,421</b> | <b>45,5835</b> | <b>37,386</b> | <b>38,0290</b> | <b>26,793</b> | <b>27,2378</b> |
|                  | Median             | 45,400        | 45,6000        | 36,500        | 36,9000        | 27,100        | 27,6000        |
|                  | Standardabweichung | 7,3539        | 7,46123        | 7,7932        | 7,54968        | 7,3489        | 7,46429        |
|                  | Minimum            | 15,3          | 15,30          | 0,0           | 10,60          | 2,9           | 7,50           |
|                  | Maximum            | 65,5          | 63,30          | 71,7          | 62,70          | 49,5          | 47,70          |

Wird die nächtliche Verkehrslärmbelastung gruppiert in 3 Belastungskategorien und nach Quelle dargestellt, zeigt sich im Extremgruppenvergleich der stark belasteten Adresspunkte (Schallpegel  $L_n > 55\text{dB}$ ), dass die Katastralgemeinde Innsbruck den höchsten Anteil an stark vom Straßenverkehrslärm in der Nacht belasteten Wohngebäuden aufweist:

**Abbildung 19: In der Nacht stark verkehrslärmbelastete Adresspunkte in Innsbruck nach Quelle und Katastralgemeinde in Prozent**

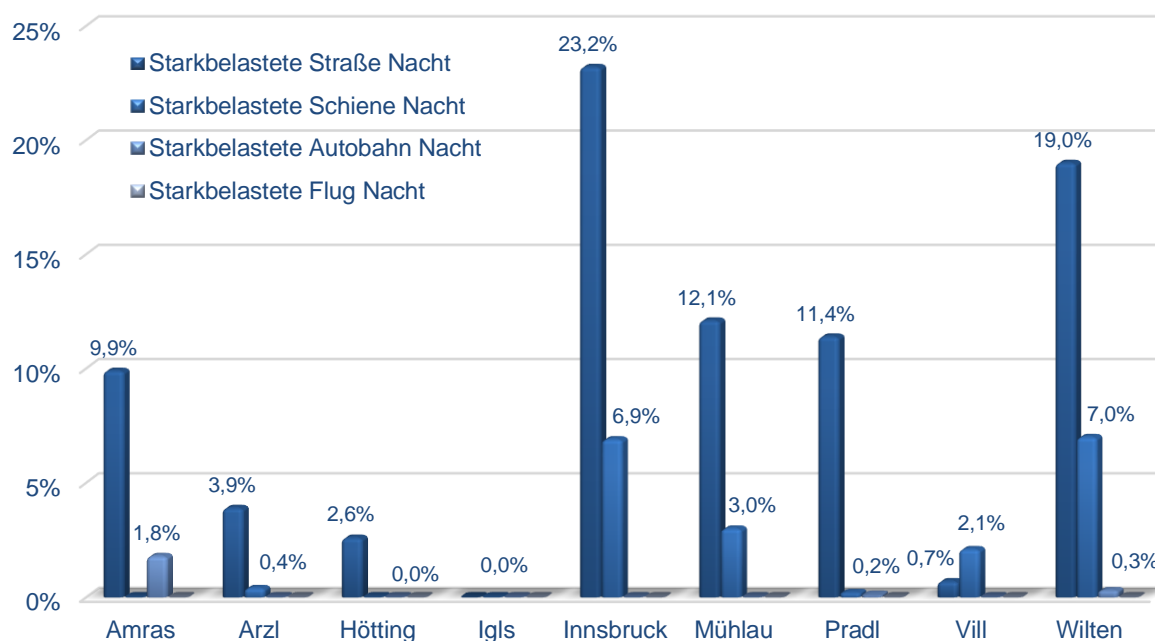

Auch in Wilten ist eine erhebliche Anzahl von Adresspunkten (238 Wohngebäude, was einem Anteil von 19% entspricht) auch in der Nacht starken Lärmpegeln aus dem Straßenverkehr ausgesetzt. Weiters sind Innsbruck und Wilten zum Teil (rund 7%) in der Nacht stark schienenverkehrs-lärmbelastet.

Stark vom Autobahn-lärm in der Nacht belastete Wohngebäude treten nur vereinzelt auf und liegen nur in den Katastralgemeinden Amras (9 Wohngebäude), Wilten (4 Wohngebäude) und Pradl (1 Wohngebäude). Stark vom Flugverkehrslärm belastete Gebäude gibt es im Nachtzeitraum in Innsbruck nicht. In Igls ist unabhängig von der Lärmquelle kein Adresspunkt von Nachtlärmpegeln über 55dB betroffen:

**Tabelle 14: Nächtliche Straßenlärmbelastung  $L_n$  in 3 Belastungskategorien nach Katastralgemeinde**

|                         |         | Katastralgemeinde |        |         |        |           |        |        |        |        |
|-------------------------|---------|-------------------|--------|---------|--------|-----------|--------|--------|--------|--------|
|                         |         | Amras             | Arzl   | Hötting | Igls   | Innsbruck | Mühlau | Pradl  | Vill   | Wilten |
| Starkbelastete > 55dB   | Anzahl  | 49                | 35     | 84      | 0      | 288       | 52     | 188    | 1      | 238    |
|                         | Prozent | 9,9%              | 3,9%   | 2,6%    | 0,0%   | 23,2%     | 12,1%  | 11,4%  | 0,7%   | 19,0%  |
| Mittelbelastete 45-55dB | Anzahl  | 290               | 271    | 1023    | 63     | 565       | 146    | 924    | 21     | 860    |
|                         | Prozent | 58,5%             | 30,4%  | 32,2%   | 14,5%  | 45,6%     | 34,0%  | 56,0%  | 14,7%  | 68,7%  |
| Geringbelastete < 45db  | Anzahl  | 157               | 584    | 2071    | 372    | 387       | 231    | 537    | 121    | 153    |
|                         | Prozent | 31,7%             | 65,6%  | 65,2%   | 85,5%  | 31,2%     | 53,8%  | 32,6%  | 84,6%  | 12,2%  |
| Gesamt                  | Anzahl  | 496               | 890    | 3178    | 435    | 1240      | 429    | 1649   | 143    | 1251   |
|                         | Prozent | 100,0%            | 100,0% | 100,0%  | 100,0% | 100,0%    | 100,0% | 100,0% | 100,0% | 100,0% |

**Tabelle 15: Nächtliche Schienenlärmbelastung  $L_n$  in 3 Belastungskategorien nach Katastralgemeinde**

|                         |         | Katastralgemeinde |        |         |        |           |        |        |        |        |
|-------------------------|---------|-------------------|--------|---------|--------|-----------|--------|--------|--------|--------|
|                         |         | Amras             | Arzl   | Hötting | Igls   | Innsbruck | Mühlau | Pradl  | Vill   | Wilten |
| Starkbelastete > 55dB   | Anzahl  | 0                 | 4      | 0       | 0      | 85        | 13     | 3      | 3      | 87     |
|                         | Prozent | 0,0%              | 0,4%   | 0,0%    | 0,0%   | 6,9%      | 3,0%   | 0,2%   | 2,1%   | 7,0%   |
| Mittelbelastete 45-55dB | Anzahl  | 0                 | 138    | 142     | 0      | 437       | 77     | 190    | 0      | 339    |
|                         | Prozent | 0,0%              | 15,5%  | 4,5%    | 0,0%   | 35,2%     | 17,9%  | 11,5%  | 0,0%   | 27,1%  |
| Geringbelastete < 45db  | Anzahl  | 496               | 748    | 3036    | 435    | 718       | 339    | 1456   | 140    | 825    |
|                         | Prozent | 100,0%            | 84,0%  | 95,5%   | 100,0% | 57,9%     | 79,0%  | 88,3%  | 97,9%  | 65,9%  |
| Gesamt                  | Anzahl  | 496               | 890    | 3178    | 435    | 1240      | 429    | 1649   | 143    | 1251   |
|                         | Prozent | 100,0%            | 100,0% | 100,0%  | 100,0% | 100,0%    | 100,0% | 100,0% | 100,0% | 100,0% |

**Tabelle 16: Nächtliche Autobahnlärmbelastung  $L_n$  in 3 Belastungskategorien n. Katastralgemeinde**

|                         |         | Katastralgemeinde |        |         |        |           |        |        |        |        |
|-------------------------|---------|-------------------|--------|---------|--------|-----------|--------|--------|--------|--------|
|                         |         | Amras             | Arzl   | Hötting | Igls   | Innsbruck | Mühlau | Pradl  | Vill   | Wilten |
| Starkbelastete > 55dB   | Anzahl  | 9                 | 0      | 0       | 0      | 0         | 0      | 1      | 0      | 4      |
|                         | Prozent | 1,8%              | 0,0%   | 0,0%    | 0,0%   | 0,0%      | 0,0%   | 0,1%   | 0,0%   | 0,3%   |
| Mittelbelastete 45-55dB | Anzahl  | 96                | 10     | 158     | 0      | 0         | 0      | 51     | 6      | 367    |
|                         | Prozent | 19,4%             | 1,1%   | 5,0%    | 0,0%   | 0,0%      | 0,0%   | 3,1%   | 4,2%   | 29,3%  |
| Geringbelastete < 45db  | Anzahl  | 391               | 880    | 3020    | 435    | 1240      | 429    | 1597   | 137    | 880    |
|                         | Prozent | 78,8%             | 98,9%  | 95,0%   | 100,0% | 100,0%    | 100,0% | 96,8%  | 95,8%  | 70,3%  |
| Gesamt                  | Anzahl  | 496               | 890    | 3178    | 435    | 1240      | 429    | 1649   | 143    | 1251   |
|                         | Prozent | 100,0%            | 100,0% | 100,0%  | 100,0% | 100,0%    | 100,0% | 100,0% | 100,0% | 100,0% |

**Tabelle 17: Nächtliche Fluglärmbelastung  $L_n$  in 3 Belastungskategorien nach Katastralgemeinde**

|                         |         | Katastralgemeinde |        |         |        |           |        |        |        |        |
|-------------------------|---------|-------------------|--------|---------|--------|-----------|--------|--------|--------|--------|
|                         |         | Amras             | Arzl   | Hötting | Igls   | Innsbruck | Mühlau | Pradl  | Vill   | Wilten |
| Mittelbelastete 45-55dB | Anzahl  | 0                 | 0      | 58      | 0      | 0         | 0      | 0      | 0      | 0      |
|                         | Prozent | 0,0%              | 0,0%   | 1,8%    | 0,0%   | 0,0%      | 0,0%   | 0,0%   | 0,0%   | 0,0%   |
| Geringbelastete < 45db  | Anzahl  | 496               | 890    | 3120    | 435    | 1240      | 429    | 1649   | 143    | 1251   |
|                         | Prozent | 100,0%            | 100,0% | 98,2%   | 100,0% | 100,0%    | 100,0% | 100,0% | 100,0% | 100,0% |
| Gesamt                  | Anzahl  | 496               | 890    | 3178    | 435    | 1240      | 429    | 1649   | 143    | 1251   |
|                         | Prozent | 100,0%            | 100,0% | 100,0%  | 100,0% | 100,0%    | 100,0% | 100,0% | 100,0% | 100,0% |

\* keine Starkbelasteten > 55dB vorhanden

# Gesamtlärbetrachtung Innsbruck

## 1. Prinzip und Limitationen

Unter Gesamtlärbetrachtung versteht man die gemeinsame Darstellung von Schallimmissionen aus unterschiedlichen Schallquellen. Dem Grunde nach ist die hier abgebildete Gesamtlärbetrachtung eine Verkehrslärbetrachtung, eben aus unterschiedlichen Verkehrslärmquellen. Andere nichtverkehrsinduzierte Schallquellen sind dabei nicht berücksichtigt. Weiters nicht berücksichtigt sind bodengebundene Schallquellen des Flughafens Innsbruck, wie das Betreiben der Triebwerke im Stand und auf dem Weg zum Start, Betrieb von Hilfseinrichtungen oder Triebwerksprobeläufe. Ebenfalls nicht berücksichtigt ist beim Schienenverkehrslärm die Geräuscentwicklung des Verschubbetriebes am Bahnhof Innsbruck, hier werden ausschließlich die Durchfahrten berücksichtigt. Für den Verschubbetrieb fehlen schlicht die Modellierungsdaten. Im Sinne der großräumigen Betrachtung und der konkreten Betroffenen sind beim Verschubbetrieb des Bahnhofs keine bedeutenden Abweichungen zu erwarten.

## 2. Zusammenführen von Schallbelastungen

Bei einer Gesamtlärbetrachtung kommen unterschiedliche Methoden in Frage. Eine Möglichkeit bildet die reine pegelenergetische Addition der Schallimmissionen der einzelnen Verkehrsträger. Diese Addition bringt zumindest theoretisch denselben Wert zu Tage, der bei demselben Emissionsverhalten aller Quellen und denselben meteorologischen Bedingungen eine Messung an diesem Punkt erbringen würde. Ein weiterer Ansatz der Gesamtlärmdarstellung ist der effektbezogene. Es ist ausreichend bewiesen, dass unterschiedliche Lärmquellen bei gleicher Einwirkung unterschiedlich starke Effekte hervorrufen, wie dies z. B. auch die EU konstatiert (*Position paper on dose response relationships between transportation noise and annoyance*, Office for Official Publications of the European Communities, Luxembourg 2002). Dem Index für die allgemeine Lärmbelastung  $L_{den}$ , liegt die (subjektive) Belästigungsreaktion Betroffener als Effekt zu Grunde. Ein Gesamtlärmmodell berücksichtigt nun, wie sich das Ausmaß der Belästigung im Einflussbereich einzelner konkreter Quellen abbildet und bringt dann bei Kombination mehrerer Quellen dasselbe Belästigungsäquivalent zu Tage. Dies kann dann wieder in Form eines Pegels zum Ausdruck gebracht werden, wobei hier eine einheitliche Bezeichnung noch nicht etabliert ist. So wird dieser wirkungsbezogene Gesamtlärmpegel im Good practice guide der EEA (European Environment Agency: *Good practice guide on noise exposure and potential health effects*, EEA Technical report Nr. 11/2010) als kumulierter Summenpegel bezeichnet, in VDI 3722 Blatt 2 (Verein Deutscher Ingenieure Richtlinie 3722 Blatt 2, *Wirkung von Verkehrsgeräuschen. Kenngrößen beim Einwirken mehrerer Quellenarten*, Berlin Mai 2013) als effektbezogener Substitutionspegel. Für die folgende Gesamtlärbetrachtung wird die Methode der VDI 3722 Blatt 2 angewandt.

Unabhängig von der Methode, sei es die rein physikalische oder effektbezogene Summenbildung, stellen die ermittelten Pegel im Rechenraster oder an den Gebäudefassaden ausgedrückt als  $L_{den}$  oder  $L_{night}$  die Basis für weitergehende Überlegungen. In der folgenden Abbildung ist die Rasterlärmkarte für den Autobahnverkehr als  $L_{den}$  dargestellt. Da es sich bei den sonstigen Straßen (Landesstraßen, Gemeindestraßen) in Innsbruck um dieselbe Lärmquelle handelt, werden die Berechnungsergebnisse für den  $L_{den}$  energetisch addiert:

Abbildung 20: Rasterlärmkarte für den Autobahnverkehr als  $L_{den}$  in 4 m Höhe

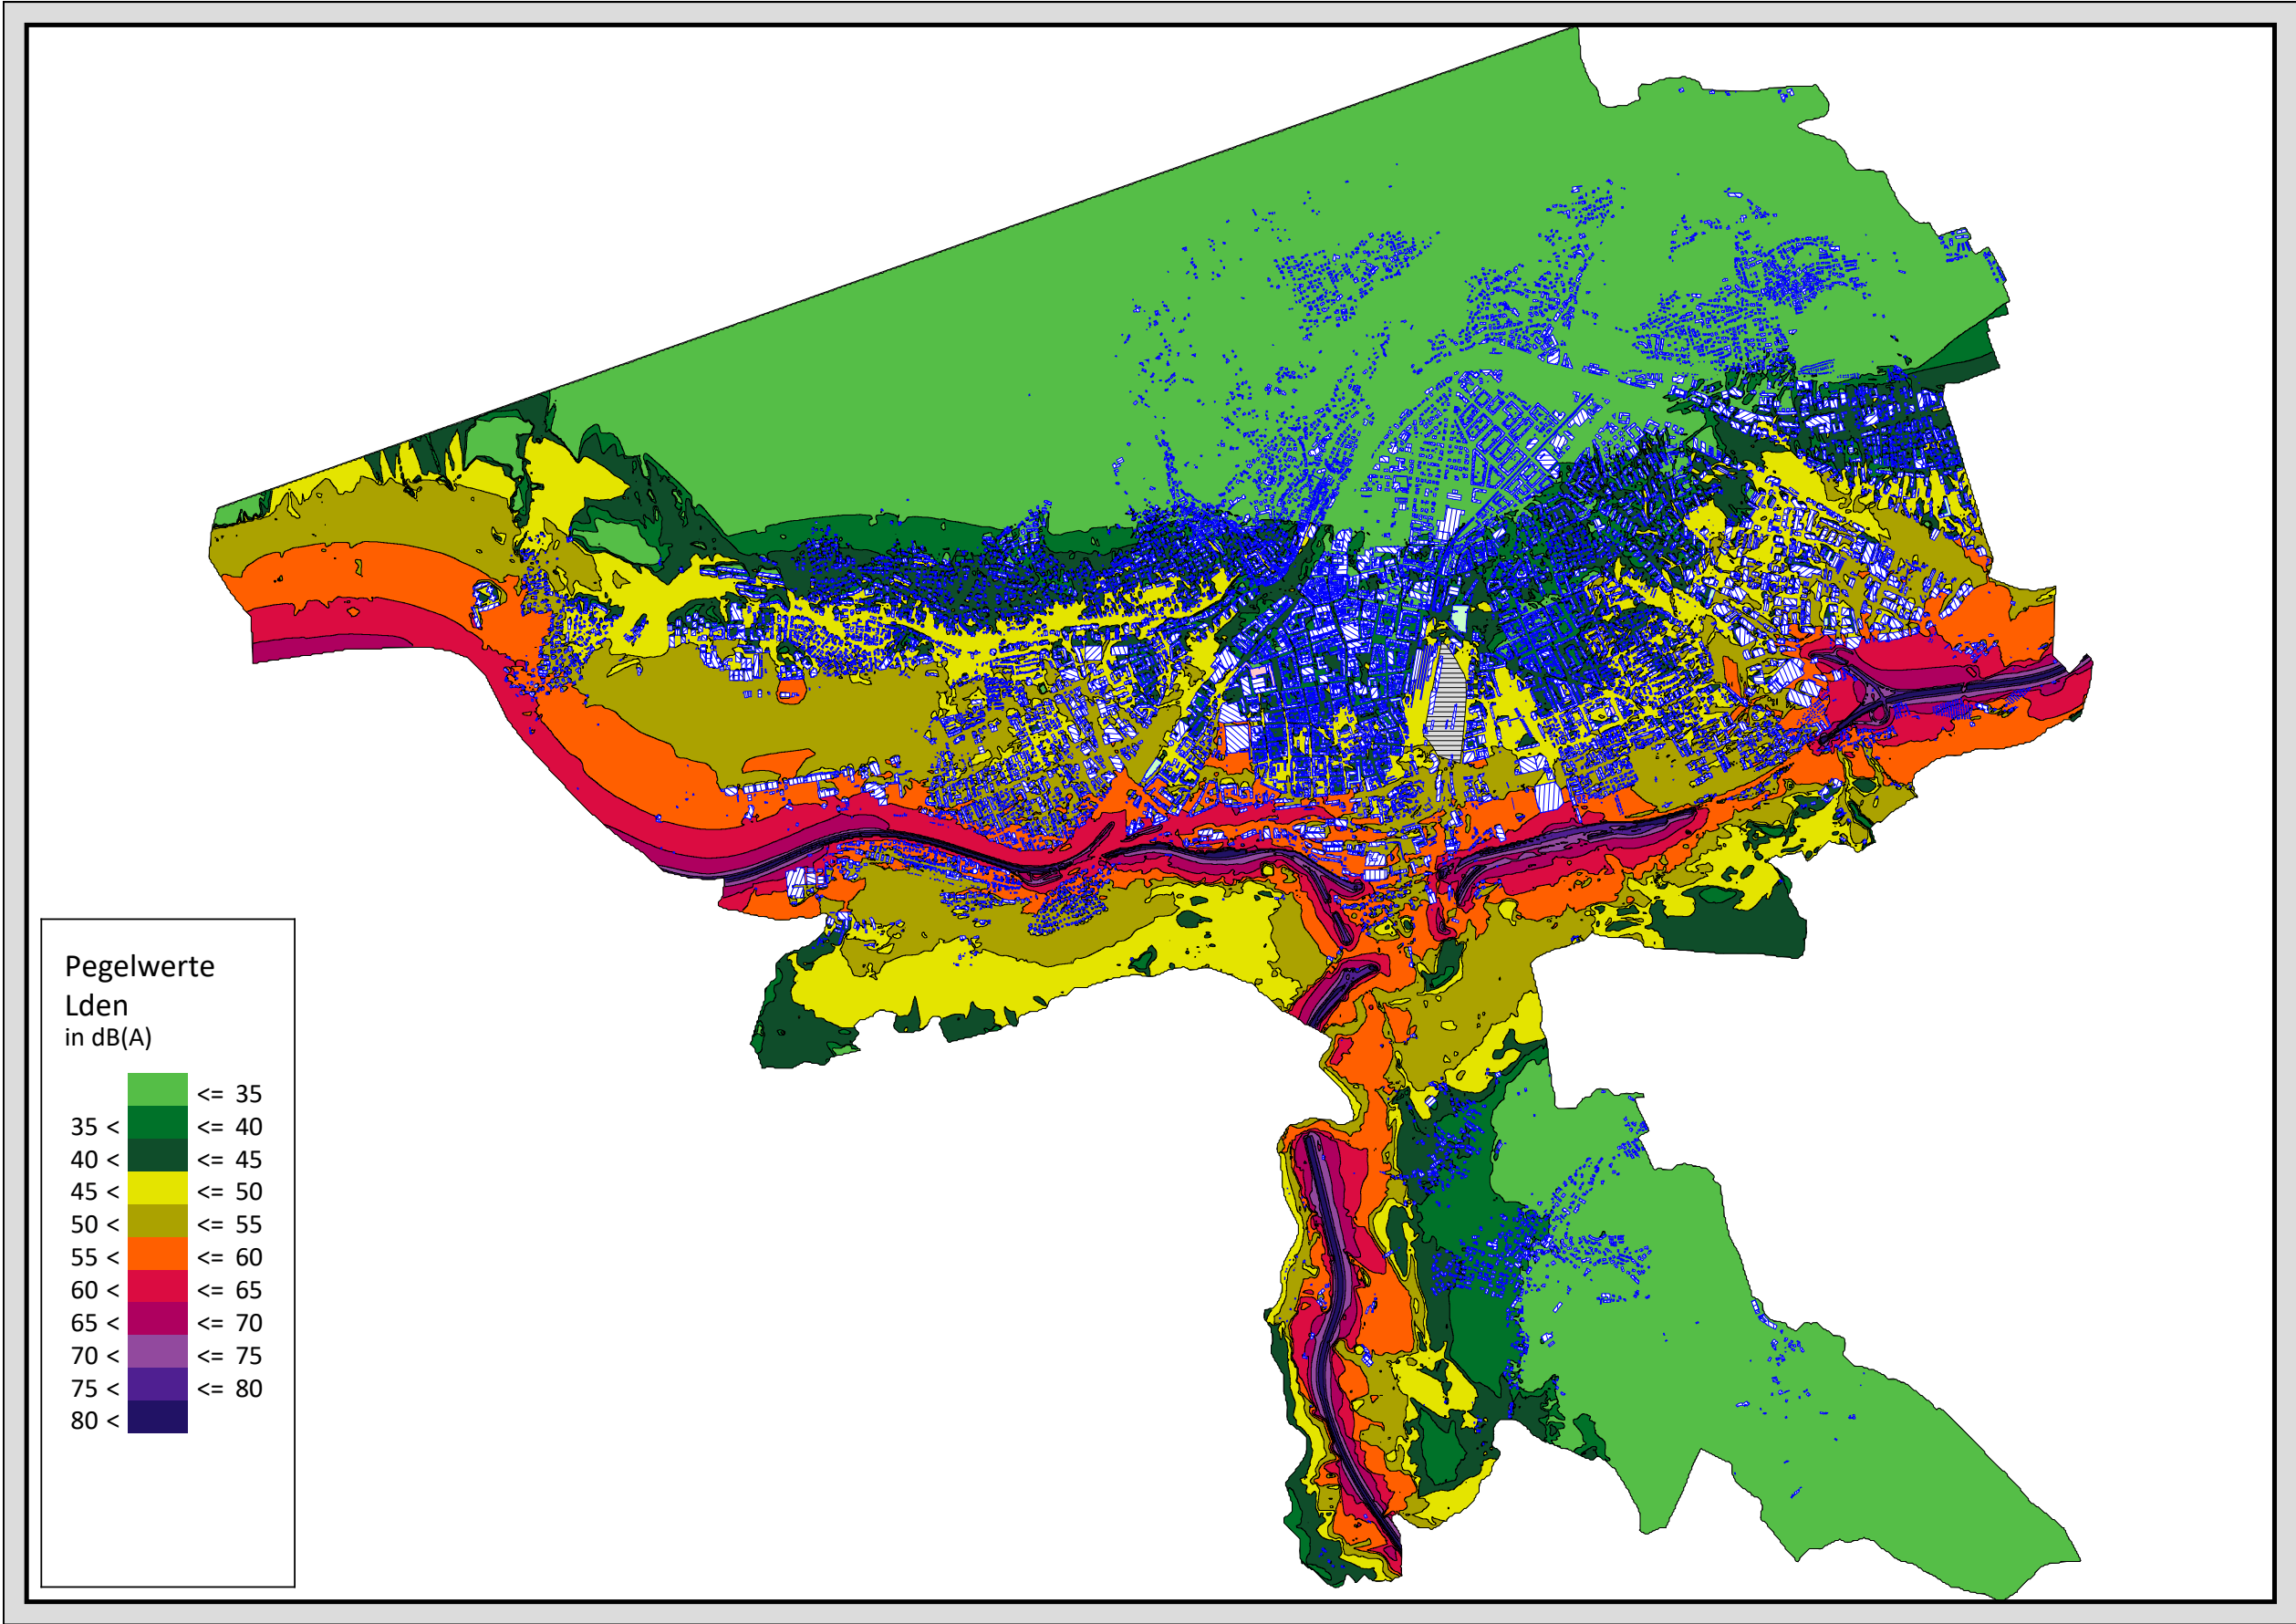



Abbildung 21: Rasterlärmkarte für den Straßenverkehr als  $L_{den}$  in 4 m Höhe

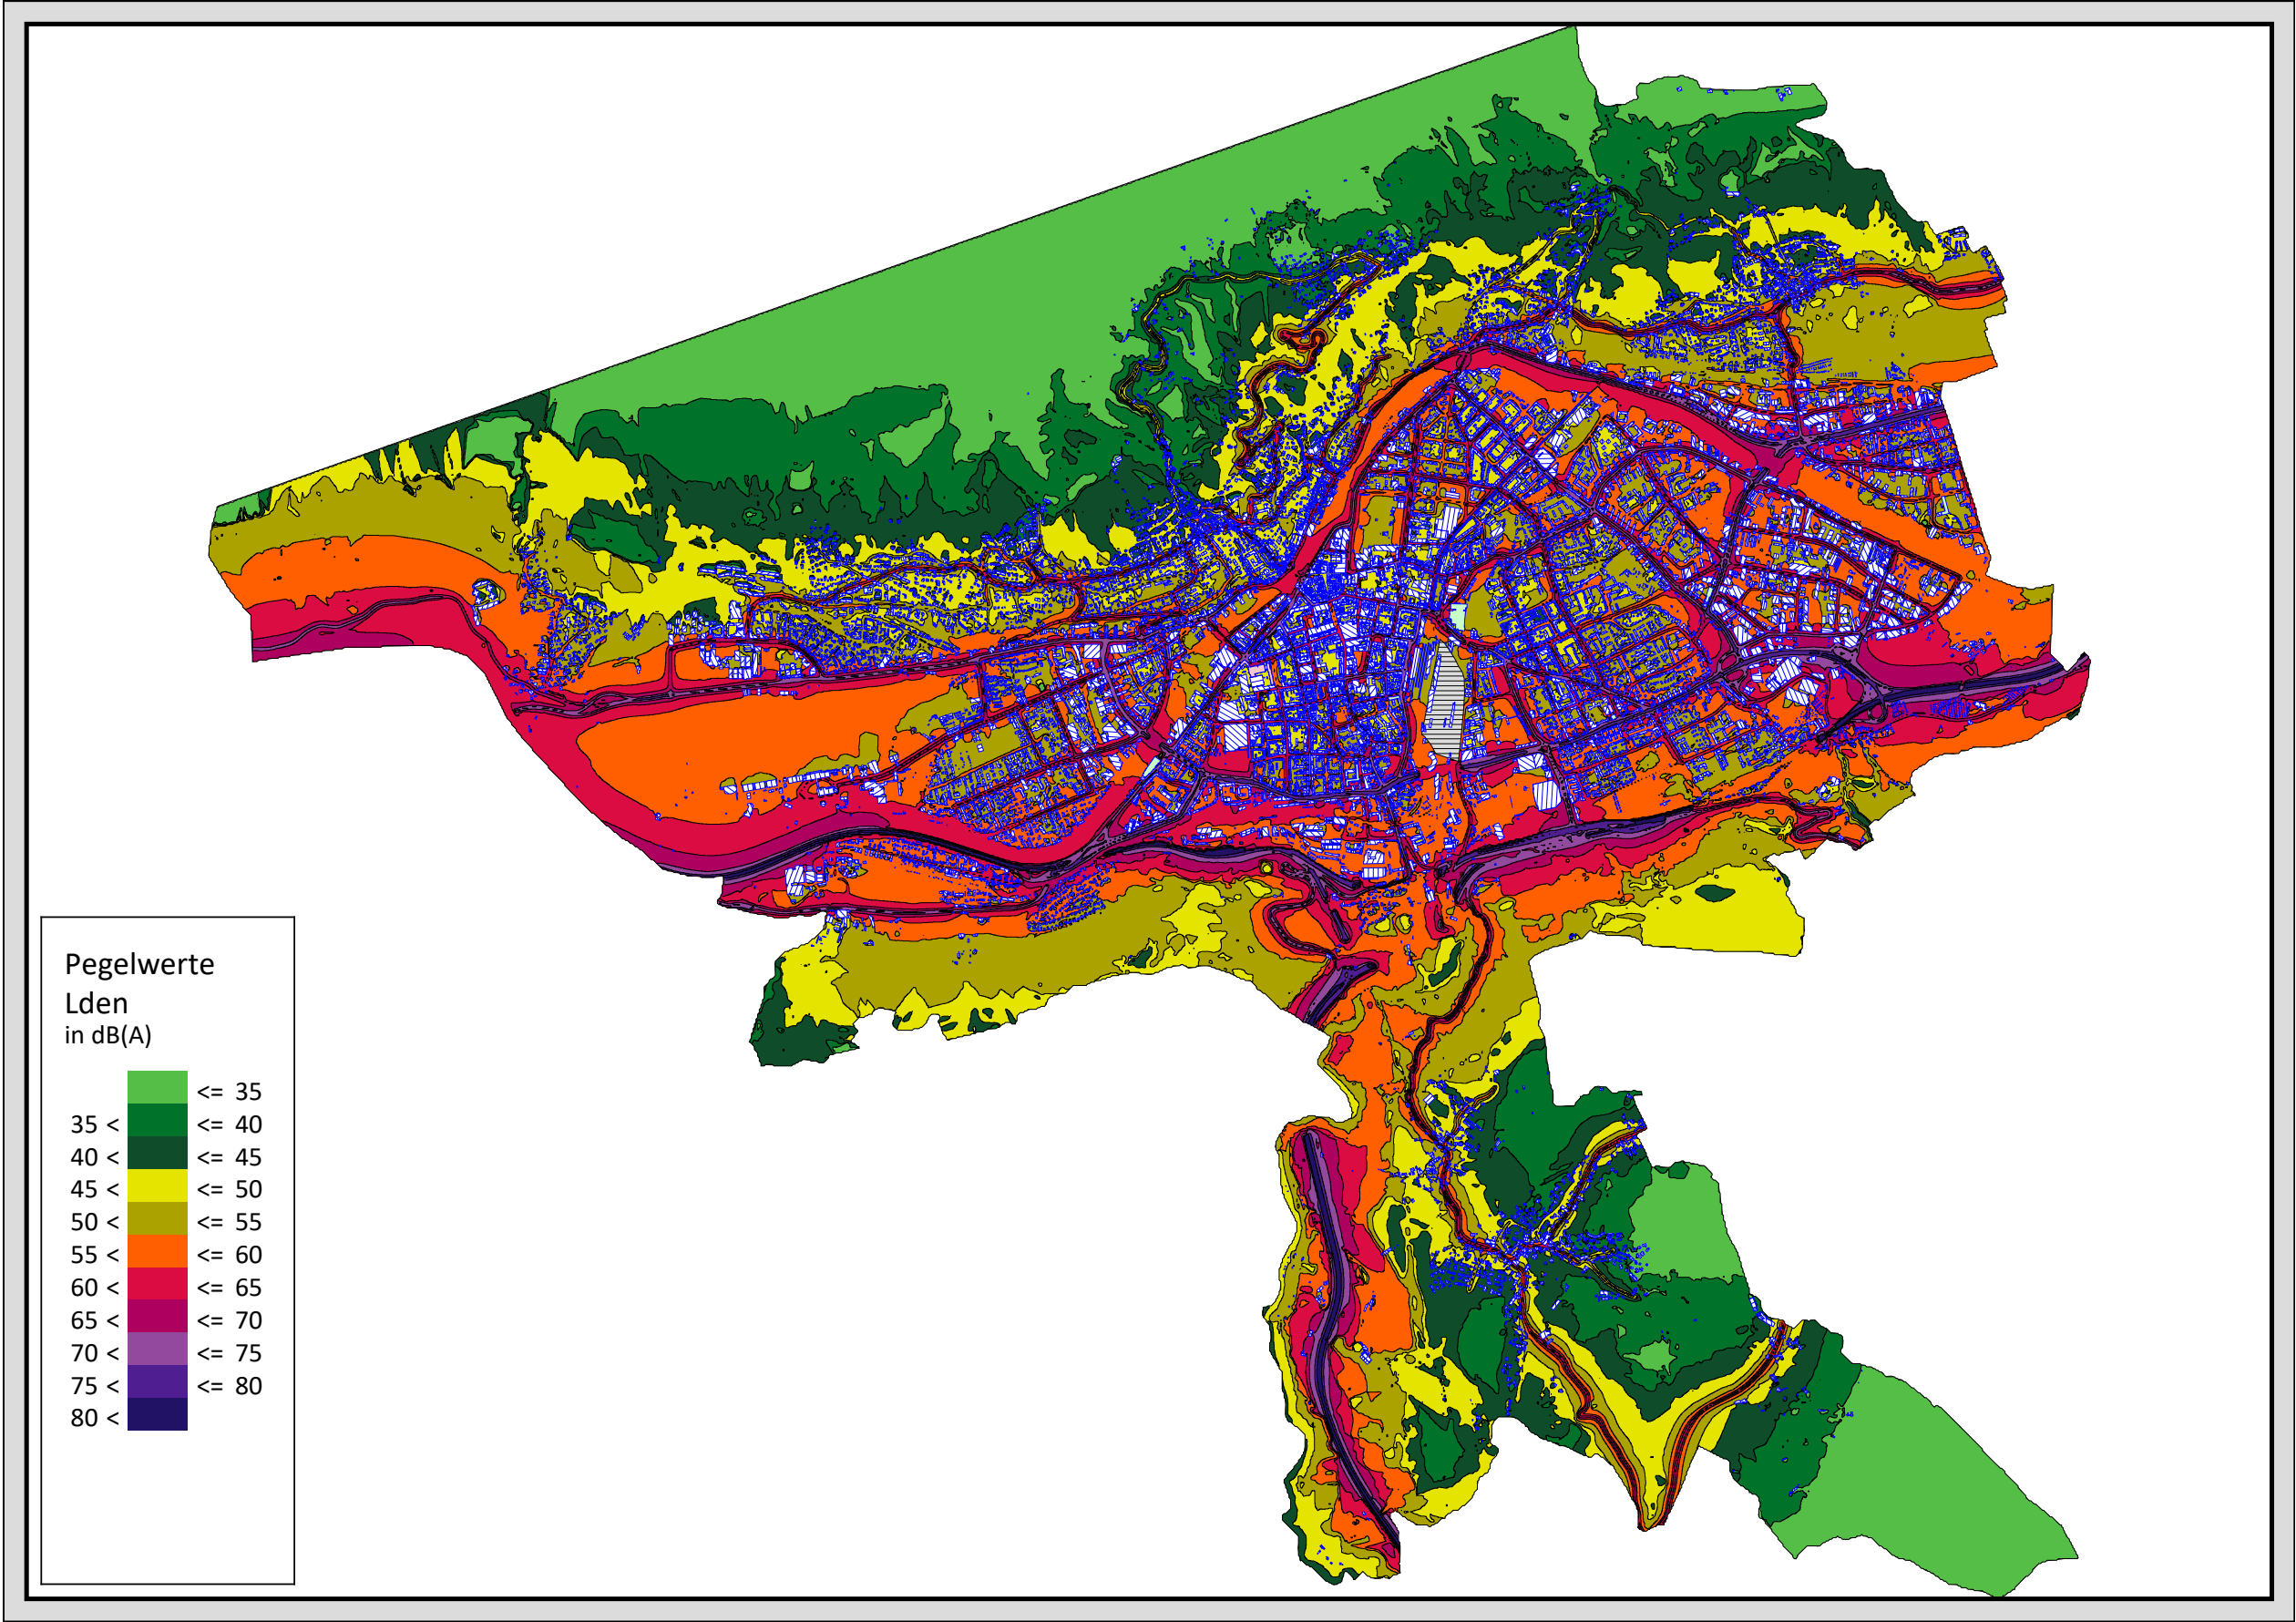

In obiger Abbildung erkennt man, dass im Nahbereich der Autobahn die Linien gleichen Schallpegels (auch Isophonen im Sinne Kurven gleicher Lautstärke genannt) wie in der ursprünglichen Abbildung verlaufen. In Bereichen fern der Autobahn dominieren nun die anderen Straßen. Dort wo es zur gemeinsamen Einwirkung von Autobahnlärm und Lärm aus anderen Straßen kommt, wie dies bei der Anschlussstelle Kranebitten deutlich ersichtlich wird, kommt es zur Überlagerung der Einwirkungen, wodurch zum Beispiel das gesamte Flughafenareal größtenteils von der Pegelzone 50 – 55 dB in die Pegelzone 55 – 60 dB rückt.

Dem Straßenverkehr kommt in der effektbezogenen Gesamtlärmbetrachtung eine besondere Bedeutung zu. Dadurch, dass unterschiedliche Quellen bei selbem Pegel unterschiedliche Effektgrößen erzielen, ist es notwendig, eine Referenzquelle zu definieren, auf die das Belästigungsäquivalent bezogen wird. Aus der Historie der Lärmwirkungsforschung bezieht sich das Belästigungsäquivalent auf die Referenzquelle Straßenverkehr. Der effektbezogene Pegel entspricht damit für Straßenverkehrslärm dem Lärminde $x$  für die allgemeine Lärmbelastung  $L_{den}$ .

## 2. Wirkungsbezogene Darstellung

Da beim Straßenverkehr mit der obigen Abbildung die wirkungsbezogene Datendarstellung bereits gegeben ist, bedarf es bei den beiden anderen untersuchten Schallquellen Flug und Schiene einer Umrechnung auf einen effektbezogenen Substitutionspegel. Die nachstehenden Abbildungen zeigen den Vergleich der Lärmbelastung ausgedrückt als Lärminde $x$  für die allgemeine Lärmbelastung  $L_{den}$  und als effektbezogener Substitutionspegel  $L_{A,ES}$  für Flug- und Schienenverkehr:

Abbildung 22: Rasterlärmkarte für den Flugverkehr als  $L_{den}$  in 4 m Höhe

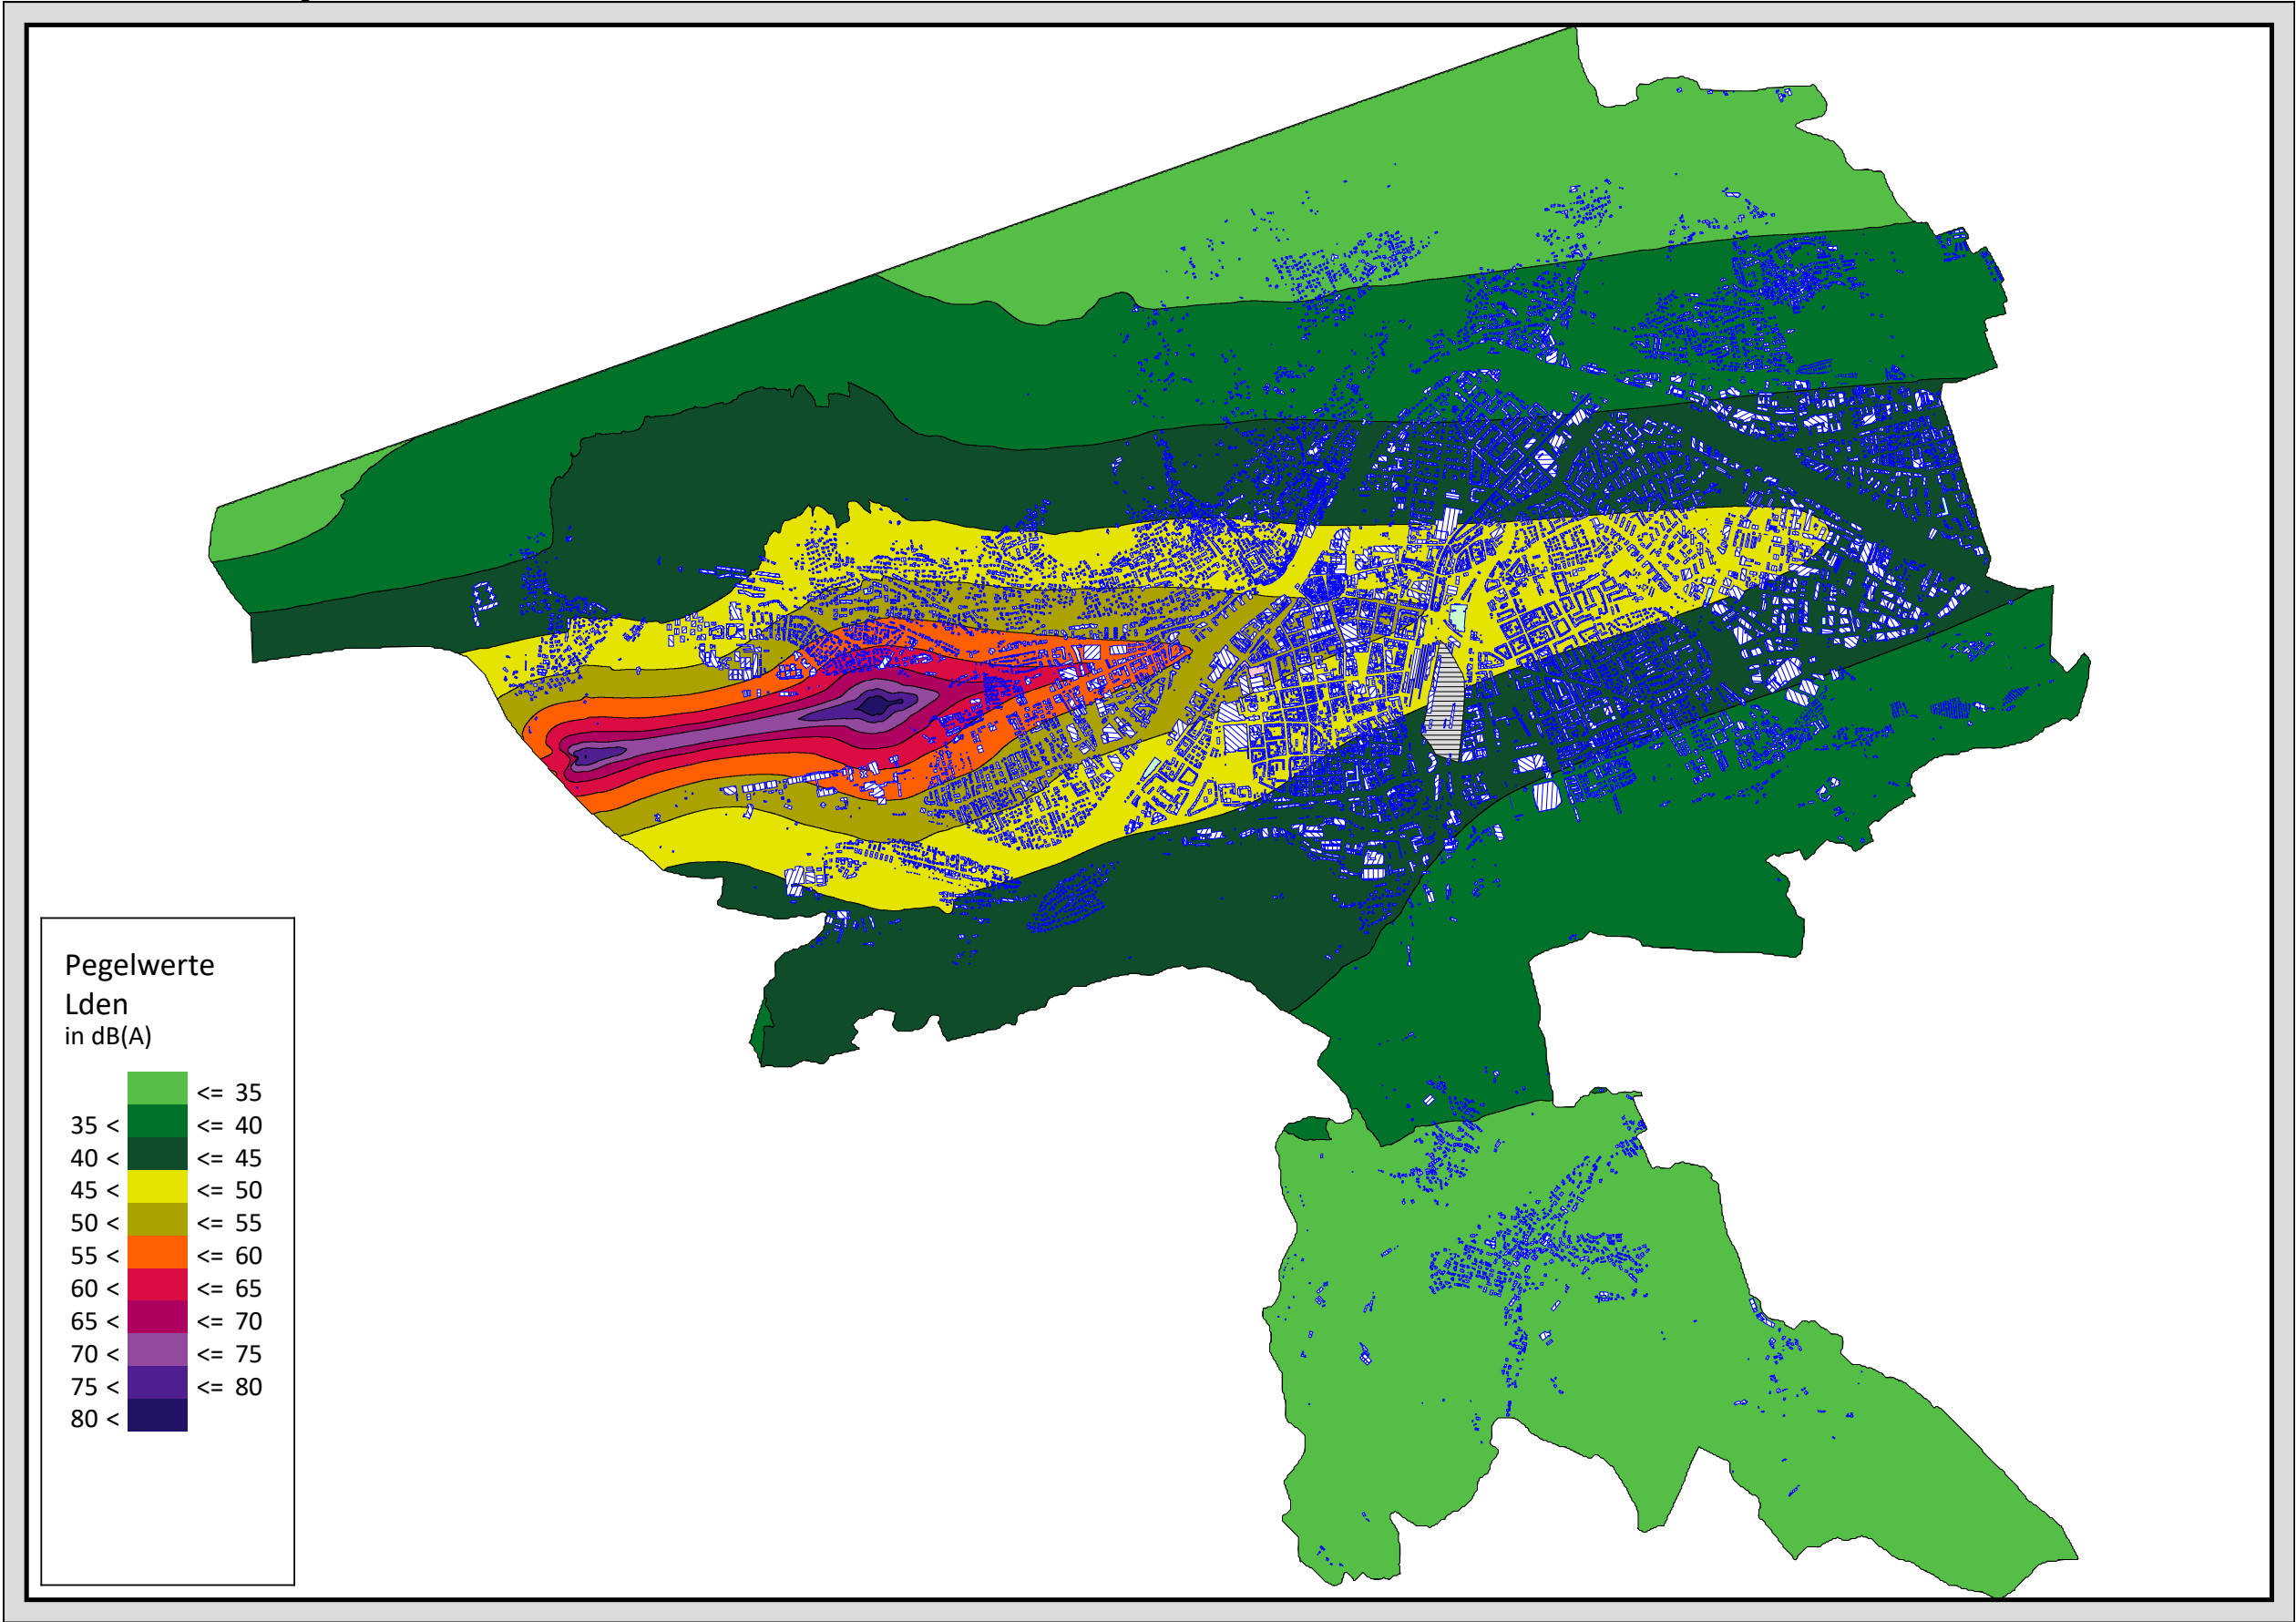



Abbildung 23: Rasterlärmkarte für den Flugverkehr als  $L_{A,ES}$  in 4 m Höhe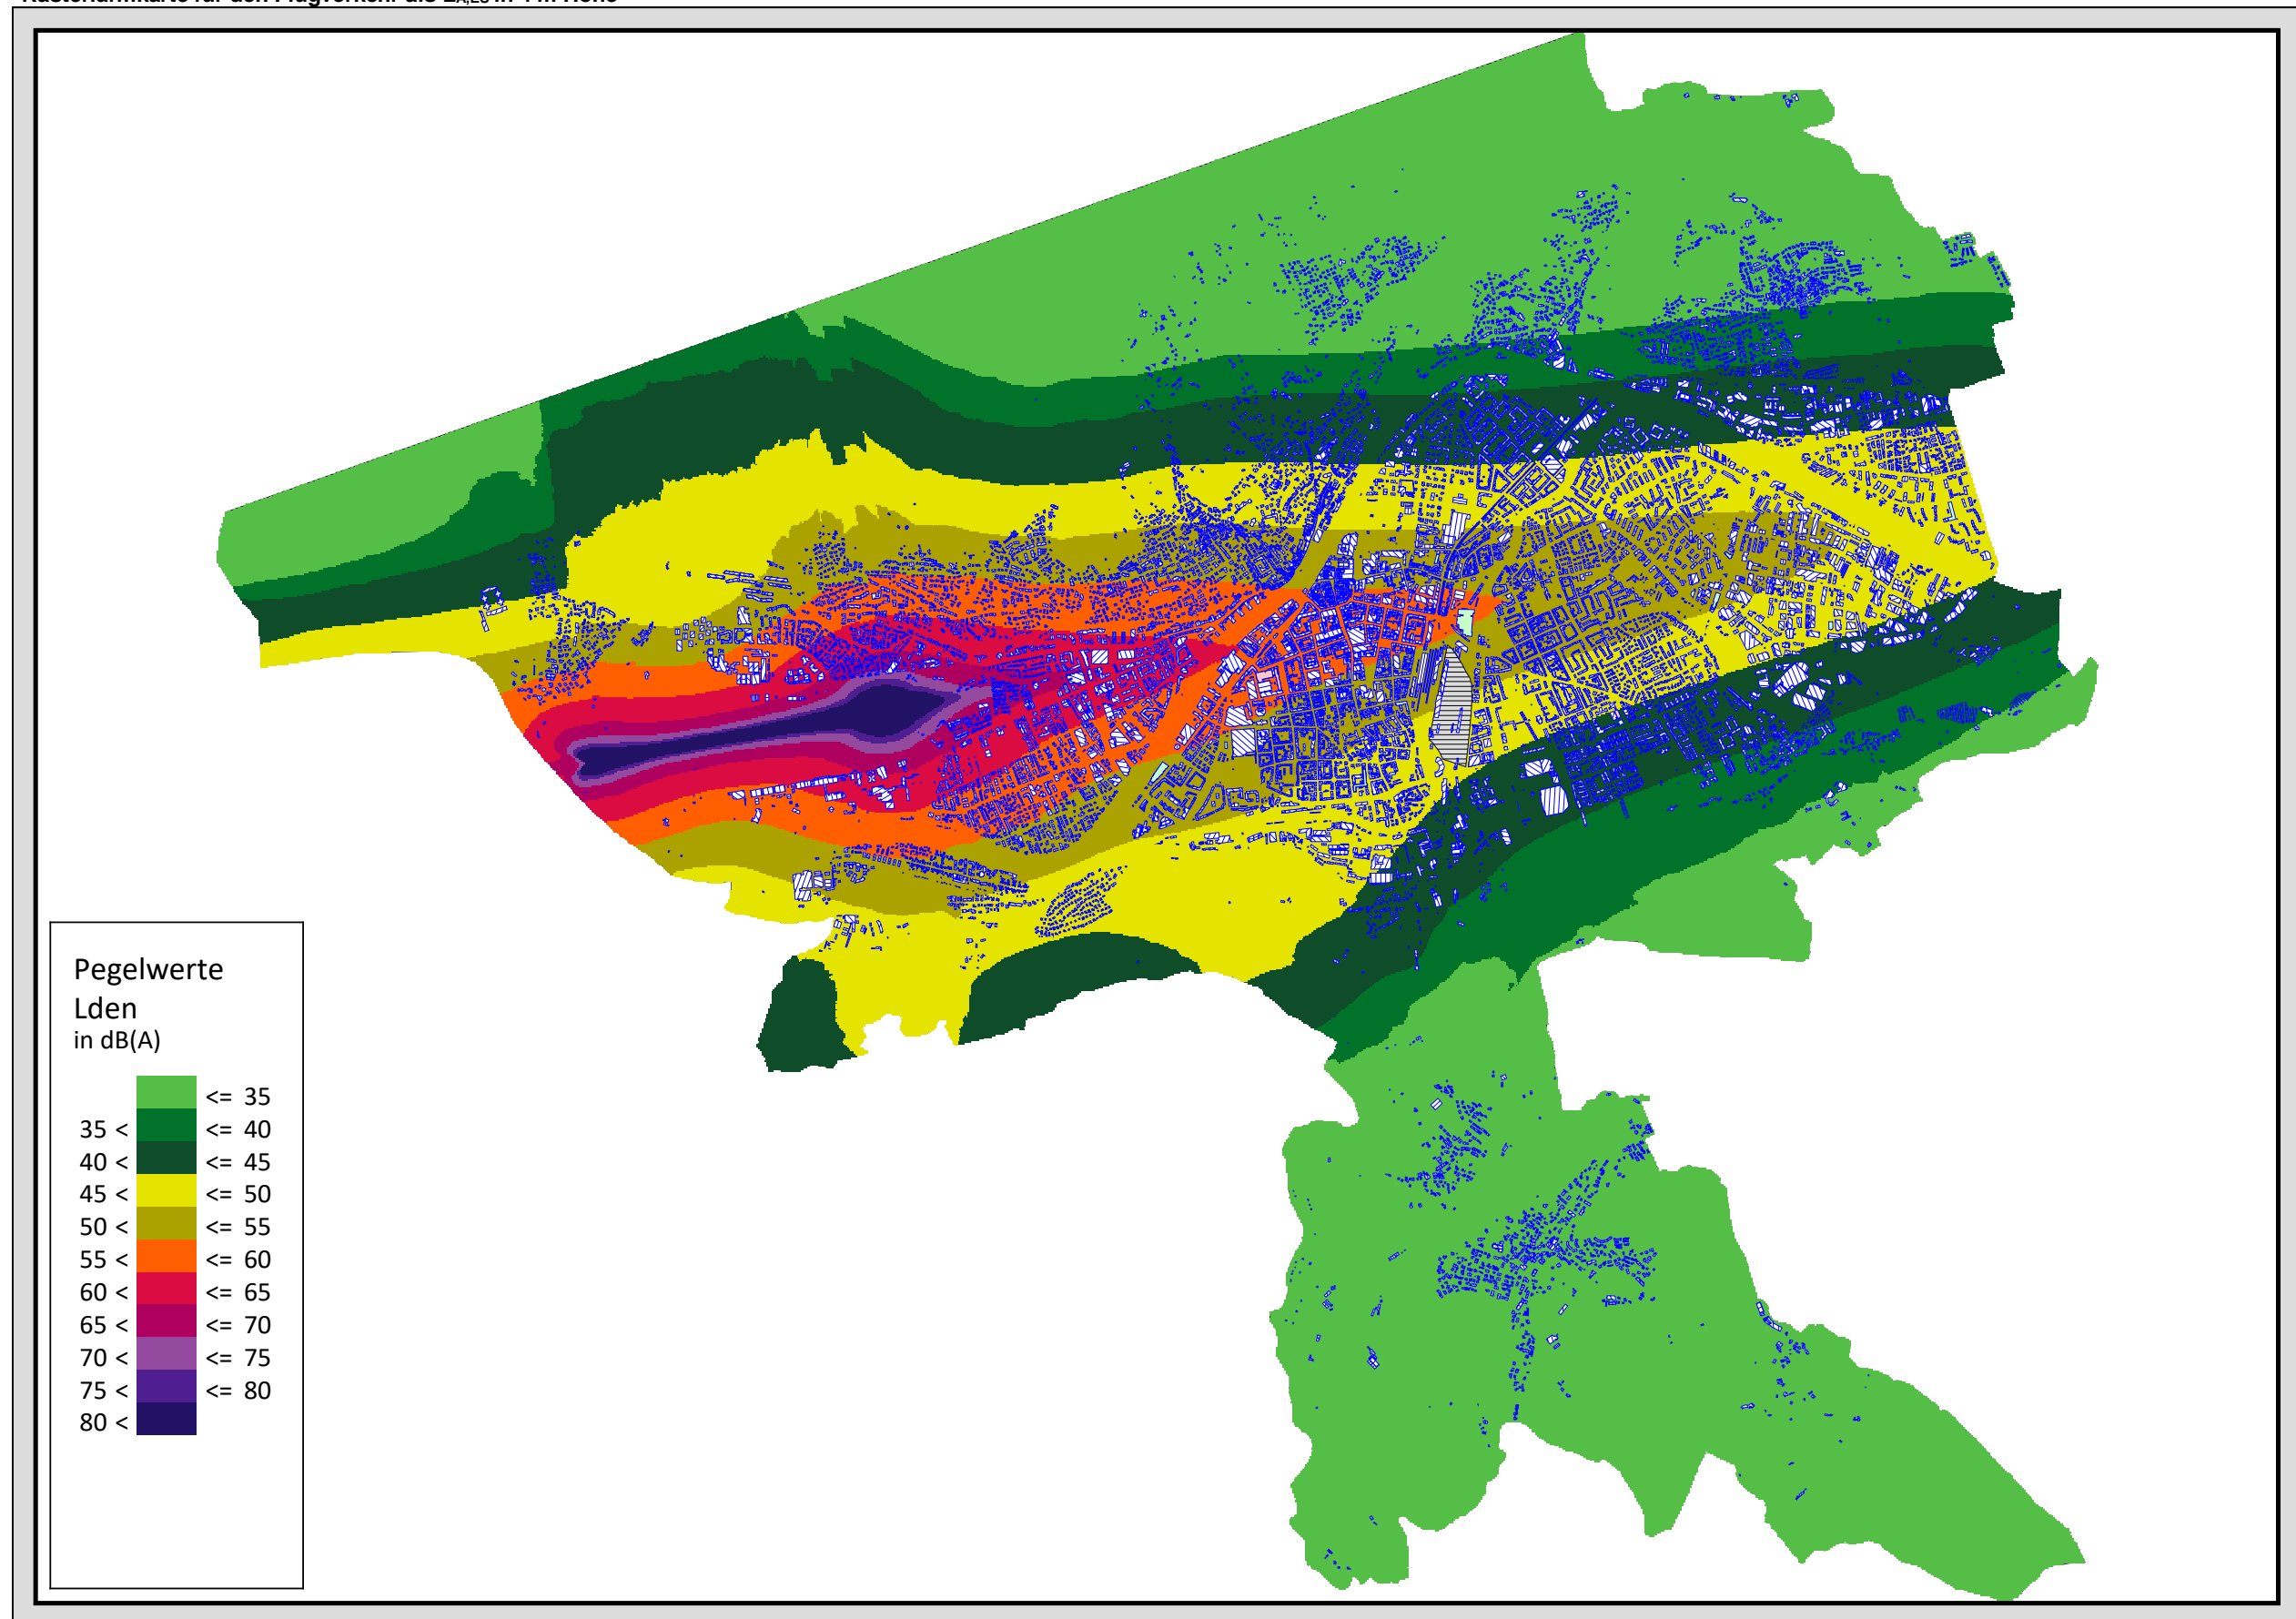

Abbildung 24: Rasterlärmkarte für den Schienenverkehr als  $L_{den}$  in 4 m Höhe

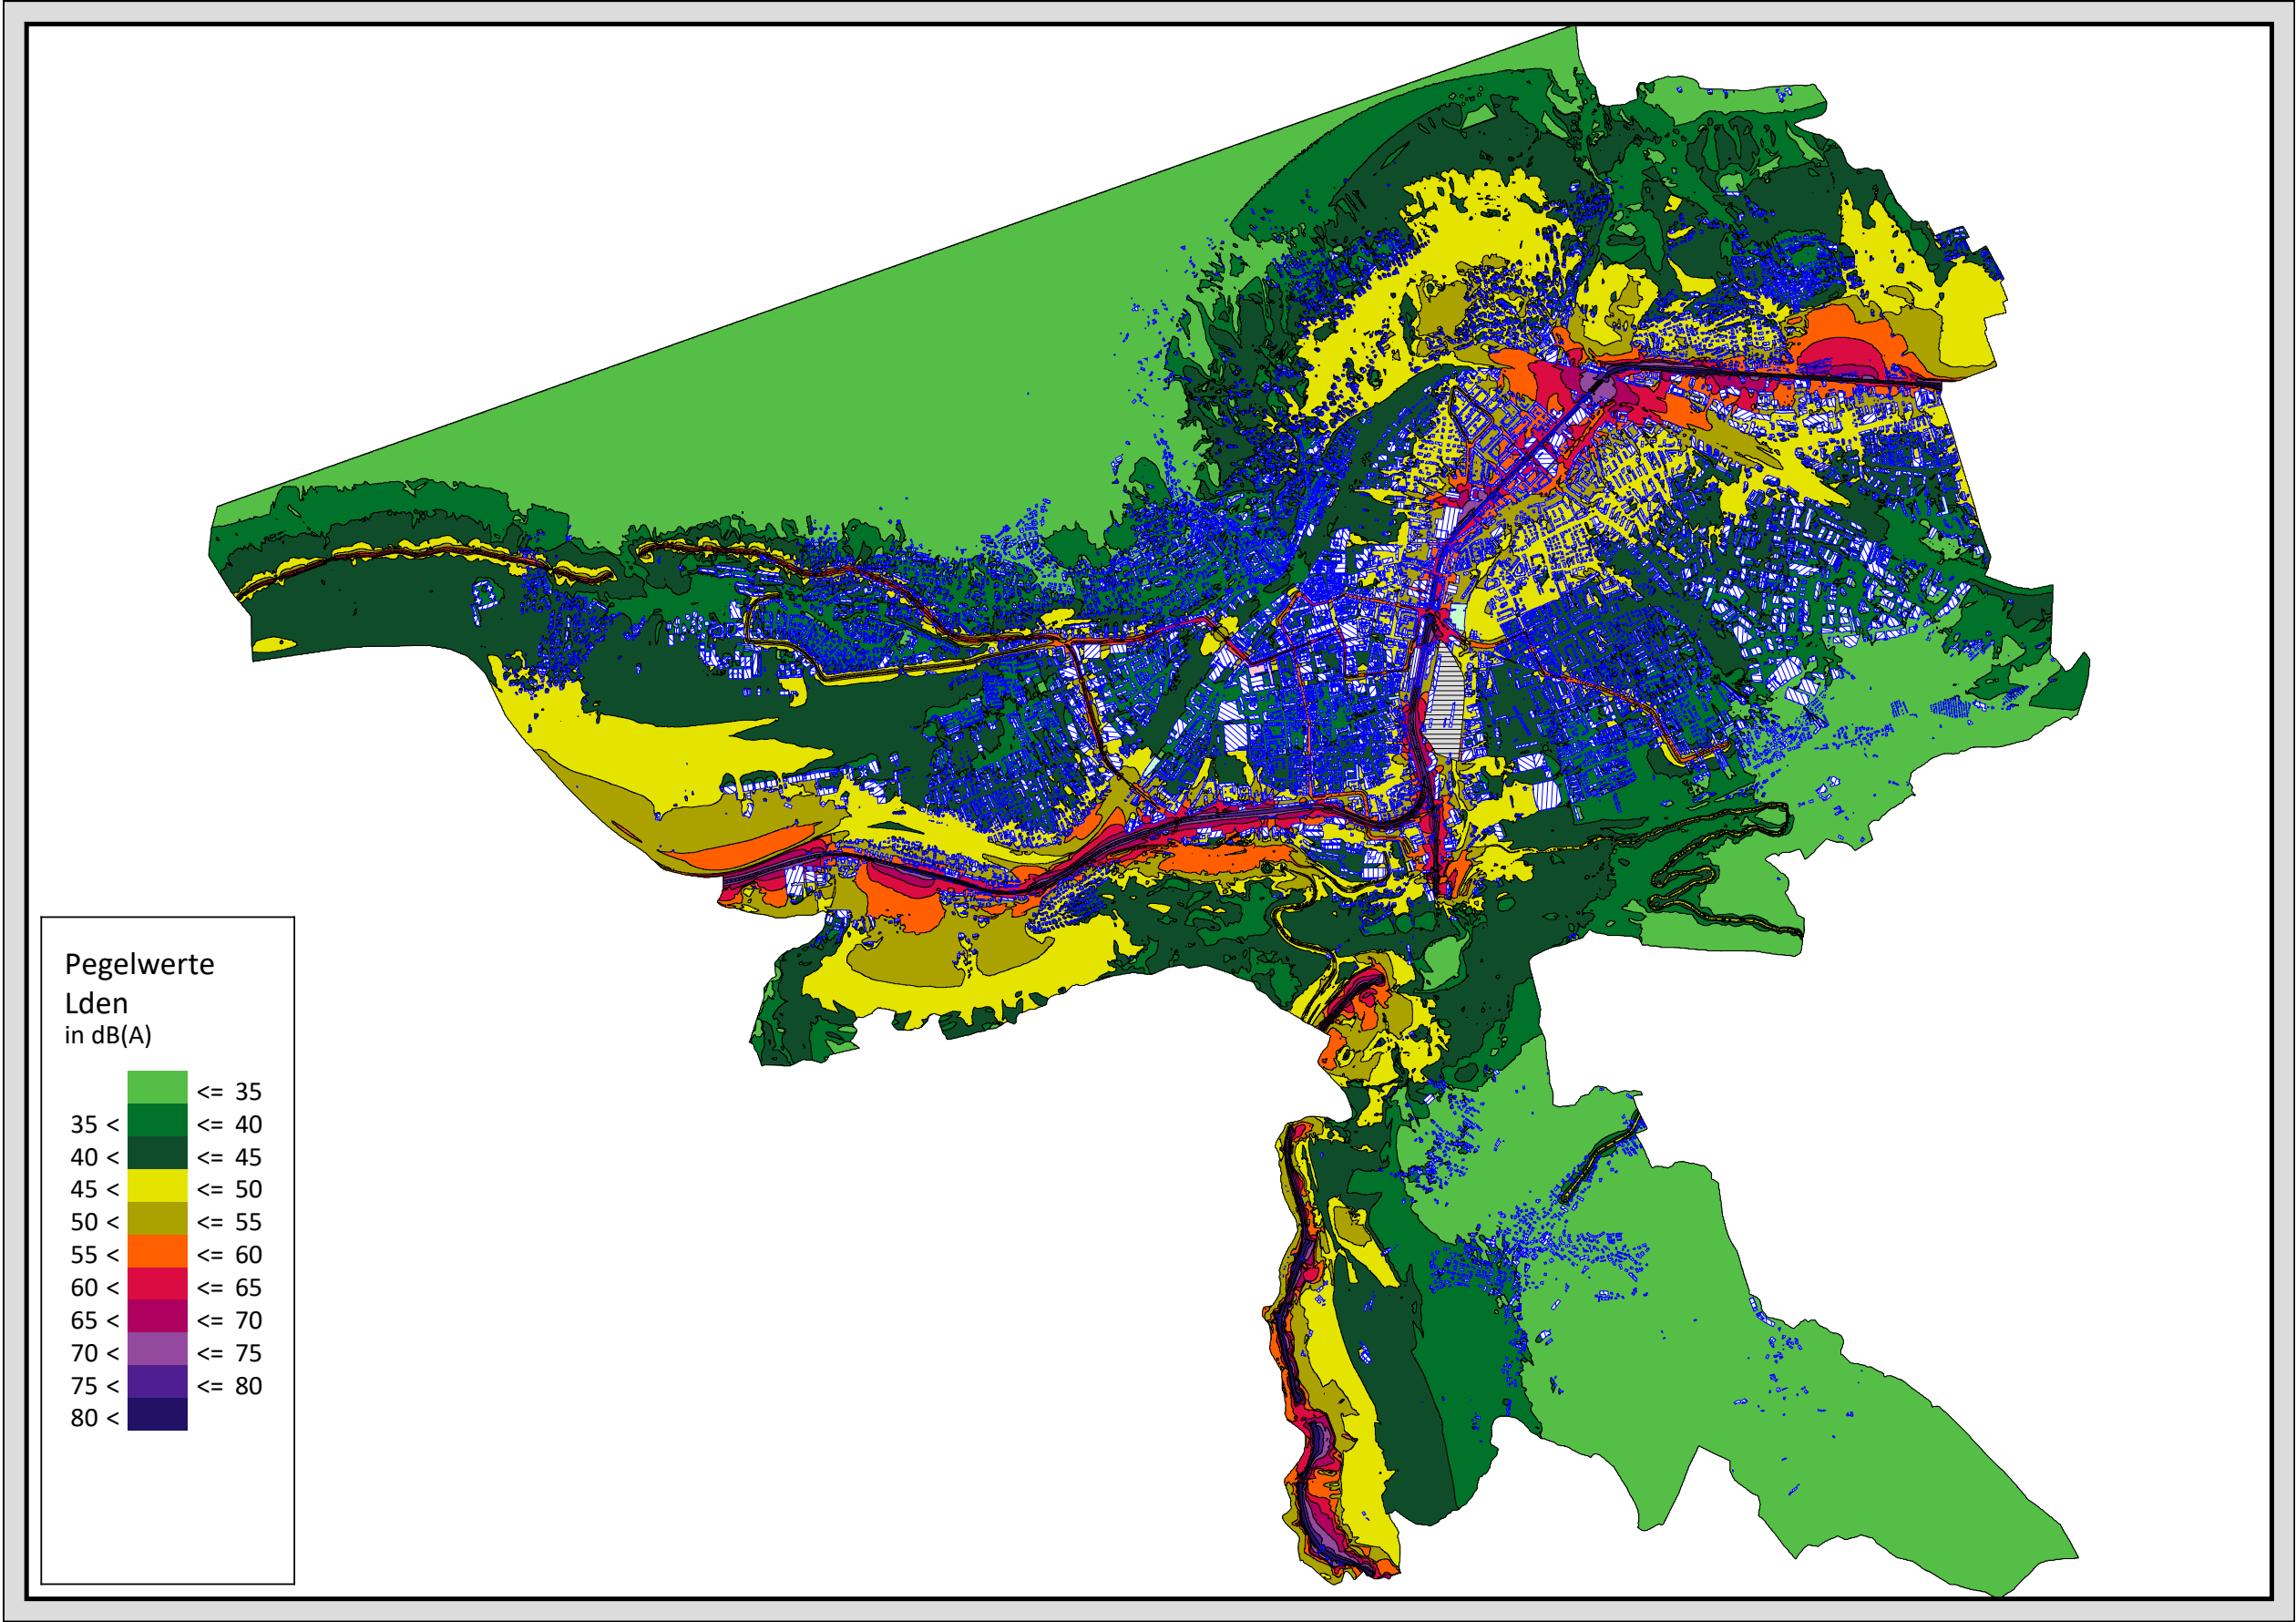



Abbildung 25: Rasterlärmkarte für den Schienenverkehr als  $L_{A,ES}$  in 4 m Höhe

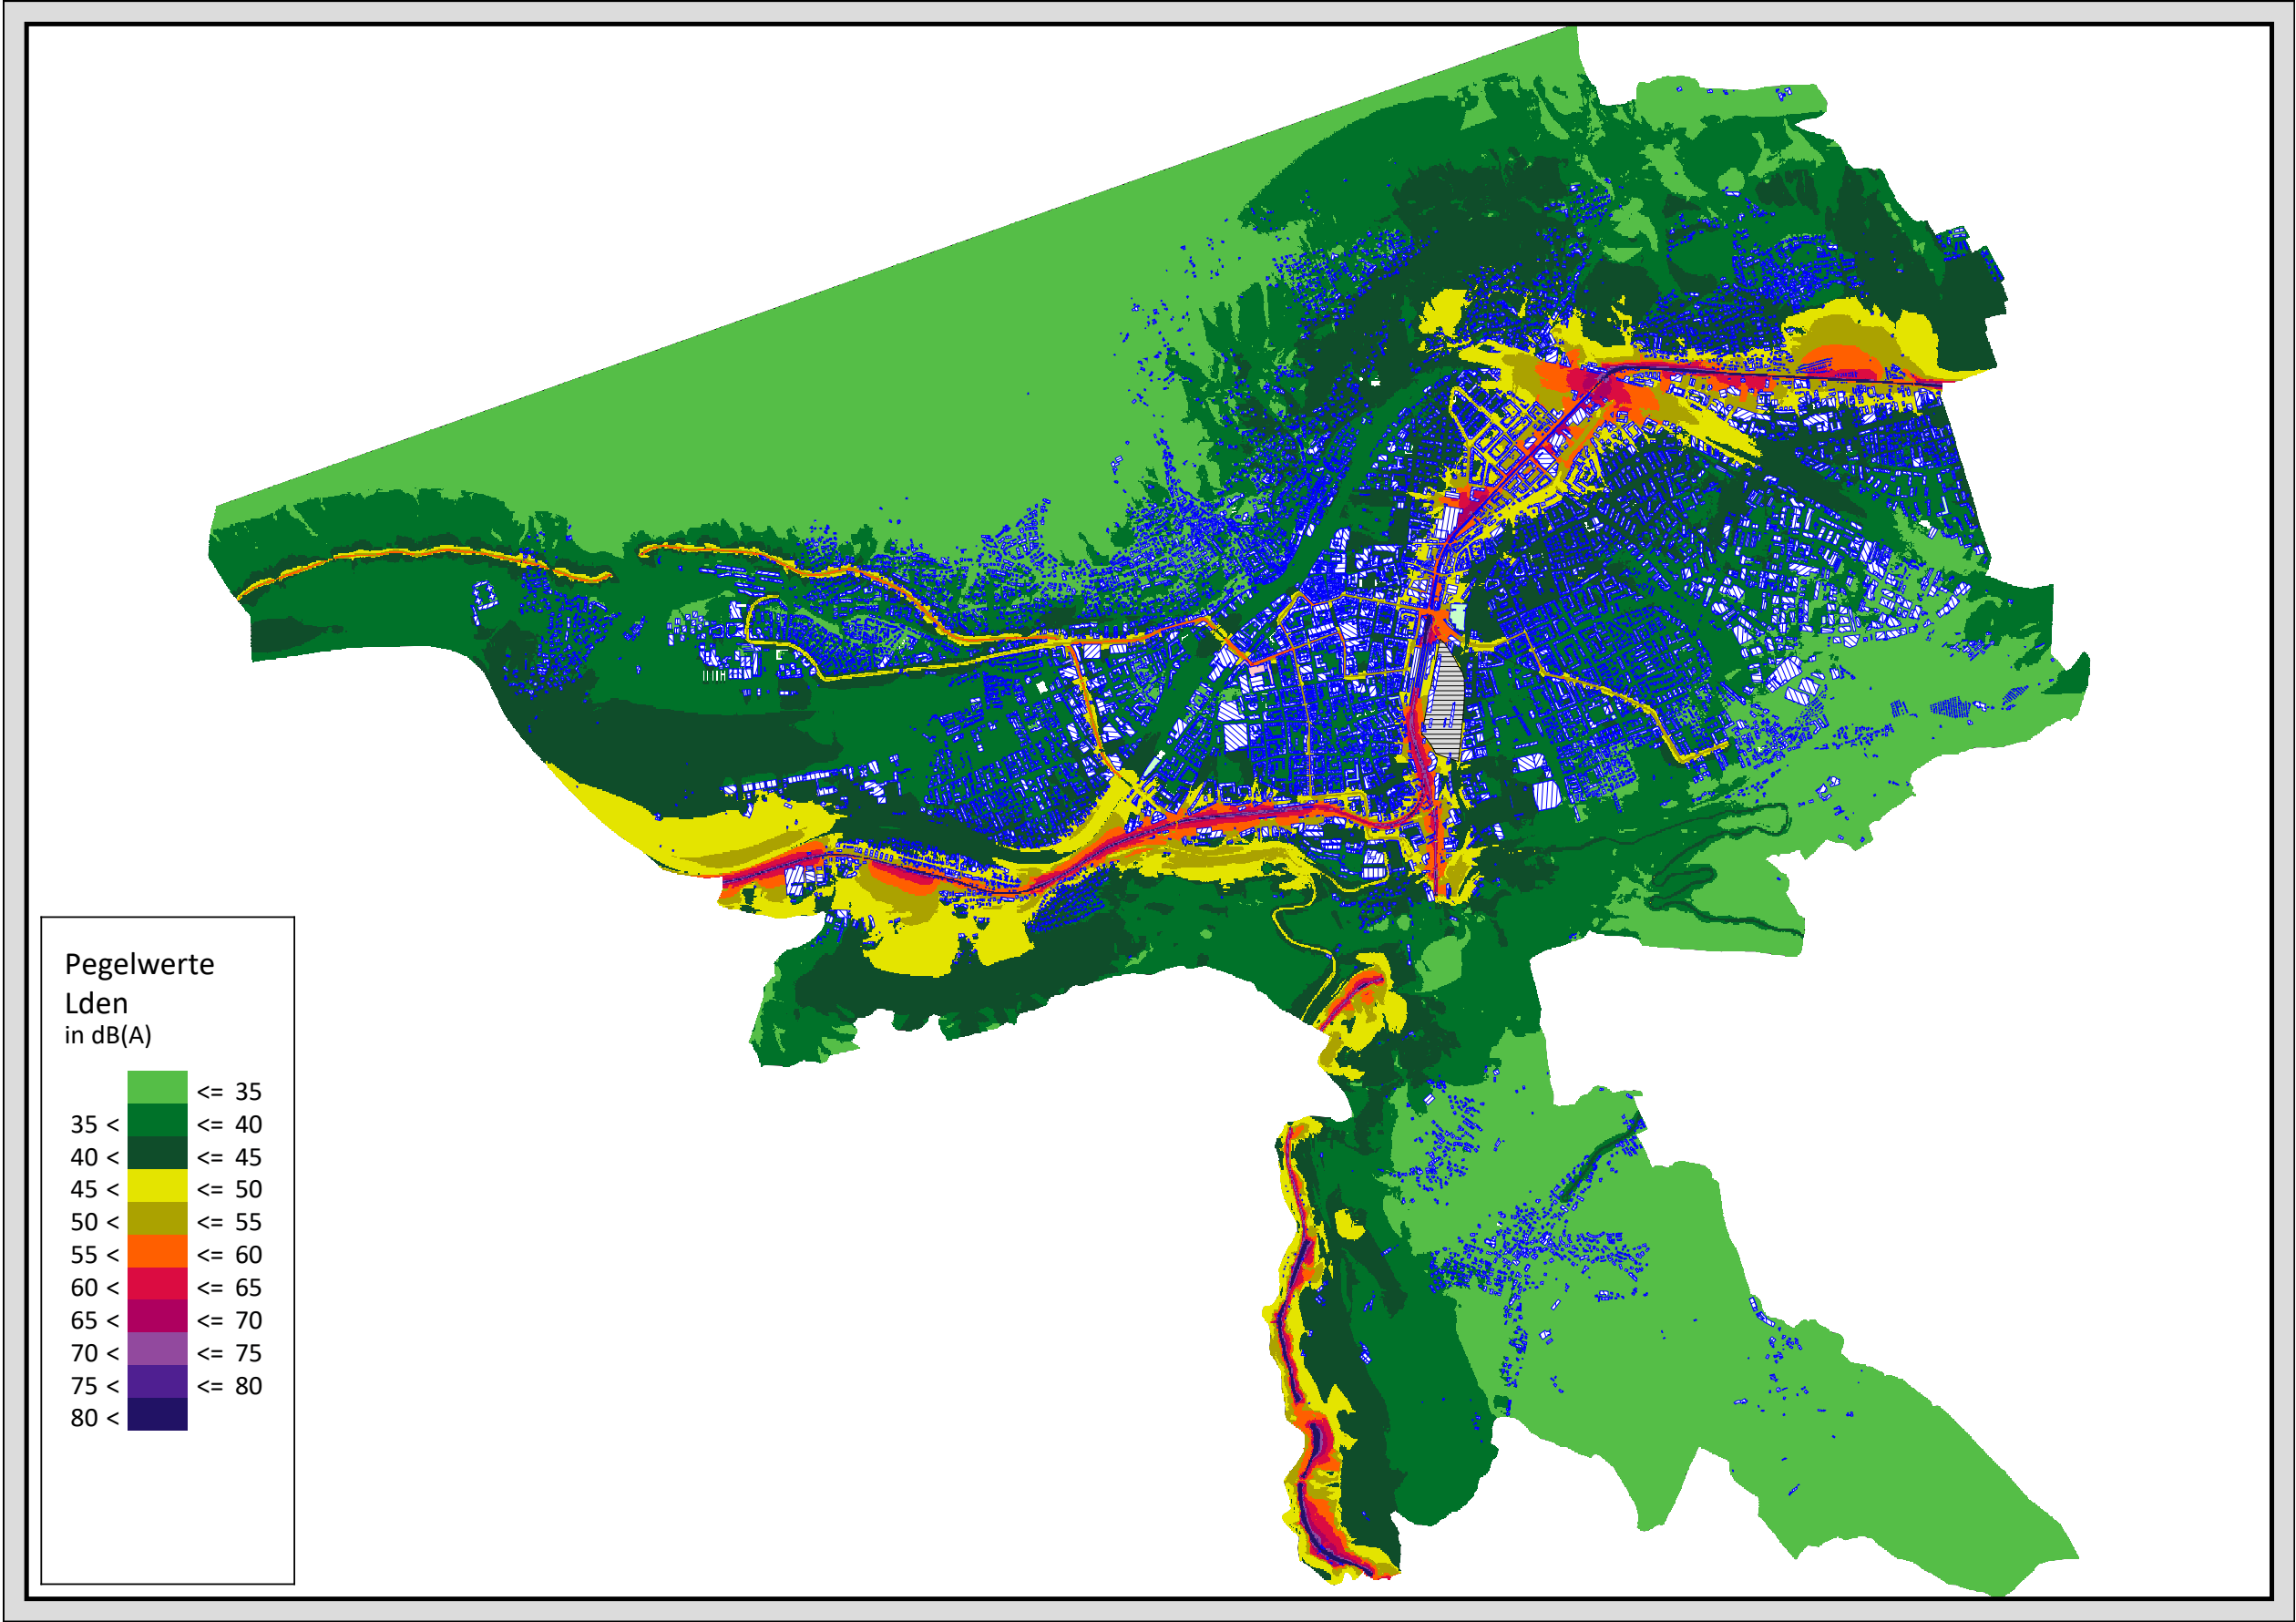

Bei Betrachtung dieser Rasterlärmkarten nach Quellen zeigt sich, dass die Belastungszonen beim Fluglärm deutlich ausgeweitet werden und als effektbezogener Substitutionspegel die Stadtteile Innsbruck, aber auch Reichenau und Pradl deutlicher betroffen werden. Im Gegensatz dazu werden die Belastungszonen ausgedrückt als effektbezogener Substitutionspegel beim Schienenverkehr deutlich kleiner, die Dominanz in einigen Bereichen geht daher deutlich zurück.

Aus den drei Einzelkarten für Straßen-, Flug- und Schienenverkehr wird durch Pegeladdition die Gesamtlärbelastung nach VDI 3722 Blatt 2 wie in nachstehender Abbildung wiedergegeben ermittelt:

Abbildung 26: Rasterlärmkarte für den Gesamtlärm als effektbezogener Substitutionspegel  $L_{A,ES}$  in 4 m Höhe

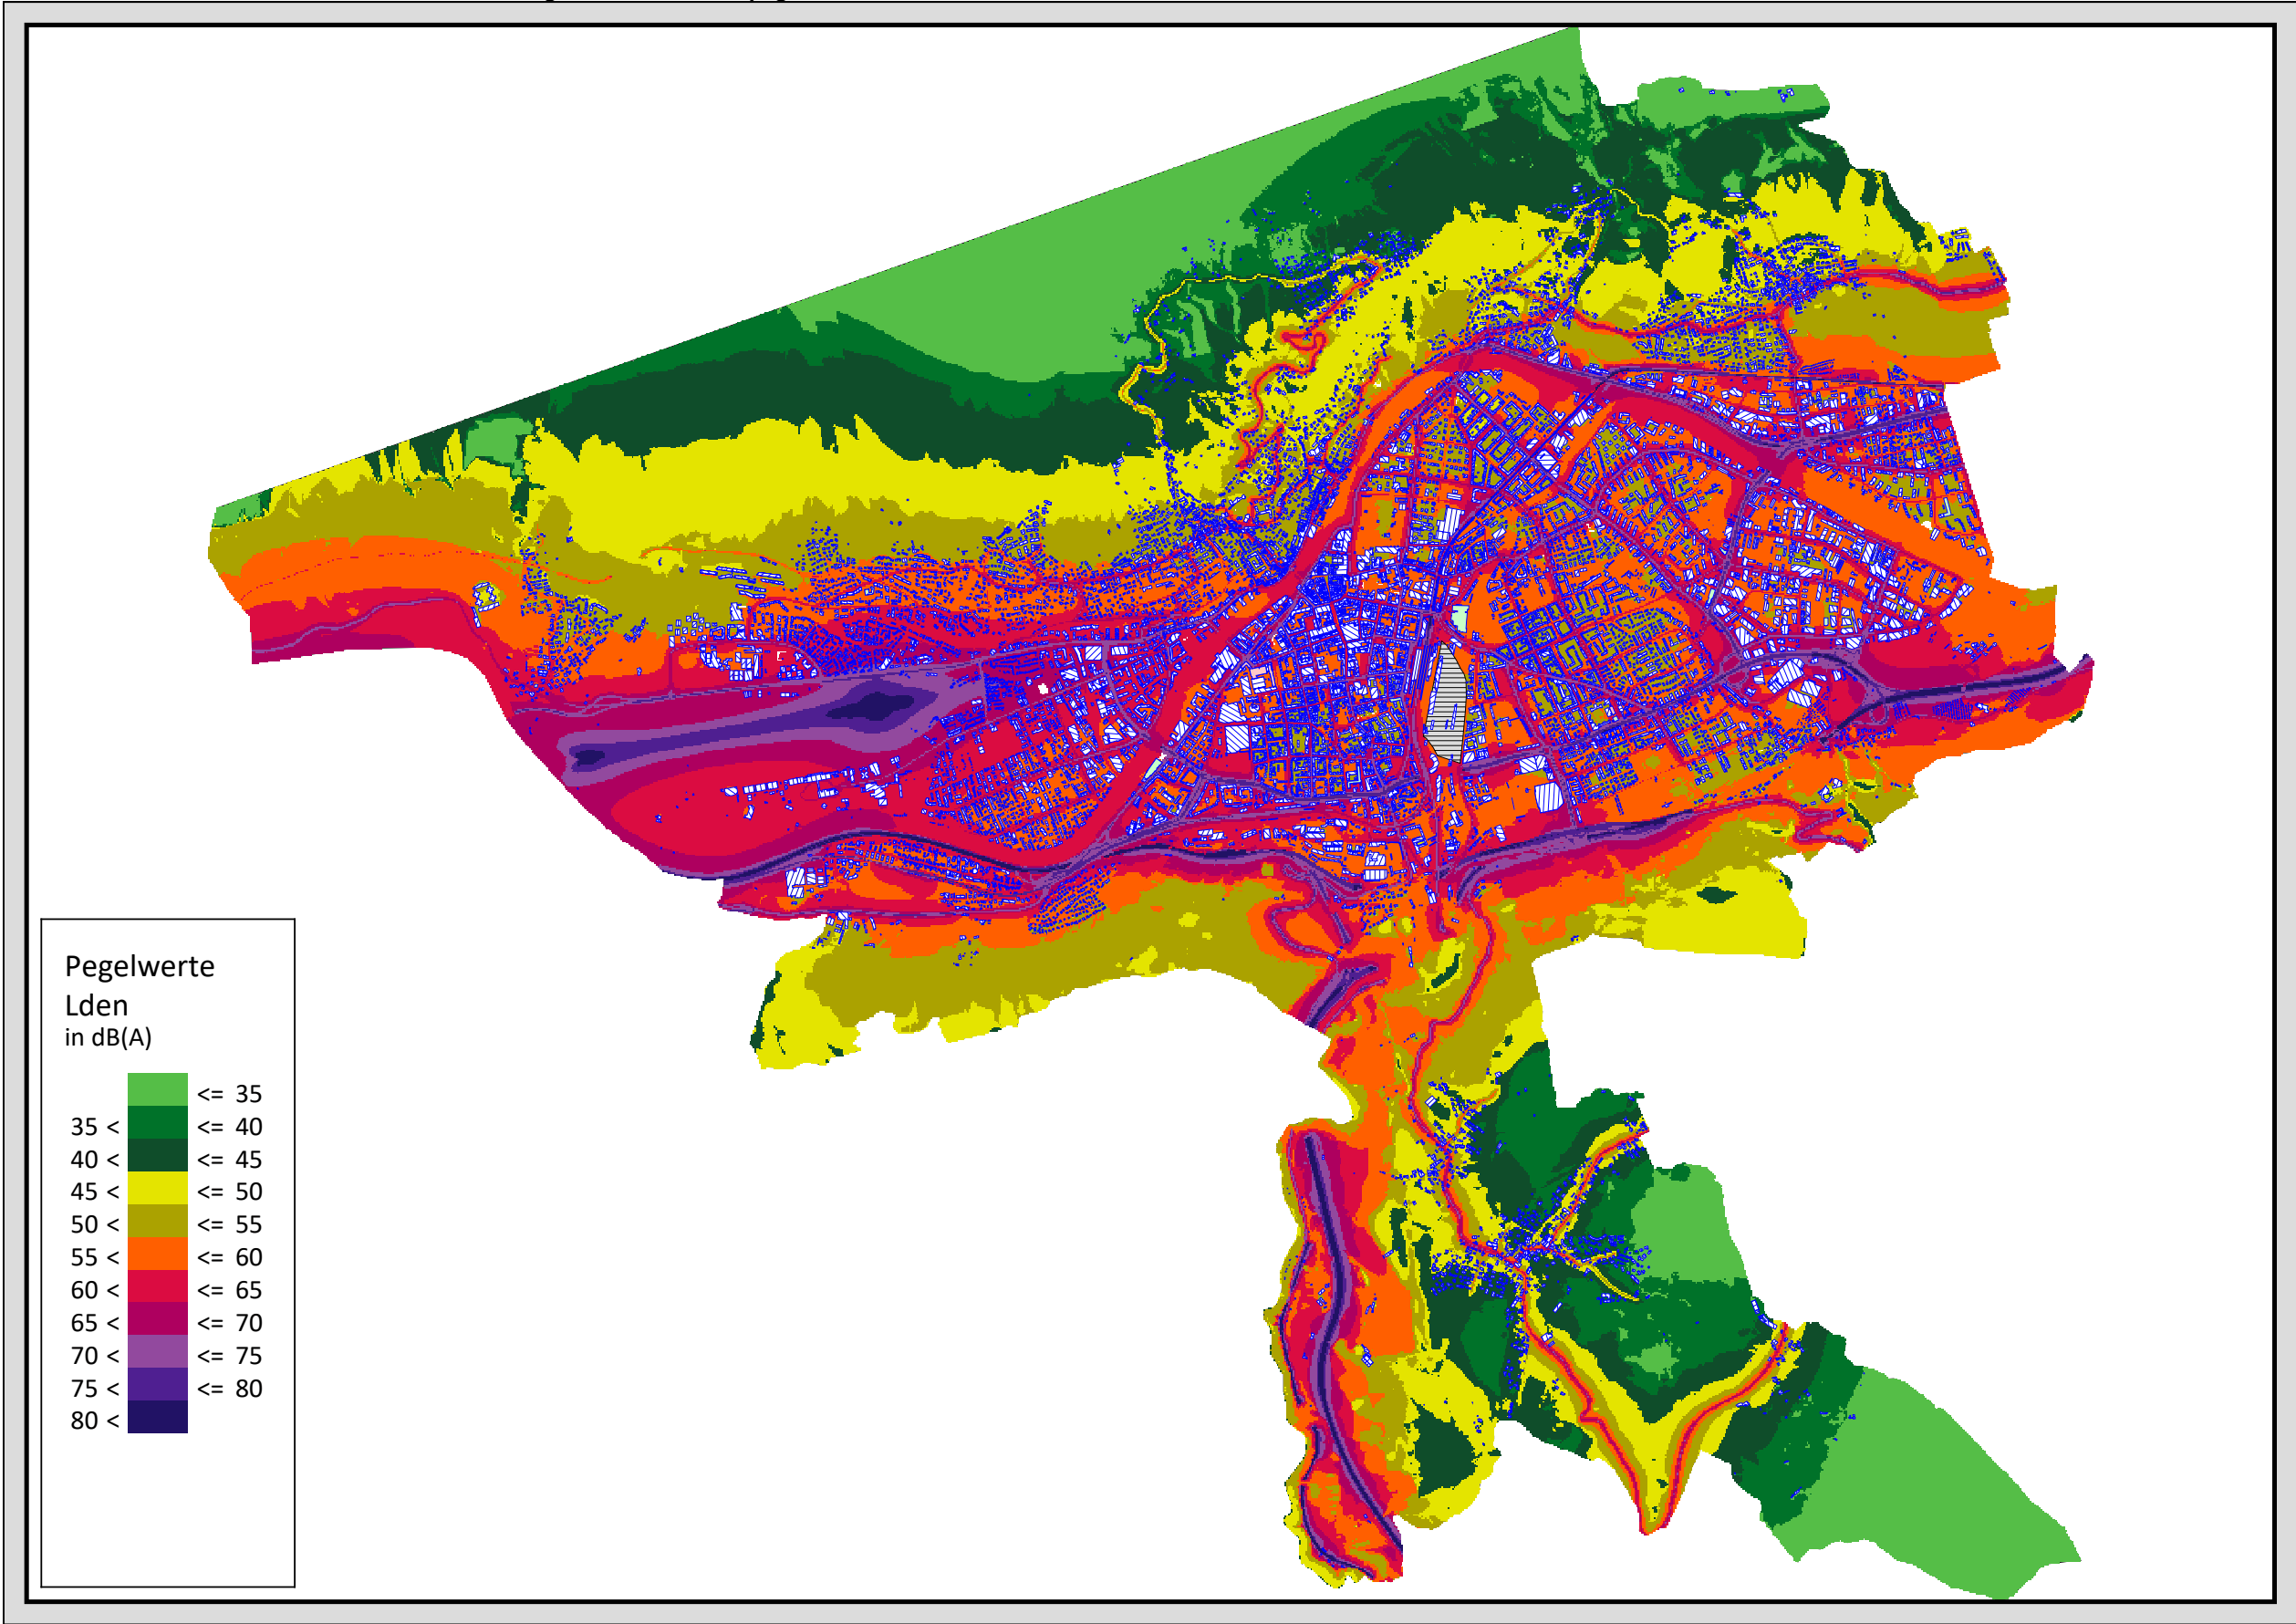

### 3. Hotspots

Hotspotanalysen dienen primär dazu, eine Priorisierungsmöglichkeit für Maßnahmen zu visualisieren. Dabei wird nicht ausschließlich die flächenhafte Lärmbelastung herangezogen, sondern auch die Betroffenheit in Form der Anzahl der jeweiligen Anwohnerinnen und Anwohner mit den Einwirkungen verknüpft. Im vorliegenden Fall bedeutet dies, dass für jede Quelle an jedem Gebäude die nach Exposition-Wirkung-Beziehungen ermittelte Wahrscheinlichkeit einer Belästigung berechnet wird. Diese Wahrscheinlichkeit wird aufsummiert und mit der Anzahl der Personen im Gebäude, welche dann gleichmäßig auf die Fassadenelemente verteilt werden, zu einer Beeinträchtigungskenngröße aggregiert. Im darauffolgenden Schritt werden über ein vorgegebenes Raster - hier aus Darstellungsgründen gewählt mit einer Seitenlänge von 200 m - diese Belästigungskenngrößen aufsummiert. Daraus ergeben sich Bereiche, in denen vergleichsweise viele Menschen vergleichsweise hohen Gesamtpiegeln ausgesetzt sind. Die Besonderheit der nachstehenden Abbildung liegt darin, dass diese Belastungen sich auf die Gesamteinwirkungen der unterschiedlichen Lärmquellen beziehen und so die Verteilungssituation deutlich wird:

**Abbildung 27: Hotspotanalyse in 200 m Rasterzellen auf Basis der Lärmkennziffer**

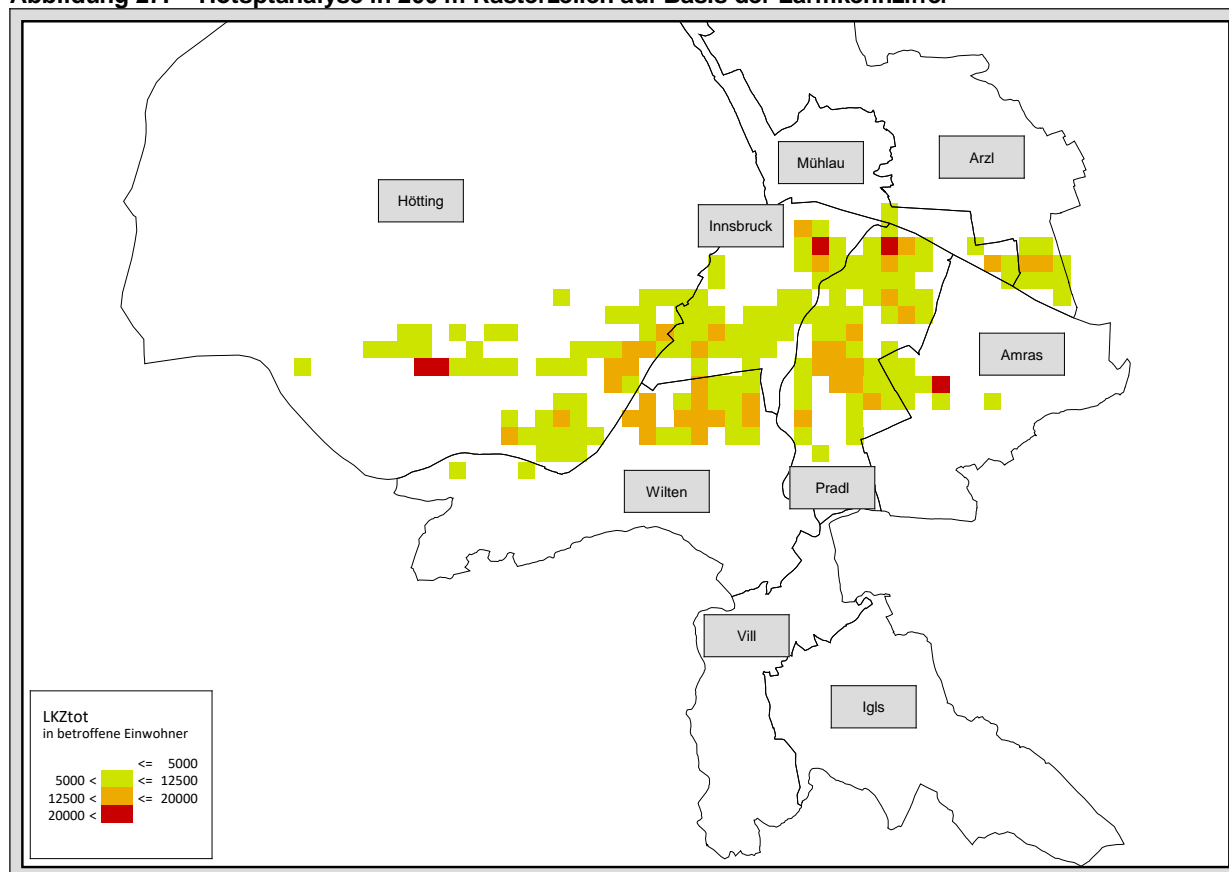

Die oben gezeigte Darstellung ist eine von vielen Möglichkeiten Hotspotanalysen durchzuführen. Je nach angestrebtem Zweck steht der Stadt Innsbruck ein Instrumentarium zur Verfügung, gröbere und feinere Analysen durchzuführen und die Gesamtlärmbelastung als zusätzliche Informationsquelle für Maßnahmenplanung zu nützen.

In der Darstellungsart in obiger Abbildung erscheinen 4 Hotspots mit einer Lärmkennziffer für die Summenlärmbelastung über 20.000. In der Katastralgemeinde Innsbruck scheint dabei der Bereich

um den Haydnplatz auf. Hier ist nicht die Lärmbelastung für sich besonders relevant, sondern die Dichte der Bewohnerinnen und Bewohner am Haydnplatz. Die hohe Anzahl der Betroffenen lässt diesen Bereich als Hotspot erscheinen.

In Pradl kommt bereits ein kumulierender Effekt durch Überlagerung von Schienen- und Straßenverkehrslärm, nämlich der Westbahn und der B 171, im Bereich der General-Eccher-Straße in Kombination mit der hohen Anzahl der Hauptwohnsitzgemeldeten zu tragen.

In Amras ist ebenfalls ein Hotspot zu beobachten dieser entsteht im Bereich der Dr.-Ferdinand-Kogler-Straße aufgrund der Belastungen durch den Erschließungsverkehr des Einkaufszentrums und der Autobahnzubringer wie auch durch die mehrseitigen Belastungen durch das Gemeindestraßennetz. Diese Hotspotanalyse zeigt sehr deutlich auf, welche Bedeutung der baulichen Gestaltung von Gebäuden in lärmbelasteten Bereich zukommt.

Der vierte Hotspot ist im Stadtteil Hötting zu verorten. Er ist in seinem Ausmaß doppelt so groß wie die drei vorhin genannten und entsteht entlang der Kranebitter Allee durch Kumulierung der verschiedenen Geräuschquellen, hier besonders der B 171 und der Schallimmissionen des Flugverkehrs. Die diesbezügliche Analyse zeigt auch, dass sich im Hinblick auf das Beschwerdeverhalten und den Auffälligkeitsgrad durch diese Analysemethode Erklärungsbeiträge liefern lassen.

## 4. Ruhige Gebiete

Ruhigen Gebieten kommt bereits aus dem Titel der Umgebungslärmrichtlinie eine besondere Bedeutung zu. Der Erhalt ruhiger Gebiete auch im Ballungsraum wird als Ziel dieser Richtlinie genannt. Nun ist es bei Vorliegen unterschiedlicher strategischer Lärmkarten aus verschiedenen Quellen so gut wie unmöglich, ruhige Gebiete im Überblick zu erkennen und damit die potenziell schützenswerten Bereiche ausfindig zu machen. Aber nicht nur die rechtlichen Rahmenbedingungen heben die Bedeutung ruhiger Gebiete hervor, auch die Ergebnisse der Interviewbefragungen sind hier eindeutig.

Für die nachstehende Abbildung wurde ein Schwellenwert für den  $L_{A,ES}$  von 55 dB gewählt. Im Sinne der Clusterauswahlkriterien bezeichnet dieser Wert für den  $L_{den}$  durch die einzelnen Verkehrsträger die Grenze zur hohen Belastung. Alle Werte darunter sind damit mittel oder gering belastet. Zum Finden dieser wenig belasteter Bereiche ist die Auswahl jedenfalls geeignet:



Abbildung 28: Ausweisung „ruhiger Gebiete“ mit einem effektbezogener Substitutionspegel  $L_{A,ES}$  in 4 m Höhe kleiner 55 dB

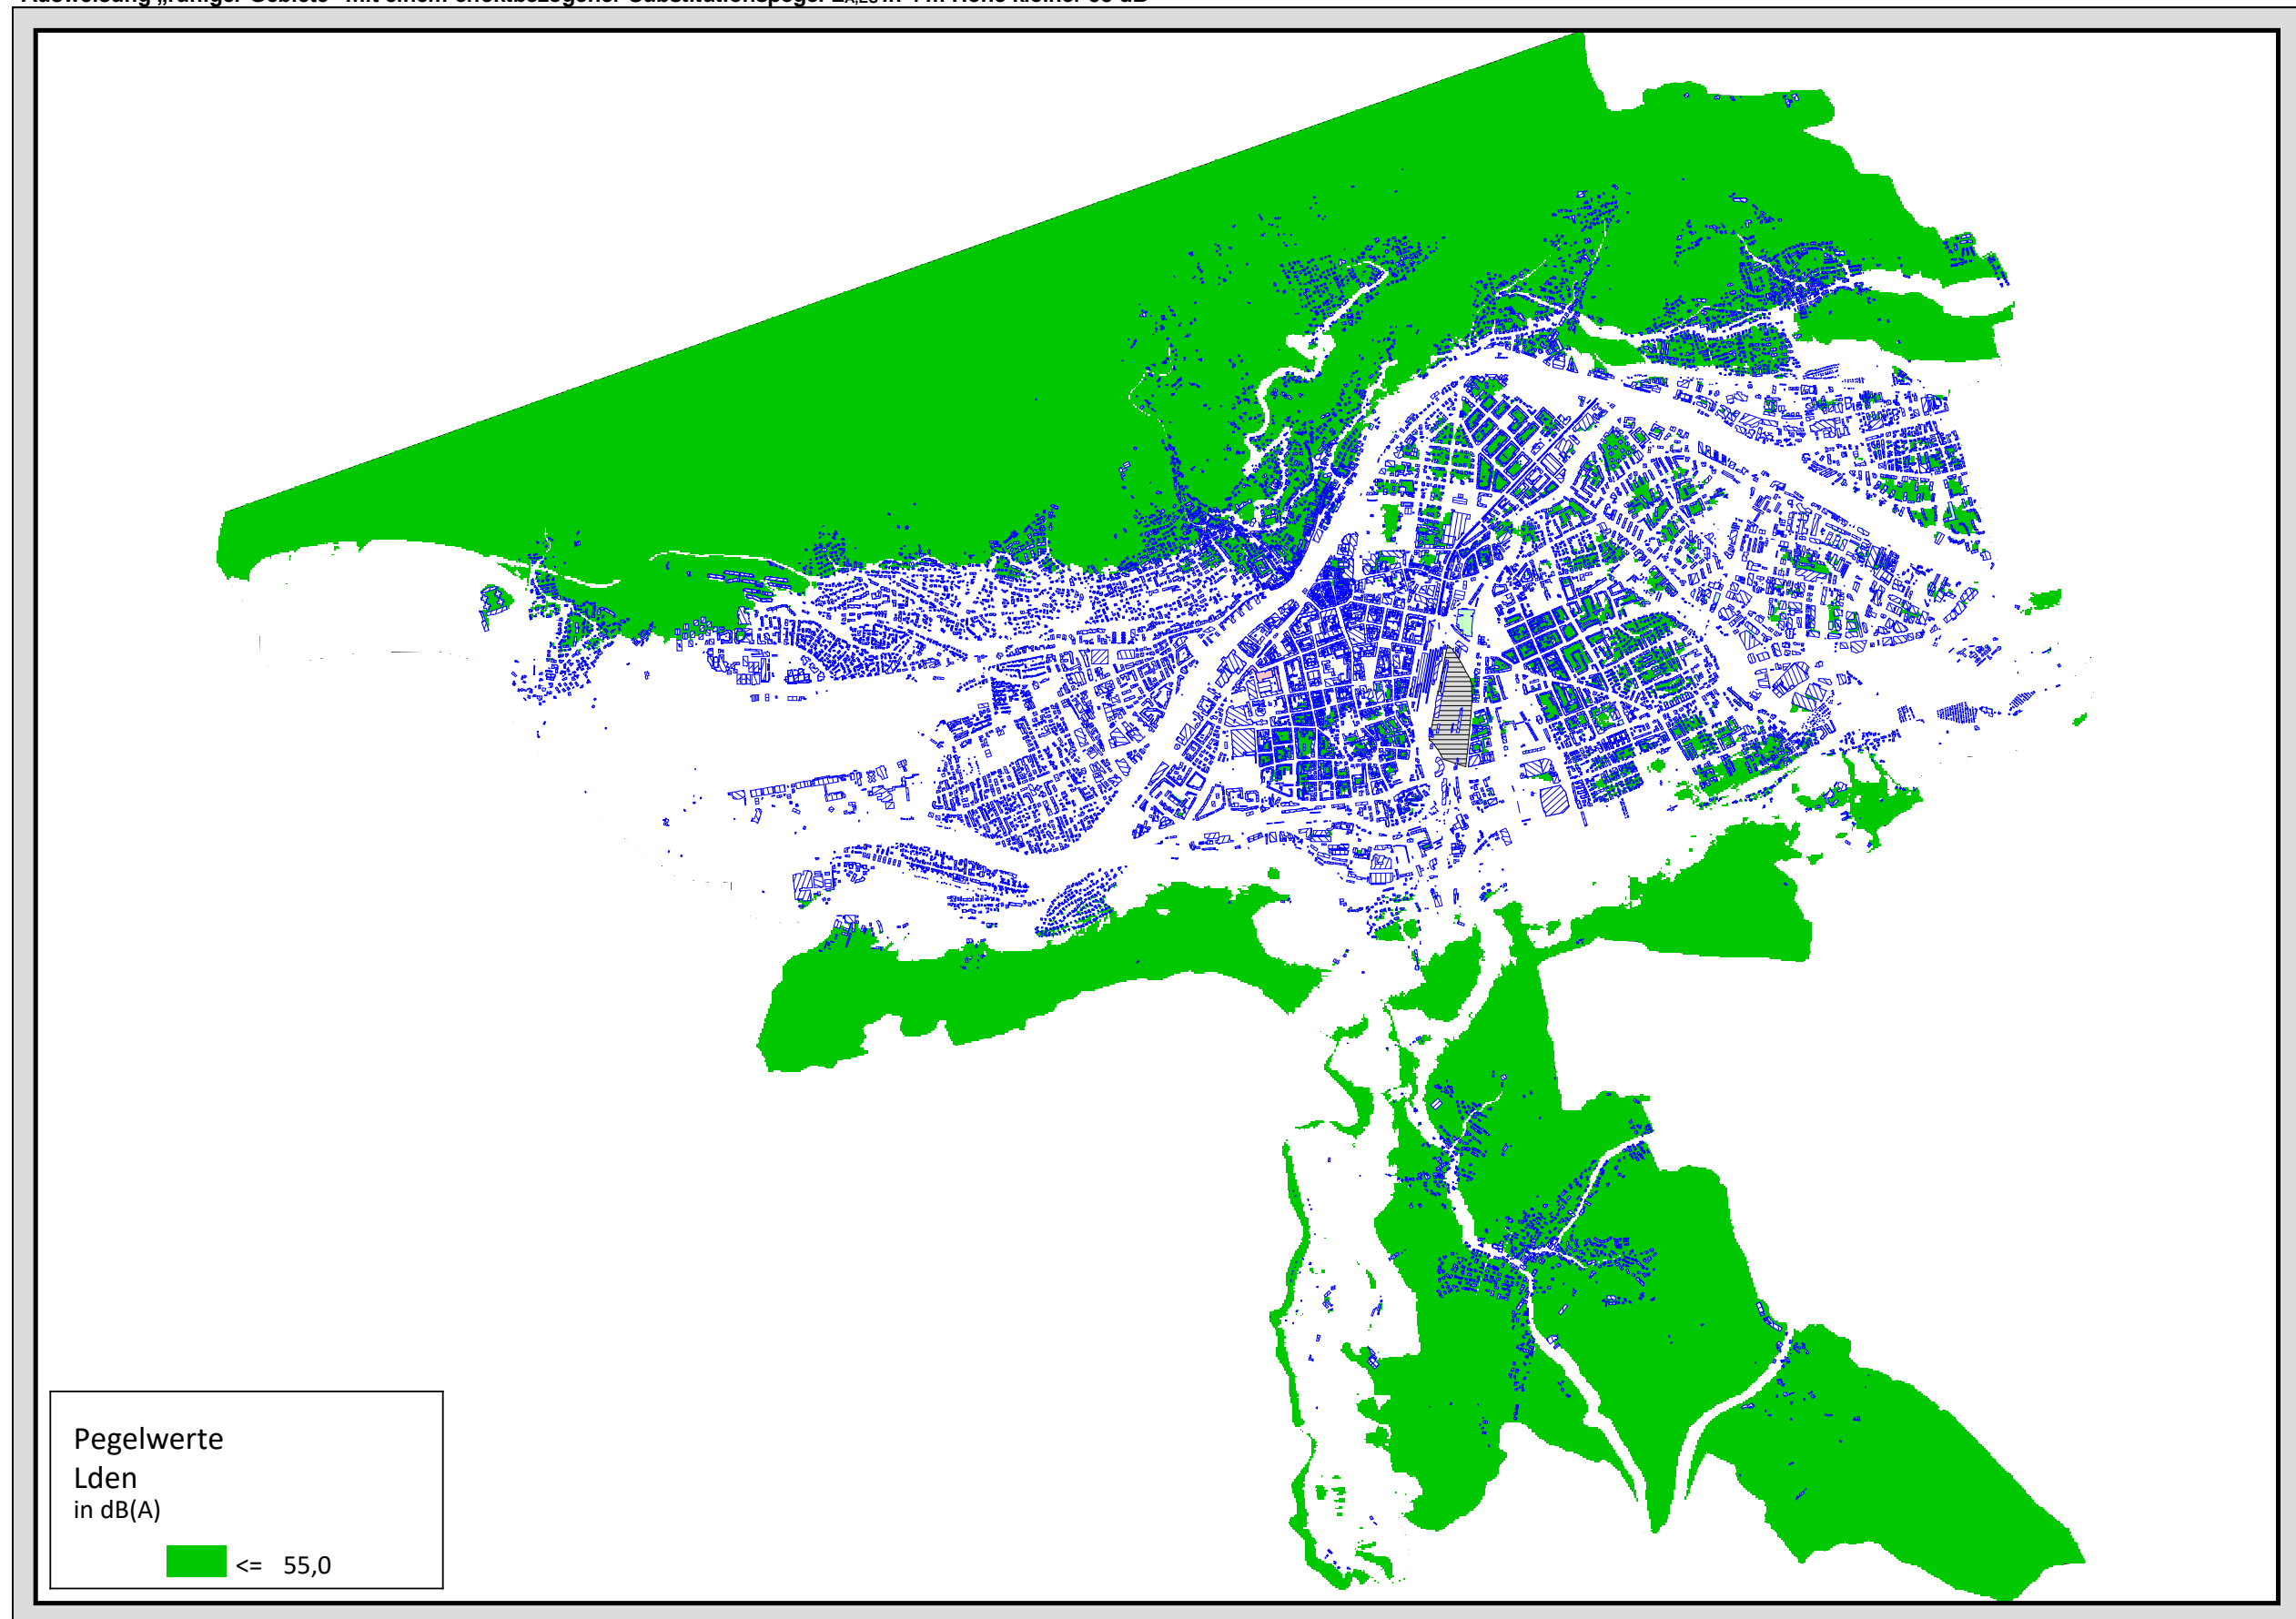



Die Summenlärmkarte für den effektbezogenen Substitutionspegel in der obenstehenden Abbildung zeigt im innerstädtischen Bereich nur wenige Gebiete, welche man als einigermaßen ruhig bezeichnen kann. Darunter fallen der Hofgarten und der Rapolidipark. Diesen zentralen innerstädtischen Naherholungszonen kommt eine hohe Bedeutung nicht nur als nutzbare Grünfläche sondern auch als allgemein zugängliche ruhige Zone im Sinne der Belastung von Verkehrslärm zu.

Viele weitere ruhige Bereiche sind kleinräumig zu finden. Dabei fällt die klassische Blockrandbebauung der Stadtteile Innsbruck (hier primär in Saggen) und Pradl auf. Diese beruhigten Lärmoasen haben für die Belästigungsreaktion eine hohe Bedeutung, stellen sie doch auch die Möglichkeit für Lüftungsmaßnahmen an ruhigen Fassaden her. In obiger Darstellung wird aber auch deutlich, dass im Westen Innsbrucks durch die Fluglärmwirkung keine lärmberuhigten Innenhofsituationen mehr bestehen.

Dem Erhalt dieser sehr kleinräumigen „ruhigen Gebiete“ wird aber eine besondere Bedeutung zukommen, dies umso mehr, als die gegenwärtigen Lösungen zur Gebäudekonditionierung in Form von Klimaanlage und Wärmepumpen das Potential aufweisen, diese ruhigen Zonen mit zumeist tieffrequenten oder tonalen Dauergeräuschen zu gefährden.

Aus diesen Überlegungen lassen sich in Kombination mit den Befragungsergebnissen folgenden Handlungsempfehlungen ableiten:

- Erhalt der innerstädtischen Parks nicht nur als Grün-, sondern auch als Verkehrsruhezonen.
- Erhalt der ruhigen Innenhofbereiche besonders in Randbebauungssituationen durch vorsorglichen Umgang in der Zulassung maschineller Anlagen im Freien wie Klimaanlage und Wärmepumpen.

Erfreulich aus dem Blickwinkel der Betrachtung ruhiger Gebiete sind die noch im Stadtgebiet Innsbruck vorhandenen, aber außerhalb der Kernbebauung liegenden vielen ruhigen Gebiete die unmittelbar und schnell erreichbar sind und die damit einen wesentlichen Beitrag für die temporäre Entlastung der Innsbruckerinnen und Innsbrucker leisten.

## DURCHFÜHRUNGSPARAMETER DER BEFRAGUNGEN

### Setting und Untersuchungsumfang der Befragungen

|                           |                                                                                                                                                                                                                                                       |
|---------------------------|-------------------------------------------------------------------------------------------------------------------------------------------------------------------------------------------------------------------------------------------------------|
| <b>N:</b>                 | 1000 Personen im Stadtgebiet von Innsbruck                                                                                                                                                                                                            |
| <b>Art:</b>               | Repräsentative Vorortbefragung durch geschulte Interviewerinnen und Interviewer                                                                                                                                                                       |
| <b>Fragebogen:</b>        | geschlossenen Fragen auf Basis eines standardisierten Fragebogens                                                                                                                                                                                     |
| <b>Stichprobe:</b>        | Geschichtetes Adress-Cluster-Sample auf Basis der Daten des Zentralen Melderegisters nach Lärmkorridoren (Belastungsgruppen) unter Einbeziehung der einzelnen Verkehrsträger, der demographischen Parameter und nach Katastralgemeinden (Stadtteilen) |
| <b>Lärmwertzuordnung:</b> | Verschneidung aller befragten Adresspunkte mit punktgenauen Fassadenlärmpegeln für den Tag- und den Nachtzeitraum aus dem entwickelten Gesamtlärmmodell (Bezugsjahr 2015) für sämtliche Verkehrsträger                                                |

#### Keine Imputations- / Complete Case-Verfahren

#### Durchgängige Berücksichtigung der gängigen Qualitäts- und Datenschutzstandards

Die Verschneidung der verschiedenen punktgenauen Fassadenpegel für den Tag- und den Nachtzeitraum mit den Ergebnissen der Befragungen lässt Querauswertungen und Rückschlüsse in alle gewünschten Richtungen zu. Durch eine breit gefächerte Schwerpunktsetzung in der Entwicklung des Fragebogens können zusätzliche Auswertungen jederzeit auch zu einem späteren Zeitpunkt nachgeholt werden. Spezielle Dosis-Wirkungs-Kurven, Sonderauswertungen für spezifische Belastungen, longitudinale oder qualitative Folgestudien, GIS-Modellierungen etc. werden ermöglicht.

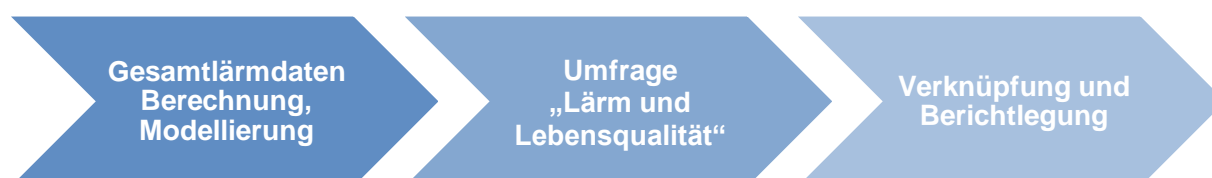

# Der Fragebogen

## 1. Zusammenstellung

Quantitative Datengrundlagen zur Lärmsensibilität, sowie den Belästigungsreaktionen der Bevölkerung Innsbrucks sind bis dato nur in Ansätzen verfügbar und nicht in ausreichendem Umfang vorhanden. Über den entwickelten, zum Teil auf validierten und erprobten Items und Skalen aufgebauten Fragebogen, der sich am aktuellen Stand des Wissens orientiert, können diese Daten hergestellt werden. Das Hauptaugenmerk wurde auf die Wahrnehmung von und Betroffenheit durch Verkehrslärm und die damit einhergehenden Belästigungsreaktionen der Innsbrucker Bevölkerung gelegt.

Die Fragen zur Ausgesetzttheit und Belästigung durch Verkehrslärm, sowie die entsprechenden Skalen (größtenteils 11-er Skalen) orientieren sich an den Empfehlungen der ICBEN (International Commission on Biological Effects of Noise), des EU-SILC 2015 und des Mikrozensus „Umweltbedingungen“. Berücksichtigt wurden weiters bereits validierte Items aus vergleichbaren Studien (NORAH, LEF-K Zimmer & Ellermeier zur Lärmempfindlichkeit, 5-Item-Skala zu Schlafproblemen, Vorerhebungen im Tiroler Raum etc.). Die soziodemographischen Fragen konnten zum Großteil standardisiert übernommen werden.

Zu einem erheblichen Teil wurde der Fragebogen jedoch eigens entwickelt und konnte daher nur eingeschränkt auf bestehenden Modulen aufsetzen.

Nach der Konsolidierung und Akkordierung des Fragebogens wurden sowohl statistische Reliabilitätstests, als auch eine Reihe von Testinterviews zur Validierung desselben durchgeführt.

## 2. Aufbau und Inhaltliche Schwerpunkte

- **Soziodemographie** (Alter, Geschlecht, Berufsstand, Bildungsniveau etc.)
- **Wohnsituation** (Wohnsitzfrage, Art des Hauses, Haushaltsgröße, Stockwerk, Lärmschutzfenster, Barrieren, Innenhöfe etc.)
- **Lärmwahrnehmung** (Ausgesetzttheit, Wahrnehmung, Wind- und Wettereinflüsse)
- **Lebensbedingungen und Lebensqualität** (Güte Wohnbedingungen, Verkehrsverbindungen, Sicherheit, Landschaft und Natur, Nachbarschaftsbeziehungen, Bedingungen für Kinder, Verbundenheit zur Stadt, Zufriedenheit mit der Wohnsituation)
- **Subjektive Einschätzung der eigenen Lebensqualität**
- **Subjektive Einschätzung der eigenen Lärmempfindlichkeit**
- **Subjektive Einschätzung der eigenen Gesundheit**
- **Belästigung / Störung durch Lärm**
- **Belästigung / Störung durch Lärm im Schlaf**
- **Lärmcoping** (geschlossene Fenster, veränderte Wohnraumnutzung, Ärger, Hilflosigkeit, Gespräche mit Nachbarn, Gespräche mit Behörden, Veränderung der Lärmbelastung in den letzten Jahren insgesamt etc.)
- **Mobilität** (Nutzung öffentl. Verkehrsmittel, Auto, Bahn, Flugzeuge, Rad, Fußwege, Zufriedenheit mit öffentl. Verkehrsmitteln, Pendlerfrage)

- **Umgang mit Lärm** (eigener Beitrag zum Gesamtlärm, Bekanntheit der Umgebungslärmkarten, Fremdeinschätzung Lärmstörung, Sinnhaftigkeit weiterer Maßnahmen zur Lärmreduktion, Unterschiede zu anderen österr. Städten etc.)

Alle befragten Personen unterschrieben eine Einverständniserklärung zur Teilnahme und Datenverarbeitung.

# Die Stichprobe

Um die Gesamtanzahl der 1000 angestrebten Interviews zu erreichen, wurde ein Sampling ausgearbeitet, das sich an 3 Grundparametern gleichermaßen orientierte:

- Demographische Repräsentativität
- Repräsentative Abbildung der 9 Katastralgemeinden von Innsbruck
- Einteilung nach vorgegebenen Lärmkorridoren analog den Lärmbelastungen ausgehend von den Hauptverkehrsträgern Straße, Schiene und Flugverkehr

## 1. Demographische Repräsentativität

Die Parameter Alter und Geschlecht, sowie das Verhältnis der Anzahl der Gesamtbevölkerung zur Größe der Stichprobe (N) bilden die klassischen Repräsentativitätskriterien für größere Umfragen und kamen auch bei den Befragungen zur Gesamtlärbetrachtung Innsbruck zum Einsatz, wobei sehr strenge Kriterien in Hinblick auf tolerable Abweichungen (Standardfehler) vorgegeben wurden.

### 1.1. Alter

Die Altersvorgaben, kategorisiert in 3 Altersgruppen, wurden im Zuge der Befragungen sehr genau abgebildet und weichen in ihrer größten Ausprägung um weniger als 1% von der Realverteilung in der Innsbrucker Gesamtbevölkerung ab:

**Tabelle 18: Soll-Ist-Vergleich der Altersgruppen Stichprobe ↔ Interviews**

|                 | Vorgegebene Stichprobe in Prozent<br>(entspricht der Realverteilung) | Häufigkeit geführte<br>Interviews | Gültige Prozente<br>Interviews | Abweichung in<br>Prozent |
|-----------------|----------------------------------------------------------------------|-----------------------------------|--------------------------------|--------------------------|
| 18 bis 40 Jahre | 41,8                                                                 | 440                               | 42,7                           | <b>0,9</b>               |
| 41 bis 60 Jahre | 31                                                                   | 316                               | 30,6                           | <b>-0,4</b>              |
| über 60 Jahre   | 27,2                                                                 | 275                               | 26,7                           | <b>-0,5</b>              |
| Gesamt          | 100,0                                                                | 1031                              | 100,0                          | <b>0,0</b>               |

### 1.2. Geschlechterverteilung

Aus dem Soll-Ist-Vergleich Stichprobe ↔ durchgeführte Interviews ergibt sich für die Geschlechterverteilung eine Abweichung von knapp 1,2% zugunsten der weiblichen Befragten:

**Tabelle 19: Soll-Ist-Vergleich der Geschlechterverteilung Stichprobe ↔ Interviews**

|          | Vorgegebene Stichprobe in Prozent<br>(entspricht der Realverteilung) | Häufigkeit geführte<br>Interviews | Gültige Prozente<br>Interviews | Abweichung in<br>Prozent |
|----------|----------------------------------------------------------------------|-----------------------------------|--------------------------------|--------------------------|
| weiblich | 51,3                                                                 | 541                               | 52,5                           | <b>1,2</b>               |
| männlich | 48,7                                                                 | 490                               | 47,5                           | <b>-1,2</b>              |
| Gesamt   | 100,0                                                                | 1031                              | 100,0                          | <b>0,0</b>               |

Diese Abweichung resultiert aus der Gesamtzahl von 1031 vollständig durchgeführten Befragungen. In der Datenbank wurde eine eigene Variable gebildet, welche insgesamt 17 Fragebögen unberücksichtigt lässt und damit unter Einhaltung sämtlicher anderen Stichprobenkriterien den Standardfehler im Geschlechterverhältnis auf unter 0,4% drückt. Auch bezogen auf die Geschlechterverteilung konnte somit eine sehr genaue Abbildung der Gesamtbevölkerung im Zuge der Befragungsdurchführung erreicht werden.

### 1.3. Stichprobengröße

Die Gesamtanzahl von 1031 vollständig durchgeführten Interviews (N) entspricht einem Anteil von knapp einem Prozent der Hauptwohnsitzbevölkerung Innsbrucks im befragbaren Alter von über 18 Jahren. Im Zentralen Melderegister waren zum Stichtag 01.01.2016 für Innsbruck 69.888 Wohnungen gemeldet. Da unter Berücksichtigung der anderen Stichprobenkriterien nur ein Interview pro Haushalt als sinnvoll vorgegeben wurde, konnte damit jeder 68. Haushalt erfolgreich befragt werden.

Da als weitere Vorgabe nur jene Personen befragt werden durften, die seit mindestens einem vollen Jahr in ihrer Wohnung lebten und daher die Lärmsituation in ihrem Wohnumfeld ausreichend beurteilen konnten, stellten die Wanderungsbewegungen eine erhebliche Herausforderung für die Durchführung der Befragungen dar. 2016 wurden in Innsbruck-Stadt 12.152 Zuzüge, 10.943 Wegzüge und 12.105 Umzüge verzeichnet,<sup>4</sup> was einem Wanderungsvolumen von fast einem Viertel der Hauptwohnsitzbevölkerung entspricht. Wird dieses Viertel bei einer durchschnittlichen Haushaltsgröße von 1,92 Personen pro Haushalt (letztstehender Stand 2014) auf die Gesamtzahl der befragbaren Haushalte übertragen, ist davon auszugehen, dass **jeder 46.** – aufgrund der Vorgaben überhaupt mögliche – **Haushalt in Innsbruck erfolgreich befragt** wurde.

Insgesamt kann somit festgehalten werden, dass eine aus demographischer Sicht hochrepräsentative Befragung durchgeführt wurde (siehe dazu auch die Ausführungen im Kapitel *Rücklaufquote*).

## 2. Repräsentative Abbildung der 9 Katastralgemeinden

Die durchzuführenden Befragungen sollten sämtliche 9 Katastralgemeinden umfassen und somit verteilt auf das gesamte Stadtgebiet von Innsbruck stattfinden.

**Tabelle 20: Schlüssel Katastralgemeinden Innsbruck (nach Einwohneranzahl geordnet)**

| Katastralgemeinde | Einwohner      | % anteilig     | absolut     | Anpassungsfaktor | zu befragen |
|-------------------|----------------|----------------|-------------|------------------|-------------|
| Hötting           | 34.416         | 26,13%         | 261         | 75%              | 196         |
| Pradl             | 32.842         | 24,94%         | 249         | 75%              | 187         |
| Innsbruck         | 21.464         | 16,30%         | 163         | 125%             | 204         |
| Wilten            | 17.853         | 13,56%         | 136         | 110%             | 149         |
| Arzl              | 10.829         | 8,22%          | 82          | 100%             | 82          |
| Amras             | 5.933          | 4,50%          | 45          | 150%             | 68          |
| Mühlau            | 5.403          | 4,10%          | 41          | 150%             | 62          |
| Igls              | 2.416          | 1,83%          | 18          | 175%             | 32          |
| Vill              | 546            | 0,41%          | 4           | 500%             | 21          |
| <b>Gesamt</b>     | <b>131.702</b> | <b>100,00%</b> | <b>1000</b> |                  | <b>1000</b> |

<sup>4</sup> Quelle: Stadtmagistrat Innsbruck: Statistische Quartalsblätter Heft 1, 2017

Um eine gleichmäßigere und repräsentativere Verteilung zu gewährleisten, wurden einwohnerschwächere Katastralgemeinden, sowie das Stadtzentrum (Katastralgemeinde Innsbruck) „aufgewertet“ und die beiden einwohnerstärksten Katastralgemeinden Hötting und Pradl „abgewertet“.

Als Mindestanzahl für die Befragungen wurden 20 Interviews pro Katastralgemeinde festgelegt:

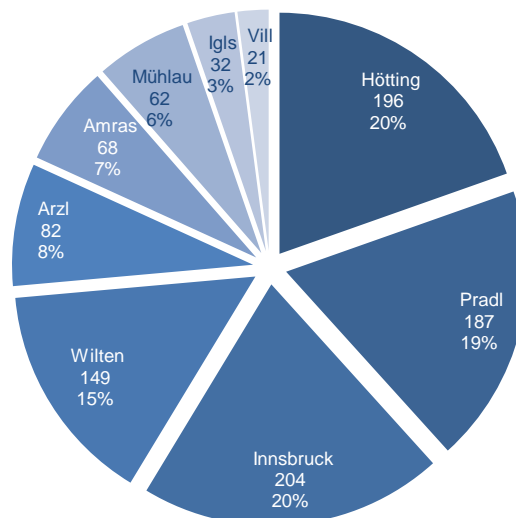

**Abbildung 29: Angepasster Befragungsschlüssel Katastralgemeinden Innsbruck**

Die untenstehende Tabelle umfasst die Gesamtanzahl der durchgeführten 1031 Interviews:

**Tabelle 21: Soll-Ist-Vergleich der Katastralgemeinden Stichprobe ↔ Interviews**

| Katastralgemeinde<br>(alphabetisch) | Häufigkeit vorgegebene<br>gewichtete Stichprobe | % anteilig<br>gewichtete<br>Stichprobe | Häufigkeit geführte<br>Interviews | % anteilig<br>geführte Inter-<br>views | % anteilige<br>Abweichung |
|-------------------------------------|-------------------------------------------------|----------------------------------------|-----------------------------------|----------------------------------------|---------------------------|
| Amras                               | 68                                              | 6,8                                    | 60                                | 5,8                                    | -1,0                      |
| Arzl                                | 82                                              | 8,2                                    | 102                               | 9,9                                    | 1,7                       |
| Hötting                             | 196                                             | 19,6                                   | 243                               | 23,6                                   | 4,0                       |
| Igls                                | 32                                              | 3,2                                    | 35                                | 3,4                                    | 0,2                       |
| Innsbruck                           | 204                                             | 20,4                                   | 176                               | 17,1                                   | -3,3                      |
| Mühlau                              | 62                                              | 6,2                                    | 50                                | 4,8                                    | -1,4                      |
| Pradl                               | 187                                             | 18,7                                   | 188                               | 18,2                                   | -0,5                      |
| Vill                                | 21                                              | 2,1                                    | 21                                | 2                                      | -0,1                      |
| Wilten                              | 149                                             | 14,9                                   | 156                               | 15,1                                   | 0,2                       |
| Gesamt                              | 1001                                            | 100                                    | 1031                              | 100                                    | 0,09                      |

### 3. Lärmkorridore

Zur Einteilung der Befragungen nach den Lärmbelastungen ausgehend von den Hauptverkehrsträgern Straße, Schiene und Flugverkehr wurden zunächst sämtliche Lärmdaten berechnet und fassadengenau modelliert (siehe dazu das Kapitel *Verwendete Lärmdaten*).

Anschließend wurden insgesamt 9 gewichtete Lärmkorridore erstellt:

**Tabelle 22: Matrix Lärmkorridore**

|                                    |                                 | Fluglärm Lden                 |                                 |                                | Schienenlärm Lden             |                                 |                                | Straßenlärm Lden              |                                 |                                |
|------------------------------------|---------------------------------|-------------------------------|---------------------------------|--------------------------------|-------------------------------|---------------------------------|--------------------------------|-------------------------------|---------------------------------|--------------------------------|
|                                    |                                 | Starkbe-<br>lastete ><br>55dB | Mittelbe-<br>lastete<br>45-55dB | Geringbe-<br>lastete <<br>45dB | Starkbe-<br>lastete ><br>55dB | Mittelbe-<br>lastete<br>45-55dB | Geringbe-<br>lastete <<br>45dB | Starkbe-<br>lastete ><br>55dB | Mittelbe-<br>lastete<br>45-55dB | Geringbe-<br>lastete <<br>45dB |
|                                    |                                 | Adress-<br>punkte             | Adress-<br>punkte               | Adress-<br>punkte              | Adress-<br>punkte             | Adress-<br>punkte               | Adress-<br>punkte              | Adress-<br>punkte             | Adress-<br>punkte               | Adress-<br>punkte              |
| <b>Fluglärm<br/>Lden</b>           | Starkbe-<br>lastete ><br>55dB   | 643                           | 0                               | 0                              | 19                            | 90                              | 534                            | 281                           | 362                             | 0                              |
|                                    | Mittelbe-<br>lastete<br>45-55dB | 0                             | 4012                            | 0                              | 367                           | 1213                            | 2432                           | 2139                          | 1768                            | 105                            |
|                                    | Geringbe-<br>lastete <<br>45dB  | 0                             | 0                               | 5056                           | 470                           | 1769                            | 2817                           | 2353                          | 2018                            | 685                            |
| <b>Schie-<br/>nenlärm<br/>Lden</b> | Starkbe-<br>lastete ><br>55dB   | 19                            | 367                             | 470                            | 856                           | 0                               | 0                              | 653                           | 203                             | 0                              |
|                                    | Mittelbe-<br>lastete<br>45-55dB | 90                            | 1213                            | 1769                           | 0                             | 3072                            | 0                              | 1898                          | 1118                            | 56                             |
|                                    | Geringbe-<br>lastete <<br>45dB  | 534                           | 2432                            | 2817                           | 0                             | 0                               | 5783                           | 2222                          | 2827                            | 734                            |
| <b>Straßen-<br/>lärm<br/>Lden</b>  | Starkbe-<br>lastete ><br>55dB   | 281                           | 2139                            | 2353                           | 653                           | 1898                            | 2222                           | 4773                          | 0                               | 0                              |
|                                    | Mittelbe-<br>lastete<br>45-55dB | 362                           | 1768                            | 2018                           | 203                           | 1118                            | 2827                           | 0                             | 4148                            | 0                              |
|                                    | Geringbe-<br>lastete <<br>45dB  | 0                             | 105                             | 685                            | 0                             | 56                              | 734                            | 0                             | 0                               | 790                            |

In jedem der 9 Lärmkorridore waren jeweils zumindest 111 +1 vollständige Befragungen durchzuführen, was auch erfolgreich erreicht werden konnte.



## Rücklaufquote

Unter der Rücklaufquote oder Response-Rate wird das Verhältnis von erfolgreichen / vollständigen Befragungen zu versuchten Interviews im Falle des Antreffens einer möglichen Befragungsperson verstanden.

Für die Befragungen zur Gesamtlärbetrachtung Innsbruck wurden Imputations- bzw. Complete-Case-Verfahren von vornherein ausgeschlossen und durch umfangreiche Vorarbeiten auf eine hohe Rücklaufquote gezielt hingearbeitet:

- Alle Interviewerinnen und Interviewer wurden vom Befragungsinstitut sorgfältig ausgewählt und von der Projektleitung zusätzlich geschult, sensibilisiert und mit den wesentlichen Informationen zu Lärmbefragungen vertraut gemacht.
- Die Befragungen wurden auf den Homepages des Landes Tirol und der Stadt Innsbruck, über eine allgemeine Presseaussendung, sowie mehrere Artikel in der *Tiroler Landeszeitung*, in *Innsbruck informiert*, der *Tiroler Tageszeitung*, den *regionews*, *orf.at*, *unsertirol24* u.ä. möglichst publik gemacht.
- Die Lebensrhythmen der Befragten wurden berücksichtigt und Interviews zu verschiedenen Tages(rand-)zeiten durchgeführt, um Berufstätige, Studentinnen und Studenten usw. aller Altersklassen zu erreichen.
- Die zeitliche Dauer der Interviews wurde dergestalt angepasst, dass ein sinnvoller Kompromiss zwischen dem größtmöglichen Informationsgehalt des Fragebogens und nicht allzu überlangen Interviews getroffen wurde, um inkonsistentes Antwortverhalten und Befragungsabbrüche möglichst zu vermeiden.

Offensichtlich bewohnte Adresspunkte an denen keine Personen anzutreffen waren, wurden grundsätzlich zwei Mal zu einem späteren Zeitpunkt erneut aufgesucht. Wurde bei insgesamt drei Versuchen niemand angetroffen, wurde der Adresspunkt gestrichen.

Wurde im Zuge der Befragungen den Interviewerinnen und Interviewern die Wohnungstür geöffnet, stellte sich der / die Interviewer(in) vor, wies sich aus, zeigte das vorbereitete Anschreiben der Projektleitung vor, erläuterte das Vorhaben und bat um ein Interview. Insgesamt wurde den Interviewerinnen und Interviewern im Zuge der Befragungen in 2157 Haushalten die Tür geöffnet.

Nachteilig auf die Rücklaufquote wirkten sich folgende Vorgaben aus:

- Zur Sicherstellung der demographischen Repräsentativität mussten die Interviewerinnen und Interviewer eine repräsentative Verteilung nach Alter und Geschlecht (siehe das Kapitel *Die Stichprobe*) gewährleisten, sodass bei Nichtvorhandensein von gesuchten Zielgruppen in einem Haushalt, ein nächster Haushalt kontaktiert wurde.
- Es konnten nur Personen befragt werden, die zumindest ein Jahr an der jeweiligen Adresse lebten und somit die Lärmsituation ausreichend beurteilen konnten. Die Wanderungsrate in Innsbruck ist aber besonders in den vergangenen Jahren sehr hoch (siehe zu den Wanderungsbewegungen auch die Ausführungen im Unterkapitel *1.3 Stichprobengröße*).
- In Haushalten mit Migrationshintergrund, nicht-deutscher Muttersprache und gleichzeitig niedriger Bildungsschicht kann zumeist nur eine bescheidene Antwortquote erzielt werden. Dieser

Umstand führt zu einer allen Befragungen systemimmanenten Verzerrung bzw. einem nicht vermeidbaren Bias.

Insgesamt 25 Interviews wurden – zumeist wegen anstehender Termine, dringenden Telefonaten, von der Schule heimkommenden Kindern etc. – abgebrochen und mussten daher verworfen werden. In etwa jede zweite tatsächlich angetroffene und befragungsfähige Person wollte aus unterschiedlichen Motiven (Zeitmangel, mangelnde Deutschkenntnisse, kein Interesse, Termine etc.) nicht an den Befragungen zur Gesamtlärmbetrachtung Innsbruck teilnehmen.

Umgekehrt war knapp die Hälfte aller angetroffenen Personen spontan bereit, an den Befragungen teilzunehmen und eine **Gesamtrücklaufquote von insgesamt 47,8%** konnte erreicht werden.

**Tabelle 23: Rücklauf Befragungen Gesamtlärmbetrachtung Innsbruck**

| Lärmkorridor   | Interview durchgeführt | Nicht angetroffen | Kein Interesse | Interview abgebrochen | Summe Kontaktversuche | Summe angetroffene Kontakte | % Rücklauf angetroffene Kontakte |
|----------------|------------------------|-------------------|----------------|-----------------------|-----------------------|-----------------------------|----------------------------------|
| Flug stark     | 111                    | 963               | 184            | 4                     | 1262                  | 299                         | 37%                              |
| Flug mittel    | 111                    | 491               | 118            | 2                     | 722                   | 231                         | 48%                              |
| Flug gering    | 118                    | 528               | 131            | 2                     | 779                   | 251                         | 47%                              |
| Schiene stark  | 111                    | 737               | 121            | 2                     | 971                   | 234                         | 47%                              |
| Schiene mittel | 114                    | 512               | 96             | 3                     | 725                   | 213                         | 54%                              |
| Schiene gering | 118                    | 843               | 126            | 2                     | 1089                  | 246                         | 48%                              |
| Straße stark   | 118                    | 743               | 138            | 1                     | 1000                  | 257                         | 46%                              |
| Straße mittel  | 119                    | 692               | 135            | 5                     | 951                   | 259                         | 46%                              |
| Straße gering  | 111                    | 375               | 52             | 4                     | 542                   | 167                         | 66%                              |
| <b>Gesamt</b>  | <b>1031</b>            | <b>5884</b>       | <b>1101</b>    | <b>25</b>             | <b>8041</b>           | <b>2157</b>                 | <b>47,8%</b>                     |

Dieser Wert gewährleistet eine sehr hohe **Repräsentativität der Ergebnisse**, minimiert systemimnente Bias (Selbstselektion Stichprobenfehler, mangelnde Repräsentativität usw.) und ist für eine Vor-Ort-Befragung in einem urbanen Raum als **außergewöhnlich hoch** einzustufen, liegt diese Rücklaufquote doch um ein Mehrfaches über den Response-Rates aktueller vergleichbarer internationaler Studien.

## Durchführung der Befragungen und Datenkontrolle

Mit der Durchführung der Befragungen wurde das Befragungsinstitut *IMAD Marktforschung und Datenanalysen* im Zuge eines Ausschreibungsverfahrens beauftragt.

Zwischen 16. Mai und 8. Juli 2017 wurden insgesamt 1031 vollständige Vor-Ort-Interviews von 23 geschulten Interviewerinnen und Interviewern im Stadtgebiet von Innsbruck durchgeführt. Die Interviews wurden von Montag bis Samstag zu verschiedenen Uhrzeiten in den Wohnungen der zu Befragenden geführt, um möglichst alle Bevölkerungsschichten, insbesondere auch die arbeitende Bevölkerung, ansprechen zu können. An Sonn- und Feiertagen fanden keine Befragungen statt.

Die Interviewerinnen und Interviewer suchten die vorgegebenen Adresspunkte direkt auf und führten neben eigens angefertigten Ausweisen und einem Anschreiben der Projektleitung auch laminierte Handzettel mit sich, auf welchen die unterschiedlichen im Fragebogen verwendeten Skalen ersichtlich waren, um sie den Probandinnen und Probanden zur besseren Übersichtlichkeit vorlegen zu können. Die Ausweise waren gut ersichtlich an der Kleidung angebracht, weiters sorgte die Verwendung von Taschen versehen mit einem großen Logo und Schriftzug der Stadt Innsbruck für eine gute Erkennbarkeit.

Die ausgefüllten Fragebögen wurden unter Einhaltung der gängigen Qualitätssicherungs- und Datenschutzauflagen händisch von den Mitarbeiterinnen und Mitarbeitern der *IMAD Marktforschung und Datenanalysen* digitalisiert, mit den Adress- und Lärmdaten verschnitten und für die weiterführende statistische Auswertung aufbereitet.

Eine ausführliche Eingabe- und Plausibilitätskontrolle der Datenbank, sowie der Originalfragebögen wurde von der Projektleitung vorgenommen:

- Univariate Plausibilitätskontrolle anhand der deskriptiven Statistik, sowie der graphisch ausgegebenen Häufigkeiten
- Kontrolle auf echte fehlende Werte in der Datenbank
- Kontrolle der Originalfragebögen auf Vollständigkeit, Auffälligkeiten und Stimmigkeit: Insbesondere die Unterschriften, die ausgefüllten Adressdaten, Zeitpunkte der Befragungen, Muster der einzelnen Interviewerinnen und Interviewer etc. wurden gesichtet
- Stichprobenhafte Gegenüberstellung der ausgefüllten Fragebögen und der digitalen Datenbank zur Prüfung auf Eingabe- und Übertragungsfehler
- Dateivergleich der Lärm- und Geodaten der Befragungsdatenbank und der ausgegebenen Ausgangsdaten mittels Excel-Spreadsheet inklusive vollständigem Einzelzellenvergleich

Durch die aufwendige Datenkontrolle konnte sichergestellt werden, dass sich die Ausgangsdatenbank für die Auswertungen auf höchstmöglichem Niveau befindet.

## Datenschutz

In der Durchführung der Befragungen zur Gesamtlärbetrachtung Innsbruck wurden personenbezogene Daten erhoben und verarbeitet, welche laut Datenschutzgesetz 2000 idgF zu keinem Zeitpunkt veröffentlicht oder Unbefugten zugänglich gemacht werden dürfen. Auch dürfen diese Daten in ihrer Auswertung einzelnen Probandinnen und Probanden oder Haushalten nicht zuordenbar sein, weshalb auf die Datenanonymisierung großes Augenmerk gelegt wurde. Des Weiteren ist es untersagt, geschützte personenbezogene Daten unbefugt zu einem anderen als dem zur jeweiligen rechtmäßigen Aufgabenerfüllung gehörenden Zweck zu verarbeiten, bekannt zu geben, zugänglich zu machen oder anderweitig zu nutzen.

Im Besonderen war die Sicherung der Daten vor Verlust, Diebstahl und unbefugter Einsichtnahme zu gewährleisten. Alle beteiligten Institutionen/Personen hatten die Einhaltung der Bestimmungen und Sicherheitsmaßnahmen des §14 DSG 2000 idgF zu gewährleisten. Das Befragungsinstitut IMAD, das mit der Durchführung der Erhebungen beauftragt wurde, hatte eine DVR-Nummer nachzuweisen, sowie eine durchgängige Dokumentation über die Erhebung, die Sicherung, sowie einzelne Verwendungsschritte der erhobenen Daten zu Kontrollzwecken zu führen. Nach Übergabe der Datenbank an die Projektleitung wurden sämtliche Projektunterlagen und Aufzeichnungen (digital und analog), welche beim Befragungsinstitut verblieben waren, gelöscht bzw. vernichtet.

Im Zuge der Vorortbefragungen waren von allen befragten Personen Einverständniserklärungen zur Datenverarbeitung zu unterschreiben. Die Anonymisierung erfolgte daher zweistufig:

(1) Über die Nichtberücksichtigung der Namensdaten in der digitalen Datenbank: Die Ausgangsdatenbank für die Auswertungen enthält einzelnen Adresspunkten zuordenbare Adress- und Lärmdaten, jedoch keine Namen. Nach den Eingabe- und Plausibilitätskontrollen der Datenbank sowie der Originalfragebögen, wurden diese in Kisten verpackt und im Depot des AdTLR zur Aufbewahrung gemäß DSG 2000 idgF in einem unzugänglichen, versperrten Raum eingelagert.

Im Zuge der Auswertung und Berichterlegung war die digitale Datenbank nur 2 Personen (Dr. Schnaiter und Dipl.-HTL-Ing. Mag. Lechner) zugänglich, die eigens dafür angefertigte Datenschutzprotokolle unterschrieben. Die digitale Datenbank wurde ausschließlich verschlüsselt auf internen Datenträgern gespeichert. Sämtliche Projektunterlagen, Aufzeichnungen, Dateien, Auswertungen und Datensätze (digital und analog) sind nach Beendigung des Auftrages zu vernichten.

(2) Über die nicht mehr einer Einzelperson / einem einzelnen Haushalt zuordenbare statistische Auswertung der Daten: Sämtliche Berichte und Präsentationen enthalten Auswertungen und Darstellungen gemäß den Lärmdatenzuordnungen, jedoch keinerlei Adressdaten mehr. Weiters werden keine verortbaren Aussagen über Cluster  $\leq 5$  (Granularität) gemacht, um Zuordnungen jedweder Art ausschließen zu können.

# Statistische Methoden

Die statistischen Auswertungen basieren auf den verorteten Adresspunkten des Zentralen Melderegisters (Stand 01.01.2016) samt den zugeordneten Beurteilungslärmpegeln aus dem Straßen-, Schienen- und Luftverkehr, sowie den erhobenen Daten der Vor-Ort-Befragungen nach der vorgegebenen, geschichteten Random-Adress-Cluster-Stichprobe. Die vollständige Liste aller erfassten Variablen ist in den Anhängen *Deskriptive Statistik der Befragungen* und *Häufigkeitsstatistiken der Befragungen* einsehbar.

Eine elektronische Fassung der korrigierten und konsolidierten Rohdaten inklusive Variablenbenennungen und –Beschriftungen, Wertelabels, Kodierung gruppierter Variablen und Summenscores wurde dem Land Tirol (AdTLR) als Auftraggeberin nach Abschluss der Befragungen am 25.02.2016 schreibgeschützt und verschlüsselt in 2 verschiedenen Dateiformaten (SAV-File SPSS Version 23: Datenbank\_Gesamtlärm IBK\_30-07-2017\_konsolidiert.sav und XLSX-File MS Excel 2013: Datenbank\_Gesamtlärm IBK\_30-07-2017\_konsolidiert.xlsx) digital übermittelt.

## 1. Deskriptive Analyse

Die univariate Auswertung von nominalen bzw. ordinalen Variablen erfolgt durch die Angabe von absoluten bzw. relativen Häufigkeiten, bei ordinalen Parametern mit mehr als zwei Ausprägungen wurden teilweise kumulative Häufigkeiten hinzugefügt. Bei ordinalen Variablen mit einer hohen Anzahl von Ausprägungen (z.B. Scores), sowie bei metrisch skalierten Variablen wurde das arithmetische Mittel als Maßzahl der zentralen Tendenz (Lageparameter) verwendet, um die Vergleichbarkeit mit anderen Studien zu ermöglichen. Eine gleichzeitige Darstellung mit anderen Methoden (Median, Modus etc.) wurde v.a. aus Gründen der Lesbarkeit vermieden. Ergänzt werden diese Auswertungen zum Teil durch die Angabe der passenden Streuungsmaße (Standardabweichung bzw. Minimum/Maximum).

Die Skalierung der Diagramme wurde aufgrund des großen Umfangs an Items und verwendeten Skalen, sowie zur Verdeutlichung der dargestellten inhaltlichen Details nicht einheitlich gewählt, sondern jeweils frei angepasst. Dieser Umstand ist in der Interpretation derselben durch die Leserinnen und Leser zu berücksichtigen.

Der statistische Zusammenhang von metrischen Variablen wurde mit Hilfe des Korrelationskoeffizienten nach Pearson evaluiert. Die mehrdimensionale Gegenüberstellung von Auswertungen erfolgt durch entsprechende Kontingenztabellen bzw. passende Grafiken. Zur Darstellung von Merkmalen von Gruppen mit sehr starker / sehr geringer Ausprägung wurden Extremgruppendarstellungen bzw. –Vergleiche verwendet.

## 2. Extremgruppen

Als wichtiger Indikator und generell zur Herstellung von aussagekräftigen Vergleichen wird in der internationalen Lärmwirkungsforschung und in einer Reihe von vergleichbaren Studien häufig der Prozentsatz von z.B. stark belästigten Personen (highly annoyed) verwendet. Dabei wird das Kollektiv der

Befragten nach Ihrem Antwortverhalten dichotomisiert gruppiert. Diesem Ansatz der Identifizierung von sogenannten Extremgruppen wurde auch in den Analysen dieses Gesamtberichts Rechnung getragen. Als Cut-Off-Point kann entweder ein Prozentsatz von z.B. 75% auf einer Antwortskala gewählt werden, oder es wird ab einer bestimmten Antwortausprägung gruppiert. In den gegenständlichen Auswertungen zur Gesamtlärbetrachtung Innsbruck wurde für die verwendeten 11-er Skalen vor allem eine Gegenüberstellung der zusammengefassten Antwortkategorien 0 bis 2 und der gruppierten Ausprägungen 8, 9 und 10 verwendet.

### 3. Weiterführende Auswertungen und Inferenzstatistik

Der Basisbericht zu den Auswertungen der Befragungen zur Gesamtlärbetrachtung Innsbruck soll auftragsgemäß lediglich erste Einblick in das vorhandene Datenmaterial bieten, sowie vor allem eine Deskription der Häufigkeiten enthalten und einige ausgewählte Zusammenhänge aufzeigen.

Auf Basis des Projektauftrages bleiben daher hypothesenbasierte Auswertungen ebenso wie weiterführende multivariate Analysen, sowie gewichtete adjustierte Dosis-Wirkungskurven etc. einer vertieften wissenschaftlichen Aufarbeitung vorbehalten. Aus diesem Grund und zugunsten der Lesbarkeit wurde größtenteils auf Signifikanztests (Hypothesentests) und die Angabe von p-Werten bzw. Konfidenzintervallen verzichtet. Bei der Überprüfung der Messgenauigkeit der Evaluierung (Cronbachs Alpha) wurde ein p-Wert von 5% als maximal zulässige Irrtumswahrscheinlichkeit bzw. als Signifikanzniveau verwendet.

## AUSWERTUNG DER BEFRAGUNGEN

### Demographie

#### 1. Alter und Geschlecht

Die befragte Personengruppe zeigt eine homogene Verteilung nach Alter und Geschlecht:

**Abbildung 30: Bevölkerungspyramide der befragten Personen nach Altersgruppe und Geschlecht**

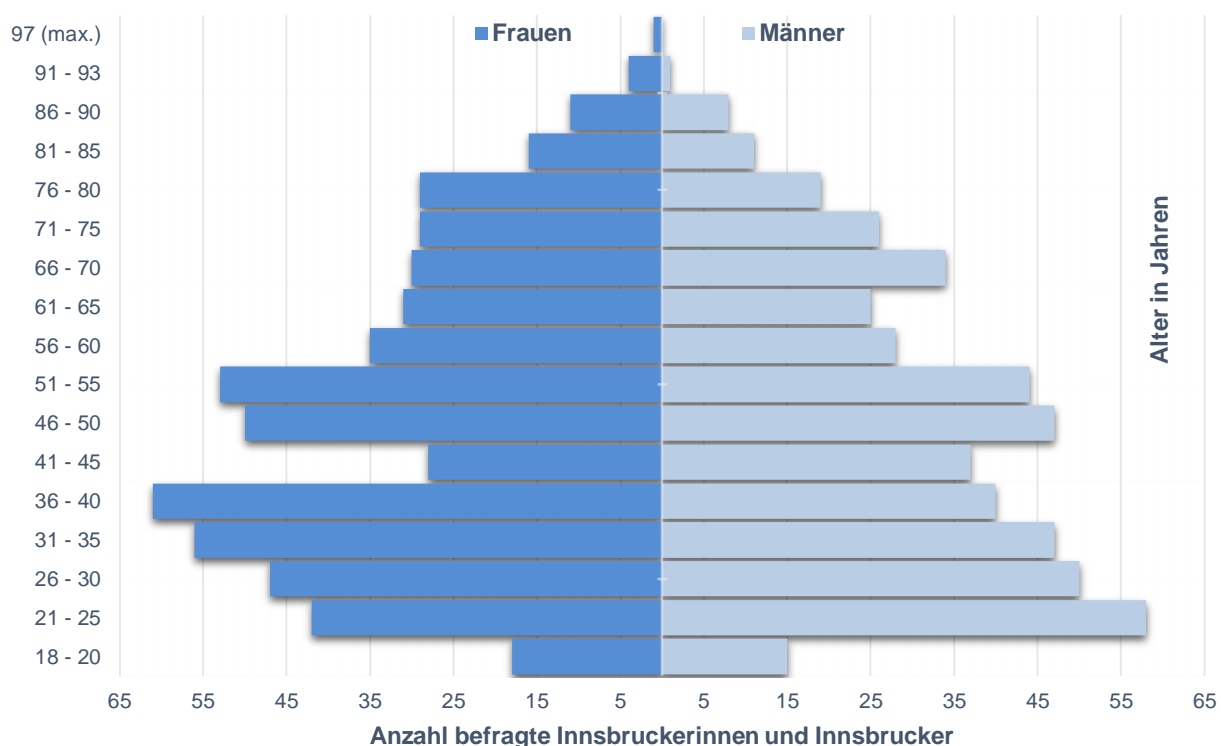

Im Mittel waren die befragten Innsbruckerinnen und Innsbrucker knapp 48 Jahre alt. Die jüngsten 7 Befragten waren zum Zeitpunkt der Befragungen im Sommer 2017 gerade 18 Jahre alt geworden, die älteste Befragte hatte ihren 97. Geburtstag gefeiert:

**Tabelle 24: Mittelwert Alter**

| Mittelwert | Minimum | Maximum | N    |
|------------|---------|---------|------|
| 47,7905    | 18,00   | 97,00   | 1031 |

## 2. Bildung

Um das Bildungsniveau der Befragten zu erheben, wurden die standardisierten 5 Einteilungsklassen zum höchsten bisher erreichten Schulabschluss abgefragt:

**Tabelle 25: Höchster bisher erreichter Bildungsabschluss**

|                                     | Häufigkeit | Gültige Prozente | Kumulierte Prozente |
|-------------------------------------|------------|------------------|---------------------|
| Pflichtschule                       | 98         | 9,5              | 9,5                 |
| Abgeschlossene Lehre                | 166        | 16,1             | 25,6                |
| Fachschule ohne Matura              | 114        | 11,1             | 36,7                |
| Gültig Matura                       | 262        | 25,4             | 62,1                |
| Universität, FH oder Vergleichbares | 388        | 37,6             | 99,7                |
| Keine Angabe                        | 3          | ,3               | 100,0               |
| Gesamt                              | 1031       | 100,0            |                     |

**Abbildung 31: Bildungsschichten kategorisiert nach höchstem erreichten Schulabschluss**

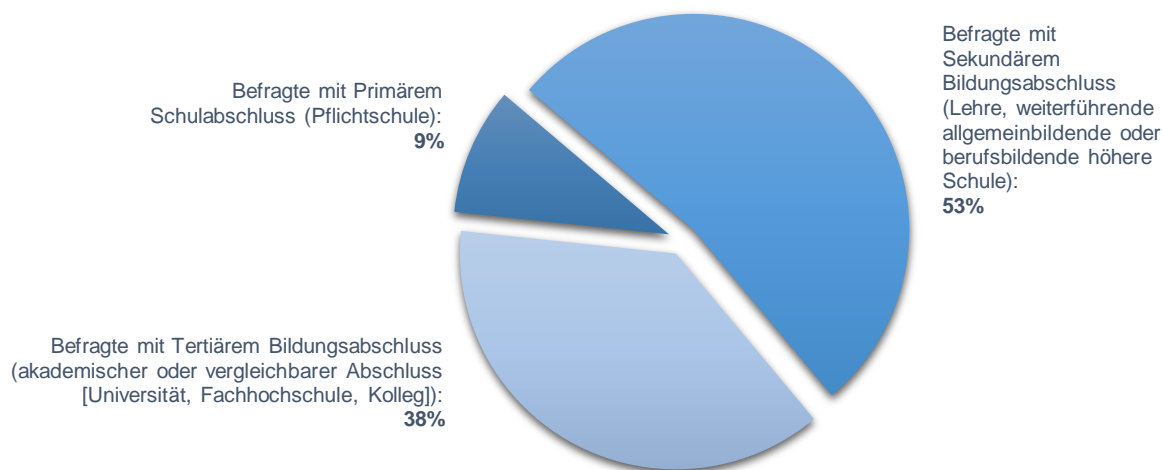

Anm.: 3 Personen machten keine Angaben

Frauen weisen im Vergleich zu den befragten Männern einen höheren Anteil an Personen mit Pflichtschulabschluss auf, liegen allerdings auch bei den tertiären Abschlüssen vor den Männern:



**Abbildung 32: Höchster bisher erreichter Bildungsabschluss nach Geschlecht**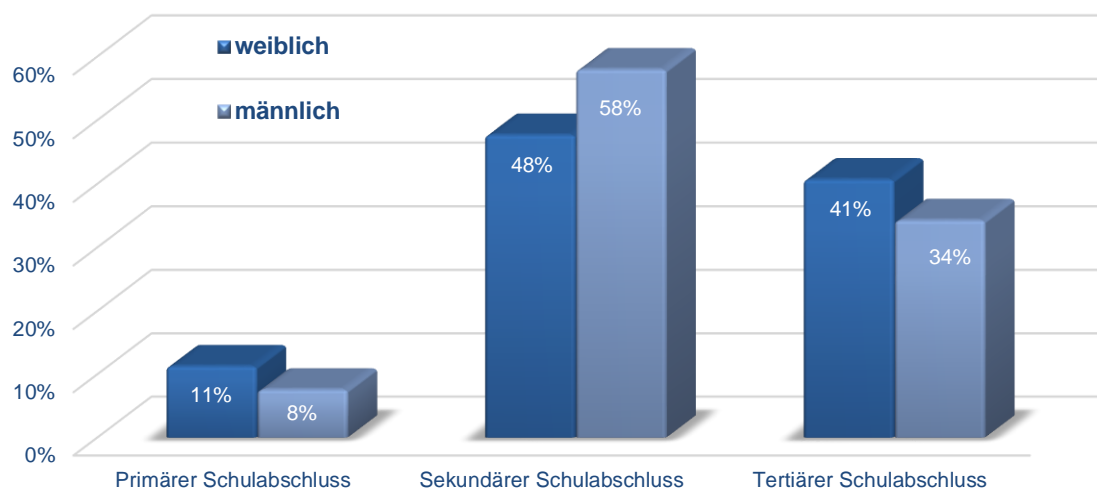

Innerhalb der drei Altersgruppen 18 bis 40, 41 bis 60 und über 60 Jahren lässt sich das ansteigende Bildungsniveau nach Altersklassen ablesen. Dieser Umstand wirkt sich noch deutlicher aus, wenn berücksichtigt wird, dass sich die Gruppe der Studierenden fast zur Gänze in der Altersklasse der unter 40-Jährigen befindet, also ihren höchsten Schulabschluss noch nicht erreicht hat:

**Abbildung 33: Höchster Bildungsabschluss innerhalb kategorisierter Altersgruppen**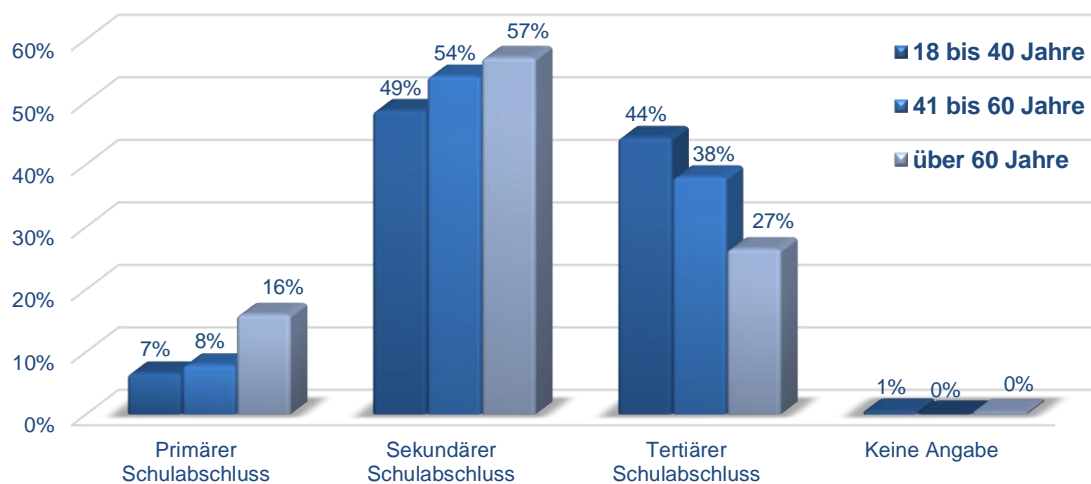

### 3. Berufliche Stellung

Rund die Hälfte der befragten erwachsenen Hauptwohnsitzbevölkerung Innsbrucks über 18 Jahren ist erwerbstätig, der Großteil als Angestellte(r). Ein Viertel aller Befragten stellen Pensionistinnen und Pensionisten – jede(r) 7. Befragte befindet sich noch in Ausbildung:

**Abbildung 34: Berufliche Stellung der Befragten in Prozent**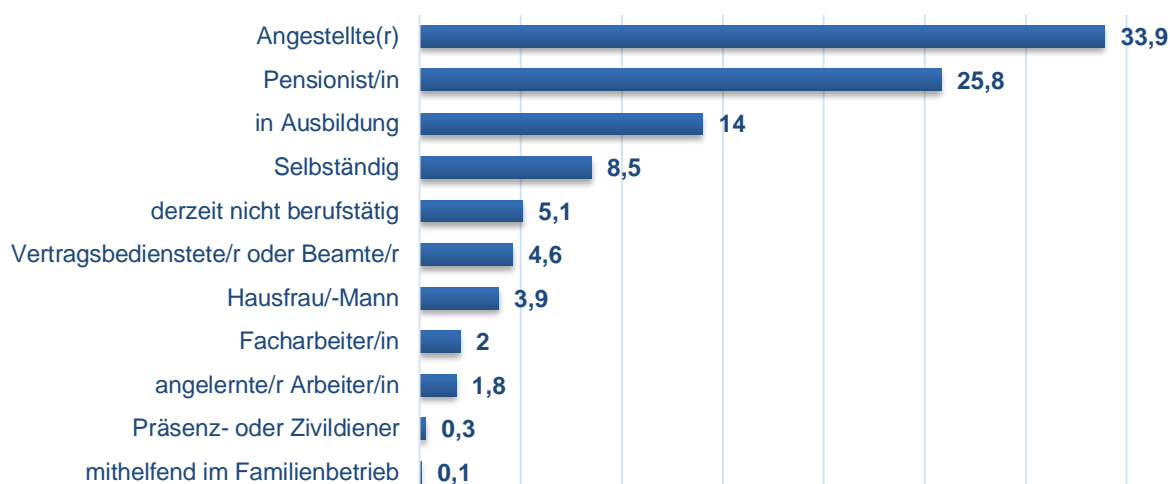

Nach den ILO-Kriterien<sup>5</sup> ergibt sich eine Erwerbstätigenquote von 56,4% im untersuchten Kollektiv. Kategorisiert nach ausbezahltem Erwerbseinkommen durch einen Arbeitgeber bzw. selbstständiges Erwerbseinkommen fällt die Erwerbstätigenquote auf 51,2%.

Die Erwerbstätigenquote, sowie die Art der beruflichen Stellung unterscheiden sich – wie erwartet – auch zwischen den Geschlechtern:

**Tabelle 26: Kreuztabelle Geschlecht und derzeitige berufliche Stellung in Prozent**

|                                     |                                  | Frauen | Männer | Gesamt |
|-------------------------------------|----------------------------------|--------|--------|--------|
| Selbständig                         | % innerhalb von berufl. Stellung | 36,4%  | 63,6%  | 100,0% |
|                                     | % innerhalb von Geschlecht       | 5,9%   | 11,4%  | 8,5%   |
| Angestellte(r)                      | % innerhalb von berufl. Stellung | 54,4%  | 45,6%  | 100,0% |
|                                     | % innerhalb von Geschlecht       | 35,1%  | 32,4%  | 33,9%  |
| Vertragsbedienstete/r oder Beamte/r | % innerhalb von berufl. Stellung | 61,7%  | 38,3%  | 100,0% |
|                                     | % innerhalb von Geschlecht       | 5,4%   | 3,7%   | 4,6%   |
| Facharbeiter/in                     | % innerhalb von berufl. Stellung | 19,0%  | 81,0%  | 100,0% |
|                                     | % innerhalb von Geschlecht       | 0,7%   | 3,5%   | 2,0%   |
| angelernte/r Arbeiter/in            | % innerhalb von berufl. Stellung | 36,8%  | 63,2%  | 100,0% |
|                                     | % innerhalb von Geschlecht       | 1,3%   | 2,4%   | 1,8%   |
| Hausfrau/-Mann                      | % innerhalb von berufl. Stellung | 90,0%  | 10,0%  | 100,0% |
|                                     | % innerhalb von Geschlecht       | 6,7%   | 0,8%   | 3,9%   |
| in Ausbildung                       | % innerhalb von berufl. Stellung | 45,1%  | 54,9%  | 100,0% |
|                                     | % innerhalb von Geschlecht       | 12,0%  | 16,1%  | 14,0%  |
| Präsenz- oder Zivildienstler        | % innerhalb von berufl. Stellung | 0,0%   | 100,0% | 100,0% |
|                                     | % innerhalb von Geschlecht       | 0,0%   | 0,6%   | 0,3%   |
| mithelfend im Familienbetrieb       | % innerhalb von berufl. Stellung | 0,0%   | 100,0% | 100,0% |
|                                     | % innerhalb von Geschlecht       | 0,0%   | 0,2%   | 0,1%   |

<sup>5</sup> Die International Labour Organisation untergliedert die Wohnbevölkerung in Erwerbspersonen (erwerbstätig, arbeitslos) und Nicht-Erwerbspersonen (Personen unter 15 Jahren; Personen mit Pensionsbezug; Schülerinnen und Schüler, sowie Studierende 15 Jahre und älter; sonstige Nicht-Erwerbspersonen). Werden Personen mehr als einer Kategorie zugeordnet, so ist die oben angeführte Reihenfolge ausschlaggebend.

|                           |                                  |        |        |        |
|---------------------------|----------------------------------|--------|--------|--------|
| Pensionist/in             | % innerhalb von berufl. Stellung | 54,9%  | 45,1%  | 100,0% |
|                           | % innerhalb von Geschlecht       | 27,0%  | 24,5%  | 25,8%  |
| derzeit nicht berufstätig | % innerhalb von berufl. Stellung | 60,4%  | 39,6%  | 100,0% |
|                           | % innerhalb von Geschlecht       | 5,9%   | 4,3%   | 5,1%   |
| Gesamt                    | % innerhalb von berufl. Stellung | 52,5%  | 47,5%  | 100,0% |
|                           | % innerhalb von Geschlecht       | 100,0% | 100,0% | 100,0% |

# Wohnen

## 1. Wohndauer im selben Haus / derselben Wohnung

Die durchschnittliche Wohndauer der Befragten in derselben Wohnung bzw. demselben Haus liegt im Mittelwert bei 17,6 Jahren. Rund ein Viertel der Befragten lebt jedoch erst seit maximal 3 Jahren in derselben Wohnung und über 11% erst seit einem vollen Jahr, was die ausgeprägte Wanderungshäufigkeit im urbanen Raum verdeutlicht:

**Tabelle 27: Wohndauer im selben Haus / derselben Wohnung**

|                             | Häufigkeit | Gültige Prozente |
|-----------------------------|------------|------------------|
| Gültig 1 Jahr (min.)        | 118        | 11,4             |
| 1 bis 3 Jahre               | 265        | 25,7             |
| 1 bis 10 Jahre              | 533        | 51,7             |
| über 10 bis 86 Jahre (max.) | 498        | 48,3             |

Die Wohndauer der Befragten in derselben Wohnung bzw. demselben Haus ist weiters stark altersabhängig:

**Abbildung 35: Wohndauer in derselben Wohnung nach Alter**

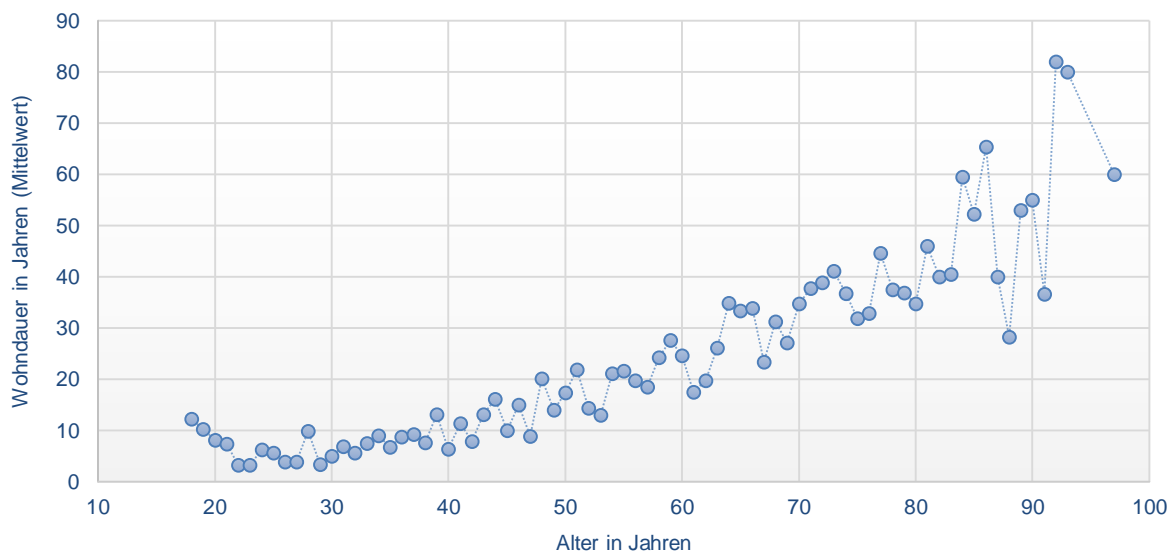

Während die jüngsten Befragten (18+) – meist seit mehreren Jahren – noch gemeinsam mit ihren Eltern wohnen, beträgt die durchschnittliche Wohndauer in der jeweiligen Wohnung bei den jungen Erwachsenen im Mittelwert nur sehr wenige Jahre und steigt mit zunehmendem Alter kontinuierlich an.<sup>6</sup>

<sup>6</sup> Anm.: Die größeren Schwankungen bei den Befragten im Alter von über 80 Jahren sind durch die kleineren Fallzahlen bedingt – Seniorenwohnheime, Krankenanstalten etc. wurden bewusst nicht befragt.

## 2. Art des Wohnhauses und Eigentumsverhältnisse

Dem urbanen Raum entsprechend leben drei Viertel aller befragten Innsbruckerinnen und Innsbrucker in Mehrparteienhäusern, weniger als 20% in alleinstehenden Häusern bzw. Doppelhaushälften:

**Tabelle 28: Art des Wohnhauses**

|                                | Häufigkeit | Gültige Prozente | Kumulierte Prozente |
|--------------------------------|------------|------------------|---------------------|
| Alleinstehendes Haus           | 142        | 13,8             | 13,8                |
| Doppelhaushälfte               | 48         | 4,7              | 18,4                |
| Reihenhaus                     | 58         | 5,6              | 24,1                |
| Mehrparteienhaus <10 Wohnungen | 412        | 40,0             | 64,0                |
| Mehrparteienhaus 10+ Wohnungen | 363        | 35,2             | 99,2                |
| Anderes                        | 8          | ,8               | 100,0               |
| Gesamt                         | 1031       | 100,0            |                     |

Knapp 60% aller Befragten wohnen zur Miete oder sind Mitbewohnerinnen und Mitbewohner, in rund 40% der Fälle besitzen die befragten Personen bzw. deren unmittelbare Familie das Haus / die Wohnung in der sie leben.

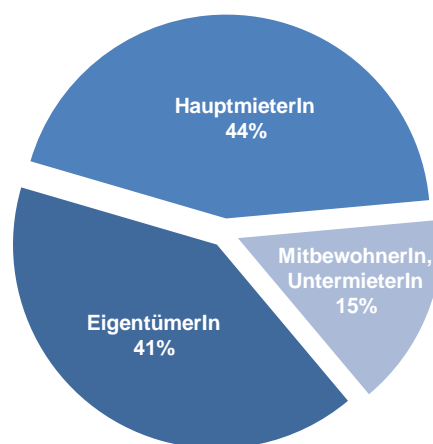

**Abbildung 36: Eigentumsverhältnisse der Wohnung / des Hauses**

## 3. Haushaltsgröße

Im Mittel leben knapp 2,5 Personen in einem durchschnittlichen befragten Haushalt. Zweipersonenhaushalte sind mit 36,6% am häufigsten. Etwas mehr als 21% aller Befragten leben allein:

**Abbildung 37: Haushaltsgröße in Prozent**

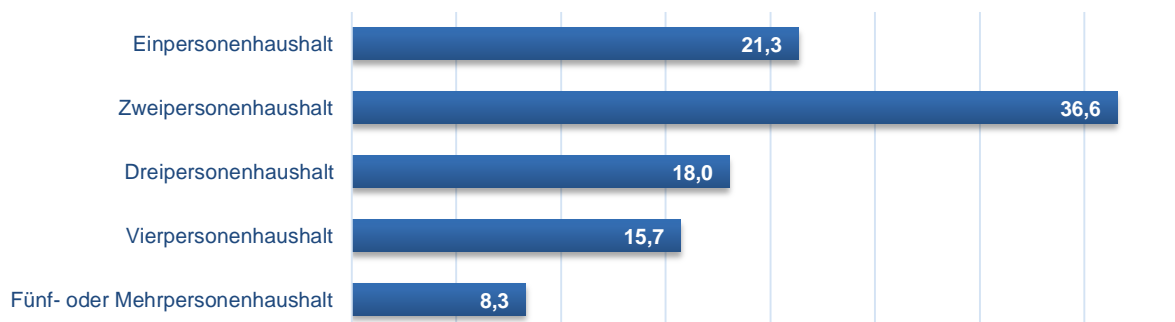

In knapp drei Viertel aller befragten Haushalte leben keine Kinder unter 18 Jahren. Im Mittel wohnen 0,47 Kinder in einem der befragten Innsbrucker Haushalte:

**Tabelle 29: Anzahl an Kindern unter 18 Jahren im selben Haushalt**

|                 | Häufigkeit | Gültige Prozente | Kumulierte Prozente |
|-----------------|------------|------------------|---------------------|
| Keine Kinder    | 762        | 73,9             | 73,9                |
| 1 Kind          | 112        | 10,9             | 84,8                |
| 2 Kinder        | 111        | 10,8             | 95,5                |
| Gültig 3 Kinder | 36         | 3,5              | 99,0                |
| 4 Kinder        | 7          | ,7               | 99,7                |
| 5 Kinder        | 3          | ,3               | 100,0               |
| Gesamt          | 1031       | 100,0            |                     |

#### 4. Stockwerk des Schlafzimmers

Die Höhe der Schlafräume über Straßenniveau ist für die Lärmwahrnehmung und –Belastung von großer Bedeutung. Über 80% der befragten Innsbruckerinnen und Innsbrucker haben ihr Schlafzimmer zwischen Erdgeschoß, erstem und zweitem Stockwerk angesiedelt:

**Tabelle 30: Stockwerk des Schlafzimmers**

|                 | Häufigkeit | Gültige Prozente | Kumulierte Prozente |
|-----------------|------------|------------------|---------------------|
| 2. Untergeschoß | 1          | 0,1              | 0,1                 |
| 1. Untergeschoß | 3          | 0,3              | 0,4                 |
| Erdgeschoß      | 230        | 22,3             | 22,7                |
| 1. Stock        | 363        | 35,2             | 57,9                |
| 2. Stock        | 230        | 22,3             | 80,2                |
| 3. Stock        | 122        | 11,8             | 92,0                |
| Gültig 4. Stock | 63         | 6,1              | 98,2                |
| 5. Stock        | 11         | 1,1              | 99,2                |
| 7. Stock        | 1          | 0,1              | 99,3                |
| 8. Stock        | 3          | 0,3              | 99,6                |
| 9. Stock        | 1          | 0,1              | 99,7                |
| 10. Stock       | 2          | 0,2              | 99,9                |
| 11. Stock       | 1          | 0,1              | 100,0               |
| Gesamt          | 1031       | 100,0            |                     |

## 5. Vorhandene Abschirmungen

### 5.1. Bauliche Abschirmungen

Drei Viertel aller Befragten geben an, dass die Wohnung / das Haus in dem sie wohnen gar nicht oder nur sehr geringfügig durch bauliche Abschirmungen wie Gebäude, Mauern etc. vor Verkehrslärm geschützt ist. Knapp ein Viertel der befragten Innsbruckerinnen und Innsbrucker gibt hingegen an, zum Großteil oder vollständig vom Verkehrslärm abgeschirmt zu wohnen:

**Abbildung 38: Schutz vor Verkehrslärm durch bauliche Abschirmungen in Prozent**

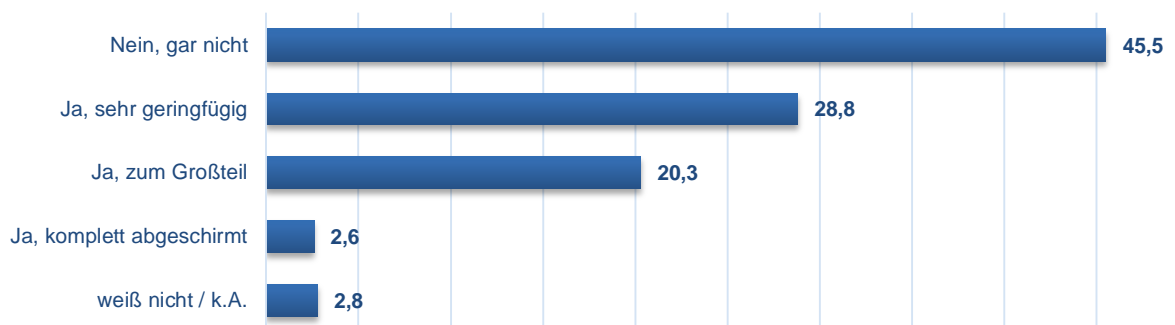

### 5.2. Innenhof / Lärmabgewandte Seite

Über zwei Drittel der Befragten sagen aus, ihre Wohnung bzw. das Haus, in dem sie wohnen, hätte einen vor Verkehrslärm geschützten Innenhof bzw. eine lärmabgewandte Seite:

**Tabelle 31: Schutz vor Verkehrslärm durch Innenhof bzw. lärmabgewandte Seite**

|        | Häufigkeit       | Gültige Prozente | Kumulierte Prozente |
|--------|------------------|------------------|---------------------|
| Gültig | Ja               | 701              | 68,0                |
|        | Nein             | 308              | 29,9                |
|        | weiß nicht/ k.A. | 22               | 2,1                 |
|        | Gesamt           | 1031             | 100,0               |

Es besteht ein signifikanter Zusammenhang (Pearsons Rho=0,67) zum *Gefühl der Ausgesetztheit gegenüber Verkehrslärm*, der *Belästigung durch Lärm insgesamt* und der *Belästigung durch Lärm in der Nacht*. Befragte, die über einen vor Verkehrslärm geschützten Innenhof verfügen, oder deren Wohnung / Haus eine lärmabgewandte Seite aufweist, fühlen sich im Mittel bei allen 3 Fragestellungen um rund eine halbe Antwortkategorie geringer belästigt bzw. ausgesetzt.

## 6. Lärmschutzfenster

Dezidiert über Lärmschutzfenster zu verfügen, geben 18% der Befragten an, knapp 17% wissen darüber nicht Bescheid und rund zwei Drittel haben keine Lärmschutzfenster verbaut:

**Tabelle 32: Verbaute Lärmschutzfenster in den letzten 10 Jahren**

|                  | Häufigkeit | Gültige Prozente | Kumulierte Prozente |
|------------------|------------|------------------|---------------------|
| Gültig           |            |                  |                     |
| Ja               | 187        | 18,1             | 18,1                |
| Nein             | 672        | 65,2             | 83,3                |
| weiß nicht/ k.A. | 172        | 16,7             | 100,0               |
| Gesamt           | 1031       | 100,0            |                     |

Die 187 Befragten, die angeben über Lärmschutzfenster in ihrer Wohnung / ihrem Haus zu verfügen, wurden weiters gefragt, vor welcher Lärmquelle diese Lärmschutzfenster vorrangig schützen sollen: Knapp 60% geben den Straßenverkehrslärm als Hauptgrund an, gefolgt von Fluglärm und anderen Lärmquellen mit jeweils rund 15%:

**Abbildung 39: Vorrangiges Schutzziel der Lärmschutzfenster nach Lärmquelle in Prozent**

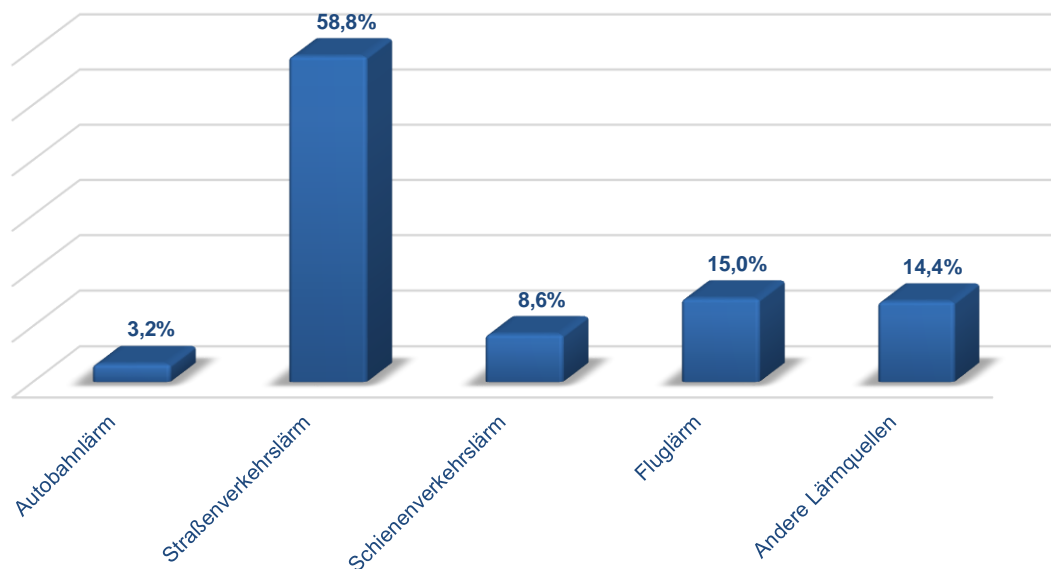



## Mobilität

### 1. Pendlerinnen und Pendler

Nur 9% aller Befragten pendeln zur Arbeits- oder Ausbildungszwecken aus der Tiroler Landeshauptstadt in anderen Umlandgemeinden:

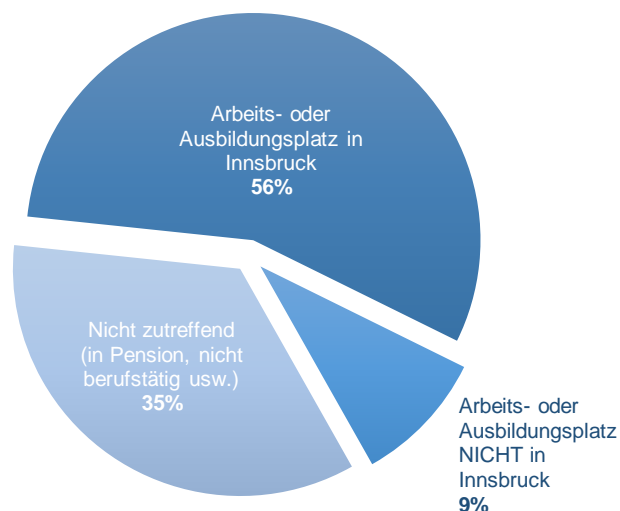

**Abbildung 40: Auspendleranteil gesamt in Prozent**

Der Anteil an Auspendlerinnen und Auspendlern unter den berufstätigen bzw. sich in Ausbildung befindlichen befragten Innsbruckerinnen und Innsbruckern (ohne Nichtzutreffende, die sich in Pension befinden, nicht berufstätig sind usw.) beträgt 14,6%:

**Tabelle 33: Auspendleranteil an den berufstätigen bzw. sich in Ausbildung befindlichen befragten Innsbruckerinnen und Innsbruckern (ohne Nichtzutreffende)**

|                                                       |       |
|-------------------------------------------------------|-------|
| Arbeits- oder Ausbildungsplatz in Innsbruck           | 573   |
|                                                       | 85,4% |
| Arbeits- oder Ausbildungsplatz NICHT in Innsbruck     | 98    |
|                                                       | 14,6% |
| Gesamt                                                | 671   |
|                                                       | 100%  |
| Nicht zutreffend (in Pension, nicht berufstätig etc.) | 359   |
| Keine Angabe                                          | 1     |
| Gesamt                                                | 1031  |

Das von den berufstätigen bzw. sich in Ausbildung befindlichen Befragten (ohne Nichtzutreffende, die sich in Pension befinden, nicht berufstätig sind usw.) insgesamt vorrangig benutzte Verkehrsmittel auf dem Weg zum Arbeits- oder Ausbildungsplatz ist das Auto. Allerdings nutzen fast gleich viele Befragte (>30%) das Fahrrad, knapp ein Viertel öffentliche Verkehrsmittel und knapp 16% gehen zu Fuß:

**Abbildung 41: Vorrangiges Verkehrsmittel auf dem Weg zum Arbeits- oder Ausbildungsplatz in Prozent**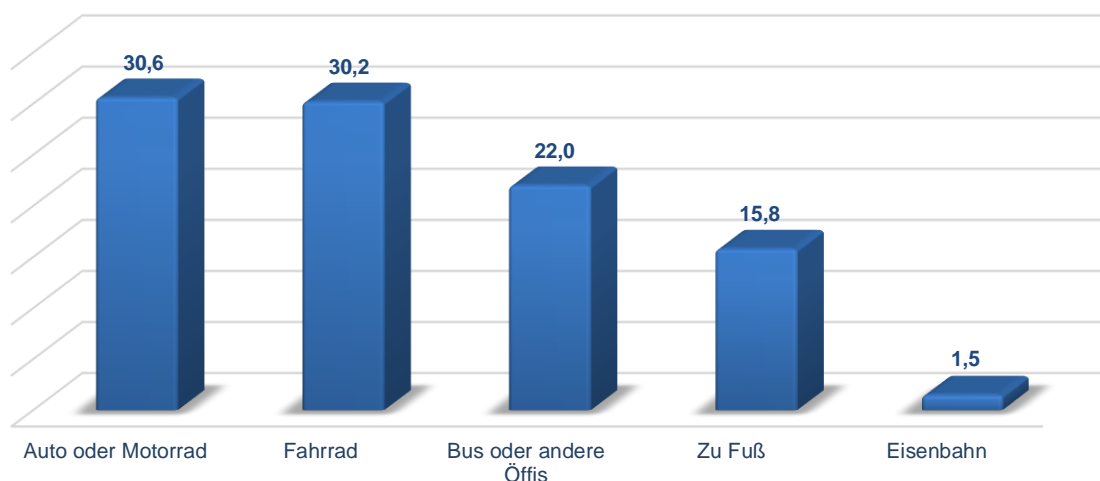

## 2. Mobilität im Alltag

### 2.1. Kraftfahrzeugnutzung als FahrerIn / Fahrer

Knapp 50% der Befragten nutzen regelmäßig (mehrmals pro Woche bis fast täglich) ein Auto als FahrerIn / Fahrer, mehr als ein Viertel hingegen nie oder fast nie. Insgesamt verfügen über 70% aller Befragten über einen Führerschein, knapp 30% nicht bzw. nutzen diesen nicht:

**Abbildung 42: Häufigkeit der Nutzung von Kraftfahrzeugen als FahrerIn / Fahrer in Prozent**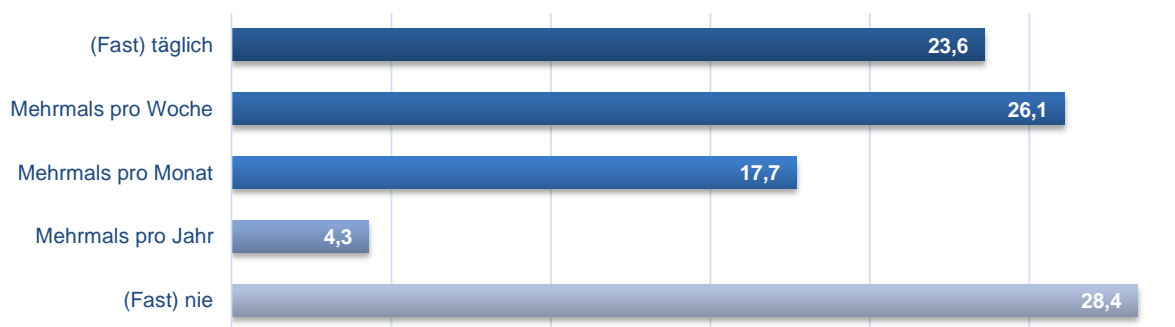**Tabelle 34: Häufigkeit der Nutzung von Kraftfahrzeugen als FahrerIn / Fahrer gruppiert**

|        | Häufigkeit            | Gültige Prozente | Kumulierte Prozente |
|--------|-----------------------|------------------|---------------------|
| Gültig | Starke Nutzung        | 512              | 49,7                |
|        | Gelegentliche Nutzung | 182              | 67,3                |
|        | Geringe Nutzung       | 337              | 100,0               |
|        | Gesamt                | 1031             | 100,0               |

Die Häufigkeit der Nutzung eines Kraftfahrzeuges als FahrerIn / Fahrer hängt stark mit der Lage der eigenen Wohnung / des eigenen Hauses zusammen. Bewohnerinnen und Bewohner des Zentrums

von Innsbruck (am stärksten ausgeprägt in der Katastralgemeinde Innsbruck, aber auch in Hötting, Pradl und Wilten ist dieser Effekt nachzuvollziehen) fahren wesentlich weniger mit dem Auto, als dies in Arzl, Mühlau und besonders in Igls und Vill der Fall ist. Weiters ergibt sich eine Funktion in Abhängigkeit von der Anzahl der Wohnungen, in der die befragte Person lebt: Je mehr Parteien im selben Wohnhaus, desto weniger werden private PKW's genutzt.

Männer benutzen signifikant häufiger ein Kraftfahrzeug als Fahrer als Frauen dies tun und die Altersklasse der 41- bis 60-Jährigen nutzt PKW's deutlich häufiger als die jüngere und die ältere Altersklasse, im Besonderen wenn minderjährige Kinder im selben Haushalt leben. Die Kfz-Nutzung steigt weiters mit steigendem Bildungsgrad an:

**Tabelle 35: Nutzung von Kfz als Fahrerin / Fahrer und ausgewählte Variablen (gruppiert)**

|                                     | Starke Nutzung |            | Gelegentliche Nutzung |            | Geringe Nutzung |            |
|-------------------------------------|----------------|------------|-----------------------|------------|-----------------|------------|
|                                     | Anzahl         | Zeilen (%) | Anzahl                | Zeilen (%) | Anzahl          | Zeilen (%) |
| Amras                               | 34             | 56,7%      | 4                     | 6,7%       | 22              | 36,7%      |
| Arzl                                | 67             | 65,7%      | 13                    | 12,7%      | 22              | 21,6%      |
| Hötting                             | 120            | 49,4%      | 54                    | 22,2%      | 69              | 28,4%      |
| Igls                                | 27             | 77,1%      | 4                     | 11,4%      | 4               | 11,4%      |
| Innsbruck                           | 58             | 33,0%      | 36                    | 20,5%      | 82              | 46,6%      |
| Mühlau                              | 32             | 64,0%      | 8                     | 16,0%      | 10              | 20,0%      |
| Pradl                               | 90             | 47,9%      | 25                    | 13,3%      | 73              | 38,8%      |
| Vill                                | 17             | 81,0%      | 2                     | 9,5%       | 2               | 9,5%       |
| Wilten                              | 67             | 42,9%      | 36                    | 23,1%      | 53              | 34,0%      |
| weiblich                            | 246            | 45,5%      | 88                    | 16,3%      | 207             | 38,3%      |
| männlich                            | 266            | 54,3%      | 94                    | 19,2%      | 130             | 26,5%      |
| 18 bis 40 Jahre                     | 198            | 45,0%      | 93                    | 21,1%      | 149             | 33,9%      |
| 41 bis 60 Jahre                     | 184            | 58,2%      | 61                    | 19,3%      | 71              | 22,5%      |
| über 60 Jahre                       | 130            | 47,3%      | 28                    | 10,2%      | 117             | 42,5%      |
| Primärer Schulabschluss             | 36             | 36,7%      | 7                     | 7,1%       | 55              | 56,1%      |
| Sekundärer Schulabschluss           | 270            | 49,8%      | 93                    | 17,2%      | 179             | 33,0%      |
| Tertiärer Schulabschluss            | 204            | 52,6%      | 82                    | 21,1%      | 102             | 26,3%      |
| Haushalt ohne minderjährige Kinder  | 351            | 46,1%      | 136                   | 17,8%      | 275             | 36,1%      |
| Haushalt mit minderjährigen Kindern | 161            | 59,9%      | 46                    | 17,1%      | 62              | 23,0%      |
| Alleinstehendes Haus                | 102            | 71,8%      | 14                    | 9,9%       | 26              | 18,3%      |
| Doppelhaushälfte                    | 33             | 68,8%      | 9                     | 18,8%      | 6               | 12,5%      |
| Reihenhaus                          | 35             | 60,3%      | 15                    | 25,9%      | 8               | 13,8%      |
| Mehrparteienhaus <10 Wohnungen      | 189            | 45,9%      | 75                    | 18,2%      | 148             | 35,9%      |
| Mehrparteienhaus 10+ Wohnungen      | 152            | 41,9%      | 68                    | 18,7%      | 143             | 39,4%      |

## 2.2. Nutzung öffentlicher Verkehrsmittel in der Stadt

Knapp 60% der Befragten nutzen täglich bis mehrmals pro Monat öffentliche Verkehrsmittel in der Stadt. Über ein Viertel tut dies hingegen (fast) nie:

**Abbildung 43: Häufigkeit der Nutzung öffentlicher Verkehrsmittel in Innsbruck in Prozent**

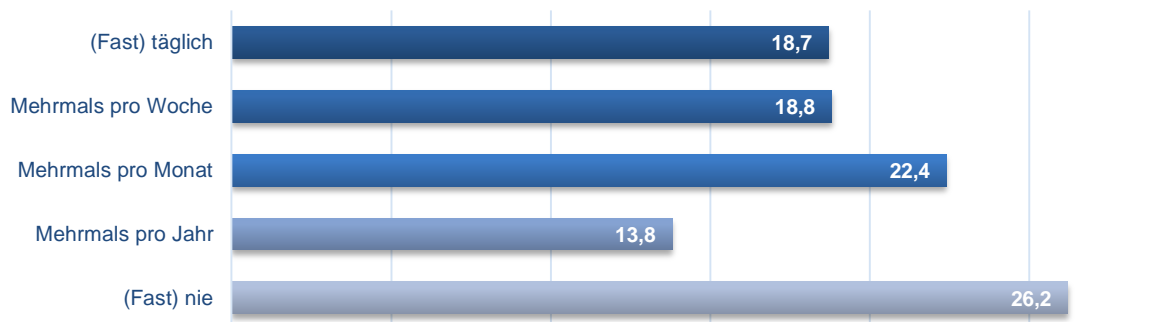

**Tabelle 36: Häufigkeit der Nutzung öffentlicher Verkehrsmittel innerhalb der Stadt gruppiert**

|                        | Häufigkeit | Gültige Prozente | Kumulierte Prozente |
|------------------------|------------|------------------|---------------------|
| Starke Nutzung         | 387        | 37,5             | 37,5                |
| Gelegentliche Nutzung  | 231        | 22,4             | 59,9                |
| Gültig Geringe Nutzung | 412        | 40,0             | 99,9                |
| Keine Angabe           | 1          | ,1               | 100,0               |
| Gesamt                 | 1031       | 100,0            |                     |

Die Häufigkeit der Nutzung öffentlicher Verkehrsmittel unterscheidet sich zum Teil sehr deutlich zwischen den Katastralgemeinden, Haushalte mit minderjährigen Kindern und Männer fahren weniger häufig mit öffentlichen Verkehrsmitteln. Auch sinkt die Nutzungshäufigkeit mit steigendem Bildungsgrad:

**Tabelle 37: Nutzung öffentl. Verkehrsmittel in der Stadt und ausgewählte Variablen (gruppiert)**

|           | Starke Nutzung |            | Gelegentliche Nutzung |            | Geringe Nutzung |            |
|-----------|----------------|------------|-----------------------|------------|-----------------|------------|
|           | Anzahl         | Zeilen (%) | Anzahl                | Zeilen (%) | Anzahl          | Zeilen (%) |
| Amras     | 27             | 45,0%      | 10                    | 16,7%      | 23              | 38,3%      |
| Arzl      | 37             | 36,3%      | 24                    | 23,5%      | 41              | 40,2%      |
| Hötting   | 101            | 41,7%      | 52                    | 21,5%      | 89              | 36,8%      |
| Igls      | 14             | 40,0%      | 18                    | 51,4%      | 3               | 8,6%       |
| Innsbruck | 63             | 35,8%      | 37                    | 21,0%      | 76              | 43,2%      |
| Mühlau    | 13             | 26,0%      | 12                    | 24,0%      | 25              | 50,0%      |
| Pradl     | 78             | 41,5%      | 35                    | 18,6%      | 75              | 39,9%      |
| Vill      | 9              | 42,9%      | 6                     | 28,6%      | 6               | 28,6%      |
| Wilten    | 45             | 28,8%      | 37                    | 23,7%      | 74              | 47,4%      |
| weiblich  | 219            | 40,5%      | 118                   | 21,8%      | 204             | 37,7%      |
| männlich  | 168            | 34,4%      | 113                   | 23,1%      | 208             | 42,5%      |

|                                     |     |       |     |       |     |       |
|-------------------------------------|-----|-------|-----|-------|-----|-------|
| 18 bis 40 Jahre                     | 164 | 37,3% | 100 | 22,7% | 176 | 40,0% |
| 41 bis 60 Jahre                     | 96  | 30,5% | 68  | 21,6% | 151 | 47,9% |
| über 60 Jahre                       | 127 | 46,2% | 63  | 22,9% | 85  | 30,9% |
| Primärer Schulabschluss             | 41  | 42,3% | 22  | 22,7% | 34  | 35,1% |
| Sekundärer Schulabschluss           | 209 | 38,6% | 122 | 22,5% | 211 | 38,9% |
| Tertiärer Schulabschluss            | 136 | 35,1% | 86  | 22,2% | 166 | 42,8% |
| Haushalt ohne minderjährige Kinder  | 310 | 40,7% | 161 | 21,2% | 290 | 38,1% |
| Haushalt mit minderjährigen Kindern | 77  | 28,6% | 70  | 26,0% | 122 | 45,4% |

### 2.3. Nutzung öffentlicher Verkehrsmittel außerhalb der Stadt

Die Nutzung von öffentlichen Verkehrsmitteln (Eisenbahn, Autobusse) außerhalb der Stadt Innsbruck beschränkt sich bei den Befragten größtenteils auf Gelegenheitsnutzungen, was direkt mit dem geringen Auspendleranteil in der Landeshauptstadt Innsbruck assoziiert ist:

**Abbildung 44: Häufigkeit der Nutzung öffentl. Verkehrsmittel außerhalb von Innsbruck in %**

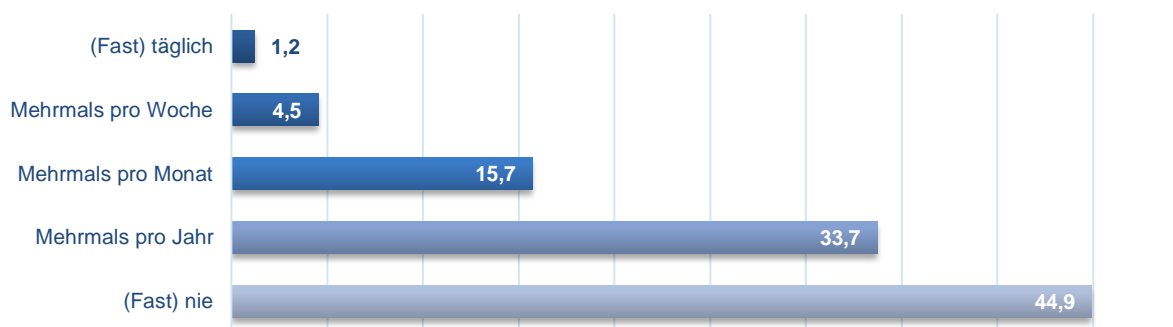

**Tabelle 38: Häufigkeit der Nutzung öffentl. Verkehrsmittel außerhalb von Innsbruck gruppiert**

|                        | Häufigkeit | Gültige Prozente | Kumulierte Prozente |
|------------------------|------------|------------------|---------------------|
| Starke Nutzung         | 58         | 5,6              | 5,6                 |
| Gelegentliche Nutzung  | 162        | 15,7             | 21,3                |
| Gültig Geringe Nutzung | 810        | 78,6             | 99,9                |
| Keine Angabe           | 1          | ,1               | 100,0               |
| Gesamt                 | 1031       | 100,0            |                     |

**Tabelle 39: Nutzung öffentl. Verkehrsmittel außerhalb der Stadt u. ausgew. Variablen (gruppiert)**

|         | Starke Nutzung |            | Gelegentliche Nutzung |            | Geringe Nutzung |            |
|---------|----------------|------------|-----------------------|------------|-----------------|------------|
|         | Anzahl         | Zeilen (%) | Anzahl                | Zeilen (%) | Anzahl          | Zeilen (%) |
| Amras   | 5              | 8,3%       | 14                    | 23,3%      | 41              | 68,3%      |
| Arzl    | 5              | 4,9%       | 14                    | 13,7%      | 83              | 81,4%      |
| Hötting | 18             | 7,4%       | 39                    | 16,1%      | 185             | 76,4%      |

|                                     |    |      |     |       |     |       |
|-------------------------------------|----|------|-----|-------|-----|-------|
| Igls                                | 0  | 0,0% | 10  | 28,6% | 25  | 71,4% |
| Innsbruck                           | 9  | 5,1% | 37  | 21,0% | 130 | 73,9% |
| Mühlau                              | 1  | 2,0% | 2   | 4,0%  | 47  | 94,0% |
| Pradl                               | 6  | 3,2% | 21  | 11,2% | 161 | 85,6% |
| Vill                                | 1  | 4,8% | 4   | 19,0% | 16  | 76,2% |
| Wilten                              | 13 | 8,3% | 21  | 13,5% | 122 | 78,2% |
| weiblich                            | 33 | 6,1% | 77  | 14,2% | 431 | 79,7% |
| männlich                            | 25 | 5,1% | 85  | 17,4% | 379 | 77,5% |
| 18 bis 40 Jahre                     | 32 | 7,3% | 78  | 17,7% | 330 | 75,0% |
| 41 bis 60 Jahre                     | 13 | 4,1% | 35  | 11,1% | 267 | 84,8% |
| über 60 Jahre                       | 13 | 4,7% | 49  | 17,8% | 213 | 77,5% |
| Primärer Schulabschluss             | 6  | 6,2% | 11  | 11,3% | 80  | 82,5% |
| Sekundärer Schulabschluss           | 30 | 5,5% | 81  | 14,9% | 431 | 79,5% |
| Tertiärer Schulabschluss            | 22 | 5,7% | 69  | 17,8% | 297 | 76,5% |
| Alleinstehendes Haus                | 6  | 4,2% | 20  | 14,1% | 116 | 81,7% |
| Doppelhaushälfte                    | 0  | 0,0% | 5   | 10,4% | 43  | 89,6% |
| Reihenhaus                          | 3  | 5,2% | 6   | 10,3% | 49  | 84,5% |
| Mehrparteienhaus <10 Wohnungen      | 19 | 4,6% | 69  | 16,7% | 324 | 78,6% |
| Mehrparteienhaus 10+ Wohnungen      | 30 | 8,3% | 60  | 16,5% | 273 | 75,2% |
| Haushalt ohne minderjährige Kinder  | 46 | 6,0% | 127 | 16,7% | 588 | 77,3% |
| Haushalt mit minderjährigen Kindern | 12 | 4,5% | 35  | 13,0% | 222 | 82,5% |

## 2.4. Nutzung von Fahrrädern

Über 45% aller befragten Innsbruckerinnen und Innsbrucker nutzen über alle Altersklassen hinweg regelmäßig (täglich bis mehrmals pro Woche) ein Fahrrad und halten damit den regelmäßigen Autofahrerinnen und Autofahrern (49,7%) fast die Waage. Rund ein Drittel der Befragten benutzt (fast) nie ein Fahrrad:

**Abbildung 45: Häufigkeit der Nutzung von Fahrrädern in Prozent**

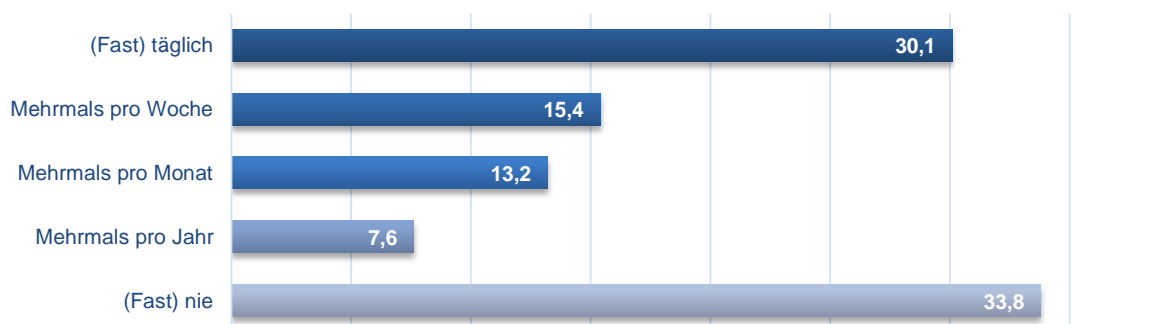

**Tabelle 40: Häufigkeit der Nutzung eines Fahrrads gruppiert**

|                       | Häufigkeit | Gültige Prozente | Kumulierte Prozente |
|-----------------------|------------|------------------|---------------------|
| Starke Nutzung        | 469        | 45,5             | 45,5                |
| Gelegentliche Nutzung | 136        | 13,2             | 58,7                |
| Geringe Nutzung       | 426        | 41,3             | 100,0               |
| Gesamt                | 1031       | 100,0            |                     |

In den inneren Stadtteilen von Innsbruck wird wesentlich häufiger ein Fahrrad zur Fortbewegung benutzt, als in Amras, Arzl, Igls oder Vill. Mehr als jede(r) Zweite 18-bis 40-Jährige in Innsbruck nutzt regelmäßig ein Fahrrad. Mit zunehmendem Alter sinkt die Häufigkeit der Nutzung von Fahrrädern stark. Männer nutzen häufiger ein Fahrrad für ihre Wege in der Stadt als Frauen. Auffällig ist die starke Zunahme der Fahrradnutzung mit ansteigendem Bildungsniveau, eine Funktion, die auch nach Adjustierung des Altersfaktors erhalten bleibt:

**Tabelle 41: Nutzung eines Fahrrads und ausgewählte Variablen (gruppiert)**

|                           | Starke Nutzung |            | Gelegentliche Nutzung |            | Geringe Nutzung |            |
|---------------------------|----------------|------------|-----------------------|------------|-----------------|------------|
|                           | Anzahl         | Zeilen (%) | Anzahl                | Zeilen (%) | Anzahl          | Zeilen (%) |
| Amras                     | 19             | 31,7%      | 8                     | 13,3%      | 33              | 55,0%      |
| Arzl                      | 39             | 38,2%      | 7                     | 6,9%       | 56              | 54,9%      |
| Hötting                   | 117            | 48,1%      | 36                    | 14,8%      | 90              | 37,0%      |
| Igls                      | 9              | 25,7%      | 8                     | 22,9%      | 18              | 51,4%      |
| Innsbruck                 | 86             | 48,9%      | 29                    | 16,5%      | 61              | 34,7%      |
| Mühlau                    | 21             | 42,0%      | 12                    | 24,0%      | 17              | 34,0%      |
| Pradl                     | 89             | 47,3%      | 19                    | 10,1%      | 80              | 42,6%      |
| Vill                      | 5              | 23,8%      | 2                     | 9,5%       | 14              | 66,7%      |
| Wilten                    | 84             | 53,8%      | 15                    | 9,6%       | 57              | 36,5%      |
| weiblich                  | 233            | 43,1%      | 65                    | 12,0%      | 243             | 44,9%      |
| männlich                  | 236            | 48,2%      | 71                    | 14,5%      | 183             | 37,3%      |
| 18 bis 40 Jahre           | 245            | 55,7%      | 63                    | 14,3%      | 132             | 30,0%      |
| 41 bis 60 Jahre           | 144            | 45,6%      | 49                    | 15,5%      | 123             | 38,9%      |
| über 60 Jahre             | 80             | 29,1%      | 24                    | 8,7%       | 171             | 62,2%      |
| Primärer Schulabschluss   | 28             | 28,6%      | 11                    | 11,2%      | 59              | 60,2%      |
| Sekundärer Schulabschluss | 224            | 41,3%      | 71                    | 13,1%      | 247             | 45,6%      |
| Tertiärer Schulabschluss  | 215            | 55,4%      | 54                    | 13,9%      | 119             | 30,7%      |

## 2.5. Fußläufige Wege

Über 60% der Befragten gehen (fast) täglich länger als 10 Minuten zu Fuß, über 27% tun dies mehrmals pro Woche. Nur rund 5% tun dies (fast) nie oder nur mehrmals pro Jahr. Aus der Zusammenschau mit den Variablen zur Einschätzung des eigenen Gesundheitszustandes und zum Alter der Befragten wird ersichtlich, dass die letztgenannte Gruppe, welche kaum mehr als 10 Minuten am

Stück zu Fuß geht, überwiegend mit gesundheitlichen bzw. physischen Einschränkungen zu kämpfen hat:

**Abbildung 46: Häufigkeit fußläufiger Wege in Prozent**

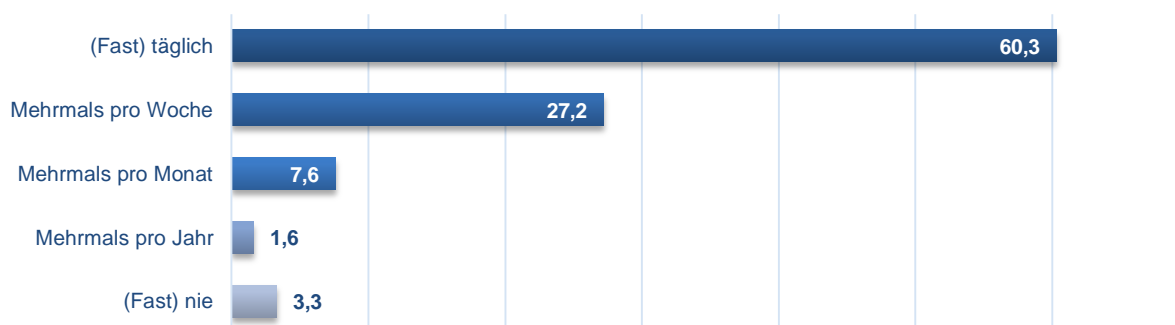

**Tabelle 42: Häufigkeit fußläufiger Wege gruppiert**

|        | Häufigkeit               | Gültige Prozente | Kumulierte Prozente |
|--------|--------------------------|------------------|---------------------|
| Gültig | Regelmäßige FußgeherIn   | 902              | 87,5                |
|        | Gelegentliche FußgeherIn | 78               | 7,6                 |
|        | Seltene FußgeherIn       | 51               | 4,9                 |
|        | Gesamt                   | 1031             | 100,0               |

**Tabelle 43: Fußläufige Wege und ausgewählte Variablen (gruppiert)**

|                           | Regelmäßige FußgeherIn |            | Gelegentliche FußgeherIn |            | Seltene FußgeherIn |            |
|---------------------------|------------------------|------------|--------------------------|------------|--------------------|------------|
|                           | Anzahl                 | Zeilen (%) | Anzahl                   | Zeilen (%) | Anzahl             | Zeilen (%) |
| Amras                     | 54                     | 90,0%      | 3                        | 5,0%       | 3                  | 5,0%       |
| Arzl                      | 86                     | 84,3%      | 12                       | 11,8%      | 4                  | 3,9%       |
| Hötting                   | 204                    | 84,0%      | 26                       | 10,7%      | 13                 | 5,3%       |
| Igls                      | 35                     | 100,0%     | 0                        | 0,0%       | 0                  | 0,0%       |
| Innsbruck                 | 165                    | 93,8%      | 7                        | 4,0%       | 4                  | 2,3%       |
| Mühlau                    | 41                     | 82,0%      | 5                        | 10,0%      | 4                  | 8,0%       |
| Pradl                     | 161                    | 85,6%      | 12                       | 6,4%       | 15                 | 8,0%       |
| Vill                      | 20                     | 95,2%      | 1                        | 4,8%       | 0                  | 0,0%       |
| Wiltén                    | 136                    | 87,2%      | 12                       | 7,7%       | 8                  | 5,1%       |
| weiblich                  | 481                    | 88,9%      | 36                       | 6,7%       | 24                 | 4,4%       |
| männlich                  | 421                    | 85,9%      | 42                       | 8,6%       | 27                 | 5,5%       |
| 18 bis 40 Jahre           | 380                    | 86,4%      | 41                       | 9,3%       | 19                 | 4,3%       |
| 41 bis 60 Jahre           | 282                    | 89,2%      | 18                       | 5,7%       | 16                 | 5,1%       |
| über 60 Jahre             | 240                    | 87,3%      | 19                       | 6,9%       | 16                 | 5,8%       |
| Primärer Schulabschluss   | 83                     | 84,7%      | 5                        | 5,1%       | 10                 | 10,2%      |
| Sekundärer Schulabschluss | 464                    | 85,6%      | 49                       | 9,0%       | 29                 | 5,4%       |
| Tertiärer Schulabschluss  | 352                    | 90,7%      | 24                       | 6,2%       | 12                 | 3,1%       |



## 2.6. Nutzung von Flugzeugen

80% aller befragten Innsbruckerinnen und Innsbrucker nutzen mehrmals pro Jahr oder alle paar Jahre ein Flugzeug. 1,5% sind regelmäßige Nutzerinnen und Nutzer (mehrmals pro Woche bzw. mehrmals pro Monat) und 18% nutzen niemals ein Flugzeug:

**Abbildung 47: Häufigkeit der Nutzung von Flugzeugen in Prozent**

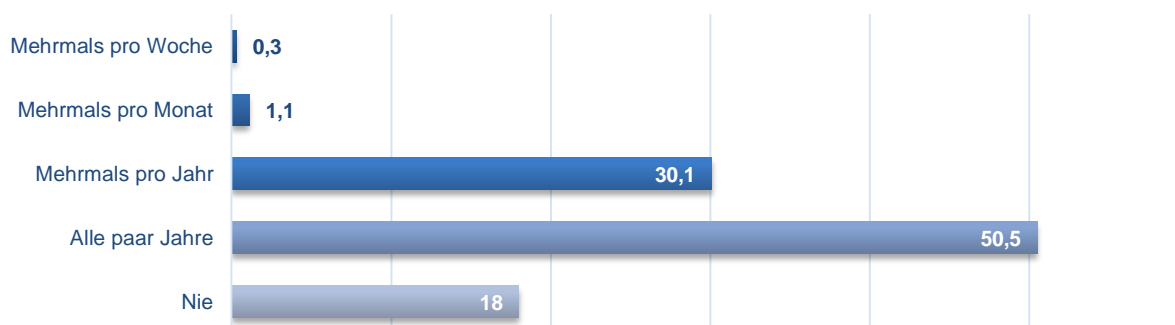

Die Frage nach der Häufigkeit der Nutzung von Flugzeugen unterscheidet sich in den Antwortkategorien – wie auch bei anderen vergleichbaren Studien üblich – von den Fragen zu den anderen Verkehrsmitteln. Dies deshalb, da eine tägliche Nutzung eines Flugzeuges, abgesehen von Flugpersonal, nahezu ausgeschlossen ist.

Die Antwortkategorie *Mehrmals pro Jahr* umfasst hingegen zum Beispiel einen einmal im Jahr stattfindenden Urlaub, der mit dem Flugzeug als Transportmittel erreicht wird und bei dem im Regelfall zumindest zwei Flüge – ein Hin- und ein Rückflug – absolviert werden.<sup>7</sup>

**Tabelle 44: Häufigkeit der Nutzung eines Flugzeuges gruppiert**

|        | Häufigkeit            | Gültige Prozente | Kumulierte Prozente |
|--------|-----------------------|------------------|---------------------|
| Gültig | Starke Nutzung        | 14               | 1,4                 |
|        | Gelegentliche Nutzung | 310              | 31,4                |
|        | Geringe Nutzung       | 707              | 68,6                |
|        | Gesamt                | 1031             | 100,0               |

In den Analysen zeigen sich im Mittelwertvergleich ebenso wie in den (gruppierten) bi- und multivariaten Auswertungen nur geringfügige Unterschiede zwischen den Geschlechtern, zwischen Familien mit und ohne minderjährigen Kindern im selben Haushalt und anderen Variablen.

Deutlich treten die Unterschiede im Nutzungsverhalten von Flugzeugen nach Alter und höchstem erreichten Schulabschluss hervor: Die Häufigkeit der Nutzung von Flugzeugen steigt mit zunehmendem Bildungsgrad und sinkt mit dem Alter:

<sup>7</sup> Das Item und die Antwortkategorien wurden im Vorfeld erfolgreich getestet und mit anderen, vergleichbaren Studien abgeglichen. In der Durchführung kam es zu keinerlei Schwierigkeiten, Unverständnis oder Nachfragen durch Probandinnen und Probanden. In einem Fall trat jedoch eine Diskrepanz mit einer befragten Person auf, die anmerkte, dass die Antwortkategorie *Einmal im Jahr* als in diesem Fall angebrachte Antwortkategorie fehle. Da sich diese befragte Person nicht auf die vorgegebenen Antwortkategorien *Mehrmals pro Jahr* oder *Alle paar Jahre* festlegen konnte, wurde der gesamte Fragebogen dieser befragten Person aus dem Datensatz entfernt.

**Tabelle 45: Nutzung eines Flugzeugs und ausgewählte Variablen (gruppiert)**

|                           | Starke Nutzung (*) |            | Gelegentliche Nutzung |            | Geringe Nutzung |            |
|---------------------------|--------------------|------------|-----------------------|------------|-----------------|------------|
|                           | Anzahl             | Zeilen (%) | Anzahl                | Zeilen (%) | Anzahl          | Zeilen (%) |
| Amras                     | 1                  | 1,7%       | 6                     | 10,0%      | 53              | 88,3%      |
| Arzl                      | 1                  | 1,0%       | 28                    | 27,5%      | 73              | 71,6%      |
| Hötting                   | 4                  | 1,6%       | 81                    | 33,3%      | 158             | 65,0%      |
| Igls                      | 0                  | 0,0%       | 12                    | 34,3%      | 23              | 65,7%      |
| Innsbruck                 | 3                  | 1,7%       | 56                    | 31,8%      | 117             | 66,5%      |
| Mühlau                    | 1                  | 2,0%       | 21                    | 42,0%      | 28              | 56,0%      |
| Pradl                     | 1                  | 0,5%       | 54                    | 28,7%      | 133             | 70,7%      |
| Vill                      | 0                  | 0,0%       | 6                     | 28,6%      | 15              | 71,4%      |
| Wilten                    | 3                  | 1,9%       | 46                    | 29,5%      | 107             | 68,6%      |
| weiblich                  | 5                  | 0,9%       | 156                   | 28,8%      | 380             | 70,2%      |
| männlich                  | 9                  | 1,8%       | 154                   | 31,4%      | 327             | 66,7%      |
| 18 bis 40 Jahre           | 4                  | 0,9%       | 164                   | 37,3%      | 272             | 61,8%      |
| 41 bis 60 Jahre           | 8                  | 2,5%       | 87                    | 27,5%      | 221             | 69,9%      |
| über 60 Jahre             | 2                  | 0,7%       | 59                    | 21,5%      | 214             | 77,8%      |
| Primärer Schulabschluss   | 0                  | 0,0%       | 12                    | 12,2%      | 86              | 87,8%      |
| Sekundärer Schulabschluss | 5                  | 0,9%       | 132                   | 24,4%      | 405             | 74,7%      |
| Tertiärer Schulabschluss  | 9                  | 2,3%       | 165                   | 42,5%      | 214             | 55,2%      |

(\*) Aufgrund der kleinen Fallzahlen sind valide Aussagen zur Gruppe mit „Starker Nutzung“ nur sehr eingeschränkt sinnvoll.

# Lebensbedingungen in Innsbruck

## 1. Überblick Lebensbedingungen in Innsbruck

Mittels 8 Fragen und einer 11-teiligen Skala von 0 (*gar nicht gut*) bis 10 (*außerordentlich gut*) wurde die Güte der Wohn- und Lebensbedingungen in der Landeshauptstadt Innsbruck abgefragt.

Die Güte der Lebensbedingungen wird in allen Teilbereichen überwiegend sehr hoch eingeschätzt. Der Mittelwert aller Antworten über alle 8 Fragen hinweg (ohne jene vereinzelt Personen, die zu einzelnen Fragen keine Angaben machen konnten/wollten) liegt bei 6,8 (74,7%):

**Abbildung 48: Mittelwertvergleich der Lebensbedingungen**

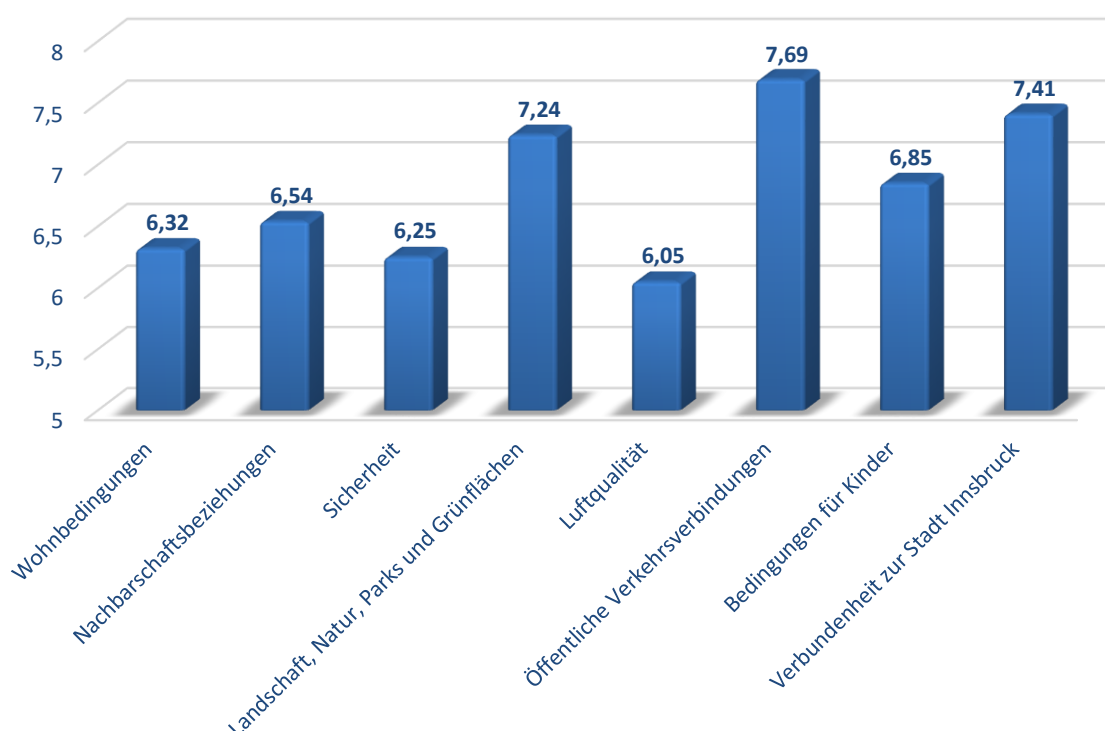

Am höchsten werden die öffentlichen Verkehrsmittel, die eigene Verbundenheit zur Stadt Innsbruck und die Frage nach der Güte von Landschaft, Natur, öffentlichen Parks und Grünflächen beurteilt. Vergleichsweise deutlich niedriger die Wohnbedingungen, die Sicherheit und die Luftqualität. Die Nachbarschaftsbeziehungen und die Bedingungen für das Aufwachsen von Kindern liegen dazwischen.

## 2. Wohnbedingungen in Innsbruck

Knapp 38% aller Befragten beurteilen die Wohnbedingungen in Innsbruck in den drei höchsten Antwortkategorien und somit als sehr gut, 8,1% in den drei Untersten und damit als schlecht. Rund 54% der Antworten verteilen sich auf die fünf mittleren Kategorien. 2 Probandinnen und Probanden geben auf die Frage nach der Güte der Wohnbedingungen in Innsbruck keine Antwort:

**Abbildung 49: Beurteilung der Wohnbedingungen in Prozent**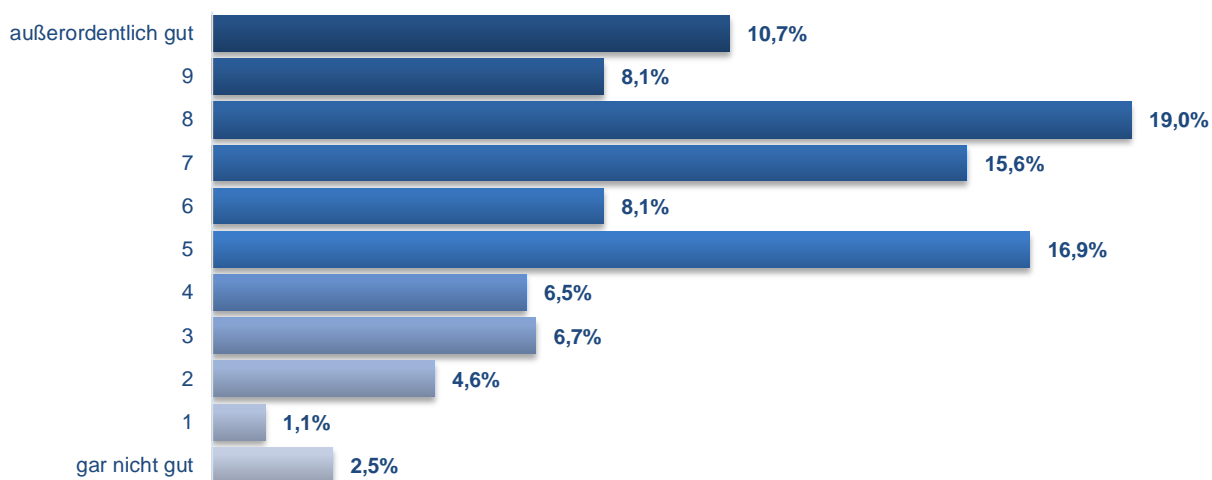**Tabelle 46: Beurteilung der Wohnbedingungen gruppiert**

|        |                  | Häufigkeit | Gültige Prozente | Kumulierte Prozente |
|--------|------------------|------------|------------------|---------------------|
|        | Nicht gut        | 84         | 8,1              | 8,1                 |
|        | Durchschnittlich | 555        | 53,8             | 62,0                |
| Gültig | Sehr gut         | 390        | 37,8             | 99,8                |
|        | w.n. / k.A.      | 2          | ,2               | 100,0               |
|        | Gesamt           | 1031       | 100,0            |                     |

### 3. Nachbarschaftsbeziehungen in Innsbruck

Rund 40% aller Befragten beurteilen die Nachbarschaftsbeziehungen in Innsbruck als sehr gut (in den drei höchsten Antwortkategorien), 6,6% als schlecht (in den drei Untersten):

**Abbildung 50: Beurteilung der Nachbarschaftsbeziehungen in Prozent**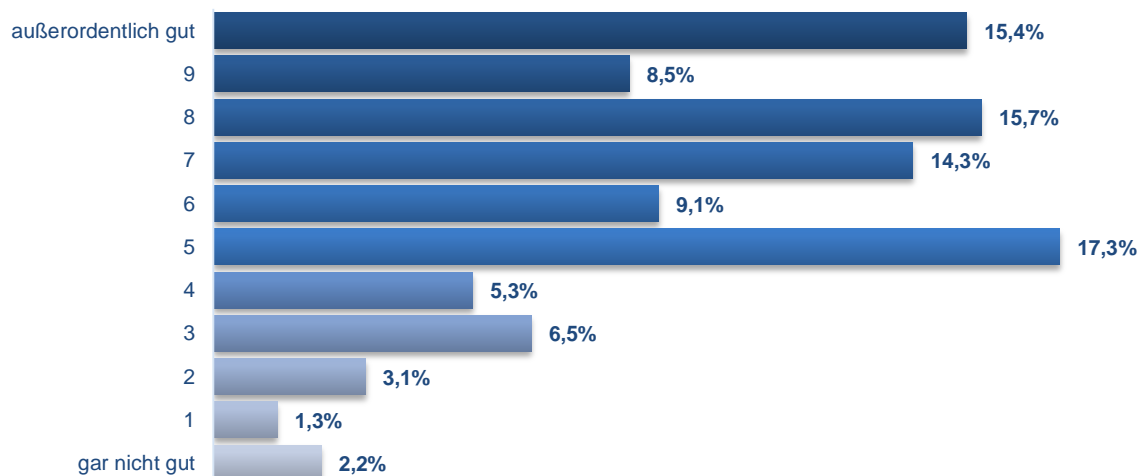

52,5% der Antworten verteilen sich auf die fünf mittleren Kategorien. 13 Probandinnen und Probanden geben auf die Frage nach der Güte der Nachbarschaftsbeziehungen in Innsbruck keine Antwort:

**Tabelle 47: Beurteilung der Nachbarschaftsbeziehungen gruppiert**

|        |                  | Häufigkeit | Gültige Prozente | Kumulierte Prozente |
|--------|------------------|------------|------------------|---------------------|
|        | Nicht gut        | 68         | 6,6              | 6,6                 |
|        | Durchschnittlich | 541        | 52,5             | 59,1                |
| Gültig | Sehr gut         | 409        | 39,7             | 98,7                |
|        | w.n. / k.A.      | 13         | 1,3              | 100,0               |
|        | Gesamt           | 1031       | 100,0            |                     |

## 4. Sicherheit in Innsbruck

38% aller befragten Innsbruckerinnen und Innsbrucker beurteilen die Sicherheit in Innsbruck in den drei höchsten Antwortkategorien und somit als sehr gut, 10,6% in den drei Untersten und damit als schlecht. Etwas mehr als die Hälfte der Antworten verteilen sich auf die fünf mittleren Kategorien. Eine Probandin bzw. ein Proband gibt auf die Frage nach der Güte der Sicherheit in Innsbruck keine Antwort:

**Abbildung 51: Beurteilung der Sicherheit in Prozent**

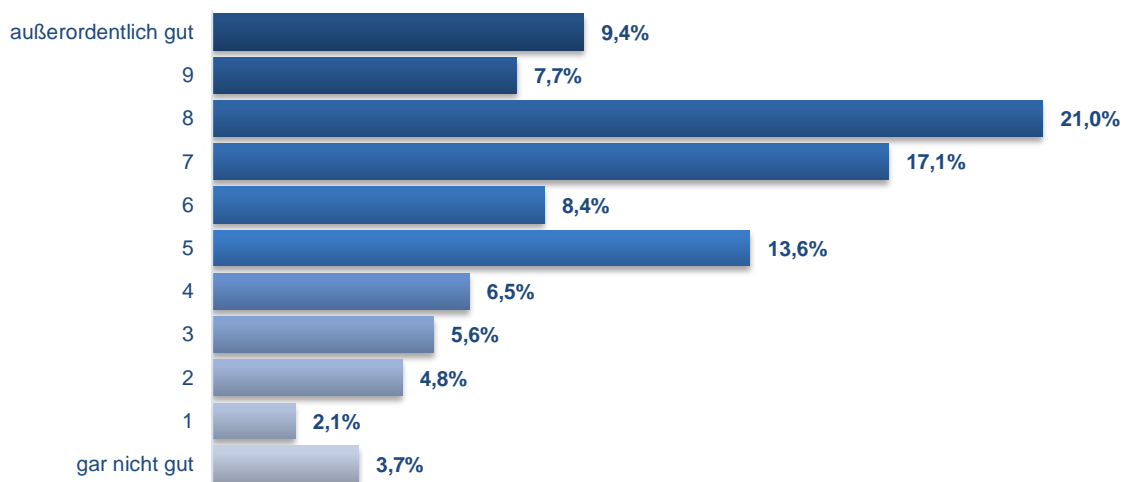

**Tabelle 48: Beurteilung der Sicherheit gruppiert**

|        |                  | Häufigkeit | Gültige Prozente | Kumulierte Prozente |
|--------|------------------|------------|------------------|---------------------|
|        | Nicht gut        | 109        | 10,6             | 10,6                |
|        | Durchschnittlich | 528        | 51,2             | 61,8                |
| Gültig | Sehr gut         | 393        | 38,1             | 99,9                |
|        | w.n. / k.A.      | 1          | ,1               | 100,0               |
|        | Gesamt           | 1031       | 100,0            |                     |

## 5. Landschaft, Natur, Parks und Grünflächen in Innsbruck

Knapp 5% aller Befragten beurteilen die Landschaft und Natur, die öffentlichen Parks und Grünflächen in Innsbruck in den drei untersten Antwortkategorien und damit als schlecht, über 55% in den drei Höchsten und somit als sehr gut. Etwas weniger als 40% der Antworten verteilen sich auf die fünf mittleren Kategorien:

**Abbildung 52: Beurteilung von Landschaft, Natur, Parks und Grünflächen in Prozent**

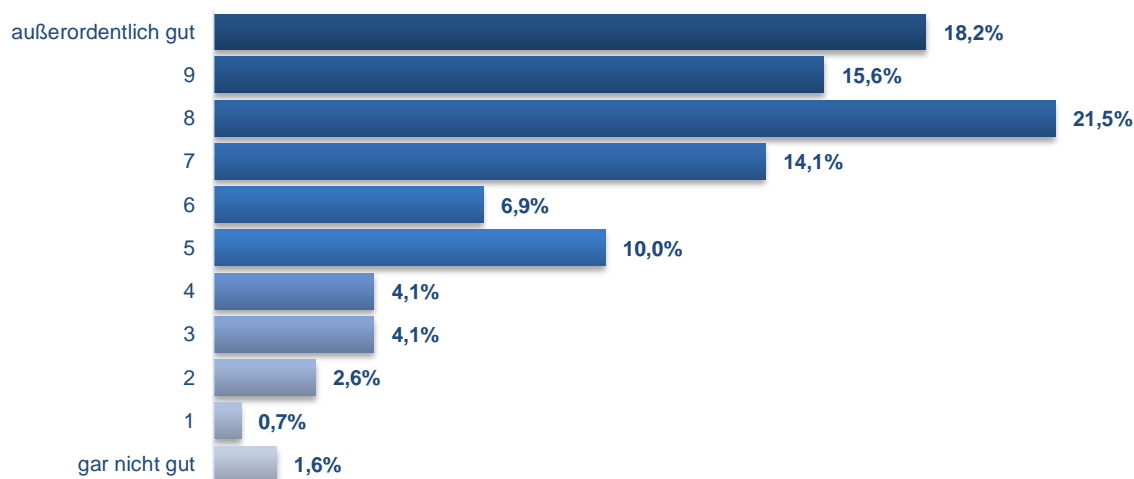

6 Probandinnen und Probanden geben auf die Frage nach der Landschaft und Natur, den öffentlichen Parks und Grünflächen in Innsbruck keine Antwort:

**Tabelle 49: Beurteilung der Landschaft, Natur, Parks und Grünflächen gruppiert**

|                  | Häufigkeit | Gültige Prozente | Kumulierte Prozente |
|------------------|------------|------------------|---------------------|
| Nicht gut        | 51         | 4,9              | 4,9                 |
| Durchschnittlich | 403        | 39,1             | 44,0                |
| Gültig           |            |                  |                     |
| Sehr gut         | 571        | 55,4             | 99,4                |
| w.n. / k.A.      | 6          | ,6               | 100,0               |
| Gesamt           | 1031       | 100,0            |                     |

## 6. Luftqualität in Innsbruck

Rund 58% der Antworten zur Luftqualität in Innsbruck verteilen sich auf die fünf mittleren Kategorien. Etwas mehr als 33% aller Befragten beurteilen die Luftqualität in den drei höchsten Antwortkategorien und somit als sehr gut, 8,2% in den drei Untersten und damit als schlecht. 1 Probandin / Proband gibt auf die Frage nach der Güte der Luftqualität in Innsbruck keine Antwort:

**Abbildung 53: Beurteilung der Luftqualität in Prozent**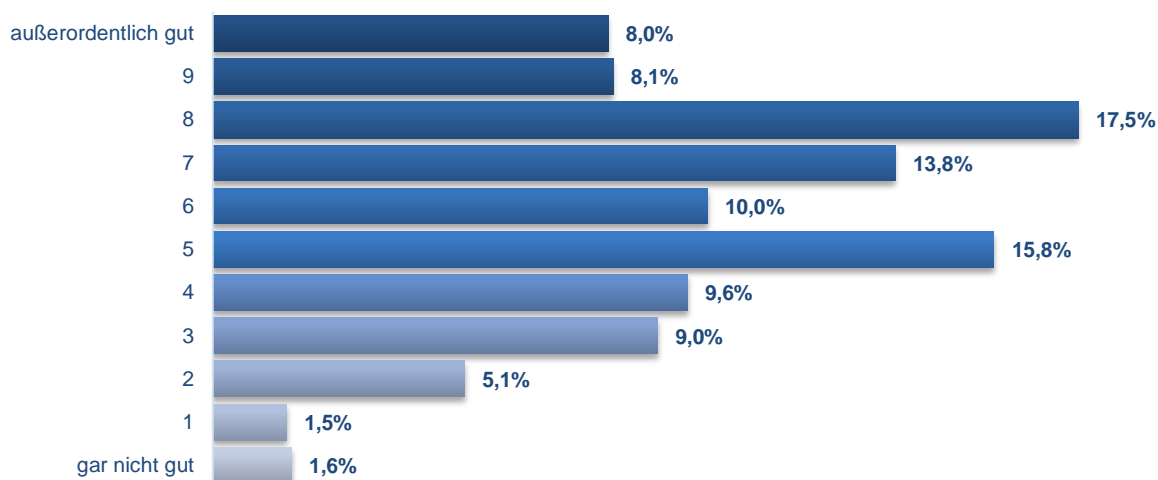**Tabelle 50: Beurteilung der Luftqualität gruppiert**

|        |                  | Häufigkeit | Gültige Prozente | Kumulierte Prozente |
|--------|------------------|------------|------------------|---------------------|
|        | Nicht gut        | 85         | 8,2              | 8,2                 |
|        | Durchschnittlich | 600        | 58,2             | 66,4                |
| Gültig | Sehr gut         | 345        | 33,5             | 99,9                |
|        | w.n. / k.A.      | 1          | ,1               | 100,0               |
|        | Gesamt           | 1031       | 100,0            |                     |

## 7. Öffentliche Verkehrsmittel in Innsbruck

Fast 64% aller Befragten beurteilen die öffentlichen Verkehrsmittel in Innsbruck in den drei höchsten Antwortkategorien und somit als sehr gut, 2,6% in den drei Untersten und damit als schlecht:

**Abbildung 54: Beurteilung der öffentlichen Verkehrsmittel in Prozent**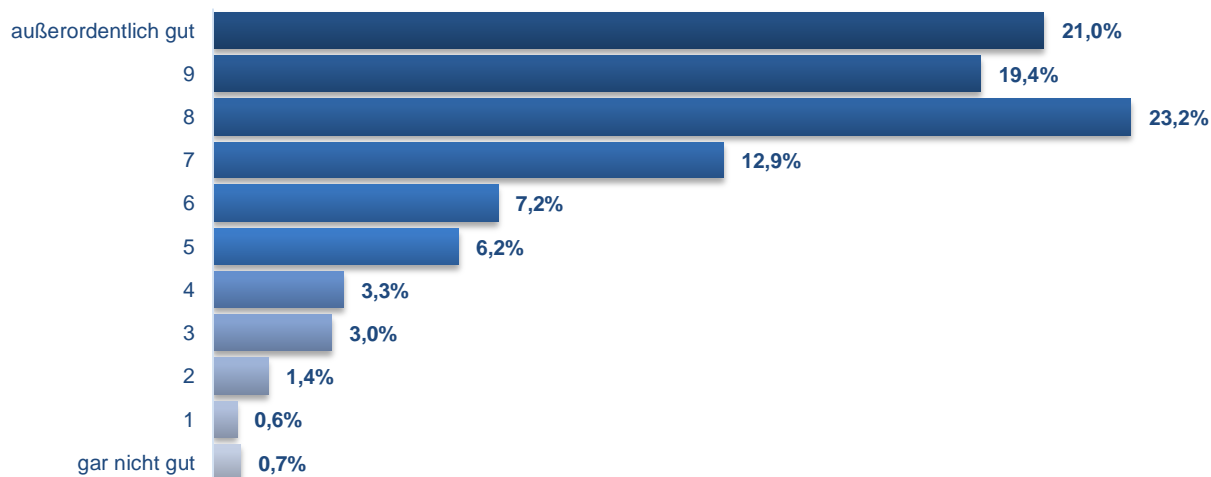

Weniger als ein Drittel der Antworten verteilen sich auf die fünf mittleren Kategorien. 12 Probandinnen und Probanden geben auf die Frage nach der Güte der öffentlichen Verkehrsmittel keine Antwort:

**Tabelle 51: Beurteilung der öffentlichen Verkehrsverbindungen gruppiert**

|        |                  | Häufigkeit | Gültige Prozente | Kumulierte Prozente |
|--------|------------------|------------|------------------|---------------------|
|        | Nicht gut        | 27         | 2,6              | 2,6                 |
|        | Durchschnittlich | 336        | 32,6             | 35,2                |
| Gültig | Sehr gut         | 656        | 63,6             | 98,8                |
|        | w.n. / k.A.      | 12         | 1,2              | 100,0               |
|        | Gesamt           | 1031       | 100,0            |                     |

## 8. Bedingungen für das Aufwachsen von Kinder in Innsbruck

50% der Antworten zu den Bedingungen für das Aufwachsen von Kinder in Innsbruck entfallen auf die fünf mittleren Kategorien. Etwas mehr als 43% aller Befragten beurteilen diese in den drei höchsten Antwortkategorien und somit als sehr gut, 4,6% in den drei Untersten und damit als schlecht. 22 Probandinnen und Probanden geben auf die Frage nach der Güte der Bedingungen für das Aufwachsen von Kinder in Innsbruck keine Antwort:

**Abbildung 55: Beurteilung der Bedingungen für das Aufwachsen von Kinder in Prozent**

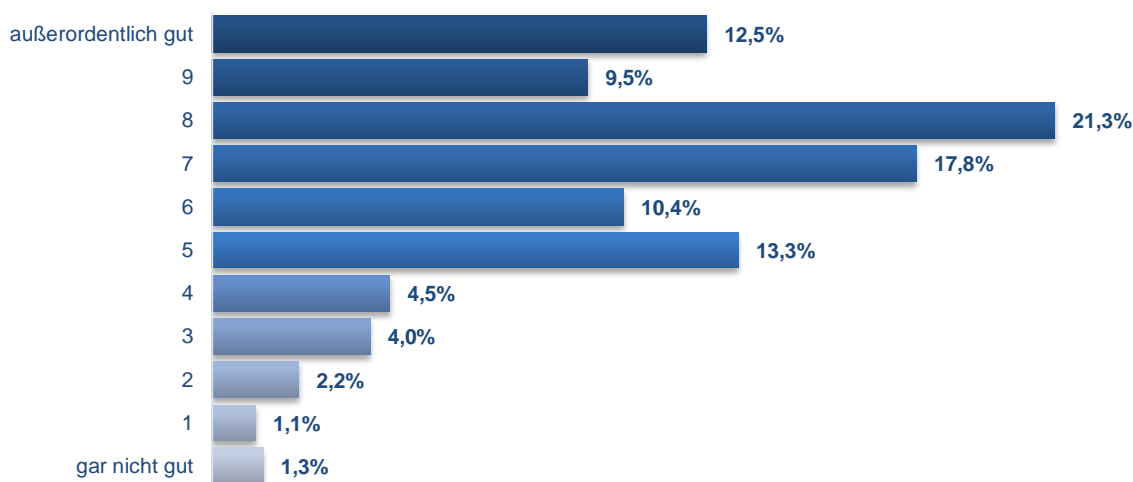

**Tabelle 52: Beurteilung der Bedingungen für das Aufwachsen von Kinder gruppiert**

|        |                  | Häufigkeit | Gültige Prozente | Kumulierte Prozente |
|--------|------------------|------------|------------------|---------------------|
|        | Nicht gut        | 47         | 4,6              | 4,6                 |
|        | Durchschnittlich | 515        | 50,0             | 54,5                |
| Gültig | Sehr gut         | 447        | 43,4             | 97,9                |
|        | w.n. / k.A.      | 22         | 2,1              | 100,0               |
|        | Gesamt           | 1031       | 100,0            |                     |



## 9. Verbundenheit zur Stadt Innsbruck

Knapp 58% aller Befragten fühlen sich der Stadt Innsbruck sehr verbunden und antworten in den drei höchsten Antwortkategorien, 5,3% sehen sich der Stadt Innsbruck nicht verbunden und antworten in den drei untersten Kategorien. Etwas mehr als ein Drittel der Antworten verteilt sich auf die fünf mittleren Kategorien. 2 Probandinnen und Probanden geben auf die Frage nach der Verbundenheit zur Stadt Innsbruck keine Antwort:

**Abbildung 56: Beurteilung der Verbundenheit zur Stadt Innsbruck in Prozent**

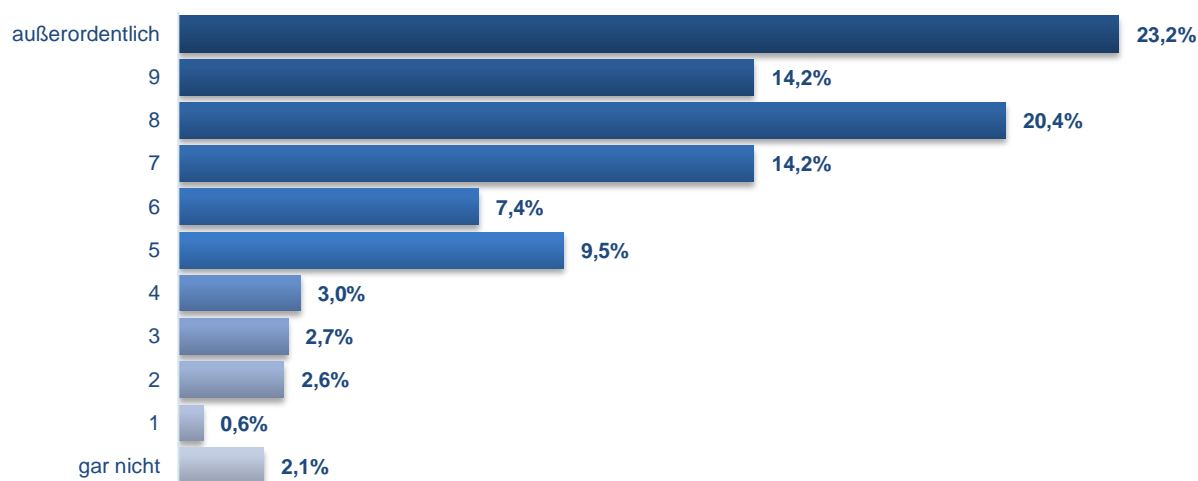

**Tabelle 53: Beurteilung der Verbundenheit zur Stadt Innsbruck gruppiert**

|                  | Häufigkeit | Gültige Prozente | Kumulierte Prozente |
|------------------|------------|------------------|---------------------|
| Nicht verbunden  | 55         | 5,3              | 5,3                 |
| Durchschnittlich | 379        | 36,8             | 42,1                |
| Gültig           |            |                  |                     |
| Sehr verbunden   | 595        | 57,7             | 99,8                |
| w.n. / k.A.      | 2          | ,2               | 100,0               |
| Gesamt           | 1031       | 100,0            |                     |

## 10. Lebensbedingungen und ausgewählte Parameter

Im Folgenden werden eine Reihe von ausgewählten Überblicksauswertungen (verkürzt und zur Veranschaulichung größtenteils über gruppierte Mittelwertvergleiche) dargestellt. Die Antwortkategorien *weiß nicht / keine Angabe* wurden im Sinne einer besseren Übersichtlichkeit ausgeklammert.

### 10.1. Lebensbedingungen in Innsbruck und Katastralgemeinde

Die Beurteilung der Lebens- und Wohnbedingungen unterscheidet sich ausgeprägt zwischen den einzelnen Katastralgemeinden von Innsbruck. Im Summenscore über alle 8 Fragen hinweg, schätzen die Befragten in Mühlau die Wohn- und Lebensbedingungen am höchsten und die befragten Einwohn-

nerinnen und Einwohner von Amras am niedrigsten ein. Insgesamt kann festgestellt werden, dass die Befragten in den äußeren Katastralgemeinden die Lebensbedingungen in Innsbruck höher einschätzen, als diejenigen in den innerstädtischen Gemeinden:

**Abbildung 57: Summenscore Lebensbedingungen und Katastralgemeinde im Mittelwertvergleich (aufsteigend sortiert)**

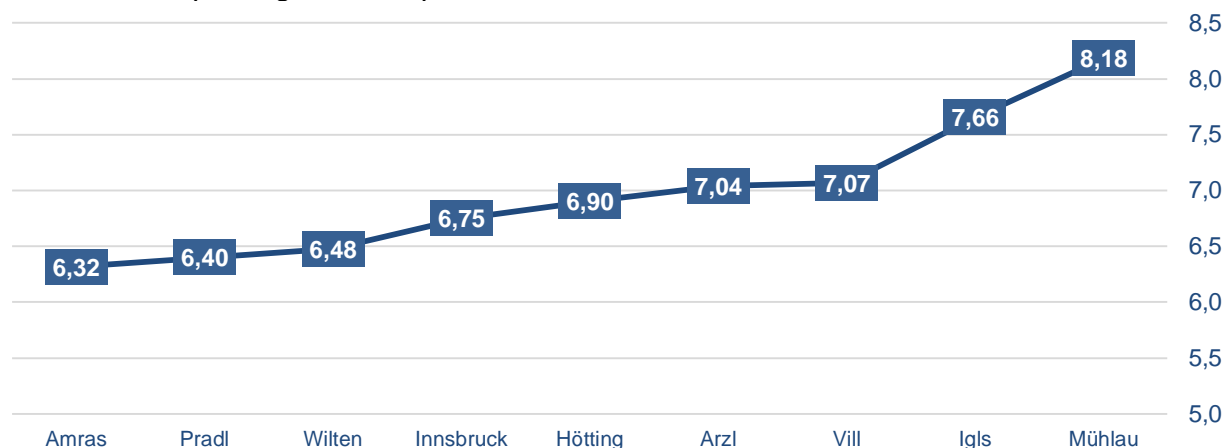

**Tabelle 54: Lebensbedingungen und Katastralgemeinde im Mittelwertvergleich**

| Katastralgemeinde |                    | Wohnbedin-<br>gungen | Nachbar-<br>schafts-<br>beziehungen | Sicher-<br>heit | Land-<br>schaft<br>und Natur | Luft-<br>qualität | Öffentl.<br>Verkehr | Bedingun-<br>gen für<br>Kinder | Verbun-<br>denheit zu<br>Innsbruck |
|-------------------|--------------------|----------------------|-------------------------------------|-----------------|------------------------------|-------------------|---------------------|--------------------------------|------------------------------------|
|                   | <b>Mittelwert</b>  | <b>5,58</b>          | <b>5,95</b>                         | <b>5,38</b>     | <b>6,68</b>                  | <b>5,42</b>       | <b>8,02</b>         | <b>6,56</b>                    | <b>6,95</b>                        |
| <b>Amras</b>      | N                  | 60                   | 57                                  | 60              | 59                           | 60                | 60                  | 57                             | 58                                 |
|                   | Standardabweichung | 2,417                | 2,621                               | 2,532           | 2,825                        | 2,280             | 2,021               | 2,276                          | 2,837                              |
|                   | <b>Mittelwert</b>  | <b>6,45</b>          | <b>7,49</b>                         | <b>6,05</b>     | <b>7,60</b>                  | <b>6,37</b>       | <b>7,58</b>         | <b>7,40</b>                    | <b>7,40</b>                        |
| <b>Arzl</b>       | N                  | 102                  | 102                                 | 102             | 102                          | 102               | 102                 | 102                            | 102                                |
|                   | Standardabweichung | 2,362                | 2,354                               | 2,682           | 2,112                        | 2,320             | 2,231               | 2,050                          | 2,326                              |
|                   | <b>Mittelwert</b>  | <b>6,47</b>          | <b>6,77</b>                         | <b>6,67</b>     | <b>7,32</b>                  | <b>5,98</b>       | <b>7,32</b>         | <b>7,16</b>                    | <b>7,53</b>                        |
| <b>Hötting</b>    | N                  | 241                  | 234                                 | 242             | 238                          | 243               | 240                 | 230                            | 243                                |
|                   | Standardabweichung | 2,477                | 2,567                               | 2,201           | 2,143                        | 2,290             | 2,264               | 1,988                          | 2,355                              |
|                   | <b>Mittelwert</b>  | <b>7,37</b>          | <b>7,31</b>                         | <b>6,80</b>     | <b>8,40</b>                  | <b>7,83</b>       | <b>9,31</b>         | <b>7,34</b>                    | <b>6,89</b>                        |
| <b>Igls</b>       | N                  | 35                   | 35                                  | 35              | 35                           | 35                | 35                  | 35                             | 35                                 |
|                   | Standardabweichung | 1,437                | 1,207                               | 1,389           | 1,265                        | 1,150             | ,796                | 1,514                          | 1,728                              |
|                   | <b>Mittelwert</b>  | <b>6,12</b>          | <b>6,14</b>                         | <b>6,07</b>     | <b>7,57</b>                  | <b>6,10</b>       | <b>7,59</b>         | <b>6,76</b>                    | <b>7,65</b>                        |
| <b>Innsbruck</b>  | N                  | 176                  | 176                                 | 176             | 176                          | 175               | 175                 | 173                            | 176                                |
|                   | Standardabweichung | 2,472                | 2,432                               | 2,375           | 2,307                        | 2,503             | 2,115               | 2,264                          | 2,320                              |
|                   | <b>Mittelwert</b>  | <b>8,82</b>          | <b>7,68</b>                         | <b>8,52</b>     | <b>9,08</b>                  | <b>7,72</b>       | <b>7,34</b>         | <b>9,00</b>                    | <b>7,30</b>                        |
| <b>Mühlau</b>     | N                  | 50                   | 50                                  | 50              | 50                           | 50                | 50                  | 50                             | 50                                 |
|                   | Standardabweichung | 1,574                | 2,226                               | 1,741           | 1,523                        | 2,176             | 2,076               | 1,512                          | 2,757                              |
|                   | <b>Mittelwert</b>  | <b>5,88</b>          | <b>6,10</b>                         | <b>5,30</b>     | <b>6,65</b>                  | <b>6,08</b>       | <b>7,88</b>         | <b>5,91</b>                    | <b>7,40</b>                        |
| <b>Pradl</b>      | N                  | 188                  | 188                                 | 188             | 188                          | 188               | 188                 | 188                            | 188                                |
|                   | Standardabweichung | 2,552                | 2,517                               | 3,111           | 2,647                        | 2,535             | 2,111               | 2,496                          | 2,507                              |

|                  |                    |             |             |             |             |             |             |             |             |
|------------------|--------------------|-------------|-------------|-------------|-------------|-------------|-------------|-------------|-------------|
|                  | <b>Mittelwert</b>  | <b>5,95</b> | <b>7,67</b> | <b>7,00</b> | <b>7,05</b> | <b>5,76</b> | <b>8,19</b> | <b>7,67</b> | <b>7,24</b> |
| <b>Vill</b>      | N                  | 21          | 21          | 21          | 21          | 21          | 21          | 21          | 21          |
|                  | Standardabweichung | 2,692       | 2,309       | 1,924       | 2,224       | 3,097       | 1,662       | 1,798       | 2,322       |
|                  | <b>Mittelwert</b>  | <b>6,06</b> | <b>6,09</b> | <b>6,42</b> | <b>6,57</b> | <b>5,19</b> | <b>7,78</b> | <b>6,44</b> | <b>7,28</b> |
| <b>Wilten</b>    | N                  | 156         | 155         | 156         | 156         | 156         | 148         | 153         | 156         |
|                  | Standardabweichung | 2,450       | 2,632       | 2,499       | 2,383       | 2,364       | 1,883       | 2,083       | 2,346       |
|                  | <b>Mittelwert</b>  | <b>6,32</b> | <b>6,54</b> | <b>6,25</b> | <b>7,24</b> | <b>6,05</b> | <b>7,69</b> | <b>6,85</b> | <b>7,41</b> |
| <b>Insgesamt</b> | N                  | 1029        | 1018        | 1030        | 1025        | 1030        | 1019        | 1009        | 1029        |
|                  | Standardabweichung | 2,491       | 2,528       | 2,585       | 2,379       | 2,445       | 2,112       | 2,246       | 2,404       |

## 10.2. Lebensbedingungen in Innsbruck und Geschlecht

Frauen beurteilen die Nachbarschaftsbeziehungen in Innsbruck besser, die Wohnbedingungen und die Sicherheit schlechter als Männer und vice versa. Die Beurteilung der Lebensbedingungen in Innsbruck zeigt bei den meisten der anderen Einzelfragen nur vergleichsweise geringe Abweichungen zwischen den Geschlechtern:

**Tabelle 55: Lebensbedingungen und Geschlecht im Mittelwertvergleich**

| Geschlecht       |                    | Wohnbe-<br>dingungen | Nachbar-<br>schafts-<br>beziehungen | Sicher-<br>heit | Landschaft<br>und Natur | Luft-<br>qualität | Öffentl.<br>Verkehr | Bedingun-<br>gen für<br>Kinder | Verbun-<br>denheit zu<br>Innsbruck |
|------------------|--------------------|----------------------|-------------------------------------|-----------------|-------------------------|-------------------|---------------------|--------------------------------|------------------------------------|
|                  | <b>Mittelwert</b>  | <b>6,17</b>          | <b>6,69</b>                         | <b>6,10</b>     | <b>7,18</b>             | <b>6,01</b>       | <b>7,78</b>         | <b>6,82</b>                    | <b>7,48</b>                        |
| <b>weiblich</b>  | N                  | 539                  | 536                                 | 541             | 540                     | 541               | 534                 | 532                            | 541                                |
|                  | Standardabweichung | 2,531                | 2,613                               | 2,580           | 2,469                   | 2,428             | 2,131               | 2,292                          | 2,361                              |
|                  | <b>Mittelwert</b>  | <b>6,49</b>          | <b>6,38</b>                         | <b>6,41</b>     | <b>7,30</b>             | <b>6,10</b>       | <b>7,59</b>         | <b>6,88</b>                    | <b>7,33</b>                        |
| <b>männlich</b>  | N                  | 490                  | 482                                 | 489             | 485                     | 489               | 485                 | 477                            | 488                                |
|                  | Standardabweichung | 2,438                | 2,422                               | 2,584           | 2,275                   | 2,465             | 2,089               | 2,194                          | 2,451                              |
|                  | <b>Mittelwert</b>  | <b>6,32</b>          | <b>6,54</b>                         | <b>6,25</b>     | <b>7,24</b>             | <b>6,05</b>       | <b>7,69</b>         | <b>6,85</b>                    | <b>7,41</b>                        |
| <b>Insgesamt</b> | N                  | 1029                 | 1018                                | 1030            | 1025                    | 1030              | 1019                | 1009                           | 1029                               |
|                  | Standardabweichung | 2,491                | 2,528                               | 2,585           | 2,379                   | 2,445             | 2,112               | 2,246                          | 2,404                              |

## 10.3. Lebensbedingungen in Innsbruck und Alter

Je älter die Befragten, desto besser werden die Nachbarschaftsbeziehungen eingeschätzt und desto größer die eigene Verbundenheit zur Stadt Innsbruck. Jüngere Befragte (Gruppe der 18 bis 40-Jährigen) schätzen hingegen die Sicherheit und die Luftqualität in der Stadt Innsbruck deutlich höher ein als die beiden älteren Altersgruppen:

**Abbildung 58: Lebensbedingungen und Alter (gruppiert) im Mittelwertvergleich**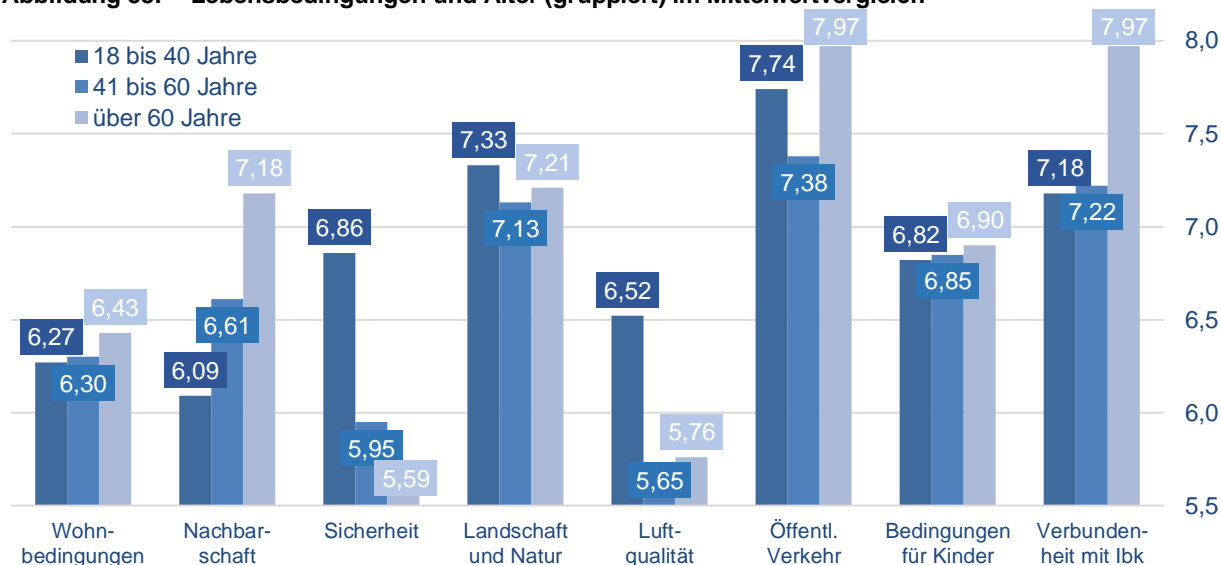

#### 10.4. Lebensbedingungen in Innsbruck und Bildung

Befragte mit Pflichtschulabschluss schätzen die Nachbarschaftsbeziehungen, die Luftqualität und die Güte des öffentlichen Verkehrsnetzes in Innsbruck höher ein als die Befragten der sekundären und tertiären Bildungsschicht:<sup>8</sup>

**Abbildung 59: Lebensbedingungen und höchster Schulabschluss (gruppiert) im Mittelwertvergleich**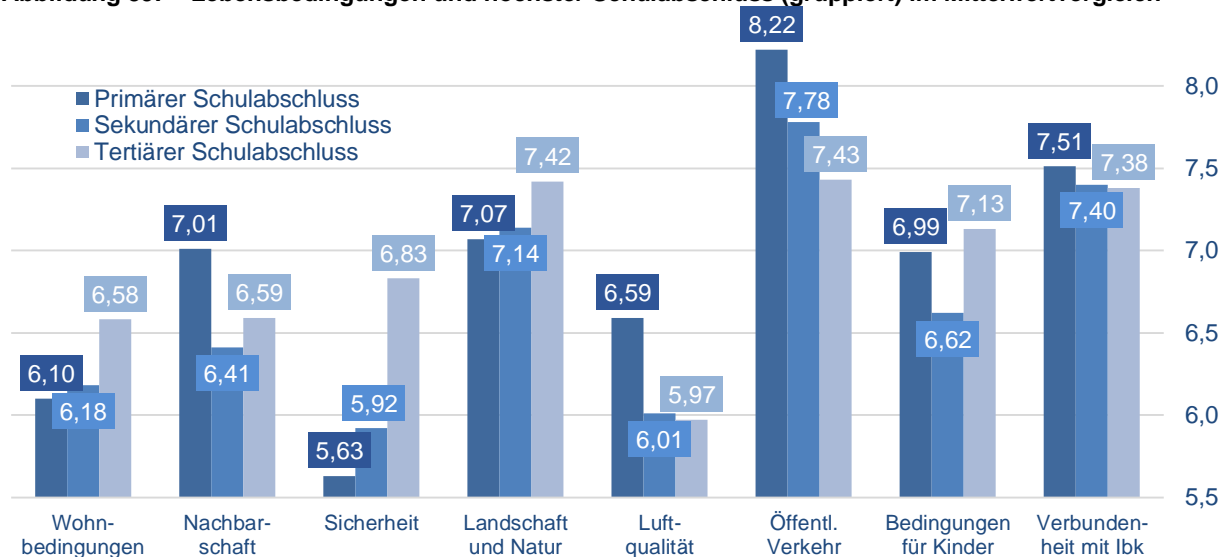

Insgesamt zeigt die mittlere Bildungsschicht im Summenscore die niedrigsten Einschätzungen der Güte der Lebensbedingungen in Innsbruck.

<sup>8</sup> Anm.: Altersbereinigt relativieren sich diese Ausprägungen, bleiben jedoch erhalten.

## 10.5. Lebensbedingungen in Innsbruck und Gesundheitszustand

Befragte, die ihren Gesundheitszustand als nicht gut beschreiben, schätzen die Lebensbedingungen in Innsbruck – mit Ausnahme der Nachbarschaftsbeziehungen, der Verbundenheit zur Stadt Innsbruck und der Güte des öffentlichen Verkehrs – merklich schlechter ein, als Personen mit zufriedenstellendem oder sehr gutem Gesundheitszustand:

**Abbildung 60: Lebensbedingungen und Gesundheitszustand (gruppiert) im Mittelwertvergleich**

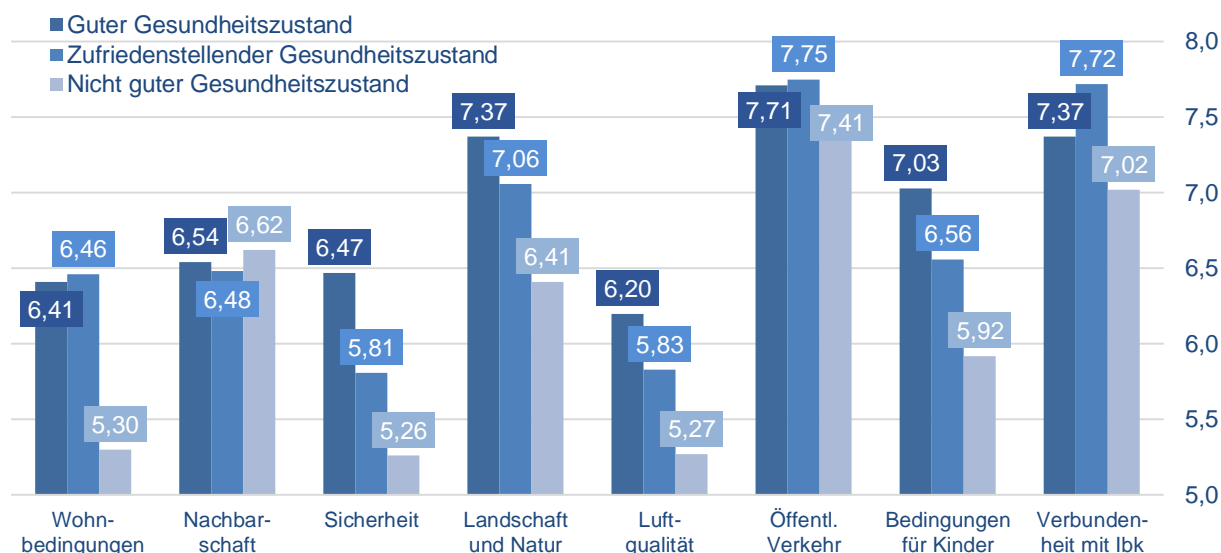

Im Mittel beträgt der Unterschied zu denjenigen Befragten, die von einem sehr guten eigenen Gesundheitszustand ausgehen mehr als eine Antwortkategorie (von insgesamt 11).

## 10.6. Lebensbedingungen in Innsbruck und Lärmempfindlichkeit

Je stärker eine Person sich selbst als lärmempfindlich einstuft, desto geringer bewertet sie über alle Fragen hinweg die Güte der Lebensbedingungen in Innsbruck – mit 2 Ausnahmen: Die Verbundenheit zur Stadt Innsbruck und die Güte des öffentlichen Verkehrs stehen in keinem deutlichen Zusammenhang zur Lärmempfindlichkeit und werden nicht signifikant niedriger bewertet als bei den durchschnittlich bzw. nicht lärmempfindlichen Befragten:

**Tabelle 56: Lebensbedingungen und Lärmempfindlichkeit im Mittelwertvergleich**

| Lärmempfindlichkeit (gruppiert)         |                    | Wohnbedingungen | Nachbarschaftsbeziehungen | Sicherheit  | Landschaft und Natur | Luftqualität | Öffentl. Verkehr | Bedingungen für Kinder | Verbundenheit zu Innsbruck |
|-----------------------------------------|--------------------|-----------------|---------------------------|-------------|----------------------|--------------|------------------|------------------------|----------------------------|
| <b>Nicht lärmempfindlich</b>            | <b>Mittelwert</b>  | <b>6,60</b>     | <b>6,82</b>               | <b>6,42</b> | <b>7,34</b>          | <b>6,69</b>  | <b>8,03</b>      | <b>7,14</b>            | <b>7,67</b>                |
|                                         | N                  | 275             | 272                       | 274         | 275                  | 275          | 272              | 271                    | 274                        |
|                                         | Standardabweichung | 2,743           | 2,648                     | 2,641       | 2,496                | 2,395        | 2,051            | 2,416                  | 2,397                      |
| <b>Durchschnittlich lärmempfindlich</b> | <b>Mittelwert</b>  | <b>6,29</b>     | <b>6,37</b>               | <b>6,23</b> | <b>7,28</b>          | <b>5,90</b>  | <b>7,50</b>      | <b>6,78</b>            | <b>7,28</b>                |
|                                         | N                  | 582             | 577                       | 584         | 578                  | 583          | 579              | 570                    | 583                        |
|                                         | Standardabweichung | 2,313           | 2,451                     | 2,522       | 2,227                | 2,334        | 2,149            | 2,102                  | 2,344                      |
| <b>Sehr lärmempfindlich</b>             | <b>Mittelwert</b>  | <b>5,98</b>     | <b>6,67</b>               | <b>6,01</b> | <b>6,92</b>          | <b>5,52</b>  | <b>7,83</b>      | <b>6,64</b>            | <b>7,40</b>                |
|                                         | N                  | 172             | 169                       | 172         | 172                  | 172          | 168              | 168                    | 172                        |

|                  |                    |             |             |             |             |             |             |             |             |
|------------------|--------------------|-------------|-------------|-------------|-------------|-------------|-------------|-------------|-------------|
|                  | Standardabweichung | 2,612       | 2,556       | 2,700       | 2,654       | 2,687       | 2,015       | 2,396       | 2,590       |
|                  | <b>Mittelwert</b>  | <b>6,32</b> | <b>6,54</b> | <b>6,25</b> | <b>7,24</b> | <b>6,05</b> | <b>7,69</b> | <b>6,85</b> | <b>7,41</b> |
| <b>Insgesamt</b> | N                  | 1029        | 1018        | 1030        | 1025        | 1030        | 1019        | 1009        | 1029        |
|                  | Standardabweichung | 2,491       | 2,528       | 2,585       | 2,379       | 2,445       | 2,112       | 2,246       | 2,404       |

## 10.7. Lebensbedingungen in Innsbruck und Lebensqualität

Befragte, die ihre persönliche Lebensqualität als *nicht gut* einschätzen, beurteilen sämtliche Fragen zu den Lebensbedingungen in Innsbruck sehr deutlich unter dem Mittelwert aller anderen Befragten.

Ganz besonders ausgeprägt sind die Unterschiede im Antwortverhalten zwischen Probandinnen und Probanden mit sehr hoher Selbsteinschätzung der eigenen Lebensqualität und jenen mit sehr geringer persönlicher Lebensqualität bei den Fragen nach der Güte der Wohnbedingungen und dem Ausmaß der Verbundenheit mit der Stadt Innsbruck:

**Abbildung 61: Lebensbedingungen und persönl. Lebensqualität (gruppiert) im Mittelwertvergleich**

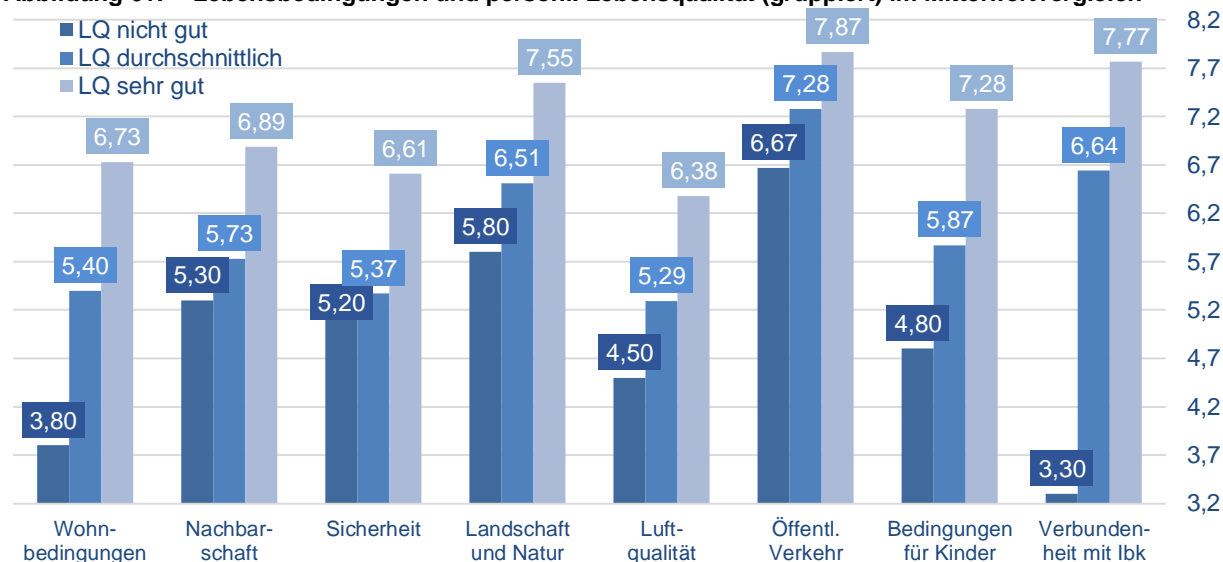

## 10.8. Lebensbedingungen in Innsbruck und Verkehrslärmbelastung

### 10.8.1. Straßenverkehrslärmbelastung

Ein Zusammenhang zwischen der Straßenlärmbelastung und der Einschätzung der eigenen Lebensbedingungen ist nachweisbar. Vom 24h-Straßenverkehrslärm gering belastete Befragte schätzen die Lebensbedingungen in Innsbruck deutlich höher ein, als mittelgradig oder stark belastete Probandinnen und Probanden. Ausnahmen bilden die Fragen nach der Güte des öffentlichen Verkehrs und der Verbundenheit zur Stadt Innsbruck:

**Abbildung 62: Lebensbedingungen und 24h-Straßenverkehrslärmbelastung  $L_{den}$  (gruppiert) im Mittelwertvergleich**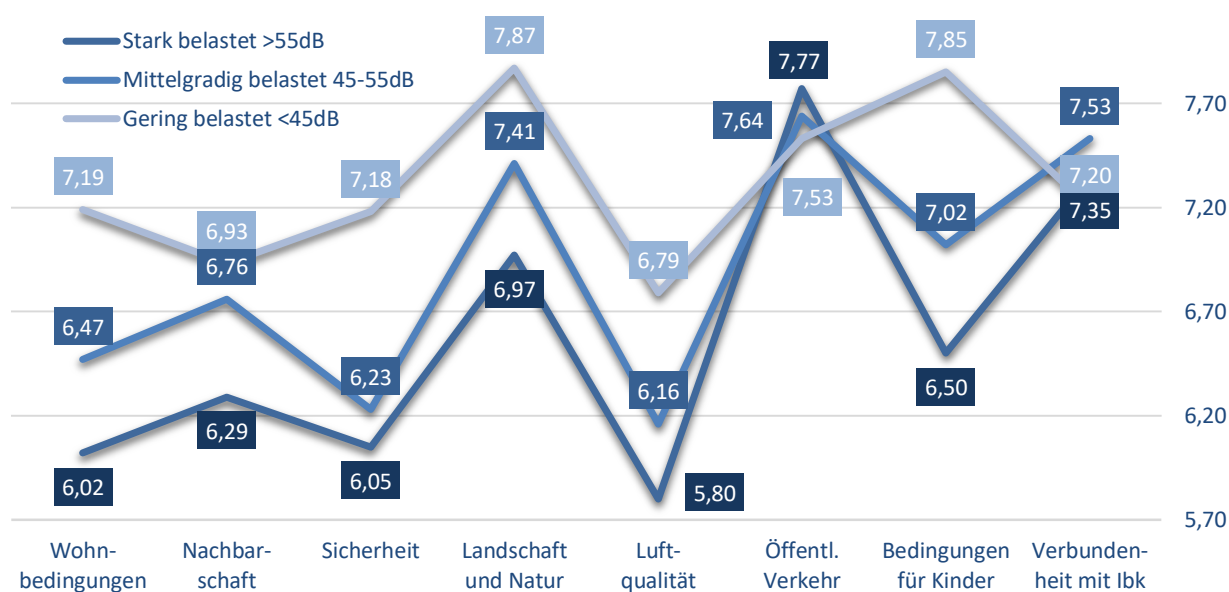

### 10.8.2. Schienenverkehrslärmbelastung

Das Belastungsausmaß durch Schienenverkehrslärm zeigt in Zusammenschau mit der Einschätzung der Lebensbedingungen in Innsbruck keine bis äußerst geringfügige Zusammenhänge. Dies ist neben den statistischen Korrelationsauswertungen auch aus dem Mittelwertvergleich der drei eingeteilten Belastungsgruppen ersichtlich:

**Tabelle 57: Lebensbedingungen und 24h-Schienenlärmbelastung  $L_{den}$  im Mittelwertvergleich**

| Schienenlärm 24h gruppiert           |                    | Wohnbedingungen | Nachbarschaftsbeziehungen | Sicherheit  | Landschaft und Natur | Luftqualität | Öffentl. Verkehr | Bedingungen für Kinder | Verbundenheit zu Innsbruck |
|--------------------------------------|--------------------|-----------------|---------------------------|-------------|----------------------|--------------|------------------|------------------------|----------------------------|
| <b>Stark belastet &gt;55dB</b>       | <b>Mittelwert</b>  | <b>6,00</b>     | <b>6,43</b>               | <b>6,33</b> | <b>7,22</b>          | <b>5,56</b>  | <b>7,16</b>      | <b>6,75</b>            | <b>7,43</b>                |
|                                      | N                  | 115             | 116                       | 116         | 116                  | 115          | 115              | 114                    | 116                        |
|                                      | Standardabweichung | 2,399           | 2,544                     | 2,470       | 2,321                | 2,535        | 2,334            | 2,221                  | 2,389                      |
| <b>Mittelgradig belastet 45-55dB</b> | <b>Mittelwert</b>  | <b>6,48</b>     | <b>6,40</b>               | <b>6,02</b> | <b>7,17</b>          | <b>6,21</b>  | <b>7,67</b>      | <b>6,69</b>            | <b>7,36</b>                |
|                                      | N                  | 320             | 317                       | 320         | 320                  | 320          | 319              | 318                    | 320                        |
|                                      | Standardabweichung | 2,555           | 2,554                     | 2,773       | 2,536                | 2,459        | 2,053            | 2,383                  | 2,446                      |
| <b>Gering belastet &lt;45dB</b>      | <b>Mittelwert</b>  | <b>6,30</b>     | <b>6,64</b>               | <b>6,35</b> | <b>7,27</b>          | <b>6,06</b>  | <b>7,81</b>      | <b>6,95</b>            | <b>7,42</b>                |
|                                      | N                  | 594             | 585                       | 594         | 589                  | 595          | 585              | 577                    | 593                        |
|                                      | Standardabweichung | 2,472           | 2,510                     | 2,497       | 2,304                | 2,411        | 2,085            | 2,169                  | 2,388                      |
|                                      | <b>Mittelwert</b>  | <b>6,32</b>     | <b>6,54</b>               | <b>6,25</b> | <b>7,24</b>          | <b>6,05</b>  | <b>7,69</b>      | <b>6,85</b>            | <b>7,41</b>                |
| <b>Insgesamt</b>                     | N                  | 1029            | 1018                      | 1030        | 1025                 | 1030         | 1019             | 1009                   | 1029                       |
|                                      | Standardabweichung | 2,491           | 2,528                     | 2,585       | 2,379                | 2,445        | 2,112            | 2,246                  | 2,404                      |

### 10.8.3. Flugverkehrslärmbelastung

Auch die 24h-Fluglärmbelastung zeigt im Gegensatz zur 24h-Straßenverkehrslärmbelastung keine eindeutigen Zusammenhänge mit der Einschätzung der Lebensbedingungen in Innsbruck auf:

**Tabelle 58: Lebensbedingungen und 24h-Fluglärmbelastung  $L_{den}$  im Mittelwertvergleich**

| Fluglärm 24h gruppiert       |                    | Wohnbedingungen | Nachbarschaftsbeziehungen | Sicherheit  | Landschaft und Natur | Luftqualität | Öffentl. Verkehr | Bedingungen für Kinder | Verbundenheit zu Innsbruck |
|------------------------------|--------------------|-----------------|---------------------------|-------------|----------------------|--------------|------------------|------------------------|----------------------------|
| <b>Stark belastet</b>        | <b>Mittelwert</b>  | <b>6,30</b>     | <b>6,76</b>               | <b>6,50</b> | <b>7,18</b>          | <b>5,95</b>  | <b>7,87</b>      | <b>6,97</b>            | <b>7,68</b>                |
|                              | N                  | 110             | 109                       | 112         | 111                  | 112          | 111              | 103                    | 112                        |
| <b>&gt;55dB</b>              | Standardabweichung | 2,463           | 2,592                     | 2,394       | 2,200                | 2,201        | 1,903            | 2,007                  | 2,428                      |
| <b>Mittelgradig belastet</b> | <b>Mittelwert</b>  | <b>5,93</b>     | <b>6,21</b>               | <b>6,06</b> | <b>6,88</b>          | <b>5,67</b>  | <b>7,51</b>      | <b>6,35</b>            | <b>7,29</b>                |
|                              | N                  | 360             | 356                       | 359         | 357                  | 359          | 352              | 351                    | 360                        |
| <b>55dB</b>                  | Standardabweichung | 2,574           | 2,624                     | 2,661       | 2,494                | 2,432        | 2,252            | 2,343                  | 2,417                      |
| <b>Gering belastet</b>       | <b>Mittelwert</b>  | <b>6,58</b>     | <b>6,71</b>               | <b>6,31</b> | <b>7,47</b>          | <b>6,31</b>  | <b>7,78</b>      | <b>7,14</b>            | <b>7,42</b>                |
|                              | N                  | 559             | 553                       | 559         | 557                  | 559          | 556              | 555                    | 557                        |
| <b>&lt;45dB</b>              | Standardabweichung | 2,413           | 2,434                     | 2,569       | 2,312                | 2,470        | 2,055            | 2,173                  | 2,390                      |
|                              | <b>Mittelwert</b>  | <b>6,32</b>     | <b>6,54</b>               | <b>6,25</b> | <b>7,24</b>          | <b>6,05</b>  | <b>7,69</b>      | <b>6,85</b>            | <b>7,41</b>                |
| <b>Insgesamt</b>             | N                  | 1029            | 1018                      | 1030        | 1025                 | 1030         | 1019             | 1009                   | 1029                       |
|                              | Standardabweichung | 2,491           | 2,528                     | 2,585       | 2,379                | 2,445        | 2,112            | 2,246                  | 2,404                      |

## 10.9. Lebensbedingungen in Innsbruck und Lärmexpositionsempfinden

### 10.9.1. Lärmexpositionsempfinden insgesamt

Je stärker sich Befragte dem Lärm insgesamt ausgesetzt sehen, desto geringer werden die Lebensbedingungen in Innsbruck eingeschätzt:

**Abbildung 63: Lebensbedingungen und Lärmexpositionsempfinden insgesamt (gruppiert) im Mittelwertvergleich**

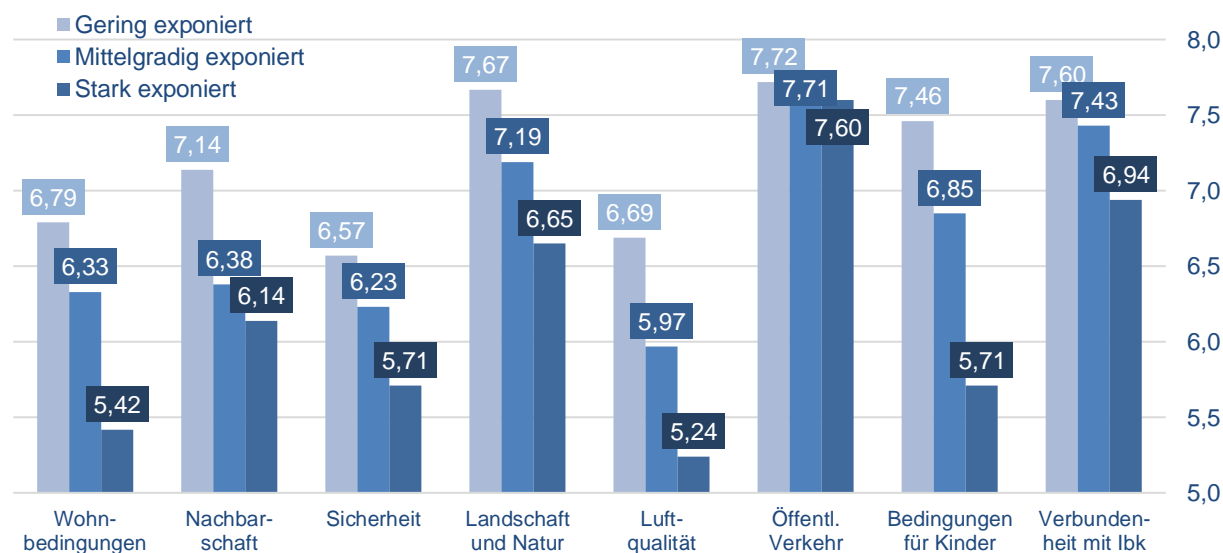



Wiederum bleibt die Frage nach der Güte der öffentlichen Verkehrsverbindungen davon weitestgehend unberührt.

### 10.9.2. Straßenlärmexpositionsempfinden

Ein sehr ähnliches Bild wie in der Zusammenschau mit dem Lärmexpositionsempfinden insgesamt zeigt sich bei der Zuordnung der Einschätzung der Ausgesetzttheit der eigenen Wohnung / des eigenen Hauses gegenüber Straßenverkehrslärm, wenn auch etwas geringer ausgeprägt:

**Tabelle 59: Lebensbedingungen und Straßenlärmexpositionsempfinden im Mittelwertvergleich**

| Ausgesetzttheit Strassenlärm gruppiert |                    | Wohnbedingungen | Nachbarschaftsbeziehungen | Sicherheit  | Landschaft und Natur | Luftqualität | Öffentl. Verkehr | Bedingungen für Kinder | Verbundenheit zu Innsbruck |
|----------------------------------------|--------------------|-----------------|---------------------------|-------------|----------------------|--------------|------------------|------------------------|----------------------------|
| <b>Gering exponiert</b>                | <b>Mittelwert</b>  | <b>6,70</b>     | <b>6,80</b>               | <b>6,55</b> | <b>7,47</b>          | <b>6,55</b>  | <b>7,70</b>      | <b>7,25</b>            | <b>7,46</b>                |
|                                        | N                  | 429             | 423                       | 429         | 424                  | 430          | 427              | 421                    | 428                        |
|                                        | Standardabweichung | 2,496           | 2,478                     | 2,456       | 2,353                | 2,394        | 2,203            | 2,199                  | 2,404                      |
| <b>Mittelgradig exponiert</b>          | <b>Mittelwert</b>  | <b>6,19</b>     | <b>6,45</b>               | <b>6,19</b> | <b>7,18</b>          | <b>5,82</b>  | <b>7,67</b>      | <b>6,76</b>            | <b>7,44</b>                |
|                                        | N                  | 463             | 459                       | 464         | 464                  | 463          | 456              | 451                    | 464                        |
|                                        | Standardabweichung | 2,427           | 2,478                     | 2,499       | 2,263                | 2,348        | 2,021            | 2,093                  | 2,251                      |
| <b>Stark exponiert</b>                 | <b>Mittelwert</b>  | <b>5,57</b>     | <b>6,04</b>               | <b>5,47</b> | <b>6,69</b>          | <b>5,23</b>  | <b>7,76</b>      | <b>5,93</b>            | <b>7,12</b>                |
|                                        | N                  | 137             | 136                       | 137         | 137                  | 137          | 136              | 137                    | 137                        |
|                                        | Standardabweichung | 2,494           | 2,761                     | 3,066       | 2,735                | 2,598        | 2,134            | 2,563                  | 2,861                      |
| <b>Insgesamt</b>                       | <b>Mittelwert</b>  | <b>6,32</b>     | <b>6,54</b>               | <b>6,25</b> | <b>7,24</b>          | <b>6,05</b>  | <b>7,69</b>      | <b>6,85</b>            | <b>7,41</b>                |
|                                        | N                  | 1029            | 1018                      | 1030        | 1025                 | 1030         | 1019             | 1009                   | 1029                       |
|                                        | Standardabweichung | 2,491           | 2,528                     | 2,585       | 2,379                | 2,445        | 2,112            | 2,246                  | 2,404                      |

### 10.9.3. Fluglärmexpositionsempfinden

**Abbildung 64: Lebensbedingungen und Fluglärmexpositionsempfinden (gruppiert) im Mittelwertvergleich**

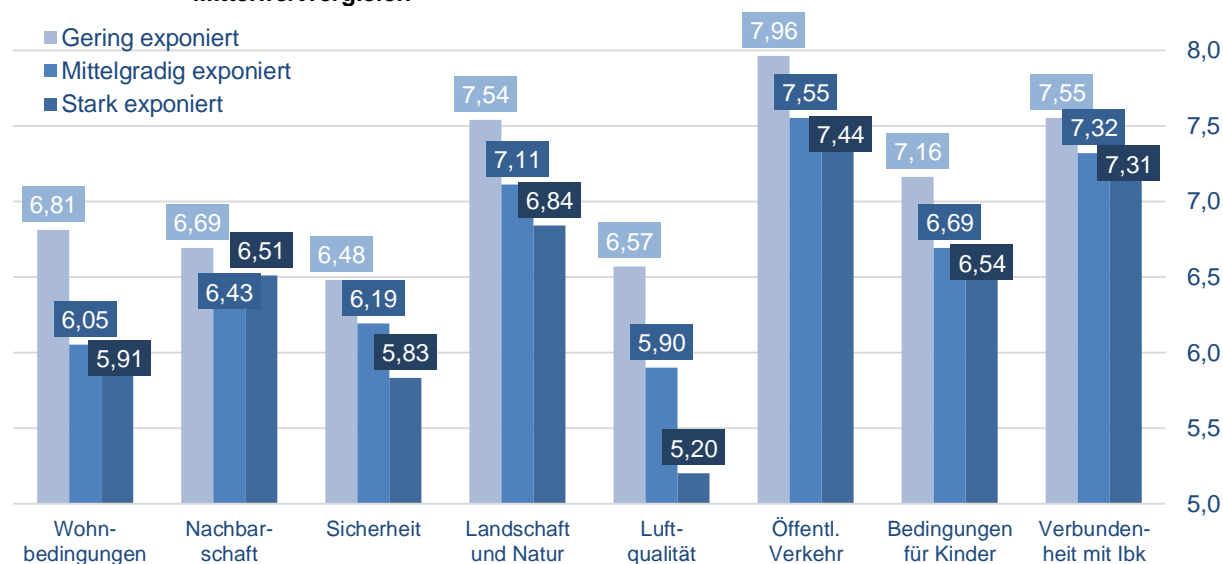

Auch die Einschätzung der eigenen Exposition durch Flugverkehrslärm weist in der Kombination mit der Beurteilung der Güte der Lebensbedingungen in Innsbruck Zusammenhänge auf. Besonders die Wohnbedingungen und die Luftqualität werden von den sich selbst dem Fluglärm stärker ausgesetzt sehenden Befragten niedriger eingeschätzt, als von sich weniger exponiert empfindenden Probandinnen und Probanden.

Im Gegensatz zu den Auswertungen bezogen auf die real vorhandene Belastung durch Flugverkehrslärm, zeigt die persönliche Einschätzung der eigenen Ausgesetzttheit deutliche Unterschiede in der Bewertung der Lebensbedingungen in Innsbruck auf.

#### 10.9.4. Schienenverkehrslärmexpositionsempfinden

Das Empfinden der Ausgesetzttheit gegenüber Schienenverkehrslärm zeigt in der Zusammenschau mit der Beurteilung der Lebensbedingungen in Innsbruck vergleichsweise geringere Zusammenhänge:

**Abbildung 65: Lebensbedingungen und Schienenverkehrslärmexpositionsempfinden (gruppiert) im Mittelwertvergleich**

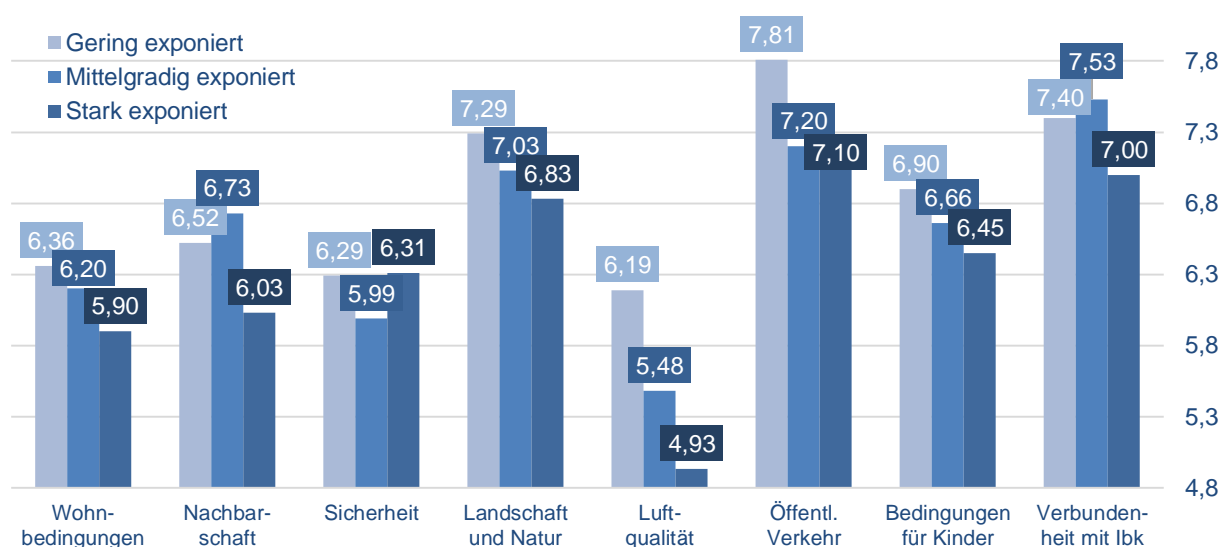

Sich stärker dem Schienenverkehrslärm exponiert fühlenden Befragte beurteilen die Lebensbedingungen insgesamt aber auch in dieser Kombination schlechter als die sich weniger stark exponiert Fühlenden. Am stärksten ausgeprägt sind die Unterschiede bei der Frage nach der Innsbrucker Luftqualität.

### 10.10. Lebensbedingungen in Innsbruck und Lärmbelästigung

#### 10.10.1. Lärmbelästigung insgesamt

Die Lebensbedingungen in Innsbruck werden von Befragten, welche sich durch den Lärm insgesamt stärker gestört fühlen, deutlich schlechter bewertet, als von Personen, die sich weniger lärmbeeinträchtigt fühlen:

**Abbildung 66: Lebensbedingungen und Lärmbelastigung insgesamt (gruppiert) im Mittelwertvergleich**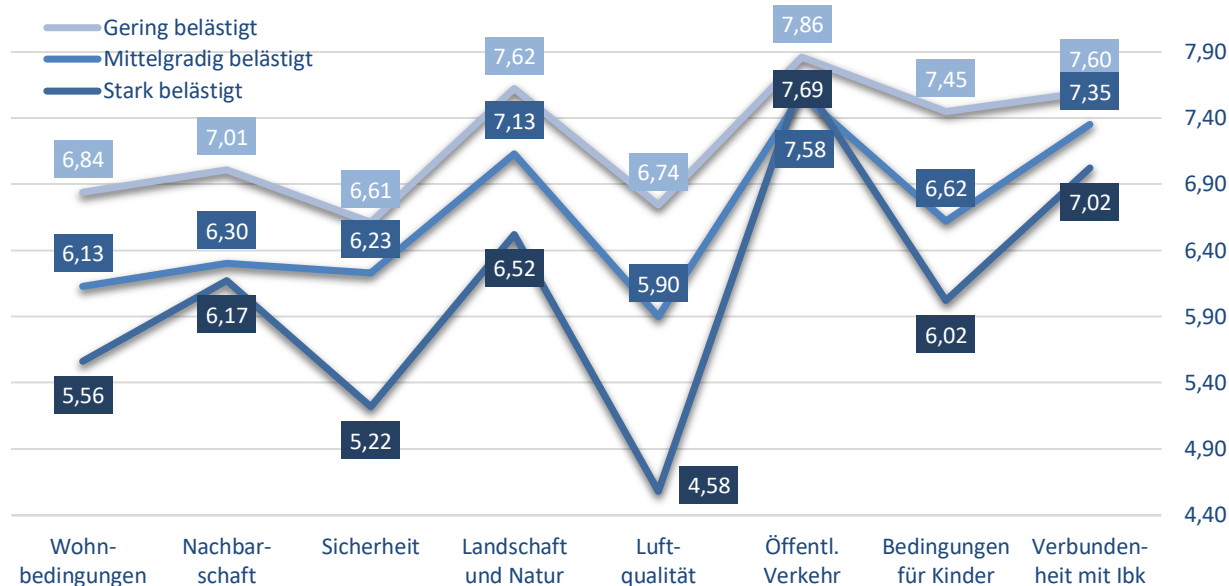

Wie schon bei der Zusammenschau mit den Variablen *vorhandene Lärmbelastung* und *Lärmexpositionsempfinden* bleibt die Bewertung der Güte der öffentlichen Verkehrsverbindungen auch von der Einschätzung der Lärmbelastigung insgesamt weitestgehend unberührt.

### 10.10.2. Straßenverkehrslärmbelastigung

Dasselbe Bild wie bei der Lärmbelastigung insgesamt, im Vergleich etwas weniger ausgeprägt, zeigt die Zusammenschau der Straßenverkehrslärmbelastigung mit der Einschätzung der Lebensbedingungen:

**Abbildung 67: Lebensbedingungen und Straßenlärmbelastigung (gruppiert) im Mittelwertvergleich**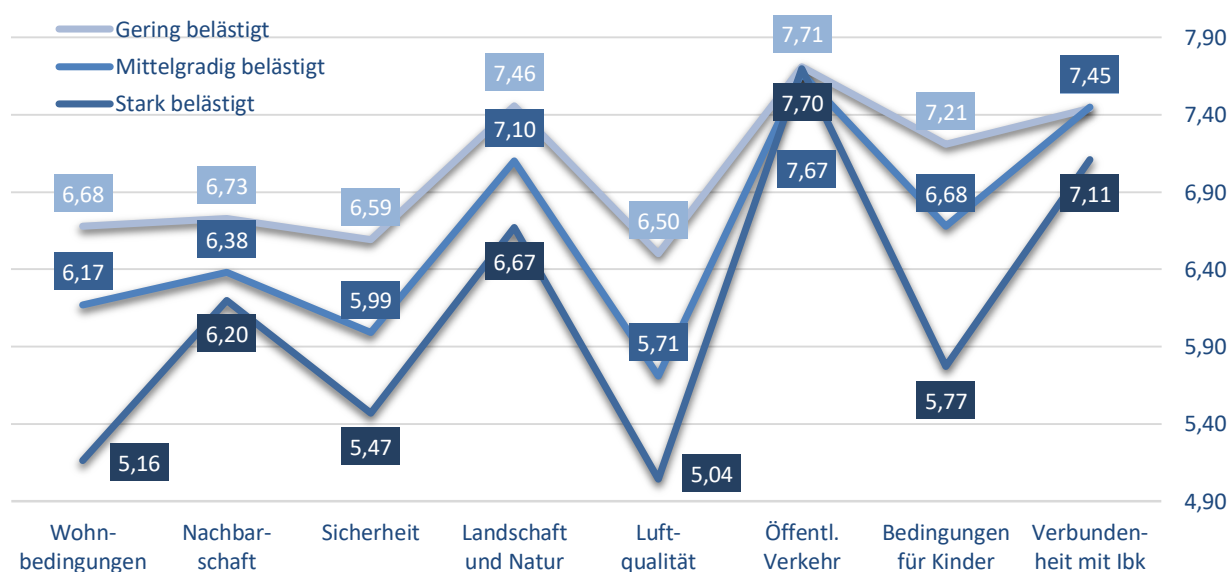

### 10.10.3. Flugverkehrslärmbelästigung

Sehr ähnlich wie bei der Lärmbelästigung insgesamt und der Straßenverkehrslärmbelästigung sinkt die Einschätzung der Lebensbedingungen auch in Zusammenschau mit der Flugverkehrslärmbelästigung bei steigender Belästigung stetig und vice versa:

**Abbildung 68: Lebensbedingungen und Fluglärmbelästigung (gruppiert) im Mittelwertvergleich**

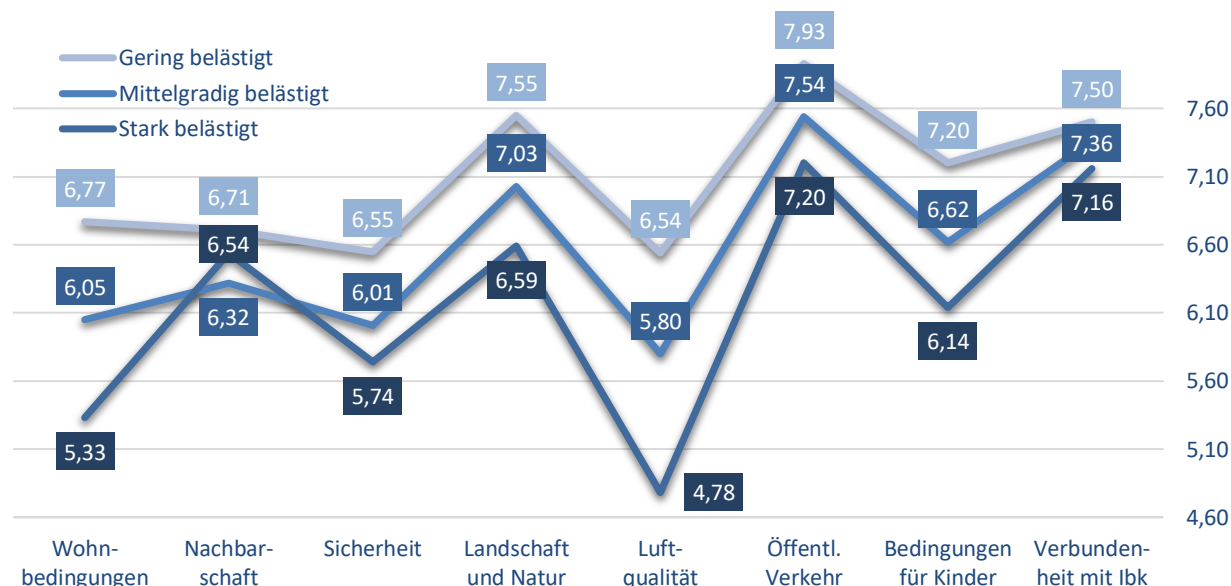

### 10.10.4. Schienenverkehrslärmbelästigung

Vom Schienenverkehrslärm stärker belästigte Befragte beurteilen die Lebensbedingungen in Innsbruck ebenfalls schlechter als sich weniger stark gestört fühlende Personen. Die Unterschiede sind allerdings wesentlich geringer ausgeprägt als in Zusammenschau mit der Lärmbelästigung insgesamt, der Straßen- und der Flugverkehrslärmbelästigung und statistisch nicht eindeutig (eine Ausnahme bildet dabei die Frage nach der Güte der Wohnbedingungen):

**Abbildung 69: Lebensbedingungen und Schienenlärmbelästigung (gruppiert) im Mittelwertvergleich**

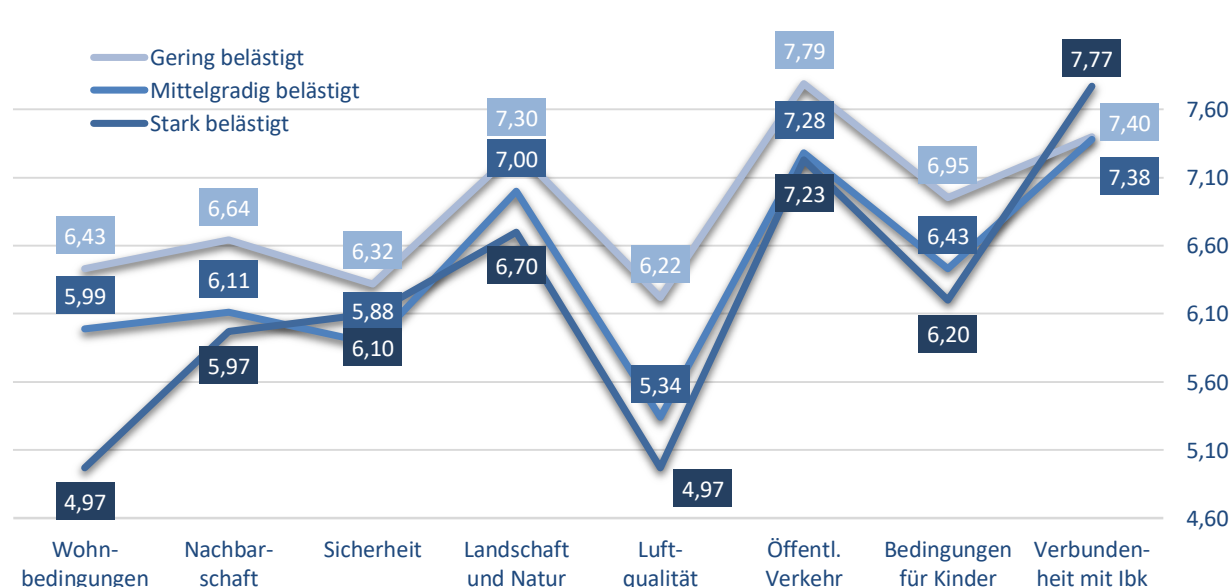

### 10.10.5. Nicht verkehrsverursachte Lärmbelästigung

Auch die sich von nicht verkehrsverursachten Lärm stärker gestört fühlenden Befragten schätzen die Lebensbedingungen in Innsbruck schlechter ein, als dies sich weniger lärmbeeinträchtigt empfindende Personen tun. Im Vergleich zu den verkehrsverursachten Belastungsreaktionen fallen diese jedoch etwas geringer aus:

**Tabelle 60: Lebensbedingungen und Belästigung durch Nachbarschaftslärm im Mittelwertvergleich**

| Belästigung Nachbarschaftslärm gruppiert |                    | Wohnbedingungen | Nachbarschaftsbeziehungen | Sicherheit  | Landschaft und Natur | Luftqualität | Öffentl. Verkehr | Bedingungen für Kinder | Verbundenheit zu Innsbruck |
|------------------------------------------|--------------------|-----------------|---------------------------|-------------|----------------------|--------------|------------------|------------------------|----------------------------|
| <b>Gering belästigt</b>                  | <b>Mittelwert</b>  | <b>6,50</b>     | <b>6,90</b>               | <b>6,42</b> | <b>7,43</b>          | <b>6,26</b>  | <b>7,77</b>      | <b>7,08</b>            | <b>7,51</b>                |
|                                          | N                  | 734             | 725                       | 735         | 732                  | 735          | 727              | 718                    | 735                        |
|                                          | Standardabweichung | 2,468           | 2,476                     | 2,512       | 2,269                | 2,373        | 2,118            | 2,128                  | 2,319                      |
| <b>Mittelgradig belästigt</b>            | <b>Mittelwert</b>  | <b>6,02</b>     | <b>5,77</b>               | <b>6,02</b> | <b>6,93</b>          | <b>5,65</b>  | <b>7,46</b>      | <b>6,44</b>            | <b>7,25</b>                |
|                                          | N                  | 243             | 242                       | 243         | 241                  | 243          | 241              | 239                    | 242                        |
|                                          | Standardabweichung | 2,393           | 2,383                     | 2,558       | 2,429                | 2,491        | 2,129            | 2,320                  | 2,466                      |
| <b>Stark belästigt</b>                   | <b>Mittelwert</b>  | <b>5,25</b>     | <b>5,08</b>               | <b>4,90</b> | <b>5,88</b>          | <b>4,98</b>  | <b>7,75</b>      | <b>5,52</b>            | <b>6,63</b>                |
|                                          | N                  | 52              | 51                        | 52          | 52                   | 52           | 51               | 52                     | 52                         |
|                                          | Standardabweichung | 2,889           | 2,629                     | 3,231       | 3,033                | 2,747        | 1,896            | 2,747                  | 3,074                      |
| <b>Insgesamt</b>                         | <b>Mittelwert</b>  | <b>6,32</b>     | <b>6,54</b>               | <b>6,25</b> | <b>7,24</b>          | <b>6,05</b>  | <b>7,69</b>      | <b>6,85</b>            | <b>7,41</b>                |
|                                          | N                  | 1029            | 1018                      | 1030        | 1025                 | 1030         | 1019             | 1009                   | 1029                       |
|                                          | Standardabweichung | 2,491           | 2,528                     | 2,585       | 2,379                | 2,445        | 2,112            | 2,246                  | 2,404                      |

**Tabelle 61: Lebensbedingungen und Belästigung durch Baustellenlärm im Mittelwertvergleich**

| Belästigung Baustellenlärm gruppiert |                    | Wohnbedingungen | Nachbarschaftsbeziehungen | Sicherheit  | Landschaft und Natur | Luftqualität | Öffentl. Verkehr | Bedingungen für Kinder | Verbundenheit zu Innsbruck |
|--------------------------------------|--------------------|-----------------|---------------------------|-------------|----------------------|--------------|------------------|------------------------|----------------------------|
| <b>Gering belästigt</b>              | <b>Mittelwert</b>  | <b>6,46</b>     | <b>6,71</b>               | <b>6,41</b> | <b>7,35</b>          | <b>6,19</b>  | <b>7,75</b>      | <b>7,11</b>            | <b>7,52</b>                |
|                                      | N                  | 669             | 660                       | 669         | 664                  | 670          | 661              | 653                    | 668                        |
|                                      | Standardabweichung | 2,500           | 2,512                     | 2,514       | 2,284                | 2,441        | 2,066            | 2,094                  | 2,339                      |
| <b>Mittelgradig belästigt</b>        | <b>Mittelwert</b>  | <b>6,23</b>     | <b>6,17</b>               | <b>6,02</b> | <b>7,06</b>          | <b>5,91</b>  | <b>7,61</b>      | <b>6,59</b>            | <b>7,17</b>                |
|                                      | N                  | 263             | 261                       | 264         | 264                  | 263          | 262              | 259                    | 264                        |
|                                      | Standardabweichung | 2,375           | 2,565                     | 2,550       | 2,538                | 2,365        | 2,199            | 2,298                  | 2,431                      |
| <b>Stark belästigt</b>               | <b>Mittelwert</b>  | <b>5,59</b>     | <b>6,34</b>               | <b>5,69</b> | <b>6,90</b>          | <b>5,44</b>  | <b>7,56</b>      | <b>5,78</b>            | <b>7,22</b>                |
|                                      | N                  | 96              | 96                        | 96          | 96                   | 96           | 95               | 96                     | 96                         |
|                                      | Standardabweichung | 2,634           | 2,436                     | 3,034       | 2,544                | 2,607        | 2,187            | 2,696                  | 2,731                      |
| <b>Insgesamt</b>                     | <b>Mittelwert</b>  | <b>6,32</b>     | <b>6,54</b>               | <b>6,25</b> | <b>7,24</b>          | <b>6,05</b>  | <b>7,69</b>      | <b>6,85</b>            | <b>7,41</b>                |
|                                      | N                  | 1029            | 1018                      | 1030        | 1025                 | 1030         | 1019             | 1009                   | 1029                       |
|                                      | Standardabweichung | 2,491           | 2,528                     | 2,585       | 2,379                | 2,445        | 2,112            | 2,246                  | 2,404                      |

**Tabelle 62: Lebensbedingungen und Belästigung durch Lärm von Passanten und Gaststätten im Mittelwertvergleich**

| Belästigung Lärm von Passanten und Gaststätten gruppiert |                    | Wohnbedingungen | Nachbarschaftsbeziehungen | Sicherheit  | Landschaft und Natur | Luftqualität | Öffentl. Verkehr | Bedingungen für Kinder | Verbundenheit zu Innsbruck |
|----------------------------------------------------------|--------------------|-----------------|---------------------------|-------------|----------------------|--------------|------------------|------------------------|----------------------------|
| <b>Gering belästigt</b>                                  | <b>Mittelwert</b>  | <b>6,57</b>     | <b>6,75</b>               | <b>6,46</b> | <b>7,39</b>          | <b>6,21</b>  | <b>7,68</b>      | <b>7,13</b>            | <b>7,44</b>                |
|                                                          | N                  | 746             | 737                       | 747         | 742                  | 747          | 740              | 730                    | 746                        |
|                                                          | Standardabweichung | 2,403           | 2,486                     | 2,498       | 2,293                | 2,456        | 2,162            | 2,111                  | 2,352                      |
| <b>Mittelgradig belästigt</b>                            | <b>Mittelwert</b>  | <b>5,69</b>     | <b>5,95</b>               | <b>5,71</b> | <b>6,83</b>          | <b>5,62</b>  | <b>7,74</b>      | <b>6,18</b>            | <b>7,38</b>                |
|                                                          | N                  | 233             | 231                       | 233         | 233                  | 233          | 231              | 230                    | 233                        |
|                                                          | Standardabweichung | 2,550           | 2,560                     | 2,591       | 2,489                | 2,368        | 1,925            | 2,314                  | 2,363                      |
| <b>Stark belästigt</b>                                   | <b>Mittelwert</b>  | <b>5,54</b>     | <b>6,24</b>               | <b>5,46</b> | <b>6,90</b>          | <b>5,70</b>  | <b>7,73</b>      | <b>5,82</b>            | <b>6,94</b>                |
|                                                          | N                  | 50              | 50                        | 50          | 50                   | 50           | 48               | 49                     | 50                         |
|                                                          | Standardabweichung | 2,859           | 2,584                     | 3,290       | 2,859                | 2,401        | 2,238            | 2,870                  | 3,235                      |
| <b>Insgesamt</b>                                         | <b>Mittelwert</b>  | <b>6,32</b>     | <b>6,54</b>               | <b>6,25</b> | <b>7,24</b>          | <b>6,05</b>  | <b>7,69</b>      | <b>6,85</b>            | <b>7,41</b>                |
|                                                          | N                  | 1029            | 1018                      | 1030        | 1025                 | 1030         | 1019             | 1009                   | 1029                       |
|                                                          | Standardabweichung | 2,491           | 2,528                     | 2,585       | 2,379                | 2,445        | 2,112            | 2,246                  | 2,404                      |

**Tabelle 63: Lebensbedingungen und Belästigung durch Erschütterungen im Mittelwertvergleich**

| Belästigung Erschütterungen gesamt gruppiert |                    | Wohnbedingungen | Nachbarschaftsbeziehungen | Sicherheit  | Landschaft und Natur | Luftqualität | Öffentl. Verkehr | Bedingungen für Kinder | Verbundenheit zu Innsbruck |
|----------------------------------------------|--------------------|-----------------|---------------------------|-------------|----------------------|--------------|------------------|------------------------|----------------------------|
| <b>Gering belästigt</b>                      | <b>Mittelwert</b>  | <b>6,52</b>     | <b>6,71</b>               | <b>6,38</b> | <b>7,39</b>          | <b>6,21</b>  | <b>7,76</b>      | <b>7,05</b>            | <b>7,46</b>                |
|                                              | N                  | 860             | 850                       | 861         | 856                  | 862          | 854              | 843                    | 860                        |
|                                              | Standardabweichung | 2,443           | 2,457                     | 2,502       | 2,303                | 2,423        | 2,072            | 2,132                  | 2,326                      |
| <b>Mittelgradig belästigt</b>                | <b>Mittelwert</b>  | <b>5,38</b>     | <b>5,78</b>               | <b>5,61</b> | <b>6,47</b>          | <b>5,31</b>  | <b>7,34</b>      | <b>5,97</b>            | <b>7,28</b>                |
|                                              | N                  | 135             | 134                       | 135         | 135                  | 135          | 131              | 133                    | 135                        |
|                                              | Standardabweichung | 2,473           | 2,565                     | 2,844       | 2,518                | 2,339        | 2,190            | 2,383                  | 2,541                      |
| <b>Stark belästigt</b>                       | <b>Mittelwert</b>  | <b>5,09</b>     | <b>5,38</b>               | <b>5,24</b> | <b>6,47</b>          | <b>4,91</b>  | <b>7,38</b>      | <b>5,21</b>            | <b>6,47</b>                |
|                                              | N                  | 34              | 34                        | 34          | 34                   | 33           | 34               | 33                     | 34                         |
|                                              | Standardabweichung | 2,621           | 3,266                     | 3,026       | 2,967                | 2,650        | 2,663            | 2,955                  | 3,457                      |
| <b>Insgesamt</b>                             | <b>Mittelwert</b>  | <b>6,32</b>     | <b>6,54</b>               | <b>6,25</b> | <b>7,24</b>          | <b>6,05</b>  | <b>7,69</b>      | <b>6,85</b>            | <b>7,41</b>                |
|                                              | N                  | 1029            | 1018                      | 1030        | 1025                 | 1030         | 1019             | 1009                   | 1029                       |
|                                              | Standardabweichung | 2,491           | 2,528                     | 2,585       | 2,379                | 2,445        | 2,112            | 2,246                  | 2,404                      |

**Tabelle 64: Lebensbedingungen und Belästigung durch Lärm aus Gewerbe und Industrie im Mittelwertvergleich**

| Belästigung Lärm aus Gewerbe u. Industrie gruppiert |                    | Wohnbedingungen | Nachbarschaftsbeziehungen | Sicherheit  | Landschaft und Natur | Luftqualität | Öffentl. Verkehr | Bedingungen für Kinder | Verbundenheit zu Innsbruck |
|-----------------------------------------------------|--------------------|-----------------|---------------------------|-------------|----------------------|--------------|------------------|------------------------|----------------------------|
| <b>Gering belästigt</b>                             | <b>Mittelwert</b>  | <b>6,36</b>     | <b>6,59</b>               | <b>6,32</b> | <b>7,30</b>          | <b>6,15</b>  | <b>7,73</b>      | <b>6,96</b>            | <b>7,46</b>                |
|                                                     | N                  | 935             | 924                       | 936         | 931                  | 936          | 927              | 917                    | 935                        |
|                                                     | Standardabweichung | 2,497           | 2,523                     | 2,591       | 2,384                | 2,430        | 2,119            | 2,214                  | 2,394                      |
| <b>Mittelgradig belästigt</b>                       | <b>Mittelwert</b>  | <b>5,96</b>     | <b>6,03</b>               | <b>5,53</b> | <b>6,52</b>          | <b>5,14</b>  | <b>7,21</b>      | <b>5,71</b>            | <b>6,82</b>                |
|                                                     | N                  | 79              | 79                        | 79          | 79                   | 79           | 77               | 77                     | 79                         |
|                                                     | Standardabweichung | 2,377           | 2,567                     | 2,352       | 2,148                | 2,313        | 2,015            | 2,288                  | 2,336                      |
| <b>Stark belästigt</b>                              | <b>Mittelwert</b>  | <b>5,73</b>     | <b>6,13</b>               | <b>5,47</b> | <b>6,87</b>          | <b>4,27</b>  | <b>8,13</b>      | <b>5,73</b>            | <b>7,13</b>                |
|                                                     | N                  | 15              | 15                        | 15          | 15                   | 15           | 15               | 15                     | 15                         |
|                                                     | Standardabweichung | 2,685           | 2,446                     | 2,825       | 2,722                | 2,492        | 1,959            | 2,154                  | 3,067                      |
| <b>Insgesamt</b>                                    | <b>Mittelwert</b>  | <b>6,32</b>     | <b>6,54</b>               | <b>6,25</b> | <b>7,24</b>          | <b>6,05</b>  | <b>7,69</b>      | <b>6,85</b>            | <b>7,41</b>                |
|                                                     | N                  | 1029            | 1018                      | 1030        | 1025                 | 1030         | 1019             | 1009                   | 1029                       |
|                                                     | Standardabweichung | 2,491           | 2,528                     | 2,585       | 2,379                | 2,445        | 2,112            | 2,246                  | 2,404                      |

### 10.11. Lebensbedingungen in Innsbruck und weitere Variablen

Für eine Vielzahl weiterer Variablen lassen sich Zusammenhänge zur Einschätzung der Lebens- und Wohnbedingungen in Innsbruck herstellen. Mit geringerer oder stärkerer Ausprägung zeigen diese zumeist vergleichbare Resultate. Beispielhaft wird an dieser Stelle die Zusammenschau mit der Beurteilung der Lebensbedingungen in Innsbruck und der Frage nach den Schlafgewohnheiten bei offenem / gekipptem oder geschlossenem Fenster dargestellt:

**Abbildung 70: Lebensbedingungen nach Nachtschlaf bei offenem oder gekippten Fenster (gruppiert) im Mittelwertvergleich**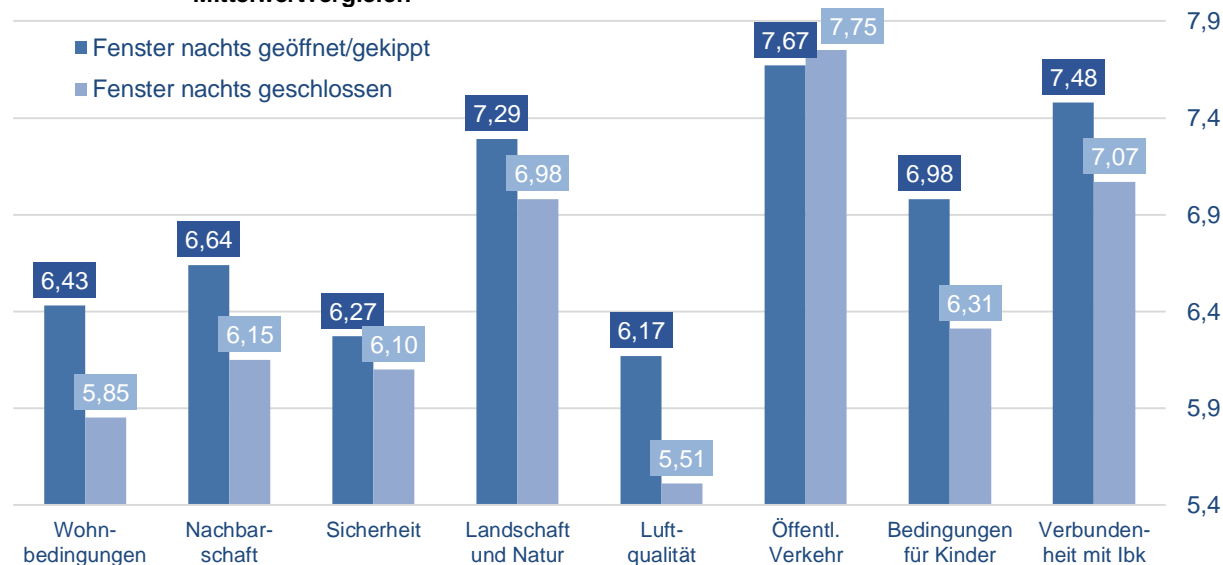

## Zufriedenheit mit der eigenen Wohnsituation

Die Zufriedenheit mit der eigenen Wohnsituation insgesamt wurde mit einem zusätzlichen Item abgefragt.

Über 70% aller Befragten sind mit ihrer eigenen Wohnsituation sehr zufrieden und antworten in den drei höchsten Antwortkategorien, 2,7% sind nicht zufrieden und antworten in den drei Untersten. Genau ein Viertel der Antworten verteilt sich auf die fünf mittleren Kategorien. Eine befragte Person gibt auf die Frage nach der Zufriedenheit mit der eigenen Wohnsituation keine Antwort:

**Abbildung 71: Zufriedenheit mit der eigenen Wohnsituation in Prozent**

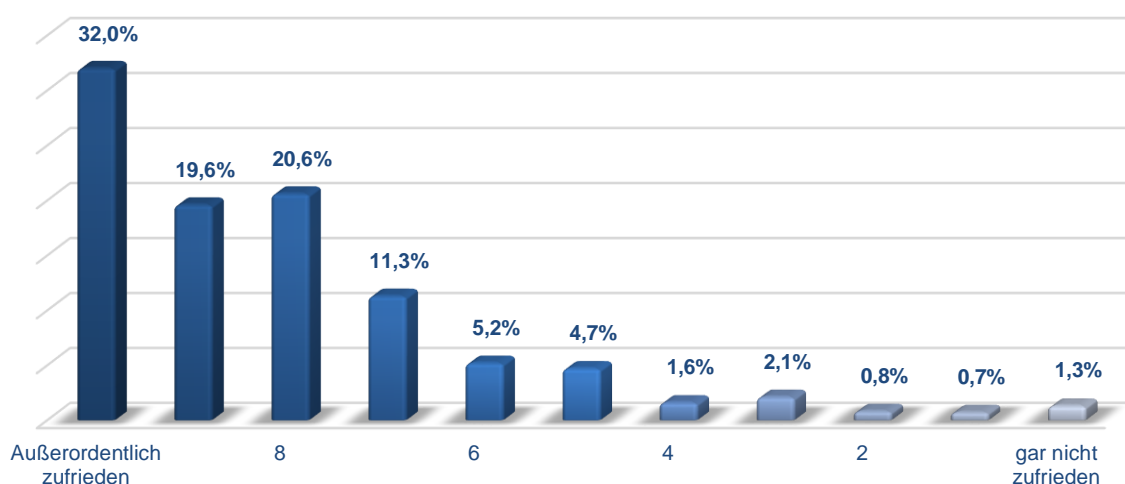

Der Mittelwert der Antworten liegt auf der 11-er Skala von *gar nicht zufrieden* bis *außerordentlich zufrieden* bei 8,11 (Standardfehler 0,07), das entspricht einem durchschnittlichen Zufriedenheitsausmaß mit der eigenen Wohnsituation der befragten Innsbruckerinnen und Innsbrucker von 89,2% vom Maximalwert.

**Tabelle 65: Zufriedenheit mit der eigenen Wohnsituation gruppiert**

|                       | Häufigkeit | Gültige Prozente | Kumulierte Prozente |
|-----------------------|------------|------------------|---------------------|
| Nicht zufrieden       | 28         | 2,7              | 2,7                 |
| Durchschnittlich      | 258        | 25,0             | 27,7                |
| Gültig Sehr zufrieden | 744        | 72,2             | 99,9                |
| w.n. / k.A.           | 1          | ,1               | 100,0               |
| Gesamt                | 1031       | 100,0            |                     |

### 1. Wohnsituation und Katastralgemeinden

Die Zufriedenheit mit der eigenen Wohnsituation insgesamt unterscheidet sich zwischen den Katastralgemeinden und ist in den äußeren Katastralgemeinden höher als in den inneren Stadtteilen:



**Abbildung 72: Zufriedenheit mit der eigenen Wohnsituation und Katastralgemeinde im Mittelwertvergleich (aufsteigend sortiert)**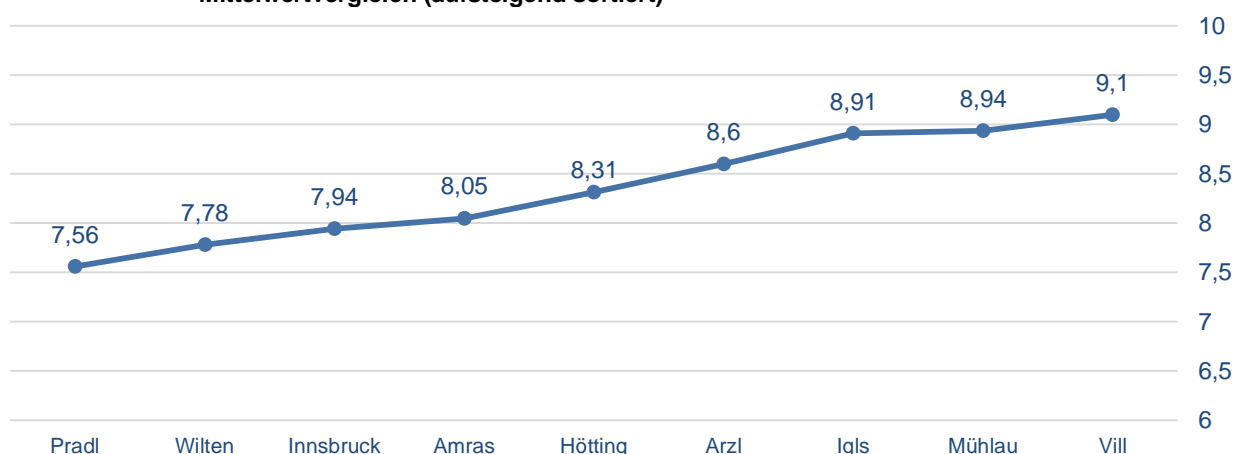**Tabelle 66: Zufriedenheit mit der eigenen Wohnsituation u. Katastralgemeinde im Mittelwertvergleich**

| Katastralgemeinde | Mittelwert | N    | Standardabweichung |
|-------------------|------------|------|--------------------|
| Amras             | 8,05       | 60   | 2,354              |
| Arzl              | 8,60       | 102  | 2,079              |
| Hötting           | 8,31       | 243  | 1,920              |
| Igls              | 8,91       | 35   | ,919               |
| Innsbruck         | 7,94       | 176  | 1,938              |
| Mühlau            | 8,94       | 50   | 1,834              |
| Pradl             | 7,56       | 188  | 2,340              |
| Vill              | 9,10       | 21   | 1,136              |
| Wilten            | 7,78       | 155  | 2,297              |
| Insgesamt         | 8,11       | 1030 | 2,105              |

## 2. Wohnsituation und ausgewählte Variablen

Im Mittelwertvergleich sind keine Unterschiede in der Zufriedenheit mit der eigenen Wohnsituation zwischen den Geschlechtern erkennbar. Bezogen auf die absoluten Häufigkeiten antworten Männer etwas häufiger in den mittleren Antwortkategorien und Frauen zeigen sich häufiger sehr zufrieden mit ihrer Wohnsituation.

Ein ausgeprägter statistischer Zusammenhang mit dem bisher höchsten erreichten Schulabschluss, dem Vorhandensein minderjähriger Kinder im selben Haushalt, der Kfz-Nutzung, der Güte der Einschätzung des eigenen Gesundheitszustandes, dem Vorhandensein von Lärmschutzfenstern oder baulichen Abschirmungen gegen den Verkehrslärm zeigt sich nicht.

Mit zunehmendem Alter steigt die Zufriedenheit mit den eigenen Wohnbedingungen an.

Eigentümerinnen und Eigentümer ihrer Wohnungen bzw. Wohnhäuser sind deutlich zufriedener mit ihren Wohnverhältnissen, als dies Mieterinnen und Mieter, Mitbewohnerinnen und Mitbewohner und Untermieterinnen und Untermieter sind.

**Tabelle 67: Zufriedenheit mit der Wohnsituation und ausgewählte Variablen (gruppiert)**

|                                              |                                 | Ausmaß Zufriedenheit eigene Wohnsituation insgesamt |            |                  |            |                |            |
|----------------------------------------------|---------------------------------|-----------------------------------------------------|------------|------------------|------------|----------------|------------|
|                                              |                                 | Nicht zufrieden                                     |            | Durchschnittlich |            | Sehr zufrieden |            |
|                                              |                                 | Anzahl                                              | Zeilen (%) | Anzahl           | Zeilen (%) | Anzahl         | Zeilen (%) |
| <b>Geschlecht</b>                            | weiblich                        | 16                                                  | 3,0%       | 127              | 23,5%      | 397            | 73,5%      |
|                                              | männlich                        | 12                                                  | 2,4%       | 131              | 26,7%      | 347            | 70,8%      |
| <b>Altersgruppen</b>                         | 18 bis 40 Jahre                 | 16                                                  | 3,6%       | 134              | 30,5%      | 289            | 65,8%      |
|                                              | 41 bis 60 Jahre                 | 7                                                   | 2,2%       | 81               | 25,6%      | 228            | 72,2%      |
|                                              | über 60 Jahre                   | 5                                                   | 1,8%       | 43               | 15,6%      | 227            | 82,5%      |
| <b>Bildungsschicht</b>                       | Primärer Schulabschluss         | 5                                                   | 5,1%       | 19               | 19,4%      | 74             | 75,5%      |
|                                              | Sekundärer Schulabschluss       | 12                                                  | 2,2%       | 144              | 26,6%      | 385            | 71,2%      |
|                                              | Tertiärer Schulabschluss        | 11                                                  | 2,8%       | 94               | 24,2%      | 283            | 72,9%      |
| <b>Eigentums-<br/>verhältnisse</b>           | Eigentümer/in                   | 6                                                   | 1,4%       | 63               | 15,0%      | 350            | 83,5%      |
|                                              | Hauptmieter/in                  | 16                                                  | 3,5%       | 152              | 33,6%      | 285            | 62,9%      |
|                                              | Mitbewohner/in, Untermieter/in  | 6                                                   | 3,8%       | 43               | 27,2%      | 109            | 69,0%      |
| <b>Haushalt mit/<br/>ohne mj. Kinder</b>     | Haushalt ohne Kinder            | 17                                                  | 2,2%       | 189              | 24,8%      | 555            | 72,9%      |
|                                              | Haushalt mit Kindern            | 11                                                  | 4,1%       | 69               | 25,7%      | 189            | 70,3%      |
| <b>Baulicher Schutz vor<br/>Verkehrslärm</b> | Kaum Abschirmung                | 24                                                  | 3,1%       | 193              | 25,2%      | 548            | 71,6%      |
|                                              | Gute Abschirmung                | 3 (*)                                               | 1,3%       | 53               | 22,5%      | 180            | 76,3%      |
| <b>Nachtschlaf</b>                           | Fenster nachts geöffnet/gekippt | 17                                                  | 2,1%       | 196              | 23,9%      | 607            | 74,0%      |
|                                              | Fenster nachts geschlossen      | 11                                                  | 5,4%       | 59               | 29,2%      | 132            | 65,3%      |
| <b>Lärmschutzfenster</b>                     | Ja                              | 7                                                   | 3,7%       | 48               | 25,7%      | 132            | 70,6%      |
|                                              | Nein                            | 19                                                  | 2,8%       | 158              | 23,5%      | 494            | 73,6%      |
|                                              | weiß nicht/ k.A.                | 2                                                   | 1,2%       | 52               | 30,2%      | 118            | 68,6%      |
| <b>Summenscore Le-<br/>bensbedingungen</b>   | Nicht gut (*)                   | 1                                                   | 20,0%      | 4                | 80,0%      | 0              | 0,0%       |
|                                              | Durchschnittlich                | 24                                                  | 3,6%       | 217              | 32,4%      | 428            | 64,0%      |
|                                              | Sehr gut                        | 3                                                   | 0,8%       | 37               | 10,4%      | 316            | 88,8%      |
| <b>Lebensqualität</b>                        | Nicht gut (*)                   | 2                                                   | 20,0%      | 5                | 50,0%      | 3              | 30,0%      |
|                                              | Durchschnittlich                | 21                                                  | 7,2%       | 149              | 51,4%      | 120            | 41,4%      |
|                                              | Sehr gut                        | 5                                                   | 0,7%       | 102              | 14,1%      | 617            | 85,2%      |
| <b>Lärmempfindlichkeit</b>                   | Nicht lärmempfindlich           | 6                                                   | 2,2%       | 54               | 19,7%      | 214            | 78,1%      |
|                                              | Durchschnittlich                | 14                                                  | 2,4%       | 160              | 27,4%      | 410            | 70,2%      |
|                                              | Sehr lärmempfindlich            | 8                                                   | 4,7%       | 44               | 25,6%      | 120            | 69,8%      |
| <b>Gesundheitszustand</b>                    | Gut                             | 20                                                  | 2,7%       | 183              | 24,3%      | 550            | 73,0%      |
|                                              | Zufriedenstellend               | 5                                                   | 2,7%       | 51               | 27,4%      | 130            | 69,9%      |
|                                              | Nicht gut                       | 3 (*)                                               | 3,4%       | 24               | 27,0%      | 62             | 69,7%      |

(\*) Zu geringe Fallzahlen für solide Auswertungen

Deutlich treten auch Zusammenhänge zwischen der Einschätzung der Lebensbedingungen in Innsbruck, der eigenen Lebensqualität und der eigenen Lärmempfindlichkeit hervor:

**Abbildung 73: Anteilige Zufriedenheit mit der Wohnsituation nach Lärmempfindlichkeit (gruppiert)**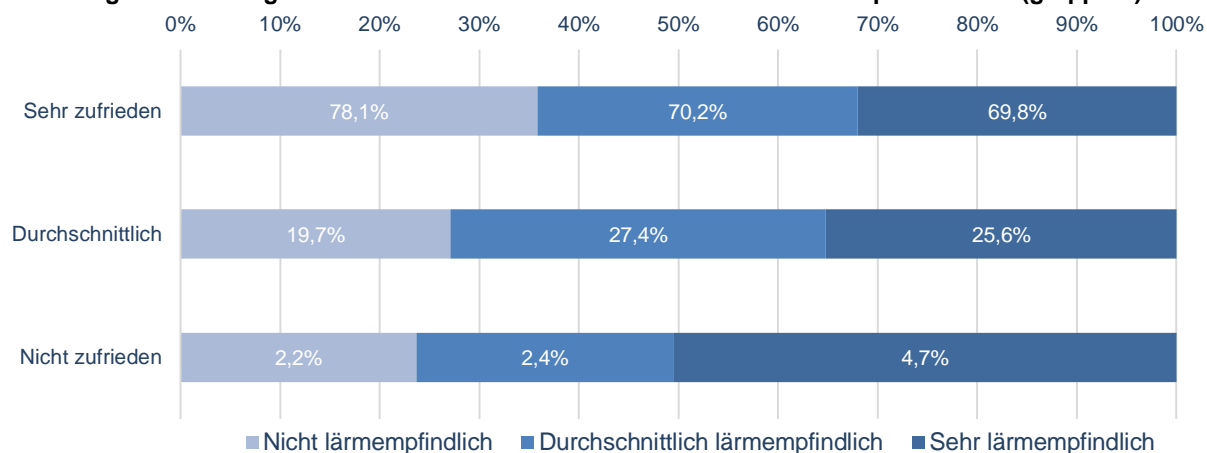

### 3. Wohnsituation und Lärmbelastung

#### 3.1. Straßenverkehrslärmbelastung

Die Zufriedenheit mit der eigenen Wohnsituation ist bei den geringer vom 24h-Straßenverkehrslärm belasteten Befragten deutlich höher als bei den stärker Belasteten und vice versa:

**Abbildung 74: Zufriedenheit mit der Wohnsituation und 24h-Straßenlärmbelastung  $L_{den}$  (gruppiert)**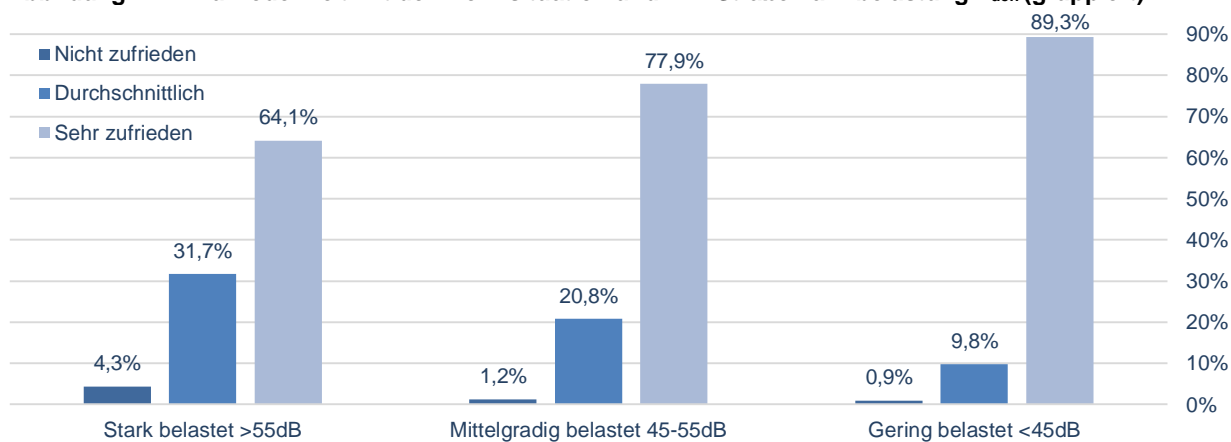

Neben den statistischen Korrelationen ist diese Beziehung auch aus den Mittelwerten nach gegebener Lärmbelastung ersichtlich:

**Tabelle 68: Zufriedenheit mit der Wohnsituation und 24h-Straßenverkehrslärmbelastung  $L_{den}$  in 10-dB Schritten im Mittelwertvergleich**

| Straßenlärm 24h in 10-dB Schritten | Mittelwert | N     | Standardabweichung |
|------------------------------------|------------|-------|--------------------|
| unter 30dB                         | 10,00      | 2 (*) | ,000               |
| 30 bis 40dB                        | 8,62       | 26    | 1,699              |
| 40 bis 50dB                        | 8,87       | 195   | 1,569              |
| 50 bis 60dB                        | 8,01       | 531   | 2,154              |
| über 60dB                          | 7,70       | 276   | 2,233              |
| Insgesamt                          | 8,11       | 1030  | 2,105              |

(\*) zu kleine Fallzahlen für solide Auswertungen

**Abbildung 75: Zufriedenheit mit der Wohnsituation und 24h-Straßenverkehrslärmbelastung  $L_{den}$  in 10-dB Schritten im Mittelwertvergleich**

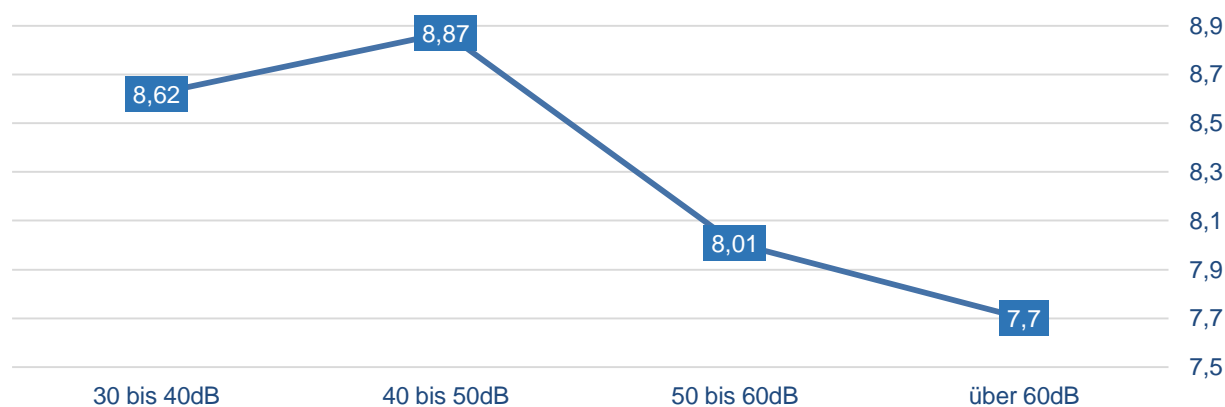

### 3.2. Flugverkehrslärmbelastung

Die 24h-Flugverkehrslärmbelastung zeigt im Gegensatz zum Straßenverkehrslärm (auch rein statistisch) nur geringe Zusammenhänge zum Ausmaß der Zufriedenheit mit der eigenen Wohnsituation:

**Abbildung 76: Zufriedenheit mit der Wohnsituation und 24h-Fluglärmbelastung  $L_{den}$  (gruppiert)**

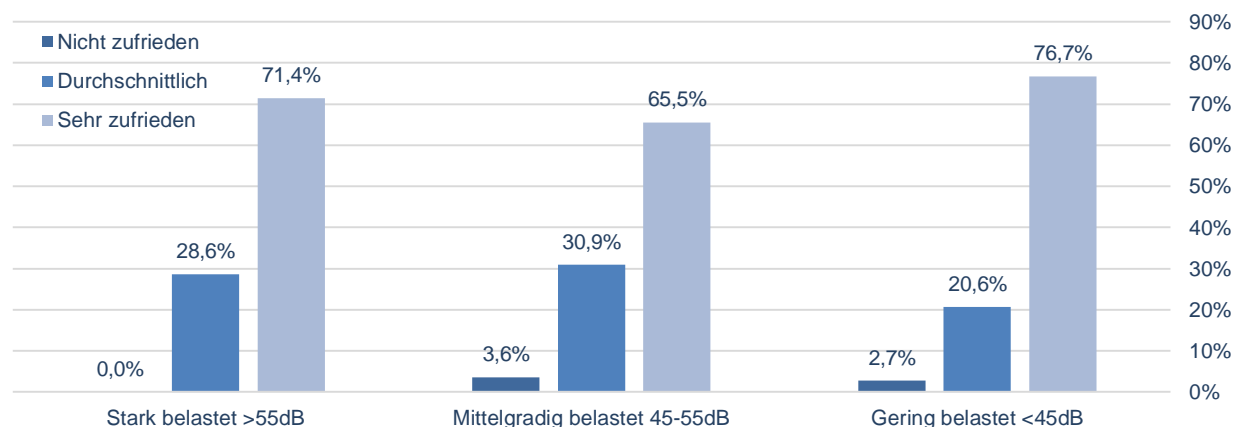

**Tabelle 69: Zufriedenheit mit der Wohnsituation und 24h-Flugverkehrslärmbelastung  $L_{den}$  in 10-dB Schritten im Mittelwertvergleich**

| Fluglärm 24h in 10-dB Schritten | Mittelwert | N    | Standardabweichung |
|---------------------------------|------------|------|--------------------|
| 30 bis 40dB                     | 8,77       | 243  | 1,776              |
| 40 bis 50dB                     | 7,84       | 620  | 2,232              |
| 50 bis 60dB                     | 8,15       | 135  | 1,859              |
| über 60dB                       | 8,28       | 32   | 1,764              |
| Insgesamt                       | 8,11       | 1030 | 2,105              |

### 3.3. Schienenverkehrslärmbelastung

Die 24h-Schienenverkehrslärmbelastung zeigt keine eindeutigen Zusammenhänge zum Ausmaß der Zufriedenheit mit der eigenen Wohnsituation:

**Abbildung 77: Zufriedenheit mit der Wohnsituation und 24h-Schienenlärmbelastung  $L_{den}$  (gruppiert)**

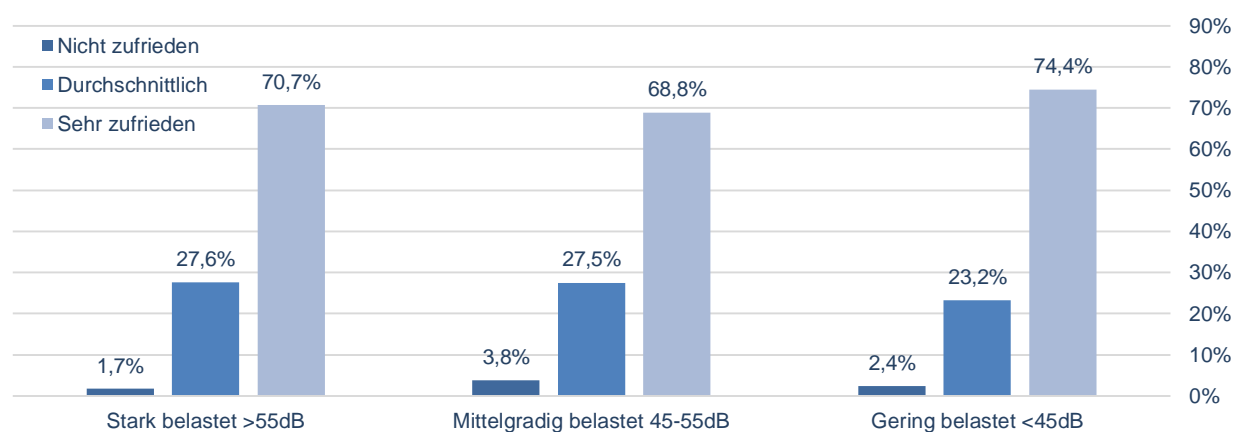

**Tabelle 70: Zufriedenheit mit der Wohnsituation und 24h-Schienenverkehrslärmbelastung  $L_{den}$  in 10-dB Schritten im Mittelwertvergleich**

| Schienenlärm 24h in 10-dB Schritten | Mittelwert | N    | Standardabweichung |
|-------------------------------------|------------|------|--------------------|
| unter 30dB                          | 8,07       | 15   | 2,344              |
| 30 bis 40dB                         | 8,26       | 284  | 2,055              |
| 40 bis 50dB                         | 8,08       | 484  | 2,100              |
| 50 bis 60dB                         | 7,97       | 209  | 2,214              |
| über 60dB                           | 8,16       | 38   | 1,853              |
| Insgesamt                           | 8,11       | 1030 | 2,105              |

## 4. Wohnsituation und nächtliche Lärmbelastung

### 4.1. Straßenverkehrslärmbelastung

Die rein statistischen Beziehungen zwischen dem nächtlichen Straßenverkehrslärm und der Zufriedenheit mit der eigenen Wohnsituation sind nur gering ausgeprägt. Aus den Daten ist ein Schwellenwert bei etwa 40dB nächtlicher Straßenverkehrslärm ersichtlich, ab welchem die Zufriedenheit mit der eigenen Wohnsituation abnimmt. Bis zu diesem Schwellenwert sind keine Auswirkungen des nächtlichen Straßenverkehrslärms auf die Zufriedenheit mit der eigenen Wohnsituation insgesamt erkennbar:

**Abbildung 78: Zufriedenheit mit der Wohnsituation und nächtliche Straßenverkehrslärmbelastung  $L_n$  in 10-dB Schritten im Mittelwertvergleich**

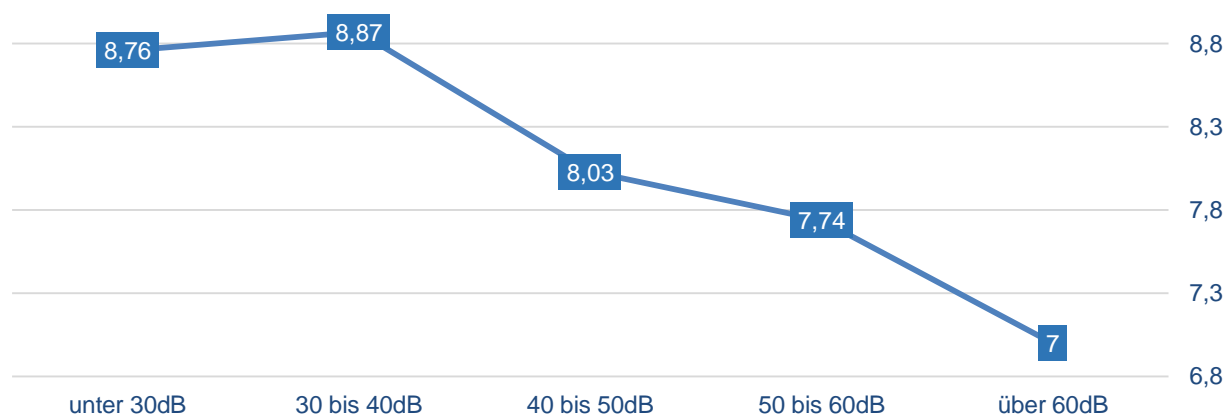

### 4.2. Flugverkehrslärmbelastung

Das Gleiche gilt für die Beziehung zum Flugverkehrslärm in der Nacht, welche nur gering ausgeprägt ist. Neben dem auch schon in der Zusammenschau mit dem 24h-Flugverkehrslärmpegel gering ausgeprägten Zusammenhang, spielt auch die geringe Flugverkehrslärmbelastung in Innsbruck in der Nacht eine Rolle: Keiner der 9711 zu Wohnzwecken benutzte Adresspunkte in Innsbruck verzeichnet eine nächtliche Flugverkehrslärmbelastung  $L_n$  über 50dB:

**Tabelle 71: Zufriedenheit mit der Wohnsituation und nächtliche Flugverkehrslärmbelastung  $L_n$  in 10-dB Schritten im Mittelwertvergleich**

| Fluglärm Nacht in 10-dB Schritten | Mittelwert | N    | Standardabweichung |
|-----------------------------------|------------|------|--------------------|
| unter 30dB                        | 8,32       | 637  | 2,003              |
| 30 bis 40dB                       | 7,81       | 349  | 2,236              |
| 40 bis 50dB                       | 7,50       | 44   | 2,119              |
| Insgesamt                         | 8,11       | 1030 | 2,105              |

### 4.3. Schienenverkehrslärmbelastung

Zwischen dem nächtlichen Schienenverkehrslärm und dem Ausmaß der Zufriedenheit mit der eigenen Wohnsituation besteht statistisch kein eindeutig erkennbarer Zusammenhang. Das lässt sich auch über die Mittelwerte der Zufriedenheit mit der eigenen Wohnsituation in Zusammenschau mit den gestaffelten Lärmbelastungen in 10-dB-Schritten nachvollziehen:

**Tabelle 72: Zufriedenheit mit der Wohnsituation und nächtliche Schienenverkehrslärmbelastung  $L_n$  in 10-dB Schritten im Mittelwertvergleich**

| Schienenlärm Nacht in 10-dB Schritten | Mittelwert | N    | Standardabweichung |
|---------------------------------------|------------|------|--------------------|
| unter 30dB                            | 8,83       | 88   | 1,656              |
| 30 bis 40dB                           | 8,08       | 584  | 2,107              |
| 40 bis 50dB                           | 7,96       | 274  | 2,234              |
| 50 bis 60dB                           | 8,04       | 81   | 1,978              |
| über 60dB                             | 8,67       | 3    | 1,528              |
| Insgesamt                             | 8,11       | 1030 | 2,105              |

## 5. Wohnsituation und Lärmexpositionsempfinden

### 5.1. Verkehrsverursachtes Lärmexpositionsempfinden

Befragte, die sich als stark verkehrslärmexponiert ansehen, sind weniger zufrieden mit ihrer persönlichen Wohnsituation als sich weniger dem Verkehrslärm ausgesetzt sehende Probandinnen und Probanden. Auch statistisch zeigen sich die stärksten Zusammenhänge in Bezug auf die Lärmexposition insgesamt und die Ausgesetzttheit gegenüber Straßenverkehrslärm, geringer ausgeprägte Beziehungen bestehen zum Expositionsempfinden gegenüber dem Schienen- und dem Flugverkehrslärm:

**Abbildung 79: Zufriedenheit mit der Wohnsituation und verkehrsverursachtes Lärmexpositionsempfinden im Mittelwertvergleich**

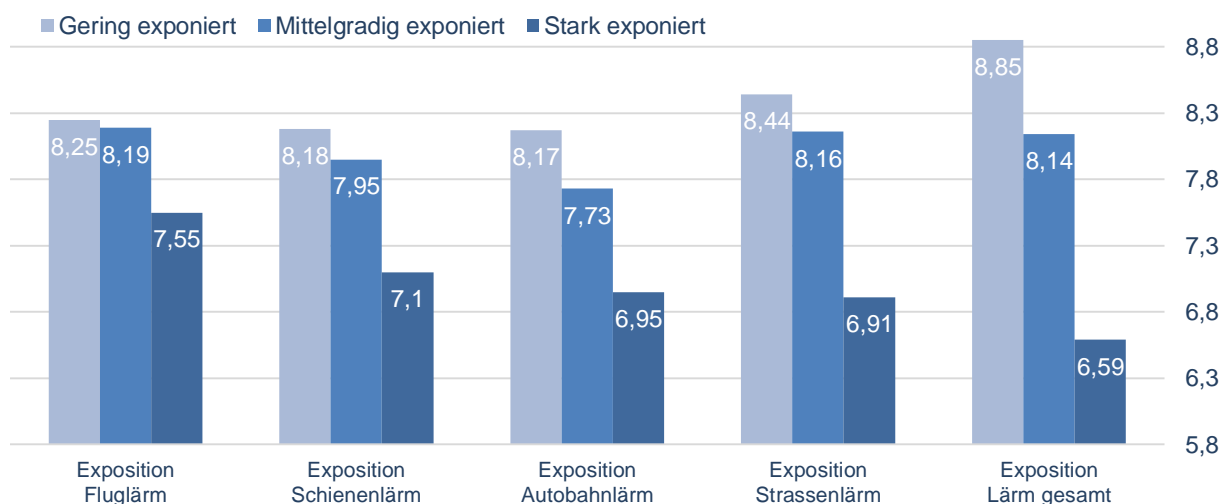

## 5.2. Nichtverkehrsverursachtes Lärmexpositionsempfinden

Sich stark nichtverkehrsverursachtem Lärm ausgesetzt empfindende Befragte schätzen ihre Zufriedenheit mit der eigenen Wohnsituation deutlich schlechter ein, als dies sich weniger ausgesetzt führende Befragte tun. Die Unterschiede treten stärker als beim verkehrsverursachten Lärm zutage und besonders befragte Innsbruckerinnen und Innsbrucker, die sich dem Nachbarschaftslärm oder aber Erschütterungen stark ausgesetzt sehen, beurteilen ihre eigene Wohnsituation insgesamt um mehr als 2 Antwortkategorien schlechter als gering Exponierte angeben. In Zusammenschau mit den Belästigungsreaktionen (siehe das Kapitel: *Belästigung / Störung durch Lärm*) wird ersichtlich, dass Akutbelastungseffekte durch nicht-verkehrsverursachtem Lärm eine deutliche negative Beziehung zu einer Reihe von subjektiven Einschätzungsparametern aufweisen, die in ihrer Ausprägung stärker als beim verkehrsverursachten Lärm zutage treten:

**Abbildung 80: Zufriedenheit mit der Wohnsituation und nichtverkehrsverursachtes Lärmexpositionsempfinden im Mittelwertvergleich**

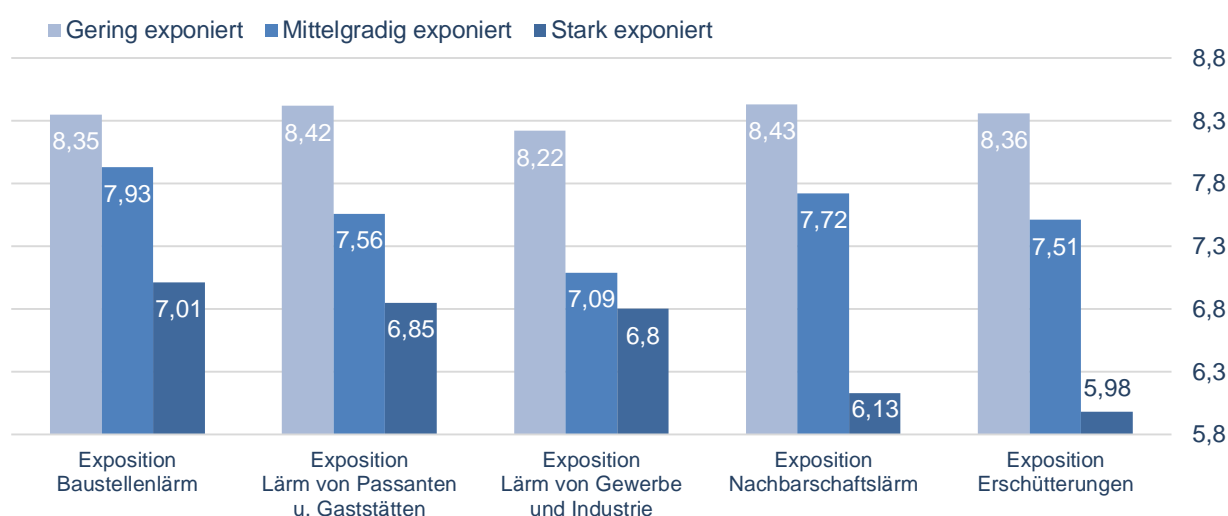

## 6. Wohnsituation und Lärmbelästigung

Das Ausmaß der empfundenen Lärmbelästigung zeigt einen Zusammenhang zur Zufriedenheit mit der eigenen Wohnsituation:

**Abbildung 81: Zufriedenheit mit der Wohnsituation und Lärmbelästigung gesamt im Mittelwertvergleich**

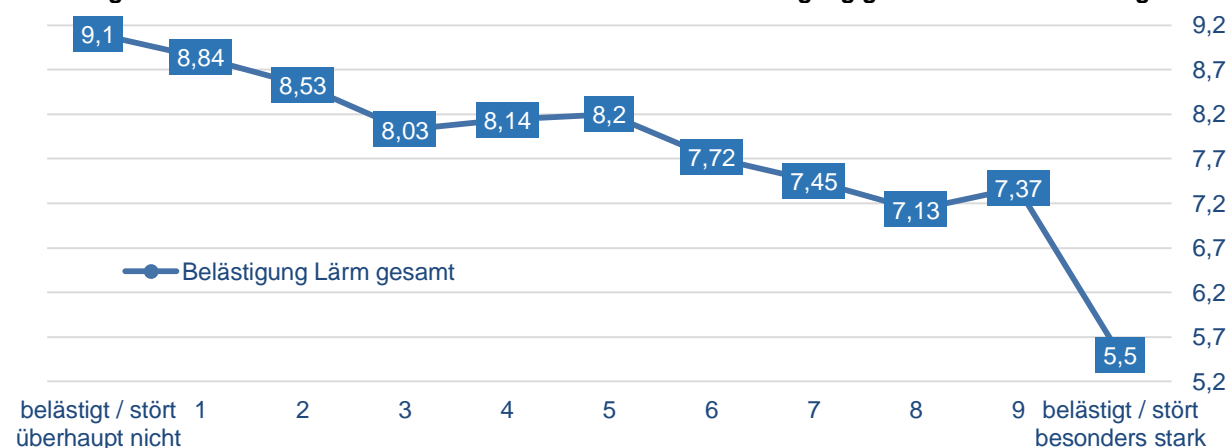



Je stärker die Lärmbelastigung, desto geringer das Ausmaß der Zufriedenheit mit der persönlichen Wohnsituation:

**Tabelle 73: Zufriedenheit mit der Wohnsituation und Lärmbelastigung gesamt im Mittelwertvergleich**

| Belastigung Lärm gesamt         | Mittelwert | N    | Standardabweichung |
|---------------------------------|------------|------|--------------------|
| belästigt/stört überhaupt nicht | 9,10       | 137  | 1,592              |
| 1                               | 8,84       | 80   | 1,513              |
| 2                               | 8,53       | 160  | 1,598              |
| 3                               | 8,03       | 146  | 1,960              |
| 4                               | 8,14       | 90   | 1,758              |
| 5                               | 8,20       | 128  | 1,829              |
| 6                               | 7,72       | 72   | 2,177              |
| 7                               | 7,45       | 92   | 2,160              |
| 8                               | 7,13       | 62   | 2,773              |
| 9                               | 7,37       | 27   | 2,589              |
| belästigt/stört besonders stark | 5,50       | 36   | 3,334              |
| Insgesamt                       | 8,11       | 1030 | 2,105              |

Die Zusammenhänge sind je nach Quelle der Lärmbelastigung unterschiedlich stark ausgeprägt. Am stärksten beim Lärm insgesamt, sowie dem Lärm von Passanten und Gaststätten, Nachbarschaftslärm, Erschütterungen und Straßenverkehrslärm. Am schwächsten bis kaum vorhanden sind statistisch eindeutige Zusammenhänge zwischen der Zufriedenheit mit der eigenen Wohnsituation und Autobahn-, Flug- und Schienenverkehrslärm:

**Abbildung 82: Zufriedenheit mit der Wohnsituation und Lärmbelastigung nach Quelle (gruppiert) im Mittelwertvergleich (aufsteigend sortiert nach Pearsons Rho)**

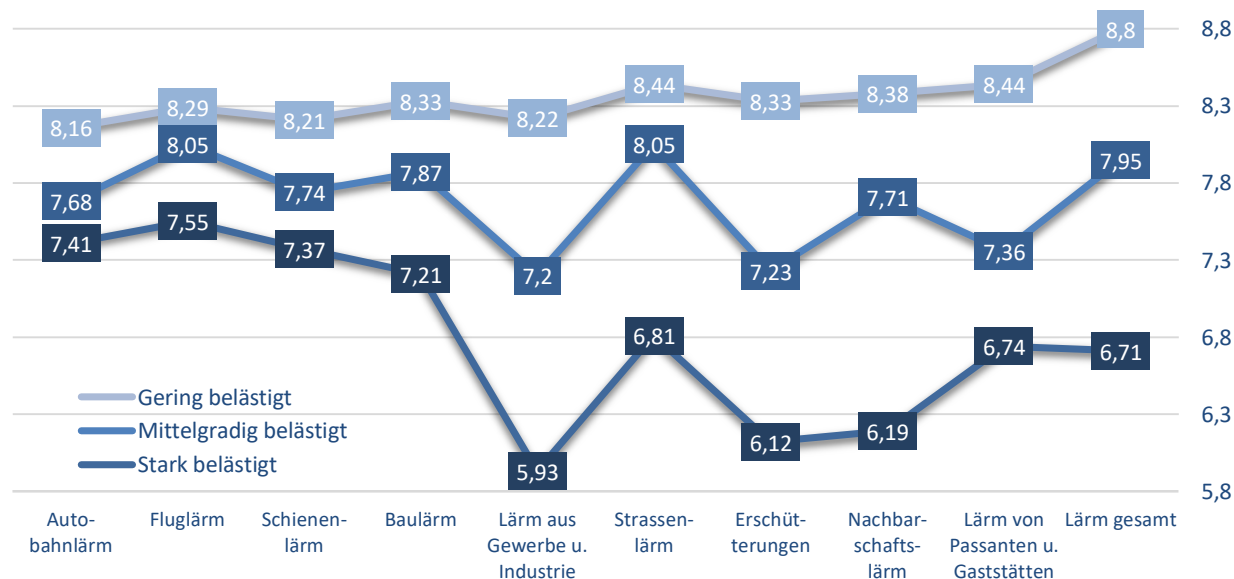

## 7. Wohnsituation und Lärmbelästigung im Schlaf

Für die Beziehungen zum Belästigungsempfinden in der Nacht ist ebenfalls eine sehr vergleichbare Funktion ablesbar. Je geringer das Belästigungsempfinden durch Lärm in der Nacht, desto größer die Zufriedenheit mit der eigenen Wohnsituation.

Allerdings sind die Ergebnisse für die Extremgruppe der sich stark vom Lärm nach einzelnen Quellen belästigt fühlenden Befragten aufgrund der geringen Fallzahlen weiter streuend und weniger solide:

**Abbildung 83: Zufriedenheit mit der Wohnsituation und Lärmbelästigung in der Nacht nach Quelle (gruppiert) im Mittelwertvergleich (aufsteigend sortiert nach Pearsons Rho)**

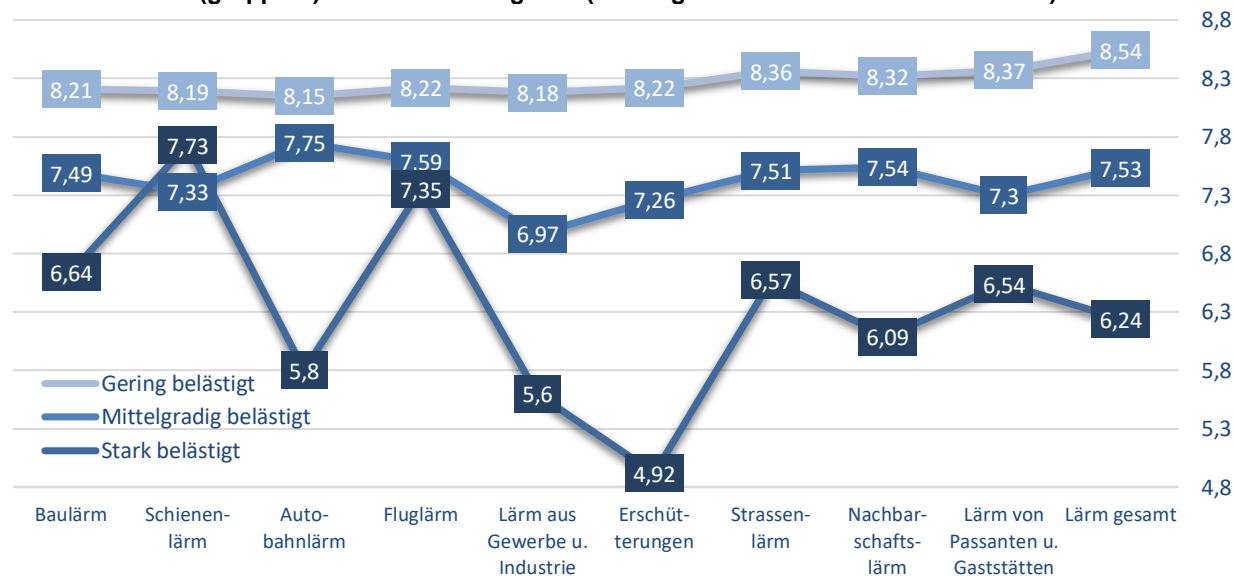

# Gesundheitszustand

## 1. Gesundheitszustand im Überblick

Knapp drei Viertel aller Befragten schätzen ihren Gesundheitszustand als *gut* bzw. *sehr gut* ein, 8,6% als *weniger gut* bzw. *schlecht*. 2 Befragte machen keine Angaben:

**Abbildung 84: Einschätzung des eigenen Gesundheitszustandes in Prozent**

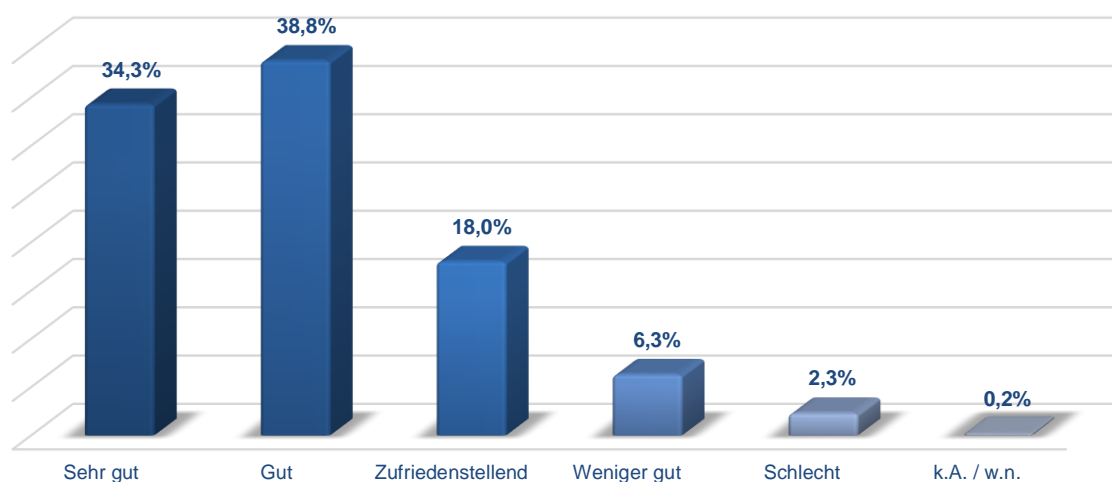

**Tabelle 74: Einschätzung des eigenen Gesundheitszustandes gruppiert**

|        |                   | Häufigkeit | Gültige Prozente | Kumulierte Prozente |
|--------|-------------------|------------|------------------|---------------------|
|        | Gut               | 754        | 73,1             | 73,1                |
|        | Zufriedenstellend | 186        | 18,0             | 91,2                |
| Gültig | Nicht gut         | 89         | 8,6              | 99,8                |
|        | w.n. / k.A.       | 2          | ,2               | 100,0               |
|        | Gesamt            | 1031       | 100,0            |                     |

## 2. Gesundheitszustand und ausgewählte Parameter

Den größten Zusammenhang zur Einschätzung des eigenen Gesundheitszustandes zeigt erwartungsgemäß das Alter der Befragten.

Männer schätzen ihren eigenen Gesundheitszustand geringfügig besser ein als Frauen.

Die Selbsteinschätzung der eigenen Lärmempfindlichkeit und des eigenen Gesundheitszustandes stehen nur geringfügig in Beziehung zueinander. Gleiches gilt für die Einschätzung des Ausmaßes negativer Auswirkungen von Lärm auf die Gesundheit.

Ausgeprägt ist hingegen die Beziehung mit der Beurteilung der eigenen Lebensqualität: Befragte mit schlechtem selbstreferenzierten Gesundheitszustand bewerten auch ihr Lebensqualität schlechter als Befragte mit gutem Gesundheitszustand und vice versa:

**Tabelle 75: Einschätzung des eigenen Gesundheitszustandes (gruppiert) und ausgewählte Variablen**

|                                                        |                           | Güte eigener Gesundheitszustand gruppiert |            |                   |            |           |            |
|--------------------------------------------------------|---------------------------|-------------------------------------------|------------|-------------------|------------|-----------|------------|
|                                                        |                           | Gut                                       |            | Zufriedenstellend |            | Nicht gut |            |
|                                                        |                           | Anzahl                                    | Zeilen (%) | Anzahl            | Zeilen (%) | Anzahl    | Zeilen (%) |
| <b>Geschlecht</b>                                      | weiblich                  | 388                                       | 72,0%      | 97                | 18,0%      | 54        | 10,0%      |
|                                                        | männlich                  | 366                                       | 74,7%      | 89                | 18,2%      | 35        | 7,1%       |
| <b>Altersgruppen</b>                                   | 18 bis 40 Jahre           | 377                                       | 85,7%      | 51                | 11,6%      | 12        | 2,7%       |
|                                                        | 41 bis 60 Jahre           | 221                                       | 69,9%      | 56                | 17,7%      | 39        | 12,3%      |
|                                                        | über 60 Jahre             | 156                                       | 57,1%      | 79                | 28,9%      | 38        | 13,9%      |
| <b>Bildungsschicht</b>                                 | Primärer Schulabschluss   | 54                                        | 55,1%      | 28                | 28,6%      | 16        | 16,3%      |
|                                                        | Sekundärer Schulabschluss | 375                                       | 69,4%      | 109               | 20,2%      | 56        | 10,4%      |
|                                                        | Tertiärer Schulabschluss  | 323                                       | 83,2%      | 48                | 12,4%      | 17        | 4,4%       |
| <b>Negative Auswirkung von Lärm auf die Gesundheit</b> | Wenig                     | 160                                       | 73,7%      | 42                | 19,4%      | 15        | 6,9%       |
|                                                        | Stark                     | 573                                       | 73,6%      | 138               | 17,7%      | 68        | 8,7%       |
| <b>Lebensqualität</b>                                  | Nicht gut (*)             | 1                                         | 11,1%      | 2                 | 22,2%      | 6         | 66,7%      |
|                                                        | Durchschnittlich          | 177                                       | 61,0%      | 71                | 24,5%      | 42        | 14,5%      |
|                                                        | Sehr gut                  | 572                                       | 78,9%      | 113               | 15,6%      | 40        | 5,5%       |
| <b>Lärmempfindlichkeit</b>                             | Nicht lärmempfindlich     | 206                                       | 74,9%      | 46                | 16,7%      | 23        | 8,4%       |
|                                                        | Durchschnittlich          | 426                                       | 73,2%      | 112               | 19,2%      | 44        | 7,6%       |
|                                                        | Sehr lärmempfindlich      | 122                                       | 70,9%      | 28                | 16,3%      | 22        | 12,8%      |

\* zu kleine Fallzahlen für solide Auswertungen

Auffällig ist die Zusammenschau Gesundheitszustand und höchster erreichter Bildungsabschluss: Befragte mit Pflichtschulabschluss gehen von einem deutlich schlechteren eigenen Gesundheitszustand aus als Befragte mit sekundärem Bildungsabschluss und diese unterscheiden sich wiederum ebenso deutlich von befragten Akademikerinnen und Akademikern. Diese Unterschiede bleiben auch altersbereinigt erhalten und sind besonders in den beiden höheren Altersklassen sehr ausgeprägt:

**Abbildung 85: Einschätzung des eigenen Gesundheitszustandes und höchster erreichter Schulabschluss nach Altersgruppen (gruppiert) im Mittelwertvergleich**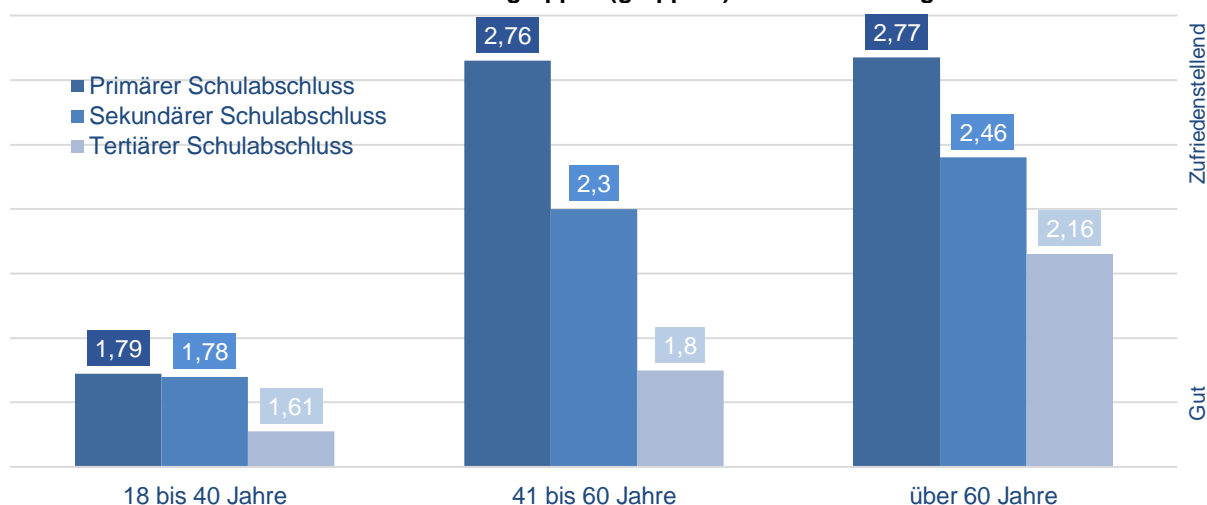

### 3. Gesundheitszustand und Lärmbelastung

Die Selbsteinschätzung des persönlichen Gesundheitszustandes weist einen Bezug zum Straßenverkehrslärm auf, zeigt aber keine eindeutige Beziehung zur tatsächlich vorhandenen Gesamtlärmbelastung im Wohnumfeld der Befragten:

**Tabelle 76: Bivariate Korrelation zu Gesundheitszustand und 24h-Lärmbelastung  $L_{den}$  nach Quelle**

|                                 |                          | Straßenlärm 24h | Schienenlärm 24h | Fluglärm 24h |
|---------------------------------|--------------------------|-----------------|------------------|--------------|
| Güte eigener Gesundheitszustand | Korrelation nach Pearson | ,065*           | ,028             | -,016        |
|                                 | Signifikanz (2-seitig)   | ,037            | ,363             | ,617         |
|                                 | N                        | 1029            | 1029             | 1029         |

\*. Die Korrelation ist auf dem Niveau von 0,05 (2-seitig) signifikant.

### 4. Gesundheitszustand und Lärmexpositionsempfinden

Befragte mit schlechterem selbstreferenzierten Gesundheitszustand empfinden sich geringfügig stärker dem Lärm in ihrem Wohnumfeld ausgesetzt, als Innsbruckerinnen und Innsbrucker mit gutem persönlichen Gesundheitszustand und umgekehrt. Dieser Effekt ist nahezu unabhängig von der Lärmquelle vorhanden:

**Tabelle 77: Gesundheitszustand und Lärmexpositionsempfinden nach Quelle (gruppiert)**

|                                          |                        | Güte eigener Gesundheitszustand gruppiert |            |                   |            |           |            |
|------------------------------------------|------------------------|-------------------------------------------|------------|-------------------|------------|-----------|------------|
|                                          |                        | Gut                                       |            | Zufriedenstellend |            | Nicht gut |            |
|                                          |                        | Anzahl                                    | Zeilen (%) | Anzahl            | Zeilen (%) | Anzahl    | Zeilen (%) |
| <b>Ausgesetztheit Lärm gesamt</b>        | Gering exponiert       | 197                                       | 75,8%      | 43                | 16,5%      | 20        | 7,7%       |
|                                          | Mittelgradig exponiert | 453                                       | 72,0%      | 123               | 19,6%      | 53        | 8,4%       |
|                                          | Stark exponiert        | 104                                       | 74,3%      | 20                | 14,3%      | 16        | 11,4%      |
| <b>Ausgesetztheit Fluglärm</b>           | Gering exponiert       | 298                                       | 74,9%      | 75                | 18,8%      | 25        | 6,3%       |
|                                          | Mittelgradig exponiert | 342                                       | 73,4%      | 79                | 17,0%      | 45        | 9,7%       |
|                                          | Stark exponiert        | 114                                       | 69,1%      | 32                | 19,4%      | 19        | 11,5%      |
| <b>Ausgesetztheit Strassenlärm</b>       | Gering exponiert       | 323                                       | 75,5%      | 75                | 17,5%      | 30        | 7,0%       |
|                                          | Mittelgradig exponiert | 338                                       | 72,8%      | 85                | 18,3%      | 41        | 8,8%       |
|                                          | Stark exponiert        | 93                                        | 67,9%      | 26                | 19,0%      | 18        | 13,1%      |
| <b>Ausgesetztheit Baulärm</b>            | Gering exponiert       | 501                                       | 74,7%      | 122               | 18,2%      | 48        | 7,2%       |
|                                          | Mittelgradig exponiert | 171                                       | 68,1%      | 52                | 20,7%      | 28        | 11,2%      |
|                                          | Stark exponiert        | 82                                        | 76,6%      | 12                | 11,2%      | 13        | 12,1%      |
| <b>Ausgesetztheit Nachbarschaftslärm</b> | Gering exponiert       | 518                                       | 73,1%      | 130               | 18,3%      | 61        | 8,6%       |
|                                          | Mittelgradig exponiert | 196                                       | 76,3%      | 44                | 17,1%      | 17        | 6,6%       |
|                                          | Stark exponiert        | 40                                        | 63,5%      | 12                | 19,0%      | 11        | 17,5%      |
| <b>Ausgesetztheit Lärm von Passanten</b> | Gering exponiert       | 531                                       | 74,7%      | 122               | 17,2%      | 58        | 8,2%       |
|                                          | Mittelgradig exponiert | 184                                       | 71,6%      | 49                | 19,1%      | 24        | 9,3%       |

|                                       |                        |     |       |       |       |       |       |
|---------------------------------------|------------------------|-----|-------|-------|-------|-------|-------|
| <b>u. Gaststätten</b>                 | Stark exponiert        | 39  | 63,9% | 15    | 24,6% | 7     | 11,5% |
| <b>Ausgesetztheit</b>                 | Gering exponiert       | 595 | 74,0% | 148   | 18,4% | 61    | 7,6%  |
| <b>Erschütterungen</b>                | Mittelgradig exponiert | 134 | 73,2% | 30    | 16,4% | 19    | 10,4% |
|                                       | Stark exponiert        | 25  | 59,5% | 8     | 19,0% | 9     | 21,4% |
| <b>Ausgesetztheit</b>                 | Gering exponiert       | 609 | 72,2% | 163   | 19,3% | 71    | 8,4%  |
| <b>Schienenlärm</b>                   | Mittelgradig exponiert | 121 | 77,1% | 19    | 12,1% | 17    | 10,8% |
|                                       | Stark exponiert        | 24  | 82,8% | 4     | 13,8% | 1 (*) | 3,4%  |
| <b>Ausgesetztheit</b>                 | Gering exponiert       | 687 | 74,0% | 165   | 17,8% | 77    | 8,3%  |
| <b>Autobahnlärm</b>                   | Mittelgradig exponiert | 53  | 65,4% | 17    | 21,0% | 11    | 13,6% |
|                                       | Stark exponiert        | 14  | 73,7% | 4 (*) | 21,1% | 1 (*) | 5,3%  |
| <b>Ausgesetztheit</b>                 | Gering exponiert       | 686 | 73,8% | 161   | 17,3% | 83    | 8,9%  |
| <b>Lärm von Gewerbe und Industrie</b> | Mittelgradig exponiert | 53  | 67,1% | 21    | 26,6% | 5     | 6,3%  |
|                                       | Stark exponiert        | 15  | 75,0% | 4 (*) | 20,0% | 1 (*) | 5,0%  |

\* zu kleine Fallzahlen für solide Auswertungen

## 5. Gesundheitszustand und Lärmbelästigung

Zwischen der Einschätzung des eigenen Gesundheitszustandes und dem Ausmaß der Lärmbelästigung besteht nur ein sehr geringer direkter Zusammenhang. Im Vergleich der Extremgruppen lassen sich jedoch Unterschiede ausmachen:

**Abbildung 86: Gesundheitszustand und Lärmbelästigung nach Quelle (gruppiert) im Mittelwertvergleich (aufsteigend sortiert nach Extremwertdifferenz)**

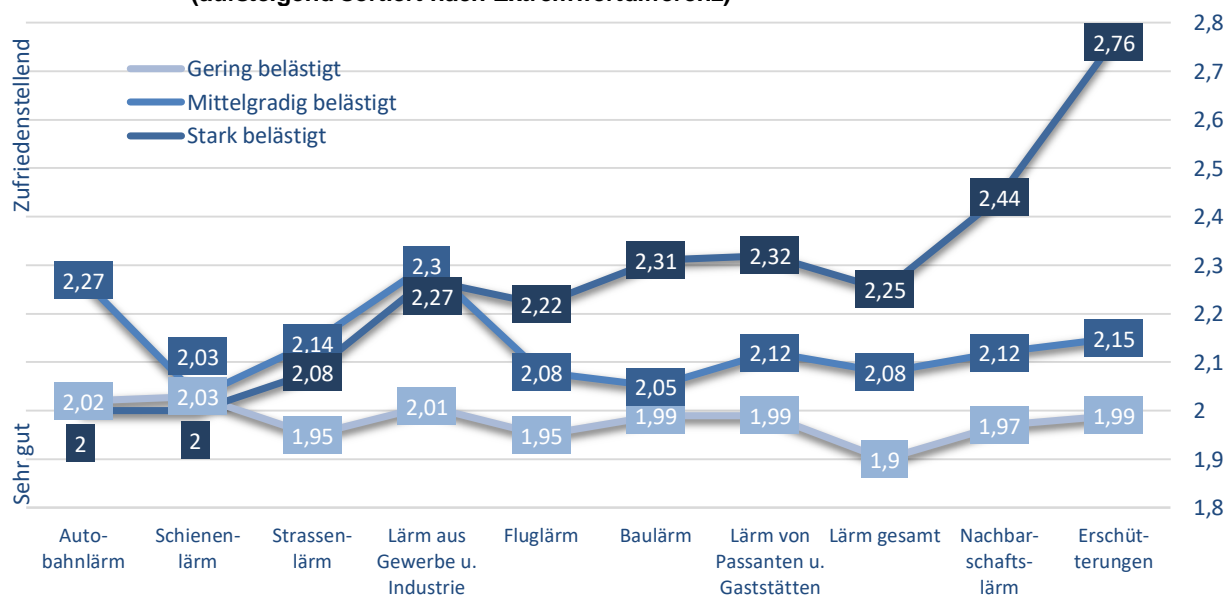

## 6. Gesundheitszustand und Belästigung durch Lärm im Schlaf

Die Einschätzung des eigenen Gesundheitszustandes und die Belästigung durch Lärm im Schlaf zeigen auch differenziert nach einzelnen Belästigungsquellen keine ausgeprägten Beziehungen zueinander.

# Lebensqualität

## 1. Lebensqualität im Überblick

Genau 1% aller Befragten beurteilt die eigene Lebensqualität in den drei untersten Antwortkategorien und damit als schlecht, über 70% sind hingegen der Meinung, dass die persönliche Lebensqualität sehr hoch ist und antworten in den drei obersten Antwortkategorien. 6 Befragte machen keine Angaben:

**Abbildung 87: Einschätzung der persönlichen Lebensqualität in Prozent**

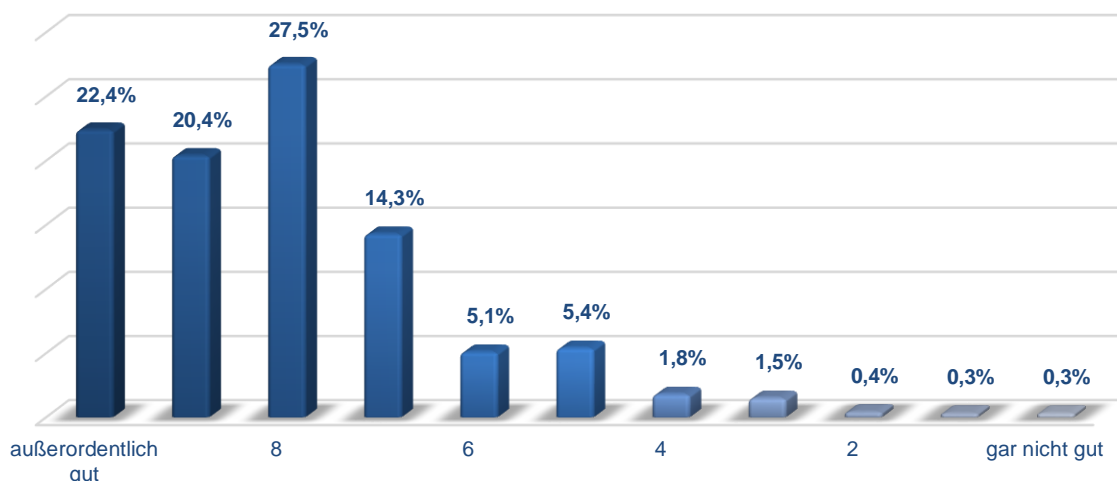

Der arithmetische Mittelwert der Antworten liegt auf der 11-er Skala von *gar nicht gut* bis *außerordentlich gut* bei 8,03 (Standardfehler 0,055), das entspricht einem durchschnittlichen Ausmaß der Einschätzung der persönlichen Lebensqualität der befragten Innsbruckerinnen und Innsbrucker von 88,3% vom Maximalwert.

**Tabelle 78: Einschätzung der persönlichen Lebensqualität gruppiert**

|        |                  | Häufigkeit | Gültige Prozente | Kumulierte Prozente |
|--------|------------------|------------|------------------|---------------------|
| Gültig | Nicht gut        | 10         | 1,0              | 1,0                 |
|        | Durchschnittlich | 290        | 28,1             | 29,1                |
|        | Sehr gut         | 725        | 70,3             | 99,4                |
|        | w.n. / k.A.      | 6          | ,6               | 100,0               |
|        | Gesamt           | 1031       | 100,0            |                     |

## 2. Lebensqualität und ausgewählte Parameter

Frauen schätzen ihre persönliche Lebensqualität etwas höher als Männer ein.

Die Einschätzung der eigenen Lebensqualität zeigt nur eine geringe Beziehung zum Alter der Befragten:



**Tabelle 79: Einschätzung der eigenen Lebensqualität (gruppiert) und ausgewählte Variablen**

|                                                                       |                           | Güte eigene Lebensqualität gruppiert |            |                  |            |          |            |
|-----------------------------------------------------------------------|---------------------------|--------------------------------------|------------|------------------|------------|----------|------------|
|                                                                       |                           | Nicht gut (*)                        |            | Durchschnittlich |            | Sehr gut |            |
|                                                                       |                           | Anzahl                               | Zeilen (%) | Anzahl           | Zeilen (%) | Anzahl   | Zeilen (%) |
| <b>Geschlecht</b>                                                     | weiblich                  | 8                                    | 1,5%       | 141              | 26,2%      | 390      | 72,4%      |
|                                                                       | männlich                  | 2                                    | 0,4%       | 149              | 30,7%      | 335      | 68,9%      |
| <b>Altersgruppen</b>                                                  | 18 bis 40 Jahre           | 2                                    | 0,5%       | 119              | 27,1%      | 318      | 72,4%      |
|                                                                       | 41 bis 60 Jahre           | 6                                    | 1,9%       | 89               | 28,4%      | 218      | 69,6%      |
|                                                                       | über 60 Jahre             | 2                                    | 0,7%       | 82               | 30,0%      | 189      | 69,2%      |
| <b>Bildungsschicht</b>                                                | Primärer Schulabschluss   | 2                                    | 2,1%       | 40               | 41,7%      | 54       | 56,3%      |
|                                                                       | Sekundärer Schulabschluss | 5                                    | 0,9%       | 171              | 31,7%      | 364      | 67,4%      |
|                                                                       | Tertiärer Schulabschluss  | 3                                    | 0,8%       | 78               | 20,2%      | 305      | 79,0%      |
| <b>Gesundheitszustand</b>                                             | Gut                       | 1                                    | 0,1%       | 177              | 23,6%      | 572      | 76,3%      |
|                                                                       | Zufriedenstellend         | 2                                    | 1,1%       | 71               | 38,2%      | 113      | 60,8%      |
|                                                                       | Nicht gut                 | 6                                    | 6,8%       | 42               | 47,7%      | 40       | 45,5%      |
| <b>Lärmempfindlichkeit</b>                                            | Nicht lärmempfindlich     | 1                                    | 0,4%       | 67               | 24,5%      | 206      | 75,2%      |
|                                                                       | Durchschnittlich          | 6                                    | 1,0%       | 174              | 30,0%      | 400      | 69,0%      |
|                                                                       | Sehr lärmempfindlich      | 3                                    | 1,8%       | 49               | 28,7%      | 119      | 69,6%      |
| <b>Lautheit Innsbruck im Vergleich zu anderen Städten Österreichs</b> | Ruhiger                   | 2                                    | 0,7%       | 73               | 25,0%      | 217      | 74,3%      |
|                                                                       | Gleich                    | 6                                    | 1,1%       | 139              | 25,5%      | 401      | 73,4%      |
|                                                                       | Lauter                    | 2                                    | 1,1%       | 73               | 42,0%      | 99       | 56,9%      |

\* zu kleine Fallzahlen für solide Auswertungen

Knapp 80% der Befragten mit tertiärem höchsten erreichten Schulabschluss schätzen ihre eigene Lebensqualität als sehr gut ein, bei den Probandinnen und Probanden aus der sekundären Bildungsschicht sinkt dieser Anteil auf knapp über zwei Drittel und bei Befragten mit Pflichtschulabschluss beurteilen nur mehr 56% ihre persönliche Lebensqualität als sehr gut:

**Abbildung 88: Einschätzung der Lebensqualität und höchster erreichter Schulabschluss (gruppiert)**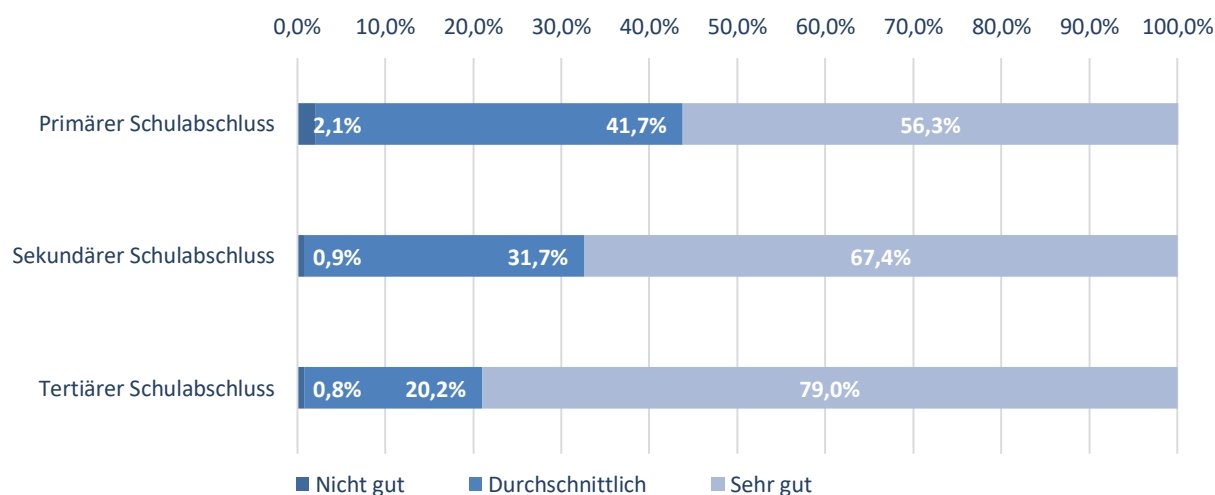

Auch altersbereinigt bleiben diese Unterschiede annähernd bestehen.

Noch stärker zeigen sich Zusammenhänge in Zusammenschau mit dem selbstreferenzierten Gesundheitszustand der Befragten, weniger deutlich sind hingegen die Verbindungen zur Lärmempfindlichkeit.

Befragte Innsbruckerinnen und Innsbrucker, welche der Meinung sind, dass es in Innsbruck im Vergleich zu anderen Städten in Österreich lauter ist, beurteilen auch ihre persönliche Lebensqualität schlechter als Probandinnen und Probanden, die glauben, dass es in Innsbruck insgesamt leiser oder gleich laut wie in vergleichbaren österreichischen Städten ist.

### 3. Lebensqualität und Lärmbelastung

Die Einschätzung der Güte der eigenen Lebensqualität zeigt nur geringfügige Beziehungen zur tatsächlich vorhandenen Lärmbelastung im Wohnumfeld der Befragten:

**Tabelle 80: Bivariate Korrelation zu Lebensqualität und 24h-Lärmbelastung  $L_{den}$  nach Quelle**

|                               |                          | Straßenlärm 24h | Schienenlärm 24h | Fluglärm 24h |
|-------------------------------|--------------------------|-----------------|------------------|--------------|
| Güte eigene<br>Lebensqualität | Korrelation nach Pearson | -,181**         | -,045            | -,087**      |
|                               | Signifikanz (2-seitig)   | ,000            | ,149             | ,006         |
|                               | N                        | 1025            | 1025             | 1025         |

\*\* Die Korrelation ist auf dem Niveau von 0,01 (2-seitig) signifikant.

Eine (allerdings statistisch nur gering ausgeprägte) Beziehung besteht zwischen der Einschätzung der eigenen Lebensqualität und der nächtlichen Straßenlärmbelastung. Mit steigenden nächtlichen Straßenlärmpegeln sinkt die Einschätzung der eigenen Lebensqualität deutlich:

**Abbildung 89: Einschätzung der eigenen Lebensqualität und nächtliche Straßenverkehrslärmbelastung  $L_n$  in 10dB-Schritten im Mittelwertvergleich**

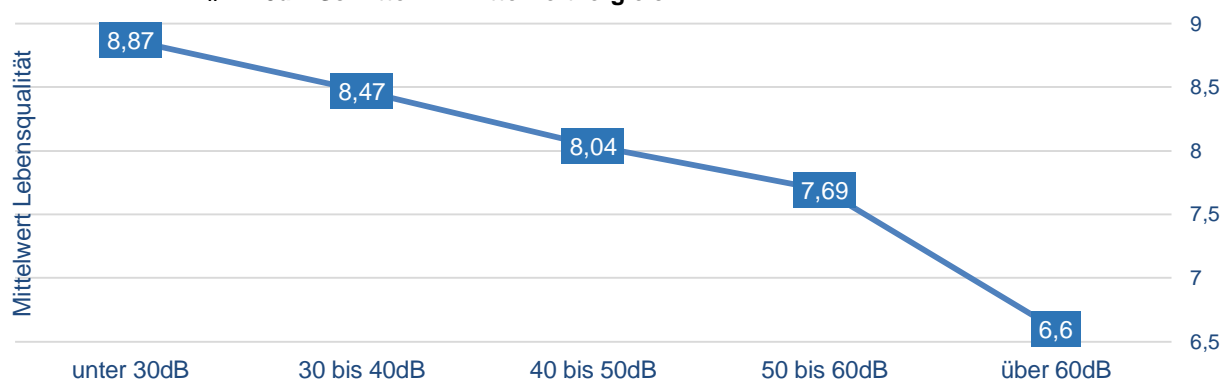

## 4. Lebensqualität und Lärmexpositionsempfinden

Ausgeprägter als zur tatsächlich gegebenen Lärmbelastung zeigen sich Zusammenhänge zur empfundenen Ausgesetzttheit gegenüber Lärm. Vor allem in der Zusammenschau der Einschätzung der eigenen Lebensqualität mit dem Expositionsempfinden gegenüber dem Lärm insgesamt, dem Straßenverkehrslärm und dem Nachbarschaftslärm zeigen sich Bezüge:

**Abbildung 90: Lebensqualität und Expositionsempfinden Lärm insgesamt im Mittelwertvergleich**

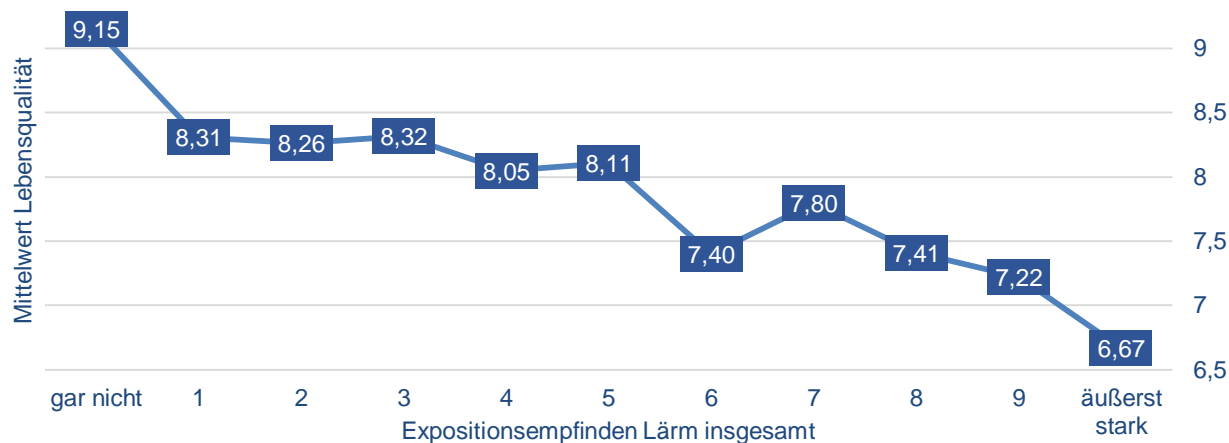

Je stärker sich Befragte lärmexponiert fühlen, desto geringer schätzen sie ihre persönliche Lebensqualität ein:

**Tabelle 81: Lebensqualität und Lärmexpositionsempfinden nach Quelle (gruppiert)**

|                                           |                        | Güte eigene Lebensqualität gruppiert |            |                  |            |          |            |
|-------------------------------------------|------------------------|--------------------------------------|------------|------------------|------------|----------|------------|
|                                           |                        | Nicht gut (*)                        |            | Durchschnittlich |            | Sehr gut |            |
|                                           |                        | Anzahl (*)                           | Zeilen (%) | Anzahl           | Zeilen (%) | Anzahl   | Zeilen (%) |
| <b>Ausgesetzttheit Lärm gesamt</b>        | Gering exponiert       | 2                                    | 0,8%       | 47               | 18,1%      | 210      | 81,1%      |
|                                           | Mittelgradig exponiert | 3                                    | 0,5%       | 186              | 29,7%      | 437      | 69,8%      |
|                                           | Stark exponiert        | 5                                    | 3,6%       | 57               | 40,7%      | 78       | 55,7%      |
| <b>Ausgesetzttheit Fluglärm</b>           | Gering exponiert       | 2                                    | 0,5%       | 103              | 25,9%      | 292      | 73,6%      |
|                                           | Mittelgradig exponiert | 4                                    | 0,9%       | 135              | 29,1%      | 325      | 70,0%      |
|                                           | Stark exponiert        | 4                                    | 2,4%       | 52               | 31,7%      | 108      | 65,9%      |
| <b>Ausgesetzttheit Strassenlärm</b>       | Gering exponiert       | 5                                    | 1,2%       | 110              | 25,9%      | 310      | 72,9%      |
|                                           | Mittelgradig exponiert | 2                                    | 0,4%       | 124              | 26,7%      | 338      | 72,8%      |
|                                           | Stark exponiert        | 3                                    | 2,2%       | 56               | 41,2%      | 77       | 56,6%      |
| <b>Ausgesetzttheit Baulärm</b>            | Gering exponiert       | 4                                    | 0,6%       | 170              | 25,4%      | 495      | 74,0%      |
|                                           | Mittelgradig exponiert | 2                                    | 0,8%       | 83               | 33,2%      | 165      | 66,0%      |
|                                           | Stark exponiert        | 4                                    | 3,8%       | 37               | 34,9%      | 65       | 61,3%      |
| <b>Ausgesetzttheit Nachbarschaftslärm</b> | Gering exponiert       | 7                                    | 1,0%       | 174              | 24,6%      | 526      | 74,4%      |
|                                           | Mittelgradig exponiert | 0                                    | 0,0%       | 82               | 32,0%      | 174      | 68,0%      |
|                                           | Stark exponiert        | 3                                    | 4,8%       | 34               | 54,8%      | 25       | 40,3%      |
| <b>Ausgesetzttheit Lärm von Passanten</b> | Gering exponiert       | 6                                    | 0,8%       | 175              | 24,7%      | 527      | 74,4%      |
|                                           | Mittelgradig exponiert | 1                                    | 0,4%       | 97               | 37,9%      | 158      | 61,7%      |

|                                       |                        |    |      |     |       |     |       |
|---------------------------------------|------------------------|----|------|-----|-------|-----|-------|
| <b>u. Gaststätten</b>                 | Stark exponiert        | 3  | 4,9% | 18  | 29,5% | 40  | 65,6% |
| <b>Ausgesetztheit</b>                 | Gering exponiert       | 4  | 0,5% | 204 | 25,5% | 593 | 74,0% |
| <b>Erschütterungen</b>                | Mittelgradig exponiert | 4  | 2,2% | 70  | 38,5% | 108 | 59,3% |
|                                       | Stark exponiert        | 2  | 4,8% | 16  | 38,1% | 24  | 57,1% |
| <b>Ausgesetztheit</b>                 | Gering exponiert       | 10 | 1,2% | 232 | 27,7% | 597 | 71,2% |
| <b>Schienenlärm</b>                   | Mittelgradig exponiert | 0  | 0,0% | 48  | 30,6% | 109 | 69,4% |
|                                       | Stark exponiert        | 0  | 0,0% | 10  | 34,5% | 19  | 65,5% |
| <b>Ausgesetztheit</b>                 | Gering exponiert       | 8  | 0,9% | 258 | 27,9% | 659 | 71,2% |
| <b>Autobahnlärm</b>                   | Mittelgradig exponiert | 2  | 2,5% | 24  | 29,6% | 55  | 67,9% |
|                                       | Stark exponiert        | 0  | 0,0% | 8   | 42,1% | 11  | 57,9% |
| <b>Ausgesetztheit</b>                 | Gering exponiert       | 8  | 0,9% | 251 | 27,1% | 667 | 72,0% |
| <b>Lärm von Gewerbe und Industrie</b> | Mittelgradig exponiert | 1  | 1,3% | 34  | 43,0% | 44  | 55,7% |
|                                       | Stark exponiert        | 1  | 5,0% | 5   | 25,0% | 14  | 70,0% |

\* zu kleine Fallzahlen für solide Auswertungen

## 5. Lebensqualität und Lärmbelästigung

Deutlich manifestieren sich die Unterschiede in der Beurteilung der eigenen Lebensqualität in Kombination mit dem Ausmaß der Lärmbelästigung:

**Abbildung 91: Lebensqualität und Belästigung durch Lärm insgesamt im Mittelwertvergleich**

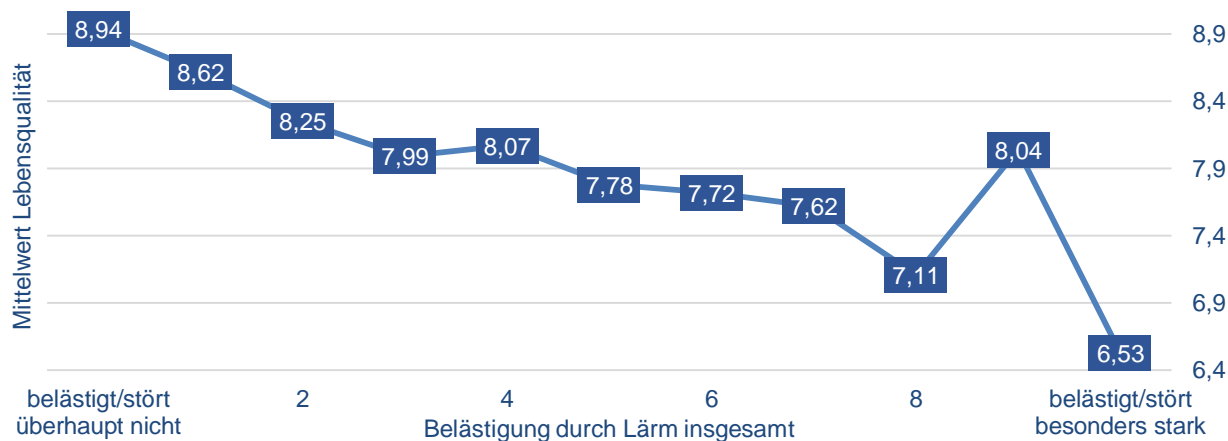

Anm.: Bei Antwortkategorie 9 zeigt sich ein Ausreißer (Standardabweichung 2,128)

Bei der Zusammenschau der Beurteilung der eigenen Lebensqualität und der Lärmbelästigung fällt auf, dass vor allem bei der Belästigung durch Schienenverkehrs- und Autobahnlärm die beiden Extremgruppen der Gering- und der Starkbelästigten in der Beurteilung ihrer persönlichen Lebensqualität nicht sehr weit auseinanderliegen. Sehr deutlich unterscheiden sich diese beiden Extremgruppen hingegen bei der Belästigung durch Straßenlärm, Nachbarschaftslärm, Lärm insgesamt und bei der Belästigung durch Erschütterungen:

**Abbildung 92: Lebensqualität und Lärmbelästigung nach Quelle (gruppiert) im Mittelwertvergleich (aufsteigend sortiert nach Extremwertdifferenz)**

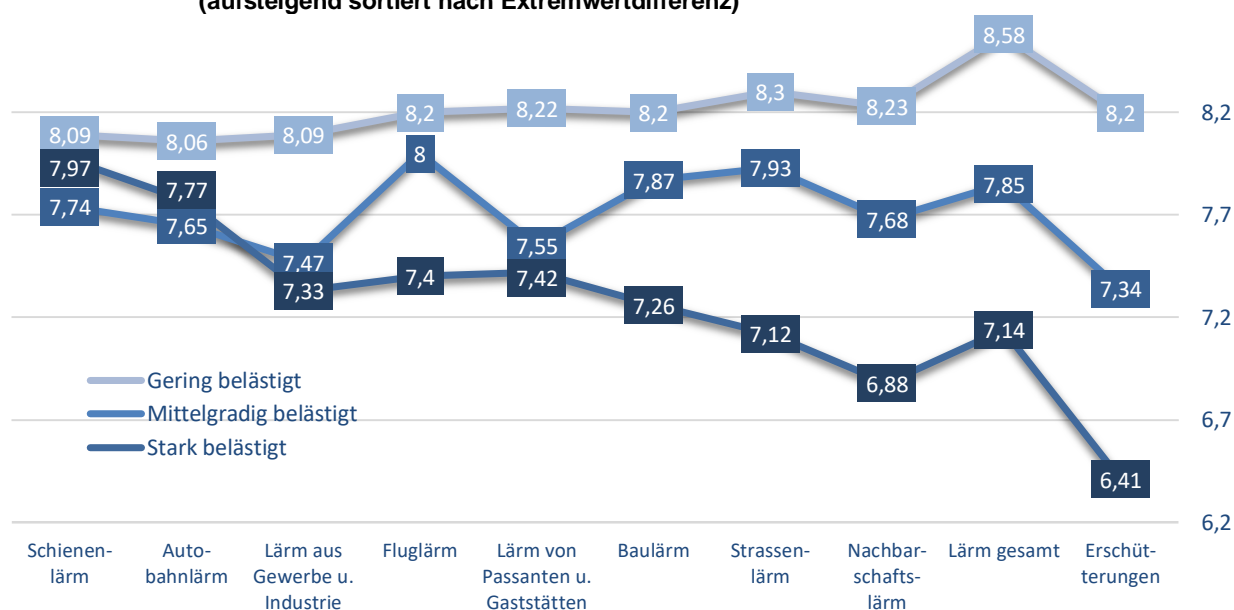

## 6. Lebensqualität und Belästigung durch Lärm im Schlaf

Die Anzahl an Personen, welche sich im Schlaf durch Lärm stärker gestört fühlen ist begrenzt. Die Belästigungen durch Schienenverkehrs-, Baustellen-, und Autobahnlärm in der Nacht zeigen kaum relevante Bezüge zur Einschätzung der eigenen Lebensqualität. Sehr deutlich treten Beziehungen hingegen bei Störungen durch den Lärm insgesamt, durch Nachbarschaftslärm, Lärm von Gewerbe und Industrie und die Störung durch Erschütterungen zutage. Vor allem bei den drei Letztgenannten wirkt sich das Belästigungsmaß deutlich auf die Einschätzung der eigenen Lebensqualität aus:

**Abbildung 93: Lebensqualität und Lärmbelästigung im Schlaf nach Quelle (gruppiert) im Mittelwertvergleich (aufsteigend sortiert nach Extremwertdifferenz)**

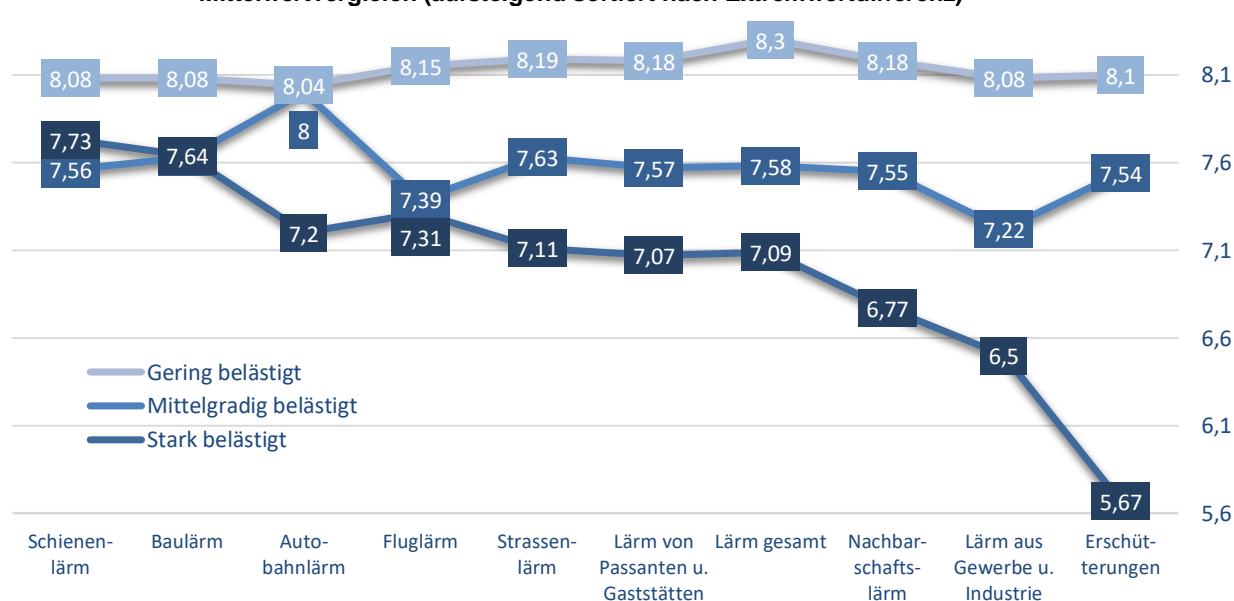

# Lärmempfindlichkeit

## 1. Lärmempfindlichkeit im Überblick

Etwas mehr als ein Viertel aller Befragten schätzt sich selbst als überhaupt nicht bis kaum lärmempfindlich ein (unterste 3 Antwortkategorien), knapp 17% hingegen als stark bis außerordentlich lärmempfindlich (oberste 3 Antwortkategorien). Die Mehrheit der Befragten siedelt das Ausmaß der eigenen Lärmempfindlichkeit in den mittleren 5 Antwortkategorien an. Alle befragten Innsbruckerinnen und Innsbrucker und Innsbrucker machen Angaben zu dieser Frage:

**Abbildung 94: Einschätzung der eigenen Lärmempfindlichkeit in Prozent**

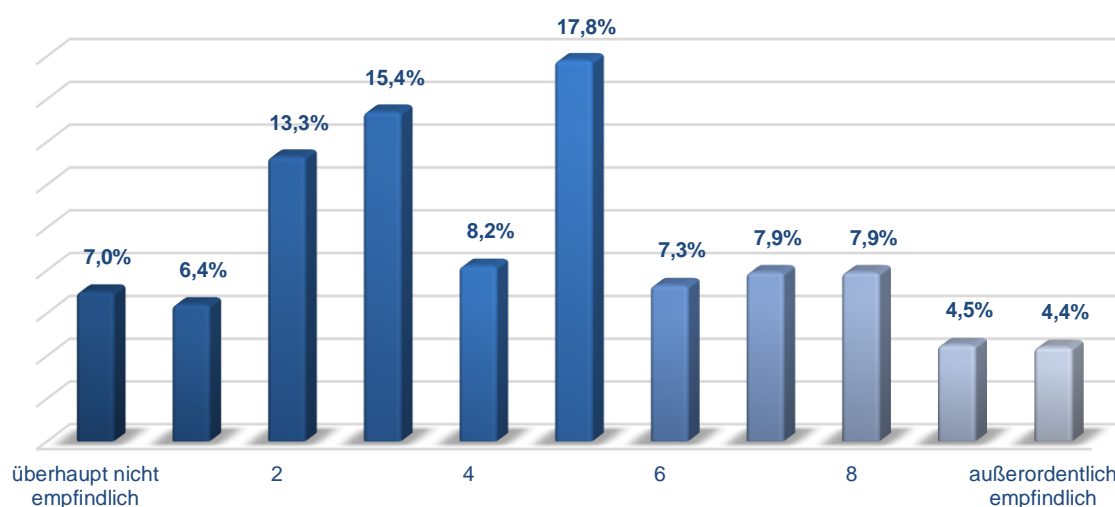

Der Mittelwert der Antworten liegt auf der 11-er Skala von *überhaupt nicht empfindlich* bis *außerordentlich empfindlich* bei 4,47 (Standardfehler 0,084), das entspricht einem durchschnittlichen Ausmaß der Einschätzung der eigenen Lärmempfindlichkeit der befragten Innsbruckerinnen und Innsbrucker von 49,17% vom Maximalwert.

**Tabelle 82: Einschätzung der eigenen Lärmempfindlichkeit gruppiert**

|                       | Häufigkeit | Gültige Prozente | Kumulierte Prozente |
|-----------------------|------------|------------------|---------------------|
| Nicht lärmempfindlich | 275        | 26,7             | 26,7                |
| Durchschnittlich      | 584        | 56,6             | 83,3                |
| Sehr lärmempfindlich  | 172        | 16,7             | 100,0               |
| Gesamt                | 1031       | 100,0            |                     |

## 2. Lärmempfindlichkeit und ausgewählte Parameter

Frauen schätzen sich selbst häufiger und auch im Ausmaß stärker als lärmempfindlich ein als Männer.

Die Altersgruppe über 60 Jahren hat den größten Anteil an nicht bis kaum lärmempfindlichen Befragten. Insgesamt empfinden sich jedoch die Befragten der Altersgruppe der 18 bis 40-Jährigen am wenigsten lärmempfindlich, während in der Gruppe der 40 bis 60-Jährigen die meisten und am stärksten

Lärmempfindlichen enthalten sind. Insgesamt ist eine Zunahme der Häufigkeit und des Ausmaßes der Lärmempfindlichkeit mit steigendem Alter bis zur Schwelle des 65. bis 70. Lebensjahres festzustellen.

Sehr deutlich unterscheiden sich (auch altersbereinigt) erneut die Bildungsschichten: Akademikerinnen und Akademiker stufen sich im Vergleich mit Pflichtschulabgängerinnen und –Abgängern sowohl im Ausmaß als auch in der Häufigkeit in etwa doppelt so stark und häufig als sehr lärmempfindlich ein und umgekehrt.

Lärmempfindlichere Befragte schätzen die negativen Auswirkungen von Lärm auf die Gesundheit deutlich stärker ein als weniger Lärmempfindliche.

Probandinnen und Probanden mit selbstreferenziertem schlechteren Gesundheitszustand sind häufiger sehr lärmempfindlich als Befragte mit gutem Gesundheitszustand:

**Tabelle 83: Einschätzung der eigenen Lärmempfindlichkeit (gruppiert) und ausgewählte Variablen**

|                                                                                     |                           | Ausmaß eigene Lärmempfindlichkeit gruppiert |            |                                     |            |                         |            |
|-------------------------------------------------------------------------------------|---------------------------|---------------------------------------------|------------|-------------------------------------|------------|-------------------------|------------|
|                                                                                     |                           | Kaum<br>lärmempfindlich                     |            | Durchschnittlich<br>lärmempfindlich |            | Sehr<br>lärmempfindlich |            |
|                                                                                     |                           | Anzahl                                      | Zeilen (%) | Anzahl                              | Zeilen (%) | Anzahl                  | Zeilen (%) |
| <b>Geschlecht</b>                                                                   | weiblich                  | 134                                         | 24,8%      | 306                                 | 56,6%      | 101                     | 18,7%      |
|                                                                                     | männlich                  | 141                                         | 28,8%      | 278                                 | 56,7%      | 71                      | 14,5%      |
| <b>Altersgruppen</b>                                                                | 18 bis 40 Jahre           | 120                                         | 27,3%      | 266                                 | 60,5%      | 54                      | 12,3%      |
|                                                                                     | 41 bis 60 Jahre           | 77                                          | 24,4%      | 175                                 | 55,4%      | 64                      | 20,3%      |
|                                                                                     | über 60 Jahre             | 78                                          | 28,4%      | 143                                 | 52,0%      | 54                      | 19,6%      |
| <b>Bildungsschicht</b>                                                              | Primärer Schulabschluss   | 42                                          | 42,9%      | 47                                  | 48,0%      | 9                       | 9,2%       |
|                                                                                     | Sekundärer Schulabschluss | 149                                         | 27,5%      | 313                                 | 57,7%      | 80                      | 14,8%      |
|                                                                                     | Tertiärer Schulabschluss  | 82                                          | 21,1%      | 223                                 | 57,5%      | 83                      | 21,4%      |
| <b>Einschätzung des Ausmaßes negativer Auswirkungen von Lärm auf die Gesundheit</b> | Wenig                     | 73                                          | 33,6%      | 123                                 | 56,7%      | 21                      | 9,7%       |
|                                                                                     | Stark                     | 188                                         | 24,1%      | 447                                 | 57,2%      | 146                     | 18,7%      |
| <b>Gesundheitszustand</b>                                                           | Gut                       | 206                                         | 27,3%      | 426                                 | 56,5%      | 122                     | 16,2%      |
|                                                                                     | Zufriedenstellend         | 46                                          | 24,7%      | 112                                 | 60,2%      | 28                      | 15,1%      |
|                                                                                     | Nicht gut                 | 23                                          | 25,8%      | 44                                  | 49,4%      | 22                      | 24,7%      |
| <b>Lebensqualität</b>                                                               | Nicht gut (*)             | 1                                           | 10,0%      | 6                                   | 60,0%      | 3                       | 30,0%      |
|                                                                                     | Durchschnittlich          | 67                                          | 23,1%      | 174                                 | 60,0%      | 49                      | 16,9%      |
|                                                                                     | Sehr gut                  | 206                                         | 28,4%      | 400                                 | 55,2%      | 119                     | 16,4%      |
| <b>Lautheit Innsbruck im Vergleich zu anderen Städten Österreichs</b>               | Ruhiger                   | 100                                         | 34,2%      | 157                                 | 53,8%      | 35                      | 12,0%      |
|                                                                                     | Gleich                    | 135                                         | 24,5%      | 315                                 | 57,2%      | 101                     | 18,3%      |
|                                                                                     | Lauter                    | 38                                          | 21,8%      | 102                                 | 58,6%      | 34                      | 19,5%      |

\* zu kleine Fallzahlen für solide Auswertungen

Befragte Innsbruckerinnen und Innsbrucker mit hoher Lebensqualität sehen sich weniger häufig und in geringerem Ausmaß als lärmempfindlich an als Personen mit geringerer Lebensqualität.

Diejenigen Befragten, die davon ausgehen, dass es in Innsbruck im Vergleich zu anderen Städten Österreichs ruhiger ist, sind deutlich weniger häufig und weniger stark lärmempfindlich als Befragte, welche glauben, dass Innsbruck gleich laut oder lauter als andere vergleichbare Städte ist.

### 3. Lärmempfindlichkeit und Lärmbelastung

Das Ausmaß der Lärmempfindlichkeit der Befragten zeigt keine deutliche Beziehung zur tatsächlich vorhandenen Verkehrslärmbelastung im Wohnumfeld der Befragten:

**Tabelle 84: Bivariate Korrelation zu Lärmempfindlichkeit und 24h-Lärmbelastung  $L_{den}$  nach Quelle**

|                                   |                          | Straßenlärm 24h | Schienenlärm 24h | Fluglärm 24h |
|-----------------------------------|--------------------------|-----------------|------------------|--------------|
| Ausmaß eigene Lärmempfindlichkeit | Korrelation nach Pearson | -,053           | -,028            | -,002        |
|                                   | Signifikanz (2-seitig)   | ,090            | ,370             | ,959         |
|                                   | N                        | 1031            | 1031             | 1031         |

Ebenso wenig im Mittelwertvergleich zum Straßenverkehrslärm:

**Tabelle 85: Lärmempfindlichkeit und 24h-Straßenlärm  $L_{den}$  in 10-dB Schritten im Mittelwertvergleich**

| Straßenlärm 24h | Mittelwert | N    | Standardabweichung |
|-----------------|------------|------|--------------------|
| unter 30dB (*)  | 1,5000     | 2    | ,70711             |
| 30 bis 40dB     | 2,0769     | 26   | ,56022             |
| 40 bis 50dB     | 2,0205     | 195  | ,65770             |
| 50 bis 60dB     | 1,8343     | 531  | ,65216             |
| über 60dB       | 1,9278     | 277  | ,63860             |
| Insgesamt       | 1,9001     | 1031 | ,65115             |

\* zu kleine Fallzahlen für solide Auswertungen

Auch für den Flugverkehrslärm sind keine eindeutigen statistischen Korrelationen nachweisbar:

**Tabelle 86: Lärmempfindlichkeit und 24h-Fluglärm  $L_{den}$  in 10-dB Schritten im Mittelwertvergleich**

| Fluglärm 24h | Mittelwert | N    | Standardabweichung |
|--------------|------------|------|--------------------|
| 30 bis 40dB  | 1,9424     | 243  | ,63374             |
| 40 bis 50dB  | 1,8760     | 621  | ,66654             |
| 50 bis 60dB  | 1,9111     | 135  | ,61652             |
| über 60dB    | 2,0000     | 32   | ,62217             |
| Insgesamt    | 1,9001     | 1031 | ,65115             |

Dasselbe gilt für den Schienenverkehrslärm:



**Tabelle 87: Lärmempfindlichkeit und 24h-Schienenlärm  $L_{den}$  in 10-dB Schritten im Mittelwertvergleich**

| Schienenlärm 24h | Mittelwert | N    | Standardabweichung |
|------------------|------------|------|--------------------|
| unter 30dB       | 2,0000     | 15   | ,53452             |
| 30 bis 40dB      | 1,9120     | 284  | ,65873             |
| 40 bis 50dB      | 1,9072     | 485  | ,64415             |
| 50 bis 60dB      | 1,8565     | 209  | ,65667             |
| über 60dB        | 1,9211     | 38   | ,71212             |
| Insgesamt        | 1,9001     | 1031 | ,65115             |

Für die Zusammenschau der persönlichen Lärmempfindlichkeit mit den tatsächlich gegebenen Verkehrslärmpegeln in der Nacht lassen sich ebenso wie für den 24h-Zeitraum keine eindeutigen statistischen Beziehungen herstellen.

#### 4. Lärmempfindlichkeit und Lärmexpositionsempfinden

Befragte, welche sich stärker lärmexponiert fühlen, schätzen sich auch häufiger als lärmempfindlicher ein und umgekehrt. Die Zusammenhänge sind jedoch weniger ausgeprägt als etwa bei den Beziehungen zur Lebensqualität:

**Tabelle 88: Lärmempfindlichkeit und Lärmexpositionsempfinden nach Quelle (gruppiert)**

|                                              |                        | Ausmaß eigene Lärmempfindlichkeit gruppiert |            |                  |            |                      |            |
|----------------------------------------------|------------------------|---------------------------------------------|------------|------------------|------------|----------------------|------------|
|                                              |                        | Nicht lärmempfindlich                       |            | Durchschnittlich |            | Sehr lärmempfindlich |            |
|                                              |                        | Anzahl                                      | Zeilen (%) | Anzahl           | Zeilen (%) | Anzahl               | Zeilen (%) |
| <b>Ausgesetztheit<br/>Lärm gesamt</b>        | Gering exponiert       | 100                                         | 38,3%      | 115              | 44,1%      | 46                   | 17,6%      |
|                                              | Mittelgradig exponiert | 150                                         | 23,8%      | 385              | 61,1%      | 95                   | 15,1%      |
|                                              | Stark exponiert        | 25                                          | 17,9%      | 84               | 60,0%      | 31                   | 22,1%      |
| <b>Ausgesetztheit<br/>Fluglärm</b>           | Gering exponiert       | 134                                         | 33,6%      | 217              | 54,4%      | 48                   | 12,0%      |
|                                              | Mittelgradig exponiert | 105                                         | 22,5%      | 278              | 59,5%      | 84                   | 18,0%      |
|                                              | Stark exponiert        | 36                                          | 21,8%      | 89               | 53,9%      | 40                   | 24,2%      |
| <b>Ausgesetztheit<br/>Strassenlärm</b>       | Gering exponiert       | 142                                         | 33,0%      | 216              | 50,2%      | 72                   | 16,7%      |
|                                              | Mittelgradig exponiert | 111                                         | 23,9%      | 277              | 59,7%      | 76                   | 16,4%      |
|                                              | Stark exponiert        | 22                                          | 16,1%      | 91               | 66,4%      | 24                   | 17,5%      |
| <b>Ausgesetztheit<br/>Baulärm</b>            | Gering exponiert       | 191                                         | 28,4%      | 383              | 56,9%      | 99                   | 14,7%      |
|                                              | Mittelgradig exponiert | 61                                          | 24,3%      | 138              | 55,0%      | 52                   | 20,7%      |
|                                              | Stark exponiert        | 23                                          | 21,5%      | 63               | 58,9%      | 21                   | 19,6%      |
| <b>Ausgesetztheit<br/>Nachbarschaftslärm</b> | Gering exponiert       | 204                                         | 28,7%      | 403              | 56,7%      | 104                  | 14,6%      |
|                                              | Mittelgradig exponiert | 53                                          | 20,6%      | 150              | 58,4%      | 54                   | 21,0%      |
|                                              | Stark exponiert        | 18                                          | 28,6%      | 31               | 49,2%      | 14                   | 22,2%      |
| <b>Ausgesetztheit<br/>Lärm von Passanten</b> | Gering exponiert       | 194                                         | 27,2%      | 401              | 56,2%      | 118                  | 16,5%      |
|                                              | Mittelgradig exponiert | 65                                          | 25,3%      | 148              | 57,6%      | 44                   | 17,1%      |

|                                       |                        |       |       |     |       |       |       |
|---------------------------------------|------------------------|-------|-------|-----|-------|-------|-------|
| <b>u. Gaststätten</b>                 | Stark exponiert        | 16    | 26,2% | 35  | 57,4% | 10    | 16,4% |
| <b>Ausgesetztheit</b>                 | Gering exponiert       | 233   | 28,9% | 446 | 55,3% | 127   | 15,8% |
| <b>Erschütterungen</b>                | Mittelgradig exponiert | 32    | 17,5% | 114 | 62,3% | 37    | 20,2% |
|                                       | Stark exponiert        | 10    | 23,8% | 24  | 57,1% | 8     | 19,0% |
| <b>Ausgesetztheit</b>                 | Gering exponiert       | 234   | 27,7% | 475 | 56,2% | 136   | 16,1% |
| <b>Schienenlärm</b>                   | Mittelgradig exponiert | 32    | 20,4% | 93  | 59,2% | 32    | 20,4% |
|                                       | Stark exponiert        | 9     | 31,0% | 16  | 55,2% | 4 (*) | 13,8% |
| <b>Ausgesetztheit</b>                 | Gering exponiert       | 259   | 27,8% | 524 | 56,3% | 148   | 15,9% |
| <b>Autobahnlärm</b>                   | Mittelgradig exponiert | 12    | 14,8% | 48  | 59,3% | 21    | 25,9% |
|                                       | Stark exponiert        | 4 (*) | 21,1% | 12  | 63,2% | 3 (*) | 15,8% |
| <b>Ausgesetztheit</b>                 | Gering exponiert       | 256   | 27,5% | 523 | 56,1% | 153   | 16,4% |
| <b>Lärm von Gewerbe und Industrie</b> | Mittelgradig exponiert | 17    | 21,5% | 46  | 58,2% | 16    | 20,3% |
|                                       | Stark exponiert        | 2 (*) | 10,0% | 15  | 75,0% | 3 (*) | 15,0% |

\* zu kleine Fallzahlen für solide Auswertungen

## 5. Lärmempfindlichkeit und Lärmbelästigung

Die Selbsteinschätzung der eigenen Lärmempfindlichkeit zeigt eine deutliche wechselseitige Beziehung zur empfundenen Lärmbelästigung:

**Abbildung 95: Lärmempfindlichkeit und Belästigung durch Lärm insgesamt im Mittelwertvergleich**

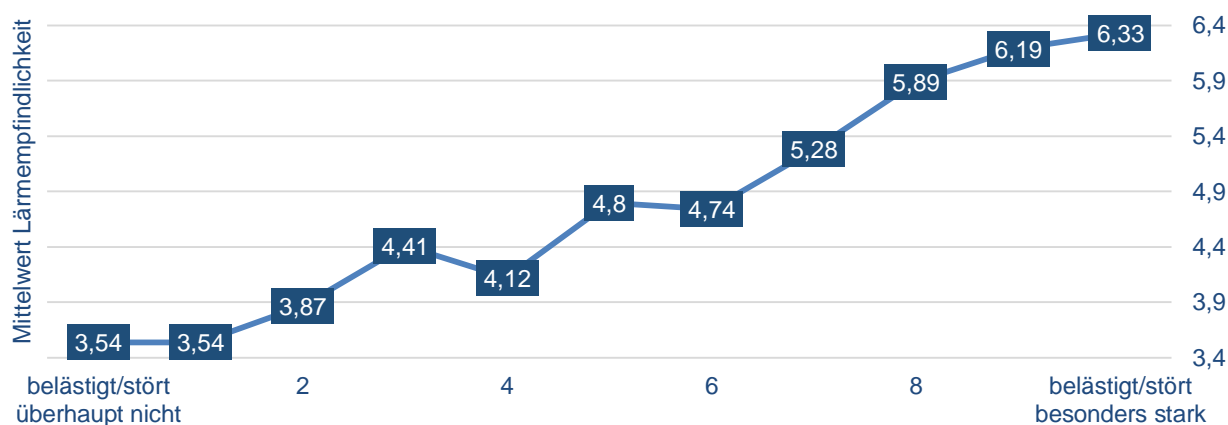

Stark lärmempfindliche Befragte fühlen sich häufiger und stärker vom Lärm belästigt und sich stark vom Lärm gestört empfindende Befragte schätzen sich selbst als lärmempfindlicher ein.

Die Unterschiede im Antwortverhalten sind besonders im Vergleich der Extremgruppen beim Straßenverkehrs- und Fluglärm, sowie dem Lärm insgesamt sehr stark ausgeprägt, während beim nichtverkehrsverursachten Lärm, sowie dem Schienenverkehrslärm die Extremgruppen geringer voneinander abweichen:

**Abbildung 96: Lärmempfindlichkeit und Belästigung durch Lärm nach Quelle (gruppiert) im Mittelwertvergleich (aufsteigend sortiert nach Extremwertdifferenz)**

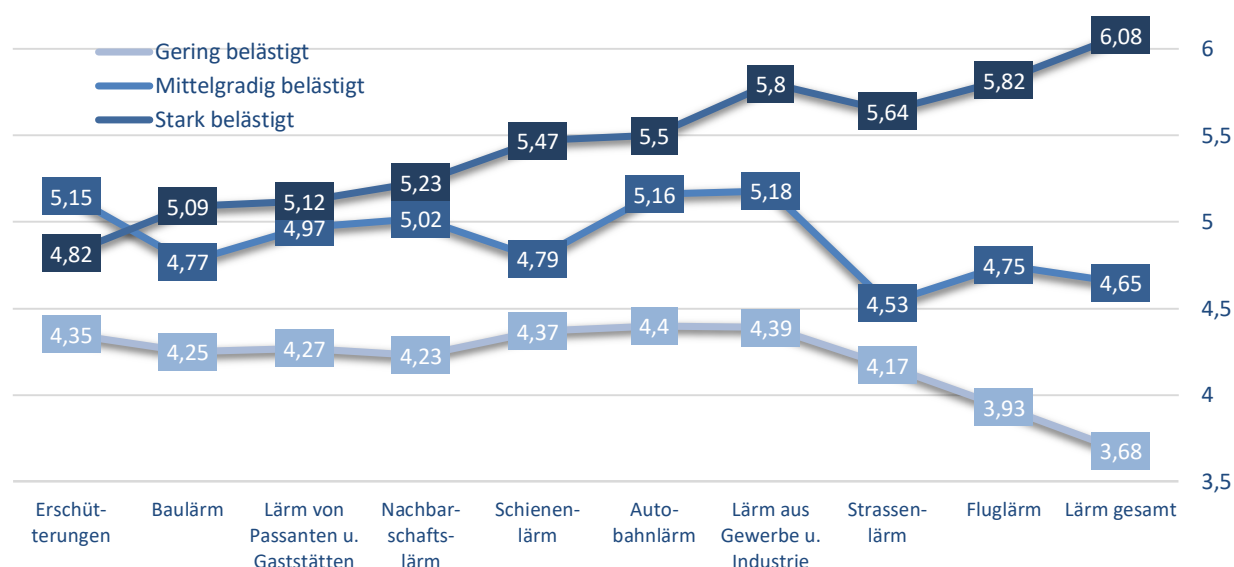

Aus den Auswertungen geht hervor, dass die Einschätzung der Lärmempfindlichkeit insgesamt stark auf den Verkehrslärm referenziert.

**Tabelle 89: Lärmempfindlichkeit und Belästigung durch Verkehrslärm nach Quelle gruppiert**

|                                 |                        | Ausmaß eigene Lärmempfindlichkeit gruppiert |            |                  |            |                      |            |
|---------------------------------|------------------------|---------------------------------------------|------------|------------------|------------|----------------------|------------|
|                                 |                        | Nicht lärmempfindlich                       |            | Durchschnittlich |            | Sehr lärmempfindlich |            |
|                                 |                        | Anzahl                                      | Zeilen (%) | Anzahl           | Zeilen (%) | Anzahl               | Zeilen (%) |
| <b>Belästigung Lärm gesamt</b>  | Gering belästigt       | 159                                         | 42,1%      | 168              | 44,4%      | 51                   | 13,5%      |
|                                 | Mittelgradig belästigt | 103                                         | 19,5%      | 346              | 65,5%      | 79                   | 15,0%      |
|                                 | Stark belästigt        | 13                                          | 10,4%      | 70               | 56,0%      | 42                   | 33,6%      |
| <b>Belästigung Fluglärm</b>     | Gering belästigt       | 179                                         | 35,1%      | 267              | 52,4%      | 64                   | 12,5%      |
|                                 | Mittelgradig belästigt | 82                                          | 20,5%      | 245              | 61,3%      | 73                   | 18,3%      |
|                                 | Stark belästigt        | 14                                          | 11,6%      | 72               | 59,5%      | 35                   | 28,9%      |
| <b>Belästigung Straßenlärm</b>  | Gering belästigt       | 177                                         | 32,8%      | 274              | 50,8%      | 88                   | 16,3%      |
|                                 | Mittelgradig belästigt | 85                                          | 22,7%      | 234              | 62,4%      | 56                   | 14,9%      |
|                                 | Stark belästigt        | 13                                          | 11,1%      | 76               | 65,0%      | 28                   | 23,9%      |
| <b>Belästigung Schienenlärm</b> | Gering belästigt       | 237                                         | 28,2%      | 468              | 55,7%      | 135                  | 16,1%      |
|                                 | Mittelgradig belästigt | 35                                          | 21,7%      | 96               | 59,6%      | 30                   | 18,6%      |
|                                 | Stark belästigt        | 3                                           | 10,0%      | 20               | 66,7%      | 7                    | 23,3%      |

**Abbildung 97: Lärmempfindlichkeit und Belästigung durch Verkehrslärm nach Quelle (gruppiert) im Mittelwertvergleich**

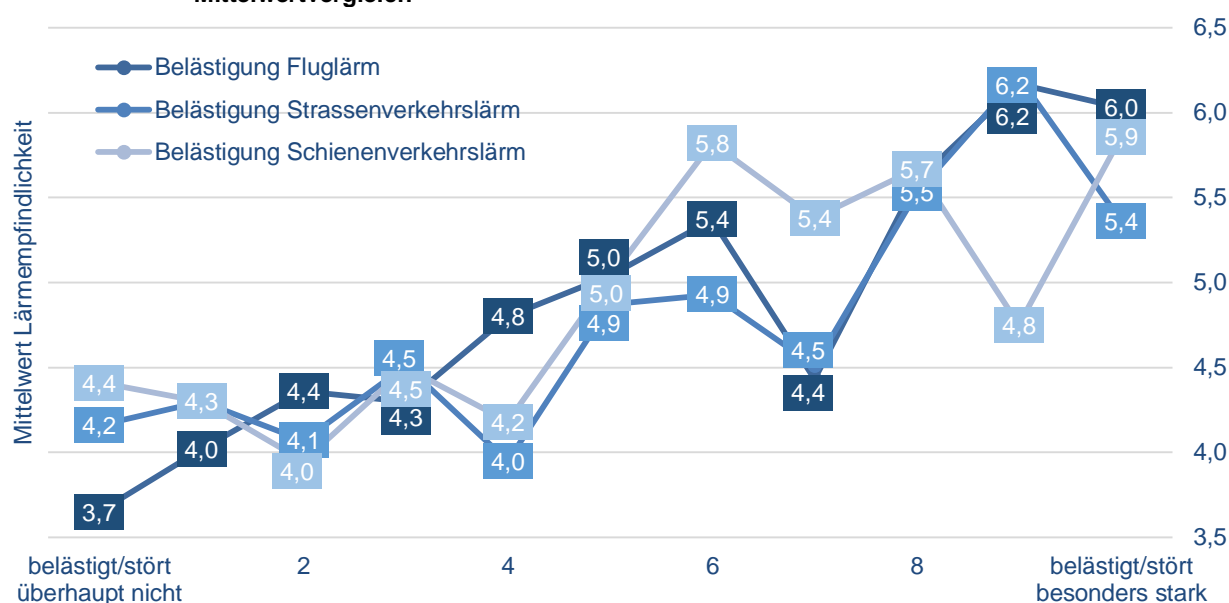

## 6. Lärmempfindlichkeit und Belästigung durch Lärm im Schlaf

Auch in Beziehung der Einschätzung der eigenen Lärmempfindlichkeit zur empfundenen Lärmbelästigung im Schlaf nach Quelle zeigt sich die Orientierung der Lärmempfindlichkeit am Verkehrslärm. Die Unterschiede zwischen den Extremgruppen fallen sehr deutlich aus. Eine Auffälligkeit tritt in der Zusammenschau der Lärmempfindlichkeit mit der Belästigung durch Lärm aus Gewerbe und Industrie zutage. Die 10 befragten Innsbruckerinnen und Innsbrucker, welche sich stark vom Lärm aus Gewerbe und Industrie im Schlaf gestört fühlen, schätzen sich selbst als sehr lärmempfindlich ein und sorgen für einen außertourlichen Spitzenwert in der Kombination dieser beiden Variablen:

**Abbildung 98: Lärmempfindlichkeit und Belästigung durch Lärm im Schlaf nach Quelle (gruppiert) im Mittelwertvergleich (aufsteigend sortiert nach Extremwertdifferenz)**

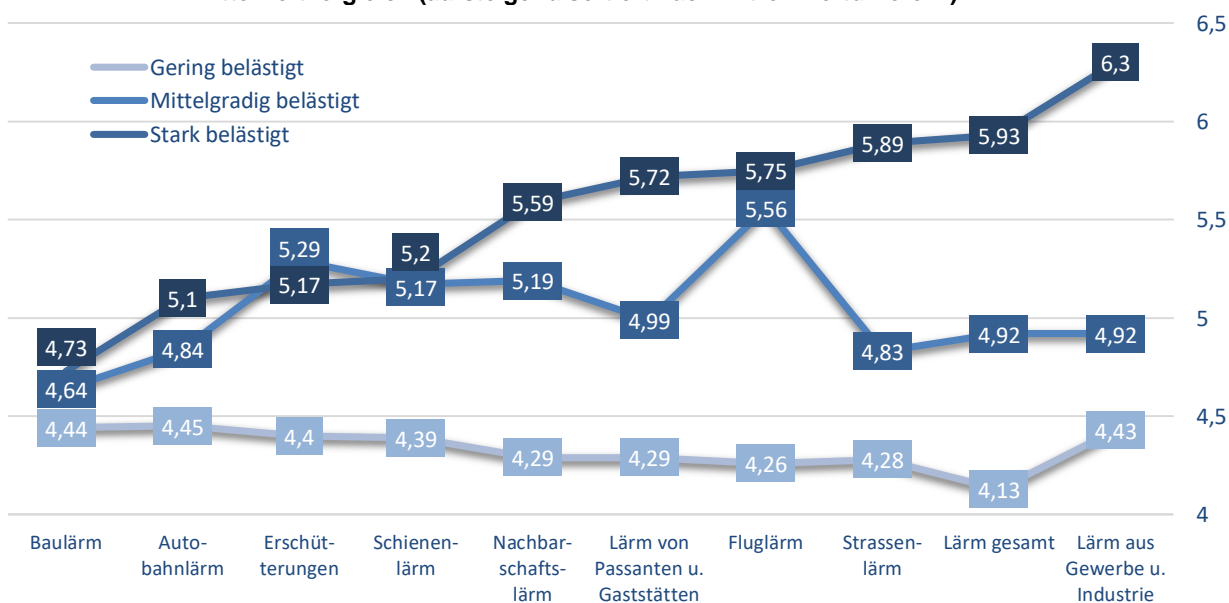

## Wind- und Wettereinflüsse auf die Lärmbelastung

### 1. Wind- und Wettereinflüsse auf den Lärm im Überblick

Zwei Drittel aller befragten Innsbruckerinnen und Innsbrucker glauben, dass die Wind- und Wetterverhältnisse sich *gar nicht* oder *eher wenig* auf die Lärmbelastung auswirken. 38 Befragte geben an, dass sie diese Frage nicht beurteilen können und 30% der Probandinnen und Probanden sind der Meinung, dass sich die Wind- und Wetterverhältnisse *eher stark* bis *sehr stark* auf die Lärmbelastung insgesamt auswirken:

**Abbildung 99: Ausmaß des Einflusses von Wind- und Wetterverhältnissen auf die Lärmbelastung**

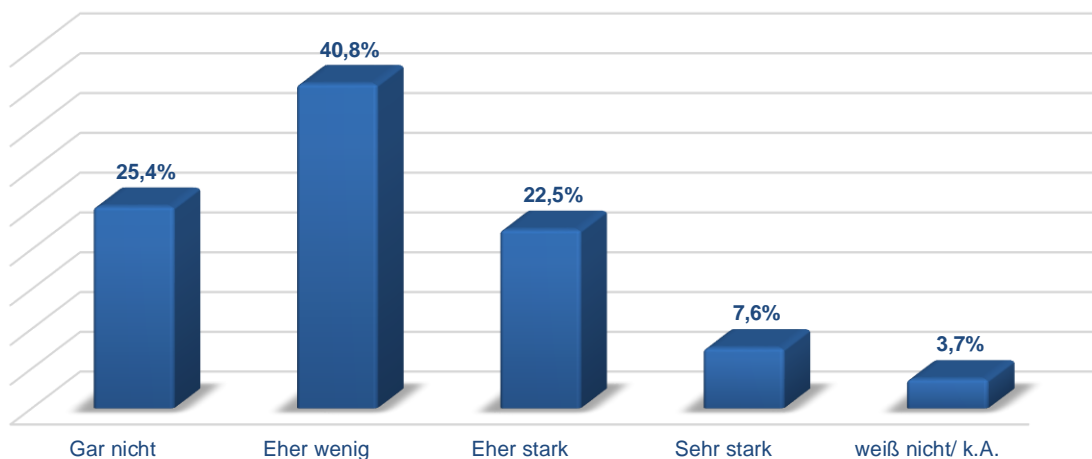

**Tabelle 90: Einfluss von Wind- und Wetterverhältnissen auf die Lärmbelastung gruppiert**

|             | Häufigkeit | Gültige Prozente | Kumulierte Prozente |
|-------------|------------|------------------|---------------------|
| Gering      | 683        | 66,2             | 66,2                |
| Stark       | 310        | 30,1             | 96,3                |
| k.A. / w.n. | 38         | 3,7              | 100,0               |
| Gesamt      | 1031       | 100,0            |                     |

### 2. Wind- und Wettereinflüsse und ausgewählte Parameter

Frauen gehen von einem geringfügig stärkeren Einfluss der Wind- und Wetterverhältnissen auf die Lärmbelastung aus als Männer. Ebenso die 40- bis 60-Jährigen im Vergleich zu den beiden anderen Altersgruppen.

Eine deutliche Funktion zeigt sich in Abhängigkeit von der Bildungsschicht: Je höher der bisher erreichte höchste Bildungsabschluss, desto eher (auch altersbereinigt) gehen Befragte von einem stärkeren Einfluss der Wind- und Wetterverhältnissen auf die Lärmbelastung aus und umgekehrt:

**Tabelle 91: Einfluss von Wind- und Wetterverhältnissen auf die Lärmbelastung und ausgewählte Parameter (gruppiert, ohne Antwortkategorie k.A./w.n.)**

|                                                             |                                              | Ausmaß Windeinfluss auf Lärm (gruppiert) |            |        |            |
|-------------------------------------------------------------|----------------------------------------------|------------------------------------------|------------|--------|------------|
|                                                             |                                              | Gering                                   |            | Stark  |            |
|                                                             |                                              | Anzahl                                   | Zeilen (%) | Anzahl | Zeilen (%) |
| <b>Geschlecht</b>                                           | weiblich                                     | 347                                      | 66,9%      | 172    | 33,1%      |
|                                                             | männlich                                     | 336                                      | 70,9%      | 138    | 29,1%      |
| <b>Altersgruppen</b>                                        | 18 bis 40 Jahre                              | 289                                      | 69,6%      | 126    | 30,4%      |
|                                                             | 41 bis 60 Jahre                              | 197                                      | 63,5%      | 113    | 36,5%      |
|                                                             | über 60 Jahre                                | 197                                      | 73,5%      | 71     | 26,5%      |
| <b>Bildungsschicht</b>                                      | Primärer Schulabschluss                      | 73                                       | 78,5%      | 20     | 21,5%      |
|                                                             | Sekundärer Schulabschluss                    | 372                                      | 71,4%      | 149    | 28,6%      |
|                                                             | Tertiärer Schulabschluss                     | 236                                      | 62,8%      | 140    | 37,2%      |
| <b>Baulicher Schutz vor Verkehrslärm</b>                    | Keine bis geringfügige Abschirmung vorhanden | 493                                      | 67,0%      | 243    | 33,0%      |
|                                                             | Gute bis komplette Abschirmung vorhanden     | 169                                      | 73,8%      | 60     | 26,2%      |
| <b>Schutz vor Verkehrslärm durch Innenhof etc.</b>          | Ja                                           | 490                                      | 72,7%      | 184    | 27,3%      |
|                                                             | Nein                                         | 180                                      | 60,6%      | 117    | 39,4%      |
|                                                             | weiß nicht/ k.A.                             | 13                                       | 59,1%      | 9      | 40,9%      |
| <b>Nachtschlaf</b>                                          | Fenster nachts geöffnet/gekippt              | 543                                      | 68,6%      | 248    | 31,4%      |
|                                                             | Fenster nachts geschlossen                   | 134                                      | 69,1%      | 60     | 30,9%      |
| <b>Lärmschutzfenster in den letzten 10 Jahren eingebaut</b> | Ja                                           | 120                                      | 65,2%      | 64     | 34,8%      |
|                                                             | Nein                                         | 437                                      | 67,1%      | 214    | 32,9%      |
|                                                             | weiß nicht/ k.A.                             | 126                                      | 79,7%      | 32     | 20,3%      |
| <b>Lautheit Innsbruck im Vergleich zu anderen Städten</b>   | Ruhiger                                      | 198                                      | 70,5%      | 83     | 29,5%      |
|                                                             | Gleich                                       | 369                                      | 69,9%      | 159    | 30,1%      |
|                                                             | Lauter                                       | 105                                      | 61,4%      | 66     | 38,6%      |
| <b>Straßenlärm 24h</b>                                      | Stark belastet >55dB                         | 334                                      | 67,7%      | 159    | 32,3%      |
|                                                             | Mittelgradig belastet 45-55dB                | 272                                      | 69,4%      | 120    | 30,6%      |
|                                                             | Gering belastet <45dB                        | 77                                       | 71,3%      | 31     | 28,7%      |
| <b>Ausgesetztheit Lärm gesamt</b>                           | Gering exponiert                             | 199                                      | 78,3%      | 55     | 21,7%      |
|                                                             | Mittelgradig exponiert                       | 408                                      | 67,3%      | 198    | 32,7%      |
|                                                             | Stark exponiert                              | 76                                       | 57,1%      | 57     | 42,9%      |
| <b>Belästigung Lärm gesamt</b>                              | Gering belästigt                             | 279                                      | 76,4%      | 86     | 23,6%      |
|                                                             | Mittelgradig belästigt                       | 341                                      | 67,3%      | 166    | 32,7%      |
|                                                             | Stark belästigt                              | 63                                       | 52,1%      | 58     | 47,9%      |

Befragte in Wohnungen mit keinen bis nur geringfügigen baulichen Abschirmungen gegen den Verkehrslärm gehen von stärkeren Wettereinflüssen auf die Lärmbelastung aus, als gut bis komplett abgeschirmt wohnende Probandinnen und Probanden. Dasselbe gilt für Befragte, die in ihrem Wohnumfeld über eine lärmabgewandte Seite oder einen lärmgeschützten Innenhof verfügen.

Ob die Befragten nachts bei offenem / gekipptem oder geschlossenem Fenster schlafen bzw. ob in den letzten 10 Jahren Lärmschutzfenster verbaut wurden, zeigt keine Zusammenhänge zur Einschätzung des Einflusses von Wind- und Wetterverhältnissen auf die Lärmbelastung.

Auch das Ausmaß des vorhandenen Straßenlärms zeigt keine großen Unterschiede zwischen den einzelnen Belastungsgruppen und deren Einschätzung des Einflusses von Wind- und Wetterverhältnissen auf die Lärmbelastung. In Beziehung zum Ausmaß des vorhandenen Fluglärms sind ebenfalls nur geringe Unterschiede zwischen den Extremgruppen feststellbar.

Deutlich hingegen wirken die Lärmwahrnehmung und die psychologische Disposition: Sich stark dem Lärm ausgesetzt oder von diesem belästigt empfindende Befragte gehen von einem stärkeren Einfluss der Wind- und Wetterverhältnissen auf die Lärmbelastung aus, als sich weniger stark exponiert oder belästigt empfindende Innsbruckerinnen und Innsbrucker. Etwas eingeschränkter gilt dasselbe auch für die Beziehungen zum Ausmaß der Einschätzung der eigenen Lärmempfindlichkeit.

# Nachtschlaf bei geöffnetem Fenster

## 1. Nachtschlaf bei geöffnetem Fenster im Überblick

Fast 50% aller befragten Innsbruckerinnen und Innsbrucker schlafen nachts *häufig bis immer* bei geöffnetem oder gekippten Fenster, weitere 30% tun dies zumindest *gelegentlich*. Nur 0,7% der Befragten verfügen über eine *Wohnraumlüftung*, 6,6% möchten nicht bei geöffnetem oder gekipptem Fenster schlafen und für 12,3% wäre dies *zu laut*. 8 Befragte machen keine Angaben:

**Abbildung 100: Nachtschlaf bei geöffnetem oder gekipptem Fenster in Prozent**

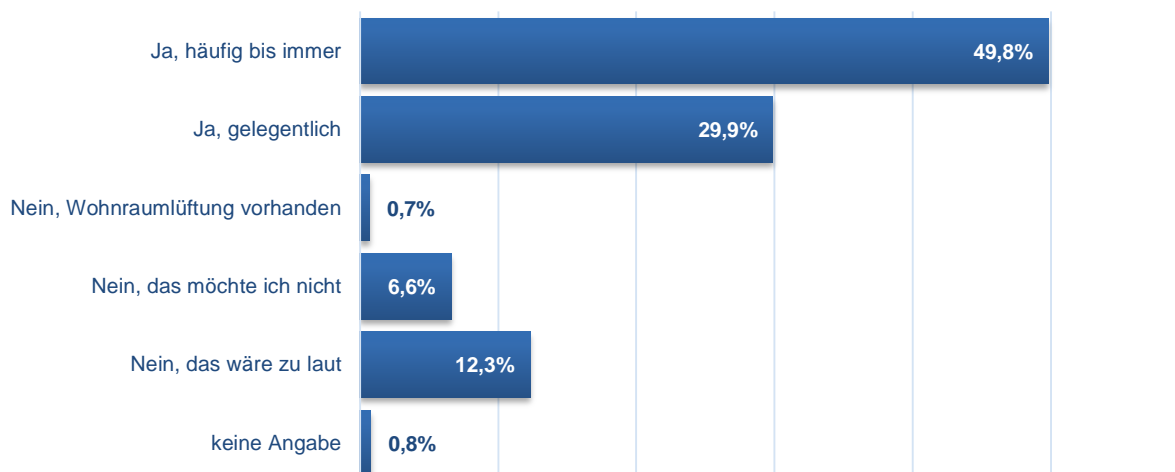

**Tabelle 92: Nachtschlaf bei geöffnetem oder gekipptem Fenster gruppiert**

|                                 | Häufigkeit | Gültige Prozente | Kumulierte Prozente |
|---------------------------------|------------|------------------|---------------------|
| Fenster nachts geöffnet/gekippt | 821        | 79,6             | 79,6                |
| Fenster nachts geschlossen      | 202        | 19,6             | 99,2                |
| Keine Angabe                    | 8          | ,8               | 100,0               |
| Gesamt                          | 1031       | 100,0            |                     |

## 2. Nachtschlaf und ausgewählte Parameter

Zwischen den Geschlechtern zeigen sich adjustiert nur geringe Unterschiede im Schlafverhalten. Auch die einzelnen Altersgruppen und die Bildungsschicht betreffend sind keine großen Unterschiede sichtbar.

Wie zu erwarten, schlafen Befragte, die über einen lärmgeschützten Innenhof, eine lärmabgewandte Seite oder gute bauliche Abschirmungen gegen den Verkehrslärm verfügen, häufiger bei geöffnetem oder gekipptem Fenster als Befragte, die über keinerlei oder wenig baulichen Lärmschutz verfügen. Die Unterschiede sind allerdings wohl kleiner als erwartet und der reine bauliche Lärmschutz an sich scheint nicht das ausschlaggebende Element für die Entscheidung der Befragten, ob sie bei geöffnetem oder geschlossenem Fenster schlafen, zu sein:



**Tabelle 93: Nachtschlaf bei geöffnetem oder gekipptem Fenster und ausgewählte Parameter (gruppiert, ohne Antwortkategorie k.A./w.n.)**

|                                                             |                                              | Nachtschlaf bei offenem oder gekippten Fenster gruppiert |            |                            |            |
|-------------------------------------------------------------|----------------------------------------------|----------------------------------------------------------|------------|----------------------------|------------|
|                                                             |                                              | Fenster nachts geöffnet/gekippt                          |            | Fenster nachts geschlossen |            |
|                                                             |                                              | Anzahl                                                   | Zeilen (%) | Anzahl                     | Zeilen (%) |
| <b>Geschlecht</b>                                           | weiblich                                     | 421                                                      | 78,3%      | 117                        | 21,7%      |
|                                                             | männlich                                     | 400                                                      | 82,5%      | 85                         | 17,5%      |
| <b>Altersgruppen</b>                                        | 18 bis 40 Jahre                              | 342                                                      | 78,3%      | 95                         | 21,7%      |
|                                                             | 41 bis 60 Jahre                              | 255                                                      | 81,2%      | 59                         | 18,8%      |
|                                                             | über 60 Jahre                                | 224                                                      | 82,4%      | 48                         | 17,6%      |
| <b>Bildungsschicht</b>                                      | Primärer Schulabschluss                      | 79                                                       | 80,6%      | 19                         | 19,4%      |
|                                                             | Sekundärer Schulabschluss                    | 435                                                      | 80,9%      | 103                        | 19,1%      |
|                                                             | Tertiärer Schulabschluss                     | 305                                                      | 79,4%      | 79                         | 20,6%      |
| <b>Baulicher Schutz vor Verkehrslärm</b>                    | Keine bis geringfügige Abschirmung vorhanden | 602                                                      | 79,2%      | 158                        | 20,8%      |
|                                                             | Gute bis komplette Abschirmung vorhanden     | 196                                                      | 83,4%      | 39                         | 16,6%      |
| <b>Schutz vor Verkehrslärm durch Innenhof etc.</b>          | Ja                                           | 552                                                      | 79,3%      | 144                        | 20,7%      |
|                                                             | Nein                                         | 250                                                      | 81,7%      | 56                         | 18,3%      |
|                                                             | weiß nicht/ k.A.                             | 19                                                       | 90,5%      | 2                          | 9,5%       |
| <b>Lärmschutzfenster in den letzten 10 Jahren eingebaut</b> | Ja                                           | 134                                                      | 72,4%      | 51                         | 27,6%      |
|                                                             | Nein                                         | 552                                                      | 82,6%      | 116                        | 17,4%      |
|                                                             | weiß nicht/ k.A.                             | 135                                                      | 79,4%      | 35                         | 20,6%      |
| <b>Lautheit Innsbruck im Vergleich zu anderen Städten</b>   | Ruhiger                                      | 234                                                      | 81,3%      | 54                         | 18,8%      |
|                                                             | Gleich                                       | 441                                                      | 80,5%      | 107                        | 19,5%      |
|                                                             | Lauter                                       | 133                                                      | 76,9%      | 40                         | 23,1%      |
| <b>Ausgesetztheit Lärm gesamt</b>                           | Gering exponiert                             | 226                                                      | 87,9%      | 31                         | 12,1%      |
|                                                             | Mittelgradig exponiert                       | 508                                                      | 81,0%      | 119                        | 19,0%      |
|                                                             | Stark exponiert                              | 87                                                       | 62,6%      | 52                         | 37,4%      |
| <b>Belästigung Lärm gesamt</b>                              | Gering belästigt                             | 329                                                      | 88,0%      | 45                         | 12,0%      |
|                                                             | Mittelgradig belästigt                       | 410                                                      | 78,1%      | 115                        | 21,9%      |
|                                                             | Stark belästigt                              | 82                                                       | 66,1%      | 42                         | 33,9%      |
| <b>Lärmempfindlichkeit</b>                                  | Nicht lärmempfindlich                        | 232                                                      | 84,7%      | 42                         | 15,3%      |
|                                                             | Durchschnittlich                             | 460                                                      | 79,6%      | 118                        | 20,4%      |
|                                                             | Sehr lärmempfindlich                         | 129                                                      | 75,4%      | 42                         | 24,6%      |
| <b>Lebensbedingungen (Summenscore)</b>                      | Nicht gut                                    | 3 (*)                                                    | 60,0%      | 2 (*)                      | 40,0%      |
|                                                             | Durchschnittlich                             | 519                                                      | 77,8%      | 148                        | 22,2%      |
|                                                             | Sehr gut                                     | 299                                                      | 85,2%      | 52                         | 14,8%      |

\* zu geringe Fallzahlen für solide Auswertungen

Befragte, die sich als stark lärmempfindlich einstufen, dem Lärm stark ausgesetzt sehen, ihre Lebens- und Wohnbedingungen schlechter einstufen, sich vom Lärm stark belästigt fühlen, oder der Meinung sind, es sei in Innsbruck lauter als in anderen vergleichbaren österreichischen Städten schlafen deutlich häufiger bei geschlossenen Fenstern, als jene die sich weniger ausgesetzt und/oder gestört fühlen bzw. weniger lärmempfindlich sind etc. Jedoch schlafen auch in diesen Extremgruppen rund zwei Drittel häufig bis immer bei geöffneten / gekippten Fenstern.

Deutlich zeigt sich der Zusammenhang zur gegebenen Straßenverkehrslärmbelastung:

**Abbildung 101: Nachtschlaf bei geöffnetem oder gekipptem Fenster und nächtliche Straßenverkehrslärmbelastung  $L_n$  in 10-dB Schritten im Mittelwertvergleich**

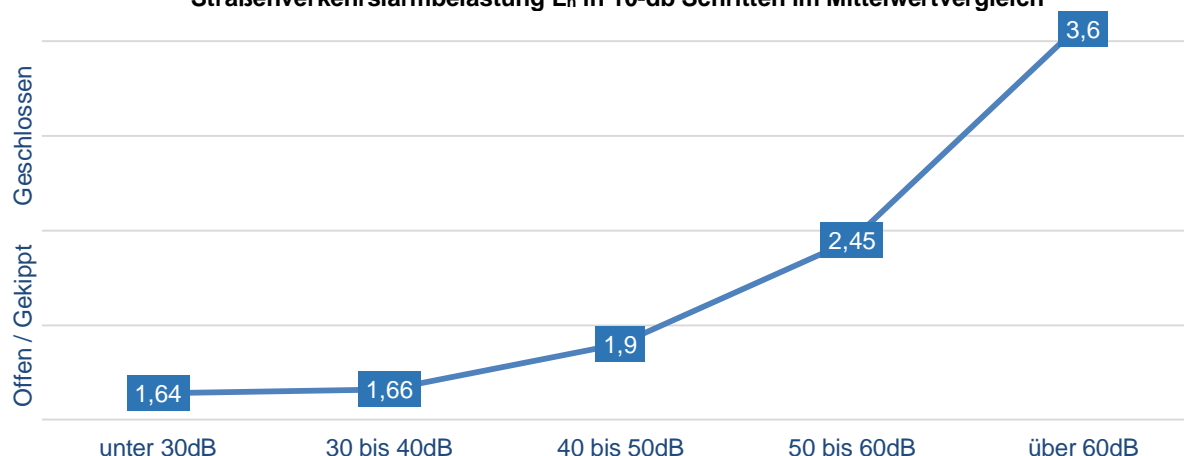

Die Flugverkehrslärmpegel in der Nacht fallen sehr niedrig aus und haben keinen eindeutigen Einfluss auf das Schlafverhalten. Der Anteil an Befragten, die mit geöffnetem / gekipptem Fenster schlafen, entspricht dem Gesamtkollektiv.

Interessant ist die Zusammenschau mit den nächtlichen Schienenverkehrslärmbelastungen: Diese weisen (auch statistisch) keinen starken Zusammenhang zum Schlafverhalten der Innsbruckerinnen und Innsbrucker auf und auch höhere Lärmpegel in der Nacht führen nur zu einem vergleichsweise geringfügig geänderten Schlafverhalten in Bezug auf geöffnete oder geschlossene Fenster:

**Tabelle 94: Nachtschlaf bei geöffnetem oder gekipptem Fenster und nächtliche Lärmbelastung  $L_n$  nach Quelle (gruppiert)**

| Nachtschlaf bei offenem oder gekippten Fenster gruppiert |                               |                                 |            |                            |            |
|----------------------------------------------------------|-------------------------------|---------------------------------|------------|----------------------------|------------|
|                                                          |                               | Fenster nachts geöffnet/gekippt |            | Fenster nachts geschlossen |            |
|                                                          |                               | Anzahl                          | Zeilen (%) | Anzahl                     | Zeilen (%) |
| <b>Straßenlärm 24h</b>                                   | Stark belastet >55dB          | 372                             | 72,7%      | 140                        | 27,3%      |
|                                                          | Mittelgradig belastet 45-55dB | 345                             | 86,3%      | 55                         | 13,8%      |
|                                                          | Gering belastet <45dB         | 104                             | 93,7%      | 7                          | 6,3%       |
| <b>Straßenlärm Nacht</b>                                 | Stark belastet >55dB          | 67                              | 63,8%      | 38                         | 36,2%      |
|                                                          | Mittelgradig belastet 45-55dB | 337                             | 75,9%      | 107                        | 24,1%      |
|                                                          | Gering belastet <45dB         | 417                             | 88,0%      | 57                         | 12,0%      |
| <b>Autobahnlärm Nacht</b>                                | Stark belastet >55dB          | 2 (*)                           | 100,0%     | 0 (*)                      | 0,0%       |
|                                                          | Mittelgradig belastet 45-55dB | 52                              | 83,9%      | 10                         | 16,1%      |
|                                                          | Gering belastet <45dB         | 767                             | 80,0%      | 192                        | 20,0%      |

|                           |                               |       |        |       |       |
|---------------------------|-------------------------------|-------|--------|-------|-------|
| <b>Schienenlärm Nacht</b> | Stark belastet >55dB          | 15    | 75,0%  | 5     | 25,0% |
|                           | Mittelgradig belastet 45-55dB | 126   | 74,1%  | 44    | 25,9% |
|                           | Gering belastet <45dB         | 680   | 81,6%  | 153   | 18,4% |
| <b>Fluglärm Nacht</b>     | Stark belastet >55dB          | 0 (*) | 0,0%   | 0 (*) | 0,0%  |
|                           | Mittelgradig belastet 45-55dB | 4 (*) | 100,0% | 0 (*) | 0,0%  |
|                           | Gering belastet <45dB         | 817   | 80,2%  | 202   | 19,8% |

\* zu geringe Fallzahlen für solide Auswertungen

# Lärmexpositionsempfinden

## 1. Überblick empfundene Lärmexposition

### 1.1. Lärmexposition nach Lärmquelle

Die Einschätzung der Ausgesetzttheit der eigenen Wohnung / des eigenen Hauses wurde für jede einzelne Lärmquelle mittels einer 11-teiligen Skala von *gar nicht* bis *äußerst stark* abgefragt.

Im Mittelwertvergleich zeigt sich, dass die Exposition dem Flugverkehrslärm gegenüber im Mittel am höchsten eingeschätzt wird, gefolgt von der Ausgesetzttheit gegenüber Straßenverkehrslärm:<sup>9</sup>

**Abbildung 102: Mittelwertvergleich der empfundenen Exposition nach Quelle**

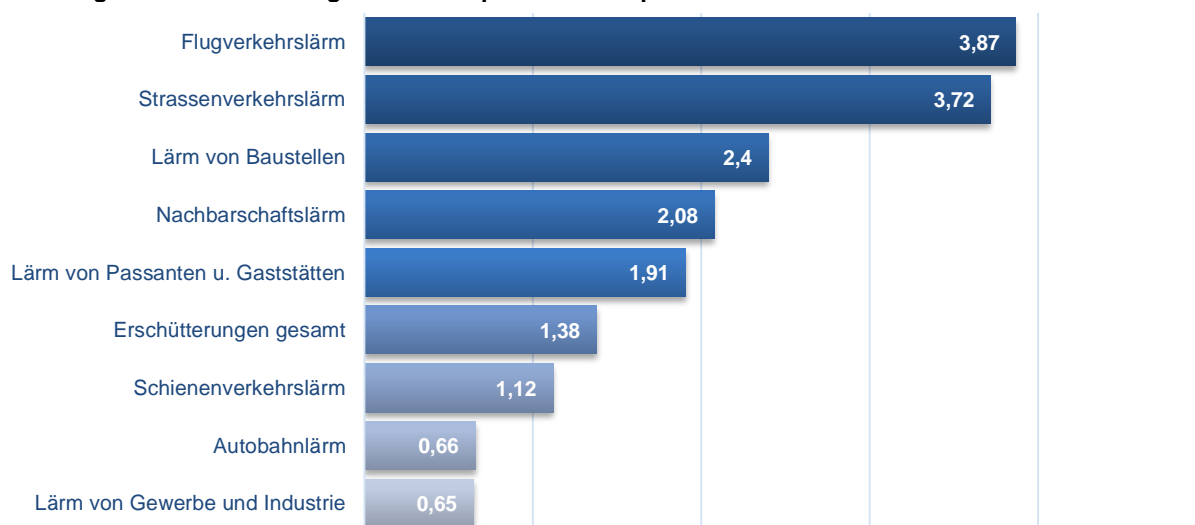

Erst mit deutlichem Abstand folgen Bau- und Nachbarschaftslärm, sowie die weiteren erfassten Lärmquellen und die Erschütterungsexposition. Die Ausgesetzttheit der eigenen Wohnung / des eigenen Hauses gegenüber Schienenverkehrs- und Autobahnlärm, sowie dem Lärm von Gewerbe und Industrie ist für die befragten Innsbruckerinnen und Innsbrucker im Durchschnitt nur gering ausgeprägt:

**Tabelle 95: Mittelwerte der empfundenen Exposition nach Quelle**

|                       | Flugverkehr   | Strassenverkehr | Baustellen    | Nachbarschaft | Passanten u. Gaststätten | Erschütterungen gesamt | Schienenverkehr | Autobahn      | Gewerbe und Industrie |
|-----------------------|---------------|-----------------|---------------|---------------|--------------------------|------------------------|-----------------|---------------|-----------------------|
| Mittelwert            | 3,87          | 3,72            | 2,40          | 2,08          | 1,91                     | 1,38                   | 1,12            | ,66           | ,65                   |
| N                     | 1031          | 1031            | 1031          | 1031          | 1031                     | 1031                   | 1031            | 1031          | 1031                  |
| Standardabweichung    | 2,943         | 2,921           | 3,074         | 2,581         | 2,622                    | 2,380                  | 2,208           | 1,711         | 1,735                 |
| Standardfehler des MW | ,092          | ,091            | ,096          | ,080          | ,082                     | ,074                   | ,069            | ,053          | ,054                  |
| Minimum               | gar nicht     | gar nicht       | gar nicht     | gar nicht     | gar nicht                | gar nicht              | gar nicht       | gar nicht     | gar nicht             |
| Maximum               | äußerst stark | äußerst stark   | äußerst stark | äußerst stark | äußerst stark            | äußerst stark          | äußerst stark   | äußerst stark | äußerst stark         |

<sup>9</sup> Anm.: Die eigenständige Frage nach der empfundenen Ausgesetzttheit des eigenen Hauses / der eigenen Wohnung gegenüber *Lärm insgesamt* wird in den folgenden vergleichenden Zusammenstellungen der einzelnen Lärmquellen ausgeklammert und im anschließenden Unterkapitel dargestellt.

Der Mittelwert aller Antworten über alle 9 Fragen hinweg liegt bei 1,98 (21,8%).

Kategorisiert in 3 Expositionsgruppen:

- **gering ausgesetzt:** gruppierte Antwortkategorien 0 [=gar nicht]), 1 und 2
- **mittelgradig ausgesetzt:** gruppierte Antwortkategorien 3 bis 7
- **stark ausgesetzt (highly exposed):** gruppierte Antwortkategorien 8, 9 u. 10 [=äußerst stark])

stellt sich die empfundene Exposition der eigenen Wohnung / des eigenen Hauses wie folgt dar:

**Abbildung 103: Empfundene Exposition nach Quelle kategorisiert in 3 Expositionsgruppen in Prozent**

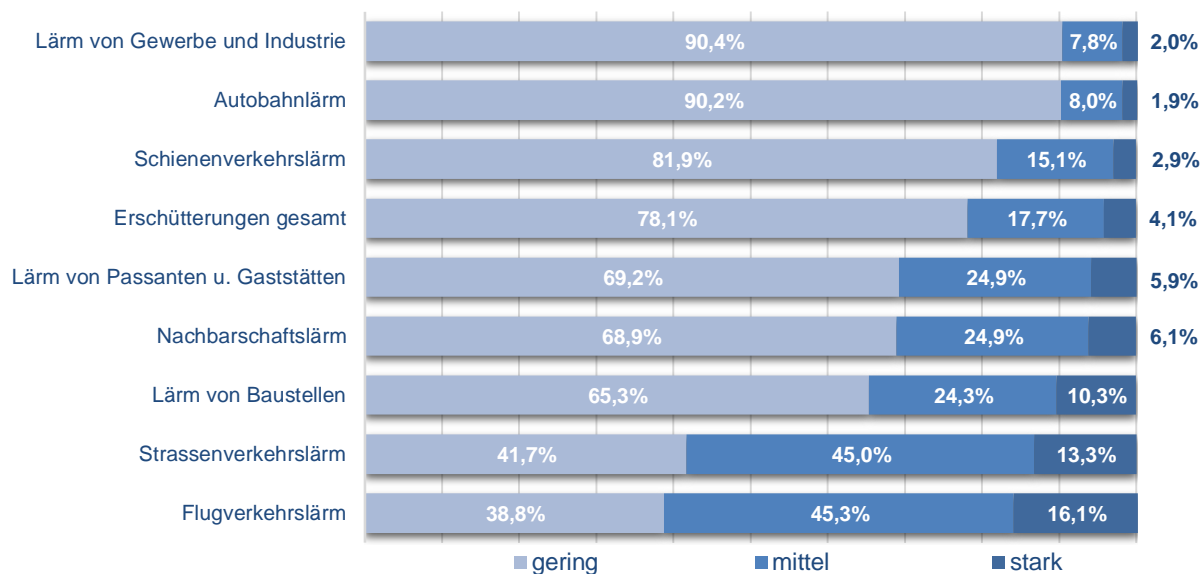

\* Nach empfundenem Expositionsausmaß (Mittelwert) aufsteigend sortiert

Wird nur die Extremgruppe der sich stark ausgesetzt fühlenden Befragten (*highly exposed*) betrachtet, zeigt sich im Vergleich der Quellen ein nahezu unverändertes Bild:

**Abbildung 104: Extremgruppenvergleich *highly exposed* nach Quelle in Prozent**

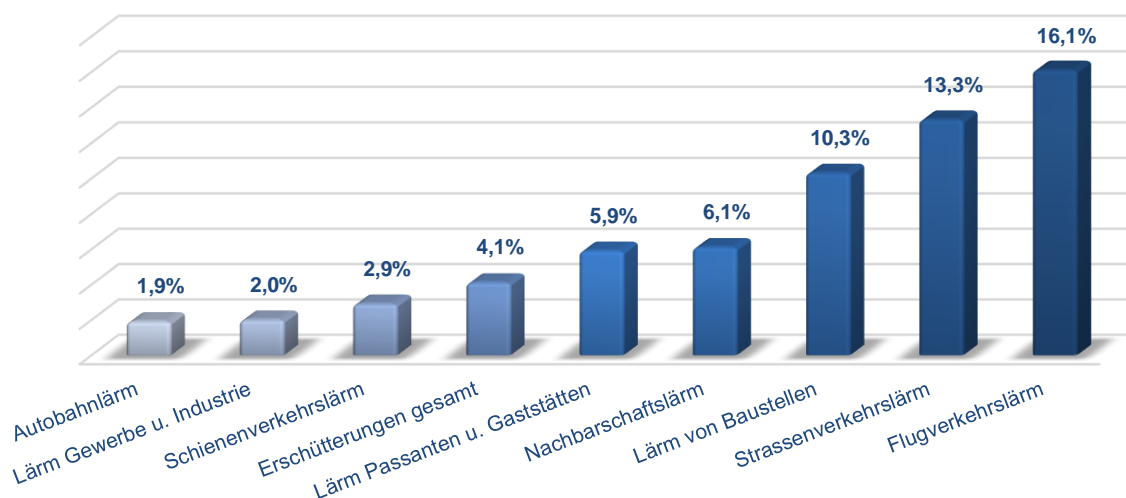

\* Nach empfundenem Expositionsausmaß (Häufigkeit) aufsteigend sortiert

## 1.2. Verkehrslärmexposition und – Belastung

Die empfundene Ausgesetzttheit gegenüber Verkehrslärm steht in deutlicher Beziehung zu den tatsächlich gegebenen Lärmpegeln der einzelnen Verkehrsträger (siehe dazu auch die folgenden Unterkapitel), variiert in Zusammenschau mit denselben allerdings je nach Quelle stark.

Weiters beginnt das Expositionsempfinden im sensibleren Nachtzeitraum im Vergleich zu den 24h-Pegeln bereits bei niedrigeren Lärmbelastungspegeln deutlich stärker zu steigen:

**Abbildung 105: Empfundene Lärmexposition und Verkehrslärmbelastung nach Quelle 24h- ( $L_{den}$ ) und Nachtzeitraum ( $L_n$ ) gruppiert im Mittelwertvergleich (aufsteigend sortiert)**

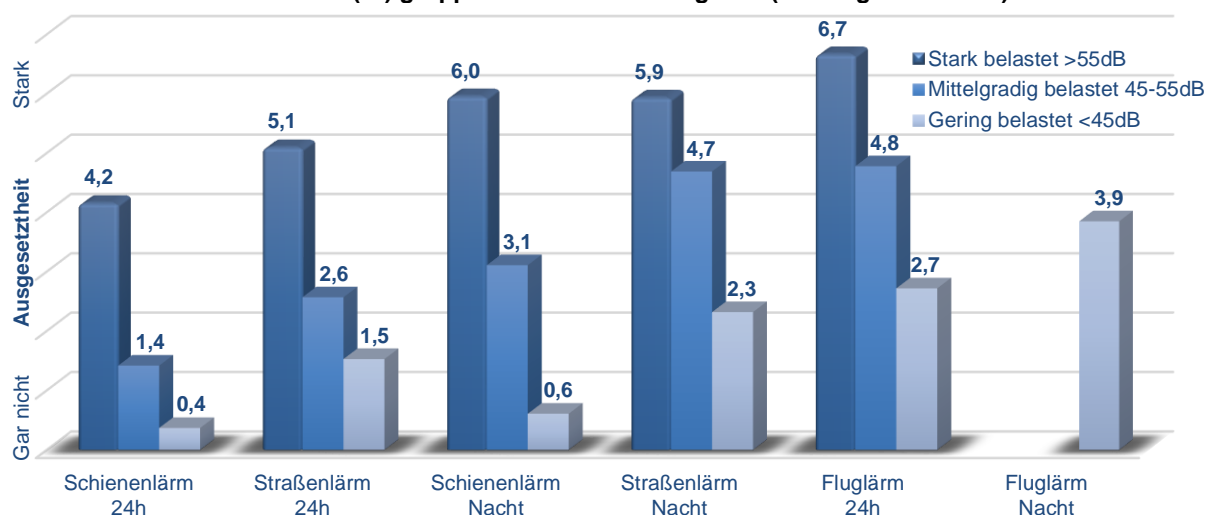

Anm.: In der Nacht gibt es keine vom Fluglärm stark belasteten Befragten und nur 4 mittelgradig Belastete, weshalb diese Belastungskategorien in der obenstehenden Grafik nicht wiedergegeben werden.

Etwas detaillierter ist dies aus dem Vergleich zwischen der empfundenen Lärmexposition und der gegebenen Lärmbelastung durch Straßen- und Flugverkehr jeweils im 24h-Zeitraum ( $L_{den}$ ) und im Nachtzeitraum ( $L_n$ ) ablesbar:

**Abbildung 106: Empfundene Lärmexposition und Lärmbelastung durch Straßen- und Flugverkehr im 24h- ( $L_{den}$ ) und Nachtzeitraum ( $L_n$ ) in 10dB-Schritten im Mittelwertvergleich (absteigend sortiert)**

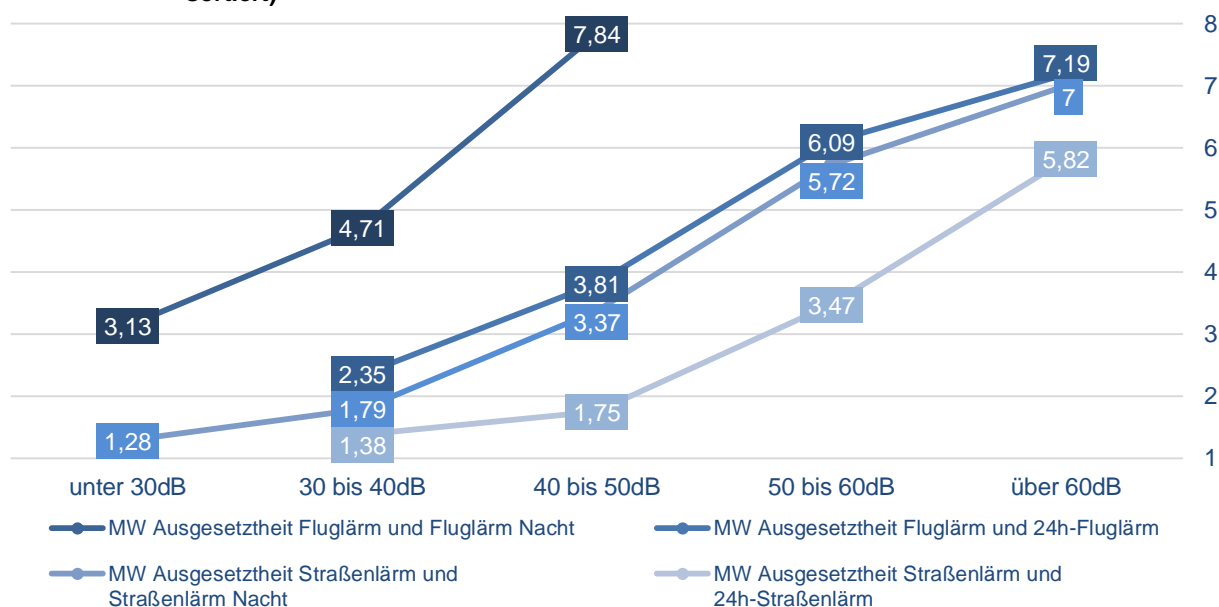

Das gemittelte Empfinden einer verstärkten Ausgesetzttheit gegenüber Flugverkehrslärm in der Nacht beginnt bei niedrigen Lärmpegeln, ist in allen Lärmbelastungskategorien deutlich höher als beim Straßenverkehr und übertrifft auch im 24h-Zeitraum das Gefühl der eigenen Lärmexposition gegenüber dem nächtlichen Straßenverkehr.

Das Lärmexpositionsempfinden gegenüber der gegebenen Schienenverkehrslärmbelastung liegt unterhalb dieser Werte und beginnt erst bei vergleichsweise höheren Lärmpegeln stärker anzusteigen:

**Abbildung 107: Empfundene Lärmexposition und Schienenverkehrslärmbelastung im 24h- ( $L_{den}$ ) und Nachtzeitraum ( $L_n$ ) in 10dB-Schritten im Mittelwertvergleich**

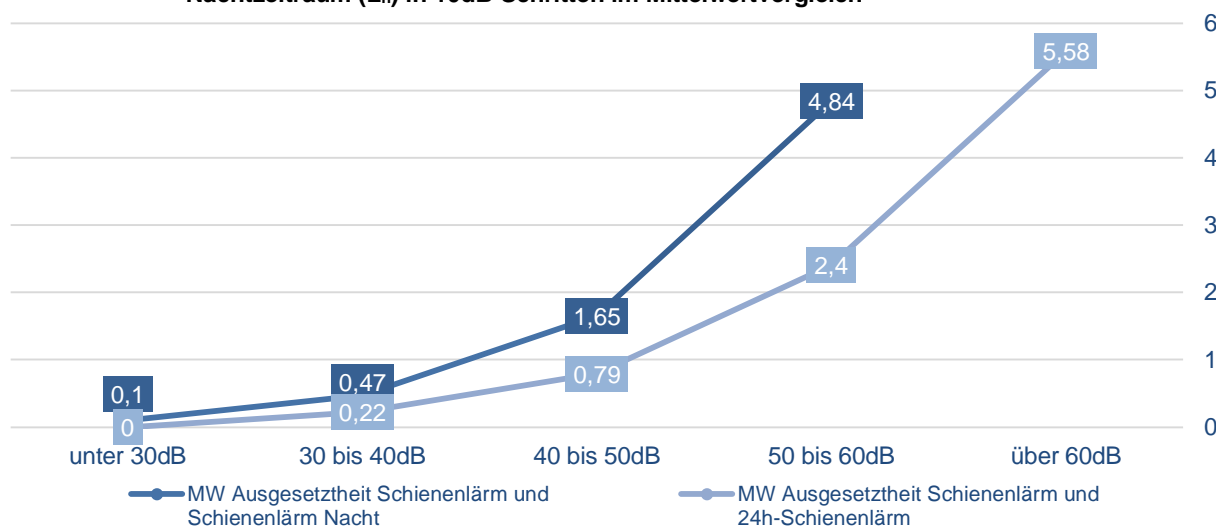

## 2. Lärmexposition insgesamt

Das Empfinden der Ausgesetzttheit des eigenen Hauses / der eigenen Wohnung gegenüber Lärm insgesamt wurde mittels eines eigenen Items zusätzlich abgefragt:

**Abbildung 108: Empfundene Lärmexposition insgesamt in Prozent**

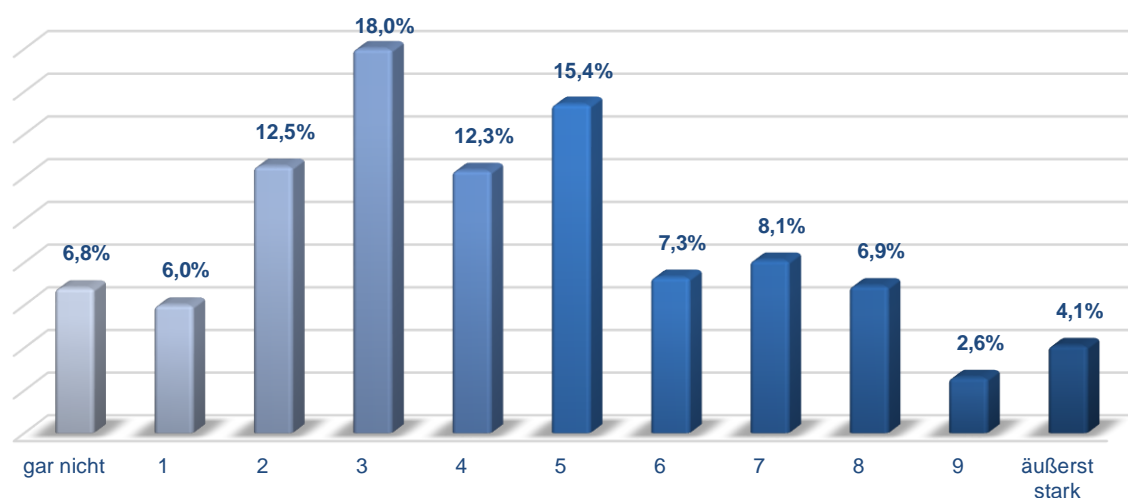

13,6% aller befragten Innsbruckerinnen und Innsbrucker schätzen ihre Wohnung / das Haus in dem sie leben, dem Lärm insgesamt als stark ausgesetzt (*highly exposed*: gruppierte Antwortkategorien 8, 9 und 10 [=äußerst stark]) ein, 61% antworten in den mittleren Kategorien und etwas mehr als ein

Viertel aller Probandinnen und Probanden empfindet das eigene Wohnumfeld als gering dem Lärm insgesamt ausgesetzt (gruppierte Antwortkategorien 0 [=gar nicht], 1 und 2):

**Tabelle 96: Empfundene Lärmexposition insgesamt gruppiert**

|                        | Häufigkeit | Gültige Prozente | Kumulierte Prozente |
|------------------------|------------|------------------|---------------------|
| Gering exponiert       | 261        | 25,3             | 25,3                |
| Mittelgradig exponiert | 630        | 61,1             | 86,4                |
| Stark exponiert        | 140        | 13,6             | 100,0               |
| Gesamt                 | 1031       | 100,0            |                     |

Im Mittel liegen die Antworten der befragten Probandinnen und Probanden bei 4,31 (47,4%). Nur knapp 7% aller Befragten sehen sich in ihrem Wohnumfeld Lärm insgesamt überhaupt nicht ausgesetzt.

## 2.1. Lärmexposition insgesamt und Katastralgemeinden

Im Mittel die größte Lärmexposition insgesamt wird in Wilten empfunden, gefolgt von Innsbruck, Pradl und Hötting. Die geringste Ausgesetzttheit gegenüber Lärm insgesamt im eigenen Wohnumfeld empfinden die Befragten in Mühlau, Igls und Vill:

**Abbildung 109: Empfundene Lärmexposition insgesamt und Katastralgemeinden im Mittelwertvergleich**

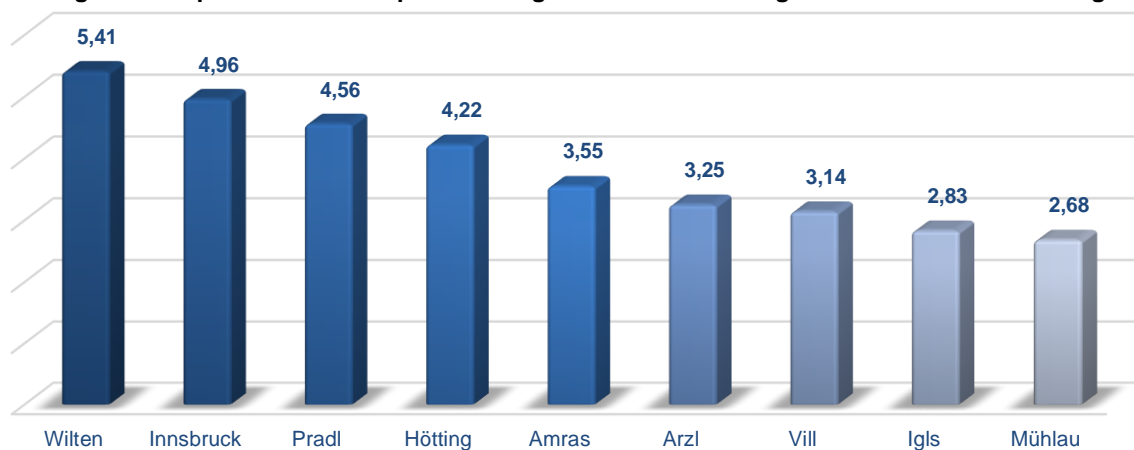

## 2.2. Lärmexposition insgesamt und ausgewählte Parameter

Die klassischen demographischen Parameter Geschlecht, Alter und Bildung zeigen in Zusammenschau mit der Frage nach der empfundenen Lärmexposition insgesamt nur vergleichsweise geringe Unterschiede in ihren Subgruppen.

Befragte Innsbruckerinnen und Innsbrucker,



- deren Wohnung durch bauliche Abschirmungen (Gebäude, Mauern etc.) vor Verkehrslärm weitestgehend geschützt sind,
  - die häufig bei geöffnetem oder gekipptem Fenster schlafen,
  - die über keine Lärmschutzfenster verfügen,
- empfinden sich dem Lärm insgesamt weniger ausgesetzt.

Auch bei den subjektiven Parametern wird der deutliche Einfluss der Disposition deutlich, die auch nach Adjustierung mit den gegebenen Verkehrslärmpegeln erhalten bleibt: Befragte, welche

- ihre Lebensbedingungen und ihre Lebensqualität besser einschätzen,
- zufriedener mit ihrer Wohnsituation insgesamt sind,
- von keiner Zunahme der Lärmbelastungen in Innsbruck in den vergangenen Jahren ausgehen,
- Innsbruck im Vergleich zu anderen Städten Österreichs für ruhiger halten,
- keine Notwendigkeit für (weitere) Maßnahmen zur Lärmreduktion sehen,
- sich selbst als weniger lärmempfindlich einstufen,

fühlen sich weniger häufig und in geringerem Ausmaß lärmexponiert:

**Tabelle 97: Empfundene Lärmexposition insgesamt und ausgewählte Parameter (gruppiert)**

|                                                             |                           | Ausgesetztheit Lärm gesamt gruppiert |            |                        |            |                 |            |
|-------------------------------------------------------------|---------------------------|--------------------------------------|------------|------------------------|------------|-----------------|------------|
|                                                             |                           | Gering exponiert                     |            | Mittelgradig exponiert |            | Stark exponiert |            |
|                                                             |                           | Anzahl                               | Zeilen (%) | Anzahl                 | Zeilen (%) | Anzahl          | Zeilen (%) |
| <b>Geschlecht</b>                                           | weiblich                  | 129                                  | 23,8%      | 330                    | 61,0%      | 82              | 15,2%      |
|                                                             | männlich                  | 132                                  | 26,9%      | 300                    | 61,2%      | 58              | 11,8%      |
| <b>Altersgruppen</b>                                        | 18 bis 40 Jahre           | 99                                   | 22,5%      | 277                    | 63,0%      | 64              | 14,5%      |
|                                                             | 41 bis 60 Jahre           | 83                                   | 26,3%      | 195                    | 61,7%      | 38              | 12,0%      |
|                                                             | über 60 Jahre             | 79                                   | 28,7%      | 158                    | 57,5%      | 38              | 13,8%      |
| <b>Bildungsschicht</b>                                      | Primärer Schulabschluss   | 28                                   | 28,6%      | 53                     | 54,1%      | 17              | 17,3%      |
|                                                             | Sekundärer Schulabschluss | 118                                  | 21,8%      | 358                    | 66,1%      | 66              | 12,2%      |
|                                                             | Tertiärer Schulabschluss  | 113                                  | 29,1%      | 218                    | 56,2%      | 57              | 14,7%      |
| <b>Baulicher Schutz vor Verkehrslärm</b>                    | Keiner bis geringfügig    | 174                                  | 22,7%      | 473                    | 61,7%      | 119             | 15,5%      |
|                                                             | Gut bis komplett          | 77                                   | 32,6%      | 141                    | 59,7%      | 18              | 7,6%       |
| <b>Innenhof bzw. lärm-abgewandte Seite</b>                  | Ja                        | 174                                  | 24,8%      | 447                    | 63,8%      | 80              | 11,4%      |
|                                                             | Nein                      | 80                                   | 26,0%      | 172                    | 55,8%      | 56              | 18,2%      |
| <b>Nachtschlaf</b>                                          | Fenster geöffnet/gekippt  | 226                                  | 27,5%      | 508                    | 61,9%      | 87              | 10,6%      |
|                                                             | Fenster geschlossen       | 31                                   | 15,3%      | 119                    | 58,9%      | 52              | 25,7%      |
| <b>Lärmschutzfenster in den letzten 10 Jahren eingebaut</b> | Ja                        | 25                                   | 13,4%      | 119                    | 63,6%      | 43              | 23,0%      |
|                                                             | Nein                      | 197                                  | 29,3%      | 400                    | 59,5%      | 75              | 11,2%      |
| <b>Lebensbedingungen (Summenscore)</b>                      | weiß nicht/ k.A.          | 39                                   | 22,7%      | 111                    | 64,5%      | 22              | 12,8%      |
|                                                             | Nicht gut                 | 0                                    | 0,0%       | 3 (*)                  | 60,0%      | 2 (*)           | 40,0%      |
|                                                             | Durchschnittlich          | 142                                  | 21,2%      | 422                    | 63,0%      | 106             | 15,8%      |
|                                                             | Sehr gut                  | 119                                  | 33,4%      | 205                    | 57,6%      | 32              | 9,0%       |

|                                                             |                        |       |       |       |       |     |       |
|-------------------------------------------------------------|------------------------|-------|-------|-------|-------|-----|-------|
| <b>Zufriedenheit</b>                                        | Nicht zufrieden        | 5     | 17,9% | 8     | 28,6% | 15  | 53,6% |
| <b>Wohnsituation</b>                                        | Durchschnittlich       | 34    | 13,2% | 163   | 63,2% | 61  | 23,6% |
| <b>insgesamt</b>                                            | Sehr zufrieden         | 222   | 29,8% | 458   | 61,6% | 64  | 8,6%  |
| <b>Lebensqualität</b>                                       | Nicht gut              | 2 (*) | 20,0% | 3 (*) | 30,0% | 5   | 50,0% |
|                                                             | Durchschnittlich       | 47    | 16,2% | 186   | 64,1% | 57  | 19,7% |
|                                                             | Sehr gut               | 210   | 29,0% | 437   | 60,3% | 78  | 10,8% |
| <b>Lärmempfindlichkeit</b>                                  | Nicht lärmempfindlich  | 100   | 36,4% | 150   | 54,5% | 25  | 9,1%  |
|                                                             | Durchschnittlich       | 115   | 19,7% | 385   | 65,9% | 84  | 14,4% |
|                                                             | Sehr lärmempfindlich   | 46    | 26,7% | 95    | 55,2% | 31  | 18,0% |
| <b>Gesundheitszustand</b>                                   | Gut                    | 197   | 26,1% | 453   | 60,1% | 104 | 13,8% |
|                                                             | Zufriedenstellend      | 43    | 23,1% | 123   | 66,1% | 20  | 10,8% |
|                                                             | Nicht gut              | 20    | 22,5% | 53    | 59,6% | 16  | 18,0% |
| <b>Zunahme</b>                                              | Ja                     | 56    | 12,8% | 285   | 65,4% | 95  | 21,8% |
| <b>Lärmbelastung</b>                                        | Nein                   | 205   | 34,5% | 345   | 58,0% | 45  | 7,6%  |
| <b>Abnahme</b>                                              | Ja                     | 17    | 29,3% | 37    | 63,8% | 4   | 6,9%  |
| <b>Lärmbelastung</b>                                        | Nein                   | 244   | 25,1% | 593   | 60,9% | 136 | 14,0% |
| <b>Lautheit Innsbruck im Vergleich</b>                      | Ruhiger                | 85    | 29,1% | 180   | 61,6% | 27  | 9,2%  |
|                                                             | Gleich                 | 139   | 25,2% | 342   | 62,1% | 70  | 12,7% |
|                                                             | Lauter                 | 30    | 17,2% | 102   | 58,6% | 42  | 24,1% |
| <b>Notwendigkeit (weiterer) Maßnahmen zur Lärmreduktion</b> | Ja                     | 141   | 20,4% | 431   | 62,4% | 119 | 17,2% |
|                                                             | Nein                   | 72    | 37,5% | 106   | 55,2% | 14  | 7,3%  |
| <b>Belästigung Lärm gesamt</b>                              | Gering belästigt       | 202   | 53,4% | 167   | 44,2% | 9   | 2,4%  |
|                                                             | Mittelgradig belästigt | 55    | 10,4% | 408   | 77,3% | 65  | 12,3% |
|                                                             | Stark belästigt        | 4 (*) | 3,2%  | 55    | 44,0% | 66  | 52,8% |

(\*) Zu geringe Fallzahlen für solide Auswertungen

Beinahe linear zeichnet sich der Zusammenhang zur Belästigung / Störung durch Lärm insgesamt ab, der stark ausgeprägt ist und das Empfinden der Ausgesetzttheit auch als Kontrollvariable bestätigt:

**Abbildung 110: Empfundene Lärmexposition insgesamt und Belästigung durch Lärm insgesamt im Mittelwertvergleich**

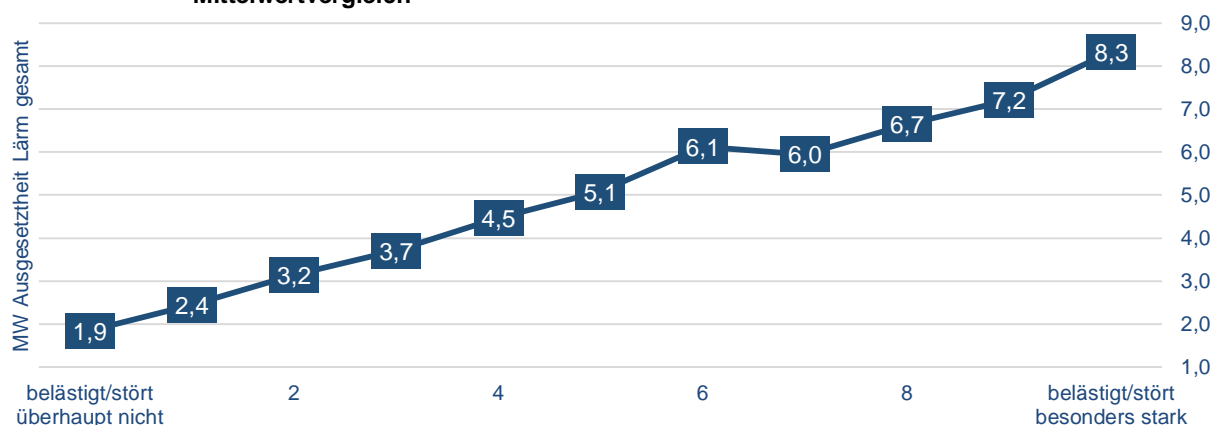

### 3. Flugverkehrslärmexposition

Knapp 39% aller Befragten sehen sich dem Flugverkehrslärm nicht stark ausgesetzt. Das Empfinden, wie sehr das persönliche Wohnumfeld der Befragten dem Flugverkehrslärm ausgesetzt ist, übertrifft allerdings in der Extremgruppe der sich stark ausgesetzt Empfindenden in seiner Häufigkeit (16%) die Spitzengruppe bei der Frage nach der Lärmexposition insgesamt und liegt auch vor dem Expositionsempfinden durch Straßenverkehrslärm:

**Abbildung 111: Empfundene Flugverkehrslärmexposition in Prozent**

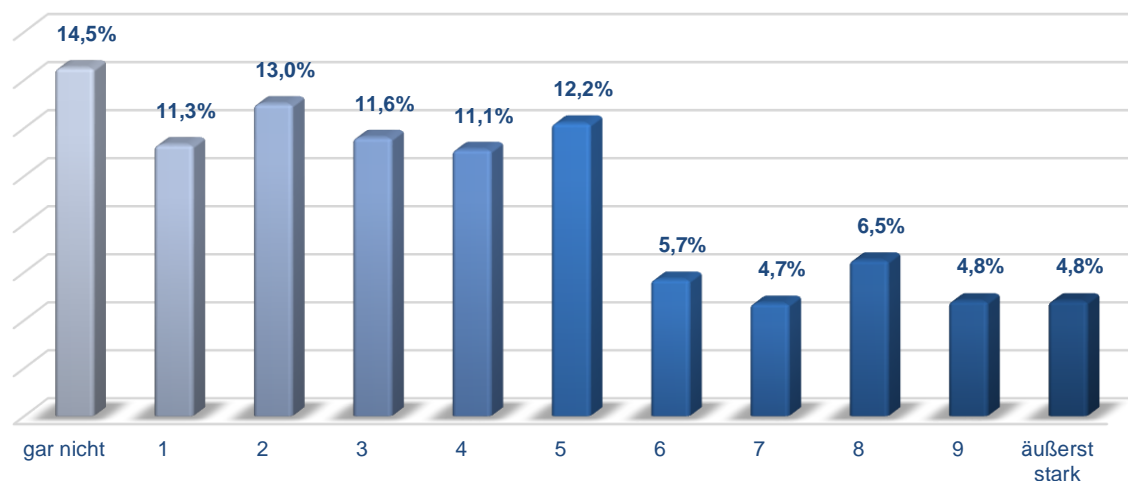

Im Mittel liegen die Antworten der befragten Probandinnen und Probanden bei 3,87 (42,6%) und damit wieder hinter dem Mittelwert der Antworten zur Frage nach der Lärmexposition insgesamt:

**Tabelle 98: Empfundene Flugverkehrslärmexposition gruppiert**

|                        | Häufigkeit | Gültige Prozente | Kumulierte Prozente |
|------------------------|------------|------------------|---------------------|
| Gering exponiert       | 399        | 38,7             | 38,7                |
| Mittelgradig exponiert | 467        | 45,3             | 84,0                |
| Stark exponiert        | 165        | 16,0             | 100,0               |
| Gesamt                 | 1031       | 100,0            |                     |

#### 3.1. Fluglärmexposition und Fluglärmbelastung

Die empfundene Ausgesetzttheit gegenüber Flugverkehrslärm korrespondiert sehr ausgeprägt mit der tatsächlich gegebenen Fluglärmbelastung und zeigt mit steigender gegebener Belastung ein nahezu linear ansteigendes Expositionsempfinden:

**Abbildung 112: Empfundene Flugverkehrslärmexposition und 24h-Fluglärmbelastung  $L_{den}$  in 10dB-Schritten im Mittelwertvergleich**

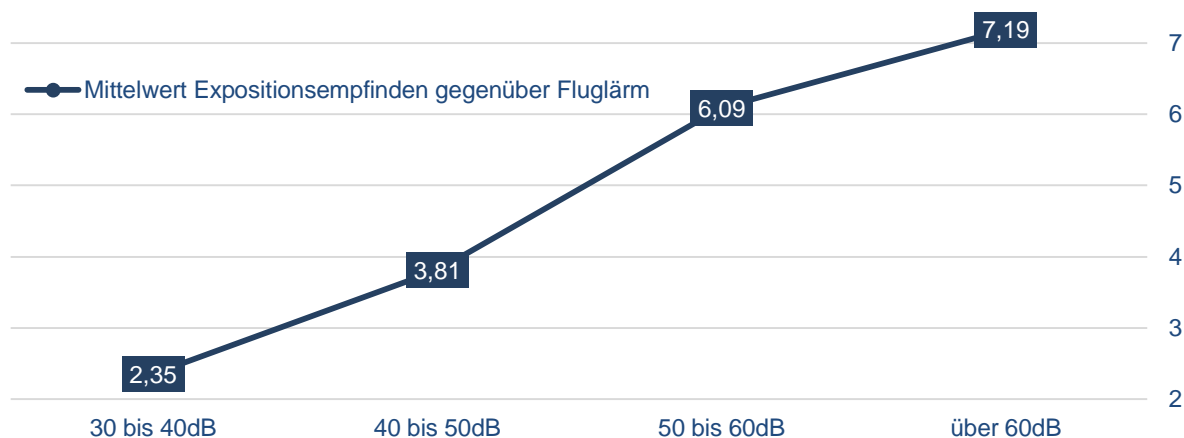

Das gilt auch für den Nachtzeitraum. Das verstärkte Expositionsempfinden beginnt jedoch bereits bei niedrigeren Lärmpegeln und ist deutlich stärker ausgeprägt:

**Abbildung 113: Empfundene Flugverkehrslärmexposition und nächtliche Fluglärmbelastung  $L_n$  in 10dB-Schritten im Mittelwertvergleich**

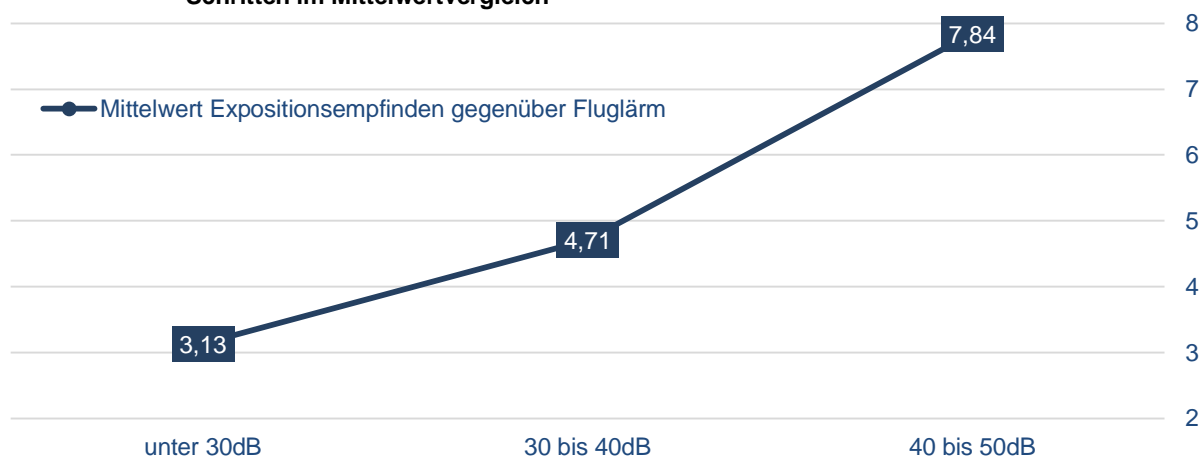

### 3.2. Fluglärmexposition und Katastralgemeinden

**Abbildung 114: Empfundene Fluglärmexposition und Katastralgemeinden im Mittelwertvergleich**

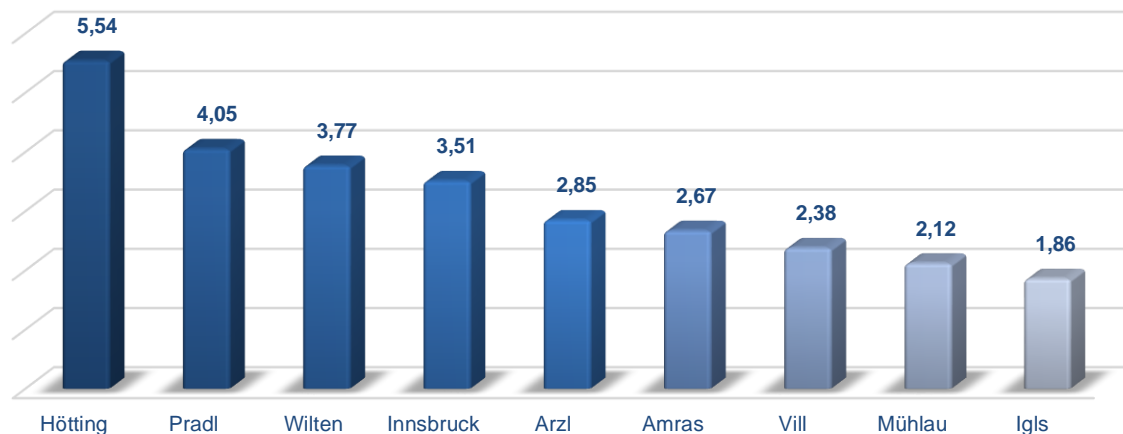

Entsprechend der gegebenen Fluglärmbelastung zeigt sich das mit Abstand stärkste Fluglärmexpositionsempfinden in Hötting. Die geringste Ausgesetztheit gegenüber Fluglärm im eigenen Wohnumfeld empfinden die Befragten in Igls.

### 3.3. Fluglärmexposition und ausgewählte Parameter

In der Kombination mit einzelnen Variablen zeigen sich sehr ähnliche Auswertungsergebnisse wie schon in der Zusammenschau mit der empfundenen Ausgesetztheit gegenüber Lärm insgesamt:

**Tabelle 99: Empfundene Fluglärmexposition und ausgewählte Parameter (gruppiert)**

|                                                             |                           | Ausgesetztheit Flugverkehrslärm gruppiert |            |                        |            |                 |            |
|-------------------------------------------------------------|---------------------------|-------------------------------------------|------------|------------------------|------------|-----------------|------------|
|                                                             |                           | Gering exponiert                          |            | Mittelgradig exponiert |            | Stark exponiert |            |
|                                                             |                           | Anzahl                                    | Zeilen (%) | Anzahl                 | Zeilen (%) | Anzahl          | Zeilen (%) |
| <b>Geschlecht</b>                                           | weiblich                  | 200                                       | 37,0%      | 253                    | 46,8%      | 88              | 16,3%      |
|                                                             | männlich                  | 199                                       | 40,6%      | 214                    | 43,7%      | 77              | 15,7%      |
| <b>Altersgruppen</b>                                        | 18 bis 40 Jahre           | 178                                       | 40,5%      | 188                    | 42,7%      | 74              | 16,8%      |
|                                                             | 41 bis 60 Jahre           | 117                                       | 37,0%      | 152                    | 48,1%      | 47              | 14,9%      |
|                                                             | über 60 Jahre             | 104                                       | 37,8%      | 127                    | 46,2%      | 44              | 16,0%      |
| <b>Bildungsschicht</b>                                      | Primärer Schulabschluss   | 38                                        | 38,8%      | 48                     | 49,0%      | 12              | 12,2%      |
|                                                             | Sekundärer Schulabschluss | 215                                       | 39,7%      | 248                    | 45,8%      | 79              | 14,6%      |
|                                                             | Tertiärer Schulabschluss  | 145                                       | 37,4%      | 169                    | 43,6%      | 74              | 19,1%      |
| <b>Baulicher Schutz vor Verkehrslärm</b>                    | Keiner bis geringfügig    | 295                                       | 38,5%      | 339                    | 44,3%      | 132             | 17,2%      |
|                                                             | Gut bis komplett          | 86                                        | 36,4%      | 119                    | 50,4%      | 31              | 13,1%      |
| <b>Innenhof bzw. lärm-abgewandte Seite</b>                  | Ja                        | 285                                       | 40,7%      | 324                    | 46,2%      | 92              | 13,1%      |
|                                                             | Nein                      | 106                                       | 34,4%      | 133                    | 43,2%      | 69              | 22,4%      |
| <b>Nachtschlaf</b>                                          | Fenster geöffnet/gekippt  | 319                                       | 38,9%      | 372                    | 45,3%      | 130             | 15,8%      |
|                                                             | Fenster geschlossen       | 76                                        | 37,6%      | 93                     | 46,0%      | 33              | 16,3%      |
| <b>Lärmschutzfenster in den letzten 10 Jahren eingebaut</b> | Ja                        | 56                                        | 29,9%      | 88                     | 47,1%      | 43              | 23,0%      |
|                                                             | Nein                      | 260                                       | 38,7%      | 312                    | 46,4%      | 100             | 14,9%      |
|                                                             | weiß nicht/ k.A.          | 83                                        | 48,3%      | 67                     | 39,0%      | 22              | 12,8%      |
| <b>Lebensbedingungen (Summenscore)</b>                      | Nicht gut (*)             | 1                                         | 20,0%      | 2                      | 40,0%      | 2               | 40,0%      |
|                                                             | Durchschnittlich          | 229                                       | 34,2%      | 317                    | 47,3%      | 124             | 18,5%      |
|                                                             | Sehr gut                  | 169                                       | 47,5%      | 148                    | 41,6%      | 39              | 11,0%      |
| <b>Zufriedenheit</b>                                        | Nicht zufrieden           | 10                                        | 35,7%      | 10                     | 35,7%      | 8               | 28,6%      |
| <b>Wohnsituation</b>                                        | Durchschnittlich          | 88                                        | 34,1%      | 118                    | 45,7%      | 52              | 20,2%      |
| <b>insgesamt</b>                                            | Sehr zufrieden            | 301                                       | 40,5%      | 338                    | 45,4%      | 105             | 14,1%      |
| <b>Lebensqualität</b>                                       | Nicht gut (*)             | 2                                         | 20,0%      | 4                      | 40,0%      | 4               | 40,0%      |
|                                                             | Durchschnittlich          | 103                                       | 35,5%      | 135                    | 46,6%      | 52              | 17,9%      |
|                                                             | Sehr gut                  | 292                                       | 40,3%      | 325                    | 44,8%      | 108             | 14,9%      |
| <b>Lärmempfindlichkeit</b>                                  | Nicht lärmempfindlich     | 134                                       | 48,7%      | 105                    | 38,2%      | 36              | 13,1%      |
|                                                             | Durchschnittlich          | 217                                       | 37,2%      | 278                    | 47,6%      | 89              | 15,2%      |

|                                                             |                        |       |       |     |       |     |       |
|-------------------------------------------------------------|------------------------|-------|-------|-----|-------|-----|-------|
|                                                             | Sehr lärmempfindlich   | 48    | 27,9% | 84  | 48,8% | 40  | 23,3% |
| <b>Gesundheitszustand</b>                                   | Gut                    | 298   | 39,5% | 342 | 45,4% | 114 | 15,1% |
|                                                             | Zufriedenstellend      | 75    | 40,3% | 79  | 42,5% | 32  | 17,2% |
|                                                             | Nicht gut              | 25    | 28,1% | 45  | 50,6% | 19  | 21,3% |
| <b>Zunahme</b>                                              | Ja                     | 133   | 30,5% | 206 | 47,2% | 97  | 22,2% |
| <b>Lärmbelastung</b>                                        | Nein                   | 266   | 44,7% | 261 | 43,9% | 68  | 11,4% |
| <b>Abnahme</b>                                              | Ja                     | 32    | 55,2% | 21  | 36,2% | 5   | 8,6%  |
| <b>Lärmbelastung</b>                                        | Nein                   | 367   | 37,7% | 446 | 45,8% | 160 | 16,4% |
| <b>Lautheit Innsbruck im Vergleich</b>                      | Ruhiger                | 123   | 42,1% | 120 | 41,1% | 49  | 16,8% |
|                                                             | Gleich                 | 220   | 39,9% | 248 | 45,0% | 83  | 15,1% |
|                                                             | Lauter                 | 50    | 28,7% | 91  | 52,3% | 33  | 19,0% |
| <b>Notwendigkeit (weiterer) Maßnahmen zur Lärmreduktion</b> | Ja                     | 232   | 33,6% | 323 | 46,7% | 136 | 19,7% |
|                                                             | Nein                   | 88    | 45,8% | 86  | 44,8% | 18  | 9,4%  |
| <b>Belästigung Fluglärm</b>                                 | Gering belästigt       | 365   | 71,6% | 135 | 26,5% | 10  | 2,0%  |
|                                                             | Mittelgradig belästigt | 33    | 8,3%  | 313 | 78,3% | 54  | 13,5% |
|                                                             | Stark belästigt        | 1 (*) | 0,8%  | 19  | 15,7% | 101 | 83,5% |

(\*) Zu geringe Fallzahlen für solide Auswertungen

## 4. Straßenverkehrslärmexposition

Das Ausmaß des Expositionsempfindens gegenüber Straßenverkehrslärm entspricht in seinen Dimensionen größtenteils dem Empfinden der Ausgesetzttheit des eigenen Wohnumfeldes gegenüber Flugverkehrslärm:

**Abbildung 115: Empfundene Straßenverkehrslärmexposition in Prozent**

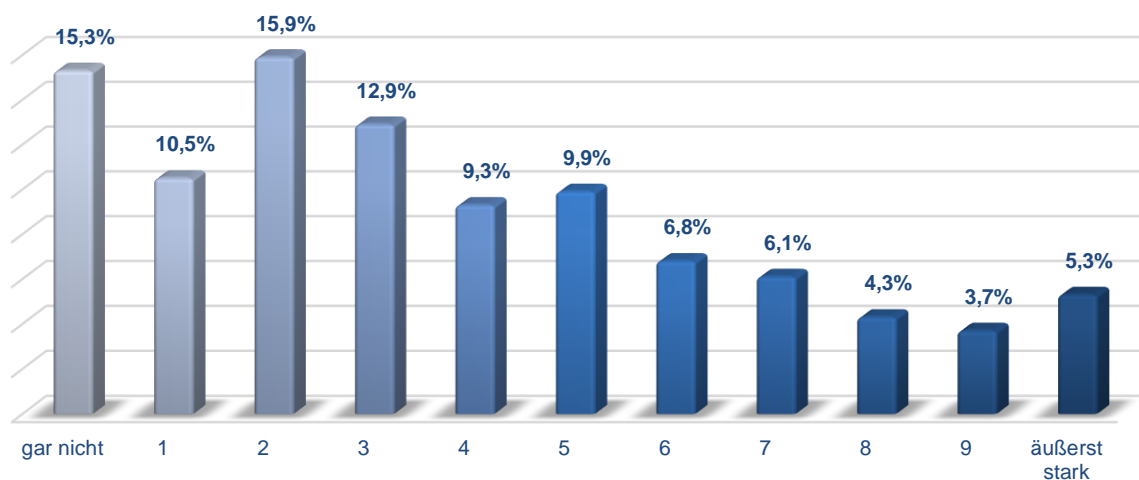

Im Mittel liegen die Antworten der Befragten bei 3,72 (40,9%).

**Tabelle 100: Empfundene Straßenverkehrslärmexposition gruppiert**

|                        | Häufigkeit | Gültige Prozente | Kumulierte Prozente |
|------------------------|------------|------------------|---------------------|
| Gering exponiert       | 430        | 41,7             | 41,7                |
| Mittelgradig exponiert | 464        | 45,0             | 86,7                |
| Stark exponiert        | 137        | 13,3             | 100,0               |
| Gesamt                 | 1031       | 100,0            |                     |

#### 4.1. Straßenlärmexposition und Straßenlärmbelastung

Auch in der Zusammenschau der empfundenen Straßenverkehrslärmexposition mit der gegebenen Straßenverkehrslärmbelastung zeigt sich ein deutlicher Bezug. Im Unterschied zum Expositionsempfinden beim Fluglärm steigt das Empfinden einen starken Exposition erst bei höheren gegebenen Lärmpegeln an und ist auch in der Kategorie der mit über 60dB-Dauerschallpegel stark belasteten Befragten geringer ausgeprägt als beim Empfinden der sich stark dem Flugverkehrslärm ausgesetzt und auch tatsächlich stark belasteten Befragten:

**Abbildung 116: Empfundene Straßenverkehrslärmexposition und 24h-Straßenverkehrslärmbelastung  $L_{den}$  in 10dB-Schritten im Mittelwertvergleich**

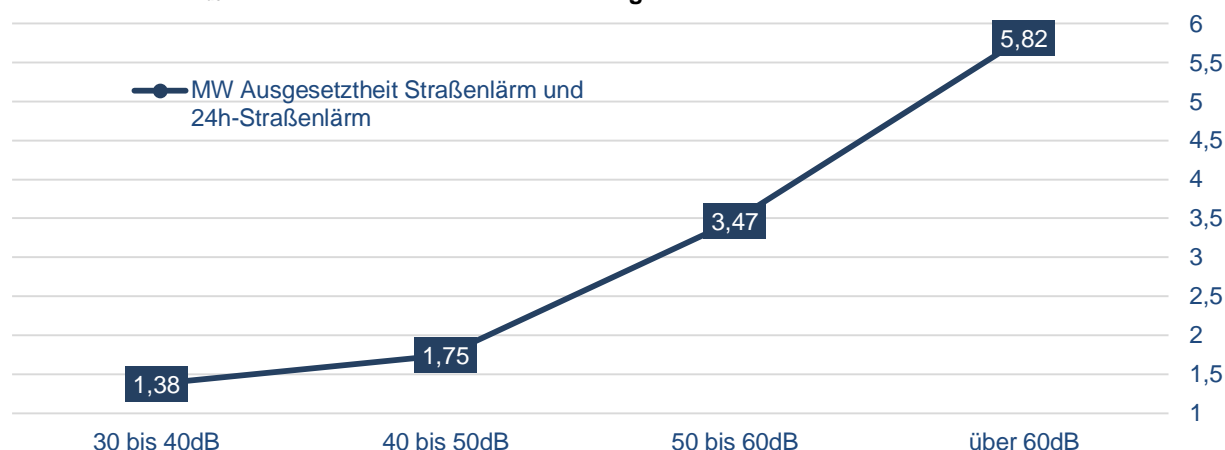

Wie schon beim Flugverkehrslärm zeigt sich auch beim Empfinden der eigenen Ausgesetzttheit gegenüber Straßenverkehrslärm eine ausgeprägt stärkere Sensitivität im Nachtzeitraum. Das Gefühl der der eigenen Ausgesetzttheit beginnt bereits bei niedrigeren Lärmpegeln, steigt stärker an und ist deutlich stärker ausgeprägt als im 24h-Zeitraum:

**Abbildung 117: Empfundene Straßenverkehrslärmexposition und nächtliche Straßenverkehrslärmbelastung  $L_n$  in 10dB-Schritten im Mittelwertvergleich**

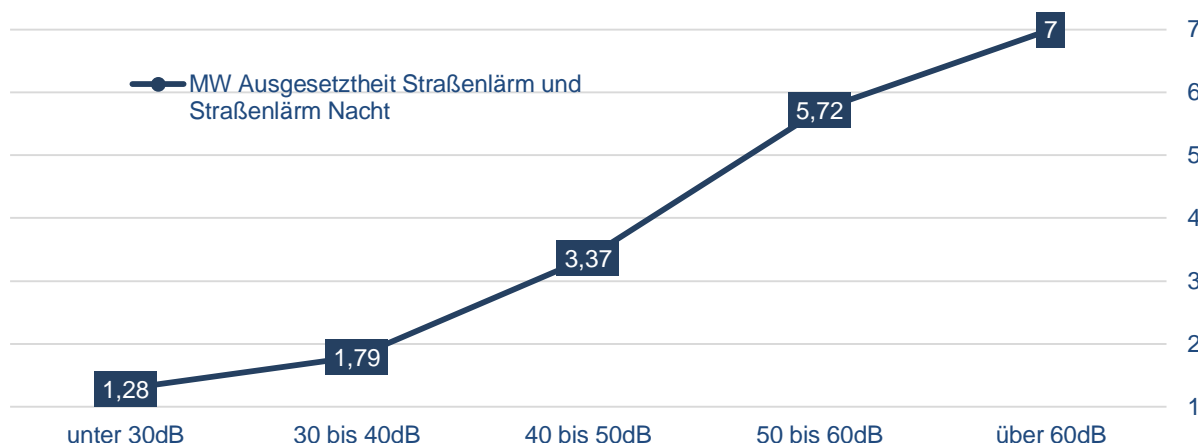

#### 4.2. Straßenlärmbelastung und Katastralgemeinden

Das größte Ausmaß an empfundener Straßenlärmbelastung wird mit deutlichem Abstand in Wilten empfunden, gefolgt von Pradl, Innsbruck und AmraS. Die geringste Ausgesetztheit gegenüber Straßenverkehrslärm im eigenen Wohnumfeld empfinden die Befragten in Igls, Mühlau und Vill:

**Abbildung 118: Empfundene Straßenlärmbelastung und Katastralgemeinden im Mittelwertvergleich**

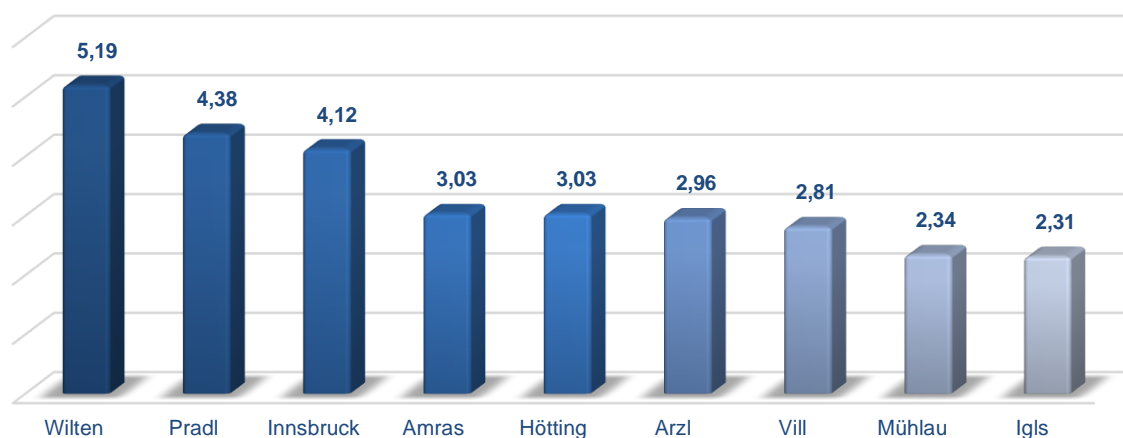

#### 4.3. Straßenlärmbelastung und ausgewählte Parameter

Frauen empfinden sich stärker dem Straßenverkehrslärm ausgesetzt als Männer, während das Alter und der höchste bisher erreichte Schulabschluss nur eine untergeordnete Rolle einnehmen.

Wiederum zeigen sich starke Beziehungen zu den verschiedenen Einschätzungsfragen der eigenen Wohn- und Lebensumstände: Je besser diese bewertet werden, desto weniger fühlen sich die befragten Innsbruckerinnen und Innsbrucker dem Straßenverkehrslärm ausgesetzt und vice versa.



Die stärkste Beziehung besteht erneut zum Ausmaß der Belästigung durch den Straßenverkehrslärm. Wie schon in Abhängigkeit von der Belästigung durch Flugverkehrslärm steigt das Ausmaß der empfundenen Ausgesetzttheit auch in Bezug zur Straßenverkehrslärmbelastigung nahezu linear an:

**Abbildung 119: Empfundene Straßenverkehrslärmexposition und Belästigung durch Straßenverkehrslärm im Mittelwertvergleich**

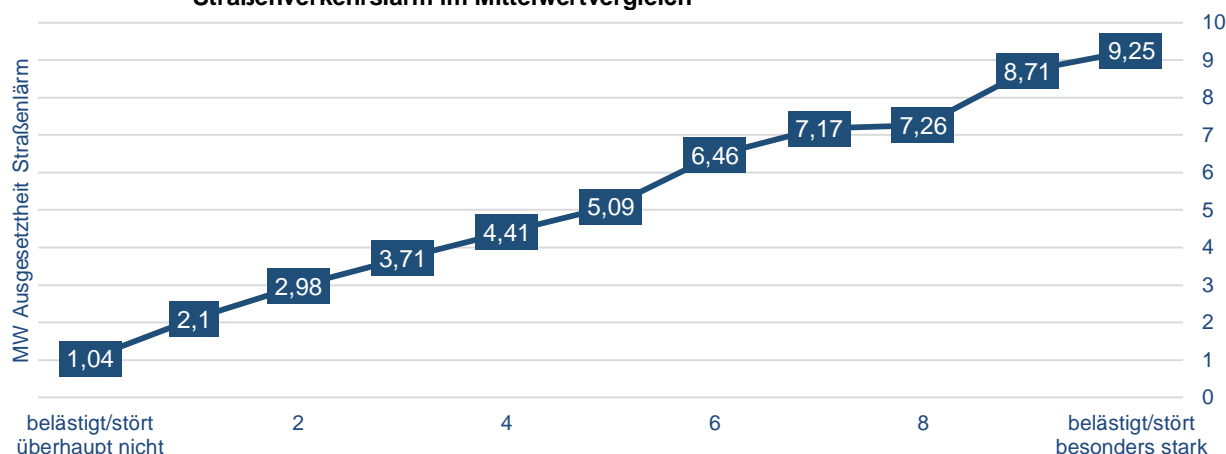

**Tabelle 101: Empfundene Straßenlärmbelastigung und ausgewählte Parameter (gruppiert)**

|                                                             |                          | Ausgesetzttheit Straßenverkehrslärm gruppiert |            |                        |            |                 |            |
|-------------------------------------------------------------|--------------------------|-----------------------------------------------|------------|------------------------|------------|-----------------|------------|
|                                                             |                          | Gering exponiert                              |            | Mittelgradig exponiert |            | Stark exponiert |            |
|                                                             |                          | Anzahl                                        | Zeilen (%) | Anzahl                 | Zeilen (%) | Anzahl          | Zeilen (%) |
| <b>Geschlecht</b>                                           | weiblich                 | 213                                           | 39,4%      | 246                    | 45,5%      | 82              | 15,2%      |
|                                                             | männlich                 | 217                                           | 44,3%      | 218                    | 44,5%      | 55              | 11,2%      |
| <b>Baulicher Schutz vor Verkehrslärm</b>                    | Keiner bis geringfügig   | 287                                           | 37,5%      | 357                    | 46,6%      | 122             | 15,9%      |
|                                                             | Gut bis komplett         | 132                                           | 55,9%      | 93                     | 39,4%      | 11              | 4,7%       |
| <b>Innenhof bzw. lärm-abgewandte Seite</b>                  | Ja                       | 293                                           | 41,8%      | 330                    | 47,1%      | 78              | 11,1%      |
|                                                             | Nein                     | 128                                           | 41,6%      | 124                    | 40,3%      | 56              | 18,2%      |
| <b>Nachtschlaf</b>                                          | Fenster geöffnet/gekippt | 372                                           | 45,3%      | 365                    | 44,5%      | 84              | 10,2%      |
|                                                             | Fenster geschlossen      | 53                                            | 26,2%      | 96                     | 47,5%      | 53              | 26,2%      |
| <b>Lärmschutzfenster in den letzten 10 Jahren eingebaut</b> | Ja                       | 59                                            | 31,6%      | 80                     | 42,8%      | 48              | 25,7%      |
|                                                             | Nein                     | 299                                           | 44,5%      | 303                    | 45,1%      | 70              | 10,4%      |
|                                                             | weiß nicht/ k.A.         | 72                                            | 41,9%      | 81                     | 47,1%      | 19              | 11,0%      |
| <b>Lebensbedingungen (Summenscore)</b>                      | Nicht gut (*)            | 2                                             | 40,0%      | 2                      | 40,0%      | 1               | 20,0%      |
|                                                             | Durchschnittlich         | 243                                           | 36,3%      | 319                    | 47,6%      | 108             | 16,1%      |
|                                                             | Sehr gut                 | 185                                           | 52,0%      | 143                    | 40,2%      | 28              | 7,9%       |
| <b>Zufriedenheit</b>                                        | Nicht zufrieden          | 12                                            | 42,9%      | 8                      | 28,6%      | 8               | 28,6%      |
| <b>Wohnsituation</b>                                        | Durchschnittlich         | 75                                            | 29,1%      | 118                    | 45,7%      | 65              | 25,2%      |
| <b>insgesamt</b>                                            | Sehr zufrieden           | 343                                           | 46,1%      | 338                    | 45,4%      | 63              | 8,5%       |
| <b>Lebensqualität</b>                                       | Nicht gut                | 5                                             | 50,0%      | 2 (*)                  | 20,0%      | 3 (*)           | 30,0%      |
|                                                             | Durchschnittlich         | 110                                           | 37,9%      | 124                    | 42,8%      | 56              | 19,3%      |
|                                                             | Sehr gut                 | 310                                           | 42,8%      | 338                    | 46,6%      | 77              | 10,6%      |
| <b>Lärmempfindlichkeit</b>                                  | Nicht lärmempfindlich    | 142                                           | 51,6%      | 111                    | 40,4%      | 22              | 8,0%       |

|                                                             |                        |       |       |     |       |     |       |
|-------------------------------------------------------------|------------------------|-------|-------|-----|-------|-----|-------|
|                                                             | Durchschnittlich       | 216   | 37,0% | 277 | 47,4% | 91  | 15,6% |
|                                                             | Sehr lärmempfindlich   | 72    | 41,9% | 76  | 44,2% | 24  | 14,0% |
| <b>Gesundheitszustand</b>                                   | Gut                    | 323   | 42,8% | 338 | 44,8% | 93  | 12,3% |
|                                                             | Zufriedenstellend      | 75    | 40,3% | 85  | 45,7% | 26  | 14,0% |
|                                                             | Nicht gut              | 30    | 33,7% | 41  | 46,1% | 18  | 20,2% |
| <b>Zunahme</b>                                              | Ja                     | 120   | 27,5% | 229 | 52,5% | 87  | 20,0% |
| <b>Lärmbelastung</b>                                        | Nein                   | 310   | 52,1% | 235 | 39,5% | 50  | 8,4%  |
| <b>Abnahme</b>                                              | Ja                     | 27    | 46,6% | 27  | 46,6% | 4   | 6,9%  |
| <b>Lärmbelastung</b>                                        | Nein                   | 403   | 41,4% | 437 | 44,9% | 133 | 13,7% |
| <b>Lautheit Innsbruck im Vergleich</b>                      | Ruhiger                | 133   | 45,5% | 132 | 45,2% | 27  | 9,2%  |
|                                                             | Gleich                 | 229   | 41,6% | 251 | 45,6% | 71  | 12,9% |
|                                                             | Lauter                 | 59    | 33,9% | 77  | 44,3% | 38  | 21,8% |
| <b>Notwendigkeit (weiterer) Maßnahmen zur Lärmreduktion</b> | Ja                     | 253   | 36,6% | 329 | 47,6% | 109 | 15,8% |
|                                                             | Nein                   | 109   | 56,8% | 70  | 36,5% | 13  | 6,8%  |
| <b>Belästigung Straßenlärm</b>                              | Gering belästigt       | 385   | 71,4% | 149 | 27,6% | 5   | 0,9%  |
|                                                             | Mittelgradig belästigt | 42    | 11,2% | 288 | 76,8% | 45  | 12,0% |
|                                                             | Stark belästigt        | 3 (*) | 2,6%  | 27  | 23,1% | 87  | 74,4% |

(\*) Zu geringe Fallzahlen für solide Auswertungen

## 5. Baustellenlärmexposition

Das Empfinden der Exposition durch den Lärm von Baustellen steht in seinem Ausmaß an dritter Stelle hinter dem Flug- und dem Straßenverkehrslärm, unterscheidet sich aber in seinen Ausprägungen sehr deutlich von diesen beiden:

Abbildung 120: Empfundene Baustellenlärmexposition in Prozent

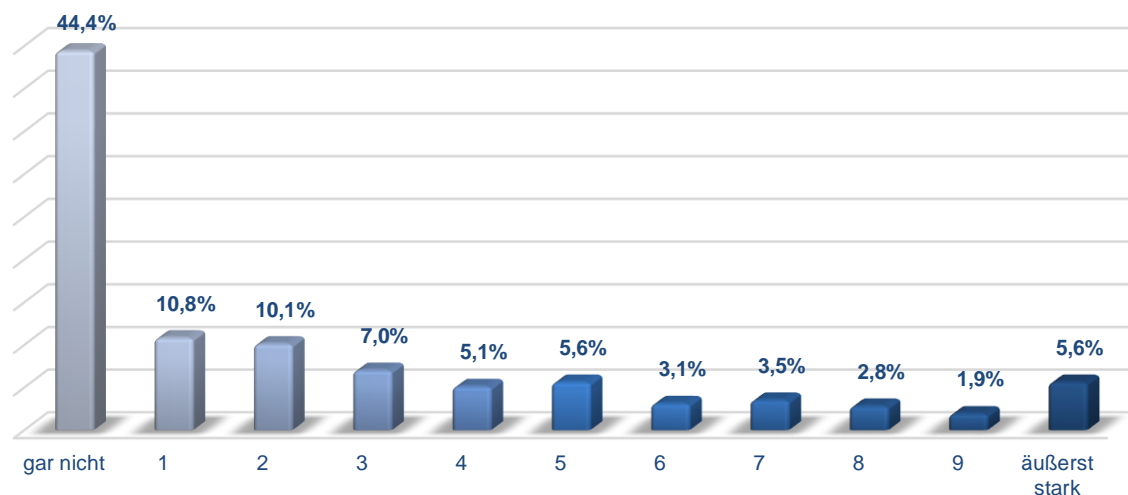

Mit über 44% ist der Anteil an Befragten, die sich überhaupt nicht dem Baustellenlärm exponiert fühlen mehr als dreimal höher als beim Flug- und Straßenverkehrslärm. Knapp zwei Drittel aller Probandin-

nen und Probanden empfinden sich in ihrem Wohnumfeld als gering dem Lärm von Baustellen ausgesetzt (gruppierte Antwortkategorien 0 [=gar nicht], 1 und 2), etwas mehr als 10% als stark ausgesetzt (*highly exposed*: gruppierte Antwortkategorien 8, 9 und 10 [=äußerst stark]).

Im Mittel liegen die Antworten der befragten Probandinnen und Probanden bei 2,4 (26,4%) und damit deutlich mehr als eine Antwortkategorie unter dem Niveau der Fragen nach dem Flugverkehrs- und dem Straßenverkehrslärm.

**Tabelle 102: Empfundene Baustellenlärmbelastung gruppiert**

|                        | Häufigkeit | Gültige Prozente | Kumulierte Prozente |
|------------------------|------------|------------------|---------------------|
| Gering exponiert       | 673        | 65,3             | 65,3                |
| Mittelgradig exponiert | 251        | 24,3             | 89,6                |
| Stark exponiert        | 107        | 10,4             | 100,0               |
| Gesamt                 | 1031       | 100,0            |                     |

### 5.1. Baustellenlärmbelastung und Katastralgemeinden

Die Befragten in Pradl geben gemittelt das größte Ausmaß an empfundener Baulärmbelastung an, die befragten Innsbruckerinnen und Innsbrucker in Vill das mit Abstand niedrigste:

**Abbildung 121: Empfundene Baustellenlärmbelastung und Katastralgemeinden im Mittelwertvergleich**

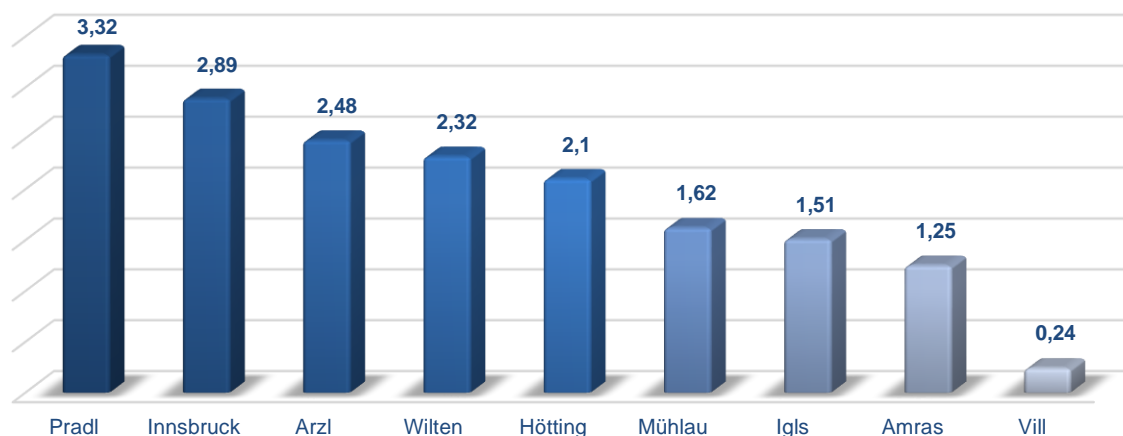

Anmerkung: Baustellenlärm ist stark auf Akutbelastungen bezogen und daher ist ein Vergleich der Katastralgemeinden zu einem sehr erheblichen Anteil nur eine Momentaufnahme.

### 5.2. Baustellenlärmbelastung und ausgewählte Parameter

Männer empfinden sich stärker baulärmbelastet als Frauen.

Mit zunehmendem Alter verringert sich das Ausmaß der empfundenen Ausgesetzttheit bei den Befragten.

Die Beziehungen zu anderen ausgewählten Parametern unterscheiden sich nur geringfügig von den Auswertungen zu den Ausgesetzttheitsempfindungen gegenüber Verkehrslärm:

**Tabelle 103: Empfundene Baustellenlärmexposition und ausgewählte Parameter (gruppiert)**

|                                                             |                           | Ausgesetzttheit Lärm von Baustellen gruppiert |            |                        |            |                 |            |
|-------------------------------------------------------------|---------------------------|-----------------------------------------------|------------|------------------------|------------|-----------------|------------|
|                                                             |                           | Gering exponiert                              |            | Mittelgradig exponiert |            | Stark exponiert |            |
|                                                             |                           | Anzahl                                        | Zeilen (%) | Anzahl                 | Zeilen (%) | Anzahl          | Zeilen (%) |
| <b>Geschlecht</b>                                           | weiblich                  | 331                                           | 61,2%      | 144                    | 26,6%      | 66              | 12,2%      |
|                                                             | männlich                  | 342                                           | 69,8%      | 107                    | 21,8%      | 41              | 8,4%       |
| <b>Altersgruppen</b>                                        | 18 bis 40 Jahre           | 276                                           | 62,7%      | 114                    | 25,9%      | 50              | 11,4%      |
|                                                             | 41 bis 60 Jahre           | 207                                           | 65,5%      | 77                     | 24,4%      | 32              | 10,1%      |
|                                                             | über 60 Jahre             | 190                                           | 69,1%      | 60                     | 21,8%      | 25              | 9,1%       |
| <b>Bildungsschicht</b>                                      | Primärer Schulabschluss   | 67                                            | 68,4%      | 24                     | 24,5%      | 7               | 7,1%       |
|                                                             | Sekundärer Schulabschluss | 349                                           | 64,4%      | 131                    | 24,2%      | 62              | 11,4%      |
|                                                             | Tertiärer Schulabschluss  | 255                                           | 65,7%      | 95                     | 24,5%      | 38              | 9,8%       |
| <b>Baulicher Schutz vor Verkehrslärm</b>                    | Keiner bis geringfügig    | 488                                           | 63,7%      | 189                    | 24,7%      | 89              | 11,6%      |
|                                                             | Gut bis komplett          | 163                                           | 69,1%      | 59                     | 25,0%      | 14              | 5,9%       |
| <b>Innenhof bzw. lärm-abgewandte Seite</b>                  | Ja                        | 453                                           | 64,6%      | 187                    | 26,7%      | 61              | 8,7%       |
|                                                             | Nein                      | 204                                           | 66,2%      | 60                     | 19,5%      | 44              | 14,3%      |
| <b>Nachtschlaf</b>                                          | Fenster geöffnet/gekippt  | 547                                           | 66,6%      | 192                    | 23,4%      | 82              | 10,0%      |
|                                                             | Fenster geschlossen       | 123                                           | 60,9%      | 56                     | 27,7%      | 23              | 11,4%      |
| <b>Lärmschutzfenster in den letzten 10 Jahren eingebaut</b> | Ja                        | 106                                           | 56,7%      | 54                     | 28,9%      | 27              | 14,4%      |
|                                                             | Nein                      | 456                                           | 67,9%      | 154                    | 22,9%      | 62              | 9,2%       |
|                                                             | weiß nicht/ k.A.          | 111                                           | 64,5%      | 43                     | 25,0%      | 18              | 10,5%      |
| <b>Lebensbedingungen (Summenscore)</b>                      | Nicht gut (*)             | 3                                             | 60,0%      | 1                      | 20,0%      | 1               | 20,0%      |
|                                                             | Durchschnittlich          | 419                                           | 62,5%      | 173                    | 25,8%      | 78              | 11,6%      |
|                                                             | Sehr gut                  | 251                                           | 70,5%      | 77                     | 21,6%      | 28              | 7,9%       |
| <b>Zufriedenheit</b>                                        | Nicht zufrieden           | 17                                            | 60,7%      | 6                      | 21,4%      | 5               | 17,9%      |
| <b>Wohnsituation</b>                                        | Durchschnittlich          | 139                                           | 53,9%      | 70                     | 27,1%      | 49              | 19,0%      |
| <b>insgesamt</b>                                            | Sehr zufrieden            | 516                                           | 69,4%      | 175                    | 23,5%      | 53              | 7,1%       |
| <b>Lebensqualität</b>                                       | Nicht gut (*)             | 4                                             | 40,0%      | 2                      | 20,0%      | 4               | 40,0%      |
|                                                             | Durchschnittlich          | 170                                           | 58,6%      | 83                     | 28,6%      | 37              | 12,8%      |
|                                                             | Sehr gut                  | 495                                           | 68,3%      | 165                    | 22,8%      | 65              | 9,0%       |
| <b>Lärmempfindlichkeit</b>                                  | Nicht lärmempfindlich     | 191                                           | 69,5%      | 61                     | 22,2%      | 23              | 8,4%       |
|                                                             | Durchschnittlich          | 383                                           | 65,6%      | 138                    | 23,6%      | 63              | 10,8%      |
|                                                             | Sehr lärmempfindlich      | 99                                            | 57,6%      | 52                     | 30,2%      | 21              | 12,2%      |
| <b>Gesundheitszustand</b>                                   | Gut                       | 501                                           | 66,4%      | 171                    | 22,7%      | 82              | 10,9%      |
|                                                             | Zufriedenstellend         | 122                                           | 65,6%      | 52                     | 28,0%      | 12              | 6,5%       |
|                                                             | Nicht gut                 | 48                                            | 53,9%      | 28                     | 31,5%      | 13              | 14,6%      |
| <b>Zunahme</b>                                              | Ja                        | 225                                           | 51,6%      | 132                    | 30,3%      | 79              | 18,1%      |
| <b>Lärmbelastung</b>                                        | Nein                      | 448                                           | 75,3%      | 119                    | 20,0%      | 28              | 4,7%       |
| <b>Abnahme</b>                                              | Ja                        | 42                                            | 72,4%      | 13                     | 22,4%      | 3 (*)           | 5,2%       |
| <b>Lärmbelastung</b>                                        | Nein                      | 631                                           | 64,9%      | 238                    | 24,5%      | 104             | 10,7%      |

|                                                             |                        |       |       |     |       |    |       |
|-------------------------------------------------------------|------------------------|-------|-------|-----|-------|----|-------|
| <b>Lautheit Innsbruck im Vergleich</b>                      | Ruhiger                | 197   | 67,5% | 65  | 22,3% | 30 | 10,3% |
|                                                             | Gleich                 | 362   | 65,7% | 140 | 25,4% | 49 | 8,9%  |
|                                                             | Lauter                 | 105   | 60,3% | 45  | 25,9% | 24 | 13,8% |
| <b>Notwendigkeit (weiterer) Maßnahmen zur Lärmreduktion</b> | Ja                     | 426   | 61,6% | 180 | 26,0% | 85 | 12,3% |
|                                                             | Nein                   | 134   | 69,8% | 42  | 21,9% | 16 | 8,3%  |
| <b>Belästigung Baulärm</b>                                  | Gering belästigt       | 613   | 91,5% | 52  | 7,8%  | 5  | 0,7%  |
|                                                             | Mittelgradig belästigt | 56    | 21,2% | 179 | 67,8% | 29 | 11,0% |
|                                                             | Stark belästigt        | 4 (*) | 4,2%  | 20  | 20,8% | 72 | 75,0% |

(\*) Zu geringe Fallzahlen für solide Auswertungen

## 6. Nachbarschaftslärmexposition

Sehr ähnlich der empfundenen Baustellenlärmexposition stellt sich das Expositionsempfinden beim Nachbarschaftslärm dar. Der Anteil an Personen, die sich in ihrem Wohnumfeld als stark exponiert ansehen, schrumpft auf knapp über 6% und fast 70% aller Befragten schätzen ihr Wohnumfeld als gering exponiert ein (gruppierte Antwortkategorien 0 [=gar nicht], 1 und 2):

**Abbildung 122: Empfundene Nachbarschaftslärmexposition in Prozent**

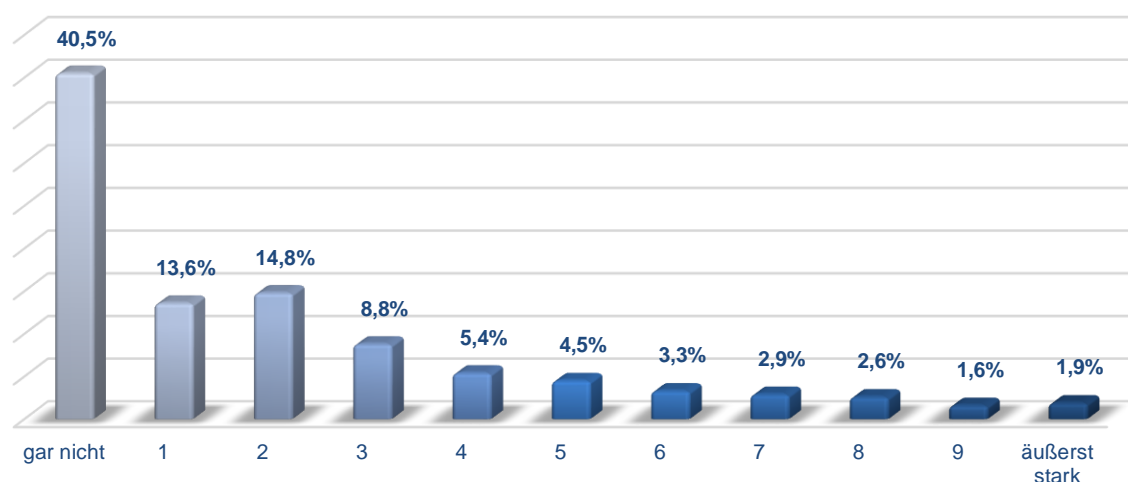

**Tabelle 104: Empfundene Nachbarschaftslärmexposition gruppiert**

|        | Häufigkeit             | Gültige Prozente | Kumulierte Prozente |
|--------|------------------------|------------------|---------------------|
| Gültig | Gering exponiert       | 711              | 69,0                |
|        | Mittelgradig exponiert | 257              | 93,9                |
|        | Stark exponiert        | 63               | 100,0               |
|        | Gesamt                 | 1031             | 100,0               |

Im Mittel liegen die Antworten der befragten Probandinnen und Probanden bei 2,08 (22,9%).

## 6.1. Nachbarschaftslärmexposition und Katastralgemeinden

In Wilten, Innsbruck und Pradl fühlen sich die Befragten am stärksten dem Nachbarschaftslärm ausgesetzt, in Igls, Vill und Mühlau am geringsten:

**Abbildung 123: Empfundene Nachbarschaftslärmexposition und Katastralgemeinden im Mittelwertvergleich**

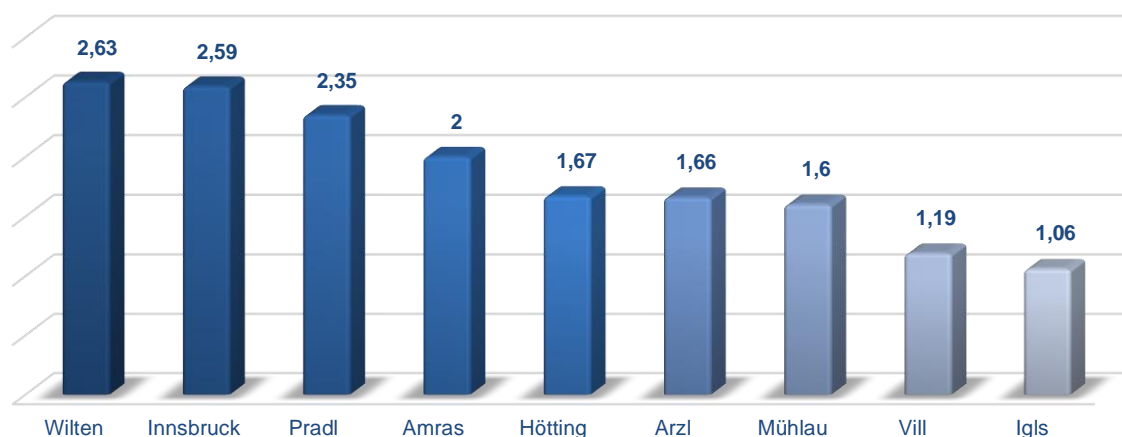

## 6.2. Nachbarschaftslärmexposition und ausgewählte Parameter

Die Gruppe der über 60-Jährigen empfindet sich weniger dem Nachbarschaftslärm ausgesetzt als die beiden jüngeren Altersgruppen. Ein ähnlich gelagerter Effekt bei den Pflichtschulabsolventinnen und – Absolventen verliert sich nach Altersadjustierung.

Die sich ergebenden Unterschiede zwischen einzelnen Gruppen in Bezug zu anderen ausgewählten Variablen sind vergleichsweise stark ausgeprägt und streuen stark:

**Tabelle 105: Empfundene Nachbarschaftslärmexposition und ausgewählte Parameter (gruppiert)**

|                                            |                           | Ausgesetzttheit Nachbarschaftslärm gruppiert |            |                        |            |                 |            |
|--------------------------------------------|---------------------------|----------------------------------------------|------------|------------------------|------------|-----------------|------------|
|                                            |                           | Gering exponiert                             |            | Mittelgradig exponiert |            | Stark exponiert |            |
|                                            |                           | Anzahl                                       | Zeilen (%) | Anzahl                 | Zeilen (%) | Anzahl          | Zeilen (%) |
| <b>Geschlecht</b>                          | weiblich                  | 368                                          | 68,0%      | 134                    | 24,8%      | 39              | 7,2%       |
|                                            | männlich                  | 343                                          | 70,0%      | 123                    | 25,1%      | 24              | 4,9%       |
| <b>Altersgruppen</b>                       | 18 bis 40 Jahre           | 290                                          | 65,9%      | 129                    | 29,3%      | 21              | 4,8%       |
|                                            | 41 bis 60 Jahre           | 207                                          | 65,5%      | 79                     | 25,0%      | 30              | 9,5%       |
|                                            | über 60 Jahre             | 214                                          | 77,8%      | 49                     | 17,8%      | 12              | 4,4%       |
| <b>Bildungsschicht</b>                     | Primärer Schulabschluss   | 72                                           | 73,5%      | 20                     | 20,4%      | 6               | 6,1%       |
|                                            | Sekundärer Schulabschluss | 373                                          | 68,8%      | 131                    | 24,2%      | 38              | 7,0%       |
|                                            | Tertiärer Schulabschluss  | 263                                          | 67,8%      | 106                    | 27,3%      | 19              | 4,9%       |
| <b>Baulicher Schutz vor Verkehrslärm</b>   | Keiner bis geringfügig    | 530                                          | 69,2%      | 187                    | 24,4%      | 49              | 6,4%       |
|                                            | Gut bis komplett          | 161                                          | 68,2%      | 63                     | 26,7%      | 12              | 5,1%       |
| <b>Innenhof bzw. lärm-abgewandte Seite</b> | Ja                        | 462                                          | 65,9%      | 191                    | 27,2%      | 48              | 6,8%       |
|                                            | Nein                      | 232                                          | 75,3%      | 63                     | 20,5%      | 13              | 4,2%       |

|                                                             |                          |       |       |       |       |       |       |
|-------------------------------------------------------------|--------------------------|-------|-------|-------|-------|-------|-------|
| <b>Nachtschlaf</b>                                          | Fenster geöffnet/gekippt | 580   | 70,6% | 198   | 24,1% | 43    | 5,2%  |
|                                                             | Fenster geschlossen      | 125   | 61,9% | 57    | 28,2% | 20    | 9,9%  |
| <b>Lärmschutzfenster in den letzten 10 Jahren eingebaut</b> | Ja                       | 114   | 61,0% | 52    | 27,8% | 21    | 11,2% |
|                                                             | Nein                     | 483   | 71,9% | 152   | 22,6% | 37    | 5,5%  |
|                                                             | weiß nicht/ k.A.         | 114   | 66,3% | 53    | 30,8% | 5     | 2,9%  |
| <b>Lebensbedingungen (Summenscore)</b>                      | Nicht gut (*)            | 3     | 60,0% | 0     | 0,0%  | 2     | 40,0% |
|                                                             | Durchschnittlich         | 425   | 63,4% | 194   | 29,0% | 51    | 7,6%  |
|                                                             | Sehr gut                 | 283   | 79,5% | 63    | 17,7% | 10    | 2,8%  |
| <b>Zufriedenheit</b>                                        | Nicht zufrieden          | 10    | 35,7% | 9     | 32,1% | 9     | 32,1% |
| <b>Wohnsituation</b>                                        | Durchschnittlich         | 147   | 57,0% | 82    | 31,8% | 29    | 11,2% |
| <b>insgesamt</b>                                            | Sehr zufrieden           | 553   | 74,3% | 166   | 22,3% | 25    | 3,4%  |
| <b>Lebensqualität</b>                                       | Nicht gut                | 7     | 70,0% | 0 (*) | 0,0%  | 3 (*) | 30,0% |
|                                                             | Durchschnittlich         | 174   | 60,0% | 82    | 28,3% | 34    | 11,7% |
|                                                             | Sehr gut                 | 526   | 72,6% | 174   | 24,0% | 25    | 3,4%  |
| <b>Lärmempfindlichkeit</b>                                  | Nicht lärmempfindlich    | 204   | 74,2% | 53    | 19,3% | 18    | 6,5%  |
|                                                             | Durchschnittlich         | 403   | 69,0% | 150   | 25,7% | 31    | 5,3%  |
|                                                             | Sehr lärmempfindlich     | 104   | 60,5% | 54    | 31,4% | 14    | 8,1%  |
| <b>Gesundheitszustand</b>                                   | Gut                      | 518   | 68,7% | 196   | 26,0% | 40    | 5,3%  |
|                                                             | Zufriedenstellend        | 130   | 69,9% | 44    | 23,7% | 12    | 6,5%  |
|                                                             | Nicht gut                | 61    | 68,5% | 17    | 19,1% | 11    | 12,4% |
| <b>Zunahme</b>                                              | Ja                       | 261   | 59,9% | 137   | 31,4% | 38    | 8,7%  |
| <b>Lärmbelastung</b>                                        | Nein                     | 450   | 75,6% | 120   | 20,2% | 25    | 4,2%  |
| <b>Abnahme</b>                                              | Ja                       | 43    | 74,1% | 13    | 22,4% | 2 (*) | 3,4%  |
| <b>Lärmbelastung</b>                                        | Nein                     | 668   | 68,7% | 244   | 25,1% | 61    | 6,3%  |
| <b>Lautheit Innsbruck im Vergleich</b>                      | Ruhiger                  | 200   | 68,5% | 75    | 25,7% | 17    | 5,8%  |
|                                                             | Gleich                   | 391   | 71,0% | 133   | 24,1% | 27    | 4,9%  |
|                                                             | Lauter                   | 108   | 62,1% | 47    | 27,0% | 19    | 10,9% |
| <b>Notwendigkeit (weiterer) Maßnahmen zur Lärmreduktion</b> | Ja                       | 450   | 65,1% | 188   | 27,2% | 53    | 7,7%  |
|                                                             | Nein                     | 149   | 77,6% | 37    | 19,3% | 6     | 3,1%  |
| <b>Belästigung Nachbarschaftslärm</b>                       | Gering belästigt         | 660   | 89,7% | 70    | 9,5%  | 6     | 0,8%  |
|                                                             | Mittelgradig belästigt   | 48    | 19,8% | 174   | 71,6% | 21    | 8,6%  |
|                                                             | Stark belästigt          | 3 (*) | 5,8%  | 13    | 25,0% | 36    | 69,2% |

(\*) Zu geringe Fallzahlen für solide Auswertungen

Die empfundene Ausgesetzttheit gegenüber Nachbarschaftslärm steht auch in Beziehung zur Einschätzung der Güte der Nachbarschaftsbeziehungen im eigenen Wohnumfeld (und umgekehrt):

**Abbildung 124: Empfundene Nachbarschaftslärmexposition und Güte der Nachbarschaftsbeziehungen im Mittelwertvergleich**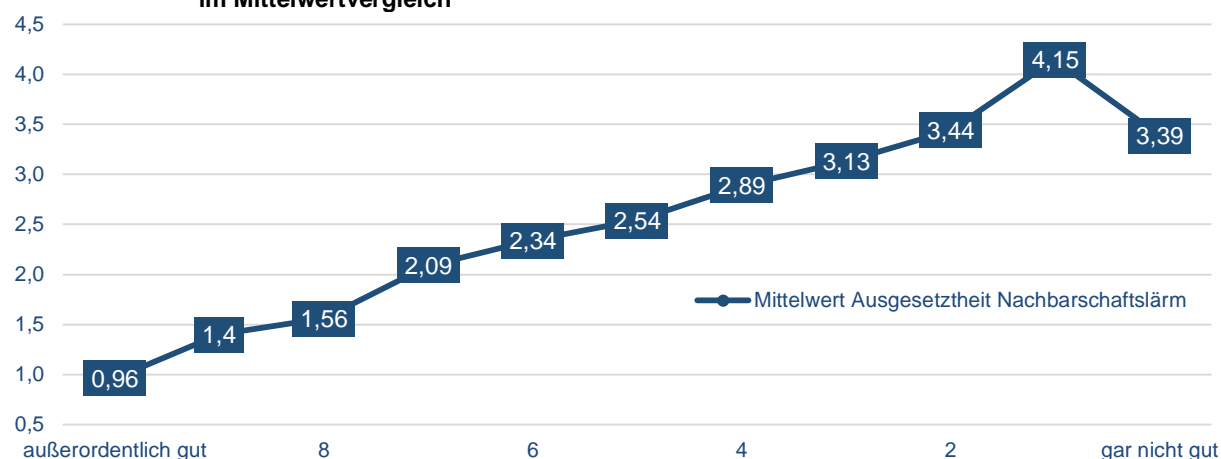

## 7. Lärmexposition durch Passanten und Gaststätten

Die Einschätzung der Ausgesetzttheit der eigenen Wohnung / des eigenen Wohnhauses gegenüber dem Lärm von Passanten und Gaststätten fällt in ihren Ausmaßen nahezu deckungsgleich mit den Einschätzungen des Nachbarschaftslärms aus, liegt jedoch noch einmal geringfügig darunter:

**Abbildung 125: Empfundene Lärmexposition durch Passanten und Gaststätten in Prozent**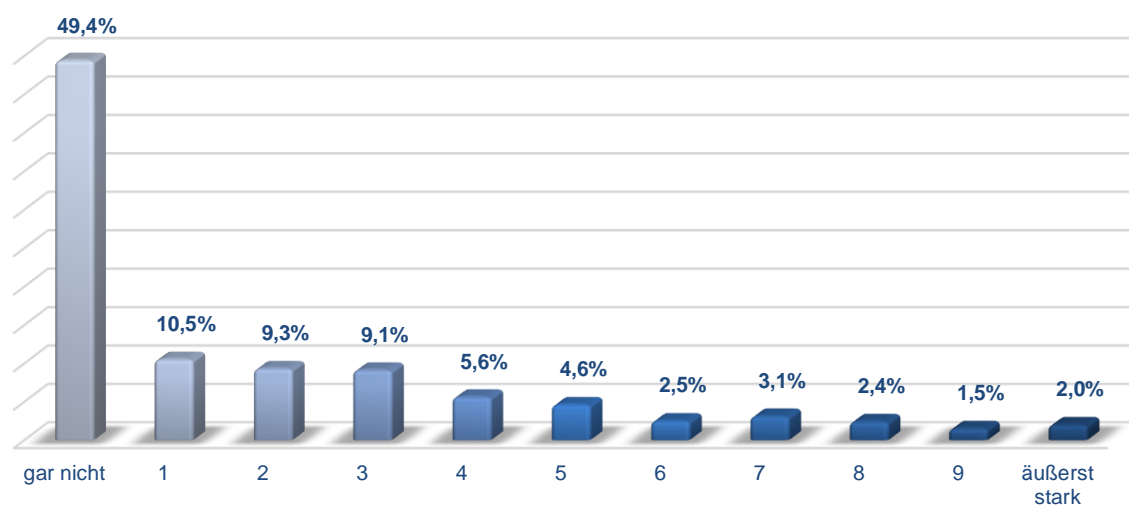**Tabelle 106: Empfundene Lärmexposition durch Passanten und Gaststätten gruppiert**

|                        | Häufigkeit | Gültige Prozente | Kumulierte Prozente |
|------------------------|------------|------------------|---------------------|
| Gering exponiert       | 713        | 69,2             | 69,2                |
| Mittelgradig exponiert | 257        | 24,9             | 94,1                |
| Stark exponiert        | 61         | 5,9              | 100,0               |
| Gesamt                 | 1031       | 100,0            |                     |



Wiederum sehen sich knapp 6% in ihrem Wohnumfeld als stark exponiert an (*highly exposed*: gruppierte Antwortkategorien 8, 9 und 10 [=äußerst stark]), der überwiegende Großteil der Befragten hingegen als nur gering ausgesetzt (über 70%).

Im Mittel liegen die Antworten der befragten Probandinnen und Probanden unterhalb der zweiten Antwortkategorie bei 1,91 (21,0%).

### 7.1. Lärmexposition Passanten / Gaststätten und Katastralgemeinden

Das Empfinden der eigenen Ausgesetzttheit gegenüber dem Lärm von Passanten und Gaststätten unterscheidet sich am deutlichsten aller Expositionsfragen zwischen den einzelnen Katastralgemeinden Innsbrucks und ist in direkter Abhängigkeit von der Anzahl der vorhandenen Lokale, Sehenswürdigkeiten etc. zu sehen, wodurch sich die inneren Stadtbezirke deutlich von den äußeren unterscheiden:

**Abbildung 126: Empfundene Lärmexposition durch Passanten und Gaststätten und Katastralgemeinden im Mittelwertvergleich**

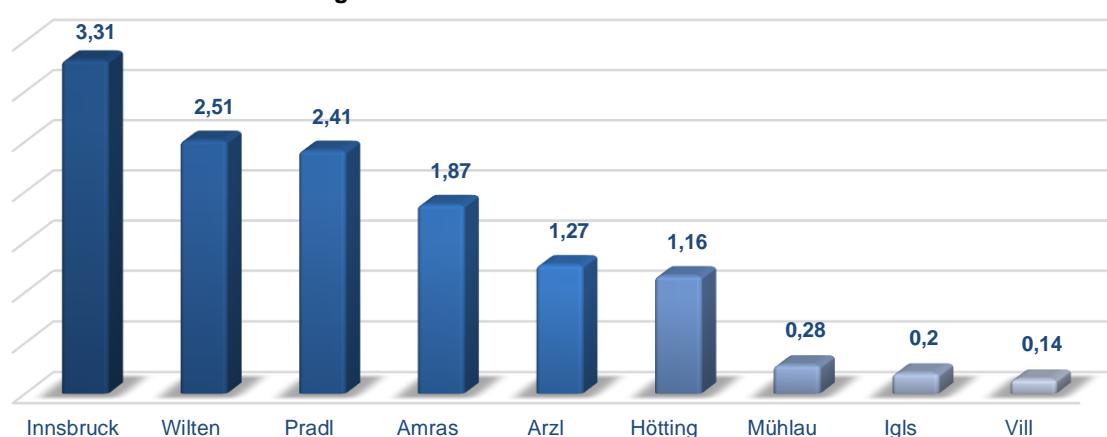

### 7.2. Lärmexposition Passanten / Gaststätten und einzelne Parameter

Die Ergebnisse der Zusammenschau mit ausgewählten anderen Variablen entsprechen weitestgehend den gemachten Auswertungen in Zusammenhang mit den anderen Lärmexpositionsfragen. Aufgrund der kleineren Fallzahlen der sich als stark vom Lärm verursacht von Passanten und Gaststätten exponiert empfindenden Befragten, kommt es in dieser Extremgruppe zu starken Streuungen:

**Tabelle 107: Empfundene Lärmexposition durch Passanten und Gaststätten und ausgewählte Parameter (gruppiert)**

|            |          | Ausgesetzttheit Lärm von Passanten u. Gaststätten gruppiert |            |                        |            |                 |            |
|------------|----------|-------------------------------------------------------------|------------|------------------------|------------|-----------------|------------|
|            |          | Gering exponiert                                            |            | Mittelgradig exponiert |            | Stark exponiert |            |
|            |          | Anzahl                                                      | Zeilen (%) | Anzahl                 | Zeilen (%) | Anzahl          | Zeilen (%) |
| Geschlecht | weiblich | 373                                                         | 68,9%      | 136                    | 25,1%      | 32              | 5,9%       |
|            | männlich | 340                                                         | 69,4%      | 121                    | 24,7%      | 29              | 5,9%       |

|                                                             |                           |       |       |       |       |       |       |
|-------------------------------------------------------------|---------------------------|-------|-------|-------|-------|-------|-------|
| <b>Altersgruppen</b>                                        | 18 bis 40 Jahre           | 296   | 67,3% | 114   | 25,9% | 30    | 6,8%  |
|                                                             | 41 bis 60 Jahre           | 211   | 66,8% | 82    | 25,9% | 23    | 7,3%  |
|                                                             | über 60 Jahre             | 206   | 74,9% | 61    | 22,2% | 8     | 2,9%  |
| <b>Bildungsschicht</b>                                      | Primärer Schulabschluss   | 62    | 63,3% | 32    | 32,7% | 4 (*) | 4,1%  |
|                                                             | Sekundärer Schulabschluss | 378   | 69,7% | 130   | 24,0% | 34    | 6,3%  |
|                                                             | Tertiärer Schulabschluss  | 271   | 69,8% | 94    | 24,2% | 23    | 5,9%  |
| <b>Baulicher Schutz vor Verkehrslärm</b>                    | Keiner bis geringfügig    | 514   | 67,1% | 199   | 26,0% | 53    | 6,9%  |
|                                                             | Gut bis komplett          | 178   | 75,4% | 51    | 21,6% | 7     | 3,0%  |
| <b>Innenhof bzw. lärm-abgewandte Seite</b>                  | Ja                        | 465   | 66,3% | 198   | 28,2% | 38    | 5,4%  |
|                                                             | Nein                      | 234   | 76,0% | 51    | 16,6% | 23    | 7,5%  |
| <b>Nachtschlaf</b>                                          | Fenster geöffnet/gekippt  | 594   | 72,4% | 191   | 23,3% | 36    | 4,4%  |
|                                                             | Fenster geschlossen       | 114   | 56,4% | 64    | 31,7% | 24    | 11,9% |
| <b>Lärmschutzfenster in den letzten 10 Jahren eingebaut</b> | Ja                        | 122   | 65,2% | 49    | 26,2% | 16    | 8,6%  |
|                                                             | Nein                      | 475   | 70,7% | 159   | 23,7% | 38    | 5,7%  |
|                                                             | weiß nicht/ k.A.          | 116   | 67,4% | 49    | 28,5% | 7     | 4,1%  |
| <b>Lebensbedingungen (Summenscore)</b>                      | Nicht gut (*)             | 2     | 40,0% | 2     | 40,0% | 1     | 20,0% |
|                                                             | Durchschnittlich          | 430   | 64,2% | 196   | 29,3% | 44    | 6,6%  |
|                                                             | Sehr gut                  | 281   | 78,9% | 59    | 16,6% | 16    | 4,5%  |
| <b>Zufriedenheit</b>                                        | Nicht zufrieden           | 15    | 53,6% | 8     | 28,6% | 5     | 17,9% |
| <b>Wohnsituation</b>                                        | Durchschnittlich          | 145   | 56,2% | 88    | 34,1% | 25    | 9,7%  |
| <b>insgesamt</b>                                            | Sehr zufrieden            | 552   | 74,2% | 161   | 21,6% | 31    | 4,2%  |
| <b>Lebensqualität</b>                                       | Nicht gut                 | 6     | 60,0% | 1 (*) | 10,0% | 3 (*) | 30,0% |
|                                                             | Durchschnittlich          | 175   | 60,3% | 97    | 33,4% | 18    | 6,2%  |
|                                                             | Sehr gut                  | 527   | 72,7% | 158   | 21,8% | 40    | 5,5%  |
| <b>Zunahme</b>                                              | Ja                        | 264   | 60,6% | 136   | 31,2% | 36    | 8,3%  |
| <b>Lärmbelastung</b>                                        | Nein                      | 449   | 75,5% | 121   | 20,3% | 25    | 4,2%  |
| <b>Abnahme</b>                                              | Ja                        | 43    | 74,1% | 13    | 22,4% | 2 (*) | 3,4%  |
| <b>Lärmbelastung</b>                                        | Nein                      | 670   | 68,9% | 244   | 25,1% | 59    | 6,1%  |
| <b>Lautheit Innsbruck im Vergleich</b>                      | Ruhiger                   | 214   | 73,3% | 68    | 23,3% | 10    | 3,4%  |
|                                                             | Gleich                    | 392   | 71,1% | 123   | 22,3% | 36    | 6,5%  |
|                                                             | Lauter                    | 96    | 55,2% | 63    | 36,2% | 15    | 8,6%  |
| <b>Notwendigkeit (weiterer) Maßnahmen zur Lärmreduktion</b> | Ja                        | 462   | 66,9% | 175   | 25,3% | 54    | 7,8%  |
|                                                             | Nein                      | 144   | 75,0% | 44    | 22,9% | 4 (*) | 2,1%  |
| <b>Belästigung</b>                                          | Gering belästigt          | 667   | 89,2% | 76    | 10,2% | 5     | 0,7%  |
| <b>Lärm durch Passanten und Gaststätten</b>                 | Mittelgradig belästigt    | 45    | 19,3% | 171   | 73,4% | 17    | 7,3%  |
|                                                             | Stark belästigt           | 1 (*) | 2,0%  | 10    | 20,0% | 39    | 78,0% |

(\*) Zu geringe Fallzahlen für solide Auswertungen

## 8. Exposition gegenüber Erschütterungen

Das Empfinden einer verstärkten Erschütterungsexposition beginnt bereits bei der Fühlbarkeitsschwelle und zieht im Regelfall sehr starke Belästigungsreaktionen nach sich (siehe dazu auch das folgende Kapitel *Belästigung / Störung durch Lärm*). Neben der direkten Übertragung von Erschütterungen sind auch Erschütterungen verursacht von sekundärem Luftschall zu berücksichtigen.

Knapp 80% aller befragten Innsbruckerinnen und Innsbrucker sehen ihr Wohnumfeld als nur gering erschütterungsexponiert an, 4,1% als Erschütterungen stark ausgesetzt:

**Abbildung 127: Empfundene Exposition gegenüber Erschütterungen in Prozent**

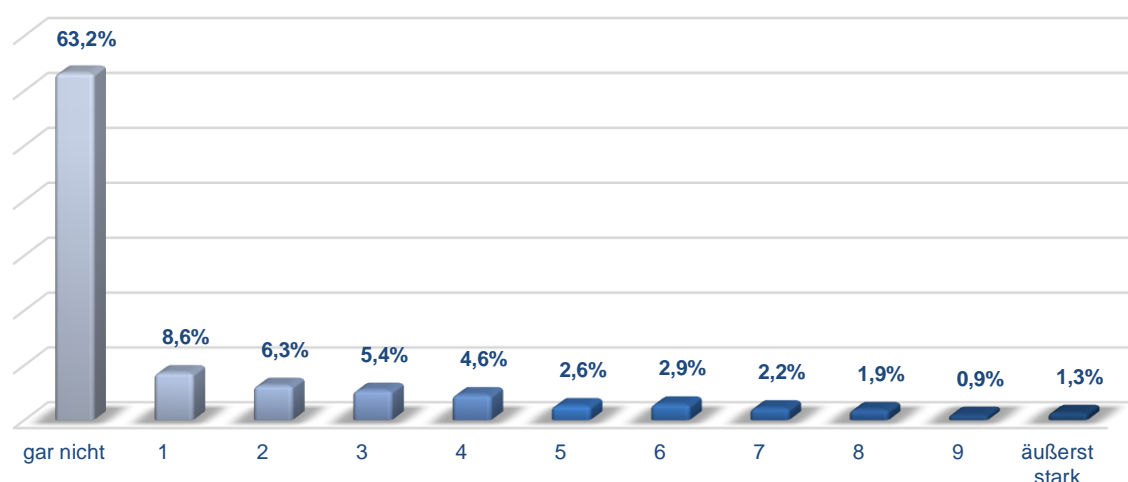

Im Mittel liegen die Antworten der befragten Probandinnen und Probanden bei 1,38 (15,2%) und damit kommt der Mittelwert innerhalb der ersten Antwortkategorie *gar nicht ausgesetzt* zu liegen.

**Tabelle 108: Empfundene Exposition gegenüber Erschütterungen gruppiert**

|                        | Häufigkeit | Gültige Prozente | Kumulierte Prozente |
|------------------------|------------|------------------|---------------------|
| Gering exponiert       | 806        | 78,2             | 78,2                |
| Mittelgradig exponiert | 183        | 17,7             | 95,9                |
| Stark exponiert        | 42         | 4,1              | 100,0               |
| Gesamt                 | 1031       | 100,0            |                     |

### 8.1. Erschütterungsexposition und Katastralgemeinden

Das größte Ausmaß an Erschütterungsexposition wird in Wilten und Innsbruck empfunden, das geringste in Vill und Mühlau:

**Abbildung 128: Empfundene Erschütterungsexposition und Katastralgemeinden im Mittelwertvergleich**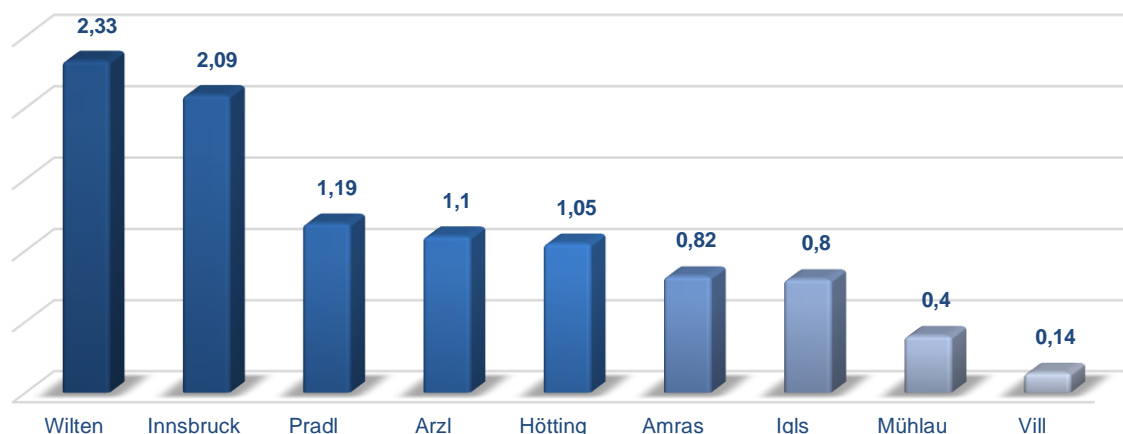

## 8.2. Erschütterungsexposition und ausgewählte Parameter

Auch bei der empfundenen Erschütterungsexposition kommt es in der Zusammenschau mit anderen ausgewählten Variablen zu keinen größeren Abweichungen im Vergleich zu den gemachten Auswertungen in Verbindung mit den Lärmexpositionsfragen. Die Gruppe der sich stark Erschütterungen ausgesetzt empfindenden Befragten umfasst nur einen sehr begrenzten Umfang (N=42). Aus diesem Grund sind einige der Querauswertungen in Bezug zu dieser Extremgruppe aufgrund kleiner Fallzahlen nur bedingt zu interpretieren:

**Tabelle 109: Empfundene Erschütterungsexposition und ausgewählte Parameter (gruppiert)**

|                                                   |                           | Ausgesetzttheit Erschütterungen gesamt gruppiert |            |                        |            |                 |            |
|---------------------------------------------------|---------------------------|--------------------------------------------------|------------|------------------------|------------|-----------------|------------|
|                                                   |                           | Gering exponiert                                 |            | Mittelgradig exponiert |            | Stark exponiert |            |
|                                                   |                           | Anzahl                                           | Zeilen (%) | Anzahl                 | Zeilen (%) | Anzahl          | Zeilen (%) |
| <b>Geschlecht</b>                                 | weiblich                  | 408                                              | 75,4%      | 104                    | 19,2%      | 29              | 5,4%       |
|                                                   | männlich                  | 398                                              | 81,2%      | 79                     | 16,1%      | 13              | 2,7%       |
| <b>Altersgruppen</b>                              | 18 bis 40 Jahre           | 339                                              | 77,0%      | 86                     | 19,5%      | 15              | 3,4%       |
|                                                   | 41 bis 60 Jahre           | 237                                              | 75,0%      | 61                     | 19,3%      | 18              | 5,7%       |
|                                                   | über 60 Jahre             | 230                                              | 83,6%      | 36                     | 13,1%      | 9               | 3,3%       |
| <b>Bildungsschicht</b>                            | Primärer Schulabschluss   | 84                                               | 85,7%      | 9                      | 9,2%       | 5               | 5,1%       |
|                                                   | Sekundärer Schulabschluss | 419                                              | 77,3%      | 100                    | 18,5%      | 23              | 4,2%       |
|                                                   | Tertiärer Schulabschluss  | 300                                              | 77,3%      | 74                     | 19,1%      | 14              | 3,6%       |
| <b>Baulicher Schutz vor Verkehrslärm</b>          | Keiner bis geringfügig    | 584                                              | 76,2%      | 144                    | 18,8%      | 38              | 5,0%       |
|                                                   | Gut bis komplett          | 197                                              | 83,5%      | 35                     | 14,8%      | 4               | 1,7%       |
| <b>Innenhof bzw. lärm-abgewandte Seite</b>        | Ja                        | 552                                              | 78,7%      | 123                    | 17,5%      | 26              | 3,7%       |
|                                                   | Nein                      | 237                                              | 76,9%      | 55                     | 17,9%      | 16              | 5,2%       |
| <b>Nachtschlaf</b>                                | Fenster geöffnet/gekippt  | 659                                              | 80,3%      | 140                    | 17,1%      | 22              | 2,7%       |
|                                                   | Fenster geschlossen       | 141                                              | 69,8%      | 42                     | 20,8%      | 19              | 9,4%       |
| <b>Lärmschutzfenster in den letzten 10 Jahren</b> | Ja                        | 131                                              | 70,1%      | 41                     | 21,9%      | 15              | 8,0%       |
|                                                   | Nein                      | 535                                              | 79,6%      | 117                    | 17,4%      | 20              | 3,0%       |

|                                                                     |                        |     |       |     |       |    |       |
|---------------------------------------------------------------------|------------------------|-----|-------|-----|-------|----|-------|
| <b>eingebaut</b>                                                    | weiß nicht/ k.A.       | 140 | 81,4% | 25  | 14,5% | 7  | 4,1%  |
| <b>Lebensbedingungen<br/>(Summenscore)</b>                          | Nicht gut              | 3   | 60,0% | 2   | 40,0% | 0  | 0,0%  |
|                                                                     | Durchschnittlich       | 499 | 74,5% | 140 | 20,9% | 31 | 4,6%  |
|                                                                     | Sehr gut               | 304 | 85,4% | 41  | 11,5% | 11 | 3,1%  |
| <b>Zufriedenheit</b>                                                | Nicht zufrieden        | 14  | 50,0% | 8   | 28,6% | 6  | 21,4% |
| <b>Wohnsituation</b>                                                | Durchschnittlich       | 176 | 68,2% | 63  | 24,4% | 19 | 7,4%  |
| <b>insgesamt</b>                                                    | Sehr zufrieden         | 616 | 82,8% | 111 | 14,9% | 17 | 2,3%  |
| <b>Lebensqualität</b>                                               | Nicht gut              | 4   | 40,0% | 4   | 40,0% | 2  | 20,0% |
|                                                                     | Durchschnittlich       | 204 | 70,3% | 70  | 24,1% | 16 | 5,5%  |
|                                                                     | Sehr gut               | 593 | 81,8% | 108 | 14,9% | 24 | 3,3%  |
| <b>Lärmempfindlichkeit</b>                                          | Nicht lärmempfindlich  | 233 | 84,7% | 32  | 11,6% | 10 | 3,6%  |
|                                                                     | Durchschnittlich       | 446 | 76,4% | 114 | 19,5% | 24 | 4,1%  |
|                                                                     | Sehr lärmempfindlich   | 127 | 73,8% | 37  | 21,5% | 8  | 4,7%  |
| <b>Gesundheitszustand</b>                                           | Gut                    | 595 | 78,9% | 134 | 17,8% | 25 | 3,3%  |
|                                                                     | Zufriedenstellend      | 148 | 79,6% | 30  | 16,1% | 8  | 4,3%  |
|                                                                     | Nicht gut              | 61  | 68,5% | 19  | 21,3% | 9  | 10,1% |
| <b>Zunahme</b>                                                      | Ja                     | 310 | 71,1% | 99  | 22,7% | 27 | 6,2%  |
| <b>Lärmbelastung</b>                                                | Nein                   | 496 | 83,4% | 84  | 14,1% | 15 | 2,5%  |
| <b>Abnahme</b>                                                      | Ja                     | 51  | 87,9% | 6   | 10,3% | 1  | 1,7%  |
| <b>Lärmbelastung</b>                                                | Nein                   | 755 | 77,6% | 177 | 18,2% | 41 | 4,2%  |
| <b>Lautheit Innsbruck im<br/>Vergleich</b>                          | Ruhiger                | 244 | 83,6% | 41  | 14,0% | 7  | 2,4%  |
|                                                                     | Gleich                 | 429 | 77,9% | 95  | 17,2% | 27 | 4,9%  |
|                                                                     | Lauter                 | 119 | 68,4% | 47  | 27,0% | 8  | 4,6%  |
| <b>Notwendigkeit (weiterer)<br/>Maßnahmen zur<br/>Lärmreduktion</b> | Ja                     | 508 | 73,5% | 145 | 21,0% | 38 | 5,5%  |
|                                                                     | Nein                   | 164 | 85,4% | 25  | 13,0% | 3  | 1,6%  |
| <b>Belästigung<br/>Erschütterungen</b>                              | Gering belästigt       | 789 | 91,5% | 69  | 8,0%  | 4  | 0,5%  |
|                                                                     | Mittelgradig belästigt | 15  | 11,1% | 104 | 77,0% | 16 | 11,9% |
|                                                                     | Stark belästigt        | 2   | 5,9%  | 10  | 29,4% | 22 | 64,7% |

Anm.: In mehreren Subgruppen sind die Fallzahlen für solide Auswertungen zu gering

## 9. Schienenverkehrslärmexposition

70% aller Befragten empfinden sich in ihrem Wohnumfeld als überhaupt nicht dem Schienenverkehrslärm ausgesetzt. 82% sehen sich gruppiert als in ihrem Wohnumfeld gering dem Lärm ausgehend von der Eisenbahn ausgesetzt (gruppierte Antwortkategorien 0 [=gar nicht], 1 und 2), 2,8% als stark ausgesetzt (*highly exposed*: gruppierte Antwortkategorien 8, 9 und 10 [=äußerst stark]):

**Abbildung 129: Empfundene Schienenverkehrslärmexposition in Prozent**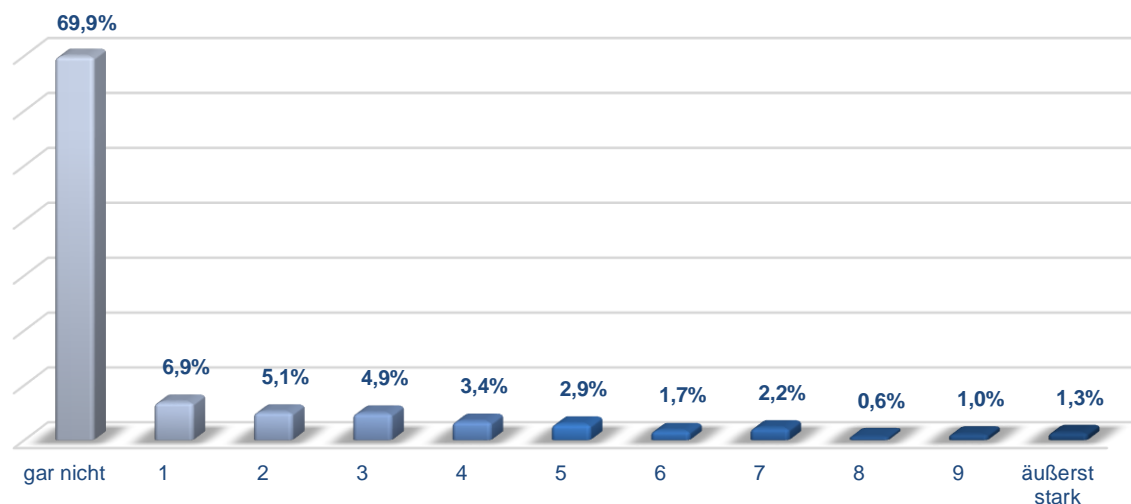

Im Mittel liegen die Antworten der befragten Probandinnen und Probanden bei 1,12 (12,3%).

**Tabelle 110: Empfundene Schienenverkehrslärmexposition gruppiert**

|                        | Häufigkeit | Gültige Prozente | Kumulierte Prozente |
|------------------------|------------|------------------|---------------------|
| Gering exponiert       | 845        | 82,0             | 82,0                |
| Mittelgradig exponiert | 157        | 15,2             | 97,2                |
| Stark exponiert        | 29         | 2,8              | 100,0               |
| Gesamt                 | 1031       | 100,0            |                     |

### 9.1. Schienenlärmexposition und Schienenlärmbelastung

In der Zusammenschau zwischen dem Empfinden der Ausgesetzttheit im eigenen Wohnumfeld und der gegebenen Schienenlärmbelastung zeigt sich bis zu 24h-Lärmpegeln von über 50dB nur eine sehr eingeschränkte Steigerung des Gefühls der eigenen Exposition:

**Abbildung 130: Empfundene Schienenverkehrslärmexposition und 24h-Schienenverkehrslärmbelastung  $L_{den}$  in 10dB-Schritten im Mittelwertvergleich**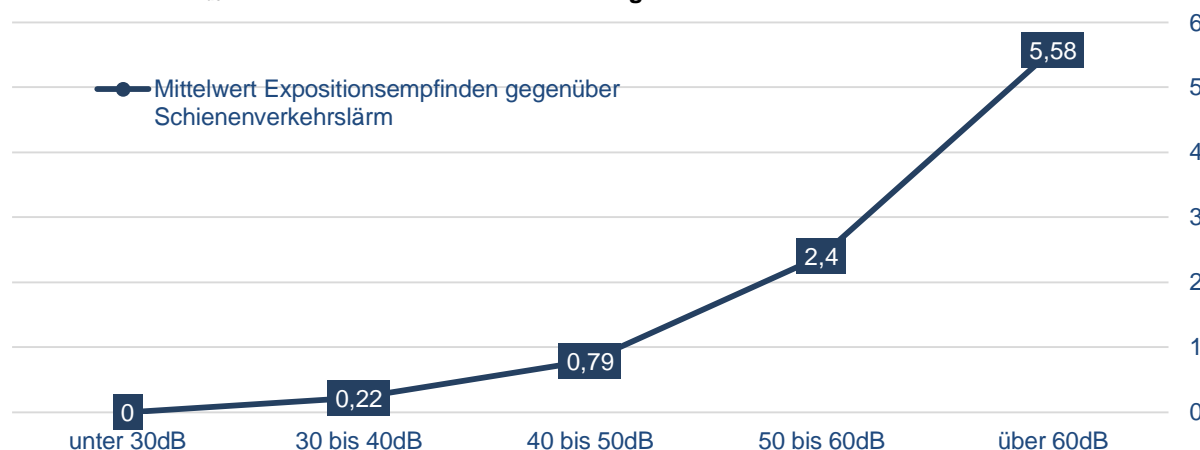

Im Nachtzeitraum liegt dieser „Schwellenwert“ niedriger. Das eigene Expositionsempfinden gegenüber Schienenverkehrslärm steigt jedoch ab diesen Werten sehr stark an.

Im Vergleich zum Flugverkehrslärm und etwas eingeschränkter auch zum Straßenverkehrslärm ist von einer größeren Toleranz von Dauerschallpegeln unter 50dB ausgehend vom Schienenverkehr auszugehen, bis Befragte für sich selbst eine mittelgradige oder darüber hinausgehende Lärmexposition aus dem Schienenverkehr annehmen:

**Abbildung 131: Empfundene Schienenverkehrslärmexposition und nächtliche Schienenverkehrslärmbelastung  $L_n$  in 10dB-Schritten im Mittelwertvergleich**

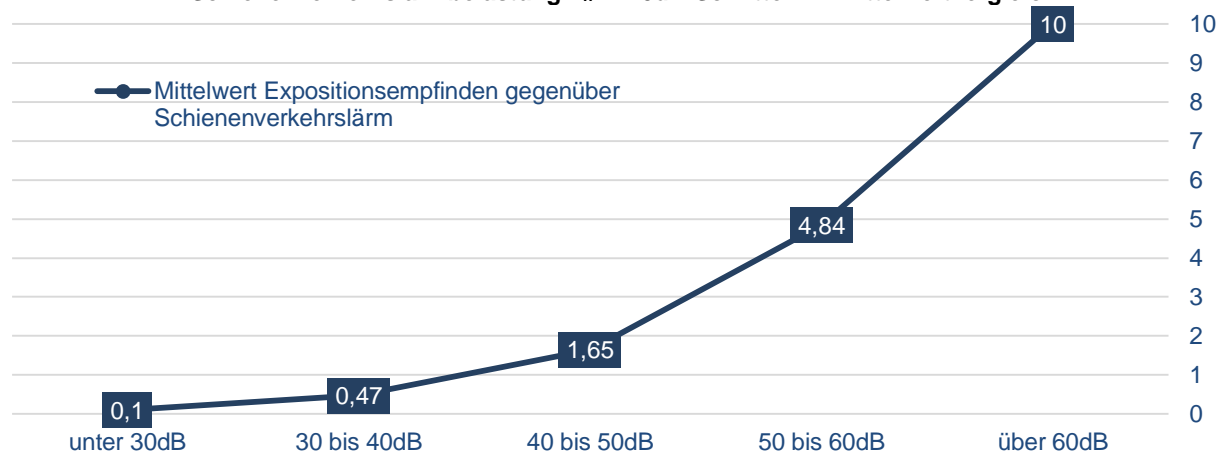

Anm.: Bei den mit über 60dB im Nachtzeitraum stark belasteten Befragten handelt es sich um 4 Personen, weshalb die Aussagekraft der statistischen Auswertung für dieses Datum stark eingeschränkt ist.

## 9.2. Schienenlärmexposition und Katastralgemeinden

Entsprechend der gegebenen Schienenverkehrslärmbelastung zeigt sich das mit Abstand stärkste Schienenlärmexpositionsempfinden in Wilten. Die geringste Ausgesetzttheit gegenüber Schienenlärm im eigenen Wohnumfeld empfinden die Befragten in Igls, Vill und Amras:

**Abbildung 132: Empfundene Schienenverkehrslärmexposition und Katastralgemeinden im Mittelwertvergleich**

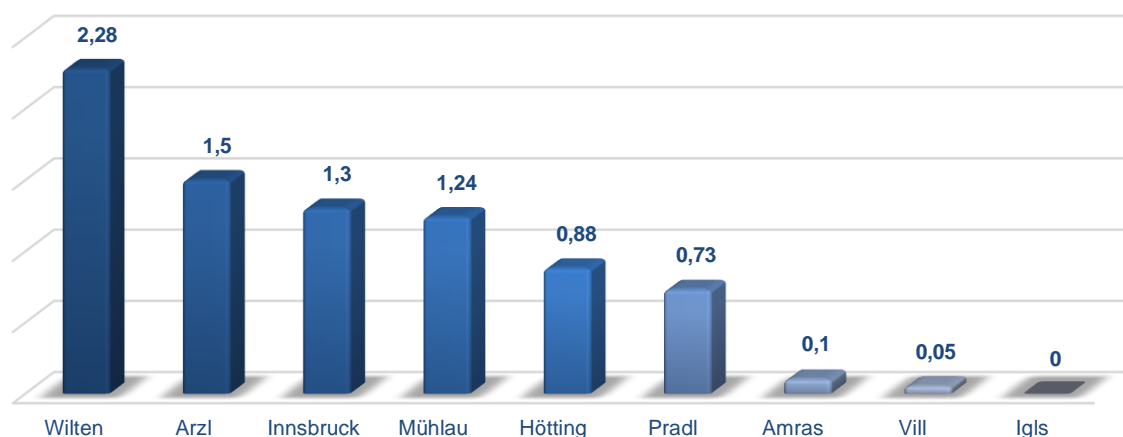

### 9.3. Schienenlärmexposition und ausgewählte Parameter

Die Auswertungen der empfundenen Schienenverkehrslärmexposition in Zusammenschau mit anderen Variablen entsprechen weitestgehend den Analysen der anderen Lärmexpositionsquellen in den vorangegangenen Subkapiteln.

Die Gruppe der sich stark schienenverkehrslärmexponiert empfindenden Befragten umfasst nur einen sehr begrenzten Umfang (N=29). Aus diesem Grund sind einige der Querauswertungen in Bezug zu dieser Extremgruppe aufgrund kleiner Fallzahlen nur bedingt zu interpretieren:

**Tabelle 111: Empfundene Schienenlärmexposition und ausgewählte Parameter (gruppiert)**

|                                                             |                           | Ausgesetztheit Schienenverkehrslärm gruppiert |            |                        |            |                 |            |
|-------------------------------------------------------------|---------------------------|-----------------------------------------------|------------|------------------------|------------|-----------------|------------|
|                                                             |                           | Gering exponiert                              |            | Mittelgradig exponiert |            | Stark exponiert |            |
|                                                             |                           | Anzahl                                        | Zeilen (%) | Anzahl                 | Zeilen (%) | Anzahl          | Zeilen (%) |
| <b>Geschlecht</b>                                           | weiblich                  | 442                                           | 81,7%      | 84                     | 15,5%      | 15              | 2,8%       |
|                                                             | männlich                  | 403                                           | 82,2%      | 73                     | 14,9%      | 14              | 2,9%       |
| <b>Altersgruppen</b>                                        | 18 bis 40 Jahre           | 359                                           | 81,6%      | 65                     | 14,8%      | 16              | 3,6%       |
|                                                             | 41 bis 60 Jahre           | 254                                           | 80,4%      | 51                     | 16,1%      | 11              | 3,5%       |
|                                                             | über 60 Jahre             | 232                                           | 84,4%      | 41                     | 14,9%      | 2               | 0,7%       |
| <b>Bildungsschicht</b>                                      | Primärer Schulabschluss   | 88                                            | 89,8%      | 7                      | 7,1%       | 3               | 3,1%       |
|                                                             | Sekundärer Schulabschluss | 441                                           | 81,4%      | 92                     | 17,0%      | 9               | 1,7%       |
|                                                             | Tertiärer Schulabschluss  | 313                                           | 80,7%      | 58                     | 14,9%      | 17              | 4,4%       |
| <b>Baulicher Schutz vor Verkehrslärm</b>                    | Keiner bis geringfügig    | 620                                           | 80,9%      | 124                    | 16,2%      | 22              | 2,9%       |
|                                                             | Gut bis komplett          | 202                                           | 85,6%      | 27                     | 11,4%      | 7               | 3,0%       |
| <b>Innenhof bzw. lärm-abgewandte Seite</b>                  | Ja                        | 590                                           | 84,2%      | 93                     | 13,3%      | 18              | 2,6%       |
|                                                             | Nein                      | 239                                           | 77,6%      | 58                     | 18,8%      | 11              | 3,6%       |
| <b>Nachtschlaf</b>                                          | Fenster geöffnet/gekippt  | 676                                           | 82,3%      | 124                    | 15,1%      | 21              | 2,6%       |
|                                                             | Fenster geschlossen       | 161                                           | 79,7%      | 33                     | 16,3%      | 8               | 4,0%       |
| <b>Lärmschutzfenster in den letzten 10 Jahren eingebaut</b> | Ja                        | 144                                           | 77,0%      | 37                     | 19,8%      | 6               | 3,2%       |
|                                                             | Nein                      | 556                                           | 82,7%      | 100                    | 14,9%      | 16              | 2,4%       |
|                                                             | weiß nicht/ k.A.          | 145                                           | 84,3%      | 20                     | 11,6%      | 7               | 4,1%       |
| <b>Lebensbedingungen (Summenscore)</b>                      | Nicht gut                 | 2                                             | 40,0%      | 3                      | 60,0%      | 0               | 0,0%       |
|                                                             | Durchschnittlich          | 537                                           | 80,1%      | 108                    | 16,1%      | 25              | 3,7%       |
|                                                             | Sehr gut                  | 306                                           | 86,0%      | 46                     | 12,9%      | 4               | 1,1%       |
| <b>Zufriedenheit</b>                                        | Nicht zufrieden           | 19                                            | 67,9%      | 7                      | 25,0%      | 2               | 7,1%       |
| <b>Wohnsituation insgesamt</b>                              | Durchschnittlich          | 204                                           | 79,1%      | 43                     | 16,7%      | 11              | 4,3%       |
|                                                             | Sehr zufrieden            | 621                                           | 83,5%      | 107                    | 14,4%      | 16              | 2,2%       |
| <b>Lärmempfindlichkeit</b>                                  | Nicht lärmempfindlich     | 234                                           | 85,1%      | 32                     | 11,6%      | 9               | 3,3%       |
|                                                             | Durchschnittlich          | 475                                           | 81,3%      | 93                     | 15,9%      | 16              | 2,7%       |
|                                                             | Sehr lärmempfindlich      | 136                                           | 79,1%      | 32                     | 18,6%      | 4               | 2,3%       |
| <b>Zunahme Lärmbelastung</b>                                | Ja                        | 351                                           | 80,5%      | 72                     | 16,5%      | 13              | 3,0%       |
| <b>Abnahme Lärmbelastung</b>                                | Nein                      | 494                                           | 83,0%      | 85                     | 14,3%      | 16              | 2,7%       |
|                                                             | Ja                        | 49                                            | 84,5%      | 7                      | 12,1%      | 2               | 3,4%       |
| <b>Lautheit Innsbruck im</b>                                | Nein                      | 796                                           | 81,8%      | 150                    | 15,4%      | 27              | 2,8%       |
|                                                             | Ruhiger                   | 242                                           | 82,9%      | 46                     | 15,8%      | 4               | 1,4%       |



|                                                             |                        |     |       |     |       |    |       |
|-------------------------------------------------------------|------------------------|-----|-------|-----|-------|----|-------|
| <b>Vergleich</b>                                            | Gleich                 | 457 | 82,9% | 78  | 14,2% | 16 | 2,9%  |
|                                                             | Lauter                 | 132 | 75,9% | 33  | 19,0% | 9  | 5,2%  |
| <b>Notwendigkeit (weiterer) Maßnahmen zur Lärmreduktion</b> | Ja                     | 548 | 79,3% | 119 | 17,2% | 24 | 3,5%  |
|                                                             | Nein                   | 166 | 86,5% | 25  | 13,0% | 1  | 0,5%  |
| <b>Belästigung Schienenverkehrslärm</b>                     | Gering belästigt       | 782 | 93,1% | 54  | 6,4%  | 4  | 0,5%  |
|                                                             | Mittelgradig belästigt | 54  | 33,5% | 97  | 60,2% | 10 | 6,2%  |
|                                                             | Stark belästigt        | 9   | 30,0% | 6   | 20,0% | 15 | 50,0% |

Anm.: In mehreren Subgruppen sind die Fallzahlen für solide Auswertungen zu gering

## 10. Autobahnlärmexposition

Etwas weniger als 2% aller befragten Innsbruckerinnen und Innsbrucker sehen sich in ihrem Wohnumfeld dem Autobahnlärm stark exponiert, über 90% nur gering, davon knapp 80% gar nicht ausgesetzt:

**Abbildung 133: Empfundene Autobahnlärmexposition in Prozent**

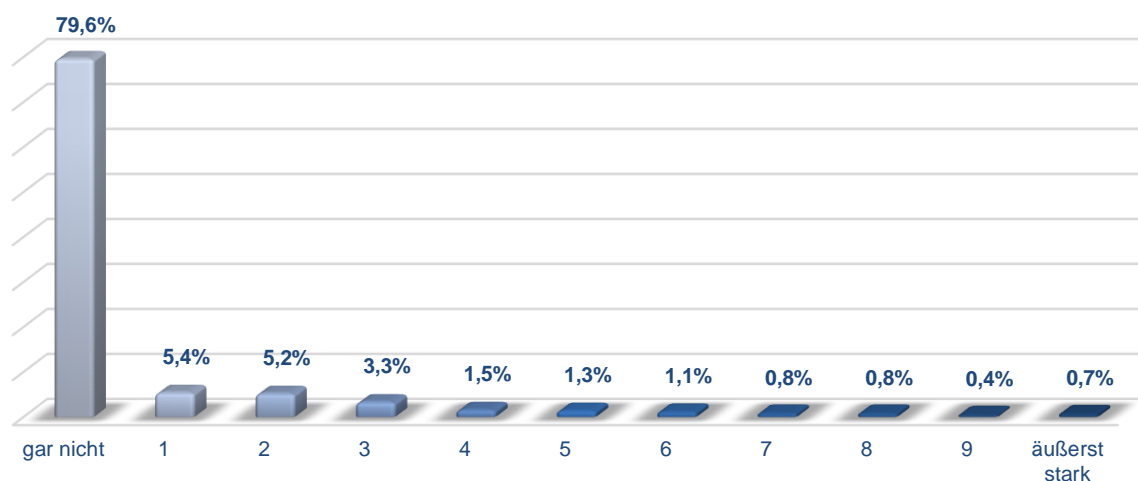

Im Mittel liegen die Antworten der befragten Probandinnen und Probanden bei 0,66 (7,3%).

**Tabelle 112: Empfundene Autobahnlärmexposition gruppiert**

|                        | Häufigkeit | Gültige Prozente | Kumulierte Prozente |
|------------------------|------------|------------------|---------------------|
| Gering exponiert       | 931        | 90,3             | 90,3                |
| Mittelgradig exponiert | 81         | 7,9              | 98,2                |
| Stark exponiert        | 19         | 1,8              | 100,0               |
| Gesamt                 | 1031       | 100,0            |                     |

### 10.1. Autobahnlärmexposition und Katastralgemeinden

Das im Mittel stärkste Autobahnlärmexpositionsempfinden zeigt sich in Wilten, gefolgt von Vill. Die geringste Ausgesetzttheit gegenüber Autobahnlärm im eigenen Wohnumfeld empfinden die Befragten in der Innenstadt (Katastralgemeinde Innsbruck), sowie in Igls, Pradl und Mühlau:

**Abbildung 134: Empfundene Autobahnlärmexposition und Katastralgemeinden im Mittelwertvergleich**

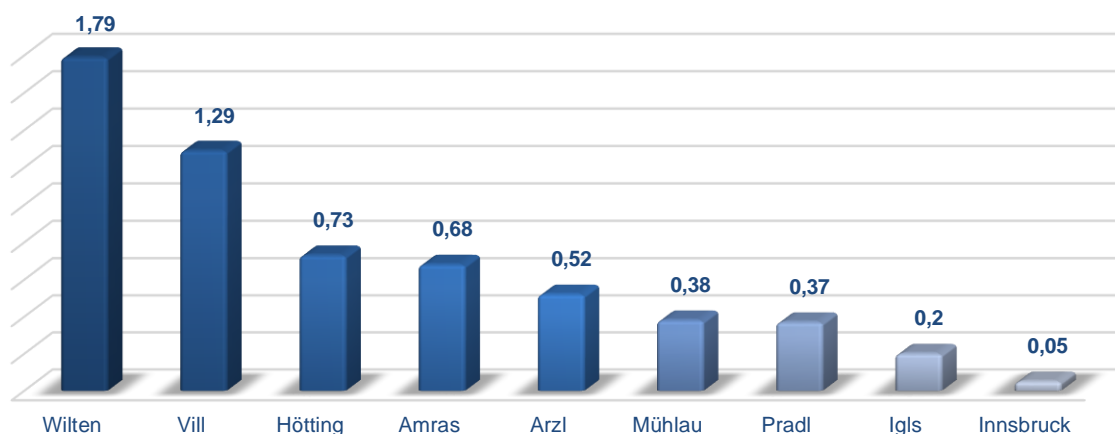

### 10.2. Autobahnlärmexposition und ausgewählte Parameter

Die Gruppe der sich stark autobahnlärmexponiert (*highly exposed*) empfindenden Befragten umfasst lediglich 19 Personen. In Bezug zu anderen Variablen gesetzt, vermindern sich die Fallzahlen auf eine zu kleine Anzahl für solide Auswertungen, weshalb diese Extremgruppe in der nachstehenden Tabelle nicht berücksichtigt wurde:

**Tabelle 113: Empfundene Autobahnlärmexposition und ausgewählte Parameter (gruppiert)**

|                                            |                           | Ausgesetzttheit Autobahnlärm gruppiert |            |                        |            |
|--------------------------------------------|---------------------------|----------------------------------------|------------|------------------------|------------|
|                                            |                           | Gering exponiert                       |            | Mittelgradig exponiert |            |
|                                            |                           | Anzahl                                 | Zeilen (%) | Anzahl                 | Zeilen (%) |
| <b>Geschlecht</b>                          | weiblich                  | 489                                    | 90,4%      | 40                     | 7,4%       |
|                                            | männlich                  | 442                                    | 90,2%      | 41                     | 8,4%       |
| <b>Altersgruppen</b>                       | 18 bis 40 Jahre           | 398                                    | 90,5%      | 37                     | 8,4%       |
|                                            | 41 bis 60 Jahre           | 287                                    | 90,8%      | 20                     | 6,3%       |
|                                            | über 60 Jahre             | 246                                    | 89,5%      | 24                     | 8,7%       |
| <b>Bildungsschicht</b>                     | Primärer Schulabschluss   | 89                                     | 90,8%      | 4                      | 4,1%       |
|                                            | Sekundärer Schulabschluss | 491                                    | 90,6%      | 43                     | 7,9%       |
|                                            | Tertiärer Schulabschluss  | 348                                    | 89,7%      | 34                     | 8,8%       |
| <b>Baulicher Schutz vor Verkehrslärm</b>   | Keiner bis geringfügig    | 681                                    | 88,9%      | 67                     | 8,7%       |
|                                            | Gut bis komplett          | 224                                    | 94,9%      | 11                     | 4,7%       |
| <b>Innenhof bzw. lärm-abgewandte Seite</b> | Ja                        | 651                                    | 92,9%      | 40                     | 5,7%       |
|                                            | Nein                      | 260                                    | 84,4%      | 40                     | 13,0%      |
| <b>Lärmschutzfenster</b>                   | Ja                        | 160                                    | 85,6%      | 20                     | 10,7%      |

|                                                             |                        |     |       |    |       |
|-------------------------------------------------------------|------------------------|-----|-------|----|-------|
| <b>in den letzten 10 Jahren eingebaut</b>                   | Nein                   | 610 | 90,8% | 51 | 7,6%  |
|                                                             | weiß nicht/ k.A.       | 161 | 93,6% | 10 | 5,8%  |
| <b>Zufriedenheit</b>                                        | Nicht zufrieden        | 22  | 78,6% | 4  | 14,3% |
| <b>Wohnsituation</b>                                        | Durchschnittlich       | 227 | 88,0% | 24 | 9,3%  |
| <b>insgesamt</b>                                            | Sehr zufrieden         | 681 | 91,5% | 53 | 7,1%  |
|                                                             | Nicht gut              | 8   | 80,0% | 2  | 20,0% |
| <b>Lebensqualität</b>                                       | Durchschnittlich       | 258 | 89,0% | 24 | 8,3%  |
|                                                             | Sehr gut               | 659 | 90,9% | 55 | 7,6%  |
|                                                             | Nicht lärmempfindlich  | 259 | 94,2% | 12 | 4,4%  |
| <b>Lärmempfindlichkeit</b>                                  | Durchschnittlich       | 524 | 89,7% | 48 | 8,2%  |
|                                                             | Sehr lärmempfindlich   | 148 | 86,0% | 21 | 12,2% |
| <b>Lautheit Innsbruck im Vergleich</b>                      | Ruhiger                | 268 | 91,8% | 19 | 6,5%  |
|                                                             | Gleich                 | 503 | 91,3% | 41 | 7,4%  |
|                                                             | Lauter                 | 147 | 84,5% | 20 | 11,5% |
| <b>Notwendigkeit (weiterer) Maßnahmen zur Lärmreduktion</b> | Ja                     | 614 | 88,9% | 61 | 8,8%  |
|                                                             | Nein                   | 178 | 92,7% | 12 | 6,3%  |
| <b>Belästigung Autobahnlärm</b>                             | Gering belästigt       | 915 | 96,6% | 30 | 3,2%  |
|                                                             | Mittelgradig belästigt | 13  | 21,0% | 44 | 71,0% |
|                                                             | Stark belästigt        | 3   | 13,6% | 7  | 31,8% |

Anm.: In mehreren Subgruppen sind die Fallzahlen für solide Auswertungen zu gering

## 11. Lärmexposition durch Gewerbe und Industrie

Am geringsten im Vergleich aller Lärmquellen sehen die befragten Innsbruckerinnen und Innsbrucker ihre Wohnungen dem Lärm von Gewerbe und Industrie ausgesetzt:

Abbildung 135: Empfundene Lärmexposition durch Gewerbe und Industrie in Prozent

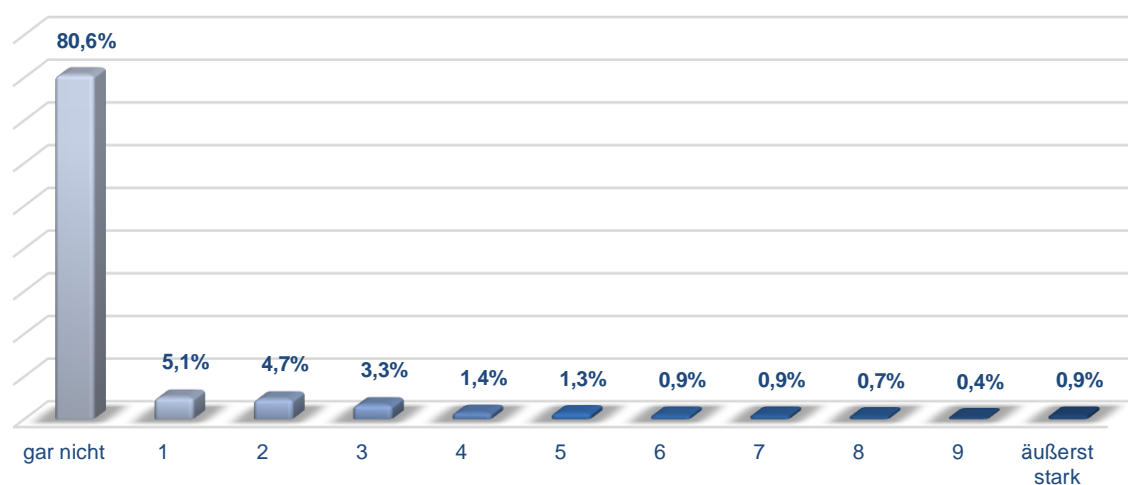

Über 80% erkennen gar keine Lärmexposition durch Gewerbe und Industrie, über 90% nur eine geringe (gruppierte Antwortkategorien 0 [=gar nicht], 1 und 2), 2% sehen ihr Wohnumfeld als stark ausgesetzt an (*highly exposed*: gruppierte Antwortkategorien 8, 9 und 10 [=äußerst stark]):

**Tabelle 114: Empfundene Lärmexposition durch Gewerbe und Industrie gruppiert**

|                        | Häufigkeit | Gültige Prozente | Kumulierte Prozente |
|------------------------|------------|------------------|---------------------|
| Gering exponiert       | 932        | 90,4             | 90,4                |
| Mittelgradig exponiert | 79         | 7,7              | 98,1                |
| Stark exponiert        | 20         | 1,9              | 100,0               |
| Gesamt                 | 1031       | 100,0            |                     |

Im Mittel liegen die Antworten der befragten Probandinnen und Probanden bei 0,65 (7,2%).

### 11.1. Lärmexposition Gewerbe und Industrie und Katastralgemeinden

Das Empfinden der eigenen Ausgesetzttheit gegenüber dem Lärm von Gewerbe und Industrie ist in Vill und Mühlau am geringsten und in Wilten, Innsbruck und Arzl am stärksten ausgeprägt:

**Abbildung 136: Empfundene Lärmexposition durch Gewerbe und Industrie und Katastralgemeinden im Mittelwertvergleich**

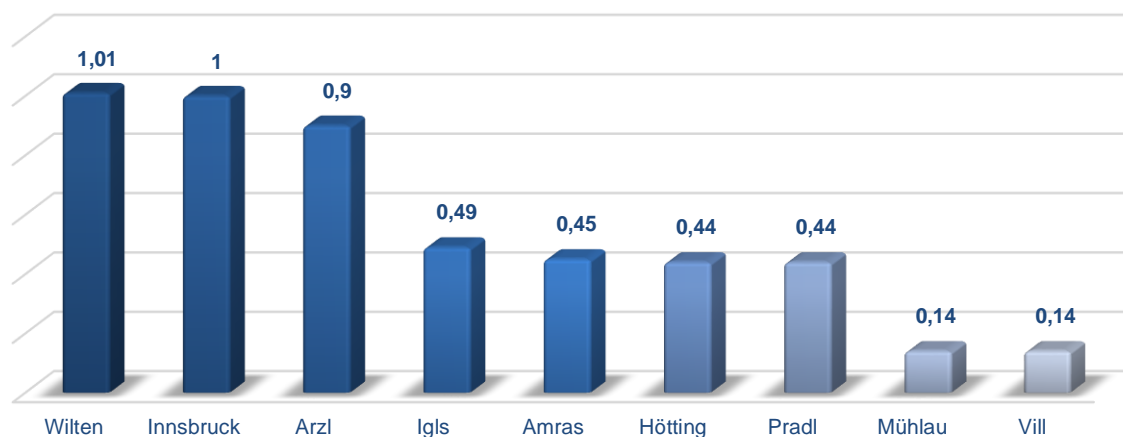

### 11.2. Lärmexposition Gewerbe und Industrie und einzelne Parameter

Die Gruppe der sich stark dem Lärm von Gewerbe und Industrie exponiert empfindenden Befragten (*highly exposed*) umfasst lediglich 20 Personen. In Bezug zu anderen Variablen gesetzt, vermindern sich die Fallzahlen auf eine zu kleine Anzahl für solide Auswertungen, weshalb diese Extremgruppe in der nachstehenden Tabelle nicht berücksichtigt wurde:

**Tabelle 115: Empfundene Lärmexposition durch Gewerbe und Industrie und ausgewählte Parameter**

|                                                             |                           | Ausgesetztheit Lärm von Gewerbe und Industrie gruppiert |            |                        |            |
|-------------------------------------------------------------|---------------------------|---------------------------------------------------------|------------|------------------------|------------|
|                                                             |                           | Gering exponiert                                        |            | Mittelgradig exponiert |            |
|                                                             |                           | Anzahl                                                  | Zeilen (%) | Anzahl                 | Zeilen (%) |
| <b>Geschlecht</b>                                           | weiblich                  | 493                                                     | 91,1%      | 36                     | 6,7%       |
|                                                             | männlich                  | 439                                                     | 89,6%      | 43                     | 8,8%       |
| <b>Altersgruppen</b>                                        | 18 bis 40 Jahre           | 401                                                     | 91,1%      | 32                     | 7,3%       |
|                                                             | 41 bis 60 Jahre           | 284                                                     | 89,9%      | 24                     | 7,6%       |
|                                                             | über 60 Jahre             | 247                                                     | 89,8%      | 23                     | 8,4%       |
| <b>Bildungsschicht</b>                                      | Primärer Schulabschluss   | 89                                                      | 90,8%      | 7                      | 7,1%       |
|                                                             | Sekundärer Schulabschluss | 492                                                     | 90,8%      | 40                     | 7,4%       |
|                                                             | Tertiärer Schulabschluss  | 348                                                     | 89,7%      | 32                     | 8,2%       |
| <b>Baulicher Schutz vor Verkehrslärm</b>                    | Keiner bis geringfügig    | 678                                                     | 88,5%      | 69                     | 9,0%       |
|                                                             | Gut bis komplett          | 225                                                     | 95,3%      | 10                     | 4,2%       |
| <b>Innenhof bzw. lärm-abgewandte Seite</b>                  | Ja                        | 639                                                     | 91,2%      | 56                     | 8,0%       |
|                                                             | Nein                      | 271                                                     | 88,0%      | 23                     | 7,5%       |
| <b>Lebensbedingungen (Summenscore)</b>                      | Nicht gut                 | 4                                                       | 80,0%      | 0                      | 0,0%       |
|                                                             | Durchschnittlich          | 595                                                     | 88,8%      | 58                     | 8,7%       |
|                                                             | Sehr gut                  | 333                                                     | 93,5%      | 21                     | 5,9%       |
| <b>Zufriedenheit</b>                                        | Nicht zufrieden           | 20                                                      | 71,4%      | 7                      | 25,0%      |
| <b>Wohnsituation</b>                                        | Durchschnittlich          | 219                                                     | 84,9%      | 28                     | 10,9%      |
| <b>insgesamt</b>                                            | Sehr zufrieden            | 693                                                     | 93,1%      | 43                     | 5,8%       |
| <b>Lebensqualität</b>                                       | Nicht gut                 | 8                                                       | 80,0%      | 1                      | 10,0%      |
|                                                             | Durchschnittlich          | 251                                                     | 86,6%      | 34                     | 11,7%      |
|                                                             | Sehr gut                  | 667                                                     | 92,0%      | 44                     | 6,1%       |
| <b>Lärmempfindlichkeit</b>                                  | Nicht lärmempfindlich     | 256                                                     | 93,1%      | 17                     | 6,2%       |
|                                                             | Durchschnittlich          | 523                                                     | 89,6%      | 46                     | 7,9%       |
|                                                             | Sehr lärmempfindlich      | 153                                                     | 89,0%      | 16                     | 9,3%       |
| <b>Zunahme</b>                                              | Ja                        | 376                                                     | 86,2%      | 44                     | 10,1%      |
| <b>Lärmbelastung</b>                                        | Nein                      | 556                                                     | 93,4%      | 35                     | 5,9%       |
| <b>Abnahme</b>                                              | Ja                        | 58                                                      | 100,0%     | 0                      | 0,0%       |
| <b>Lärmbelastung</b>                                        | Nein                      | 874                                                     | 89,8%      | 79                     | 8,1%       |
| <b>Lautheit Innsbruck im Vergleich</b>                      | Ruhiger                   | 275                                                     | 94,2%      | 9                      | 3,1%       |
|                                                             | Gleich                    | 494                                                     | 89,7%      | 47                     | 8,5%       |
|                                                             | Lauter                    | 149                                                     | 85,6%      | 23                     | 13,2%      |
| <b>Notwendigkeit (weiterer) Maßnahmen zur Lärmreduktion</b> | Ja                        | 611                                                     | 88,4%      | 62                     | 9,0%       |
|                                                             | Nein                      | 183                                                     | 95,3%      | 8                      | 4,2%       |
| <b>Belästigung</b>                                          | Gering belästigt          | 895                                                     | 95,5%      | 38                     | 4,1%       |
| <b>Lärm von Gewerbe und Industrie</b>                       | Mittelgradig belästigt    | 36                                                      | 45,6%      | 39                     | 49,4%      |
|                                                             | Stark belästigt           | 1                                                       | 6,7%       | 2                      | 13,3%      |

Anm.: In mehreren Subgruppen sind die Fallzahlen für solide Auswertungen zu gering

## Belästigung / Störung durch Lärm

### 1. Überblick Belästigung / Störung durch Lärm

#### 1.1. Belästigung nach Lärmquelle

Die Einschätzung der Belästigung / Störung durch Lärm wurde für jede einzelne Lärmquelle mittels einer 11-teiligen Skala von 0=*belästigt / stört überhaupt nicht* bis 10=*belästigt / stört besonders stark* abgefragt.

Im Mittelwertvergleich zeigt sich, dass die Belästigung / Störung durch den Flugverkehrslärm am höchsten eingeschätzt wird, gefolgt von der Belästigung durch den Straßenverkehrslärm. Die weiteren Lärmquellen folgen mit deutlichem Abstand. Die Störung durch Nachbarschaftslärm und den Lärm verursacht durch Passanten und Gaststätten fällt geringer aus, als die Belästigungswahrnehmung von Baustellen. Wiederum in ihrer Ausprägung deutlich dahinter schließen sich Schienenverkehrslärm und die Störung durch Erschütterungen an. Die Belästigungsreaktion auf Lärm aus Gewerbe und Industrie und durch Autobahnlärm fällt im Vergleich noch einmal deutlich geringer aus:<sup>10</sup>

**Abbildung 137: Mittelwertvergleich der Belästigung nach Quelle**

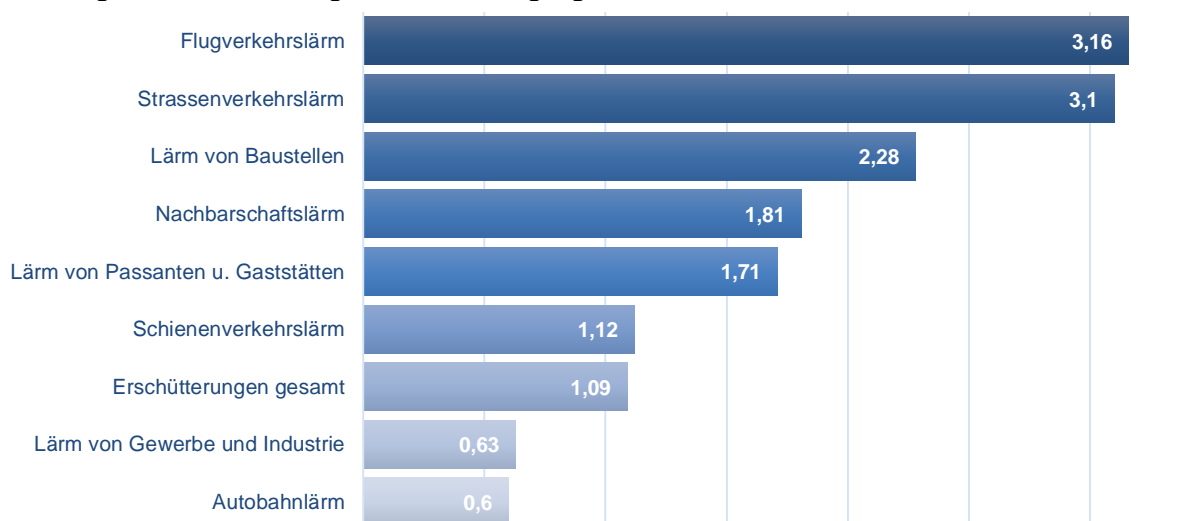

**Tabelle 116: Mittelwerte der Belästigung nach Quelle**

|                          | Flug-<br>verkehr | Strassen-<br>verkehr | Bau-<br>stellen | Nach-<br>barschaft | Passanten u.<br>Gaststätten | Schienen-<br>verkehr | Erschüt-<br>terungen | Gewerbe<br>u. Industrie | Auto-<br>bahn |
|--------------------------|------------------|----------------------|-----------------|--------------------|-----------------------------|----------------------|----------------------|-------------------------|---------------|
| Mittelwert               | 3,16             | 3,10                 | 2,28            | 1,81               | 1,71                        | 1,12                 | 1,09                 | ,63                     | ,60           |
| N                        | 1031             | 1031                 | 1030            | 1031               | 1031                        | 1031                 | 1031                 | 1031                    | 1031          |
| Standard-<br>abweichung  | 2,868            | 2,893                | 3,006           | 2,457              | 2,473                       | 2,151                | 2,171                | 1,672                   | 1,702         |
| Standardfehler<br>des MW | ,089             | ,090                 | ,094            | ,077               | ,077                        | ,067                 | ,068                 | ,052                    | ,053          |

<sup>10</sup> Anm.: Die eigenständige Frage nach der Belästigung / Störung durch *Lärm insgesamt* wird in den folgenden vergleichenden Zusammenstellungen der einzelnen Lärmquellen ausgeklammert und im anschließenden Unterkapitel dargestellt.

Die Vergleiche der Belästigung nach Quelle decken sich weitgehend mit den Auswertungen zur empfundenen Exposition, was auch die Validität und Reliabilität der Items unterstreicht. Der Mittelwert aller Antworten über alle 9 Fragen hinweg liegt bei 1,72 (18,9%).

Kategorisiert in 3 Belästigungsgruppen:

- **gering belästigt:** gruppierte Antwortkategorien 0 [=belästigt / stört überhaupt nicht]), 1 und 2
- **mittelgradig belästigt:** gruppierte Antwortkategorien 3 bis 7
- **stark belästigt (highly annoyed):** gruppierte Antwortkategorien 8, 9 und 10 [=belästigt / stört besonders stark])

stellt sich die Belästigungsreaktion nach Quelle wie folgt dar:

**Abbildung 138: Belästigung nach Quelle kategorisiert in 3 Expositionsgruppen in Prozent**

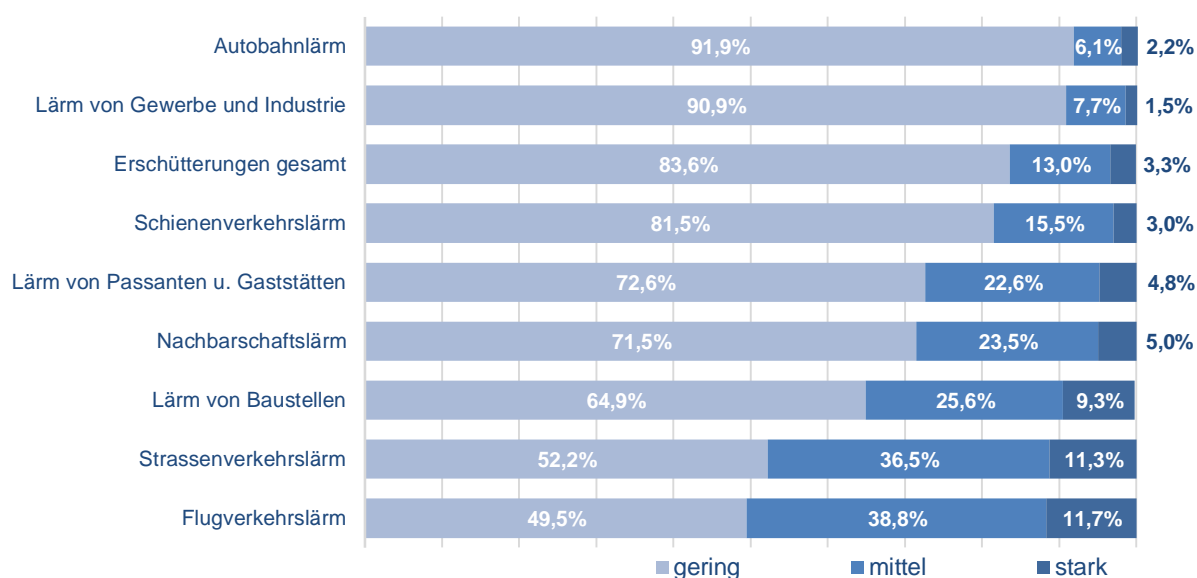

\* Nach Belästigungsausmaß (Mittelwert) aufsteigend sortiert

Wird nur die Extremgruppe der sich stark belästigt fühlenden Befragten (*highly annoyed*) betrachtet, zeigt sich im Vergleich der Quellen nahezu dasselbe Bild:

**Abbildung 139: Extremgruppenvergleich *highly annoyed* nach Quelle in Prozent**

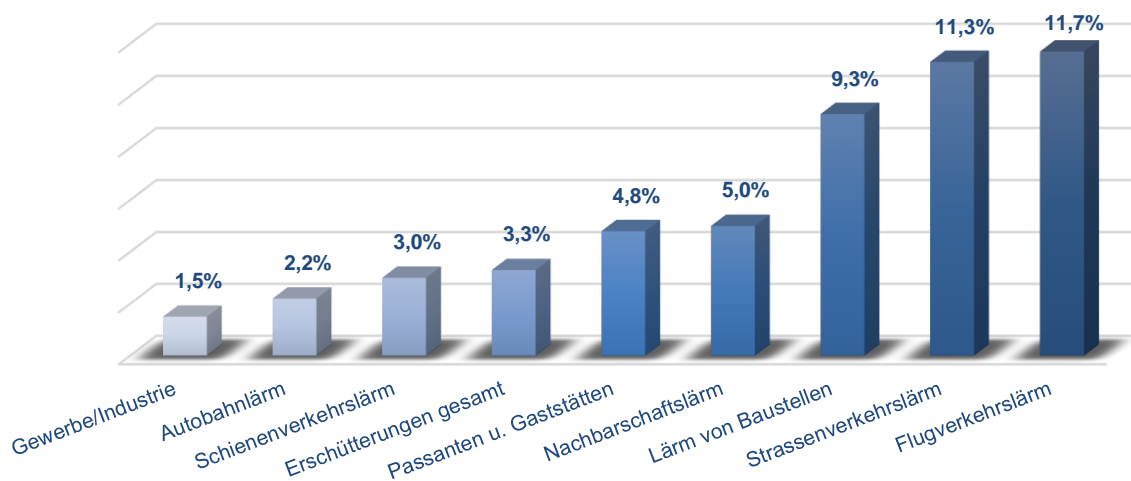

\* Nach Belästigungsausmaß (Häufigkeit) aufsteigend sortiert

## 1.2. Belästigung und Verkehrslärmbelastung

Das Ausmaß der Belästigung durch Verkehrslärm zeigt einen deutlichen Zusammenhang zur gegebenen Lärmbelastung: Je höher die Verkehrslärmbelastung, desto höher die Belästigung. Allerdings unterscheiden sich die Belästigungsreaktionen in ihrer Ausprägung je nach Verkehrslärmquelle stark voneinander. Flugverkehrslärm wird in allen Belastungskategorien als störender eingestuft als der Straßenverkehrslärm und dieser wiederum als deutlich belästigender als der Schienenverkehrslärm:

**Abbildung 140: Belästigung und Verkehrslärmbelastung nach Quelle 24h-Pegel ( $L_{den}$ ) gruppiert im Mittelwertvergleich**

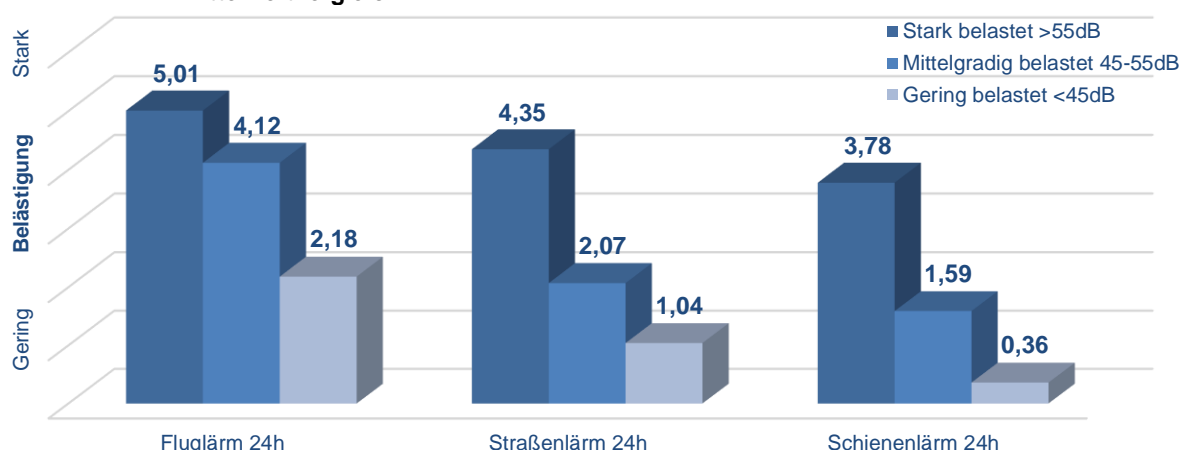

Wird das gemittelte Belästigungsausmaß nach vorhandener Lärmbelastung in 10dB-Schritten (24-Pegel  $L_{den}$ ) nach Verkehrslärmquelle verglichen, wird deutlich, dass das Belästigungsausmaß beim Straßen- und Schienenverkehr erst bei Dauerschallpegeln über 50dB stärker zu steigen beginnt, bis zu diesen Pegeln jedoch von den Befragten relativ niedrig eingeschätzt wird. Ab diesen „Schwellenwerten“ steigt das Belästigungsausmaß stark an und erreicht bei Dauerschallpegeln über 60dB ähnliche Ausprägungen für alle 3 Verkehrslärmquellen:<sup>11</sup>

**Abbildung 141: Belästigung und Verkehrslärmbelastung nach Quelle 24h-Pegel ( $L_{den}$ ) in 10dB-Schritten im Mittelwertvergleich**

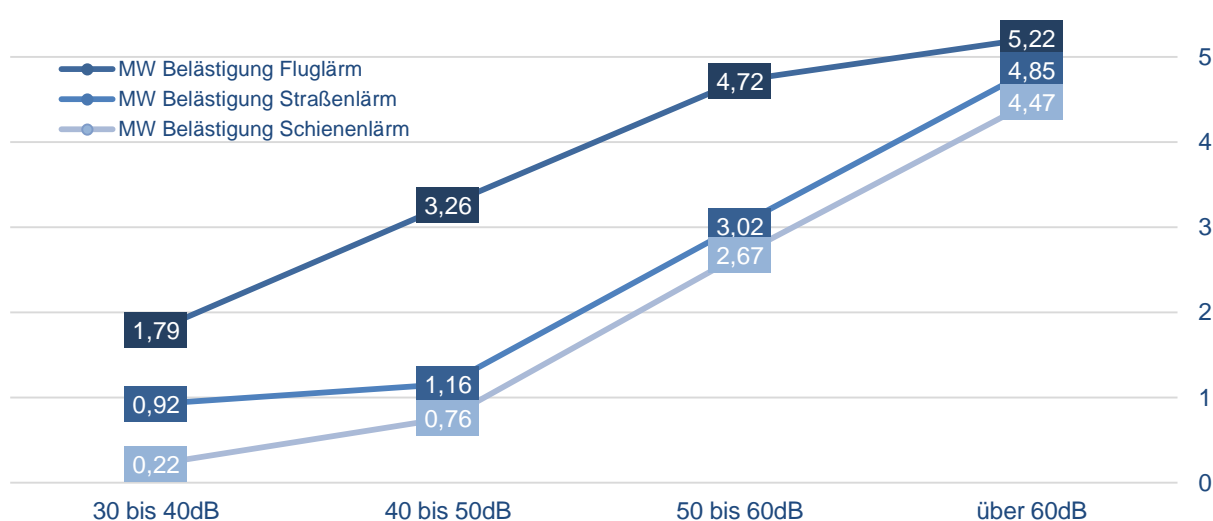

<sup>11</sup> Anm.: Die Darstellung zeigt nachvollziehbare Zusammenhänge auf, enthält jedoch keine Prüfungen auf Kovariablen und andere Prädiktoren und ist somit nicht den Dosis-Wirkungskurven aus der gängigen Fachliteratur gleichzusetzen.



Für den Flugverkehrslärm lässt sich diese Schwelle nicht festmachen. Das Belästigungsausmaß liegt bereits bei niedrigen Dauerlärmpegeln höher als beim Straßen- und Schienenverkehrslärm und steigt linearer an.

Die gegebenen Belastungen durch den Schienenverkehrslärm verursachen durchgehend eine geringere Belästigungsreaktion bei den befragten Innsbruckerinnen und Innsbruckern als der Straßen- und Flugverkehrslärm.

In der Kombination der Fragen zur Belästigung mit denjenigen zur empfundenen Ausgesetzttheit gegenüber den einzelnen Verkehrslärmquellen, sowie der gegebenen Lärmbelastung zeigt sich die hohe Reliabilität der verwendeten Items und Skalen (siehe dazu auch die folgenden Kapitel zur spezifischen Flug-, Straßen- und Schienenverkehrslärmbelästigung).

### 1.3. Belästigung und Katastralgemeinden

#### 1.3.1. Belästigung nach Quelle und Katastralgemeinden

Insgesamt am stärksten vom Lärm belästigt / gestört zeigen sich die befragten Innsbruckerinnen und Innsbrucker in Wilten, gefolgt von Innsbruck, Pradl und Hötting. In der Summe aller Lärmquellen am geringsten belästigt empfinden sich die Bewohnerinnen und Bewohner von Igls, Vill und Mühlau:

**Abbildung 142: Belästigung nach Lärmquelle und Katastralgemeinde im Mittelwertvergleich**

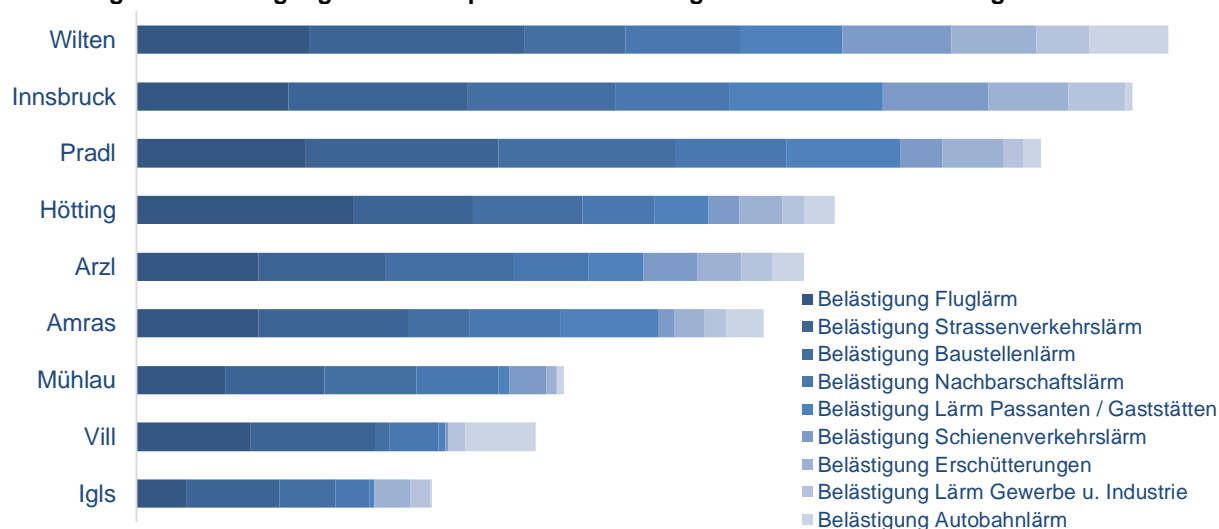

\* Nach Belästigungsausmaß (Häufigkeit) absteigend sortiert

**Tabelle 117: Belästigung nach Lärmquelle und Katastralgemeinde im Mittelwertvergleich**

| Belästigung durch Lärm ausgehend von |    |       |        |            |                    |                            |         |                      |                        |               |
|--------------------------------------|----|-------|--------|------------|--------------------|----------------------------|---------|----------------------|------------------------|---------------|
| Katastralge-<br>meinde               |    | Flug  | Straße | Baustellen | Nachbar-<br>schaft | Passanten /<br>Gaststätten | Schiene | Erschüt-<br>terungen | Gewerbe /<br>Industrie | Auto-<br>bahn |
|                                      | MW | 2,38  | 2,95   | 1,18       | 1,78               | 1,92                       | ,32     | ,58                  | ,43                    | ,73           |
| Amras                                | N  | 60    | 60     | 60         | 60                 | 60                         | 60      | 60                   | 60                     | 60            |
|                                      | SA | 2 100 | 2 770  | 1 742      | 2 565              | 2 424                      | 792     | 1 576                | 1 332                  | 1 561         |

|                  |           |             |             |             |             |             |             |             |             |             |
|------------------|-----------|-------------|-------------|-------------|-------------|-------------|-------------|-------------|-------------|-------------|
|                  | <b>MW</b> | <b>2,38</b> | <b>2,50</b> | <b>2,51</b> | <b>1,45</b> | <b>1,08</b> | <b>1,05</b> | <b>,86</b>  | <b>,62</b>  | <b>,61</b>  |
| <b>Arzl</b>      | N         | 102         | 102         | 102         | 102         | 102         | 102         | 102         | 102         | 102         |
|                  | SA        | 2,413       | 2,695       | 2,824       | 2,146       | 2,047       | 2,140       | 1,872       | 1,516       | 1,684       |
|                  | <b>MW</b> | <b>4,25</b> | <b>2,33</b> | <b>2,15</b> | <b>1,40</b> | <b>1,06</b> | <b>,61</b>  | <b>,84</b>  | <b>,44</b>  | <b>,59</b>  |
| <b>Hötting</b>   | N         | 243         | 243         | 243         | 243         | 243         | 243         | 243         | 243         | 243         |
|                  | SA        | 3,265       | 2,781       | 6,873       | 2,109       | 1,953       | 1,569       | 1,991       | 1,542       | 1,439       |
|                  | <b>MW</b> | <b>,97</b>  | <b>1,83</b> | <b>1,09</b> | <b>,66</b>  | <b>,11</b>  | <b>,00</b>  | <b>,69</b>  | <b>,40</b>  | <b>,03</b>  |
| <b>Igls</b>      | N         | 35          | 35          | 35          | 35          | 35          | 35          | 35          | 35          | 35          |
|                  | SA        | 1,272       | 1,723       | 1,853       | 1,282       | ,471        | ,000        | 1,231       | 1,063       | ,169        |
|                  | <b>MW</b> | <b>2,98</b> | <b>3,50</b> | <b>2,88</b> | <b>2,24</b> | <b>3,01</b> | <b>2,06</b> | <b>1,57</b> | <b>1,11</b> | <b>,14</b>  |
| <b>Innsbruck</b> | N         | 176         | 176         | 176         | 176         | 176         | 176         | 176         | 176         | 176         |
|                  | SA        | 2,644       | 2,820       | 2,892       | 2,563       | 2,808       | 2,690       | 2,187       | 2,146       | 1,035       |
|                  | <b>MW</b> | <b>1,74</b> | <b>1,94</b> | <b>1,80</b> | <b>1,60</b> | <b>,22</b>  | <b>,72</b>  | <b>,20</b>  | <b>,02</b>  | <b>,12</b>  |
| <b>Mühlau</b>    | N         | 50          | 50          | 50          | 50          | 50          | 50          | 50          | 50          | 50          |
|                  | SA        | 1,925       | 2,280       | 2,499       | 2,185       | ,616        | 1,885       | ,782        | ,141        | ,435        |
|                  | <b>MW</b> | <b>3,31</b> | <b>3,78</b> | <b>3,47</b> | <b>2,16</b> | <b>2,24</b> | <b>,81</b>  | <b>1,20</b> | <b>,39</b>  | <b>,34</b>  |
| <b>Pradl</b>     | N         | 188         | 188         | 188         | 188         | 188         | 188         | 188         | 188         | 188         |
|                  | SA        | 2,861       | 3,159       | 3,682       | 2,664       | 2,752       | 1,805       | 2,454       | 1,158       | 1,275       |
|                  | <b>MW</b> | <b>2,24</b> | <b>2,43</b> | <b>,29</b>  | <b>,95</b>  | <b>,14</b>  | <b>,05</b>  | <b>,00</b>  | <b>,33</b>  | <b>1,38</b> |
| <b>Vill</b>      | N         | 21          | 21          | 21          | 21          | 21          | 21          | 21          | 21          | 21          |
|                  | SA        | 1,758       | 2,181       | ,561        | 1,830       | ,478        | ,218        | ,000        | ,966        | 2,598       |
|                  | <b>MW</b> | <b>3,38</b> | <b>4,22</b> | <b>1,97</b> | <b>2,24</b> | <b>2,01</b> | <b>2,13</b> | <b>1,66</b> | <b>1,04</b> | <b>1,54</b> |
| <b>Wilten</b>    | N         | 156         | 156         | 156         | 156         | 156         | 156         | 156         | 156         | 156         |
|                  | SA        | 2,899       | 2,815       | 2,828       | 2,838       | 2,561       | 2,673       | 2,725       | 2,186       | 2,769       |
|                  | <b>MW</b> | <b>3,16</b> | <b>3,10</b> | <b>2,38</b> | <b>1,81</b> | <b>1,71</b> | <b>1,12</b> | <b>1,09</b> | <b>,63</b>  | <b>,60</b>  |
| <b>Gesamt</b>    | N         | 1031        | 1031        | 1031        | 1031        | 1031        | 1031        | 1031        | 1031        | 1031        |
|                  | SA        | 2,868       | 2,893       | 4,254       | 2,457       | 2,473       | 2,151       | 2,171       | 1,672       | 1,702       |

### 1.3.2. Verkehrslärmbelästigung und Katastralgemeinden

**Abbildung 143: Belästigung nach Verkehrslärmquelle und Katastralgemeinde im Mittelwertvergleich**

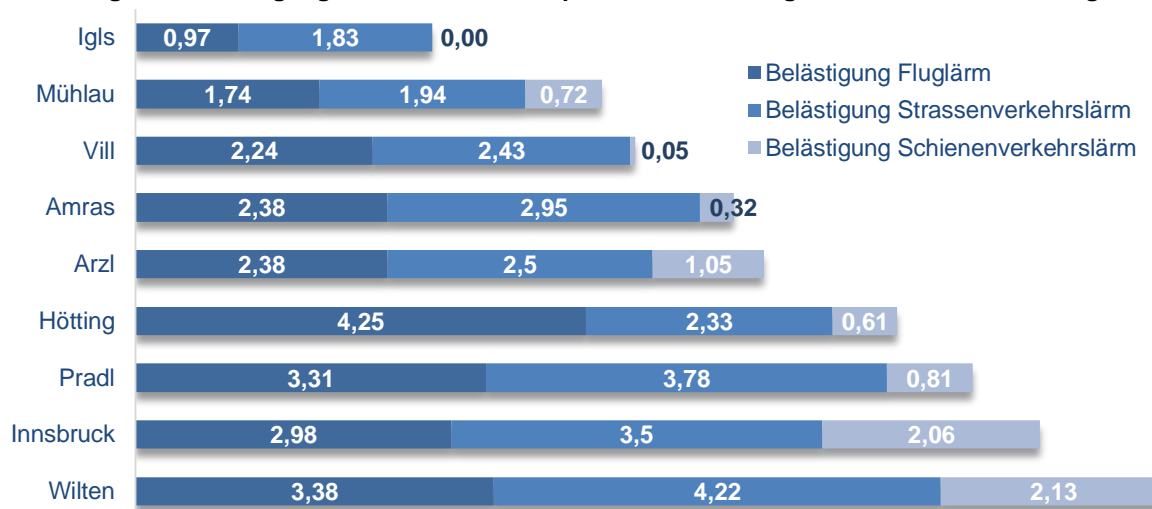

\* Nach Belästigungsausmaß (Häufigkeit) aufsteigend sortiert

Die stärksten Lärmbelästigungen gehen vom Verkehrslärm aus, daher zeigt sich in der Betrachtung des Ausmaßes der reinen Verkehrslärmbelästigung ein beinahe identes Ranking der Katastralgemeinden. In Vill sind die Belästigungen durch Straßenverkehrslärm (Autobahn) etwas höher, weshalb Vill mit Mühlau die Plätze tauscht.

### 1.3.3. Nicht verkehrsverursachte Belästigung und Katastralgemeinden

Baustellenlärm, Erschütterungen, aber auch der Lärm aus Gewerbe und Industrie sind zum Teil ebenfalls verkehrsbedingt. Werden dennoch die Mittelwerte der nicht direkt verkehrsverursachten Lärmbelästigungsausmaße summiert dargestellt, ändert sich die Verteilung der Katastralgemeinden:

**Abbildung 144: Belästigung nach nicht verkehrsverursachten Lärmquellen und Katastralgemeinde im Mittelwertvergleich**

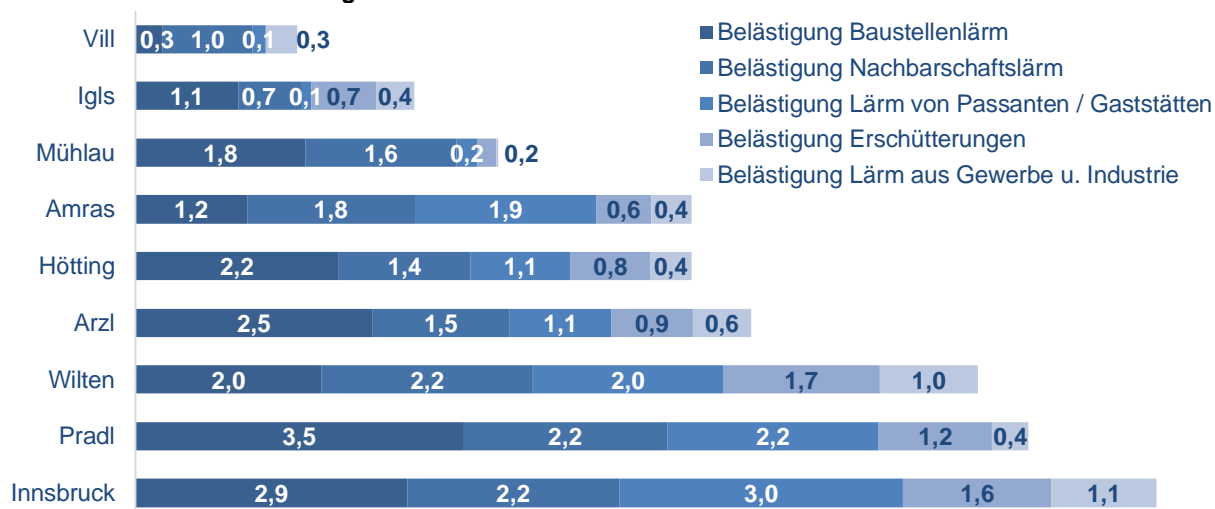

\* Nach Belästigungsausmaß (Häufigkeit) aufsteigend sortiert

## 2. Belästigung durch Lärm insgesamt

Die Belästigung durch Lärm insgesamt wurde mittels einem eigenen Item zusätzlich abgefragt:

**Abbildung 145: Belästigung durch Lärm insgesamt in Prozent**

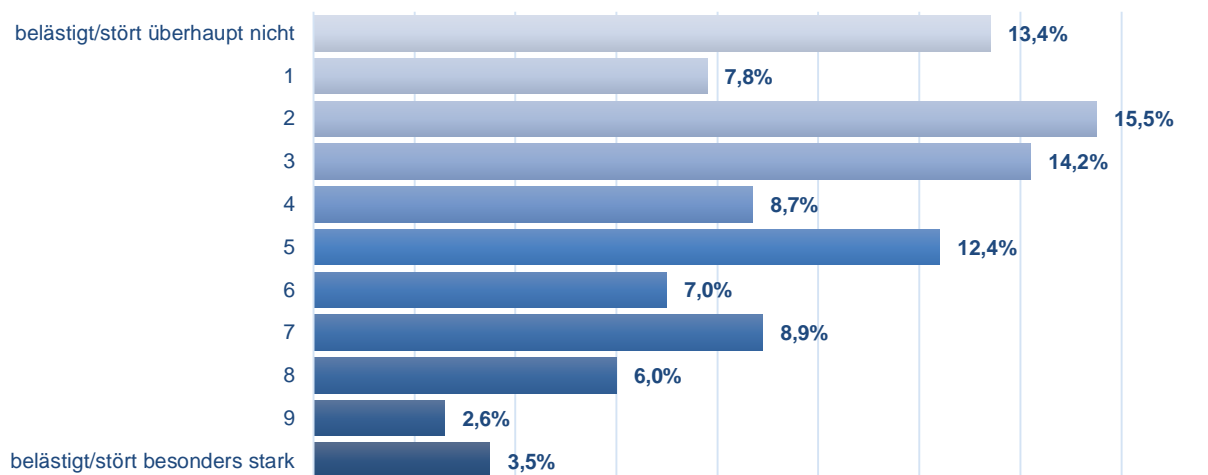

12,1% aller befragten Innsbruckerinnen und Innsbrucker schätzen sich selbst als vom Lärm insgesamt stark belästigt ein (*highly annoyed*: gruppierte Antwortkategorien 8, 9 und 10 [=belästigt / stört besonders stark]), etwas mehr als die Hälfte (51,2%) antworten in den mittleren Kategorien und 36,7% aller Probandinnen und Probanden sehen sich selbst als nur gering lärmbelästigt an (gruppierte Antwortkategorien 0 [=belästigt / stört überhaupt nicht], 1 und 2).

**Tabelle 118: Belästigung durch Lärm insgesamt gruppiert**

|                        | Häufigkeit | Gültige Prozente | Kumulierte Prozente |
|------------------------|------------|------------------|---------------------|
| Gering belästigt       | 378        | 36,7             | 36,7                |
| Mittelgradig belästigt | 528        | 51,2             | 87,9                |
| Stark belästigt        | 125        | 12,1             | 100,0               |
| Gesamt                 | 1031       | 100,0            |                     |

Im Mittel liegen die Antworten der befragten Probandinnen und Probanden bei 3,89 (42,8%).

### 2.1. Belästigung durch Lärm insgesamt und Katastralgemeinden

Im Mittel die größte Störung durch Lärm insgesamt wird in Wilten und Innsbruck empfunden, dicht gefolgt von Pradl. Die geringste Belästigung durch Lärm insgesamt im eigenen Wohnumfeld empfinden die Befragten in Igls, Mühlau und Arzl:

**Abbildung 146: Belästigung durch Lärm insgesamt und Katastralgemeinden im Mittelwertvergleich**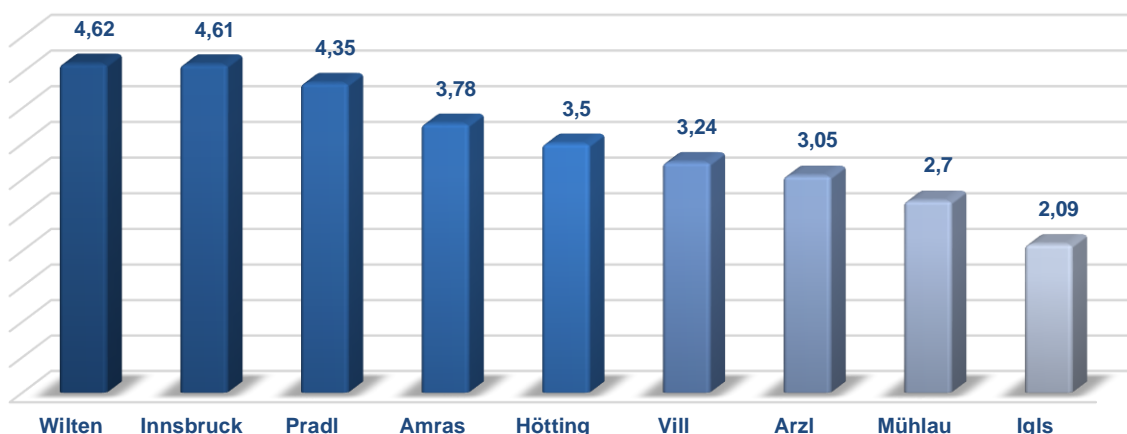

## 2.2. Belästigung durch Lärm insgesamt und ausgewählte Parameter

Frauen empfinden sich insgesamt stärker vom Lärm belästigt als Männer, ebenso die mittlere Altersgruppe der 41- bis 60-Jährigen im Vergleich zu den Jüngeren und Älteren.

Befragte, in deren Haushalt minderjährige Kinder leben, die zumeist bei geöffnetem oder gekippten Fenster schlafen, die in ihrem Wohnumfeld über eine lärmabgewandte Seite oder einen Innenhof verfügen, empfinden sich weniger vom Lärm gestört.

Der starke Bezug zum Verkehrslärm zeigt sich auch in Zusammenschau mit der Frage nach baulichem Schutz vor demselben:

**Abbildung 147: Belästigung durch Lärm insgesamt und baulicher Schutz vor Verkehrslärm im Extremgruppenvergleich in Prozent**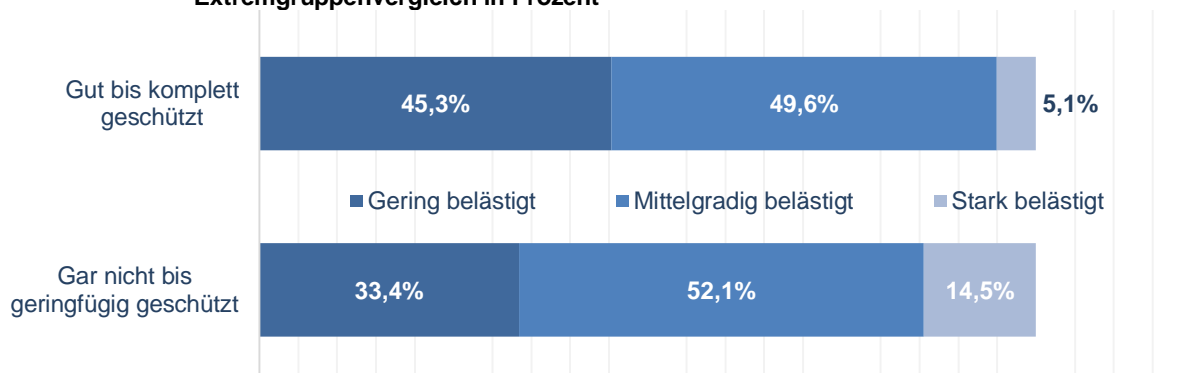

Deutlich zeigen sich auch Beziehungen zwischen dem Ausmaß der Belästigung durch Lärm insgesamt und der Einschätzung und Zufriedenheit mit den eigenen Lebens- und Wohnbedingungen, den Bedingungen für das Aufwachsen von Kindern, oder auch der Verbundenheit zur Stadt Innsbruck:

Je geringer das persönliche Ausmaß der Belästigung durch Lärm bewertet wird, desto höher werden die eigenen Lebens- und Wohnbedingungen eingeschätzt und vice versa:

**Tabelle 119: Bedingungen für das Aufwachsen von Kindern und Belästigung durch Lärm insgesamt**

| Belästigung Lärm gesamt         | Mittelwert  | N    | Standardabweichung | Standardfehler MW |
|---------------------------------|-------------|------|--------------------|-------------------|
| belästigt/stört überhaupt nicht | <b>7,78</b> | 136  | 2,152              | ,185              |
| 1                               | <b>7,40</b> | 78   | 1,783              | ,202              |
| 2                               | <b>7,18</b> | 158  | 2,044              | ,163              |
| 3                               | <b>6,85</b> | 142  | 2,131              | ,179              |
| 4                               | <b>6,80</b> | 86   | 2,034              | ,219              |
| 5                               | <b>6,67</b> | 126  | 2,161              | ,193              |
| 6                               | <b>6,27</b> | 71   | 2,104              | ,250              |
| 7                               | <b>6,28</b> | 88   | 2,387              | ,255              |
| 8                               | <b>6,28</b> | 61   | 2,511              | ,321              |
| 9                               | <b>6,59</b> | 27   | 2,406              | ,463              |
| belästigt/stört besonders stark | <b>5,14</b> | 36   | 2,949              | ,491              |
| Insgesamt                       | <b>6,85</b> | 1009 | 2,246              | ,071              |

**Abbildung 148: Zufriedenheit mit der eigenen Wohnsituation und Belästigung durch Lärm insgesamt im Mittelwertvergleich**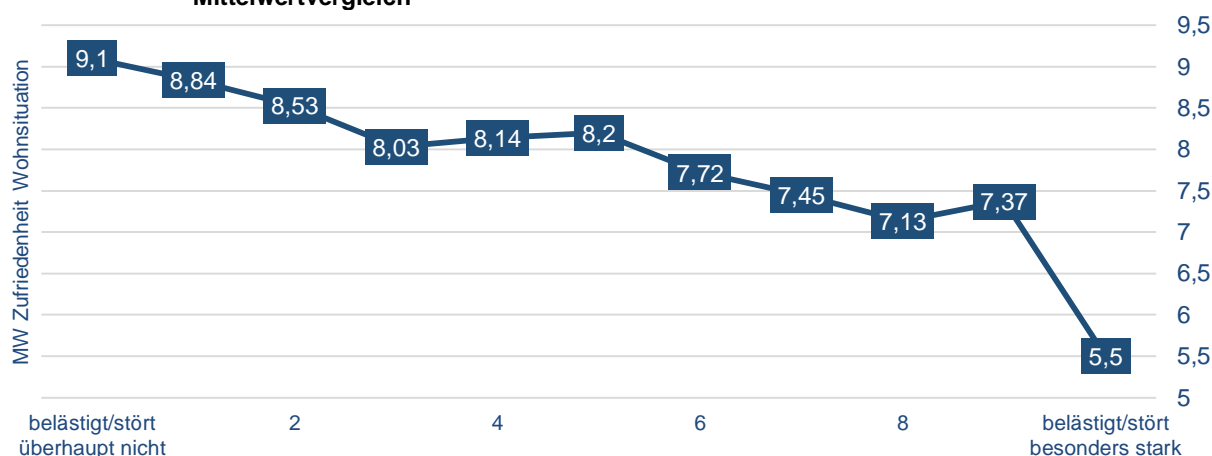

Dasselbe gilt auch für die Beziehungen zur Einschätzung der eigenen Lebensqualität und Lärmempfindlichkeit und einer ganzen Reihe anderer Parameter: Befragte Innsbruckerinnen und Innsbrucker, die sich stärker lärmbelästigt als andere fühlen,

- beurteilen das Lärmniveau in Innsbruck im Vergleich zu anderen österreichischen Städten schlechter,
- gehen häufiger davon aus, dass der Lärm insgesamt in den letzten Jahren zugenommen hat,
- schätzen die negativen Wirkungen von Lärm auf die Gesundheit stärker ein
- wenden häufiger Lärmadaptationsmechanismen an,
- sind wesentlich häufiger für (weitere) Maßnahmen zur Lärmreduktion,
- zeigen insgesamt in Bezug zu Beurteilungen der eigenen Wohn- und Lebensbedingungen eine deutlich negativere Grundhaltung.

Abbildung 149: Lärmempfindlichkeit und Belästigung durch Lärm insgesamt im Mittelwertvergleich

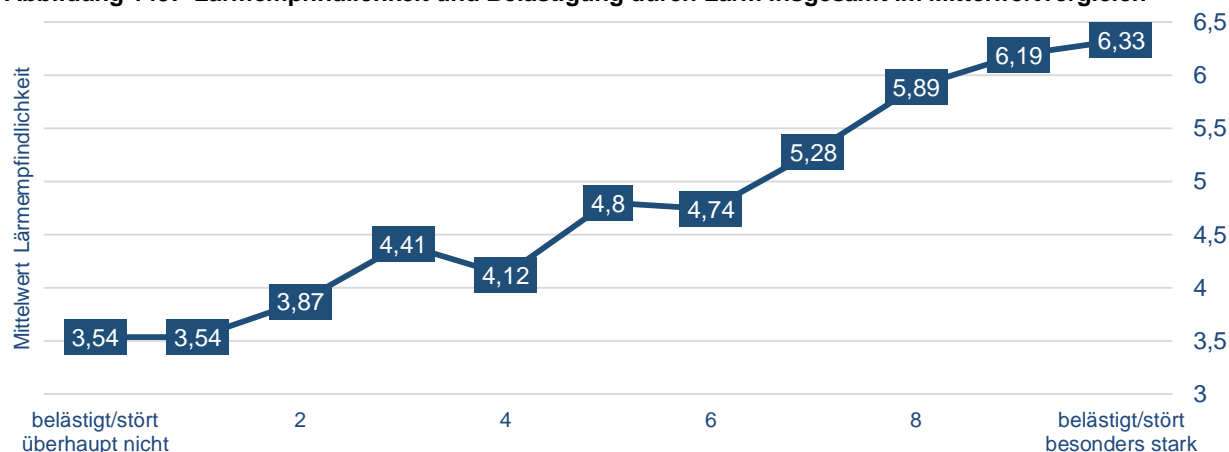

Tabelle 120: Belästigung durch Lärm insgesamt und ausgewählte Parameter (gruppiert)

|                                               |                           | Belästigung Lärm gesamt gruppiert |            |                        |            |                 |            |
|-----------------------------------------------|---------------------------|-----------------------------------|------------|------------------------|------------|-----------------|------------|
|                                               |                           | Gering belästigt                  |            | Mittelgradig belästigt |            | Stark belästigt |            |
|                                               |                           | Anzahl                            | Zeilen (%) | Anzahl                 | Zeilen (%) | Anzahl          | Zeilen (%) |
| <b>Geschlecht</b>                             | weiblich                  | 183                               | 33,8%      | 287                    | 53,0%      | 71              | 13,1%      |
|                                               | männlich                  | 195                               | 39,8%      | 241                    | 49,2%      | 54              | 11,0%      |
| <b>Altersgruppen</b>                          | 18 bis 40 Jahre           | 159                               | 36,1%      | 240                    | 54,5%      | 41              | 9,3%       |
|                                               | 41 bis 60 Jahre           | 117                               | 37,0%      | 150                    | 47,5%      | 49              | 15,5%      |
|                                               | über 60 Jahre             | 102                               | 37,1%      | 138                    | 50,2%      | 35              | 12,7%      |
| <b>Bildungsschicht</b>                        | Primärer Schulabschluss   | 40                                | 40,8%      | 43                     | 43,9%      | 15              | 15,3%      |
|                                               | Sekundärer Schulabschluss | 187                               | 34,5%      | 295                    | 54,4%      | 60              | 11,1%      |
|                                               | Tertiärer Schulabschluss  | 148                               | 38,1%      | 190                    | 49,0%      | 50              | 12,9%      |
| <b>Haushalt mit/ohne minderjährige Kinder</b> | Haushalt ohne Kinder      | 264                               | 34,6%      | 400                    | 52,5%      | 98              | 12,9%      |
|                                               | Haushalt mit Kindern      | 114                               | 42,4%      | 128                    | 47,6%      | 27              | 10,0%      |
| <b>Baulicher Schutz vor Verkehrslärm</b>      | Keiner bis geringfügig    | 256                               | 33,4%      | 399                    | 52,1%      | 111             | 14,5%      |
|                                               | Gut bis komplett          | 107                               | 45,3%      | 117                    | 49,6%      | 12              | 5,1%       |
| <b>Innenhof bzw. lärm-abgewandte Seite</b>    | Ja                        | 254                               | 36,2%      | 372                    | 53,1%      | 75              | 10,7%      |
|                                               | Nein                      | 117                               | 38,0%      | 143                    | 46,4%      | 48              | 15,6%      |
| <b>Nachtschlaf</b>                            | Fenster geöffnet/gekippt  | 329                               | 40,1%      | 410                    | 49,9%      | 82              | 10,0%      |
|                                               | Fenster geschlossen       | 45                                | 22,3%      | 115                    | 56,9%      | 42              | 20,8%      |
| <b>Wohnbedingungen</b>                        | Nicht gut                 | 30                                | 35,7%      | 39                     | 46,4%      | 15              | 17,9%      |
|                                               | Durchschnittlich          | 172                               | 31,0%      | 307                    | 55,3%      | 76              | 13,7%      |
|                                               | Sehr gut                  | 175                               | 44,9%      | 181                    | 46,4%      | 34              | 8,7%       |
| <b>Bedingungen für Kinder</b>                 | Nicht gut                 | 9                                 | 19,1%      | 23                     | 48,9%      | 15              | 31,9%      |
|                                               | Durchschnittlich          | 153                               | 29,7%      | 291                    | 56,5%      | 71              | 13,8%      |
|                                               | Sehr gut                  | 210                               | 47,0%      | 199                    | 44,5%      | 38              | 8,5%       |
| <b>Verbundenheit zu Innsbruck</b>             | Nicht verbunden           | 13                                | 23,6%      | 27                     | 49,1%      | 15              | 27,3%      |
|                                               | Durchschnittlich          | 139                               | 36,7%      | 201                    | 53,0%      | 39              | 10,3%      |
|                                               | Sehr verbunden            | 225                               | 37,8%      | 299                    | 50,3%      | 71              | 11,9%      |

|                                                                               |                         |       |       |     |       |       |       |
|-------------------------------------------------------------------------------|-------------------------|-------|-------|-----|-------|-------|-------|
| <b>Lebensbedingungen<br/>(Summenscore)</b>                                    | Nicht gut (*)           | 1     | 20,0% | 2   | 40,0% | 2     | 40,0% |
|                                                                               | Durchschnittlich        | 204   | 30,4% | 373 | 55,7% | 93    | 13,9% |
|                                                                               | Sehr gut                | 173   | 48,6% | 153 | 43,0% | 30    | 8,4%  |
| <b>Zufriedenheit eigene<br/>Wohnsituation</b>                                 | Nicht zufrieden         | 2 (*) | 7,1%  | 12  | 42,9% | 14    | 50,0% |
|                                                                               | Durchschnittlich        | 57    | 22,1% | 153 | 59,3% | 48    | 18,6% |
|                                                                               | Sehr zufrieden          | 318   | 42,7% | 363 | 48,8% | 63    | 8,5%  |
| <b>Lebensqualität</b>                                                         | Nicht gut (*)           | 1     | 10,0% | 4   | 40,0% | 5     | 50,0% |
|                                                                               | Durchschnittlich        | 65    | 22,4% | 176 | 60,7% | 49    | 16,9% |
|                                                                               | Sehr gut                | 308   | 42,5% | 346 | 47,7% | 71    | 9,8%  |
| <b>Lärmempfindlichkeit</b>                                                    | Nicht lärmempfindlich   | 159   | 57,8% | 103 | 37,5% | 13    | 4,7%  |
|                                                                               | Durchschnittlich        | 168   | 28,8% | 346 | 59,2% | 70    | 12,0% |
|                                                                               | Sehr lärmempfindlich    | 51    | 29,7% | 79  | 45,9% | 42    | 24,4% |
| <b>Summenscore</b>                                                            | Coping ausgeprägt       | 20    | 8,3%  | 147 | 60,7% | 75    | 31,0% |
| <b>Lärmcoping</b>                                                             | Coping nicht ausgeprägt | 358   | 45,4% | 381 | 48,4% | 49    | 6,2%  |
| <b>Gefühlte Zunahme</b>                                                       | Ja                      | 69    | 15,8% | 272 | 62,4% | 95    | 21,8% |
| <b>Lärmbelastung</b>                                                          | Nein                    | 309   | 51,9% | 256 | 43,0% | 30    | 5,0%  |
| <b>Gefühlte Abnahme</b>                                                       | Ja                      | 32    | 55,2% | 24  | 41,4% | 2 (*) | 3,4%  |
| <b>Lärmbelastung</b>                                                          | Nein                    | 346   | 35,6% | 504 | 51,8% | 123   | 12,6% |
| <b>Negative Gesund-<br/>heitswirkungen Lärm</b>                               | Gering                  | 100   | 46,1% | 102 | 47,0% | 15    | 6,9%  |
|                                                                               | Stark                   | 261   | 33,4% | 411 | 52,6% | 109   | 14,0% |
| <b>Lautheit Innsbruck im<br/>Vergleich zu anderen<br/>Städten Österreichs</b> | Ruhiger                 | 129   | 44,2% | 139 | 47,6% | 24    | 8,2%  |
|                                                                               | Gleich                  | 198   | 35,9% | 291 | 52,8% | 62    | 11,3% |
|                                                                               | Lauter                  | 42    | 24,1% | 95  | 54,6% | 37    | 21,3% |
| <b>Einschätzung eigener<br/>Lärmbeitrag</b>                                   | Gering                  | 296   | 38,2% | 383 | 49,4% | 96    | 12,4% |
|                                                                               | Durchschnittlich        | 70    | 30,8% | 134 | 59,0% | 23    | 10,1% |
|                                                                               | Groß                    | 12    | 41,4% | 11  | 37,9% | 6     | 20,7% |
| <b>Notwendigkeit (weite-<br/>rer) Maßnahmen Lärm</b>                          | Maßnahmen notwendig     | 200   | 28,9% | 383 | 55,4% | 108   | 15,6% |
|                                                                               | Keine Maßnahmen nötig   | 107   | 55,7% | 73  | 38,0% | 12    | 6,3%  |

(\*) zu kleine Fallzahlen für solide Auswertungen

Befragte, die sich insgesamt stark lärmbelästigt fühlen (das gilt auch für die anderen Lärmbelästigungsquellen), schätzen ihren eigenen Beitrag zur Gesamtlärmsituation in Innsbruck höher ein, als sich weniger stark belästigt führende Befragte.

Eine gewisse Auffälligkeit stellen diejenigen Befragten<sup>12</sup> dar, die in der höchsten Antwortkategorie 10 (=belästigt / stört besonders stark) antworten. Diese Personen zeigen – auch in den anderen Belästigungsauswertungen unabhängig von der Lärmquelle und in Zusammenschau mit anderen Items – eine starke Tendenz zu negativeren Beurteilungen als die restlichen Befragten. – Die psychologische Disposition ist bei sämtlichen Auswertungen als wesentliche Komponente mitzudenken.

<sup>12</sup> Für das Item *Belästigung durch Lärm insgesamt* handelt es sich dabei um 36 befragte Personen.



### 3. Belästigung durch Flugverkehrslärm

Der Fluglärm löst im befragten Kollektiv knapp vor dem Straßenverkehrslärm die stärkste Belästigungsreaktion aus. 11,7% ordnen sich der Gruppe der Starkbelästigten zu, 39% antworten in den mittleren Belästigungskategorien und knapp die Hälfte aller befragten Innsbruckerinnen und Innsbrucker schätzen sich als gering vom Fluglärm belästigt ein.

Im Mittel liegen die Antworten der Befragten bei 3,16 (34,8%):

**Abbildung 150: Belästigung durch Flugverkehrslärm in Prozent**

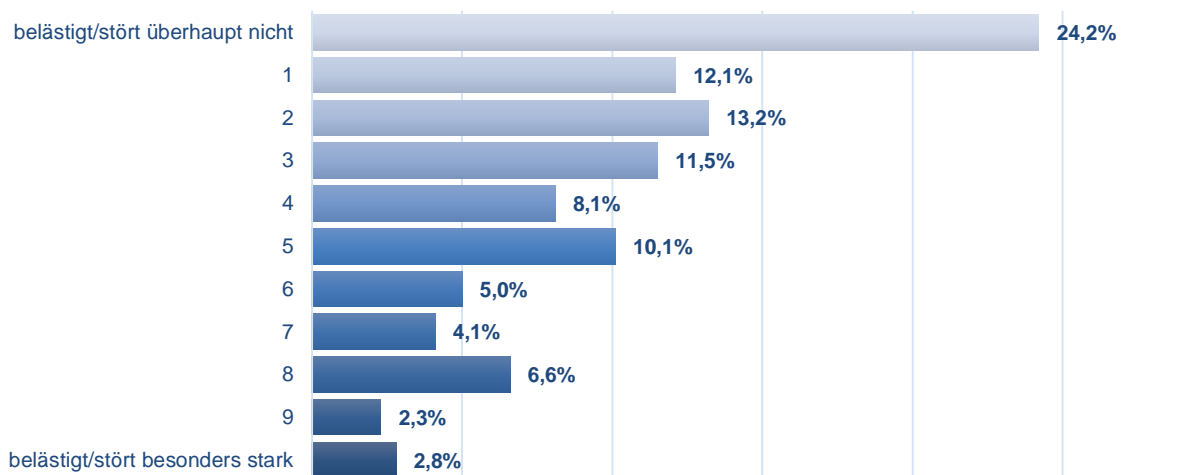

**Tabelle 121: Belästigung durch Fluglärm gruppiert**

|                        | Häufigkeit | Gültige Prozente | Kumulierte Prozente |
|------------------------|------------|------------------|---------------------|
| Gering belästigt       | 510        | 49,5             | 49,5                |
| Mittelgradig belästigt | 400        | 38,8             | 88,3                |
| Stark belästigt        | 121        | 11,7             | 100,0               |
| Gesamt                 | 1031       | 100,0            |                     |

#### 3.1. Fluglärmbelästigung, -Belastung und -Expositionsempfinden

Die Belästigung durch Flugverkehrslärm korrespondiert sehr ausgeprägt mit der tatsächlich gegebenen Fluglärmbelastung und zeigt mit steigender gegebener Belastung ein stark ansteigendes Belästigungsmaß.

Das Expositionsempfinden gegenüber Fluglärm liegt dabei insgesamt höher als das Belästigungsempfinden und steigt besonders bei hohen vorhandenen Fluglärmbelastungen stärker und linearer an:

**Abbildung 151: Fluglärmbelästigung, –Expositionsempfinden und 24h-Fluglärmbelastung  $L_{den}$  in 10dB-Schritten im Mittelwertvergleich**

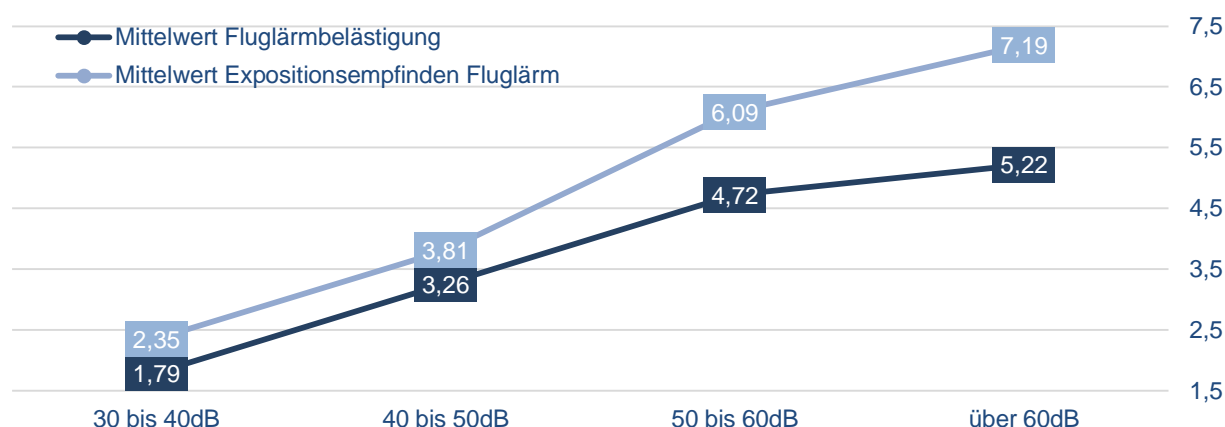

Anm.: Die Darstellung zeigt nachvollziehbare Zusammenhänge auf, enthält jedoch keine Prüfungen auf Kovariablen und andere Prädiktoren und ist somit nicht den Dosis-Wirkungskurven aus der gängigen Fachliteratur gleichzusetzen.

### 3.2. Fluglärmbelästigung und Katastralgemeinden

Entsprechend der gegebenen Fluglärmbelastung zeigt sich das mit Abstand stärkste Fluglärmbelästigungsempfinden in Hötting. Die geringste Störung durch Fluglärm im eigenen Wohnumfeld nehmen die Befragten in Igls wahr:

**Abbildung 152: Fluglärmbelästigung und Katastralgemeinden im Mittelwertvergleich**

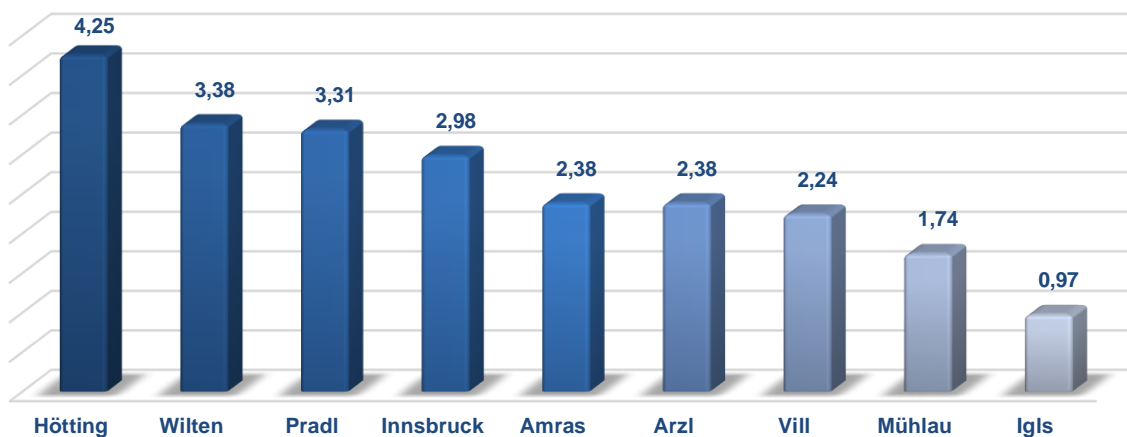

### 3.3. Fluglärmbelästigung und ausgewählte Parameter

Die Unterschiede zwischen einzelnen Subgruppen bezogen auf demographische Merkmale sind für das Ausmaß der Belästigung durch Fluglärm vergleichsweise gering ausgeprägt. Baulicher Lärmschutz, lärmabgewandte Seiten der Wohnungen oder Innenhöfe spielen für die Belästigung durch Fluglärm mit Ausnahme der flughafennahen Befragten ebenso keine größere Rolle.

Für die subjektiven Parameter der Einschätzung der eigenen Wohn- und Lebensbedingungen, sowie die verschiedenen Fragen zur Beurteilungen des Lärms in Innsbruck, zeigt sich ein sehr vergleichbares Bild zu den Bezügen zur Belästigung durch Lärm insgesamt:

**Abbildung 153: Wohnbedingungen und Belästigung durch Fluglärm im Extremgruppenvergleich**

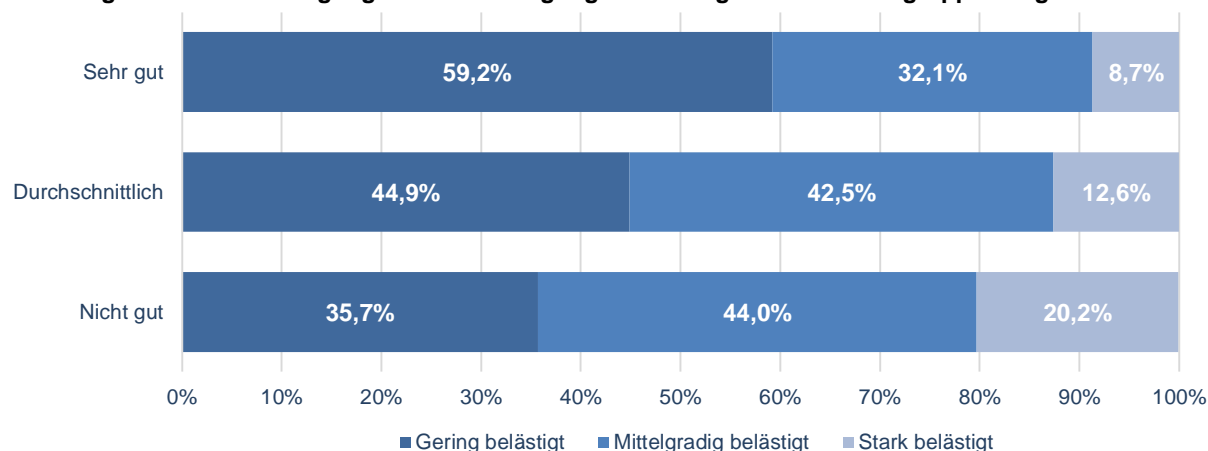

Eine starke Beziehung des Belästigungsausmaßes durch Flugverkehrslärm besteht wiederum zur Lärmempfindlichkeit:

**Abbildung 154: Lärmempfindlichkeit und Belästigung durch Fluglärm im Mittelwertvergleich**

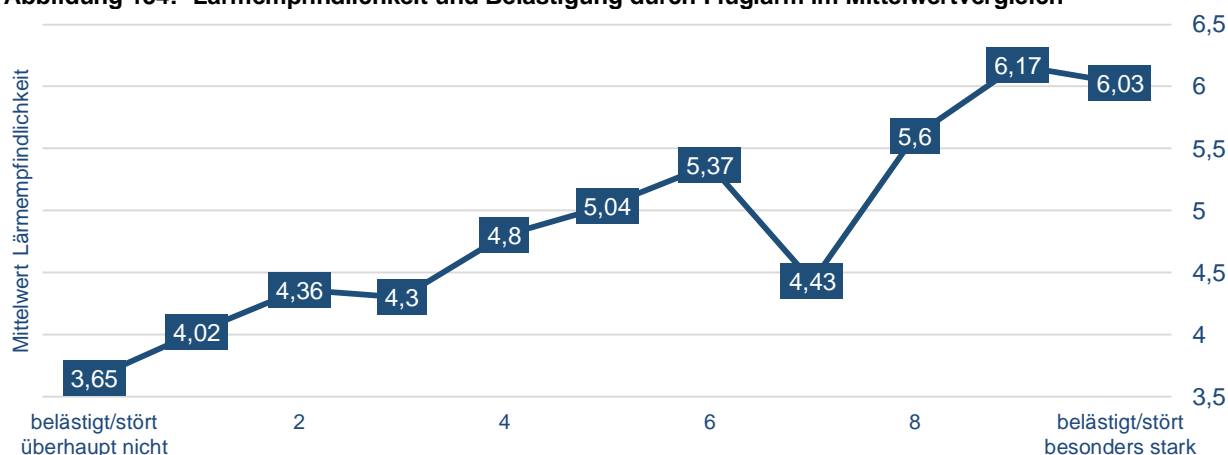

**Tabelle 122: Belästigung durch Fluglärm und ausgewählte Parameter (gruppiert)**

|                        |                           | Belästigung Fluglärm gruppiert |            |                        |            |                 |            |
|------------------------|---------------------------|--------------------------------|------------|------------------------|------------|-----------------|------------|
|                        |                           | Gering belästigt               |            | Mittelgradig belästigt |            | Stark belästigt |            |
|                        |                           | Anzahl                         | Zeilen (%) | Anzahl                 | Zeilen (%) | Anzahl          | Zeilen (%) |
| <b>Geschlecht</b>      | weiblich                  | 261                            | 48,2%      | 219                    | 40,5%      | 61              | 11,3%      |
|                        | männlich                  | 249                            | 50,8%      | 181                    | 36,9%      | 60              | 12,2%      |
| <b>Altersgruppen</b>   | 18 bis 40 Jahre           | 227                            | 51,6%      | 170                    | 38,6%      | 43              | 9,8%       |
|                        | 41 bis 60 Jahre           | 147                            | 46,5%      | 132                    | 41,8%      | 37              | 11,7%      |
|                        | über 60 Jahre             | 136                            | 49,5%      | 98                     | 35,6%      | 41              | 14,9%      |
| <b>Bildungsschicht</b> | Primärer Schulabschluss   | 54                             | 55,1%      | 32                     | 32,7%      | 12              | 12,2%      |
|                        | Sekundärer Schulabschluss | 267                            | 49,3%      | 218                    | 40,2%      | 57              | 10,5%      |

|                                                                       |                          |     |       |     |       |       |       |
|-----------------------------------------------------------------------|--------------------------|-----|-------|-----|-------|-------|-------|
|                                                                       | Tertiärer Schulabschluss | 188 | 48,5% | 148 | 38,1% | 52    | 13,4% |
| <b>Haushalt mit/ohne minderjährige Kinder</b>                         | Haushalt ohne Kinder     | 368 | 48,3% | 300 | 39,4% | 94    | 12,3% |
|                                                                       | Haushalt mit Kindern     | 142 | 52,8% | 100 | 37,2% | 27    | 10,0% |
| <b>Baulicher Schutz vor Verkehrslärm</b>                              | Keiner bis geringfügig   | 376 | 49,1% | 294 | 38,4% | 96    | 12,5% |
|                                                                       | Gut bis komplett         | 116 | 49,2% | 96  | 40,7% | 24    | 10,2% |
| <b>Innenhof bzw. lärm-abgewandte Seite</b>                            | Ja                       | 355 | 50,6% | 285 | 40,7% | 61    | 8,7%  |
|                                                                       | Nein                     | 145 | 47,1% | 107 | 34,7% | 56    | 18,2% |
| <b>Nachtschlaf</b>                                                    | Fenster geöffnet/gekippt | 414 | 50,4% | 315 | 38,4% | 92    | 11,2% |
|                                                                       | Fenster geschlossen      | 91  | 45,0% | 84  | 41,6% | 27    | 13,4% |
| <b>Wohnbedingungen</b>                                                | Nicht gut                | 30  | 35,7% | 37  | 44,0% | 17    | 20,2% |
|                                                                       | Durchschnittlich         | 249 | 44,9% | 236 | 42,5% | 70    | 12,6% |
|                                                                       | Sehr gut                 | 231 | 59,2% | 125 | 32,1% | 34    | 8,7%  |
| <b>Bedingungen für Kinder</b>                                         | Nicht gut                | 20  | 42,6% | 19  | 40,4% | 8     | 17,0% |
|                                                                       | Durchschnittlich         | 227 | 44,1% | 219 | 42,5% | 69    | 13,4% |
|                                                                       | Sehr gut                 | 254 | 56,8% | 155 | 34,7% | 38    | 8,5%  |
| <b>Verbundenheit zu Innsbruck</b>                                     | Nicht verbunden          | 24  | 43,6% | 20  | 36,4% | 11    | 20,0% |
|                                                                       | Durchschnittlich         | 179 | 47,2% | 157 | 41,4% | 43    | 11,3% |
|                                                                       | Sehr verbunden           | 306 | 51,4% | 222 | 37,3% | 67    | 11,3% |
| <b>Zufriedenheit eigene Wohnsituation</b>                             | Nicht zufrieden          | 14  | 50,0% | 8   | 28,6% | 6     | 21,4% |
|                                                                       | Durchschnittlich         | 104 | 40,3% | 119 | 46,1% | 35    | 13,6% |
|                                                                       | Sehr zufrieden           | 391 | 52,6% | 273 | 36,7% | 80    | 10,8% |
| <b>Lebensbedingungen (Summenscore)</b>                                | Nicht gut (*)            | 2   | 40,0% | 2   | 40,0% | 1     | 20,0% |
|                                                                       | Durchschnittlich         | 290 | 43,3% | 285 | 42,5% | 95    | 14,2% |
|                                                                       | Sehr gut                 | 218 | 61,2% | 113 | 31,7% | 25    | 7,0%  |
| <b>Lebensqualität</b>                                                 | Nicht gut (*)            | 2   | 20,0% | 4   | 40,0% | 4     | 40,0% |
|                                                                       | Durchschnittlich         | 131 | 45,2% | 113 | 39,0% | 46    | 15,9% |
|                                                                       | Sehr gut                 | 374 | 51,6% | 281 | 38,8% | 70    | 9,7%  |
| <b>Lärmempfindlichkeit</b>                                            | Nicht lärmempfindlich    | 179 | 65,1% | 82  | 29,8% | 14    | 5,1%  |
|                                                                       | Durchschnittlich         | 267 | 45,7% | 245 | 42,0% | 72    | 12,3% |
|                                                                       | Sehr lärmempfindlich     | 64  | 37,2% | 73  | 42,4% | 35    | 20,3% |
| <b>Summenscore Lärmcoping</b>                                         | Coping ausgeprägt        | 82  | 33,9% | 98  | 40,5% | 62    | 25,6% |
|                                                                       | Coping nicht ausgeprägt  | 428 | 54,3% | 301 | 38,2% | 59    | 7,5%  |
| <b>Gefühlte Zunahme Lärmbelastung</b>                                 | Ja                       | 162 | 37,2% | 191 | 43,8% | 83    | 19,0% |
|                                                                       | Nein                     | 348 | 58,5% | 209 | 35,1% | 38    | 6,4%  |
| <b>Gefühlte Abnahme Lärmbelastung</b>                                 | Ja                       | 36  | 62,1% | 20  | 34,5% | 2 (*) | 3,4%  |
|                                                                       | Nein                     | 474 | 48,7% | 380 | 39,1% | 119   | 12,2% |
| <b>Notwendigkeit (weiterer) Maßnahmen Lärm</b>                        | Maßnahmen notwendig      | 291 | 42,1% | 294 | 42,5% | 106   | 15,3% |
|                                                                       | Keine Maßnahmen nötig    | 123 | 64,1% | 60  | 31,3% | 9     | 4,7%  |
| <b>Negative Gesundheitswirkungen Lärm</b>                             | Gering                   | 126 | 58,1% | 78  | 35,9% | 13    | 6,0%  |
|                                                                       | Stark                    | 364 | 46,6% | 316 | 40,5% | 101   | 12,9% |
| <b>Lautheit Innsbruck im Vergleich zu anderen Städten Österreichs</b> | Ruhiger                  | 150 | 51,4% | 114 | 39,0% | 28    | 9,6%  |
|                                                                       | Gleich                   | 285 | 51,7% | 206 | 37,4% | 60    | 10,9% |
|                                                                       | Lauter                   | 67  | 38,5% | 74  | 42,5% | 33    | 19,0% |

|                                         |                  |     |       |     |       |    |       |
|-----------------------------------------|------------------|-----|-------|-----|-------|----|-------|
| <b>Einschätzung eigener Lärmbeitrag</b> | Gering           | 395 | 51,0% | 292 | 37,7% | 88 | 11,4% |
|                                         | Durchschnittlich | 100 | 44,1% | 100 | 44,1% | 27 | 11,9% |
|                                         | Groß             | 15  | 51,7% | 8   | 27,6% | 6  | 20,7% |

(\*) zu kleine Fallzahlen für solide Auswertungen

## 4. Belästigung durch Straßenverkehrslärm

Die Belästigung durch Straßenverkehrslärm fällt in ihrem Ausmaß sehr ähnlich derjenigen auf Fluglärm aus und fällt in ihren Ausprägungen, auch in Belastungsgruppen kategorisiert, nur sehr geringfügig hinter den Flugverkehrslärm zurück. Die Anzahl an Personen, die mit der höchstmöglichen Kategorie 10 (=belästigt / stört besonders stark) antwortete, ist mit 3,5% sogar etwas höher als beim Fluglärm. Mehr als die Hälfte aller Befragten schätzt sich selbst als nur gering vom Straßenverkehrslärm gestört ein. Ähnlich wie beim Flugverkehrslärm fühlt sich jede(r) 9. Befragte stark vom Straßenverkehrslärm belästigt:

**Abbildung 155: Belästigung durch Strassenverkehrslärm in Prozent**

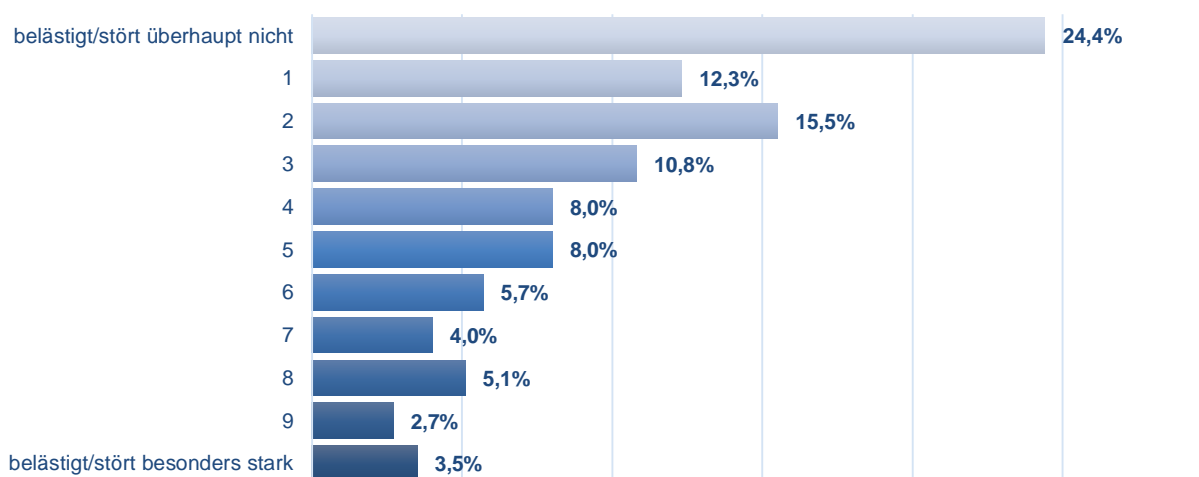

Im Mittel liegen die Antworten der befragten Innsbruckerinnen und Innsbrucker bei 3,1 (34,1%).

**Tabelle 123: Belästigung durch Straßenverkehrslärm gruppiert**

|                        | Häufigkeit | Gültige Prozente | Kumulierte Prozente |
|------------------------|------------|------------------|---------------------|
| Gering belästigt       | 539        | 52,3             | 52,3                |
| Mittelgradig belästigt | 375        | 36,4             | 88,7                |
| Stark belästigt        | 117        | 11,3             | 100,0               |
| Gesamt                 | 1031       | 100,0            |                     |

#### 4.1. Straßenlärmbelästigung, -Belastung und -Expositionsempfinden

Auch in der Zusammenschau der Belästigung durch Straßenverkehrslärm mit der gegebenen Straßenverkehrslärmbelastung zeigt sich ein deutlicher Zusammenhang. Wie schon beim Fluglärm liegt das Ausmaß der empfundenen Störung durch den Straßenverkehrslärm etwas unterhalb der empfundenen Ausgesetzttheit.

Im Unterschied zur Belästigung durch Fluglärm steigt das Belästigungsausmaß in Bezug zum Straßenverkehrslärm erst bei höheren gegebenen Lärmpegeln über 50dB  $L_{den}$  stark an:

**Abbildung 156: Straßenlärmbelästigung und –Expositionsempfinden und 24h-Straßenlärmbelastung  $L_{den}$  in 10dB-Schritten im Mittelwertvergleich**

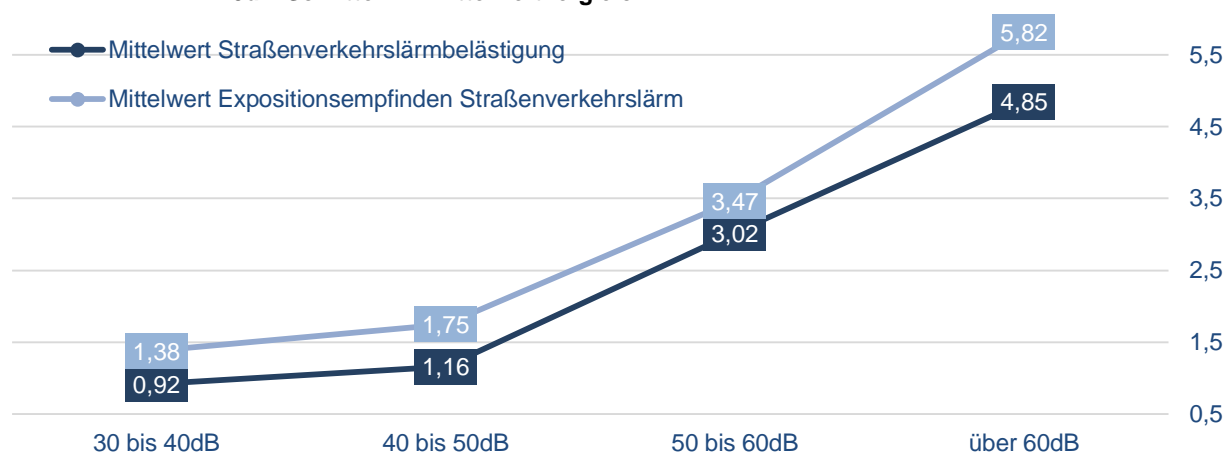

Anm.: Die Darstellung zeigt nachvollziehbare Zusammenhänge auf, enthält jedoch keine Prüfungen auf Kovariablen und andere Prädiktoren und ist somit nicht den Dosis-Wirkungskurven aus der gängigen Fachliteratur gleichzusetzen.

#### 4.2. Straßenlärmbelästigung und Katastralgemeinden

Das größte Ausmaß an Belästigung durch Straßenverkehrslärm wird in Wilten empfunden, gefolgt von Pradl, Innsbruck und AmraS. Die geringste Störung durch Straßenverkehrslärm im eigenen Wohnumfeld empfinden die Befragten in Igls, Mühlau und Vill:

**Abbildung 157: Straßenlärmbelästigung und Katastralgemeinden im Mittelwertvergleich**

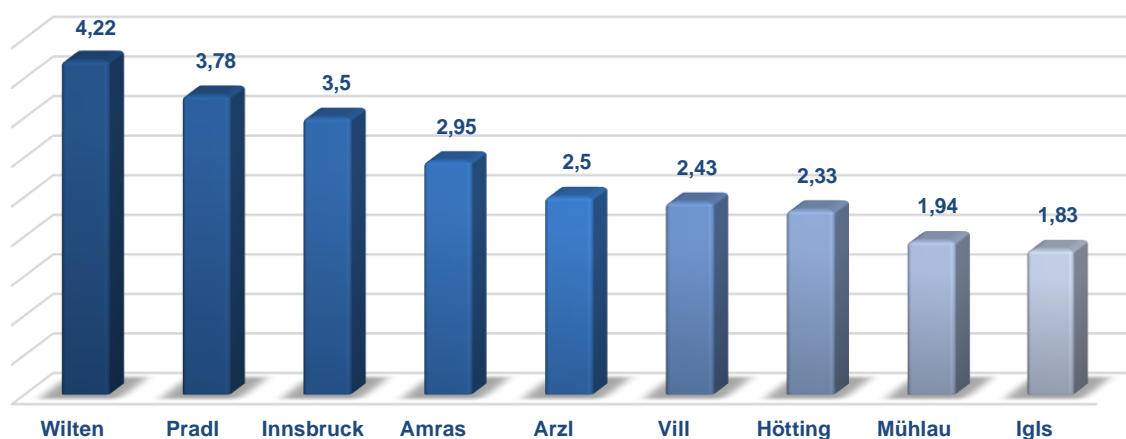

### 4.3. Straßenverkehrslärmbelästigung und ausgewählte Parameter

Ältere und befragte Innsbruckerinnen und Innsbrucker unter 40 Jahren empfinden sich weniger vom Straßenverkehrslärm belästigt als die mittlere Altersgruppe der 41- bis 60-Jährigen.

Frauen geben an, sich deutlich stärker vom Straßenverkehrslärm gestört zu fühlen als Männer:

**Tabelle 124: Geschlecht und Belästigung durch Straßenverkehrslärm gruppiert**

|            |          |         | Belästigung Straßenverkehrslärm |                        |                 | Gesamt |
|------------|----------|---------|---------------------------------|------------------------|-----------------|--------|
|            |          |         | Gering belästigt                | Mittelgradig belästigt | Stark belästigt |        |
| Geschlecht | weiblich | Anzahl  | 263                             | 207                    | 71              | 541    |
|            |          | Prozent | 48,6%                           | 38,3%                  | 13,1%           | 100,0% |
|            | männlich | Anzahl  | 276                             | 168                    | 46              | 490    |
|            |          | Prozent | 56,3%                           | 34,3%                  | 9,4%            | 100,0% |
| Gesamt     |          | Anzahl  | 539                             | 375                    | 117             | 1031   |
|            |          | Prozent | 52,3%                           | 36,4%                  | 11,3%           | 100,0% |

Durch bauliche Abschirmungen (Gebäude, Mauern etc.) vor Verkehrslärm geschützte Personen, sind deutlich weniger vom Straßenverkehrslärm belästigt als ungeschützte:

**Abbildung 158: Belästigung durch Straßenverkehrslärm und baulicher Schutz vor Verkehrslärm im Extremgruppenvergleich in Prozent**

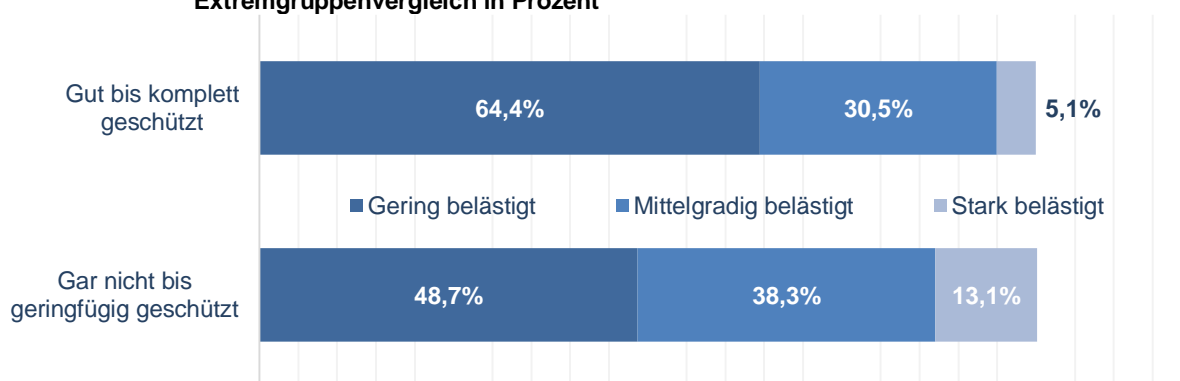

Die meisten der untersuchten Parameter unterscheiden sich nicht stark von Belästigungsauswertungen in Zusammenschau mit anderen Lärmquellen. So auch die Einschätzung der Güte der persönlichen Wohn- und Lebensbedingungen (in der folgenden Grafik als Summenscore dargestellt), welche bei zunehmender Straßenverkehrslärmbelästigung sinkt:

**Abbildung 159: Lebensbedingungen (Summenscore) und Belästigung durch Straßenverkehrslärm im Mittelwertvergleich**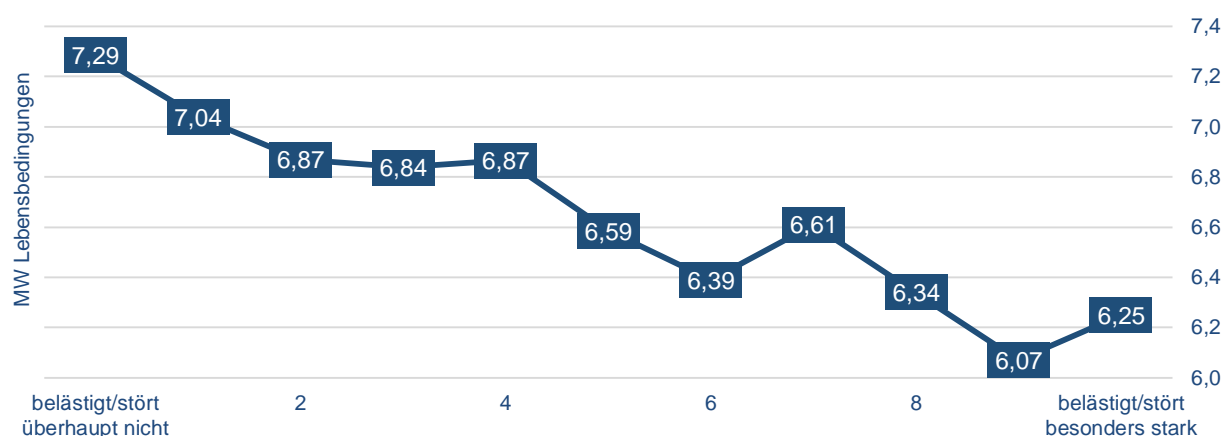**Tabelle 125: Belästigung durch Straßenverkehrslärm und ausgewählte Parameter (gruppiert)**

|                                               |                           | Belästigung Straßenverkehrslärm |            |                        |            |                 |            |
|-----------------------------------------------|---------------------------|---------------------------------|------------|------------------------|------------|-----------------|------------|
|                                               |                           | Gering belästigt                |            | Mittelgradig belästigt |            | Stark belästigt |            |
|                                               |                           | Anzahl                          | Zeilen (%) | Anzahl                 | Zeilen (%) | Anzahl          | Zeilen (%) |
| <b>Geschlecht</b>                             | weiblich                  | 263                             | 48,6%      | 207                    | 38,3%      | 71              | 13,1%      |
|                                               | männlich                  | 276                             | 56,3%      | 168                    | 34,3%      | 46              | 9,4%       |
| <b>Altersgruppen</b>                          | 18 bis 40 Jahre           | 237                             | 53,9%      | 161                    | 36,6%      | 42              | 9,5%       |
|                                               | 41 bis 60 Jahre           | 164                             | 51,9%      | 107                    | 33,9%      | 45              | 14,2%      |
|                                               | über 60 Jahre             | 138                             | 50,2%      | 107                    | 38,9%      | 30              | 10,9%      |
| <b>Bildungsschicht</b>                        | Primärer Schulabschluss   | 52                              | 53,1%      | 33                     | 33,7%      | 13              | 13,3%      |
|                                               | Sekundärer Schulabschluss | 270                             | 49,8%      | 211                    | 38,9%      | 61              | 11,3%      |
|                                               | Tertiärer Schulabschluss  | 214                             | 55,2%      | 131                    | 33,8%      | 43              | 11,1%      |
| <b>Haushalt mit/ohne minderjährige Kinder</b> | Haushalt ohne Kinder      | 393                             | 51,6%      | 280                    | 36,7%      | 89              | 11,7%      |
|                                               | Haushalt mit Kindern      | 146                             | 54,3%      | 95                     | 35,3%      | 28              | 10,4%      |
| <b>Baulicher Schutz vor Verkehrslärm</b>      | Keiner bis geringfügig    | 373                             | 48,7%      | 293                    | 38,3%      | 100             | 13,1%      |
|                                               | Gut bis komplett          | 152                             | 64,4%      | 72                     | 30,5%      | 12              | 5,1%       |
| <b>Innenhof bzw. lärm-abgewandte Seite</b>    | Ja                        | 368                             | 52,5%      | 265                    | 37,8%      | 68              | 9,7%       |
|                                               | Nein                      | 162                             | 52,6%      | 99                     | 32,1%      | 47              | 15,3%      |
| <b>Nachtschlaf</b>                            | Fenster geöffnet/gekippt  | 462                             | 56,3%      | 295                    | 35,9%      | 64              | 7,8%       |
|                                               | Fenster geschlossen       | 74                              | 36,6%      | 77                     | 38,1%      | 51              | 25,2%      |
| <b>Wohnbedingungen</b>                        | Nicht gut                 | 38                              | 45,2%      | 27                     | 32,1%      | 19              | 22,6%      |
|                                               | Durchschnittlich          | 266                             | 47,9%      | 218                    | 39,3%      | 71              | 12,8%      |
|                                               | Sehr gut                  | 234                             | 60,0%      | 129                    | 33,1%      | 27              | 6,9%       |
| <b>Bedingungen für Kinder</b>                 | Nicht gut                 | 15                              | 31,9%      | 19                     | 40,4%      | 13              | 27,7%      |
|                                               | Durchschnittlich          | 238                             | 46,2%      | 201                    | 39,0%      | 76              | 14,8%      |
|                                               | Sehr gut                  | 273                             | 61,1%      | 148                    | 33,1%      | 26              | 5,8%       |
| <b>Verbundenheit zu Innsbruck</b>             | Nicht verbunden           | 21                              | 38,2%      | 20                     | 36,4%      | 14              | 25,5%      |
|                                               | Durchschnittlich          | 214                             | 56,5%      | 130                    | 34,3%      | 35              | 9,2%       |
|                                               | Sehr verbunden            | 303                             | 50,9%      | 224                    | 37,6%      | 68              | 11,4%      |



|                                                                       |                         |     |       |     |       |       |       |
|-----------------------------------------------------------------------|-------------------------|-----|-------|-----|-------|-------|-------|
| <b>Zufriedenheit eigene Wohnsituation</b>                             | Nicht zufrieden         | 13  | 46,4% | 6   | 21,4% | 9     | 32,1% |
|                                                                       | Durchschnittlich        | 96  | 37,2% | 111 | 43,0% | 51    | 19,8% |
|                                                                       | Sehr zufrieden          | 430 | 57,8% | 257 | 34,5% | 57    | 7,7%  |
| <b>Lebensbedingungen (Summenscore)</b>                                | Nicht gut (*)           | 1   | 20,0% | 3   | 60,0% | 1     | 20,0% |
|                                                                       | Durchschnittlich        | 316 | 47,2% | 261 | 39,0% | 93    | 13,9% |
|                                                                       | Sehr gut                | 222 | 62,4% | 111 | 31,2% | 23    | 6,5%  |
| <b>Lebensqualität</b>                                                 | Nicht gut (*)           | 5   | 50,0% | 1   | 10,0% | 4     | 40,0% |
|                                                                       | Durchschnittlich        | 121 | 41,7% | 125 | 43,1% | 44    | 15,2% |
|                                                                       | Sehr gut                | 408 | 56,3% | 249 | 34,3% | 68    | 9,4%  |
| <b>Lärmempfindlichkeit</b>                                            | Nicht lärmempfindlich   | 177 | 64,4% | 85  | 30,9% | 13    | 4,7%  |
|                                                                       | Durchschnittlich        | 274 | 46,9% | 234 | 40,1% | 76    | 13,0% |
|                                                                       | Sehr lärmempfindlich    | 88  | 51,2% | 56  | 32,6% | 28    | 16,3% |
| <b>Summenscore</b>                                                    | Coping ausgeprägt       | 73  | 30,2% | 101 | 41,7% | 68    | 28,1% |
| <b>Lärmcoping</b>                                                     | Coping nicht ausgeprägt | 466 | 59,1% | 274 | 34,8% | 48    | 6,1%  |
| <b>Gefühlte Zunahme Lärmbelastung</b>                                 | Ja                      | 155 | 35,6% | 197 | 45,2% | 84    | 19,3% |
| <b>Gefühlte Abnahme Lärmbelastung</b>                                 | Nein                    | 384 | 64,5% | 178 | 29,9% | 33    | 5,5%  |
| <b>Notwendigkeit (weiterer) Maßnahmen Lärm</b>                        | Ja                      | 37  | 63,8% | 17  | 29,3% | 4 (*) | 6,9%  |
| <b>Negative Gesundheitswirkungen Lärm</b>                             | Nein                    | 502 | 51,6% | 358 | 36,8% | 113   | 11,6% |
| <b>Lautheit Innsbruck im Vergleich zu anderen Städten Österreichs</b> | Maßnahmen notwendig     | 322 | 46,6% | 268 | 38,8% | 101   | 14,6% |
|                                                                       | Keine Maßnahmen nötig   | 132 | 68,8% | 50  | 26,0% | 10    | 5,2%  |
| <b>Einschätzung eigener Lärmbeitrag</b>                               | Gering                  | 130 | 59,9% | 70  | 32,3% | 17    | 7,8%  |
|                                                                       | Stark                   | 392 | 50,2% | 291 | 37,3% | 98    | 12,5% |
| <b>Lärmbeitrag</b>                                                    | Ruhiger                 | 187 | 64,0% | 83  | 28,4% | 22    | 7,5%  |
|                                                                       | Gleich                  | 280 | 50,8% | 208 | 37,7% | 63    | 11,4% |
|                                                                       | Lauter                  | 63  | 36,2% | 79  | 45,4% | 32    | 18,4% |
| <b>Einschätzung eigener Lärmbeitrag</b>                               | Gering                  | 411 | 53,0% | 273 | 35,2% | 91    | 11,7% |
|                                                                       | Durchschnittlich        | 114 | 50,2% | 95  | 41,9% | 18    | 7,9%  |
|                                                                       | Groß                    | 14  | 48,3% | 7   | 24,1% | 8     | 27,6% |

(\*) zu kleine Fallzahlen für solide Auswertungen

## 5. Belästigung durch Baustellenlärm

Wie schon bei der Einschätzung der Lärmexposition der eigenen Wohnung / des eigenen Hauses fällt die Belästigungsreaktion durch Baustellenlärm und die folgenden Belästigungsreaktionen deutlich anders aus, als Störungswahrnehmung durch Flug- und Straßenverkehrslärm. Fast die Hälfte aller befragten Innsbruckerinnen und Innsbrucker *stört* der Baustellenlärm in der Stadt *überhaupt nicht* und fast zwei Drittel (65%) aller Probandinnen und Probanden sehen sich selbst als nur gering vom Baustellenlärm belästigt an (gruppierte Antwortkategorien 0 [=belästigt / stört überhaupt nicht], 1 und 2). Über 9% sehen sich hingegen als stark belästigt (*highly annoyed*: gruppierte Antwortkategorien 8, 9 und 10 [=belästigt / stört besonders stark]) und rund ein Viertel der Befragten (25,6%) antwortet in den mittleren Kategorien. Eine Person macht zu dieser Frage keine Angaben:

**Abbildung 160: Belästigung durch Baustellenlärm in Prozent**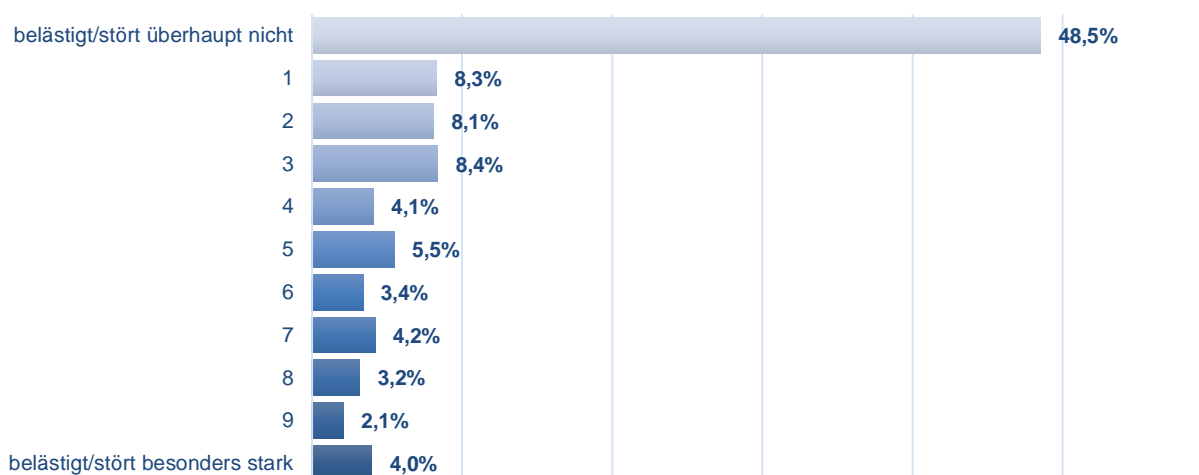

Im Mittel liegen die Antworten der befragten Probandinnen und Probanden bei 2,28 (25,1%) und damit im Mittelwert um knapp eine Ausprägung auf der 11-teiligen Antwortskala hinter der Belästigungsreaktion auf Flug- und Straßenverkehrslärm.

**Tabelle 126: Belästigung durch Baustellenlärm gruppiert**

|                        | Häufigkeit | Gültige Prozente | Kumulierte Prozente |
|------------------------|------------|------------------|---------------------|
| Gering belästigt       | 670        | 65,0             | 65,0                |
| Mittelgradig belästigt | 264        | 25,6             | 90,6                |
| Gültig Stark belästigt | 96         | 9,3              | 99,9                |
| w.n. / k.A.            | 1          | ,1               | 100,0               |
| Gesamt                 | 1031       | 100,0            |                     |

### 5.1. Baulärmbelästigung und Katastralgemeinden

Die Befragten in Pradl geben gemittelt das größte Ausmaß an Belästigung durch Baustellenlärm an, die befragten Innsbruckerinnen und Innsbrucker in Vill das mit Abstand niedrigste:

**Abbildung 161: Belästigung durch Baustellenlärm und Katastralgemeinden im Mittelwertvergleich**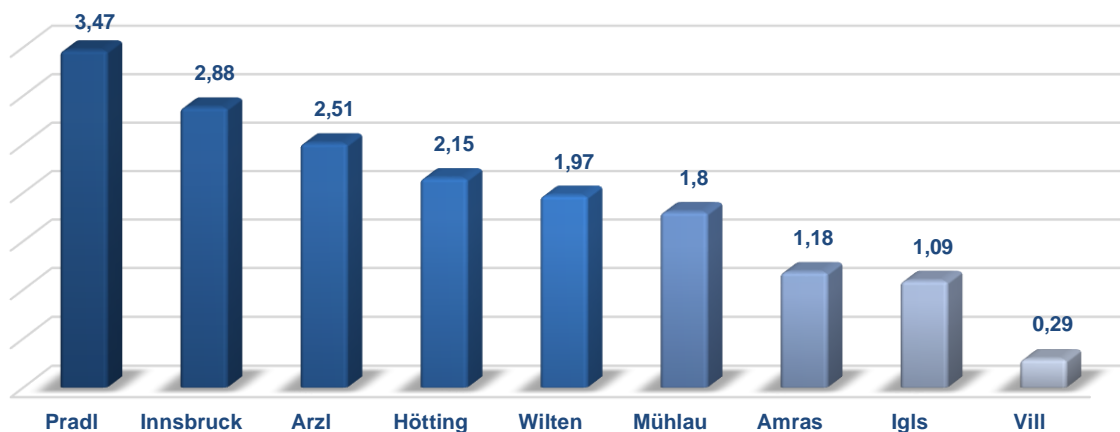

Anmerkung: Baustellenlärm ist stark auf Akutbelastungen bezogen und daher ist ein Vergleich der Katastralgemeinden zu einem sehr erheblichen Anteil nur eine Momentaufnahme.

## 5.2. Baulärmbelästigung und ausgewählte Parameter

Die Belästigung ausgehend von Baustellenlärm ist zum einen häufig ein zeitlich begrenztes Ärgernis und zum anderen zumindest teilweise unabhängig von anderen Wohn- und Lebensbedingungen. Das spiegelt sich auch in den Beantwortungen der einzelnen Befragten wieder. Die Unterschiede zwischen einzelnen Subgruppen fallen zum Teil vergleichsweise kleiner aus und streuen stärker.

Im Folgenden einige ausgewählte Parameter, jeweils in Extremgruppen zusammengefasst, in Zusammenschau mit der Belästigung durch Baulärm:

**Tabelle 127: Belästigung durch Baustellenlärm und ausgewählte Parameter (gruppiert)**

|                                               |                          | Belästigung Baustellenlärm gruppiert |            |                        |            |                 |            |
|-----------------------------------------------|--------------------------|--------------------------------------|------------|------------------------|------------|-----------------|------------|
|                                               |                          | Gering belästigt                     |            | Mittelgradig belästigt |            | Stark belästigt |            |
|                                               |                          | Anzahl                               | Zeilen (%) | Anzahl                 | Zeilen (%) | Anzahl          | Zeilen (%) |
| <b>Geschlecht</b>                             | weiblich                 | 330                                  | 61,0%      | 150                    | 27,7%      | 61              | 11,3%      |
|                                               | männlich                 | 340                                  | 69,5%      | 114                    | 23,3%      | 35              | 7,2%       |
| <b>Altersgruppen</b>                          | 18 bis 40 Jahre          | 275                                  | 62,6%      | 125                    | 28,5%      | 39              | 8,9%       |
|                                               | 41 bis 60 Jahre          | 200                                  | 63,3%      | 84                     | 26,6%      | 32              | 10,1%      |
|                                               | über 60 Jahre            | 195                                  | 70,9%      | 55                     | 20,0%      | 25              | 9,1%       |
| <b>Haushalt mit/ohne minderjährige Kinder</b> | Haushalt ohne Kinder     | 501                                  | 65,8%      | 190                    | 25,0%      | 70              | 9,2%       |
|                                               | Haushalt mit Kindern     | 169                                  | 62,8%      | 74                     | 27,5%      | 26              | 9,7%       |
| <b>Baulicher Schutz vor Verkehrslärm</b>      | Keiner bis geringfügig   | 491                                  | 64,2%      | 195                    | 25,5%      | 79              | 10,3%      |
|                                               | Gut bis komplett         | 158                                  | 66,9%      | 64                     | 27,1%      | 14              | 5,9%       |
| <b>Innenhof bzw. lärm-abgewandte Seite</b>    | Ja                       | 454                                  | 64,8%      | 188                    | 26,8%      | 59              | 8,4%       |
|                                               | Nein                     | 201                                  | 65,5%      | 70                     | 22,8%      | 36              | 11,7%      |
| <b>Nachtschlaf</b>                            | Fenster geöffnet/gekippt | 542                                  | 66,1%      | 207                    | 25,2%      | 71              | 8,7%       |
|                                               | Fenster geschlossen      | 125                                  | 61,9%      | 53                     | 26,2%      | 24              | 11,9%      |
| <b>Wohnbedingungen</b>                        | Nicht gut                | 50                                   | 59,5%      | 21                     | 25,0%      | 13              | 15,5%      |
|                                               | Durchschnittlich         | 349                                  | 62,9%      | 151                    | 27,2%      | 55              | 9,9%       |
|                                               | Sehr gut                 | 270                                  | 69,4%      | 91                     | 23,4%      | 28              | 7,2%       |
| <b>Bedingungen für Kinder</b>                 | Nicht gut                | 21                                   | 44,7%      | 15                     | 31,9%      | 11              | 23,4%      |
|                                               | Durchschnittlich         | 317                                  | 61,7%      | 142                    | 27,6%      | 55              | 10,7%      |
|                                               | Sehr gut                 | 315                                  | 70,5%      | 102                    | 22,8%      | 30              | 6,7%       |
| <b>Verbundenheit zu Innsbruck</b>             | Nicht verbunden          | 29                                   | 52,7%      | 16                     | 29,1%      | 10              | 18,2%      |
|                                               | Durchschnittlich         | 236                                  | 62,4%      | 111                    | 29,4%      | 31              | 8,2%       |
|                                               | Sehr verbunden           | 403                                  | 67,7%      | 137                    | 23,0%      | 55              | 9,2%       |
| <b>Zufriedenheit eigene Wohnsituation</b>     | Nicht zufrieden          | 18                                   | 64,3%      | 7                      | 25,0%      | 3 (*)           | 10,7%      |
|                                               | Durchschnittlich         | 137                                  | 53,1%      | 81                     | 31,4%      | 40              | 15,5%      |
|                                               | Sehr zufrieden           | 514                                  | 69,2%      | 176                    | 23,7%      | 53              | 7,1%       |

|                                                                       |                         |     |       |     |       |    |       |
|-----------------------------------------------------------------------|-------------------------|-----|-------|-----|-------|----|-------|
| <b>Lebensbedingungen<br/>(Summenscore)</b>                            | Nicht gut (*)           | 3   | 60,0% | 1   | 20,0% | 1  | 20,0% |
|                                                                       | Durchschnittlich        | 418 | 62,5% | 180 | 26,9% | 71 | 10,6% |
|                                                                       | Sehr gut                | 249 | 69,9% | 83  | 23,3% | 24 | 6,7%  |
| <b>Lebensqualität</b>                                                 | Nicht gut (*)           | 5   | 50,0% | 1   | 10,0% | 4  | 40,0% |
|                                                                       | Durchschnittlich        | 168 | 57,9% | 90  | 31,0% | 32 | 11,0% |
|                                                                       | Sehr gut                | 492 | 67,9% | 173 | 23,9% | 60 | 8,3%  |
| <b>Lärmempfindlichkeit</b>                                            | Nicht lärmempfindlich   | 200 | 72,7% | 59  | 21,5% | 16 | 5,8%  |
|                                                                       | Durchschnittlich        | 369 | 63,2% | 156 | 26,7% | 59 | 10,1% |
|                                                                       | Sehr lärmempfindlich    | 101 | 59,1% | 49  | 28,7% | 21 | 12,3% |
| <b>Summenscore</b>                                                    | Coping ausgeprägt       | 112 | 46,3% | 87  | 36,0% | 43 | 17,8% |
| <b>Lärmcoping</b>                                                     | Coping nicht ausgeprägt | 558 | 70,9% | 177 | 22,5% | 52 | 6,6%  |
| <b>Gefühlte Zunahme</b>                                               | Ja                      | 212 | 48,6% | 148 | 33,9% | 76 | 17,4% |
| <b>Lärmbelastung</b>                                                  | Nein                    | 458 | 77,1% | 116 | 19,5% | 20 | 3,4%  |
| <b>Gefühlte Abnahme</b>                                               | Ja                      | 40  | 69,0% | 16  | 27,6% | 2  | 3,4%  |
| <b>Lärmbelastung</b>                                                  | Nein                    | 630 | 64,8% | 248 | 25,5% | 94 | 9,7%  |
| <b>Notwendigkeit (weiterer) Maßnahmen Lärm</b>                        | Maßnahmen notwendig     | 435 | 63,0% | 179 | 25,9% | 76 | 11,0% |
|                                                                       | Keine Maßnahmen nötig   | 129 | 67,2% | 47  | 24,5% | 16 | 8,3%  |
| <b>Negative Gesundheitswirkungen Lärm</b>                             | Gering                  | 160 | 73,7% | 42  | 19,4% | 15 | 6,9%  |
|                                                                       | Stark                   | 490 | 62,8% | 214 | 27,4% | 76 | 9,7%  |
| <b>Lautheit Innsbruck im Vergleich zu anderen Städten Österreichs</b> | Ruhiger                 | 199 | 68,2% | 69  | 23,6% | 24 | 8,2%  |
|                                                                       | Gleich                  | 362 | 65,7% | 138 | 25,0% | 51 | 9,3%  |
|                                                                       | Lauter                  | 100 | 57,5% | 54  | 31,0% | 20 | 11,5% |

(\*) zu kleine Fallzahlen für solide Auswertungen

## 6. Belästigung durch Nachbarschaftslärm

Über 70% aller Befragten fühlen sich durch Nachbarschaftslärm gar nicht oder nur geringfügig gestört, 5% hingegen stark belästigt:

**Abbildung 162: Belästigung durch Nachbarschaftslärm in Prozent**

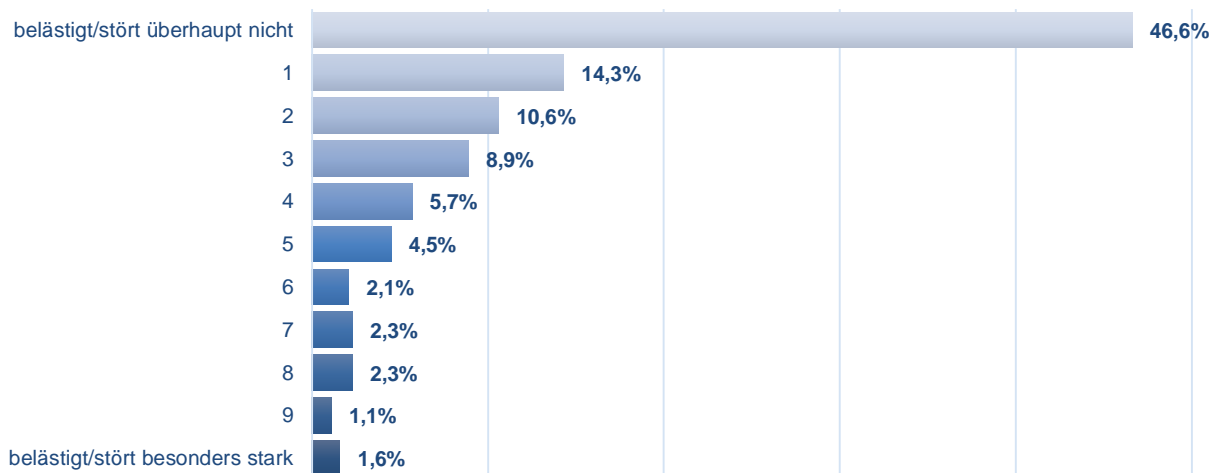

Im Mittel liegen die Antworten der befragten Probandinnen und Probanden bei 1,81 (19,9%):

**Tabelle 128: Belästigung durch Nachbarschaftslärm gruppiert**

|                        | Häufigkeit | Gültige Prozente | Kumulierte Prozente |
|------------------------|------------|------------------|---------------------|
| Gering belästigt       | 736        | 71,4             | 71,4                |
| Mittelgradig belästigt | 243        | 23,6             | 95,0                |
| Stark belästigt        | 52         | 5,0              | 100,0               |
| Gesamt                 | 1031       | 100,0            |                     |

## 6.1. Nachbarschaftslärmbelästigung und Katastralgemeinden

In Innsbruck, Wilten und Pradl fühlen sich die Befragten am stärksten vom Nachbarschaftslärm belästigt, in Igls, Vill und Mühlau am wenigsten:

**Abbildung 163: Nachbarschaftslärmbelästigung und Katastralgemeinden im Mittelwertvergleich**

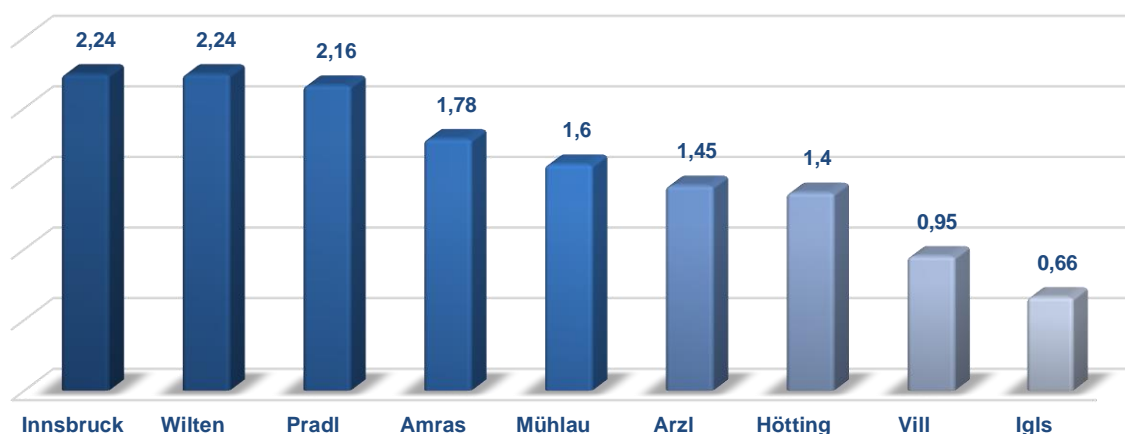

## 6.2. Nachbarschaftslärmbelästigung und ausgewählte Parameter

Wie schon bei den anderen Belästigungsauswertungen fühlt sich die mittlere Altersgruppe der 41 bis 60-Jährigen auch vom Nachbarschaftslärm am stärksten gestört. Zwischen den Geschlechtern gibt es hingegen kaum Unterschiede in der Belästigungsreaktion.

Aus den Auswertungen ist ersichtlich, dass Nachbarschaftslärm und die daraus resultierende Belästigung, sofern diese als stark wahrgenommen wird, sich ganz erheblich auf eine ganze Reihe von Einschätzungen zu den persönlichen Wohn- und Lebensbedingungen auswirkt. Diese werden von den stärker vom Nachbarschaftslärm belästigten befragten Innsbruckerinnen und Innsbruckern deutlich schlechter eingestuft, als von sich nur geringfügig lärmgestört Empfindenden.

Gleiches gilt, jeweils wechselseitig, auch für die Einschätzung der eigenen Lärmempfindlichkeit und der eigenen Lebensqualität.

**Abbildung 164: Zufriedenheit mit der eigenen Wohnsituation und Belästigung durch Nachbarschaftslärm im Mittelwertvergleich**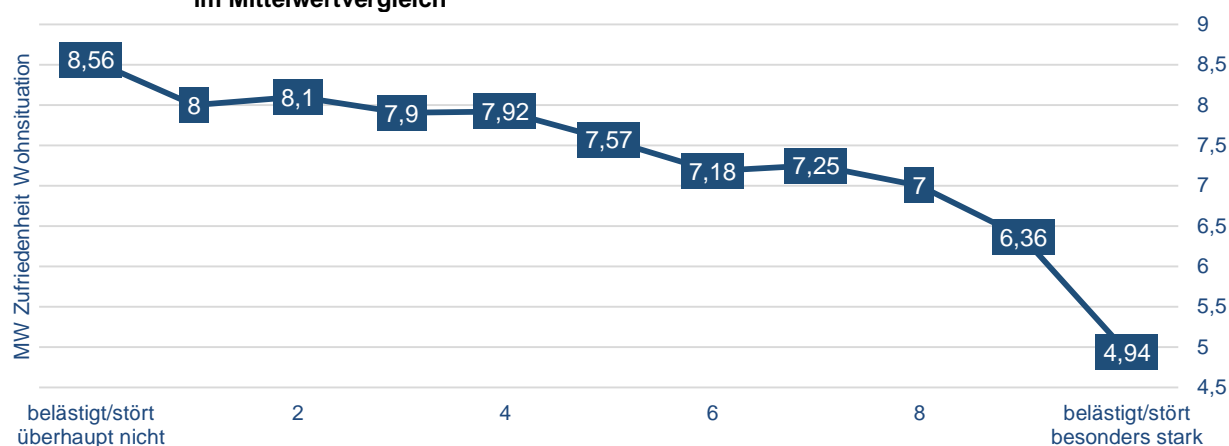**Tabelle 129: Belästigung durch Nachbarschaftslärm und ausgewählte Parameter (gruppiert)**

|                                               |                           | Belästigung Nachbarschaftslärm gruppiert |            |                        |            |                 |            |
|-----------------------------------------------|---------------------------|------------------------------------------|------------|------------------------|------------|-----------------|------------|
|                                               |                           | Gering belästigt                         |            | Mittelgradig belästigt |            | Stark belästigt |            |
|                                               |                           | Anzahl                                   | Zeilen (%) | Anzahl                 | Zeilen (%) | Anzahl          | Zeilen (%) |
| <b>Geschlecht</b>                             | weiblich                  | 388                                      | 71,7%      | 123                    | 22,7%      | 30              | 5,5%       |
|                                               | männlich                  | 348                                      | 71,0%      | 120                    | 24,5%      | 22              | 4,5%       |
| <b>Altersgruppen</b>                          | 18 bis 40 Jahre           | 312                                      | 70,9%      | 111                    | 25,2%      | 17              | 3,9%       |
|                                               | 41 bis 60 Jahre           | 210                                      | 66,5%      | 79                     | 25,0%      | 27              | 8,5%       |
|                                               | über 60 Jahre             | 214                                      | 77,8%      | 53                     | 19,3%      | 8               | 2,9%       |
| <b>Bildungsschicht</b>                        | Primärer Schulabschluss   | 71                                       | 72,4%      | 20                     | 20,4%      | 7               | 7,1%       |
|                                               | Sekundärer Schulabschluss | 388                                      | 71,6%      | 130                    | 24,0%      | 24              | 4,4%       |
|                                               | Tertiärer Schulabschluss  | 274                                      | 70,6%      | 93                     | 24,0%      | 21              | 5,4%       |
| <b>Haushalt mit/ohne minderjährige Kinder</b> | Haushalt ohne Kinder      | 533                                      | 69,9%      | 187                    | 24,5%      | 42              | 5,5%       |
|                                               | Haushalt mit Kindern      | 203                                      | 75,5%      | 56                     | 20,8%      | 10              | 3,7%       |
| <b>Nachtschlaf</b>                            | Fenster geöffnet/gekippt  | 599                                      | 73,0%      | 189                    | 23,0%      | 33              | 4,0%       |
|                                               | Fenster geschlossen       | 131                                      | 64,9%      | 52                     | 25,7%      | 19              | 9,4%       |
| <b>Wohnbedingungen</b>                        | Nicht gut                 | 52                                       | 61,9%      | 20                     | 23,8%      | 12              | 14,3%      |
|                                               | Durchschnittlich          | 380                                      | 68,5%      | 150                    | 27,0%      | 25              | 4,5%       |
|                                               | Sehr gut                  | 302                                      | 77,4%      | 73                     | 18,7%      | 15              | 3,8%       |
| <b>Bedingungen für Kinder</b>                 | Nicht gut                 | 22                                       | 46,8%      | 16                     | 34,0%      | 9               | 19,1%      |
|                                               | Durchschnittlich          | 351                                      | 68,2%      | 138                    | 26,8%      | 26              | 5,0%       |
|                                               | Sehr gut                  | 345                                      | 77,2%      | 85                     | 19,0%      | 17              | 3,8%       |
| <b>Verbundenheit zu Innsbruck</b>             | Nicht verbunden           | 33                                       | 60,0%      | 13                     | 23,6%      | 9               | 16,4%      |
|                                               | Durchschnittlich          | 268                                      | 70,7%      | 97                     | 25,6%      | 14              | 3,7%       |
|                                               | Sehr verbunden            | 434                                      | 72,9%      | 132                    | 22,2%      | 29              | 4,9%       |
| <b>Zufriedenheit eigene Wohnsituation</b>     | Nicht zufrieden           | 13                                       | 46,4%      | 6                      | 21,4%      | 9               | 32,1%      |
|                                               | Durchschnittlich          | 153                                      | 59,3%      | 87                     | 33,7%      | 18              | 7,0%       |
|                                               | Sehr zufrieden            | 569                                      | 76,5%      | 150                    | 20,2%      | 25              | 3,4%       |
| <b>Lebensbedingungen</b>                      | Nicht gut (*)             | 3                                        | 60,0%      | 1                      | 20,0%      | 1               | 20,0%      |

|                                                                       |                         |     |       |       |       |       |       |
|-----------------------------------------------------------------------|-------------------------|-----|-------|-------|-------|-------|-------|
| <b>(Summenscore)</b>                                                  | Durchschnittlich        | 443 | 66,1% | 186   | 27,8% | 41    | 6,1%  |
|                                                                       | Sehr gut                | 290 | 81,5% | 56    | 15,7% | 10    | 2,8%  |
| <b>Lebensqualität</b>                                                 | Nicht gut (*)           | 5   | 50,0% | 2     | 20,0% | 3     | 30,0% |
|                                                                       | Durchschnittlich        | 178 | 61,4% | 87    | 30,0% | 25    | 8,6%  |
|                                                                       | Sehr gut                | 549 | 75,7% | 152   | 21,0% | 24    | 3,3%  |
| <b>Lärmempfindlichkeit</b>                                            | Nicht lärmempfindlich   | 220 | 80,0% | 46    | 16,7% | 9     | 3,3%  |
|                                                                       | Durchschnittlich        | 409 | 70,0% | 146   | 25,0% | 29    | 5,0%  |
|                                                                       | Sehr lärmempfindlich    | 107 | 62,2% | 51    | 29,7% | 14    | 8,1%  |
| <b>Summenscore</b>                                                    | Coping ausgeprägt       | 125 | 51,7% | 83    | 34,3% | 34    | 14,0% |
| <b>Lärmcoping</b>                                                     | Coping nicht ausgeprägt | 611 | 77,5% | 160   | 20,3% | 17    | 2,2%  |
| <b>Notwendigkeit (weiterer) Maßnahmen Lärm</b>                        | Maßnahmen notwendig     | 467 | 67,6% | 181   | 26,2% | 43    | 6,2%  |
|                                                                       | Keine Maßnahmen nötig   | 152 | 79,2% | 36    | 18,8% | 4     | 2,1%  |
| <b>Negative Gesundheitswirkungen Lärm</b>                             | Gering                  | 171 | 78,8% | 43    | 19,8% | 3 (*) | 1,4%  |
|                                                                       | Stark                   | 545 | 69,8% | 188   | 24,1% | 48    | 6,1%  |
| <b>Lautheit Innsbruck im Vergleich zu anderen Städten Österreichs</b> | Ruhiger                 | 207 | 70,9% | 71    | 24,3% | 14    | 4,8%  |
|                                                                       | Gleich                  | 404 | 73,3% | 124   | 22,5% | 23    | 4,2%  |
|                                                                       | Lauter                  | 112 | 64,4% | 47    | 27,0% | 15    | 8,6%  |
| <b>Einschätzung eigener Lärmbeitrag</b>                               | Gering                  | 560 | 72,3% | 184   | 23,7% | 31    | 4,0%  |
|                                                                       | Durchschnittlich        | 155 | 68,3% | 55    | 24,2% | 17    | 7,5%  |
|                                                                       | Groß                    | 21  | 72,4% | 4 (*) | 13,8% | 4 (*) | 13,8% |

(\*) zu kleine Fallzahlen für solide Auswertungen

## 7. Belästigung durch Lärm von Passanten und Gaststätten

Die Belästigungsreaktion auf den Lärm von Passanten und Gaststätten ist nahezu deckungsgleich mit derjenigen auf Nachbarschaftslärm. 4,8% fühlen sich ganz erheblich gestört, 72,6% hingegen nur sehr geringfügig (davon knapp 53% *überhaupt nicht*). Im Mittel liegen die Antworten der befragten Probandinnen und Probanden bei 1,71 (18,8%):

**Abbildung 165: Belästigung durch Lärm von Passanten und Gaststätten in Prozent**

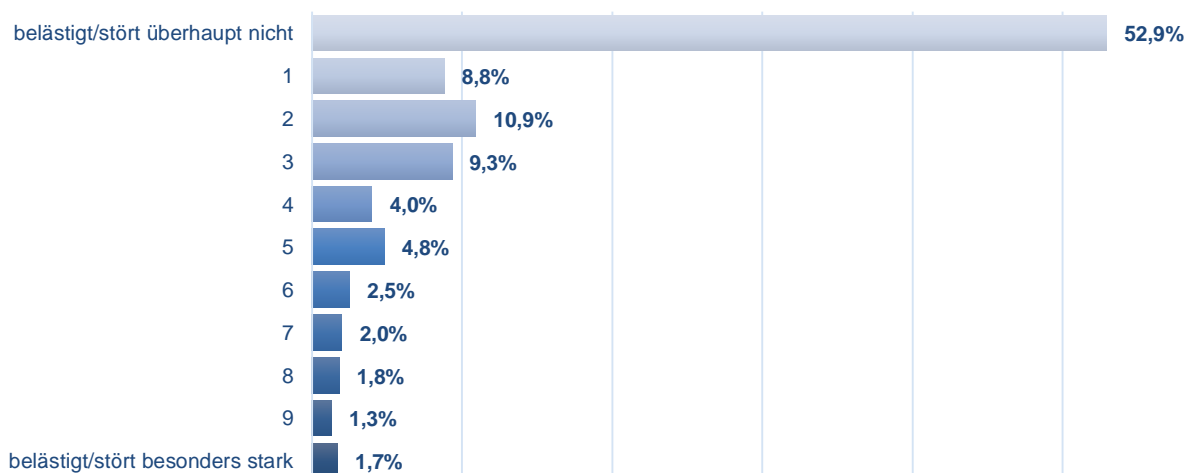

**Tabelle 130: Belästigung durch Lärm von Passanten und Gaststätten gruppiert**

|                        | Häufigkeit | Gültige Prozente | Kumulierte Prozente |
|------------------------|------------|------------------|---------------------|
| Gering belästigt       | 748        | 72,6             | 72,6                |
| Mittelgradig belästigt | 233        | 22,6             | 95,2                |
| Stark belästigt        | 50         | 4,8              | 100,0               |
| Gesamt                 | 1031       | 100,0            |                     |

### 7.1. Lärmbelästigung Passanten / Gaststätten und Katastralgemeinden

Das Empfinden der eigenen Belästigung durch den Lärm von Passanten und Gaststätten unterscheidet sich am deutlichsten aller Belästigungsfragen zwischen den einzelnen Katastralgemeinden Innsbrucks und ist in Abhängigkeit von der Anzahl der vorhandenen Lokale, Sehenswürdigkeiten, der Bevölkerungsdichte etc. zu sehen, wodurch sich die inneren Stadtbezirke von den äußeren abheben:

**Abbildung 166: Lärmbelästigung Passanten / Gaststätten und Katastralgemeinden im Mittelwertvergleich**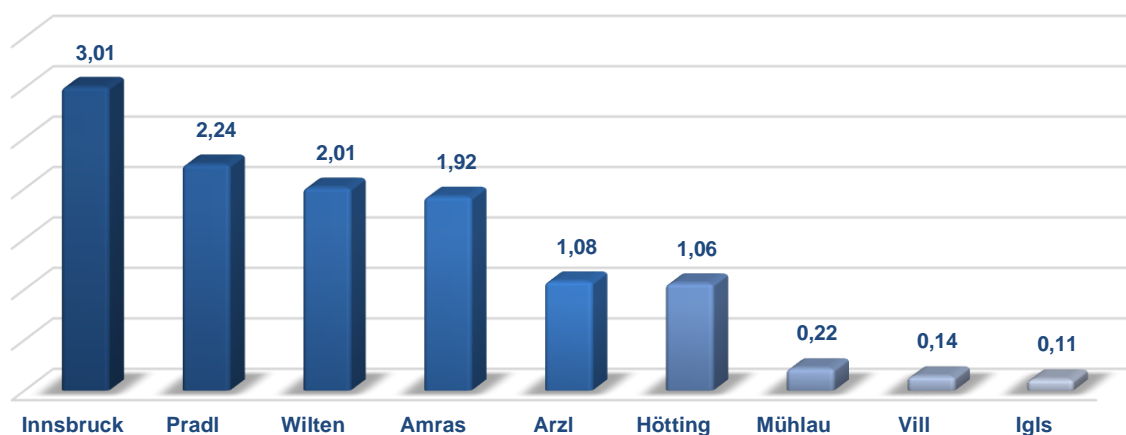

### 7.2. Lärmbelästigung Passanten / Gaststätten und einzelne Parameter

Im Folgenden einige ausgewählte Parameter, jeweils in Extremgruppen zusammengefasst, in Zusammenschau mit der Belästigung durch den Lärm ausgehend von Passanten und Gaststätten:

**Tabelle 131: Belästigung durch Lärm von Passanten und Gaststätten und ausgewählte Parameter**

|                      |                 | Belästigung Lärm von Passanten und Gaststätten gruppiert |            |                        |            |                 |            |
|----------------------|-----------------|----------------------------------------------------------|------------|------------------------|------------|-----------------|------------|
|                      |                 | Gering belästigt                                         |            | Mittelgradig belästigt |            | Stark belästigt |            |
|                      |                 | Anzahl                                                   | Zeilen (%) | Anzahl                 | Zeilen (%) | Anzahl          | Zeilen (%) |
| <b>Geschlecht</b>    | weiblich        | 382                                                      | 70,6%      | 132                    | 24,4%      | 27              | 5,0%       |
|                      | männlich        | 366                                                      | 74,7%      | 101                    | 20,6%      | 23              | 4,7%       |
| <b>Altersgruppen</b> | 18 bis 40 Jahre | 306                                                      | 69,5%      | 111                    | 25,2%      | 23              | 5,2%       |
|                      | 41 bis 60 Jahre | 229                                                      | 72,5%      | 65                     | 20,6%      | 22              | 7,0%       |



|                                                                       |                           |     |       |     |       |    |       |
|-----------------------------------------------------------------------|---------------------------|-----|-------|-----|-------|----|-------|
|                                                                       | über 60 Jahre             | 213 | 77,5% | 57  | 20,7% | 5  | 1,8%  |
| <b>Bildungsschicht</b>                                                | Primärer Schulabschluss   | 74  | 75,5% | 20  | 20,4% | 4  | 4,1%  |
|                                                                       | Sekundärer Schulabschluss | 390 | 72,0% | 123 | 22,7% | 29 | 5,4%  |
|                                                                       | Tertiärer Schulabschluss  | 282 | 72,7% | 89  | 22,9% | 17 | 4,4%  |
| <b>Innenhof bzw. lärm-abgewandte Seite</b>                            | Ja                        | 491 | 70,0% | 179 | 25,5% | 31 | 4,4%  |
|                                                                       | Nein                      | 242 | 78,6% | 47  | 15,3% | 19 | 6,2%  |
| <b>Nachtschlaf</b>                                                    | Fenster geöffnet/gekippt  | 620 | 75,5% | 170 | 20,7% | 31 | 3,8%  |
|                                                                       | Fenster geschlossen       | 123 | 60,9% | 60  | 29,7% | 19 | 9,4%  |
| <b>Wohnbedingungen</b>                                                | Nicht gut                 | 49  | 58,3% | 26  | 31,0% | 9  | 10,7% |
|                                                                       | Durchschnittlich          | 386 | 69,5% | 145 | 26,1% | 24 | 4,3%  |
|                                                                       | Sehr gut                  | 311 | 79,7% | 62  | 15,9% | 17 | 4,4%  |
| <b>Bedingungen für Kinder</b>                                         | Nicht gut                 | 23  | 48,9% | 15  | 31,9% | 9  | 19,1% |
|                                                                       | Durchschnittlich          | 351 | 68,2% | 139 | 27,0% | 25 | 4,9%  |
|                                                                       | Sehr gut                  | 356 | 79,6% | 76  | 17,0% | 15 | 3,4%  |
| <b>Verbundenheit zu Innsbruck</b>                                     | Nicht verbunden           | 35  | 63,6% | 12  | 21,8% | 8  | 14,5% |
|                                                                       | Durchschnittlich          | 282 | 74,4% | 85  | 22,4% | 12 | 3,2%  |
|                                                                       | Sehr verbunden            | 429 | 72,1% | 136 | 22,9% | 30 | 5,0%  |
| <b>Zufriedenheit eigene Wohnsituation</b>                             | Nicht zufrieden           | 17  | 60,7% | 8   | 28,6% | 3  | 10,7% |
|                                                                       | Durchschnittlich          | 142 | 55,0% | 94  | 36,4% | 22 | 8,5%  |
|                                                                       | Sehr zufrieden            | 588 | 79,0% | 131 | 17,6% | 25 | 3,4%  |
| <b>Lebensbedingungen (Summenscore)</b>                                | Nicht gut                 | 2   | 40,0% | 2   | 40,0% | 1  | 20,0% |
|                                                                       | Durchschnittlich          | 457 | 68,2% | 177 | 26,4% | 36 | 5,4%  |
|                                                                       | Sehr gut                  | 289 | 81,2% | 54  | 15,2% | 13 | 3,7%  |
| <b>Lebensqualität</b>                                                 | Nicht gut                 | 6   | 60,0% | 0   | 0,0%  | 4  | 40,0% |
|                                                                       | Durchschnittlich          | 176 | 60,7% | 102 | 35,2% | 12 | 4,1%  |
|                                                                       | Sehr gut                  | 561 | 77,4% | 130 | 17,9% | 34 | 4,7%  |
| <b>Lärmempfindlichkeit</b>                                            | Nicht lärmempfindlich     | 222 | 80,7% | 42  | 15,3% | 11 | 4,0%  |
|                                                                       | Durchschnittlich          | 413 | 70,7% | 145 | 24,8% | 26 | 4,5%  |
|                                                                       | Sehr lärmempfindlich      | 113 | 65,7% | 46  | 26,7% | 13 | 7,6%  |
| <b>Summenscore</b>                                                    | Coping ausgeprägt         | 121 | 50,0% | 92  | 38,0% | 29 | 12,0% |
| <b>Lärmcoping</b>                                                     | Coping nicht ausgeprägt   | 627 | 79,6% | 140 | 17,8% | 21 | 2,7%  |
| <b>Gefühlte Zunahme Lärmbelastung</b>                                 | Ja                        | 271 | 62,2% | 133 | 30,5% | 32 | 7,3%  |
|                                                                       | Nein                      | 477 | 80,2% | 100 | 16,8% | 18 | 3,0%  |
| <b>Gefühlte Abnahme Lärmbelastung</b>                                 | Ja                        | 40  | 69,0% | 15  | 25,9% | 3  | 5,2%  |
|                                                                       | Nein                      | 708 | 72,8% | 218 | 22,4% | 47 | 4,8%  |
| <b>Notwendigkeit (weiterer) Maßnahmen Lärm</b>                        | Maßnahmen notwendig       | 476 | 68,9% | 171 | 24,7% | 44 | 6,4%  |
|                                                                       | Keine Maßnahmen nötig     | 152 | 79,2% | 36  | 18,8% | 4  | 2,1%  |
| <b>Negative Gesundheitswirkungen Lärm</b>                             | Gering                    | 167 | 77,0% | 46  | 21,2% | 4  | 1,8%  |
|                                                                       | Stark                     | 557 | 71,3% | 179 | 22,9% | 45 | 5,8%  |
| <b>Lautheit Innsbruck im Vergleich zu anderen Städten Österreichs</b> | Ruhiger                   | 227 | 77,7% | 57  | 19,5% | 8  | 2,7%  |
|                                                                       | Gleich                    | 406 | 73,7% | 115 | 20,9% | 30 | 5,4%  |
|                                                                       | Lauter                    | 104 | 59,8% | 58  | 33,3% | 12 | 6,9%  |

Anm.: In mehreren Subgruppen sind die Fallzahlen für solide Auswertungen zu gering

Die Beziehungen zwischen ausgewählten Items aus dem Fragebogen und der Belästigung durch Passanten und Gaststätten gestaltet sich sehr ähnlich den anderen Belästigungslärmquellen.

## 8. Belästigung durch Schienenverkehrslärm

Deutlich über zwei Drittel aller befragten Innsbruckerinnen und Innsbrucker *stört* der Schienenverkehrslärm in ihrem Wohnumfeld *überhaupt nicht* und über 80% aller Probandinnen und Probanden sehen sich selbst als nur gering vom Schienenverkehrslärm belästigt an (gruppierte Antwortkategorien 0 [=belästigt / stört überhaupt nicht], 1 und 2). Rund 3% sehen sich hingegen als starkbelästigt (*highly annoyed*: gruppierte Antwortkategorien 8, 9 und 10 [=belästigt / stört besonders stark]) und 15,6% der Befragten antwortet in den mittleren Kategorien:

**Abbildung 167: Belästigung durch Schienenverkehrslärm in Prozent**

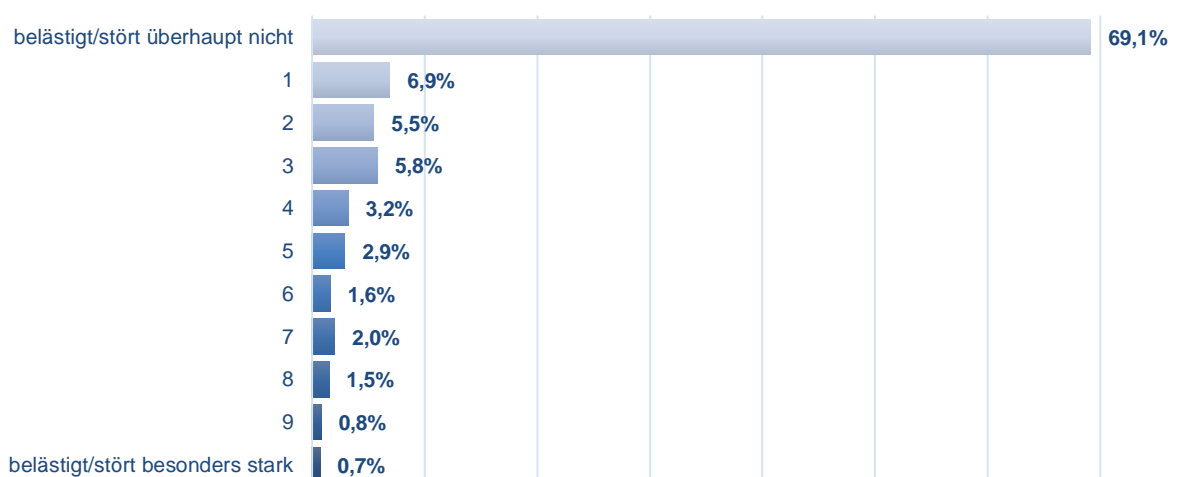

Im Mittel liegen die Antworten der Befragten bei 1,12 (12,3%):

**Tabelle 132: Belästigung durch Schienenverkehrslärm gruppiert**

|                        | Häufigkeit | Gültige Prozente | Kumulierte Prozente |
|------------------------|------------|------------------|---------------------|
| Gering belästigt       | 840        | 81,5             | 81,5                |
| Mittelgradig belästigt | 161        | 15,6             | 97,1                |
| Stark belästigt        | 30         | 2,9              | 100,0               |
| Gesamt                 | 1031       | 100,0            |                     |

### 8.1. Schienenlärmbelästigung, -Belastung und -Expositionsempfinden

Im Vergleich mit der Belästigung durch den Straßenverkehrslärm und insbesondere mit dem Flugverkehrslärm ist das deutlich geringere Belästigungsausmaß durch den Schienenverkehrslärm auffällig. Diese geringere Störung der befragten Innsbruckerinnen und Innsbrucker durch den Schienenverkehrslärm spiegelt sich auch in der Zusammenschau der Belästigung durch den Schienenverkehrs-

lärm mit der gegebenen Schienenlärmbelastung. Das Belästigungsausmaß im niederen Belastungsbereich fällt sehr gering aus und steigt erst bei höheren gegebenen Lärmpegeln über 50dB  $L_{den}$  stärker an. Das Ausmaß der empfundenen Störung durch den Schienenverkehrslärm deckt sich dabei nahezu 1:1 mit der empfundenen Ausgesetzttheit gegenüber demselben. Lediglich in der höchsten Belastungskategorie über 60dB-Dauerbelastung (24h- $L_{den}$ ) wird – wie schon beim Flug- und beim Straßenverkehrslärm – die Ausgesetzttheit von den Befragten höher angesetzt als die Belästigung:

**Abbildung 168: Schienenlärmbelastung und –Expositionsempfinden und 24h-Schienenlärmbelastung  $L_{den}$  in 10dB-Schritten im Mittelwertvergleich**

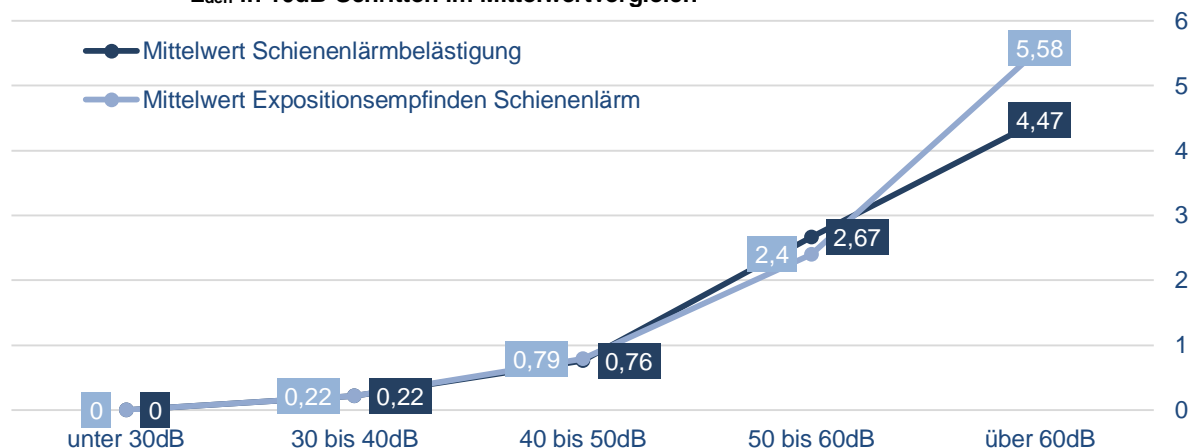

Anm.: Die Darstellung zeigt nachvollziehbare Zusammenhänge auf, enthält jedoch keine Prüfungen auf Kovariablen und andere Prädiktoren und ist somit nicht den Dosis-Wirkungskurven aus der gängigen Fachliteratur gleichzusetzen.

## 8.2. Schienenlärmbelastung und Katastralgemeinden

Entsprechend der gegebenen Schienenverkehrslärmbelastung zeigt sich die stärkste Schienenlärmbelastung in Wilten und Innsbruck. Die geringste Störung durch Schienenlärm im eigenen Wohnumfeld empfinden die Befragten in Igls, Vill und Amras, wo fast überhaupt keine Belästigung durch den Schienenverkehrslärm von den Befragten festgestellt wird:

**Abbildung 169: Schienenverkehrslärmbelastung und Katastralgemeinden im Mittelwertvergleich**

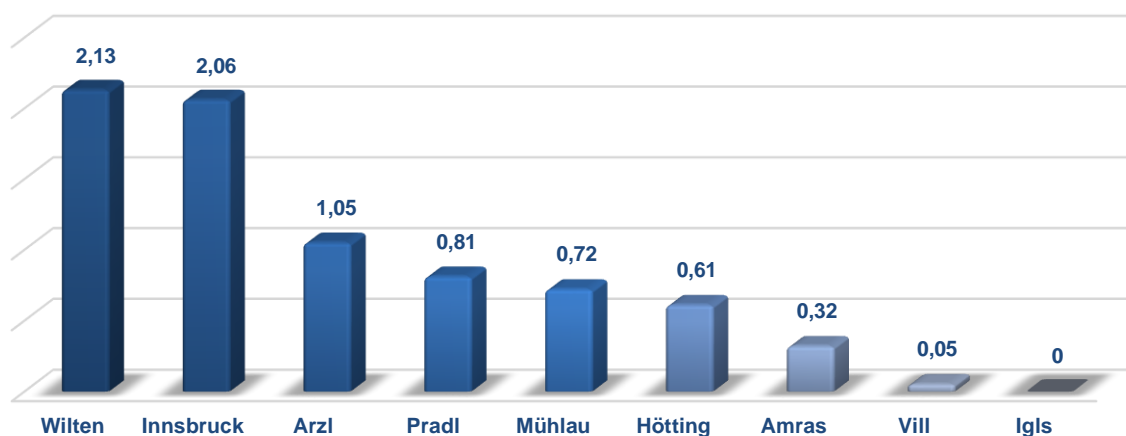

### 8.3. Schienenlärmelastung und ausgewählte Parameter

Wie schon bei den anderen Verkehrslärmelastungsauswertungen zeigen sich Frauen auch vom Schienenverkehrslärm stärker belästigt als Männer. Auch steigt das Belästigungsausmaß mit zunehmendem höchsten erreichten Schulabschluss an:

**Tabelle 133: Schienenverkehrslärmelastung und Bildungsschicht im Mittelwertvergleich**

Belästigung Schienenverkehrslärm

| Bildungsschicht           | Mittelwert | N    | Standardabweichung |
|---------------------------|------------|------|--------------------|
| Primärer Schulabschluss   | ,51        | 98   | 1,548              |
| Sekundärer Schulabschluss | 1,09       | 542  | 2,039              |
| Tertiärer Schulabschluss  | 1,34       | 388  | 2,397              |
| Insgesamt                 | 1,13       | 1028 | 2,153              |

Die Schienenverkehrslärmelastung zeigt insgesamt in der Kombination mit anderen Parametern geringere Bezüge als die Belästigung durch Straßen- und Flugverkehrslärm, aber dieselben Tendenzen: Je höher das Belästigungsausmaß, desto geringer werden Wohn- und Lebensbedingungen etc. eingeschätzt:

**Abbildung 170: Güte der Wohnbedingungen und Belästigung durch Schienenverkehrslärm nach 24h-Schienenlärmelastung  $L_{den}$  in 10dB-Schritten im Mittelwertvergleich**

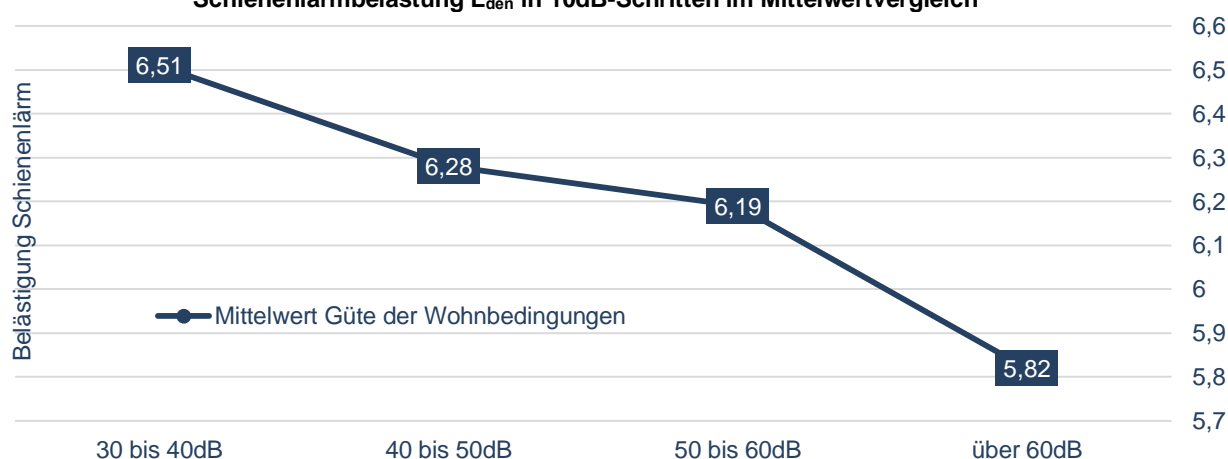

**Tabelle 134: Belästigung durch Schienenverkehrslärm und ausgewählte Parameter (gruppiert)**

|                        |                         | Belästigung Schienenverkehrslärm gruppiert |            |                        |            |                 |            |
|------------------------|-------------------------|--------------------------------------------|------------|------------------------|------------|-----------------|------------|
|                        |                         | Gering belästigt                           |            | Mittelgradig belästigt |            | Stark belästigt |            |
|                        |                         | Anzahl                                     | Zeilen (%) | Anzahl                 | Zeilen (%) | Anzahl          | Zeilen (%) |
| <b>Geschlecht</b>      | weiblich                | 432                                        | 79,9%      | 91                     | 16,8%      | 18              | 3,3%       |
|                        | männlich                | 408                                        | 83,3%      | 70                     | 14,3%      | 12              | 2,4%       |
| <b>Altersgruppen</b>   | 18 bis 40 Jahre         | 357                                        | 81,1%      | 69                     | 15,7%      | 14              | 3,2%       |
|                        | 41 bis 60 Jahre         | 255                                        | 80,7%      | 49                     | 15,5%      | 12              | 3,8%       |
|                        | über 60 Jahre           | 228                                        | 82,9%      | 43                     | 15,6%      | 4               | 1,5%       |
| <b>Bildungsschicht</b> | Primärer Schulabschluss | 91                                         | 92,9%      | 5                      | 5,1%       | 2               | 2,0%       |

|                                                                       |                           |     |        |     |       |    |      |
|-----------------------------------------------------------------------|---------------------------|-----|--------|-----|-------|----|------|
|                                                                       | Sekundärer Schulabschluss | 444 | 81,9%  | 87  | 16,1% | 11 | 2,0% |
|                                                                       | Tertiärer Schulabschluss  | 302 | 77,8%  | 69  | 17,8% | 17 | 4,4% |
| <b>Baulicher Schutz vor Verkehrslärm</b>                              | Keiner bis geringfügig    | 608 | 79,4%  | 134 | 17,5% | 24 | 3,1% |
|                                                                       | Gut bis komplett          | 207 | 87,7%  | 23  | 9,7%  | 6  | 2,5% |
| <b>Innenhof bzw. lärm-abgewandte Seite</b>                            | Ja                        | 580 | 82,7%  | 104 | 14,8% | 17 | 2,4% |
|                                                                       | Nein                      | 244 | 79,2%  | 51  | 16,6% | 13 | 4,2% |
| <b>Nachtschlaf</b>                                                    | Fenster geöffnet/gekippt  | 683 | 83,2%  | 118 | 14,4% | 20 | 2,4% |
|                                                                       | Fenster geschlossen       | 149 | 73,8%  | 43  | 21,3% | 10 | 5,0% |
| <b>Wohnbedingungen</b>                                                | Nicht gut                 | 66  | 78,6%  | 14  | 16,7% | 4  | 4,8% |
|                                                                       | Durchschnittlich          | 441 | 79,5%  | 92  | 16,6% | 22 | 4,0% |
|                                                                       | Sehr gut                  | 331 | 84,9%  | 55  | 14,1% | 4  | 1,0% |
| <b>Bedingungen für Kinder</b>                                         | Nicht gut                 | 34  | 72,3%  | 10  | 21,3% | 3  | 6,4% |
|                                                                       | Durchschnittlich          | 409 | 79,4%  | 90  | 17,5% | 16 | 3,1% |
|                                                                       | Sehr gut                  | 379 | 84,8%  | 57  | 12,8% | 11 | 2,5% |
| <b>Zufriedenheit eigene Wohnsituation</b>                             | Nicht zufrieden           | 20  | 71,4%  | 6   | 21,4% | 2  | 7,1% |
|                                                                       | Durchschnittlich          | 199 | 77,1%  | 49  | 19,0% | 10 | 3,9% |
|                                                                       | Sehr zufrieden            | 620 | 83,3%  | 106 | 14,2% | 18 | 2,4% |
| <b>Lebensbedingungen (Summenscore)</b>                                | Nicht gut                 | 2   | 40,0%  | 3   | 60,0% | 0  | 0,0% |
|                                                                       | Durchschnittlich          | 525 | 78,4%  | 117 | 17,5% | 28 | 4,2% |
|                                                                       | Sehr gut                  | 313 | 87,9%  | 41  | 11,5% | 2  | 0,6% |
| <b>Lebensqualität</b>                                                 | Nicht gut                 | 10  | 100,0% | 0   | 0,0%  | 0  | 0,0% |
|                                                                       | Durchschnittlich          | 227 | 78,3%  | 55  | 19,0% | 8  | 2,8% |
|                                                                       | Sehr gut                  | 597 | 82,3%  | 106 | 14,6% | 22 | 3,0% |
| <b>Lärmempfindlichkeit</b>                                            | Nicht lärmempfindlich     | 237 | 86,2%  | 35  | 12,7% | 3  | 1,1% |
|                                                                       | Durchschnittlich          | 468 | 80,1%  | 96  | 16,4% | 20 | 3,4% |
|                                                                       | Sehr lärmempfindlich      | 135 | 78,5%  | 30  | 17,4% | 7  | 4,1% |
| <b>Summenscore Lärmcoping</b>                                         | Coping ausgeprägt         | 166 | 68,6%  | 60  | 24,8% | 16 | 6,6% |
|                                                                       | Coping nicht ausgeprägt   | 673 | 85,4%  | 101 | 12,8% | 14 | 1,8% |
| <b>Gefühlte Zunahme Lärmbelastung</b>                                 | Ja                        | 338 | 77,5%  | 81  | 18,6% | 17 | 3,9% |
|                                                                       | Nein                      | 502 | 84,4%  | 80  | 13,4% | 13 | 2,2% |
| <b>Gefühlte Abnahme Lärmbelastung</b>                                 | Ja                        | 45  | 77,6%  | 11  | 19,0% | 2  | 3,4% |
|                                                                       | Nein                      | 795 | 81,7%  | 150 | 15,4% | 28 | 2,9% |
| <b>Notwendigkeit (weiterer) Maßnahmen Lärm</b>                        | Maßnahmen notwendig       | 544 | 78,7%  | 121 | 17,5% | 26 | 3,8% |
|                                                                       | Keine Maßnahmen nötig     | 167 | 87,0%  | 24  | 12,5% | 1  | 0,5% |
| <b>Negative Gesundheitswirkungen Lärm</b>                             | Gering                    | 184 | 84,8%  | 27  | 12,4% | 6  | 2,8% |
|                                                                       | Stark                     | 626 | 80,2%  | 132 | 16,9% | 23 | 2,9% |
| <b>Lautheit Innsbruck im Vergleich zu anderen Städten Österreichs</b> | Ruhiger                   | 246 | 84,2%  | 44  | 15,1% | 2  | 0,7% |
|                                                                       | Gleich                    | 450 | 81,7%  | 81  | 14,7% | 20 | 3,6% |
|                                                                       | Lauter                    | 133 | 76,4%  | 33  | 19,0% | 8  | 4,6% |
| <b>Einschätzung eigener Lärmbeitrag</b>                               | Gering                    | 634 | 81,8%  | 113 | 14,6% | 28 | 3,6% |
|                                                                       | Durchschnittlich          | 181 | 79,7%  | 44  | 19,4% | 2  | 0,9% |
|                                                                       | Groß                      | 25  | 86,2%  | 4   | 13,8% | 0  | 0,0% |

Anm.: In mehreren Subgruppen sind die Fallzahlen für solide Auswertungen zu gering

## 9. Belästigung durch Erschütterungen

Die Belästigungsreaktion auf Erschütterungen ist in ihren Dimensionen der auf Schienenverkehrslärm sehr ähnlich. Über 70% werden von Erschütterungen *überhaupt nicht gestört*, 83,6% des befragten Kollektivs sind der Kategorie der Geringbelästigten zuzuordnen, wohingegen 3,3% sich selbst als stark belästigt einschätzen. Im Mittel liegen die Antworten der befragten Probandinnen und Probanden bei 1,09 (12,0%):

**Abbildung 171: Belästigung durch Erschütterungen in Prozent**

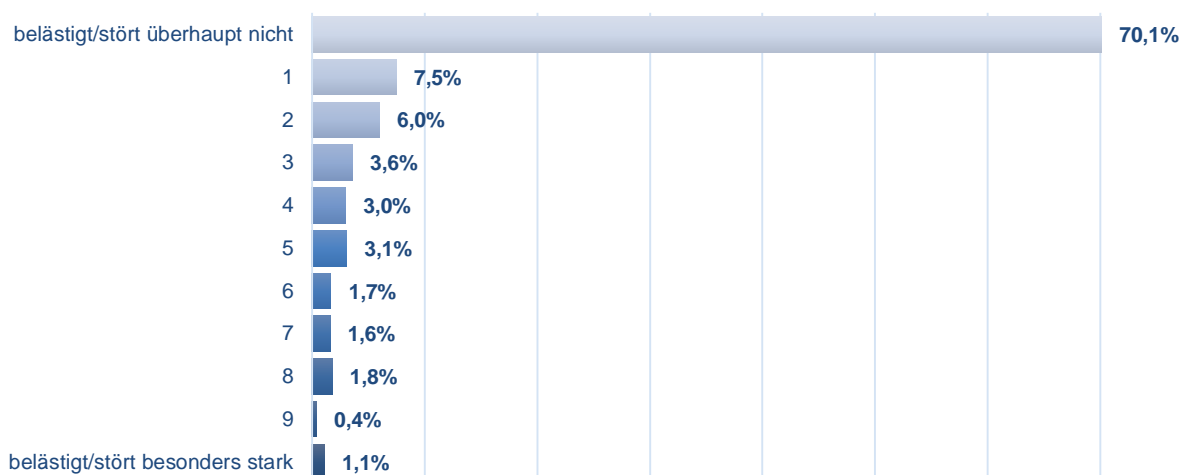

**Tabelle 135: Belästigung durch Erschütterungen gruppiert**

|                        | Häufigkeit | Gültige Prozente | Kumulierte Prozente |
|------------------------|------------|------------------|---------------------|
| Gering belästigt       | 862        | 83,6             | 83,6                |
| Mittelgradig belästigt | 135        | 13,1             | 96,7                |
| Stark belästigt        | 34         | 3,3              | 100,0               |
| Gültig                 |            |                  |                     |
| Gesamt                 | 1031       | 100,0            |                     |

### 9.1. Belästigung durch Erschütterungen und Katastralgemeinden

**Abbildung 172: Belästigung durch Erschütterungen und Katastralgemeinden im Mittelwertvergleich**

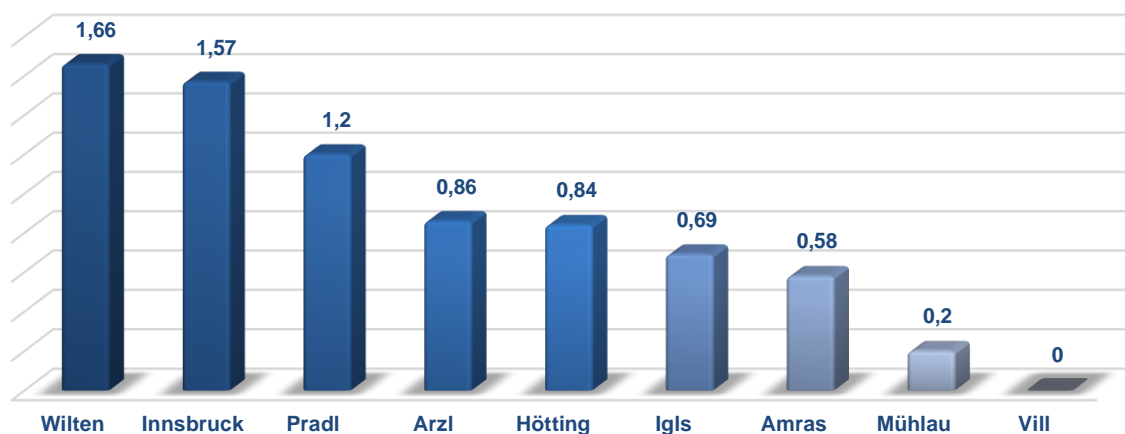

Das größte Ausmaß an Belästigung durch Erschütterungen wird in Wilten und Innsbruck empfunden, das geringste in Vill und Mühlau:

## 9.2. Belästigung durch Erschütterungen und ausgewählte Parameter

Im Folgenden einige ausgewählte Parameter, jeweils in Extremgruppen zusammengefasst, in Zusammenschau mit der Belästigung durch Erschütterungen:

**Tabelle 136: Belästigung durch Erschütterungen und ausgewählte Parameter (gruppiert)**

|                                               |                           | Belästigung Erschütterungen gesamt gruppiert |            |                        |            |                 |            |
|-----------------------------------------------|---------------------------|----------------------------------------------|------------|------------------------|------------|-----------------|------------|
|                                               |                           | Gering belästigt                             |            | Mittelgradig belästigt |            | Stark belästigt |            |
|                                               |                           | Anzahl                                       | Zeilen (%) | Anzahl                 | Zeilen (%) | Anzahl          | Zeilen (%) |
| <b>Geschlecht</b>                             | weiblich                  | 449                                          | 83,0%      | 72                     | 13,3%      | 20              | 3,7%       |
|                                               | männlich                  | 413                                          | 84,3%      | 63                     | 12,9%      | 14              | 2,9%       |
| <b>Altersgruppen</b>                          | 18 bis 40 Jahre           | 370                                          | 84,1%      | 62                     | 14,1%      | 8               | 1,8%       |
|                                               | 41 bis 60 Jahre           | 254                                          | 80,4%      | 44                     | 13,9%      | 18              | 5,7%       |
|                                               | über 60 Jahre             | 238                                          | 86,5%      | 29                     | 10,5%      | 8               | 2,9%       |
| <b>Bildungsschicht</b>                        | Primärer Schulabschluss   | 84                                           | 85,7%      | 11                     | 11,2%      | 3               | 3,1%       |
|                                               | Sekundärer Schulabschluss | 448                                          | 82,7%      | 72                     | 13,3%      | 22              | 4,1%       |
|                                               | Tertiärer Schulabschluss  | 327                                          | 84,3%      | 52                     | 13,4%      | 9               | 2,3%       |
| <b>Haushalt mit/ohne minderjährige Kinder</b> | Haushalt ohne Kinder      | 627                                          | 82,3%      | 110                    | 14,4%      | 25              | 3,3%       |
|                                               | Haushalt mit Kindern      | 235                                          | 87,4%      | 25                     | 9,3%       | 9               | 3,3%       |
| <b>Baulicher Schutz vor Verkehrslärm</b>      | Keiner bis geringfügig    | 629                                          | 82,1%      | 104                    | 13,6%      | 33              | 4,3%       |
|                                               | Gut bis komplett          | 207                                          | 87,7%      | 28                     | 11,9%      | 1               | 0,4%       |
| <b>Innenhof bzw. lärm-abgewandte Seite</b>    | Ja                        | 586                                          | 83,6%      | 98                     | 14,0%      | 17              | 2,4%       |
|                                               | Nein                      | 259                                          | 84,1%      | 32                     | 10,4%      | 17              | 5,5%       |
| <b>Nachtschlaf</b>                            | Fenster geöffnet/gekippt  | 703                                          | 85,6%      | 100                    | 12,2%      | 18              | 2,2%       |
|                                               | Fenster geschlossen       | 153                                          | 75,7%      | 33                     | 16,3%      | 16              | 7,9%       |
| <b>Wohnbedingungen</b>                        | Nicht gut                 | 62                                           | 73,8%      | 17                     | 20,2%      | 5               | 6,0%       |
|                                               | Durchschnittlich          | 449                                          | 80,9%      | 84                     | 15,1%      | 22              | 4,0%       |
|                                               | Sehr gut                  | 349                                          | 89,5%      | 34                     | 8,7%       | 7               | 1,8%       |
| <b>Bedingungen für Kinder</b>                 | Nicht gut                 | 27                                           | 57,4%      | 14                     | 29,8%      | 6               | 12,8%      |
|                                               | Durchschnittlich          | 418                                          | 81,2%      | 77                     | 15,0%      | 20              | 3,9%       |
|                                               | Sehr gut                  | 398                                          | 89,0%      | 42                     | 9,4%       | 7               | 1,6%       |
| <b>Verbundenheit zu Innsbruck</b>             | Nicht verbunden           | 39                                           | 70,9%      | 9                      | 16,4%      | 7               | 12,7%      |
|                                               | Durchschnittlich          | 319                                          | 84,2%      | 51                     | 13,5%      | 9               | 2,4%       |
|                                               | Sehr verbunden            | 502                                          | 84,4%      | 75                     | 12,6%      | 18              | 3,0%       |
| <b>Zufriedenheit eigene Wohnsituation</b>     | Nicht zufrieden           | 16                                           | 57,1%      | 8                      | 28,6%      | 4               | 14,3%      |
|                                               | Durchschnittlich          | 192                                          | 74,4%      | 49                     | 19,0%      | 17              | 6,6%       |
|                                               | Sehr zufrieden            | 653                                          | 87,8%      | 78                     | 10,5%      | 13              | 1,7%       |
| <b>Lebensbedingungen</b>                      | Nicht gut                 | 3                                            | 60,0%      | 2                      | 40,0%      | 0               | 0,0%       |

|                                                                       |                         |     |       |     |       |    |       |
|-----------------------------------------------------------------------|-------------------------|-----|-------|-----|-------|----|-------|
| <b>(Summenscore)</b>                                                  | Durchschnittlich        | 536 | 80,0% | 107 | 16,0% | 27 | 4,0%  |
|                                                                       | Sehr gut                | 323 | 90,7% | 26  | 7,3%  | 7  | 2,0%  |
|                                                                       | Nicht gut               | 4   | 40,0% | 3   | 30,0% | 3  | 30,0% |
| <b>Lebensqualität</b>                                                 | Durchschnittlich        | 219 | 75,5% | 55  | 19,0% | 16 | 5,5%  |
|                                                                       | Sehr gut                | 634 | 87,4% | 76  | 10,5% | 15 | 2,1%  |
|                                                                       | Nicht lärmempfindlich   | 247 | 89,8% | 21  | 7,6%  | 7  | 2,5%  |
| <b>Lärmempfindlichkeit</b>                                            | Durchschnittlich        | 478 | 81,8% | 88  | 15,1% | 18 | 3,1%  |
|                                                                       | Sehr lärmempfindlich    | 137 | 79,7% | 26  | 15,1% | 9  | 5,2%  |
| <b>Summenscore</b>                                                    | Coping ausgeprägt       | 156 | 64,5% | 64  | 26,4% | 22 | 9,1%  |
| <b>Lärmcoping</b>                                                     | Coping nicht ausgeprägt | 706 | 89,6% | 71  | 9,0%  | 11 | 1,4%  |
| <b>Gefühlte Zunahme</b>                                               | Ja                      | 335 | 76,8% | 74  | 17,0% | 27 | 6,2%  |
| <b>Lärmbelastung</b>                                                  | Nein                    | 527 | 88,6% | 61  | 10,3% | 7  | 1,2%  |
| <b>Gefühlte Abnahme</b>                                               | Ja                      | 51  | 87,9% | 7   | 12,1% | 0  | 0,0%  |
| <b>Lärmbelastung</b>                                                  | Nein                    | 811 | 83,4% | 128 | 13,2% | 34 | 3,5%  |
| <b>Notwendigkeit (weiterer) Maßnahmen Lärm</b>                        | Maßnahmen notwendig     | 554 | 80,2% | 109 | 15,8% | 28 | 4,1%  |
|                                                                       | Keine Maßnahmen nötig   | 168 | 87,5% | 20  | 10,4% | 4  | 2,1%  |
| <b>Negative Gesundheitswirkungen Lärm</b>                             | Gering                  | 196 | 90,3% | 18  | 8,3%  | 3  | 1,4%  |
|                                                                       | Stark                   | 635 | 81,3% | 115 | 14,7% | 31 | 4,0%  |
| <b>Lautheit Innsbruck im Vergleich zu anderen Städten Österreichs</b> | Ruhiger                 | 258 | 88,4% | 31  | 10,6% | 3  | 1,0%  |
|                                                                       | Gleich                  | 461 | 83,7% | 70  | 12,7% | 20 | 3,6%  |
|                                                                       | Lauter                  | 129 | 74,1% | 34  | 19,5% | 11 | 6,3%  |

Anm.: In mehreren Subgruppen sind die Fallzahlen für solide Auswertungen zu gering

## 10. Belästigung durch Lärm aus Gewerbe und Industrie

1,5% aller befragten Innsbruckerinnen und Innsbrucker fühlen sich durch den Lärm verursacht von Gewerbe und Industrie stark belästigt, über 90% hingegen nur geringfügig gestört, unter diesen über 80% überhaupt nicht.

Abbildung 173: Belästigung durch Lärm aus Gewerbe und Industrie in Prozent

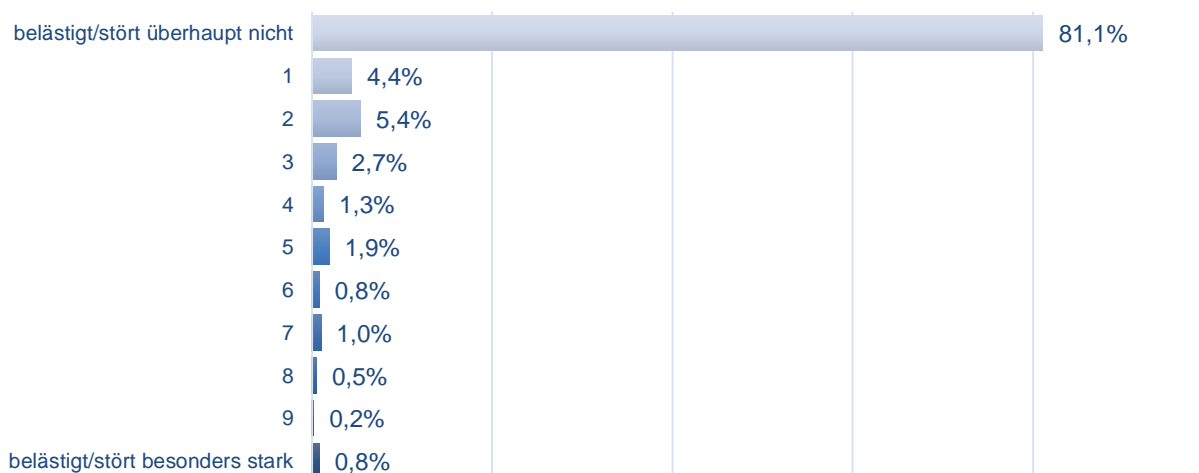



Im Mittel liegen die Antworten der befragten Innsbruckerinnen und Innsbrucker bei 0,63 (6,9%).

**Tabelle 137: Belästigung durch Lärm aus Gewerbe u. Industrie gruppiert**

|                        | Häufigkeit | Gültige Prozente | Kumulierte Prozente |
|------------------------|------------|------------------|---------------------|
| Gering belästigt       | 937        | 90,9             | 90,9                |
| Mittelgradig belästigt | 79         | 7,7              | 98,5                |
| Stark belästigt        | 15         | 1,5              | 100,0               |
| Gesamt                 | 1031       | 100,0            |                     |

### 10.1. Lärmbelästigung Gewerbe und Industrie und Katastralgemeinden

Die Störung durch Lärm von Gewerbe und Industrie ist in Mühlau und Vill am geringsten und in Innsbruck, Wilten und Arzl am stärksten ausgeprägt:

**Abbildung 174: Lärmbelästigung Gewerbe und Industrie und Katastralgemeinden im Mittelwertvergleich**

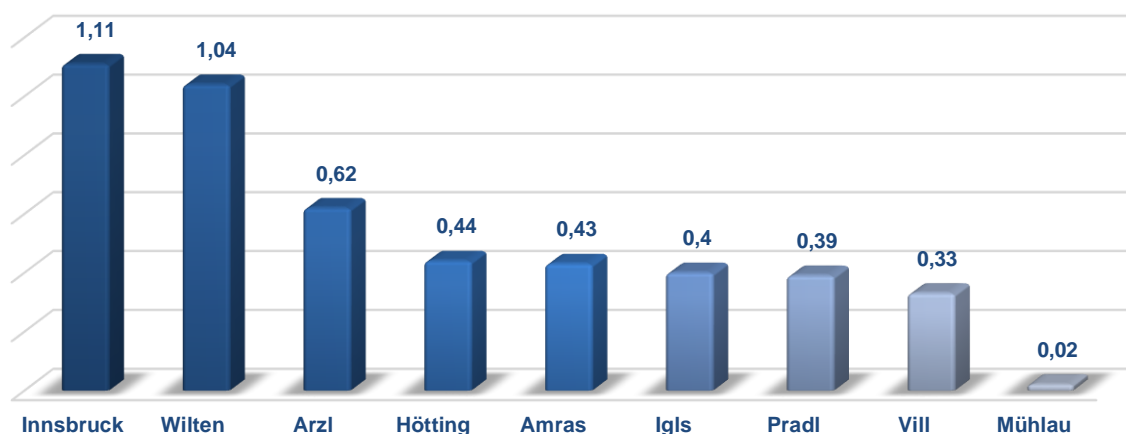

### 10.2. Lärmbelästigung Gewerbe und Industrie und einzelne Parameter

Die Auswertungen zur Belästigung durch den Lärm aus Gewerbe und Industrie zeigen keine Auffälligkeiten im Vergleich zu den anderen Belästigungslärmquellen.

Im Folgenden einige ausgewählte Parameter, jeweils in Extremgruppen zusammengefasst, in Zusammenschau mit der Belästigung durch den Lärm aus Gewerbe und Industrie:

**Tabelle 138: Belästigung durch Lärm aus Gewerbe und Industrie und ausgewählte Parameter**

|                                               |                           | Belästigung Lärm aus Gewerbe u. Industrie gruppiert |            |                        |            |
|-----------------------------------------------|---------------------------|-----------------------------------------------------|------------|------------------------|------------|
|                                               |                           | Gering belästigt                                    |            | Mittelgradig belästigt |            |
|                                               |                           | Anzahl                                              | Zeilen (%) | Anzahl                 | Zeilen (%) |
| <b>Geschlecht</b>                             | weiblich                  | 497                                                 | 91,9%      | 35                     | 6,5%       |
|                                               | männlich                  | 440                                                 | 89,8%      | 44                     | 9,0%       |
| <b>Altersgruppen</b>                          | 18 bis 40 Jahre           | 397                                                 | 90,2%      | 37                     | 8,4%       |
|                                               | 41 bis 60 Jahre           | 286                                                 | 90,5%      | 26                     | 8,2%       |
|                                               | über 60 Jahre             | 254                                                 | 92,4%      | 16                     | 5,8%       |
| <b>Bildungsschicht</b>                        | Primärer Schulabschluss   | 92                                                  | 93,9%      | 4                      | 4,1%       |
|                                               | Sekundärer Schulabschluss | 497                                                 | 91,7%      | 39                     | 7,2%       |
|                                               | Tertiärer Schulabschluss  | 345                                                 | 88,9%      | 36                     | 9,3%       |
| <b>Haushalt mit/ohne minderjährige Kinder</b> | Haushalt ohne Kinder      | 688                                                 | 90,3%      | 63                     | 8,3%       |
|                                               | Haushalt mit Kindern      | 249                                                 | 92,6%      | 16                     | 5,9%       |
| <b>Baulicher Schutz vor Verkehrslärm</b>      | Keiner bis geringfügig    | 686                                                 | 89,6%      | 66                     | 8,6%       |
|                                               | Gut bis komplett          | 223                                                 | 94,5%      | 12                     | 5,1%       |
| <b>Innenhof bzw. lärm-abgewandte Seite</b>    | Ja                        | 645                                                 | 92,0%      | 52                     | 7,4%       |
|                                               | Nein                      | 272                                                 | 88,3%      | 25                     | 8,1%       |
| <b>Nachtschlaf</b>                            | Fenster geöffnet/gekippt  | 754                                                 | 91,8%      | 58                     | 7,1%       |
|                                               | Fenster geschlossen       | 176                                                 | 87,1%      | 20                     | 9,9%       |
| <b>Wohnbedingungen</b>                        | Nicht gut                 | 77                                                  | 91,7%      | 5                      | 6,0%       |
|                                               | Durchschnittlich          | 498                                                 | 89,7%      | 49                     | 8,8%       |
|                                               | Sehr gut                  | 360                                                 | 92,3%      | 25                     | 6,4%       |
| <b>Bedingungen für Kinder</b>                 | Nicht gut                 | 36                                                  | 76,6%      | 10                     | 21,3%      |
|                                               | Durchschnittlich          | 457                                                 | 88,7%      | 46                     | 8,9%       |
|                                               | Sehr gut                  | 424                                                 | 94,9%      | 21                     | 4,7%       |
| <b>Verbundenheit zu Innsbruck</b>             | Nicht verbunden           | 47                                                  | 85,5%      | 6                      | 10,9%      |
|                                               | Durchschnittlich          | 340                                                 | 89,7%      | 33                     | 8,7%       |
|                                               | Sehr verbunden            | 548                                                 | 92,1%      | 40                     | 6,7%       |
| <b>Zufriedenheit eigene Wohnsituation</b>     | Nicht zufrieden           | 21                                                  | 75,0%      | 5                      | 17,9%      |
|                                               | Durchschnittlich          | 219                                                 | 84,9%      | 31                     | 12,0%      |
|                                               | Sehr zufrieden            | 696                                                 | 93,5%      | 43                     | 5,8%       |
| <b>Lebensbedingungen (Summenscore)</b>        | Nicht gut                 | 4                                                   | 80,0%      | 0                      | 0,0%       |
|                                               | Durchschnittlich          | 597                                                 | 89,1%      | 61                     | 9,1%       |
|                                               | Sehr gut                  | 336                                                 | 94,4%      | 18                     | 5,1%       |
| <b>Lebensqualität</b>                         | Nicht gut                 | 8                                                   | 80,0%      | 1                      | 10,0%      |
|                                               | Durchschnittlich          | 252                                                 | 86,9%      | 35                     | 12,1%      |
|                                               | Sehr gut                  | 671                                                 | 92,6%      | 43                     | 5,9%       |
| <b>Lärmempfindlichkeit</b>                    | Nicht lärmempfindlich     | 263                                                 | 95,6%      | 11                     | 4,0%       |
|                                               | Durchschnittlich          | 524                                                 | 89,7%      | 49                     | 8,4%       |
|                                               | Sehr lärmempfindlich      | 150                                                 | 87,2%      | 19                     | 11,0%      |
| <b>Summenscore</b>                            | Coping ausgeprägt         | 189                                                 | 78,1%      | 41                     | 16,9%      |
| <b>Lärmcoping</b>                             | Coping nicht ausgeprägt   | 747                                                 | 94,8%      | 38                     | 4,8%       |

|                                                                       |                       |     |       |    |       |
|-----------------------------------------------------------------------|-----------------------|-----|-------|----|-------|
| <b>Gefühlte Zunahme</b>                                               | Ja                    | 376 | 86,2% | 48 | 11,0% |
| <b>Lärmbelastung</b>                                                  | Nein                  | 561 | 94,3% | 31 | 5,2%  |
| <b>Gefühlte Abnahme</b>                                               | Ja                    | 57  | 98,3% | 1  | 1,7%  |
| <b>Lärmbelastung</b>                                                  | Nein                  | 880 | 90,4% | 78 | 8,0%  |
| <b>Notwendigkeit (weiterer) Maßnahmen Lärm</b>                        | Maßnahmen notwendig   | 615 | 89,0% | 62 | 9,0%  |
|                                                                       | Keine Maßnahmen nötig | 182 | 94,8% | 10 | 5,2%  |
| <b>Negative Gesundheitswirkungen Lärm</b>                             | Gering                | 207 | 95,4% | 10 | 4,6%  |
|                                                                       | Stark                 | 698 | 89,4% | 68 | 8,7%  |
| <b>Lautheit Innsbruck im Vergleich zu anderen Städten Österreichs</b> | Ruhiger               | 274 | 93,8% | 14 | 4,8%  |
|                                                                       | Gleich                | 501 | 90,9% | 42 | 7,6%  |
|                                                                       | Lauter                | 148 | 85,1% | 23 | 13,2% |
| <b>Einschätzung eigener Lärmbeitrag</b>                               | Gering                | 712 | 91,9% | 54 | 7,0%  |
|                                                                       | Durchschnittlich      | 201 | 88,5% | 22 | 9,7%  |
|                                                                       | Groß                  | 24  | 82,8% | 3  | 10,3% |

Anm.: Die Fallzahlen in der Extremgruppe der Starkbelästigten (highly annoyed, N=15) sind für solide Auswertungen zu gering, weshalb diese Gruppe in der obenstehenden Tabelle ausgespart wurde.

## 11. Belästigung durch Autobahnlärm

Die Belästigung durch Autobahnlärm im urbanen Stadtgebiet von Innsbruck fällt im befragten Kollektiv vergleichsweise gering aus und nimmt unter allen 10 abgefragten Lärmquellen die geringsten Ausprägungen an. 2,1% empfinden sich als stark belästigt (*highly annoyed*: gruppierte Antwortkategorien 8, 9 und 10 [=belästigt / stört besonders stark]), 91,9% hingegen als *überhaupt nicht belästigt* (82,3%) bis gering vom Autobahnlärm gestört (gruppierte Antwortkategorien 0 [=belästigt / stört überhaupt nicht], 1 und 2). Im Mittel liegen die Antworten der befragten Probandinnen und Probanden bei 0,6 (6,6%):

**Abbildung 175: Belästigung durch Autobahnlärm in Prozent**

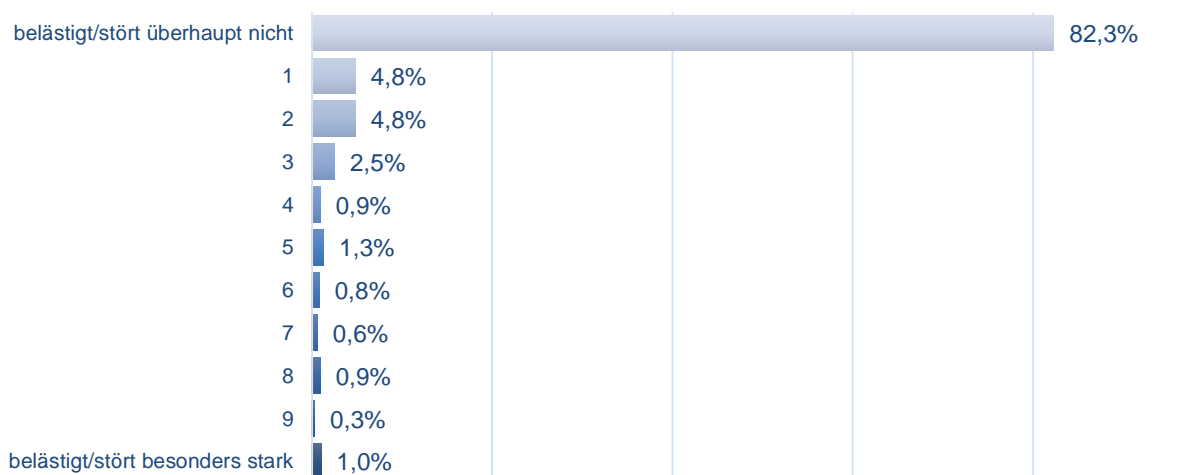

**Tabelle 139: Belästigung durch Autobahnlärm gruppiert**

|                        | Häufigkeit | Gültige Prozente | Kumulierte Prozente |
|------------------------|------------|------------------|---------------------|
| Gering belästigt       | 947        | 91,9             | 91,9                |
| Mittelgradig belästigt | 62         | 6,0              | 97,9                |
| Stark belästigt        | 22         | 2,1              | 100,0               |
| Gesamt                 | 1031       | 100,0            |                     |

### 11.1. Autobahnlärmbelästigung, -Belastung und -Expositionsempfinden

Auch in der Zusammenschau der Belästigung durch Autobahnlärm mit der gegebenen Autobahnlärmbelastung zeigt sich ein deutlicher Zusammenhang. Das Ausmaß der empfundenen Störung durch den Autobahnlärm deckt sich dabei nahezu 1:1 mit der empfundenen Ausgesetzttheit.

Sehr ähnlich dem Bezug zum Straßenverkehrslärm ist das Belästigungsausmaß im niederen Belastungsbereich sehr gering und steigt bei höheren gegebenen Lärmpegeln über 50dB  $L_{den}$  stark an:

**Abbildung 176: Autobahnlärmbelästigung und –Expositionsempfinden und 24h-Autobahnlärmbelastung  $L_{den}$  in 10dB-Schritten im Mittelwertvergleich**

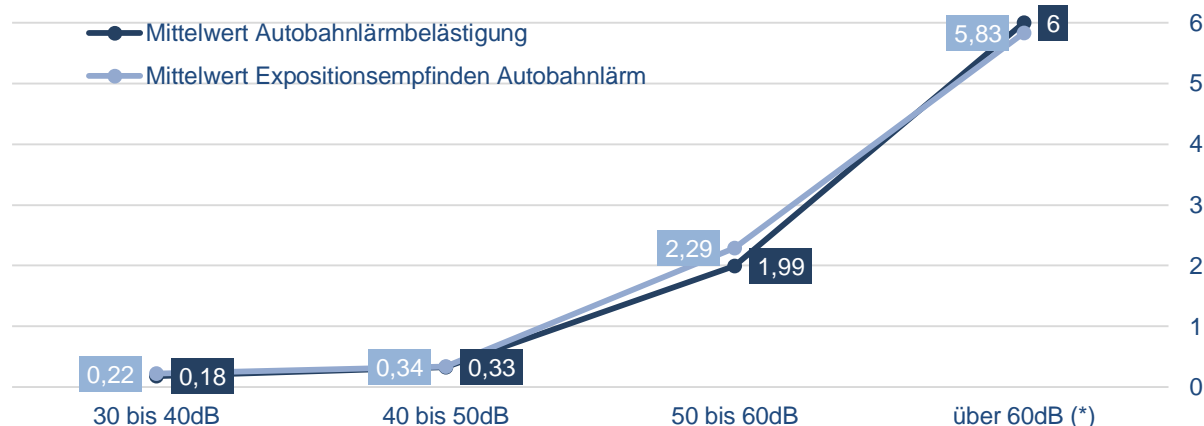

(\*) N umfasst in dieser Belastungskategorie lediglich 6 befragte Personen

Anm.: Die Darstellung zeigt nachvollziehbare Zusammenhänge auf, enthält jedoch keine Prüfungen auf Kovariablen und andere Prädiktoren und ist somit nicht den Dosis-Wirkungskurven aus der gängigen Fachliteratur gleichzusetzen.

### 11.2. Belästigung durch Autobahnlärm und Katastralgemeinden

Die im Mittel stärkste Belästigung durch Autobahnlärm zeigt sich in Wilten, gefolgt von Vill. Die geringste Störung durch Autobahnlärm im eigenen Wohnumfeld empfinden die Befragten in der Innenstadt (Katastralgemeinde Innsbruck), sowie in Igls, Pradl und Mühlau:

Abbildung 177: Belästigung durch Autobahnlärm und Katastralgemeinden im Mittelwertvergleich

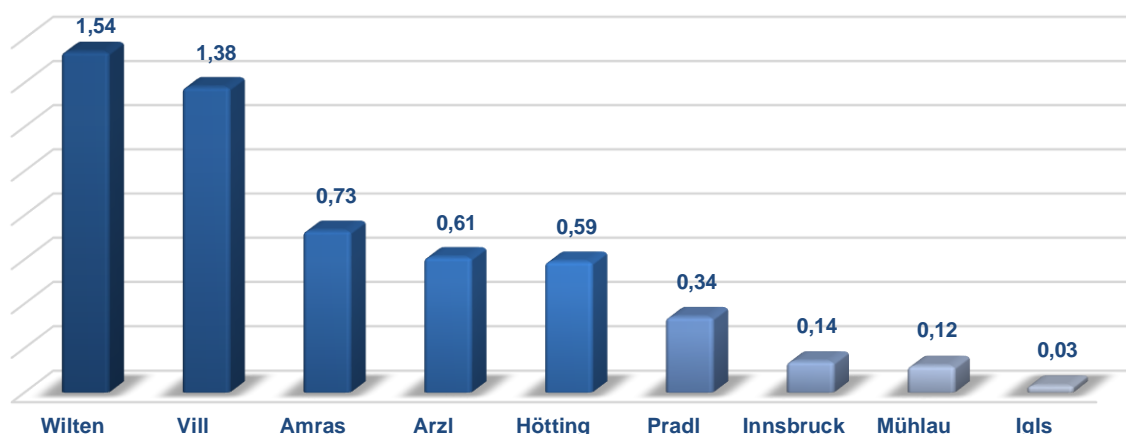

### 11.3. Belästigung durch Autobahnlärm und ausgewählte Parameter

Die Auswertungen zur Belästigung durch Autobahnlärm zeigen keine Auffälligkeiten im Vergleich zu den anderen Belästigungslärmquellen. Allerdings sind die Fallzahlen der Mittel- und Starkbelasteten sehr gering, weshalb die Aussagekraft der Extremgruppenvergleiche eingeschränkt ist. Besonders in der Extremgruppe der Starkbelasteten (*highly annoyed*, N=22) sind zu wenige Fälle für solide Auswertungen enthalten, weshalb diese Gruppe in der untenstehenden Tabelle ganz ausgespart wurde.

Im Folgenden einige ausgewählte Parameter, jeweils in die beiden Gruppen der gering und der mittelgradig Belasteten zusammengefasst, in Zusammenschau mit der Belästigung durch Autobahnlärm:

Tabelle 140: Belästigung durch Autobahnlärm und ausgewählte Parameter (gruppiert)

|                                                |                           | Belästigung Autobahnlärm gruppiert |            |                        |            |
|------------------------------------------------|---------------------------|------------------------------------|------------|------------------------|------------|
|                                                |                           | Gering belästigt                   |            | Mittelgradig belästigt |            |
|                                                |                           | Anzahl                             | Zeilen (%) | Anzahl                 | Zeilen (%) |
| <b>Geschlecht</b>                              | weiblich                  | 495                                | 91,5%      | 31                     | 5,7%       |
|                                                | männlich                  | 452                                | 92,2%      | 31                     | 6,3%       |
| <b>Altersgruppen</b>                           | 18 bis 40 Jahre           | 409                                | 93,0%      | 24                     | 5,5%       |
|                                                | 41 bis 60 Jahre           | 287                                | 90,8%      | 19                     | 6,0%       |
|                                                | über 60 Jahre             | 251                                | 91,3%      | 19                     | 6,9%       |
| <b>Bildungsschicht</b>                         | Primärer Schulabschluss   | 92                                 | 93,9%      | 4                      | 4,1%       |
|                                                | Sekundärer Schulabschluss | 494                                | 91,1%      | 38                     | 7,0%       |
|                                                | Tertiärer Schulabschluss  | 358                                | 92,3%      | 20                     | 5,2%       |
| <b>Haushalt mit/ohne minder-jährige Kinder</b> | Haushalt ohne Kinder      | 702                                | 92,1%      | 49                     | 6,4%       |
|                                                | Haushalt mit Kindern      | 245                                | 91,1%      | 13                     | 4,8%       |
| <b>Baulicher Schutz vor Verkehrs-lärm</b>      | Keiner bis geringfügig    | 694                                | 90,6%      | 53                     | 6,9%       |
|                                                | Gut bis komplett          | 226                                | 95,8%      | 8                      | 3,4%       |
| <b>Innenhof bzw. lärmabge-wandte Seite</b>     | Ja                        | 659                                | 94,0%      | 33                     | 4,7%       |
|                                                | Nein                      | 268                                | 87,0%      | 29                     | 9,4%       |
| <b>Nachtschlaf</b>                             | Fenster geöffnet/gekippt  | 754                                | 91,8%      | 50                     | 6,1%       |

|                                                                       |                         |     |       |       |       |
|-----------------------------------------------------------------------|-------------------------|-----|-------|-------|-------|
|                                                                       | Fenster geschlossen     | 186 | 92,1% | 12    | 5,9%  |
| <b>Wohnbedingungen</b>                                                | Nicht gut               | 74  | 88,1% | 6     | 7,1%  |
|                                                                       | Durchschnittlich        | 507 | 91,4% | 38    | 6,8%  |
|                                                                       | Sehr gut                | 364 | 93,3% | 18    | 4,6%  |
| <b>Bedingungen für Kinder</b>                                         | Nicht gut               | 41  | 87,2% | 4     | 8,5%  |
|                                                                       | Durchschnittlich        | 461 | 89,5% | 41    | 8,0%  |
|                                                                       | Sehr gut                | 424 | 94,9% | 16    | 3,6%  |
| <b>Verbundenheit zu Innsbruck</b>                                     | Nicht verbunden         | 51  | 92,7% | 2     | 3,6%  |
|                                                                       | Durchschnittlich        | 349 | 92,1% | 23    | 6,1%  |
|                                                                       | Sehr verbunden          | 545 | 91,6% | 37    | 6,2%  |
| <b>Zufriedenheit eigene Wohnsituation</b>                             | Nicht zufrieden         | 22  | 78,6% | 4     | 14,3% |
|                                                                       | Durchschnittlich        | 236 | 91,5% | 17    | 6,6%  |
|                                                                       | Sehr zufrieden          | 688 | 92,5% | 41    | 5,5%  |
| <b>Lebensbedingungen (Summenscore)</b>                                | Nicht gut (*)           | 3   | 60,0% | 1     | 20,0% |
|                                                                       | Durchschnittlich        | 608 | 90,7% | 48    | 7,2%  |
|                                                                       | Sehr gut                | 336 | 94,4% | 13    | 3,7%  |
| <b>Lebensqualität</b>                                                 | Nicht gut               | 8   | 80,0% | 2 (*) | 20,0% |
|                                                                       | Durchschnittlich        | 260 | 89,7% | 23    | 7,9%  |
|                                                                       | Sehr gut                | 673 | 92,8% | 37    | 5,1%  |
| <b>Lärmempfindlichkeit</b>                                            | Nicht lärmempfindlich   | 261 | 94,9% | 10    | 3,6%  |
|                                                                       | Durchschnittlich        | 533 | 91,3% | 39    | 6,7%  |
|                                                                       | Sehr lärmempfindlich    | 153 | 89,0% | 13    | 7,6%  |
| <b>Summenscore Lärmcoping</b>                                         | Coping ausgeprägt       | 209 | 86,4% | 20    | 8,3%  |
|                                                                       | Coping nicht ausgeprägt | 737 | 93,5% | 42    | 5,3%  |
| <b>Gefühlte Zunahme Lärmbelastung</b>                                 | Ja                      | 389 | 89,2% | 32    | 7,3%  |
|                                                                       | Nein                    | 558 | 93,8% | 30    | 5,0%  |
| <b>Gefühlte Abnahme Lärmbelastung</b>                                 | Ja                      | 55  | 94,8% | 2 (*) | 3,4%  |
|                                                                       | Nein                    | 892 | 91,7% | 60    | 6,2%  |
| <b>Notwendigkeit (weiterer) Maßnahmen Lärm</b>                        | Maßnahmen notwendig     | 623 | 90,2% | 49    | 7,1%  |
|                                                                       | Keine Maßnahmen nötig   | 181 | 94,3% | 8     | 4,2%  |
| <b>Negative Gesundheitswirkungen Lärm</b>                             | Gering                  | 203 | 93,5% | 10    | 4,6%  |
|                                                                       | Stark                   | 714 | 91,4% | 50    | 6,4%  |
| <b>Lautheit Innsbruck im Vergleich zu anderen Städten Österreichs</b> | Ruhiger                 | 272 | 93,2% | 16    | 5,5%  |
|                                                                       | Gleich                  | 511 | 92,7% | 33    | 6,0%  |
|                                                                       | Lauter                  | 151 | 86,8% | 12    | 6,9%  |
| <b>Einschätzung eigener Lärmbeitrag</b>                               | Gering                  | 720 | 92,9% | 39    | 5,0%  |
|                                                                       | Durchschnittlich        | 203 | 89,4% | 19    | 8,4%  |
|                                                                       | Groß                    | 24  | 82,8% | 4 (*) | 13,8% |

(\*) zu kleine Fallzahlen für solide Auswertungen

## Belästigung / Störung durch Lärm im Schlaf

### 1. Überblick Belästigung / Störung durch Lärm im Schlaf

#### 1.1. Belästigung im Schlaf nach Lärmquelle

Die Einschätzung der Belästigung / Störung durch Lärm im Schlaf wurde für jede einzelne Lärmquelle mittels einer 11-teiligen Skala von 0=*belästigt / stört überhaupt nicht* bis 10=*belästigt / stört besonders stark* abgefragt.

Im Mittelwertvergleich der einzelnen Quellen verändert sich das Bild der Belästigungsreaktion auf Lärm im Schlaf im Vergleich zur Belästigungsausprägung auf Lärm im 24h-Zeitraum: Zunächst ist festzuhalten, dass sich das Ausmaß der Belästigung im Nachtzeitraum etwa halbiert. Des Weiteren rückt der Straßenverkehrslärm an die erste Stelle als störendste Lärmquelle, gefolgt vom verursachten Lärm durch Passanten und Gaststätten und dem Nachbarschaftslärm:

**Abbildung 178: Mittelwertvergleich der Belästigung im Schlaf nach Quelle**

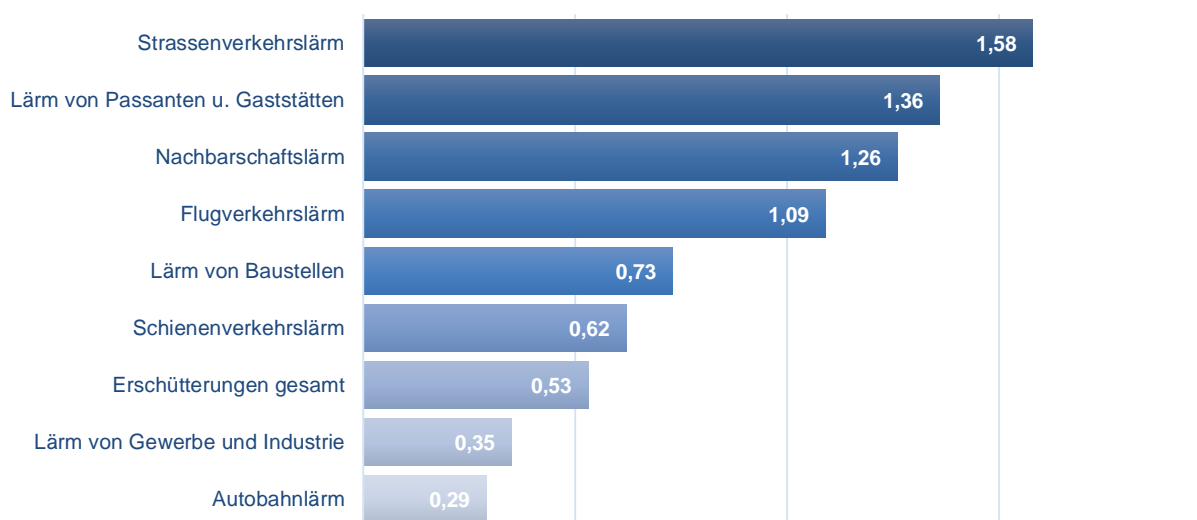

Der Flugverkehrslärm fällt an die vierte Stelle, der Baustellenlärm an die fünfte Stelle zurück. Erschütterungen, Lärm von Gewerbe und Industrie und Autobahnlärm verbleiben in dieser Reihenfolge auf den Plätzen, der am wenigsten belästigendsten (Lärm-)Quellen.<sup>13</sup> Der Mittelwert aller Antworten über alle 9 Fragen hinweg liegt bei 0,87 (9,5%):

**Tabelle 141: Mittelwerte der Belästigung im Schlaf nach Quelle**

|                          | Strassen-<br>verkehr | Passanten u.<br>Gaststätten | Nach-<br>barschaft | Flug-<br>verkehr | Bau-<br>stellen | Schienen-<br>verkehr | Erschüt-<br>terungen | Gewerbe<br>u. Industrie | Auto-<br>bahn |
|--------------------------|----------------------|-----------------------------|--------------------|------------------|-----------------|----------------------|----------------------|-------------------------|---------------|
| Mittelwert               | 1,58                 | 1,36                        | 1,26               | 1,09             | ,73             | ,62                  | ,53                  | ,35                     | ,29           |
| N                        | 1031                 | 1031                        | 1031               | 1031             | 1030            | 1031                 | 1031                 | 1031                    | 1031          |
| Standard-<br>abweichung  | 2,519                | 2,475                       | 2,337              | 2,232            | 1,914           | 1,725                | 1,523                | 1,348                   | 1,238         |
| Standardfehler<br>des MW | ,078                 | ,077                        | ,073               | ,070             | ,060            | ,054                 | ,047                 | ,042                    | ,039          |

<sup>13</sup> Anm.: Die eigenständige Frage nach der Belästigung / Störung durch *Lärm im Schlaf insgesamt* wird in den folgenden vergleichenden Zusammenstellungen der einzelnen Lärmquellen ausgeklammert und im anschließenden Unterkapitel dargestellt.

Kategorisiert in 3 Belästigungsgruppen:

- **gering belästigt:** gruppierte Antwortkategorien 0 [=belästigt / stört überhaupt nicht]), 1 und 2
- **mittelgradig belästigt:** gruppierte Antwortkategorien 3 bis 7
- **stark belästigt (highly annoyed sleep):** gruppierte Antwortkategorien 8, 9 und 10 [=belästigt / stört besonders stark])

stellt sich die Belästigungsreaktion im Schlaf nach Quelle wie folgt dar:

**Abbildung 179: Belästigung im Schlaf nach Quelle kategorisiert in 3 Expositionsgruppen in Prozent**

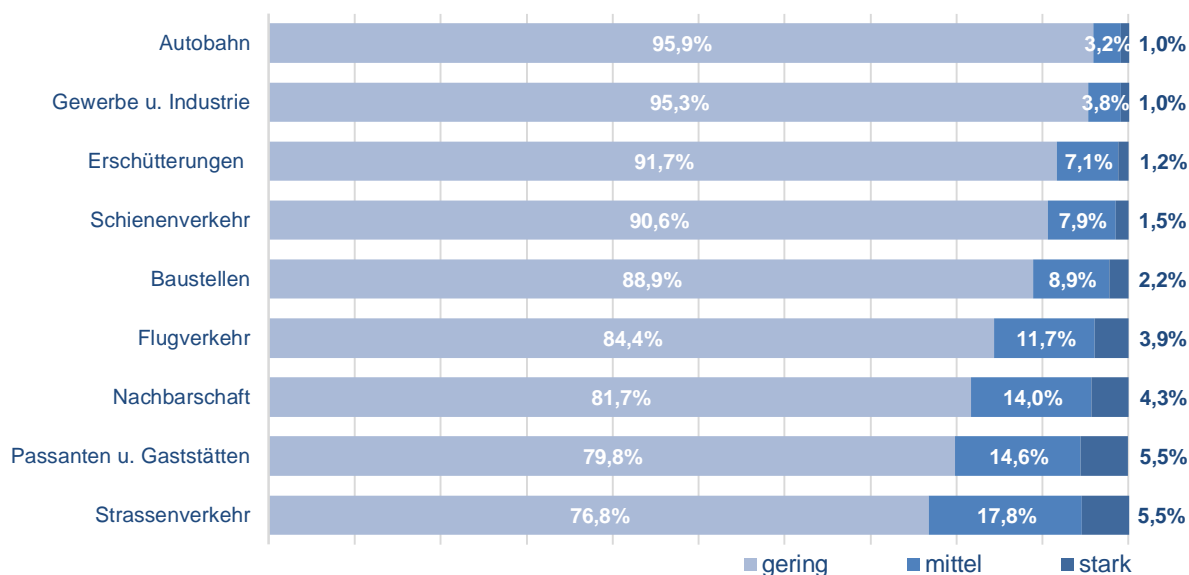

\* Nach Belästigungsausmaß (Mittelwert) aufsteigend sortiert

Wird nur die Extremgruppe der sich im Schlaf stark belästigt fühlenden Befragten (*highly annoyed sleep*) betrachtet, zeigt sich im Vergleich der Quellen dasselbe Bild, wobei sich die Belästigungsreaktionen auf den Lärm von Passanten und Gaststätten und auf den Straßenverkehrslärm ebenso die Waage halten, wie die Ausprägung der Extremgruppen in Bezug auf den Autobahnlärm und den Lärm von Gewerbe und Industrie:

**Abbildung 180: Extremgruppenvergleich *highly annoyed sleep* nach Quelle in Prozent**

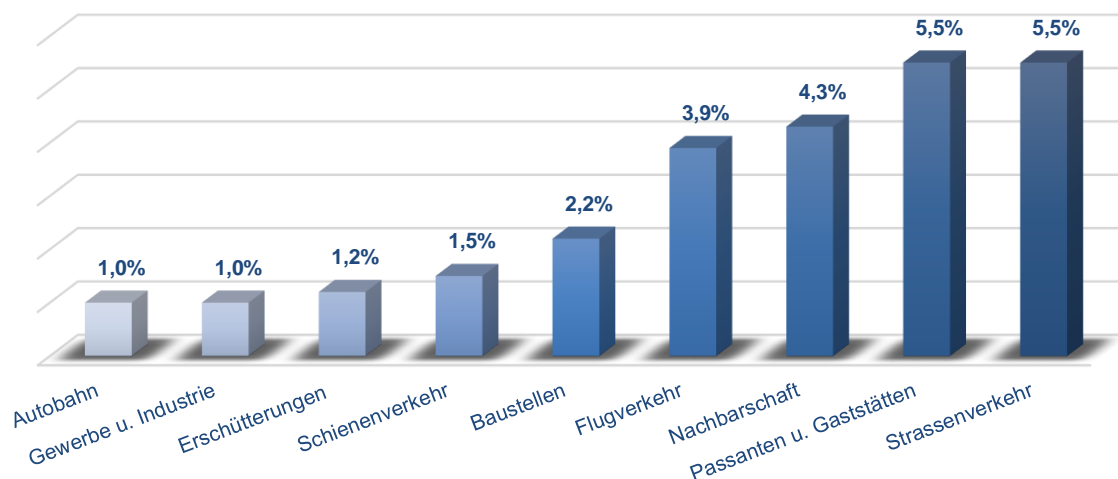

\* Nach Belästigungsausmaß (Häufigkeit) aufsteigend sortiert



## 1.2. Belästigung im Schlaf und Verkehrslärmbelastung

Das Ausmaß der Belästigung durch Verkehrslärm zeigt auch für den Nachtzeitraum (22h bis 6h) einen starken Zusammenhang zur gegebenen Lärmbelastung: Je höher die Verkehrslärmbelastung, desto höher die Belästigung. Die Unterschiede zwischen den drei Verkehrslärmquellen Straße – Schiene – Flugverkehr nivellieren sich jedoch.

Aufgrund der geringeren Flugverkehrslärmbelastung der Innsbruckerinnen und Innsbrucker in der Nacht ist dieser im gruppierten Vergleich nur für die Geringbelasteten <45dB sinnvoll heranzuziehen, nimmt in dieser Belastungsgruppe aber auch in den Nachtstunden den Platz als störendste Lärmquelle ein. Die im Schlaf störendste Verkehrslärmquelle insgesamt ist der Straßenverkehr. Der für den 24h-Zeitraum deutliche Abstand zum Belästigungsausmaß des Schienenverkehrs verringert sich:

**Abbildung 181: Belästigung im Schlaf und Verkehrslärmbelastung nach Quelle Nachtlärmpegel ( $L_n$ ) gruppiert im Mittelwertvergleich**

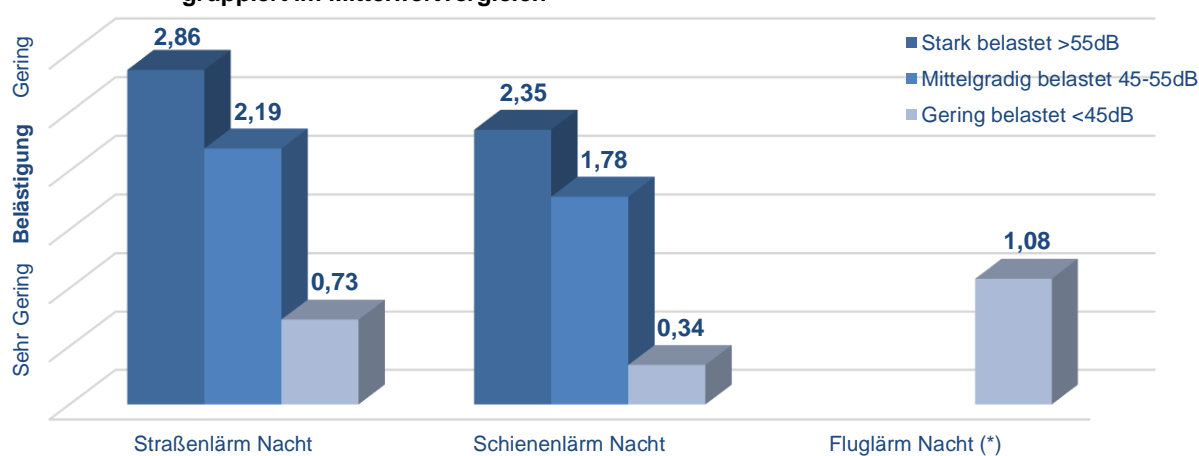

(\*) Keine stark Fluglärmbelasteten in der Nacht, lediglich 4 mittelgradig Fluglärmbelastete

Im Vergleich des gemittelten Belästigungsausmaßes im Schlaf nach vorhandener Lärmbelastung in 10dB-Schritten (Nachtlärmpegel  $L_n$ ) nach Verkehrslärmquelle zeigt sich erneut das höhere Belästigungsausmaß des Flugverkehrslärms gegenüber dem Straßen- und Schienenverkehrslärm:

**Abbildung 182: Belästigung im Schlaf und Verkehrslärmbelastung nach Quelle Nachtlärmpegel ( $L_n$ ) in 10dB-Schritten im Mittelwertvergleich**

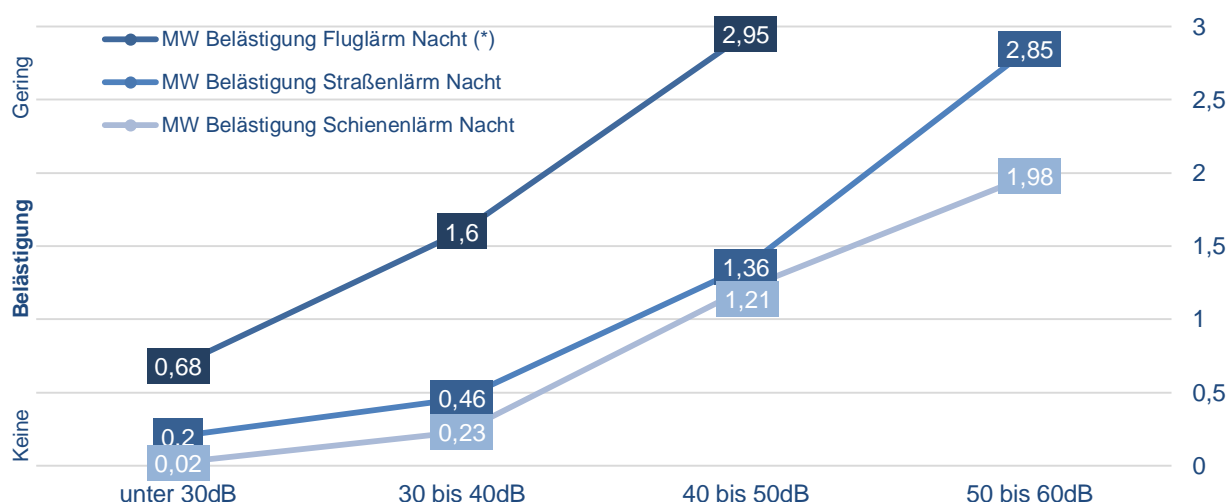

Die Darstellung zeigt nachvollziehbare Zusammenhänge auf, enthält jedoch keine Prüfungen auf Kovariablen und andere Prädiktoren und ist somit nicht den Dosis-Wirkungskurven aus der gängigen Fachliteratur gleichzusetzen.

Weiters ist erkennbar, dass die Belästigungsreaktion sich bereits bei deutlich niedrigeren Lärmpegeln zu verstärken beginnt und kontinuierlicher ansteigt als in Zusammenschau mit den 24h-Pegeln. Ein „Schwellenwert“ ab dem eine gesteigerte Belästigung / Störung durch den Verkehrslärm eintritt, ist für die Belästigung im Schlaf nicht auf den ersten Blick auszumachen.

### 1.3. Belästigung im Schlaf und Katastralgemeinden

#### 1.3.1. Belästigung im Schlaf nach Quelle und Katastralgemeinden

Insgesamt am stärksten im Schlaf vom Lärm belästigt / gestört zeigen sich die Befragten in Wilten und Innsbruck mit deutlichem Abstand gefolgt von Pradl und Hötting. In der Summe aller Lärmquellen am geringsten belästigt empfinden sich die Bewohnerinnen und Bewohner von Igls, Vill und Mühlau:

**Abbildung 183: Belästigung im Schlaf nach Lärmquelle und Katastralgemeinde im Mittelwertvergleich**

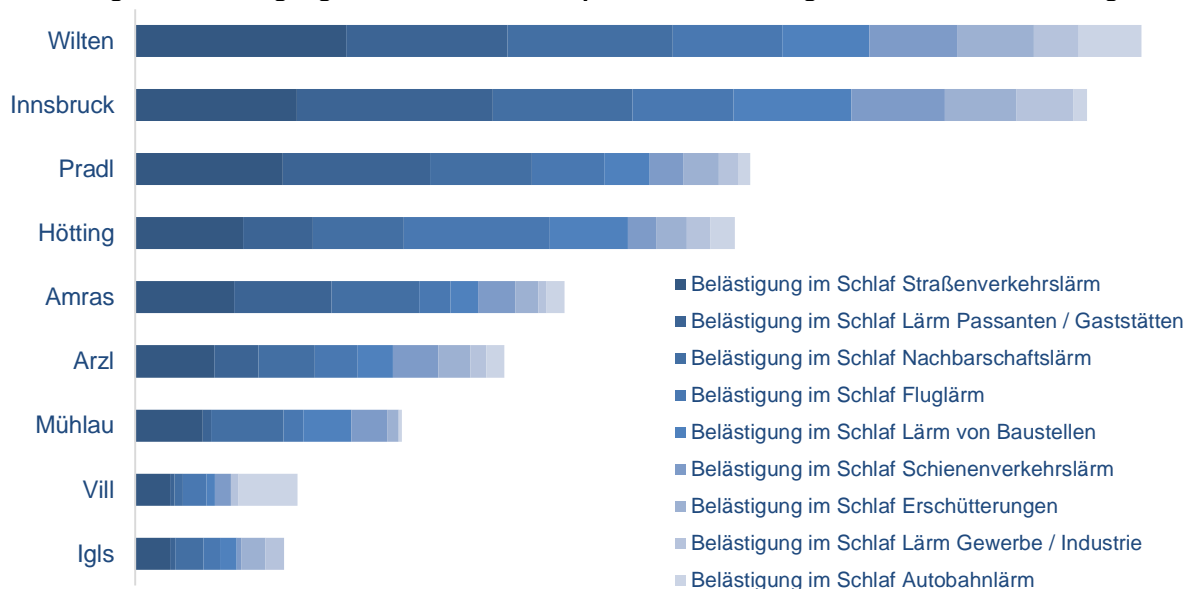

\* Nach Belästigungsausmaß (Häufigkeit) absteigend sortiert

**Tabelle 142: Belästigung im Schlaf nach Lärmquelle und Katastralgemeinde im Mittelwertvergleich**

| Belästigung im Schlaf durch Lärm ausgehend von |    |        |                            |                    |       |                 |         |                      |                        |               |
|------------------------------------------------|----|--------|----------------------------|--------------------|-------|-----------------|---------|----------------------|------------------------|---------------|
| Katastralge-<br>meinde                         |    | Straße | Passanten /<br>Gaststätten | Nachbar-<br>schaft | Flug  | Bau-<br>stellen | Schiene | Erschüt-<br>terungen | Gewerbe /<br>Industrie | Auto-<br>bahn |
| Amras                                          | MW | 1,20   | 1,18                       | 1,07               | ,38   | ,33             | ,45     | ,28                  | ,10                    | ,22           |
|                                                | N  | 60     | 60                         | 60                 | 60    | 60              | 60      | 60                   | 60                     | 60            |
|                                                | SA | 2,413  | 2,274                      | 2,462              | 1,342 | 1,020           | 1,799   | 1,303                | ,440                   | ,993          |
| Arzl                                           | MW | ,96    | ,54                        | ,68                | ,52   | ,43             | ,55     | ,39                  | ,19                    | ,22           |
|                                                | N  | 102    | 102                        | 102                | 102   | 102             | 102     | 102                  | 102                    | 102           |
|                                                | SA | 1,934  | 1,615                      | 1,549              | 1,233 | 1,583           | 1,633   | 1,365                | ,909                   | 1,021         |
| Hötting                                        | MW | 1,31   | ,85                        | 1,10               | 1,77  | ,95             | ,34     | ,37                  | ,29                    | ,29           |

|                  |           |             |             |             |             |             |             |            |            |            |
|------------------|-----------|-------------|-------------|-------------|-------------|-------------|-------------|------------|------------|------------|
|                  | N         | 243         | 243         | 243         | 243         | 243         | 243         | 243        | 243        | 243        |
|                  | SA        | 2,434       | 2,058       | 2,167       | 2,913       | 6,550       | 1,365       | 1,343      | 1,403      | 1,206      |
|                  | <b>MW</b> | <b>,43</b>  | <b>,06</b>  | <b>,34</b>  | <b>,20</b>  | <b>,20</b>  | <b>,06</b>  | <b>,29</b> | <b>,23</b> | <b>,00</b> |
| <b>Igls</b>      | N         | 35          | 35          | 35          | 35          | 35          | 35          | 35         | 35         | 35         |
|                  | SA        | ,778        | ,236        | ,838        | ,632        | ,473        | ,338        | ,860       | 1,031      | ,000       |
|                  | <b>MW</b> | <b>1,96</b> | <b>2,38</b> | <b>1,69</b> | <b>1,23</b> | <b>1,43</b> | <b>1,13</b> | <b>,87</b> | <b>,69</b> | <b>,16</b> |
| <b>Innsbruck</b> | N         | 176         | 176         | 176         | 176         | 176         | 176         | 176        | 176        | 176        |
|                  | SA        | 2,619       | 3,040       | 2,479       | 2,337       | 2,551       | 2,268       | 1,779      | 1,830      | 1,078      |
|                  | <b>MW</b> | <b>,82</b>  | <b>,10</b>  | <b>,88</b>  | <b>,24</b>  | <b>,58</b>  | <b>,44</b>  | <b>,14</b> | <b>,00</b> | <b>,04</b> |
| <b>Mühlau</b>    | N         | 50          | 50          | 50          | 50          | 50          | 50          | 50         | 50         | 50         |
|                  | SA        | 1,987       | ,416        | 2,017       | ,797        | 1,774       | 1,593       | ,756       | ,000       | ,283       |
|                  | <b>MW</b> | <b>1,79</b> | <b>1,79</b> | <b>1,23</b> | <b>,88</b>  | <b>,55</b>  | <b>,41</b>  | <b>,43</b> | <b>,24</b> | <b>,14</b> |
| <b>Pradl</b>     | N         | 188         | 188         | 188         | 188         | 188         | 188         | 188        | 188        | 188        |
|                  | SA        | 2,745       | 2,618       | 2,305       | 1,833       | 1,633       | 1,347       | 1,357      | 1,157      | ,860       |
|                  | <b>MW</b> | <b>,43</b>  | <b>,05</b>  | <b>,10</b>  | <b>,29</b>  | <b>,10</b>  | <b>,19</b>  | <b>,00</b> | <b>,10</b> | <b>,71</b> |
| <b>Vill</b>      | N         | 21          | 21          | 21          | 21          | 21          | 21          | 21         | 21         | 21         |
|                  | SA        | ,870        | ,218        | ,436        | 1,102       | ,436        | ,873        | ,000       | ,436       | 2,101      |
|                  | <b>MW</b> | <b>2,56</b> | <b>1,96</b> | <b>2,00</b> | <b>1,33</b> | <b>1,05</b> | <b>1,07</b> | <b>,93</b> | <b>,54</b> | <b>,76</b> |
| <b>Wilten</b>    | N         | 156         | 156         | 156         | 156         | 156         | 156         | 156        | 156        | 156        |
|                  | SA        | 2,771       | 2,809       | 2,969       | 2,397       | 2,225       | 2,042       | 2,029      | 1,567      | 1,928      |
|                  | <b>MW</b> | <b>1,58</b> | <b>1,36</b> | <b>1,26</b> | <b>1,09</b> | <b>,83</b>  | <b>,62</b>  | <b>,53</b> | <b>,35</b> | <b>,29</b> |
| <b>Gesamt</b>    | N         | 1031        | 1031        | 1031        | 1031        | 1031        | 1031        | 1031       | 1031       | 1031       |
|                  | SA        | 2,519       | 2,475       | 2,337       | 2,232       | 3,609       | 1,725       | 1,523      | 1,348      | 1,238      |

### 1.3.2. Verkehrslärmbelästigung im Schlaf und Katastralgemeinden

Abbildung 184: Belästigung im Schlaf nach Verkehrslärmquelle und Katastralgemeinde im Mittelwertvergleich

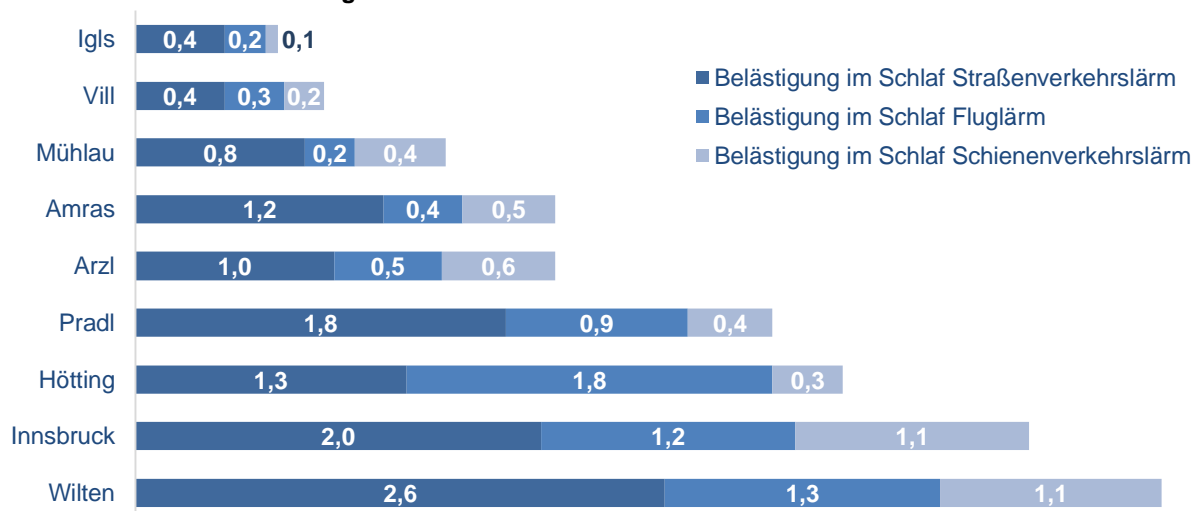

\* Nach Belästigungsausmaß (Häufigkeit) aufsteigend sortiert

Das Ranking der Katastralgemeinden bezogen auf das Ausmaß der reinen Verkehrslärmbelästigung im Schlaf fällt beinahe ident dem Ranking der Lärmbelästigung aller Lärmquellen in der Nacht aus. Durch die höhere Fluglärmbelästigungsreaktion in Hötting auch in der Nacht, tauschen Hötting und Pradl die Plätze.

### 1.3.3. Nicht verkehrsverursachte Lärmbelästigung im Schlaf und Katastralgemeinden

Baustellenlärm, Erschütterungen, aber auch der Lärm aus Gewerbe und Industrie sind zum Teil ebenfalls verkehrsbedingt. Werden dennoch die Mittelwerte der nicht direkt verkehrsverursachten Lärmbelästigungsausmaße summiert dargestellt, ändert sich die Verteilung der Katastralgemeinden:

**Abbildung 185: Belästigung im Schlaf nach nicht verkehrsverursachten Lärmquellen und Katastralgemeinde im Mittelwertvergleich**

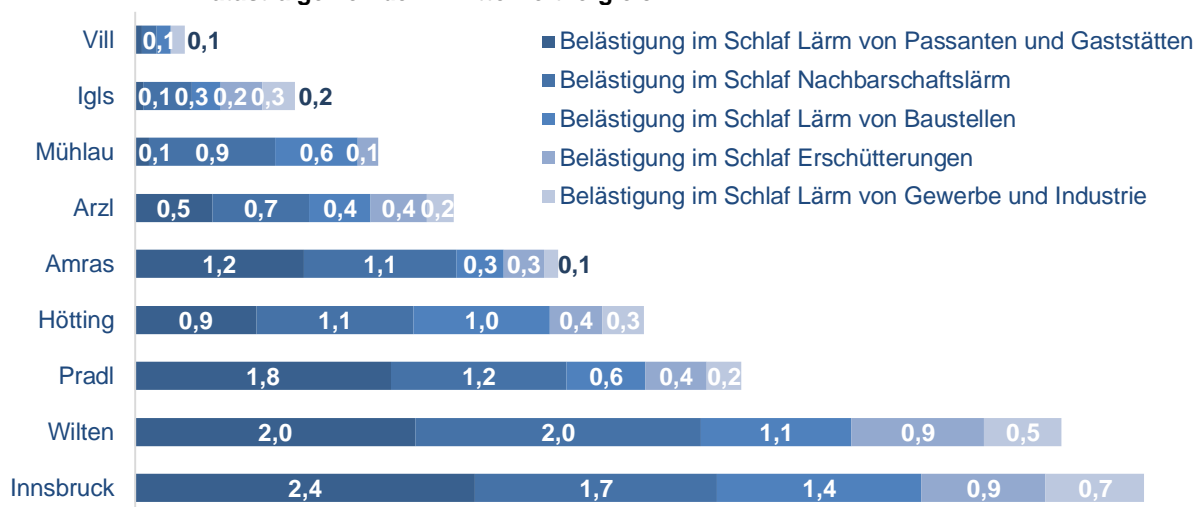

\* Nach Belästigungsausmaß (Häufigkeit) aufsteigend sortiert

## 2. Belästigung im Schlaf durch Lärm insgesamt

Die Belästigung durch Lärm im Schlaf insgesamt wurde mittels einem eigenen Item zusätzlich abgefragt.

7,8% aller befragten Innsbruckerinnen und Innsbrucker schätzen sich selbst als vom Lärm insgesamt im Schlaf stark belästigt ein (*highly annoyed sleep*: gruppierte Antwortkategorien 8, 9 und 10 [=belästigt / stört besonders stark]), knapp ein Viertel antwortet in den mittleren Kategorien und über zwei Drittel aller Probandinnen und Probanden sehen sich selbst als nur gering im Schlaf lärmbelästigt an (gruppierte Antwortkategorien 0 [=belästigt / stört überhaupt nicht], 1 und 2), davon über 45% überhaupt nicht belästigt.

**Abbildung 186: Belästigung durch Lärm im Schlaf insgesamt in Prozent**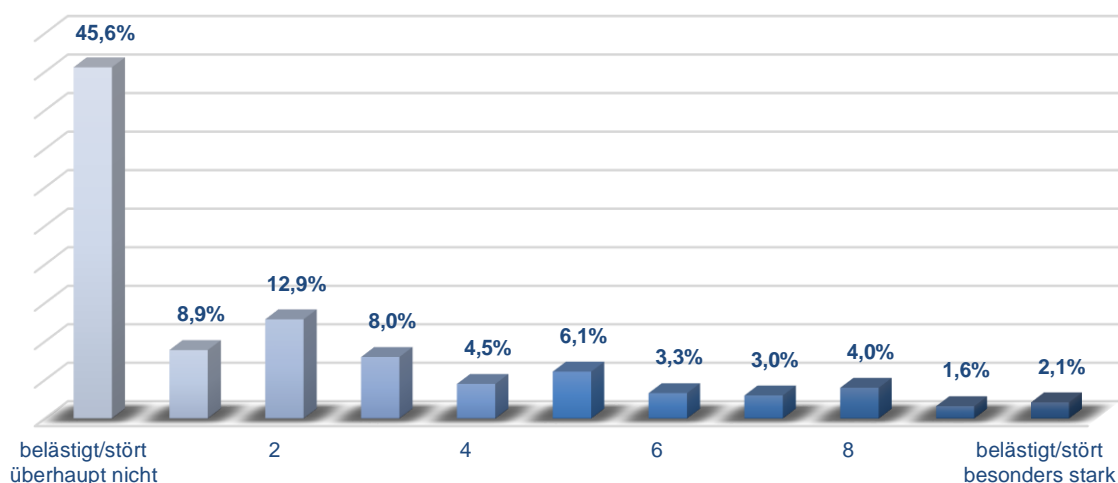

Im Mittel liegen die Antworten der befragten Probandinnen und Probanden bei 2,16 (23,8%).

**Tabelle 143: Belästigung im Schlaf durch Lärm gesamt gruppiert**

|                        | Häufigkeit | Gültige Prozente | Kumulierte Prozente |
|------------------------|------------|------------------|---------------------|
| Gering belästigt       | 695        | 67,4             | 67,4                |
| Mittelgradig belästigt | 256        | 24,8             | 92,2                |
| Stark belästigt        | 80         | 7,8              | 100,0               |
| Gesamt                 | 1031       | 100,0            |                     |

## 2.1. Belästigung im Schlaf durch Lärm insgesamt u. Katastralgemeinden

Im Mittel die größte Störung im Schlaf durch Lärm insgesamt wird in Wilten und Innsbruck empfunden, gefolgt im Abstand von einer Antwortkategorie von Pradl, Amras und Hötting:

**Abbildung 187: Belästigung im Schlaf durch Lärm insgesamt und Katastralgemeinden im Mittelwertvergleich**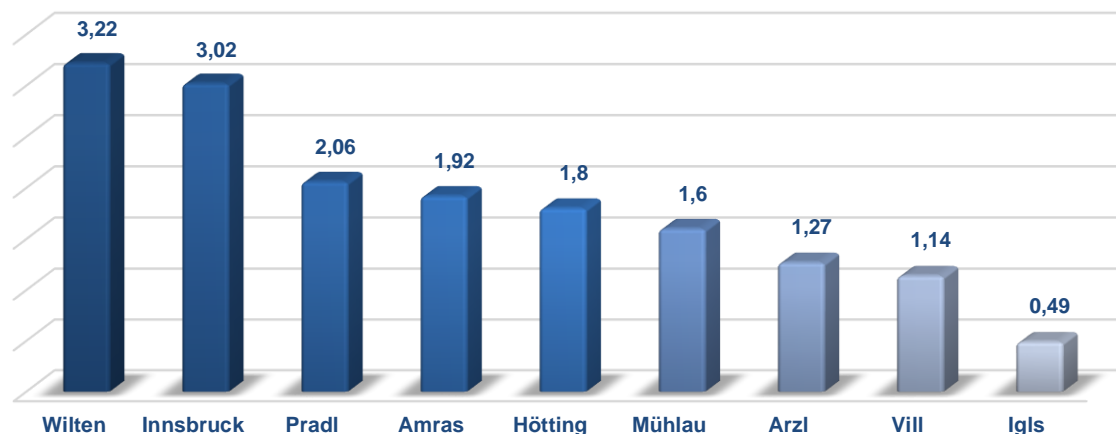

Die geringste Belästigung im Schlaf durch Lärm insgesamt im eigenen Wohnumfeld empfinden die Befragten in Igls, Vill und Arzl:

## 2.2. Belästigung im Schlaf durch Lärm insgesamt und ausgewählte Parameter

Frauen empfinden sich insgesamt deutlich stärker vom Lärm im Schlaf belästigt als Männer, insbesondere in der Extremgruppe der sich stark im Schlaf gestört Empfindenden (*highly annoyed*, Antwortkategorien 8, 9 und 10=*belästigt / stört besonders stark*):

**Abbildung 188: Belästigung im Schlaf durch Lärm insgesamt nach Geschlecht (anteilig)**

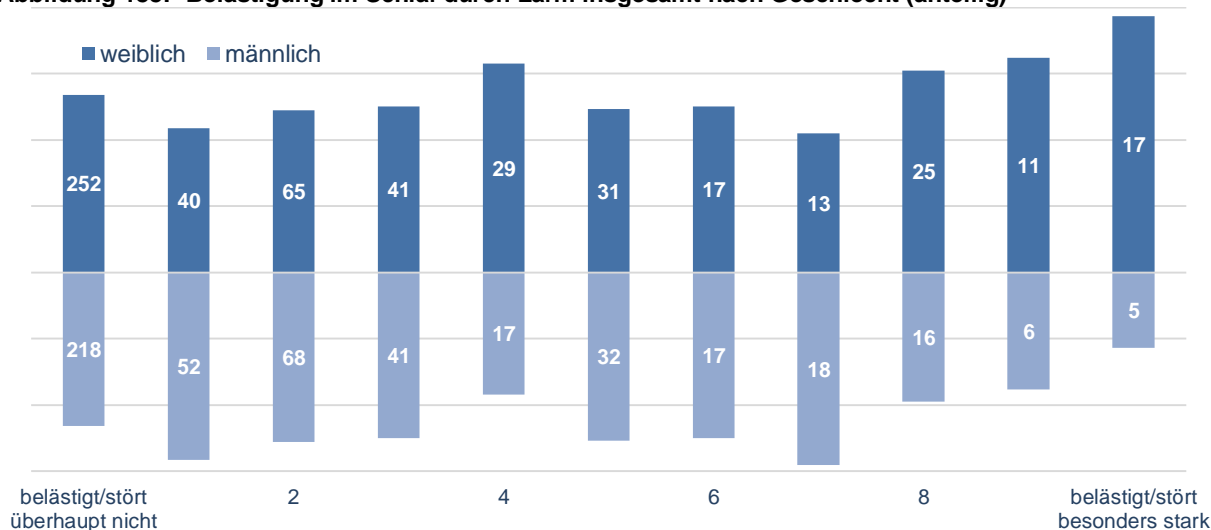

Ähnliches gilt für die mittlere Altersgruppe der 41- bis 60-Jährigen im Vergleich zu jüngeren und älteren Befragten. Der höchste erreichte Schulabschluss korrespondiert ebenfalls mit dem Belästigungsausmaß durch Lärm insgesamt im Schlaf: Akademikerinnen und Akademiker empfinden sich überdurchschnittlich, Pflichtschulabgängerinnen und –Abgänger hingegen unterdurchschnittlich stark belästigt.

Befragte, in deren Haushalt minderjährige Kinder leben, die zumeist bei geöffnetem oder gekippten Fenster schlafen, die in ihrem Wohnumfeld über eine lärmabgewandte Seite oder einen Innenhof verfügen, empfinden sich auch im Schlaf weniger vom Lärm gestört:

**Tabelle 144: Belästigung im Schlaf durch Lärm insgesamt und Nachtschlaf im Mittelwertvergleich**

| Nachtschlaf gruppiert           | Mittelwert | N    | Standardabweichung | Standardfehler MW |
|---------------------------------|------------|------|--------------------|-------------------|
| Fenster nachts geöffnet/gekippt | 1,34       | 821  | ,582               | ,020              |
| Fenster nachts geschlossen      | 1,67       | 202  | ,741               | ,052              |
| Insgesamt                       | 1,40       | 1023 | ,630               | ,020              |

Der starke Bezug zum Verkehrslärm zeigt sich, wie schon für den 24h-Zeitraum, auch in der Nacht unter anderem in Zusammenschau mit der Frage nach baulichem Schutz vor demselben:

**Abbildung 189: Belästigung im Schlaf durch Lärm insgesamt und baulicher Schutz vor Verkehrslärm im Extremgruppenvergleich in Prozent**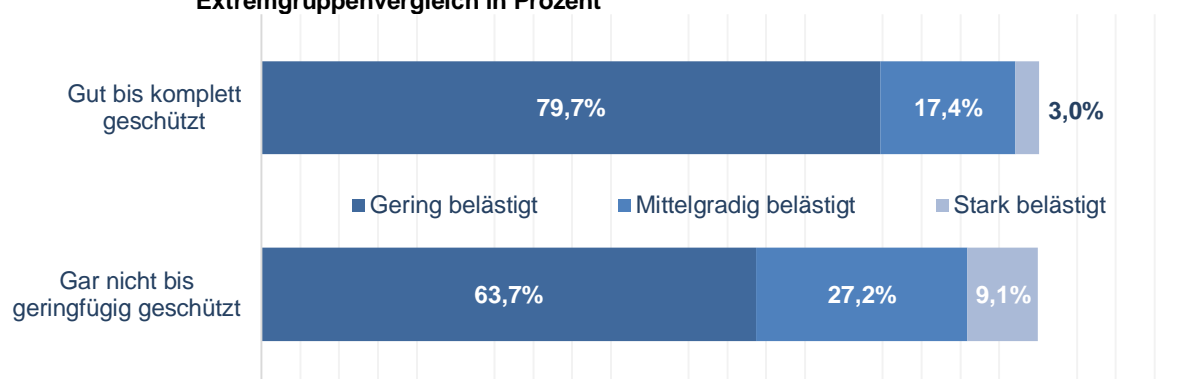

Erkennbar sich auch Beziehungen zwischen dem Ausmaß der Belästigung im Schlaf durch Lärm insgesamt und der Einschätzung und Zufriedenheit mit den eigenen Lebens- und Wohnbedingungen, den Bedingungen für das Aufwachsen von Kindern etc. Die Bezüge sind allerdings geringer ausgeprägt als für die Belästigung durch Lärm insgesamt im 24h-Zeitraum:

**Abbildung 190: Güte der eigenen Wohnbedingungen und Belästigung im Schlaf durch Lärm insgesamt im Mittelwertvergleich**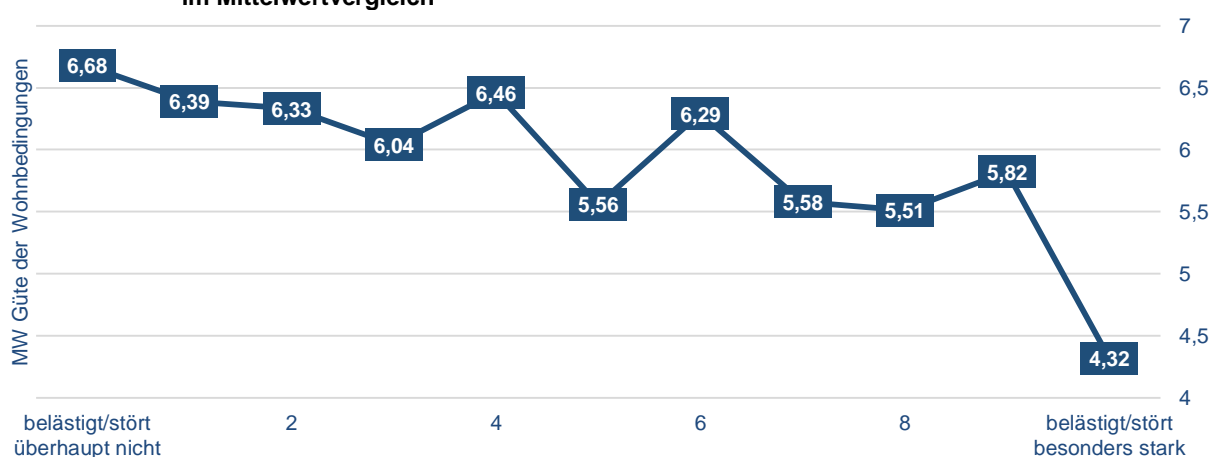

Dasselbe gilt auch für die Beziehungen zur Einschätzung der eigenen Lebensqualität und Lärmempfindlichkeit und einer ganzen Reihe anderer Parameter: Befragte Innsbruckerinnen und Innsbrucker, die sich im Schlaf lärmbelästigt fühlen,

- beurteilen das Lärmniveau in Innsbruck im Vergleich zu anderen österreichischen Städten schlechter,
- gehen häufiger davon aus, dass der Lärm insgesamt in den letzten Jahren zugenommen hat,
- schätzen die negativen Wirkungen von Lärm auf die Gesundheit stärker ein
- wenden häufiger Lärmadaptationsmechanismen an,
- sind wesentlich häufiger für (weitere) Maßnahmen zur Lärmreduktion,
- zeigen insgesamt in Bezug zu Beurteilungen der eigenen Wohn- und Lebensbedingungen eine deutlich negativere Grundhaltung.

**Abbildung 191: Lebensqualität und Belästigung im Schlaf durch Lärm insgesamt im Mittelwertvergleich**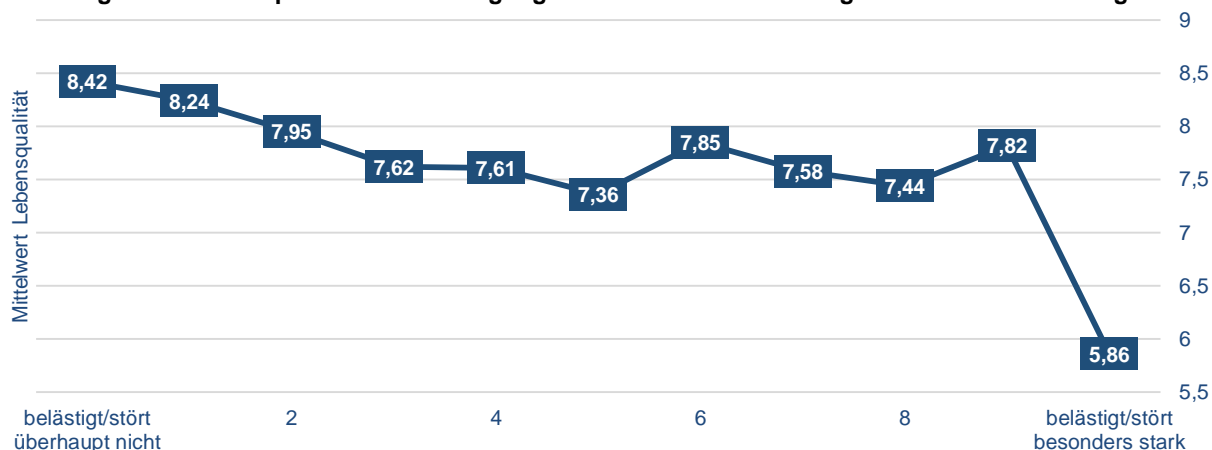

Auffällig zeigen sich, wie schon bei den anderen Fragen zur Lärmbelästigung nach Quelle, erneut diejenigen Befragten, die in der höchsten Antwortkategorie 10 (= *belästigt / stört besonders stark*) antworten.<sup>14</sup> Diese Personen zeigen – auch in den anderen Belästigungsauswertungen für den Nachtzeitraum unabhängig von der Lärmquelle und in Zusammenschau mit anderen Items – eine starke Tendenz zu negativeren Beurteilungen als die restlichen Befragten (vergleiche u.a. die oben dargestellten Abbildung zur Beurteilung der persönlichen Lebensqualität in Zusammenschau mit der Belästigung im Schlaf durch Lärm insgesamt).

**Tabelle 145: Belästigung im Schlaf durch Lärm insgesamt und ausgewählte Parameter**

|                                               |                           | Belästigung im Schlaf Lärm gesamt gruppiert |            |                        |            |                 |            |
|-----------------------------------------------|---------------------------|---------------------------------------------|------------|------------------------|------------|-----------------|------------|
|                                               |                           | Gering belästigt                            |            | Mittelgradig belästigt |            | Stark belästigt |            |
|                                               |                           | Anzahl                                      | Zeilen (%) | Anzahl                 | Zeilen (%) | Anzahl          | Zeilen (%) |
| <b>Geschlecht</b>                             | weiblich                  | 357                                         | 66,0%      | 131                    | 24,2%      | 53              | 9,8%       |
|                                               | männlich                  | 338                                         | 69,0%      | 125                    | 25,5%      | 27              | 5,5%       |
| <b>Altersgruppen</b>                          | 18 bis 40 Jahre           | 294                                         | 66,8%      | 113                    | 25,7%      | 33              | 7,5%       |
|                                               | 41 bis 60 Jahre           | 195                                         | 61,7%      | 86                     | 27,2%      | 35              | 11,1%      |
|                                               | über 60 Jahre             | 206                                         | 74,9%      | 57                     | 20,7%      | 12              | 4,4%       |
| <b>Bildungsschicht</b>                        | Primärer Schulabschluss   | 75                                          | 76,5%      | 17                     | 17,3%      | 6               | 6,1%       |
|                                               | Sekundärer Schulabschluss | 362                                         | 66,8%      | 144                    | 26,6%      | 36              | 6,6%       |
|                                               | Tertiärer Schulabschluss  | 255                                         | 65,7%      | 95                     | 24,5%      | 38              | 9,8%       |
| <b>Haushalt mit/ohne minderjährige Kinder</b> | Haushalt ohne Kinder      | 504                                         | 66,1%      | 203                    | 26,6%      | 55              | 7,2%       |
|                                               | Haushalt mit Kindern      | 191                                         | 71,0%      | 53                     | 19,7%      | 25              | 9,3%       |
| <b>Baulicher Schutz vor Verkehrslärm</b>      | Keiner bis geringfügig    | 488                                         | 63,7%      | 208                    | 27,2%      | 70              | 9,1%       |
|                                               | Gut bis komplett          | 188                                         | 79,7%      | 41                     | 17,4%      | 7               | 3,0%       |
| <b>Innenhof bzw. lärm-abgewandte Seite</b>    | Ja                        | 483                                         | 68,9%      | 170                    | 24,3%      | 48              | 6,8%       |
|                                               | Nein                      | 196                                         | 63,6%      | 81                     | 26,3%      | 31              | 10,1%      |
| <b>Nachtschlaf</b>                            | Fenster geöffnet/gekippt  | 591                                         | 72,0%      | 183                    | 22,3%      | 47              | 5,7%       |

<sup>14</sup> Für das Item *Belästigung im Schlaf durch Lärm insgesamt* handelt es sich dabei um 22 befragte Personen.



|                                                                       |                         |     |       |     |       |       |       |
|-----------------------------------------------------------------------|-------------------------|-----|-------|-----|-------|-------|-------|
|                                                                       | Fenster geschlossen     | 99  | 49,0% | 70  | 34,7% | 33    | 16,3% |
| <b>Wohnbedingungen</b>                                                | Nicht gut               | 53  | 63,1% | 19  | 22,6% | 12    | 14,3% |
|                                                                       | Durchschnittlich        | 344 | 62,0% | 163 | 29,4% | 48    | 8,6%  |
|                                                                       | Sehr gut                | 296 | 75,9% | 74  | 19,0% | 20    | 5,1%  |
| <b>Bedingungen für Kinder</b>                                         | Nicht gut               | 20  | 42,6% | 13  | 27,7% | 14    | 29,8% |
|                                                                       | Durchschnittlich        | 321 | 62,3% | 152 | 29,5% | 42    | 8,2%  |
|                                                                       | Sehr gut                | 338 | 75,6% | 86  | 19,2% | 23    | 5,1%  |
| <b>Verbundenheit zu Innsbruck</b>                                     | Nicht verbunden         | 28  | 50,9% | 17  | 30,9% | 10    | 18,2% |
|                                                                       | Durchschnittlich        | 249 | 65,7% | 98  | 25,9% | 32    | 8,4%  |
|                                                                       | Sehr verbunden          | 416 | 69,9% | 141 | 23,7% | 38    | 6,4%  |
| <b>Zufriedenheit eigene Wohnsituation</b>                             | Nicht zufrieden         | 12  | 42,9% | 7   | 25,0% | 9     | 32,1% |
|                                                                       | Durchschnittlich        | 124 | 48,1% | 98  | 38,0% | 36    | 14,0% |
|                                                                       | Sehr zufrieden          | 558 | 75,0% | 151 | 20,3% | 35    | 4,7%  |
| <b>Lebensbedingungen (Summenscore)</b>                                | Nicht gut (*)           | 1   | 20,0% | 2   | 40,0% | 2     | 40,0% |
|                                                                       | Durchschnittlich        | 414 | 61,8% | 194 | 29,0% | 62    | 9,3%  |
|                                                                       | Sehr gut                | 280 | 78,7% | 60  | 16,9% | 16    | 4,5%  |
| <b>Lebensqualität</b>                                                 | Nicht gut (*)           | 5   | 50,0% | 2   | 20,0% | 3     | 30,0% |
|                                                                       | Durchschnittlich        | 159 | 54,8% | 98  | 33,8% | 33    | 11,4% |
|                                                                       | Sehr gut                | 527 | 72,7% | 154 | 21,2% | 44    | 6,1%  |
| <b>Lärmempfindlichkeit</b>                                            | Nicht lärmempfindlich   | 231 | 84,0% | 35  | 12,7% | 9     | 3,3%  |
|                                                                       | Durchschnittlich        | 357 | 61,1% | 182 | 31,2% | 45    | 7,7%  |
|                                                                       | Sehr lärmempfindlich    | 107 | 62,2% | 39  | 22,7% | 26    | 15,1% |
| <b>Summenscore Lärmcoping</b>                                         | Coping ausgeprägt       | 75  | 31,0% | 112 | 46,3% | 55    | 22,7% |
|                                                                       | Coping nicht ausgeprägt | 620 | 78,7% | 144 | 18,3% | 24    | 3,0%  |
| <b>Gefühlte Zunahme Lärmbelastung</b>                                 | Ja                      | 220 | 50,5% | 160 | 36,7% | 56    | 12,8% |
|                                                                       | Nein                    | 475 | 79,8% | 96  | 16,1% | 24    | 4,0%  |
| <b>Gefühlte Abnahme Lärmbelastung</b>                                 | Ja                      | 44  | 75,9% | 13  | 22,4% | 1 (*) | 1,7%  |
|                                                                       | Nein                    | 651 | 66,9% | 243 | 25,0% | 79    | 8,1%  |
| <b>Notwendigkeit (weiterer) Maßnahmen Lärm</b>                        | Maßnahmen notwendig     | 423 | 61,2% | 197 | 28,5% | 71    | 10,3% |
|                                                                       | Keine Maßnahmen nötig   | 159 | 82,8% | 29  | 15,1% | 4 (*) | 2,1%  |
| <b>Negative Gesundheitswirkungen Lärm</b>                             | Gering                  | 164 | 75,6% | 46  | 21,2% | 7     | 3,2%  |
|                                                                       | Stark                   | 511 | 65,4% | 197 | 25,2% | 73    | 9,3%  |
| <b>Lautheit Innsbruck im Vergleich zu anderen Städten Österreichs</b> | Ruhiger                 | 226 | 77,4% | 48  | 16,4% | 18    | 6,2%  |
|                                                                       | Gleich                  | 370 | 67,2% | 143 | 26,0% | 38    | 6,9%  |
|                                                                       | Lauter                  | 87  | 50,0% | 64  | 36,8% | 23    | 13,2% |
| <b>Einschätzung eigener Lärmbeitrag</b>                               | Gering                  | 529 | 68,3% | 188 | 24,3% | 58    | 7,5%  |
|                                                                       | Durchschnittlich        | 148 | 65,2% | 62  | 27,3% | 17    | 7,5%  |
|                                                                       | Groß                    | 18  | 62,1% | 6   | 20,7% | 5     | 17,2% |

(\*) zu kleine Fallzahlen für solide Auswertungen

### 3. Belästigung im Schlaf durch Straßenverkehrslärm

Durch den Straßenverkehrslärm im Schlaf stark belästigt empfinden sich 5,4% aller Befragten, mehr als die Hälfte aller Befragten nimmt keine Belästigung im Schlaf wahr und insgesamt ordnen sich über drei Viertel aller Befragten der Gruppe der gering im Schlaf Lärmbelästigten zu. Im Mittel liegen die Antworten der befragten Probandinnen und Probanden bei 1,58 (17,4%) auf der 11-teiligen Antwortskala:

**Abbildung 192: Belästigung durch Straßenverkehrslärm im Schlaf in Prozent**

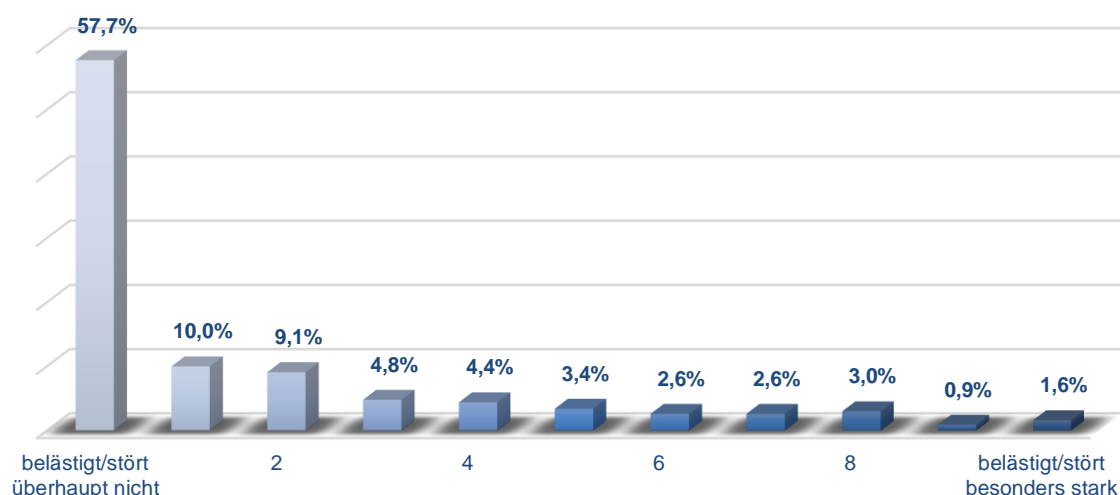

**Tabelle 146: Belästigung im Schlaf durch Straßenverkehrslärm gruppiert**

|                        | Häufigkeit | Gültige Prozente | Kumulierte Prozente |
|------------------------|------------|------------------|---------------------|
| Gering belästigt       | 792        | 76,8             | 76,8                |
| Mittelgradig belästigt | 183        | 17,7             | 94,6                |
| Stark belästigt        | 56         | 5,4              | 100,0               |
| Gesamt                 | 1031       | 100,0            |                     |

#### 3.1. Straßenlärmbelästigung im Schlaf und Straßenlärmbelastung

In der Zusammenschau der Belästigung durch Straßenverkehrslärm im Schlaf mit der gegebenen nächtlichen Straßenverkehrslärmbelastung zeigt sich ein dem 24h-Zeitraum sehr vergleichbares, etwas kontinuierlicheres Ansteigen des Belästigungsausmaßes als. Ein „Schwellenwert“ ab welchem ein stärkeres Ansteigen der Belästigungsreaktion auftritt, ist im Gegensatz zum 24h-Zeitraum nicht eindeutig festzumachen:

**Abbildung 193: Straßenlärmelastung im Schlaf und nächtliche Straßenlärmelastung  $L_n$  in 10dB-Schritten im Mittelwertvergleich**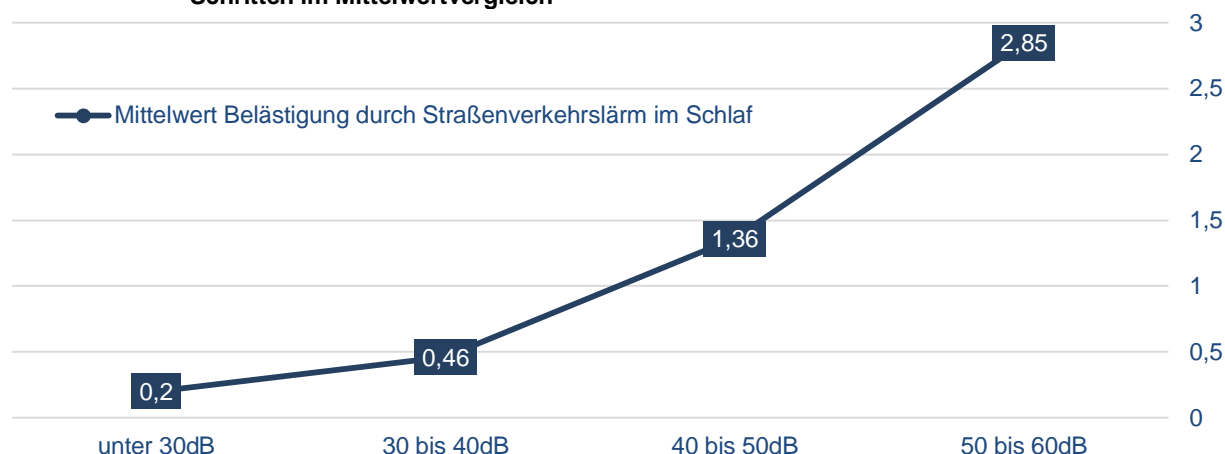

Anm.: Die Darstellung zeigt nachvollziehbare Zusammenhänge auf, enthält jedoch keine Prüfungen auf Kovariablen und andere Prädiktoren und ist somit nicht den Dosis-Wirkungskurven aus der gängigen Fachliteratur gleichzusetzen.

### 3.2. Straßenlärmelastung im Schlaf und Katastralgemeinden

Das größte Ausmaß an Belästigung durch Straßenverkehrslärm im Schlaf wird mit einem Abstand in Wilten empfunden, gefolgt von Innsbruck, Pradl und wiederum mit einem Abstand Hötting. Die geringste Störung durch Straßenverkehrslärm im Schlaf im eigenen Wohnumfeld empfinden die Befragten in Vill und Igls:

**Abbildung 194: Straßenlärmelastung im Schlaf und Katastralgemeinden im Mittelwertvergleich**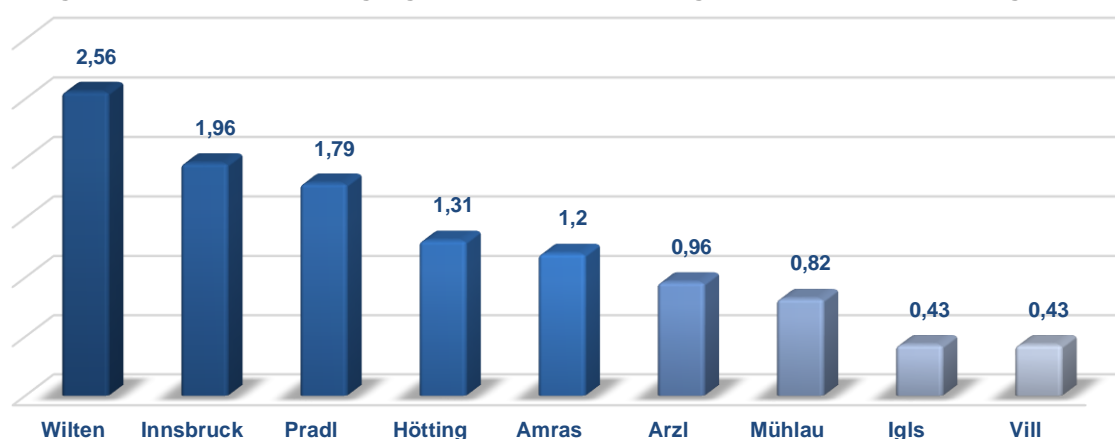

### 3.3. Straßenverkehrslärmelastung im Schlaf und andere Parameter

Die Trends, welche sich aus der Kombination der Belästigung im Schlaf durch Lärm insgesamt mit anderen Items ergeben (siehe das vorhergehende Kapitel), lassen sich auf die Belästigung im Schlaf durch Straßenverkehrslärm weitestgehend umlegen. Das gilt für die demographischen Parameter ebenso wie für die Einschätzung der Wohn- und Lebensbedingungen, das Ausmaß der Lärmempfind-

lichkeit, Nachtschlaf bei geöffnetem oder geschlossenen Fenstern, oder die vorhandene Abschirmung gegenüber Verkehrslärm usw.:

**Abbildung 195: Belästigung im Schlaf durch Straßenverkehrslärm und baulicher Schutz vor Verkehrslärm im Extremgruppenvergleich in Prozent**

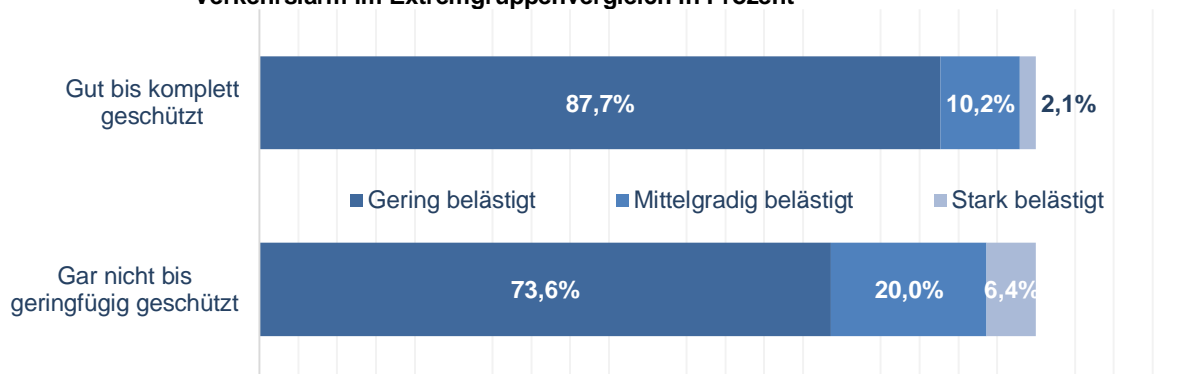

Auch das Antwortverhalten zur Einschätzung des Lärmniveaus in Innsbruck im Vergleich zu anderen Städten Österreichs verändert sich bei zunehmender Belästigung durch Straßenverkehrslärm in der Nacht (gilt ebenso für andere Verkehrslärmquellen und auch für den 24h-Zeitraum):

**Abbildung 196: Einschätzung des Lärmniveaus in Innsbruck im Vergleich zu anderen Städten Österreichs und Belästigung im Schlaf durch Straßenverkehrslärm im Mittelwertvergleich**

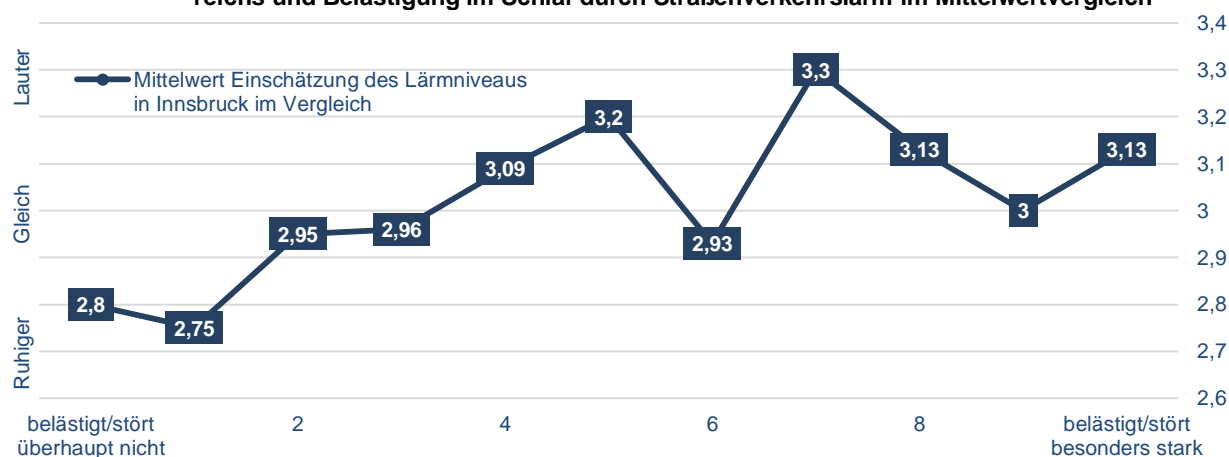

Spannend sind Zusammenhänge einzelner Fragestellung mit der Belästigung im Schlaf durch Straßenverkehrslärm (wie auch für andere Lärmquellen) in Abhängigkeit von der vorhandenen nächtlichen Straßenverkehrslärmbelastung.

So wird etwa die (beabsichtigt) diffus gestellte Frage nach der Einschätzung der Güte der Sicherheit in Innsbruck von stärker belasteten und belästigten Befragten deutlich schlechter eingestuft, als von weniger Lärmbelasteten und –Belästigten.<sup>15</sup>

<sup>15</sup> Anm.: Diese Beziehungen zeigen sich auch bei anderen Lärmbelastungsquellen.

**Abbildung 197: Einschätzung der Sicherheit und Belästigung im Schlaf durch Straßenverkehrslärm nach nächtlicher Straßenverkehrslärmbelastung  $L_n$  in 10dB-Schritten im Mittelwertvergleich**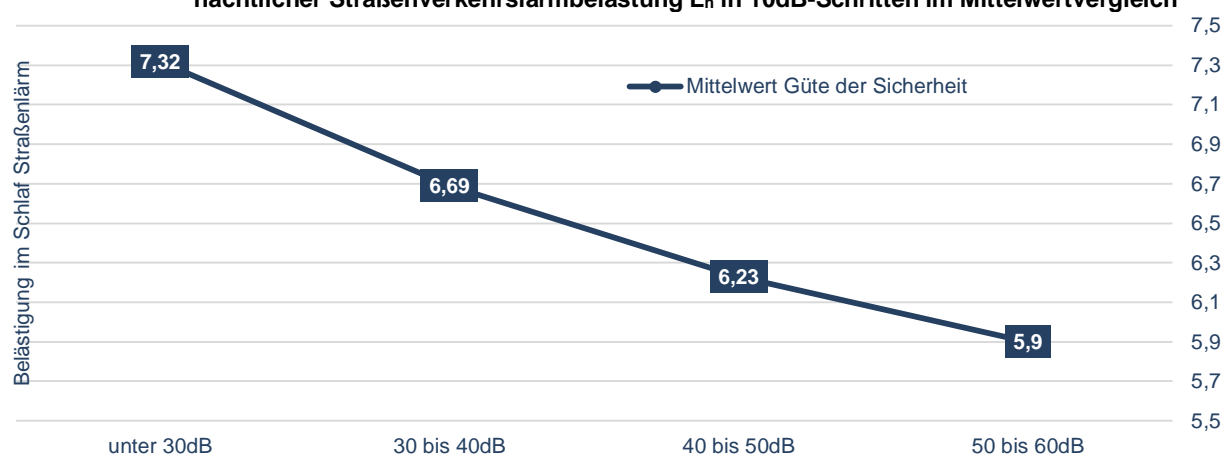**Tabelle 147: Belästigung im Schlaf durch Straßenverkehrslärm und ausgewählte Parameter**

|                                               |                           | Belästigung im Schlaf Straßenverkehrslärm gruppiert |            |                        |            |                 |            |
|-----------------------------------------------|---------------------------|-----------------------------------------------------|------------|------------------------|------------|-----------------|------------|
|                                               |                           | Gering belästigt                                    |            | Mittelgradig belästigt |            | Stark belästigt |            |
|                                               |                           | Anzahl                                              | Zeilen (%) | Anzahl                 | Zeilen (%) | Anzahl          | Zeilen (%) |
| <b>Geschlecht</b>                             | weiblich                  | 409                                                 | 75,6%      | 97                     | 17,9%      | 35              | 6,5%       |
|                                               | männlich                  | 383                                                 | 78,2%      | 86                     | 17,6%      | 21              | 4,3%       |
| <b>Altersgruppen</b>                          | 18 bis 40 Jahre           | 337                                                 | 76,6%      | 79                     | 18,0%      | 24              | 5,5%       |
|                                               | 41 bis 60 Jahre           | 236                                                 | 74,7%      | 58                     | 18,4%      | 22              | 7,0%       |
|                                               | über 60 Jahre             | 219                                                 | 79,6%      | 46                     | 16,7%      | 10              | 3,6%       |
| <b>Bildungsschicht</b>                        | Primärer Schulabschluss   | 81                                                  | 82,7%      | 13                     | 13,3%      | 4 (*)           | 4,1%       |
|                                               | Sekundärer Schulabschluss | 413                                                 | 76,2%      | 101                    | 18,6%      | 28              | 5,2%       |
|                                               | Tertiärer Schulabschluss  | 295                                                 | 76,0%      | 69                     | 17,8%      | 24              | 6,2%       |
| <b>Haushalt mit/ohne minderjährige Kinder</b> | Haushalt ohne Kinder      | 587                                                 | 77,0%      | 136                    | 17,8%      | 39              | 5,1%       |
|                                               | Haushalt mit Kindern      | 205                                                 | 76,2%      | 47                     | 17,5%      | 17              | 6,3%       |
| <b>Baulicher Schutz vor Verkehrslärm</b>      | Keiner bis geringfügig    | 564                                                 | 73,6%      | 153                    | 20,0%      | 49              | 6,4%       |
|                                               | Gut bis komplett          | 207                                                 | 87,7%      | 24                     | 10,2%      | 5               | 2,1%       |
| <b>Innenhof bzw. lärm-abgewandte Seite</b>    | Ja                        | 546                                                 | 77,9%      | 123                    | 17,5%      | 32              | 4,6%       |
|                                               | Nein                      | 229                                                 | 74,4%      | 55                     | 17,9%      | 24              | 7,8%       |
| <b>Nachtschlaf</b>                            | Fenster geöffnet/gekippt  | 658                                                 | 80,1%      | 132                    | 16,1%      | 31              | 3,8%       |
|                                               | Fenster geschlossen       | 128                                                 | 63,4%      | 49                     | 24,3%      | 25              | 12,4%      |
| <b>Wohnbedingungen</b>                        | Nicht gut                 | 67                                                  | 79,8%      | 9                      | 10,7%      | 8               | 9,5%       |
|                                               | Durchschnittlich          | 396                                                 | 71,4%      | 123                    | 22,2%      | 36              | 6,5%       |
|                                               | Sehr gut                  | 327                                                 | 83,8%      | 51                     | 13,1%      | 12              | 3,1%       |
| <b>Bedingungen für Kinder</b>                 | Nicht gut                 | 30                                                  | 63,8%      | 9                      | 19,1%      | 8               | 17,0%      |
|                                               | Durchschnittlich          | 367                                                 | 71,3%      | 112                    | 21,7%      | 36              | 7,0%       |
|                                               | Sehr gut                  | 376                                                 | 84,1%      | 59                     | 13,2%      | 12              | 2,7%       |
| <b>Verbundenheit zu Innsbruck</b>             | Nicht verbunden           | 37                                                  | 67,3%      | 13                     | 23,6%      | 5               | 9,1%       |
|                                               | Durchschnittlich          | 297                                                 | 78,4%      | 67                     | 17,7%      | 15              | 4,0%       |
|                                               | Sehr verbunden            | 456                                                 | 76,6%      | 103                    | 17,3%      | 36              | 6,1%       |

|                                                                       |                         |     |       |       |       |       |       |
|-----------------------------------------------------------------------|-------------------------|-----|-------|-------|-------|-------|-------|
| <b>Zufriedenheit eigene Wohnsituation</b>                             | Nicht zufrieden         | 19  | 67,9% | 5     | 17,9% | 4 (*) | 14,3% |
|                                                                       | Durchschnittlich        | 163 | 63,2% | 69    | 26,7% | 26    | 10,1% |
|                                                                       | Sehr zufrieden          | 610 | 82,0% | 108   | 14,5% | 26    | 3,5%  |
| <b>Lebensbedingungen (Summenscore)</b>                                | Nicht gut (*)           | 2   | 40,0% | 2     | 40,0% | 1     | 20,0% |
|                                                                       | Durchschnittlich        | 481 | 71,8% | 144   | 21,5% | 45    | 6,7%  |
|                                                                       | Sehr gut                | 309 | 86,8% | 37    | 10,4% | 10    | 2,8%  |
| <b>Lebensqualität</b>                                                 | Nicht gut (*)           | 7   | 70,0% | 2     | 20,0% | 1     | 10,0% |
|                                                                       | Durchschnittlich        | 199 | 68,6% | 68    | 23,4% | 23    | 7,9%  |
|                                                                       | Sehr gut                | 582 | 80,3% | 112   | 15,4% | 31    | 4,3%  |
| <b>Lärmempfindlichkeit</b>                                            | Nicht lärmempfindlich   | 237 | 86,2% | 33    | 12,0% | 5     | 1,8%  |
|                                                                       | Durchschnittlich        | 425 | 72,8% | 124   | 21,2% | 35    | 6,0%  |
|                                                                       | Sehr lärmempfindlich    | 130 | 75,6% | 26    | 15,1% | 16    | 9,3%  |
| <b>Summenscore</b>                                                    | Coping ausgeprägt       | 130 | 53,7% | 76    | 31,4% | 36    | 14,9% |
| <b>Lärmcoping</b>                                                     | Coping nicht ausgeprägt | 662 | 84,0% | 107   | 13,6% | 19    | 2,4%  |
| <b>Gefühlte Zunahme Lärmbelastung</b>                                 | Ja                      | 284 | 65,1% | 114   | 26,1% | 38    | 8,7%  |
|                                                                       | Nein                    | 508 | 85,4% | 69    | 11,6% | 18    | 3,0%  |
| <b>Gefühlte Abnahme Lärmbelastung</b>                                 | Ja                      | 45  | 77,6% | 11    | 19,0% | 2 (*) | 3,4%  |
|                                                                       | Nein                    | 747 | 76,8% | 172   | 17,7% | 54    | 5,5%  |
| <b>Notwendigkeit (weiterer) Maßnahmen Lärm</b>                        | Maßnahmen notwendig     | 495 | 71,6% | 143   | 20,7% | 53    | 7,7%  |
|                                                                       | Keine Maßnahmen nötig   | 174 | 90,6% | 18    | 9,4%  | 0 (*) | 0,0%  |
| <b>Negative Gesundheitswirkungen Lärm</b>                             | Gering                  | 185 | 85,3% | 26    | 12,0% | 6     | 2,8%  |
|                                                                       | Stark                   | 584 | 74,8% | 149   | 19,1% | 48    | 6,1%  |
| <b>Lautheit Innsbruck im Vergleich zu anderen Städten Österreichs</b> | Ruhiger                 | 243 | 83,2% | 40    | 13,7% | 9     | 3,1%  |
|                                                                       | Gleich                  | 424 | 77,0% | 92    | 16,7% | 35    | 6,4%  |
|                                                                       | Lauter                  | 112 | 64,4% | 50    | 28,7% | 12    | 6,9%  |
| <b>Einschätzung eigener Lärmbeitrag</b>                               | Gering                  | 605 | 78,1% | 128   | 16,5% | 42    | 5,4%  |
|                                                                       | Durchschnittlich        | 166 | 73,1% | 51    | 22,5% | 10    | 4,4%  |
|                                                                       | Groß                    | 21  | 72,4% | 4 (*) | 13,8% | 4 (*) | 13,8% |

(\*) zu kleine Fallzahlen für solide Auswertungen

#### 4. Belästigung im Schlaf durch Lärm von Passanten und Gaststätten

Die wahrgenommene Belästigung im Schlaf durch den Lärm verursacht von Passanten und Gaststätten ist in ihren Ausprägungen nahezu deckungsgleich mit jener durch den Straßenverkehrslärm.

Im Mittel liegen die Antworten der befragten Innsbruckerinnen und Innsbrucker jedoch unterhalb der Werte vom Straßenverkehrslärm bei 1,36 (15,0%):

**Abbildung 198: Belästigung durch Lärm von Passanten und Gaststätten im Schlaf in Prozent**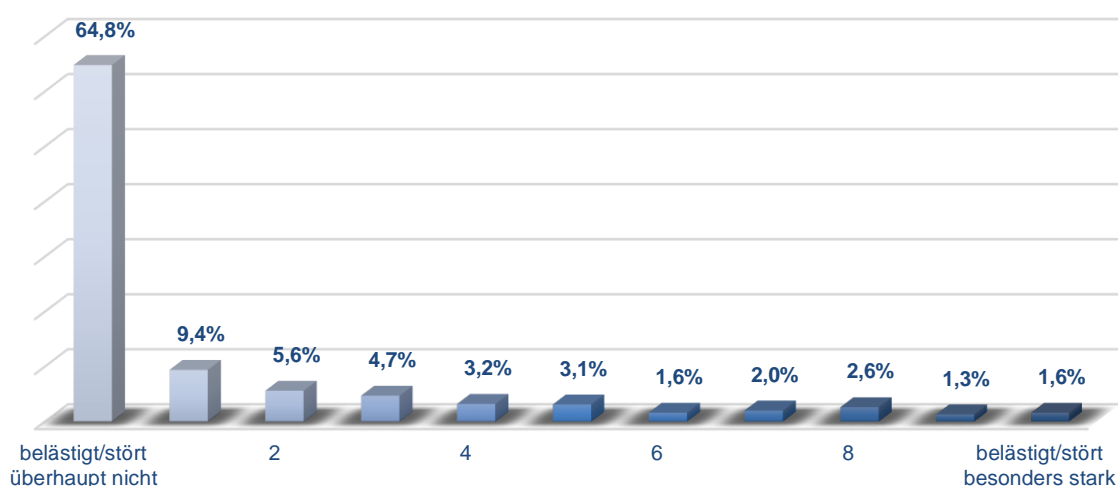**Tabelle 148: Belästigung im Schlaf durch Lärm von Passanten und Gaststätten gruppiert**

|                        | Häufigkeit | Gültige Prozente | Kumulierte Prozente |
|------------------------|------------|------------------|---------------------|
| Gering belästigt       | 823        | 79,8             | 79,8                |
| Mittelgradig belästigt | 151        | 14,6             | 94,5                |
| Stark belästigt        | 57         | 5,5              | 100,0               |
| Gesamt                 | 1031       | 100,0            |                     |

#### 4.1. Lärmbelästigung im Schlaf durch Passanten und Gaststätten und Katastralgemeinden

Die Belästigung im Schlaf durch den Lärm von Passanten und Gaststätten ist in den inneren Stadtbezirken naturgemäß größer und in Vill, Igls und Mühlau de facto nicht existent:

**Abbildung 199: Lärmbelästigung im Schlaf durch Passanten und Gaststätten und Katastralgemeinden im Mittelwertvergleich**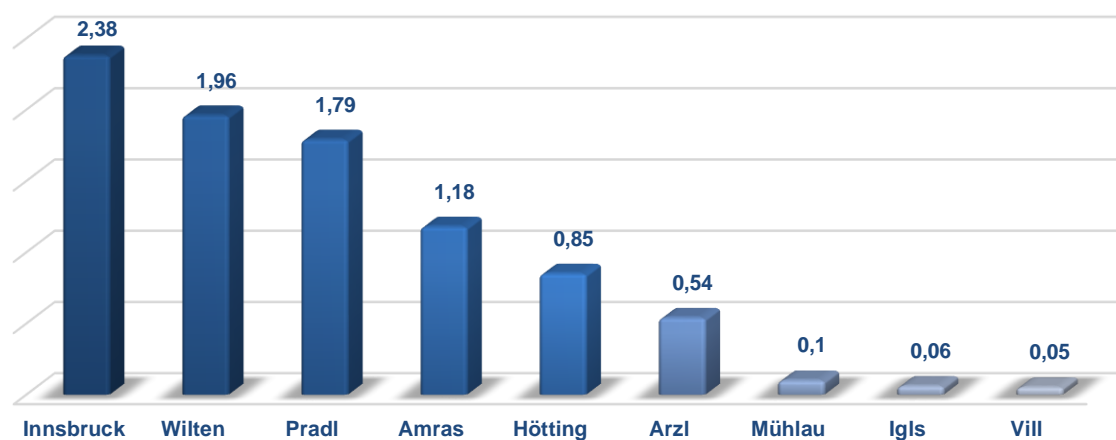

#### 4.2. Lärmbelästigung im Schlaf durch Passanten und Gaststätten und ausgewählte Parameter

Auch für die Belästigung im Schlaf durch den Lärm von Passanten und Gaststätten zeigen sich sehr ähnliche Zusammenhänge zu anderen Items, wie schon im Falle der Auswertungen zur Belästigung im Schlaf durch Lärm insgesamt oder auch durch den nächtlichen Straßenverkehrslärm.

Die Unterschiede zwischen den Extremgruppen und den Mittelwertvergleichen entsprechen in ihren Ausmaßen ebenso den Analysen zur Belästigung im Schlaf durch Verkehrslärm oder den Lärm insgesamt.

**Abbildung 200: Belästigung im Schlaf durch Lärm von Passanten und Gaststätten und Verbundenheit zur Stadt Innsbruck im Extremgruppenvergleich in Prozent**

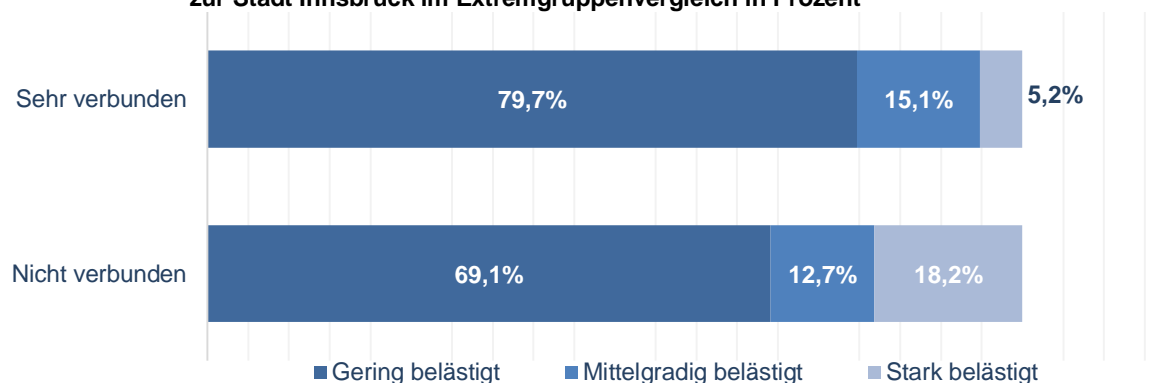

Im Folgenden einige ausgewählte Parameter, jeweils in 3 Belästigungsgruppen zusammengefasst, in Zusammenschau mit der Belästigung im Schlaf durch den Lärm von Passanten und Gaststätten:

**Tabelle 149: Belästigung im Schlaf durch Passanten und Gaststätten und ausgewählte Parameter**

|                                               |                           | Belästigung im Schlaf Lärm von Passanten und Gaststätten |            |                        |            |                 |            |
|-----------------------------------------------|---------------------------|----------------------------------------------------------|------------|------------------------|------------|-----------------|------------|
|                                               |                           | Gering belästigt                                         |            | Mittelgradig belästigt |            | Stark belästigt |            |
|                                               |                           | Anzahl                                                   | Zeilen (%) | Anzahl                 | Zeilen (%) | Anzahl          | Zeilen (%) |
| <b>Geschlecht</b>                             | weiblich                  | 422                                                      | 78,0%      | 85                     | 15,7%      | 34              | 6,3%       |
|                                               | männlich                  | 401                                                      | 81,8%      | 66                     | 13,5%      | 23              | 4,7%       |
| <b>Altersgruppen</b>                          | 18 bis 40 Jahre           | 346                                                      | 78,6%      | 65                     | 14,8%      | 29              | 6,6%       |
|                                               | 41 bis 60 Jahre           | 249                                                      | 78,8%      | 44                     | 13,9%      | 23              | 7,3%       |
|                                               | über 60 Jahre             | 228                                                      | 82,9%      | 42                     | 15,3%      | 5               | 1,8%       |
| <b>Bildungsschicht</b>                        | Primärer Schulabschluss   | 82                                                       | 83,7%      | 11                     | 11,2%      | 5               | 5,1%       |
|                                               | Sekundärer Schulabschluss | 423                                                      | 78,0%      | 91                     | 16,8%      | 28              | 5,2%       |
|                                               | Tertiärer Schulabschluss  | 315                                                      | 81,2%      | 49                     | 12,6%      | 24              | 6,2%       |
| <b>Haushalt mit/ohne minderjährige Kinder</b> | Haushalt ohne Kinder      | 600                                                      | 78,7%      | 116                    | 15,2%      | 46              | 6,0%       |
|                                               | Haushalt mit Kindern      | 223                                                      | 82,9%      | 35                     | 13,0%      | 11              | 4,1%       |
| <b>Baulicher Schutz vor Verkehrslärm</b>      | Keiner bis geringfügig    | 598                                                      | 78,1%      | 118                    | 15,4%      | 50              | 6,5%       |
|                                               | Gut bis komplett          | 202                                                      | 85,6%      | 27                     | 11,4%      | 7               | 3,0%       |
| <b>Innenhof bzw. lärm-abgewandte Seite</b>    | Ja                        | 547                                                      | 78,0%      | 116                    | 16,5%      | 38              | 5,4%       |
|                                               | Nein                      | 256                                                      | 83,1%      | 33                     | 10,7%      | 19              | 6,2%       |
| <b>Nachtschlaf</b>                            | Fenster geöffnet/gekippt  | 673                                                      | 82,0%      | 113                    | 13,8%      | 35              | 4,3%       |



|                                                                       |                         |     |       |       |       |       |       |
|-----------------------------------------------------------------------|-------------------------|-----|-------|-------|-------|-------|-------|
|                                                                       | Fenster geschlossen     | 143 | 70,8% | 37    | 18,3% | 22    | 10,9% |
| <b>Wohnbedingungen</b>                                                | Nicht gut               | 58  | 69,0% | 13    | 15,5% | 13    | 15,5% |
|                                                                       | Durchschnittlich        | 425 | 76,6% | 95    | 17,1% | 35    | 6,3%  |
|                                                                       | Sehr gut                | 338 | 86,7% | 43    | 11,0% | 9     | 2,3%  |
| <b>Bedingungen für Kinder</b>                                         | Nicht gut               | 24  | 51,1% | 15    | 31,9% | 8     | 17,0% |
|                                                                       | Durchschnittlich        | 391 | 75,9% | 89    | 17,3% | 35    | 6,8%  |
|                                                                       | Sehr gut                | 389 | 87,0% | 45    | 10,1% | 13    | 2,9%  |
| <b>Verbundenheit zu Innsbruck</b>                                     | Nicht verbunden         | 38  | 69,1% | 7     | 12,7% | 10    | 18,2% |
|                                                                       | Durchschnittlich        | 309 | 81,5% | 54    | 14,2% | 16    | 4,2%  |
|                                                                       | Sehr verbunden          | 474 | 79,7% | 90    | 15,1% | 31    | 5,2%  |
| <b>Zufriedenheit eigene Wohnsituation</b>                             | Nicht zufrieden         | 17  | 60,7% | 7     | 25,0% | 4 (*) | 14,3% |
|                                                                       | Durchschnittlich        | 170 | 65,9% | 62    | 24,0% | 26    | 10,1% |
|                                                                       | Sehr zufrieden          | 635 | 85,3% | 82    | 11,0% | 27    | 3,6%  |
| <b>Lebensbedingungen (Summenscore)</b>                                | Nicht gut (*)           | 2   | 40,0% | 1     | 20,0% | 2     | 40,0% |
|                                                                       | Durchschnittlich        | 504 | 75,2% | 118   | 17,6% | 48    | 7,2%  |
|                                                                       | Sehr gut                | 317 | 89,0% | 32    | 9,0%  | 7     | 2,0%  |
| <b>Lebensqualität</b>                                                 | Nicht gut (*)           | 6   | 60,0% | 0     | 0,0%  | 4     | 40,0% |
|                                                                       | Durchschnittlich        | 209 | 72,1% | 63    | 21,7% | 18    | 6,2%  |
|                                                                       | Sehr gut                | 604 | 83,3% | 87    | 12,0% | 34    | 4,7%  |
| <b>Lärmempfindlichkeit</b>                                            | Nicht lärmempfindlich   | 247 | 89,8% | 21    | 7,6%  | 7     | 2,5%  |
|                                                                       | Durchschnittlich        | 448 | 76,7% | 104   | 17,8% | 32    | 5,5%  |
|                                                                       | Sehr lärmempfindlich    | 128 | 74,4% | 26    | 15,1% | 18    | 10,5% |
| <b>Summenscore Lärmcoping</b>                                         | Coping ausgeprägt       | 137 | 56,6% | 70    | 28,9% | 35    | 14,5% |
|                                                                       | Coping nicht ausgeprägt | 685 | 86,9% | 81    | 10,3% | 22    | 2,8%  |
| <b>Gefühlte Zunahme Lärmbelastung</b>                                 | Ja                      | 309 | 70,9% | 92    | 21,1% | 35    | 8,0%  |
| <b>Gefühlte Abnahme Lärmbelastung</b>                                 | Nein                    | 514 | 86,4% | 59    | 9,9%  | 22    | 3,7%  |
| <b>Notwendigkeit (weiterer) Maßnahmen Lärm</b>                        | Ja                      | 47  | 81,0% | 9     | 15,5% | 2 (*) | 3,4%  |
|                                                                       | Nein                    | 776 | 79,8% | 142   | 14,6% | 55    | 5,7%  |
| <b>Negative Gesundheitswirkungen Lärm</b>                             | Maßnahmen notwendig     | 527 | 76,3% | 112   | 16,2% | 52    | 7,5%  |
|                                                                       | Keine Maßnahmen nötig   | 174 | 90,6% | 16    | 8,3%  | 2 (*) | 1,0%  |
| <b>Lautheit Innsbruck im Vergleich zu anderen Städten Österreichs</b> | Gering                  | 190 | 87,6% | 22    | 10,1% | 5     | 2,3%  |
|                                                                       | Stark                   | 606 | 77,6% | 123   | 15,7% | 52    | 6,7%  |
| <b>Einschätzung eigener Lärmbeitrag</b>                               | Ruhiger                 | 253 | 86,6% | 29    | 9,9%  | 10    | 3,4%  |
|                                                                       | Gleich                  | 440 | 79,9% | 81    | 14,7% | 30    | 5,4%  |
|                                                                       | Lauter                  | 118 | 67,8% | 40    | 23,0% | 16    | 9,2%  |
| <b>Einschätzung eigener Lärmbeitrag</b>                               | Gering                  | 626 | 80,8% | 111   | 14,3% | 38    | 4,9%  |
|                                                                       | Durchschnittlich        | 175 | 77,1% | 36    | 15,9% | 16    | 7,0%  |
|                                                                       | Groß                    | 22  | 75,9% | 4 (*) | 13,8% | 3 (*) | 10,3% |

(\*) zu kleine Fallzahlen für solide Auswertungen

## 5. Belästigung im Schlaf durch Nachbarschaftslärm

Die Belästigung im Schlaf durch Nachbarschaftslärm steht auf Platz drei der am meisten störenden Lärmquellen. 4,3% aller Probandinnen und Probanden schätzen sich als stark vom Nachbarschaftslärm im Schlaf belästigt ein, über 80% als gering belästigt, davon knapp zwei Drittel *überhaupt nicht gestört*.

**Abbildung 201: Belästigung durch Nachbarschaftslärm im Schlaf in Prozent**

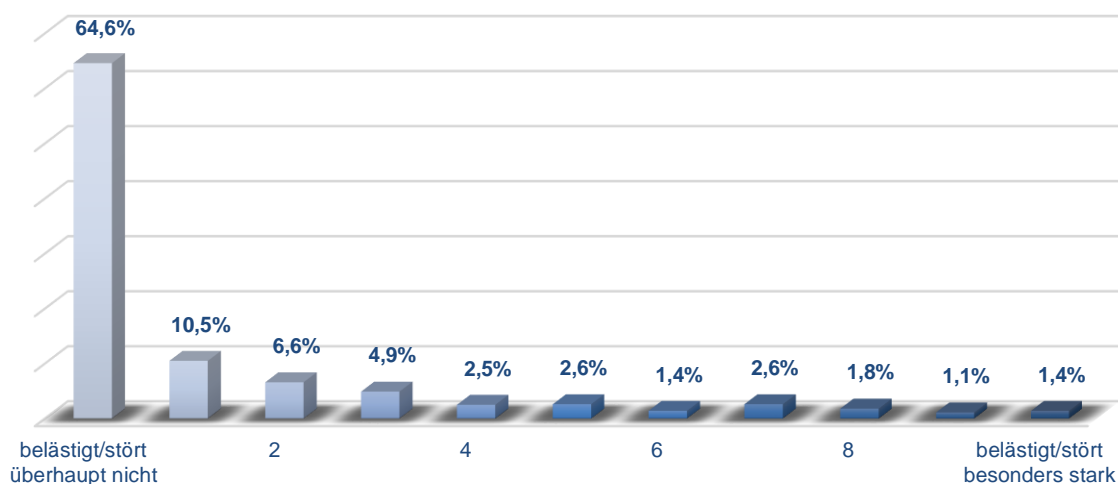

Im Mittel liegen die Antworten der Befragten bei 1,26 (13,9%).

**Tabelle 150: Belästigung im Schlaf durch Nachbarschaftslärm gruppiert**

|                        | Häufigkeit | Gültige Prozente | Kumulierte Prozente |
|------------------------|------------|------------------|---------------------|
| Gering belästigt       | 842        | 81,7             | 81,7                |
| Mittelgradig belästigt | 145        | 14,1             | 95,7                |
| Stark belästigt        | 44         | 4,3              | 100,0               |
| Gesamt                 | 1031       | 100,0            |                     |

### 5.1. Nachbarschaftslärmbelästigung im Schlaf und Katastralgemeinden

Die Belästigung durch Nachbarschaftslärm im Schlaf nach Katastralgemeinden unterscheidet sich vom 24h-Zeitraum: Liegen Innsbruck, Wilten und Pradl im Antwortverhalten der Befragten im 24h-Zeitraum nahezu gleichauf, so sehen sich die befragten Wiltenerinnen und Wiltener im Nachtzeitraum stärker vom Nachbarschaftslärm im Schlaf gestört als die Einwohnerinnen und Einwohner der Katastralgemeinde Innsbruck und diese wiederum stärker als die Pradlerinnen und Pradler. Am wenigsten vom Nachbarschaftslärm im Schlaf gestört empfinden sich die Befragten in Vill und Igls:

**Abbildung 202: Nachbarschaftslärbelästigung im Schlaf und Katastralgemeinden im Mittelwertvergleich**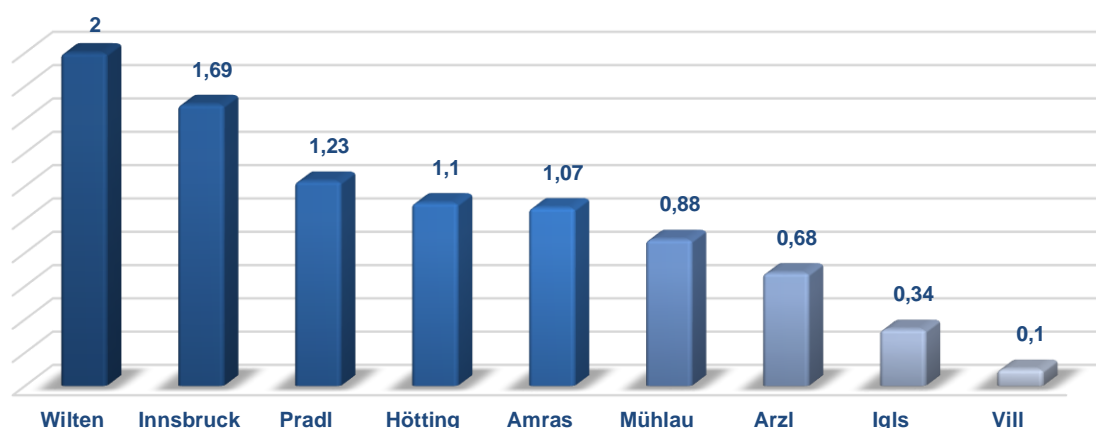

## 5.2. Nachbarschaftslärbelästigung im Schlaf und einzelne Parameter

Auch bei der Belästigung im Schlaf durch Nachbarschaftslärm werden dieselben grundsätzlichen Zusammenhänge wie schon bei den vorhergehenden Auswertungen zu anderen Lärmbelastigungsquellen sichtbar. Die Störung durch Nachbarschaftslärm in der Nacht zeigt jedoch vergleichsweise stark ausgeprägte Beziehungen zu den Fragen zu den eigenen Wohn- und Lebensbedingungen. Sich stark vom Nachbarschaftslärm im Schlaf belästigte Innsbruckerinnen und Innsbrucker beurteilen diese deutlich schlechter als gar nicht oder nur gering belästigte Befragte:

**Abbildung 203: Zufriedenheit mit der eigenen Wohnsituation insgesamt und Belästigung im Schlaf durch Nachbarschaftslärm im Mittelwertvergleich**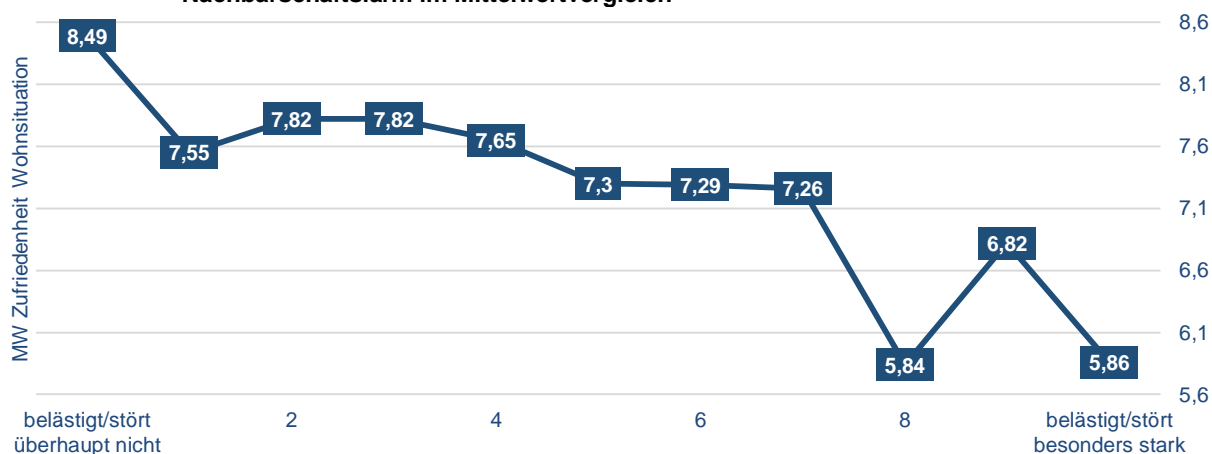

Im Folgenden einige ausgewählte Parameter, jeweils in 3 Belästigungsgruppen zusammengefasst, in Zusammenschau mit der Belästigung im Schlaf durch Nachbarschaftslärm:

**Tabelle 151: Belästigung im Schlaf durch Nachbarschaftslärm und ausgewählte Parameter**

| Belästigung im Schlaf Nachbarschaftslärm gruppiert |            |                        |            |                 |            |
|----------------------------------------------------|------------|------------------------|------------|-----------------|------------|
| Gering belästigt                                   |            | Mittelgradig belästigt |            | Stark belästigt |            |
| Anzahl                                             | Zeilen (%) | Anzahl                 | Zeilen (%) | Anzahl          | Zeilen (%) |

|                                                                       |                           |     |       |     |       |       |       |
|-----------------------------------------------------------------------|---------------------------|-----|-------|-----|-------|-------|-------|
| <b>Geschlecht</b>                                                     | weiblich                  | 435 | 80,4% | 79  | 14,6% | 27    | 5,0%  |
|                                                                       | männlich                  | 407 | 83,1% | 66  | 13,5% | 17    | 3,5%  |
| <b>Altersgruppen</b>                                                  | 18 bis 40 Jahre           | 357 | 81,1% | 64  | 14,5% | 19    | 4,3%  |
|                                                                       | 41 bis 60 Jahre           | 245 | 77,5% | 50  | 15,8% | 21    | 6,6%  |
|                                                                       | über 60 Jahre             | 240 | 87,3% | 31  | 11,3% | 4 (*) | 1,5%  |
| <b>Bildungsschicht</b>                                                | Primärer Schulabschluss   | 86  | 87,8% | 9   | 9,2%  | 3 (*) | 3,1%  |
|                                                                       | Sekundärer Schulabschluss | 443 | 81,7% | 79  | 14,6% | 20    | 3,7%  |
|                                                                       | Tertiärer Schulabschluss  | 310 | 79,9% | 57  | 14,7% | 21    | 5,4%  |
| <b>Haushalt mit/ohne minderjährige Kinder</b>                         | Haushalt ohne Kinder      | 616 | 80,8% | 114 | 15,0% | 32    | 4,2%  |
|                                                                       | Haushalt mit Kindern      | 226 | 84,0% | 31  | 11,5% | 12    | 4,5%  |
| <b>Nachtschlaf</b>                                                    | Fenster geöffnet/gekippt  | 685 | 83,4% | 114 | 13,9% | 22    | 2,7%  |
|                                                                       | Fenster geschlossen       | 151 | 74,8% | 29  | 14,4% | 22    | 10,9% |
| <b>Wohnbedingungen</b>                                                | Nicht gut                 | 58  | 69,0% | 17  | 20,2% | 9     | 10,7% |
|                                                                       | Durchschnittlich          | 440 | 79,3% | 89  | 16,0% | 26    | 4,7%  |
|                                                                       | Sehr gut                  | 342 | 87,7% | 39  | 10,0% | 9     | 2,3%  |
| <b>Verbundenheit zu Innsbruck</b>                                     | Nicht verbunden           | 36  | 65,5% | 10  | 18,2% | 9     | 16,4% |
|                                                                       | Durchschnittlich          | 300 | 79,2% | 67  | 17,7% | 12    | 3,2%  |
|                                                                       | Sehr verbunden            | 504 | 84,7% | 68  | 11,4% | 23    | 3,9%  |
| <b>Zufriedenheit eigene Wohnsituation</b>                             | Nicht zufrieden           | 17  | 60,7% | 5   | 17,9% | 6     | 21,4% |
|                                                                       | Durchschnittlich          | 188 | 72,9% | 53  | 20,5% | 17    | 6,6%  |
|                                                                       | Sehr zufrieden            | 636 | 85,5% | 87  | 11,7% | 21    | 2,8%  |
| <b>Lebensbedingungen (Summenscore)</b>                                | Nicht gut (*)             | 1   | 20,0% | 3   | 60,0% | 1     | 20,0% |
|                                                                       | Durchschnittlich          | 517 | 77,2% | 115 | 17,2% | 38    | 5,7%  |
|                                                                       | Sehr gut                  | 324 | 91,0% | 27  | 7,6%  | 5     | 1,4%  |
| <b>Lebensqualität</b>                                                 | Nicht gut (*)             | 4   | 40,0% | 3   | 30,0% | 3     | 30,0% |
|                                                                       | Durchschnittlich          | 214 | 73,8% | 55  | 19,0% | 21    | 7,2%  |
|                                                                       | Sehr gut                  | 620 | 85,5% | 85  | 11,7% | 20    | 2,8%  |
| <b>Lärmempfindlichkeit</b>                                            | Nicht lärmempfindlich     | 249 | 90,5% | 19  | 6,9%  | 7     | 2,5%  |
|                                                                       | Durchschnittlich          | 465 | 79,6% | 96  | 16,4% | 23    | 3,9%  |
|                                                                       | Sehr lärmempfindlich      | 128 | 74,4% | 30  | 17,4% | 14    | 8,1%  |
| <b>Summenscore Lärmcoping</b>                                         | Coping ausgeprägt         | 149 | 61,6% | 64  | 26,4% | 29    | 12,0% |
|                                                                       | Coping nicht ausgeprägt   | 693 | 87,9% | 81  | 10,3% | 14    | 1,8%  |
| <b>Notwendigkeit (weiterer) Maßnahmen Lärm</b>                        | Maßnahmen notwendig       | 545 | 78,9% | 111 | 16,1% | 35    | 5,1%  |
|                                                                       | Keine Maßnahmen nötig     | 169 | 88,0% | 18  | 9,4%  | 5     | 2,6%  |
| <b>Negative Gesundheitswirkungen Lärm</b>                             | Gering                    | 196 | 90,3% | 16  | 7,4%  | 5     | 2,3%  |
|                                                                       | Stark                     | 620 | 79,4% | 122 | 15,6% | 39    | 5,0%  |
| <b>Lautheit Innsbruck im Vergleich zu anderen Städten Österreichs</b> | Ruhiger                   | 247 | 84,6% | 36  | 12,3% | 9     | 3,1%  |
|                                                                       | Gleich                    | 451 | 81,9% | 80  | 14,5% | 20    | 3,6%  |
|                                                                       | Lauter                    | 132 | 75,9% | 27  | 15,5% | 15    | 8,6%  |
| <b>Einschätzung eigener Lärmbeitrag</b>                               | Gering                    | 635 | 81,9% | 110 | 14,2% | 30    | 3,9%  |
|                                                                       | Durchschnittlich          | 185 | 81,5% | 30  | 13,2% | 12    | 5,3%  |
|                                                                       | Groß                      | 22  | 75,9% | 5   | 17,2% | 2 (*) | 6,9%  |

(\*) zu kleine Fallzahlen für solide Auswertungen

## 6. Belästigung im Schlaf durch Flugverkehrslärm

Knapp 4% aller befragten Innsbruckerinnen und Innsbrucker fühlen sich im Schlaf durch Flugverkehrslärm stark gestört (*highly annoyed sleep*: gruppierte Antwortkategorien 8, 9 und 10 [=belästigt / stört besonders stark]), knapp 85% aller Probandinnen und Probanden sehen sich selbst als nur gering im Schlaf fluglärmbelästigt an (gruppierte Antwortkategorien 0 [=belästigt / stört überhaupt nicht], 1 und 2), davon über 70% überhaupt nicht belästigt.

**Abbildung 204: Belästigung im Schlaf durch Flugverkehrslärm in Prozent**

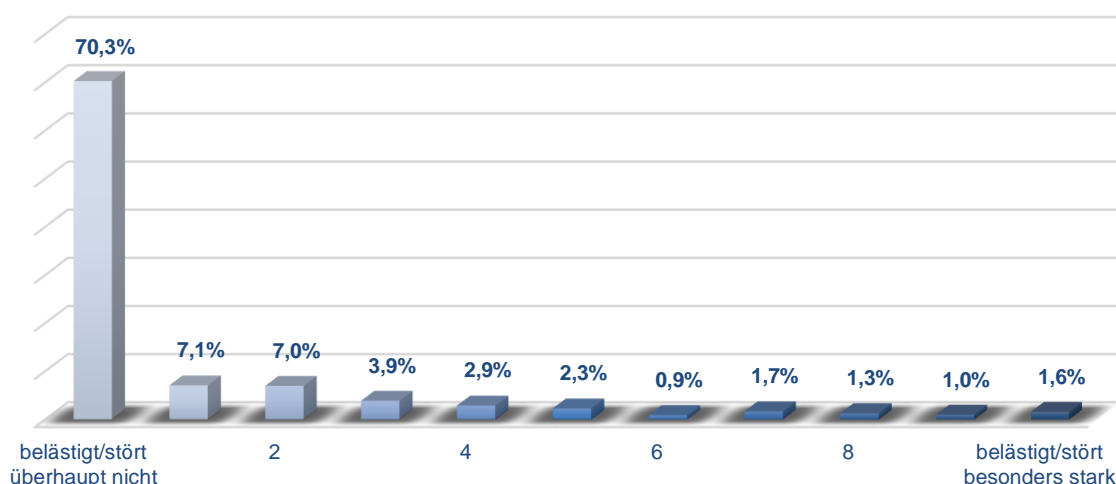

Im Mittel liegen die Antworten im befragten Kollektiv bei 1,09 (12,0%) auf der 11-teiligen Antwortskala.

**Tabelle 152: Belästigung im Schlaf durch Fluglärm gruppiert**

|                        | Häufigkeit | Gültige Prozente | Kumulierte Prozente |
|------------------------|------------|------------------|---------------------|
| Gering belästigt       | 870        | 84,4             | 84,4                |
| Mittelgradig belästigt | 121        | 11,7             | 96,1                |
| Stark belästigt        | 40         | 3,9              | 100,0               |
| Gültig                 |            |                  |                     |
| Gesamt                 | 1031       | 100,0            |                     |

### 6.1. Fluglärmbelästigung im Schlaf und Fluglärmbelastung

Die Belästigung im Schlaf durch den nächtlichen Flugverkehrslärm ist in den einzelnen – vergleichsweise niederen – Lärmbelastungsklassen im Unterschied zur empfundenen Störung im Schlaf durch den nächtlichen Straßen- und Schienenverkehrslärm in etwa gleich hoch wie im 24h-Zeitraum und steigt sehr linear mit zunehmender Belastung an. Für den Nachtzeitraum sind keine Befragten mit Dauerschallpegeln über 50dB belastet, weshalb das Belästigungsempfinden durch Flugverkehrslärm in der Nacht insgesamt vergleichsweise gering ausgeprägt ist:

**Abbildung 205: Fluglärmbelästigung im Schlaf und nächtliche Fluglärmbelastung  $L_n$  in 10dB-Schritten im Mittelwertvergleich**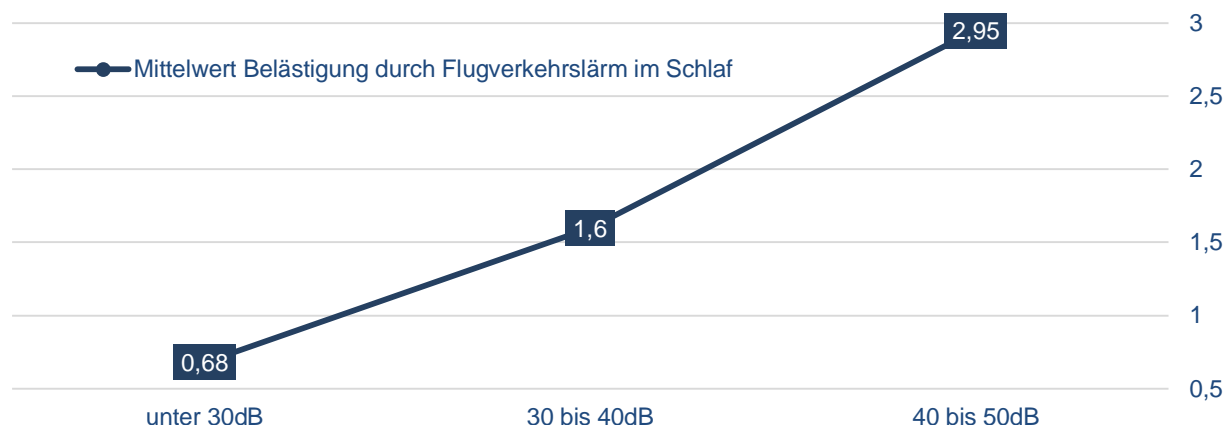

Anm.: Die Darstellung zeigt nachvollziehbare Zusammenhänge auf, enthält jedoch keine Prüfungen auf Kovariablen und andere Prädiktoren und ist somit nicht den Dosis-Wirkungskurven aus der gängigen Fachliteratur gleichzusetzen.

## 6.2. Fluglärmbelästigung im Schlaf und Katastralgemeinden

Entsprechend der gegebenen Fluglärmbelastung zeigt sich auch in der Nacht das stärkste Fluglärm-belästigungsempfinden in Hötting. Die geringste Störung durch Fluglärm im eigenen Wohnumfeld nehmen die Befragten in Igls, Mühlau und Vill wahr:

**Abbildung 206: Fluglärmbelästigung im Schlaf und Katastralgemeinden im Mittelwertvergleich**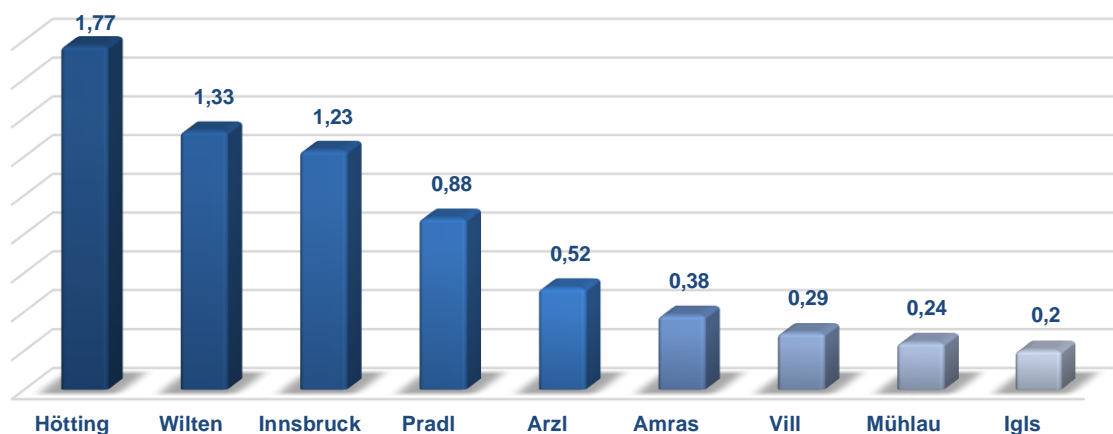

## 6.3. Fluglärmbelästigung im Schlaf und ausgewählte Parameter

Wie schon bei der Frage nach der Belästigung durch Flugverkehrslärm allgemein, sind die Unterschiede in den diversen Subgruppen für die demographischen Parameter vergleichsweise gering ausgeprägt. Ein deutlicher Bezug besteht hingegen zum höchsten (bisher) erreichten Schulabschluss. Je höher dieser ausfällt, desto stärker wird auch eine Belästigung im Schlaf durch Flugverkehrslärm wahrgenommen:

**Tabelle 153: Belästigung im Schlaf durch Flugverkehrslärm und höchster erreichter Bildungsabschluss im Mittelwertvergleich**

| Bildungsschicht           | Mittelwert | N    | Standardabweichung | Standardfehler Mittelwert |
|---------------------------|------------|------|--------------------|---------------------------|
| Primärer Schulabschluss   | ,66        | 98   | 1,805              | ,182                      |
| Sekundärer Schulabschluss | 1,00       | 542  | 2,110              | ,091                      |
| Tertiärer Schulabschluss  | 1,32       | 388  | 2,469              | ,125                      |
| Insgesamt                 | 1,09       | 1028 | 2,234              | ,070                      |

In der Zusammenschau mit verschiedenen Items entsprechen die Analysen weitestgehend den zu anderen Belästigungslärmquellen gemachten Auswertungen. Baulicher Schutz vor Verkehrslärm durch vorgelagerte Gebäude, Mauern etc. ist für die Belästigung durch Fluglärm von geringerer Bedeutung im Vergleich zu anderen Verkehrslärmquellen:

**Tabelle 154: Belästigung im Schlaf durch Flugverkehrslärm und ausgewählte Parameter**

|                                               |                           | Belästigung im Schlaf Fluglärm gruppiert |            |                        |            |                 |            |
|-----------------------------------------------|---------------------------|------------------------------------------|------------|------------------------|------------|-----------------|------------|
|                                               |                           | Gering belästigt                         |            | Mittelgradig belästigt |            | Stark belästigt |            |
|                                               |                           | Anzahl                                   | Zeilen (%) | Anzahl                 | Zeilen (%) | Anzahl          | Zeilen (%) |
| <b>Geschlecht</b>                             | weiblich                  | 462                                      | 85,4%      | 61                     | 11,3%      | 18              | 3,3%       |
|                                               | männlich                  | 408                                      | 83,3%      | 60                     | 12,2%      | 22              | 4,5%       |
| <b>Altersgruppen</b>                          | 18 bis 40 Jahre           | 369                                      | 83,9%      | 58                     | 13,2%      | 13              | 3,0%       |
|                                               | 41 bis 60 Jahre           | 267                                      | 84,5%      | 35                     | 11,1%      | 14              | 4,4%       |
|                                               | über 60 Jahre             | 234                                      | 85,1%      | 28                     | 10,2%      | 13              | 4,7%       |
| <b>Bildungsschicht</b>                        | Primärer Schulabschluss   | 89                                       | 90,8%      | 7                      | 7,1%       | 2               | 2,0%       |
|                                               | Sekundärer Schulabschluss | 469                                      | 86,5%      | 54                     | 10,0%      | 19              | 3,5%       |
|                                               | Tertiärer Schulabschluss  | 309                                      | 79,6%      | 60                     | 15,5%      | 19              | 4,9%       |
| <b>Haushalt mit/ohne minderjährige Kinder</b> | Haushalt ohne Kinder      | 640                                      | 84,0%      | 91                     | 11,9%      | 31              | 4,1%       |
|                                               | Haushalt mit Kindern      | 230                                      | 85,5%      | 30                     | 11,2%      | 9               | 3,3%       |
| <b>Baulicher Schutz vor Verkehrslärm</b>      | Keiner bis geringfügig    | 639                                      | 83,4%      | 92                     | 12,0%      | 35              | 4,6%       |
|                                               | Gut bis komplett          | 203                                      | 86,0%      | 28                     | 11,9%      | 5               | 2,1%       |
| <b>Innenhof bzw. lärm-abgewandte Seite</b>    | Ja                        | 604                                      | 86,2%      | 80                     | 11,4%      | 17              | 2,4%       |
|                                               | Nein                      | 247                                      | 80,2%      | 39                     | 12,7%      | 22              | 7,1%       |
| <b>Nachtschlaf</b>                            | Fenster geöffnet/gekippt  | 701                                      | 85,4%      | 90                     | 11,0%      | 30              | 3,7%       |
|                                               | Fenster geschlossen       | 162                                      | 80,2%      | 30                     | 14,9%      | 10              | 5,0%       |
| <b>Wohnbedingungen</b>                        | Nicht gut                 | 70                                       | 83,3%      | 10                     | 11,9%      | 4               | 4,8%       |
|                                               | Durchschnittlich          | 458                                      | 82,5%      | 78                     | 14,1%      | 19              | 3,4%       |
|                                               | Sehr gut                  | 341                                      | 87,4%      | 32                     | 8,2%       | 17              | 4,4%       |
| <b>Bedingungen für Kinder</b>                 | Nicht gut                 | 33                                       | 70,2%      | 10                     | 21,3%      | 4               | 8,5%       |
|                                               | Durchschnittlich          | 430                                      | 83,5%      | 65                     | 12,6%      | 20              | 3,9%       |
|                                               | Sehr gut                  | 390                                      | 87,2%      | 41                     | 9,2%       | 16              | 3,6%       |
| <b>Verbundenheit zu Innsbruck</b>             | Nicht verbunden           | 41                                       | 74,5%      | 10                     | 18,2%      | 4               | 7,3%       |
|                                               | Durchschnittlich          | 315                                      | 83,1%      | 51                     | 13,5%      | 13              | 3,4%       |
|                                               | Sehr verbunden            | 512                                      | 86,1%      | 60                     | 10,1%      | 23              | 3,9%       |

|                                                                       |                         |     |       |       |       |    |       |
|-----------------------------------------------------------------------|-------------------------|-----|-------|-------|-------|----|-------|
| <b>Zufriedenheit eigene Wohnsituation</b>                             | Nicht zufrieden         | 22  | 78,6% | 4 (*) | 14,3% | 2  | 7,1%  |
|                                                                       | Durchschnittlich        | 206 | 79,8% | 38    | 14,7% | 14 | 5,4%  |
|                                                                       | Sehr zufrieden          | 641 | 86,2% | 79    | 10,6% | 24 | 3,2%  |
| <b>Lebensbedingungen (Summenscore)</b>                                | Nicht gut (*)           | 2   | 40,0% | 2     | 40,0% | 1  | 20,0% |
|                                                                       | Durchschnittlich        | 551 | 82,2% | 90    | 13,4% | 29 | 4,3%  |
|                                                                       | Sehr gut                | 317 | 89,0% | 29    | 8,1%  | 10 | 2,8%  |
| <b>Lebensqualität</b>                                                 | Nicht gut (*)           | 5   | 50,0% | 4     | 40,0% | 1  | 10,0% |
|                                                                       | Durchschnittlich        | 228 | 78,6% | 46    | 15,9% | 16 | 5,5%  |
|                                                                       | Sehr gut                | 633 | 87,3% | 70    | 9,7%  | 22 | 3,0%  |
| <b>Lärmempfindlichkeit</b>                                            | Nicht lärmempfindlich   | 259 | 94,2% | 12    | 4,4%  | 4  | 1,5%  |
|                                                                       | Durchschnittlich        | 478 | 81,8% | 81    | 13,9% | 25 | 4,3%  |
|                                                                       | Sehr lärmempfindlich    | 133 | 77,3% | 28    | 16,3% | 11 | 6,4%  |
| <b>Summenscore</b>                                                    | Coping ausgeprägt       | 171 | 70,7% | 50    | 20,7% | 21 | 8,7%  |
| <b>Lärmcoping</b>                                                     | Coping nicht ausgeprägt | 698 | 88,6% | 71    | 9,0%  | 19 | 2,4%  |
| <b>Gefühlte Zunahme Lärmbelastung</b>                                 | Ja                      | 338 | 77,5% | 71    | 16,3% | 27 | 6,2%  |
|                                                                       | Nein                    | 532 | 89,4% | 50    | 8,4%  | 13 | 2,2%  |
| <b>Gefühlte Abnahme Lärmbelastung</b>                                 | Ja                      | 54  | 93,1% | 4 (*) | 6,9%  | 0  | 0,0%  |
|                                                                       | Nein                    | 816 | 83,9% | 117   | 12,0% | 40 | 4,1%  |
| <b>Notwendigkeit (weiterer) Maßnahmen Lärm</b>                        | Maßnahmen notwendig     | 558 | 80,8% | 95    | 13,7% | 38 | 5,5%  |
|                                                                       | Keine Maßnahmen nötig   | 179 | 93,2% | 12    | 6,3%  | 1  | 0,5%  |
| <b>Negative Gesundheitswirkungen Lärm</b>                             | Gering                  | 202 | 93,1% | 14    | 6,5%  | 1  | 0,5%  |
|                                                                       | Stark                   | 640 | 81,9% | 104   | 13,3% | 37 | 4,7%  |
| <b>Lautheit Innsbruck im Vergleich zu anderen Städten Österreichs</b> | Ruhiger                 | 257 | 88,0% | 29    | 9,9%  | 6  | 2,1%  |
|                                                                       | Gleich                  | 464 | 84,2% | 61    | 11,1% | 26 | 4,7%  |
|                                                                       | Lauter                  | 136 | 78,2% | 30    | 17,2% | 8  | 4,6%  |
| <b>Einschätzung eigener Lärmbeitrag</b>                               | Gering                  | 665 | 85,8% | 80    | 10,3% | 30 | 3,9%  |
|                                                                       | Durchschnittlich        | 182 | 80,2% | 38    | 16,7% | 7  | 3,1%  |
|                                                                       | Groß                    | 23  | 79,3% | 3 (*) | 10,3% | 3  | 10,3% |

(\*) zu kleine Fallzahlen für solide Auswertungen

Anm.: Die Fallzahlen in der Gruppe der Starkbelästigten (*highly annoyed*, N=40) sind in einigen der obenstehenden Subgruppen zu gering für solide Auswertungen.

## 7. Belästigung im Schlaf durch Baustellenlärm

Für die Nachtstunden ist nicht von ausgeprägten Baustellentätigkeiten auszugehen, was sich auch in der Beantwortung durch die Befragten nach der Belästigung im Schlaf durch Baustellen widerspiegelt: Knapp 90% aller Befragten sehen sich überhaupt nicht bis gering von Baustellenlärm im Schlaf gestört, 2,1% gehören hingegen der Gruppe der stark im Schlaf Lärmbelästigten an. Eine Person macht zu dieser Frage keine Angaben.

Im Mittel liegen die Antworten der befragten Innsbruckerinnen und Innsbrucker bei 0,73 (8,0%):



**Abbildung 207: Belästigung durch Baustellenlärm im Schlaf in Prozent**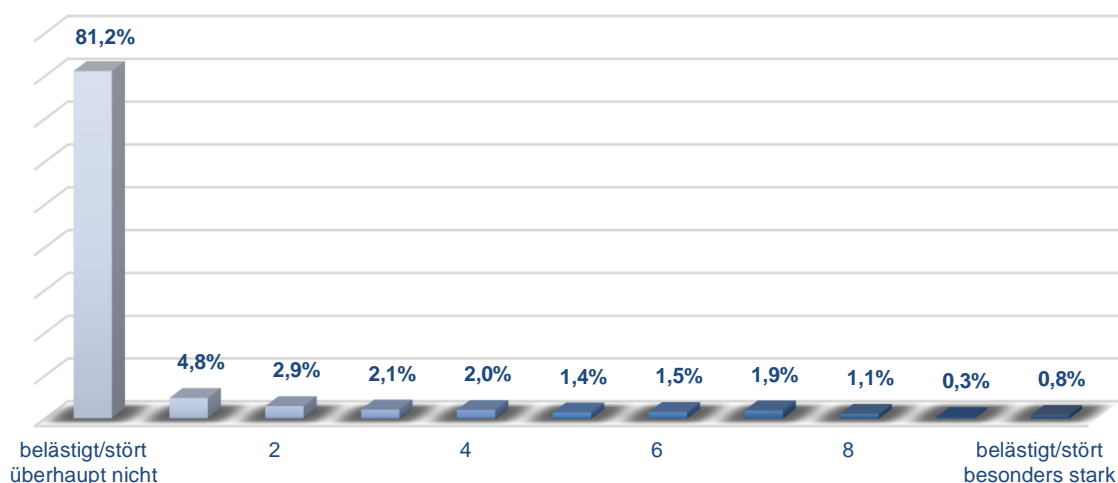**Tabelle 155: Belästigung im Schlaf durch Lärm von Baustellen gruppiert**

|                        | Häufigkeit | Gültige Prozente | Kumulierte Prozente |
|------------------------|------------|------------------|---------------------|
| Gering belästigt       | 916        | 88,8             | 88,8                |
| Mittelgradig belästigt | 92         | 8,9              | 97,8                |
| Gültig Stark belästigt | 22         | 2,1              | 99,9                |
| w.n. / k.A.            | 1          | ,1               | 100,0               |
| Gesamt                 | 1031       | 100,0            |                     |

### 7.1. Baulärmbelästigung im Schlaf und Katastralgemeinden

Baustellenlärm ist stark auf Akutbelastungen bezogen und daher ist ein Vergleich der Katastralgemeinden zu einem sehr erheblichen Anteil nur eine Momentaufnahme. Durch die geringen Belästigungsausmaße verursacht von Baustellenlärm in der Nacht, verstärkt sich dieser Effekt. Die Befragten in der Katastralgemeinde Innsbruck geben gemittelt das größte Ausmaß an Belästigung durch Baustellenlärm in der Nacht an, die befragten in Vill, Igls und Amras das niedrigste:

**Abbildung 208: Belästigung im Schlaf durch Baulärm und Katastralgemeinden im Mittelwertvergleich**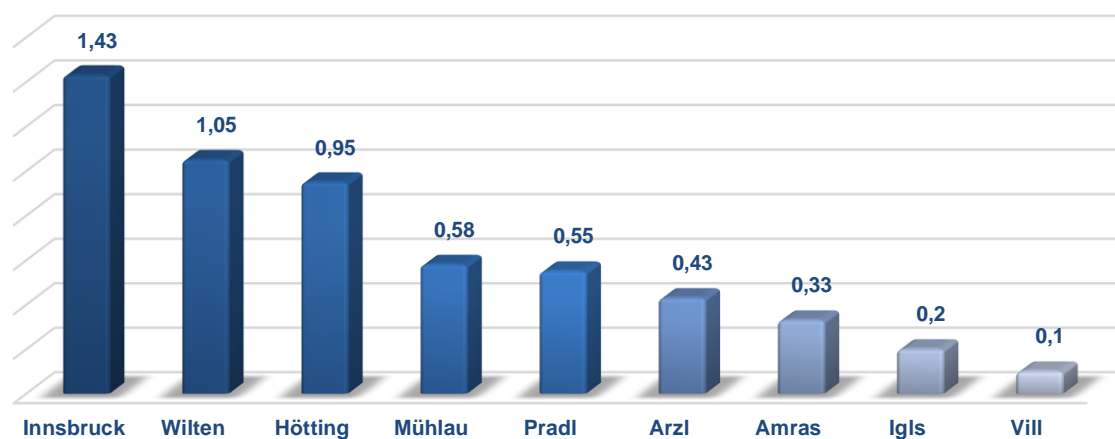

## 7.2. Baulärmbelästigung im Schlaf und ausgewählte Parameter

Die Unterschiede zwischen den einzelnen Subgruppen in der Kombination mit anderen Items sind insgesamt geringer ausgeprägt als bei anderen Belästigungslärmquellen.

Im Folgenden einige ausgewählte Parameter, jeweils in 3 Belästigungsgruppen zusammengefasst, in Zusammenschau mit der Belästigung im Schlaf durch Baulärm:

**Tabelle 156: Belästigung im Schlaf durch Baustellenlärm und ausgewählte Parameter**

|                                            |                           | Belästigung im Schlaf Lärm von Baustellen gruppiert |            |                        |            |                 |            |
|--------------------------------------------|---------------------------|-----------------------------------------------------|------------|------------------------|------------|-----------------|------------|
|                                            |                           | Gering belästigt                                    |            | Mittelgradig belästigt |            | Stark belästigt |            |
|                                            |                           | Anzahl                                              | Zeilen (%) | Anzahl                 | Zeilen (%) | Anzahl          | Zeilen (%) |
| <b>Geschlecht</b>                          | weiblich                  | 483                                                 | 89,3%      | 48                     | 8,9%       | 10              | 1,8%       |
|                                            | männlich                  | 433                                                 | 88,5%      | 44                     | 9,0%       | 12              | 2,5%       |
| <b>Altersgruppen</b>                       | 18 bis 40 Jahre           | 378                                                 | 86,1%      | 48                     | 10,9%      | 13              | 3,0%       |
|                                            | 41 bis 60 Jahre           | 281                                                 | 88,9%      | 28                     | 8,9%       | 7               | 2,2%       |
|                                            | über 60 Jahre             | 257                                                 | 93,5%      | 16                     | 5,8%       | 2               | 0,7%       |
| <b>Bildungsschicht</b>                     | Primärer Schulabschluss   | 92                                                  | 93,9%      | 5                      | 5,1%       | 1               | 1,0%       |
|                                            | Sekundärer Schulabschluss | 477                                                 | 88,0%      | 57                     | 10,5%      | 8               | 1,5%       |
|                                            | Tertiärer Schulabschluss  | 344                                                 | 88,9%      | 30                     | 7,8%       | 13              | 3,4%       |
| <b>Baulicher Schutz vor Verkehrslärm</b>   | Keiner bis geringfügig    | 674                                                 | 88,1%      | 73                     | 9,5%       | 18              | 2,4%       |
|                                            | Gut bis komplett          | 216                                                 | 91,5%      | 18                     | 7,6%       | 2               | 0,8%       |
| <b>Innenhof bzw. lärm-abgewandte Seite</b> | Ja                        | 625                                                 | 89,2%      | 67                     | 9,6%       | 9               | 1,3%       |
|                                            | Nein                      | 270                                                 | 87,9%      | 24                     | 7,8%       | 13              | 4,2%       |
| <b>Nachtschlaf</b>                         | Fenster geöffnet/gekippt  | 735                                                 | 89,6%      | 64                     | 7,8%       | 21              | 2,6%       |
|                                            | Fenster geschlossen       | 174                                                 | 86,1%      | 27                     | 13,4%      | 1               | 0,5%       |
| <b>Wohnbedingungen</b>                     | Nicht gut                 | 73                                                  | 86,9%      | 9                      | 10,7%      | 2               | 2,4%       |
|                                            | Durchschnittlich          | 492                                                 | 88,6%      | 54                     | 9,7%       | 9               | 1,6%       |
|                                            | Sehr gut                  | 350                                                 | 90,0%      | 28                     | 7,2%       | 11              | 2,8%       |
| <b>Bedingungen für Kinder</b>              | Nicht gut                 | 37                                                  | 78,7%      | 8                      | 17,0%      | 2               | 4,3%       |
|                                            | Durchschnittlich          | 451                                                 | 87,7%      | 53                     | 10,3%      | 10              | 1,9%       |
|                                            | Sehr gut                  | 410                                                 | 91,7%      | 27                     | 6,0%       | 10              | 2,2%       |
| <b>Verbundenheit zu Innsbruck</b>          | Nicht verbunden           | 48                                                  | 87,3%      | 6                      | 10,9%      | 1               | 1,8%       |
|                                            | Durchschnittlich          | 327                                                 | 86,5%      | 41                     | 10,8%      | 10              | 2,6%       |
|                                            | Sehr verbunden            | 539                                                 | 90,6%      | 45                     | 7,6%       | 11              | 1,8%       |
| <b>Zufriedenheit eigene Wohnsituation</b>  | Nicht zufrieden           | 25                                                  | 89,3%      | 3 (*)                  | 10,7%      | 0               | 0,0%       |
|                                            | Durchschnittlich          | 208                                                 | 80,6%      | 36                     | 14,0%      | 14              | 5,4%       |
|                                            | Sehr zufrieden            | 682                                                 | 91,8%      | 53                     | 7,1%       | 8               | 1,1%       |
| <b>Lebensbedingungen (Summenscore)</b>     | Nicht gut (*)             | 4                                                   | 80,0%      | 1                      | 20,0%      | 0               | 0,0%       |
|                                            | Durchschnittlich          | 588                                                 | 87,9%      | 67                     | 10,0%      | 14              | 2,1%       |
|                                            | Sehr gut                  | 324                                                 | 91,0%      | 24                     | 6,7%       | 8               | 2,2%       |
| <b>Lebensqualität</b>                      | Nicht gut (*)             | 8                                                   | 80,0%      | 1                      | 10,0%      | 1               | 10,0%      |
|                                            | Durchschnittlich          | 251                                                 | 86,6%      | 33                     | 11,4%      | 6               | 2,1%       |
|                                            | Sehr gut                  | 653                                                 | 90,1%      | 57                     | 7,9%       | 15              | 2,1%       |

|                                                                       |                         |     |       |       |       |    |      |
|-----------------------------------------------------------------------|-------------------------|-----|-------|-------|-------|----|------|
|                                                                       | Nicht lärmempfindlich   | 253 | 92,0% | 18    | 6,5%  | 4  | 1,5% |
| <b>Lärmempfindlichkeit</b>                                            | Durchschnittlich        | 508 | 87,0% | 62    | 10,6% | 14 | 2,4% |
|                                                                       | Sehr lärmempfindlich    | 155 | 90,6% | 12    | 7,0%  | 4  | 2,3% |
| <b>Summenscore</b>                                                    | Coping ausgeprägt       | 194 | 80,2% | 36    | 14,9% | 12 | 5,0% |
| <b>Lärmcoping</b>                                                     | Coping nicht ausgeprägt | 722 | 91,7% | 56    | 7,1%  | 9  | 1,1% |
| <b>Gefühlte Zunahme</b>                                               | Ja                      | 359 | 82,3% | 60    | 13,8% | 17 | 3,9% |
| <b>Lärmbelastung</b>                                                  | Nein                    | 557 | 93,8% | 32    | 5,4%  | 5  | 0,8% |
| <b>Gefühlte Abnahme</b>                                               | Ja                      | 55  | 94,8% | 3     | 5,2%  | 0  | 0,0% |
| <b>Lärmbelastung</b>                                                  | Nein                    | 861 | 88,6% | 89    | 9,2%  | 22 | 2,3% |
| <b>Notwendigkeit (weiterer) Maßnahmen Lärm</b>                        | Maßnahmen notwendig     | 605 | 87,7% | 69    | 10,0% | 16 | 2,3% |
|                                                                       | Keine Maßnahmen nötig   | 177 | 92,2% | 11    | 5,7%  | 4  | 2,1% |
| <b>Negative Gesundheitswirkungen Lärm</b>                             | Gering                  | 201 | 92,6% | 14    | 6,5%  | 2  | 0,9% |
|                                                                       | Stark                   | 688 | 88,2% | 73    | 9,4%  | 19 | 2,4% |
| <b>Lautheit Innsbruck im Vergleich zu anderen Städten Österreichs</b> | Ruhiger                 | 263 | 90,1% | 24    | 8,2%  | 5  | 1,7% |
|                                                                       | Gleich                  | 489 | 88,7% | 49    | 8,9%  | 13 | 2,4% |
|                                                                       | Lauter                  | 151 | 86,8% | 19    | 10,9% | 4  | 2,3% |
| <b>Einschätzung eigener Lärmbeitrag</b>                               | Gering                  | 686 | 88,6% | 71    | 9,2%  | 17 | 2,2% |
|                                                                       | Durchschnittlich        | 205 | 90,3% | 18    | 7,9%  | 4  | 1,8% |
|                                                                       | Groß                    | 25  | 86,2% | 3 (*) | 10,3% | 1  | 3,4% |

(\*) zu kleine Fallzahlen für solide Auswertungen

Anm.: Die Fallzahlen in der Gruppe der Starkbelästigten (*highly annoyed*, N=22) sind in einigen der obenstehenden Subgruppen zu gering für solide Auswertungen.

## 8. Belästigung im Schlaf durch Schienenverkehrslärm

Keine Belästigung durch Schienenverkehrslärm im Schlaf nehmen über 83% der Befragten wahr, insgesamt sind über 90% überhaupt nicht bis gering lärmbeeinträchtigt. 1,5% sehen sich als stark vom Schienenverkehrslärm im Schlaf gestört an:

Abbildung 209: Belästigung durch Schienenverkehrslärm im Schlaf in Prozent

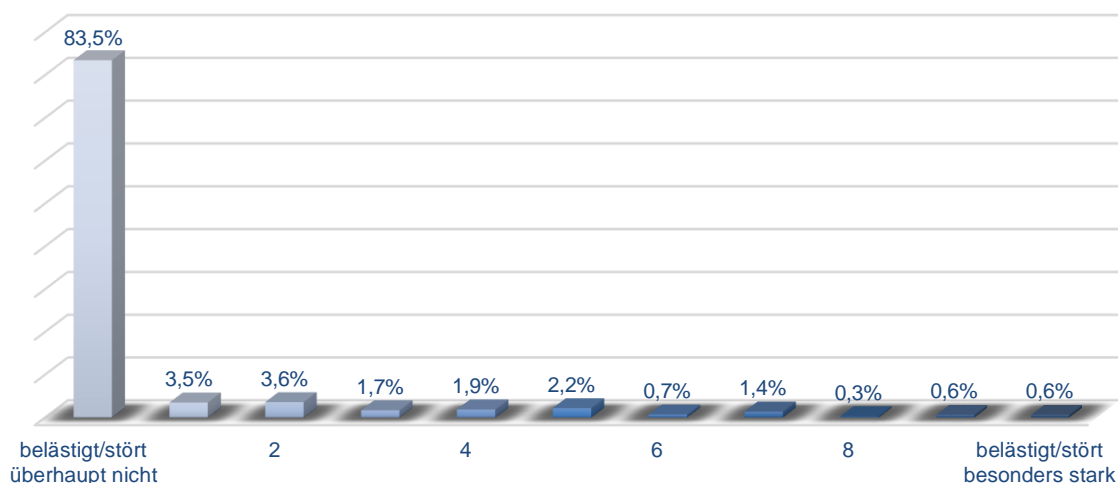

Im Mittel liegen die Antworten im befragten Kollektiv bei 0,62 (6,8%) auf der 11-teiligen Antwortskala:

**Tabelle 157: Belästigung im Schlaf durch Schienenverkehrslärm gruppiert**

|                        | Häufigkeit | Gültige Prozente | Kumulierte Prozente |
|------------------------|------------|------------------|---------------------|
| Gering belästigt       | 934        | 90,6             | 90,6                |
| Mittelgradig belästigt | 82         | 8,0              | 98,5                |
| Stark belästigt        | 15         | 1,5              | 100,0               |
| Gesamt                 | 1031       | 100,0            |                     |

### 8.1. Schienenlärmelastung im Schlaf und Schienenlärmelastung

Eine Belästigung durch den Schienenverkehrslärm im Schlaf ist bis zu Dauerbelastungen von 40dB im Wohnumfeld der Befragten de facto nicht gegeben und fällt auch bei nächtlichen Dauerlärmpegeln über 50dB vergleichsweise gering aus. Eine steigende Belästigungsreaktion (auf niedrigem Niveau) beginnt bei etwa 10dB niedrigeren Lärmpegeln als im 24h-Zeitraum einzusetzen:

**Abbildung 210: Schienenlärmelastung im Schlaf und nächtliche Schienenlärmelastung  $L_n$  in 10dB-Schritten im Mittelwertvergleich**

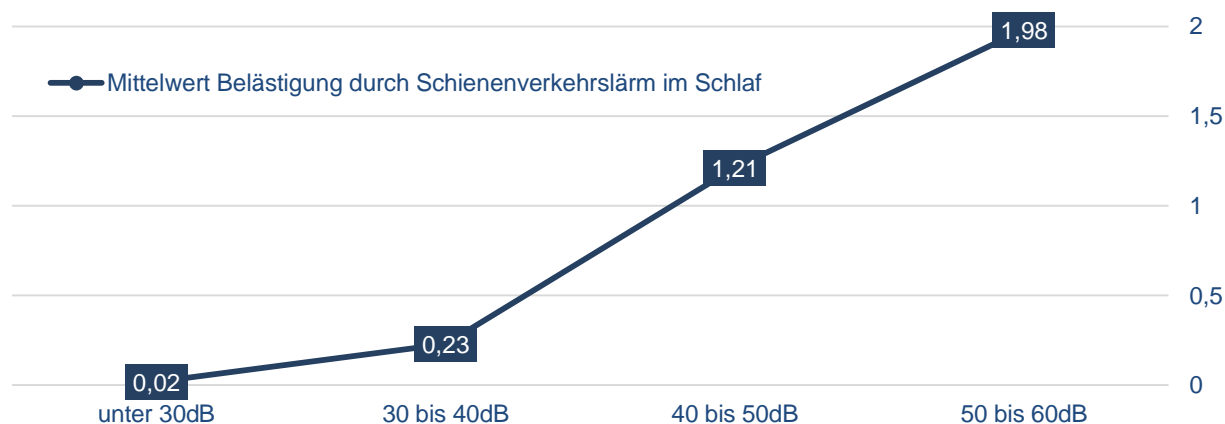

Anm.: Die Darstellung zeigt nachvollziehbare Zusammenhänge auf, enthält jedoch keine Prüfungen auf Kovariablen und andere Prädiktoren und ist somit nicht den Dosis-Wirkungskurven aus der gängigen Fachliteratur gleichzusetzen.

### 8.2. Schienenlärmelastung im Schlaf und Katastralgemeinden

Entsprechend der gegebenen Schienenverkehrslärmelastung zeigt sich auch für den Nachtzeitraum die stärkste Schienenlärmelastung in Innsbruck und Wilten. Die geringste Störung durch Schienenlärm im Schlaf im eigenen Wohnumfeld empfinden die Befragten in Igls und Vill, wo – wie schon für den 24h-Zeitraum – fast überhaupt keine Belästigung durch den Schienenverkehrslärm von den Befragten festgestellt wird:

**Abbildung 211: Schienenlärmelastung im Schlaf und Katastralgemeinden im Mittelwertvergleich**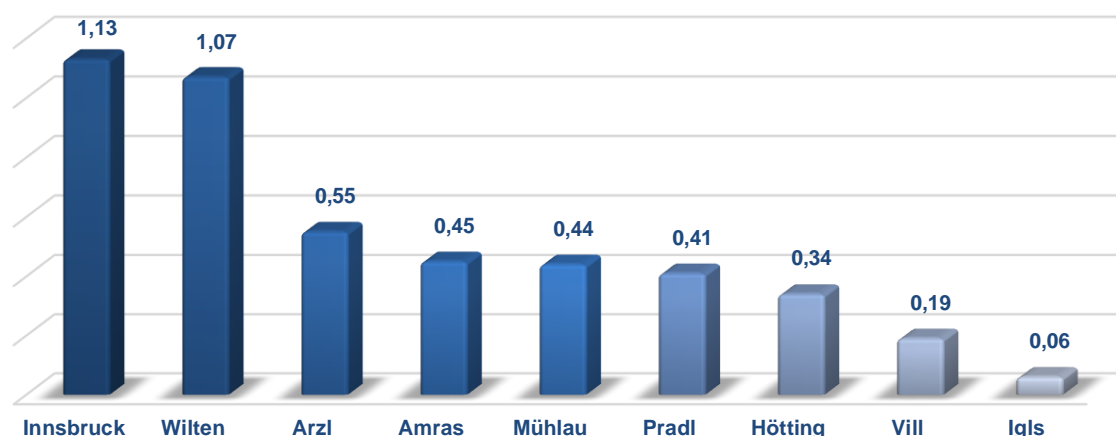

### 8.3. Schienenlärmelastung im Schlaf und ausgewählte Parameter

Die Fallzahlen im Bereich abseits der *überhaupt nicht* oder nur sehr geringfügig im Schlaf durch Schienenverkehrslärm belästigten Befragten sind ausgesprochen klein, weshalb nur sehr eingeschränkt gültige Ableitungen aus bi- und multivariaten Auswertungen zulässig sind. Größere Auffälligkeiten im Vergleich zu den anderen Belästigungslärmquellen oder der Frage nach der Belästigung durch Schienenverkehrslärm allgemein konnten nicht festgemacht werden.

Im Folgenden einige ausgewählte Parameter, jeweils in 3 Belästigungsgruppen zusammengefasst, in Zusammenschau mit der Belästigung im Schlaf durch Schienenverkehrslärm:

**Tabelle 158: Belästigung im Schlaf durch Schienenverkehrslärm und ausgewählte Parameter**

|                                               |                           | Belästigung im Schlaf Schienenverkehrslärm gruppiert |            |                        |            |                 |            |
|-----------------------------------------------|---------------------------|------------------------------------------------------|------------|------------------------|------------|-----------------|------------|
|                                               |                           | Gering belästigt                                     |            | Mittelgradig belästigt |            | Stark belästigt |            |
|                                               |                           | Anzahl                                               | Zeilen (%) | Anzahl                 | Zeilen (%) | Anzahl          | Zeilen (%) |
| <b>Geschlecht</b>                             | weiblich                  | 491                                                  | 90,8%      | 40                     | 7,4%       | 10              | 1,8%       |
|                                               | männlich                  | 443                                                  | 90,4%      | 42                     | 8,6%       | 5               | 1,0%       |
| <b>Altersgruppen</b>                          | 18 bis 40 Jahre           | 395                                                  | 89,8%      | 38                     | 8,6%       | 7               | 1,6%       |
|                                               | 41 bis 60 Jahre           | 285                                                  | 90,2%      | 24                     | 7,6%       | 7               | 2,2%       |
|                                               | über 60 Jahre             | 254                                                  | 92,4%      | 20                     | 7,3%       | 1               | 0,4%       |
| <b>Bildungsschicht</b>                        | Primärer Schulabschluss   | 92                                                   | 93,9%      | 6                      | 6,1%       | 0               | 0,0%       |
|                                               | Sekundärer Schulabschluss | 496                                                  | 91,5%      | 40                     | 7,4%       | 6               | 1,1%       |
|                                               | Tertiärer Schulabschluss  | 343                                                  | 88,4%      | 36                     | 9,3%       | 9               | 2,3%       |
| <b>Haushalt mit/ohne minderjährige Kinder</b> | Haushalt ohne Kinder      | 693                                                  | 90,9%      | 59                     | 7,7%       | 10              | 1,3%       |
|                                               | Haushalt mit Kindern      | 241                                                  | 89,6%      | 23                     | 8,6%       | 5               | 1,9%       |
| <b>Baulicher Schutz vor Verkehrslärm</b>      | Keiner bis geringfügig    | 685                                                  | 89,4%      | 68                     | 8,9%       | 13              | 1,7%       |
|                                               | Gut bis komplett          | 222                                                  | 94,1%      | 12                     | 5,1%       | 2               | 0,8%       |
| <b>Innenhof bzw. lärm-abgewandte Seite</b>    | Ja                        | 637                                                  | 90,9%      | 56                     | 8,0%       | 8               | 1,1%       |
|                                               | Nein                      | 277                                                  | 89,9%      | 24                     | 7,8%       | 7               | 2,3%       |
| <b>Nachtschlaf</b>                            | Fenster geöffnet/gekippt  | 756                                                  | 92,1%      | 58                     | 7,1%       | 7               | 0,9%       |

|                                                                       |                         |     |        |       |       |    |       |
|-----------------------------------------------------------------------|-------------------------|-----|--------|-------|-------|----|-------|
|                                                                       | Fenster geschlossen     | 170 | 84,2%  | 24    | 11,9% | 8  | 4,0%  |
| <b>Wohnbedingungen</b>                                                | Nicht gut               | 75  | 89,3%  | 7     | 8,3%  | 2  | 2,4%  |
|                                                                       | Durchschnittlich        | 495 | 89,2%  | 50    | 9,0%  | 10 | 1,8%  |
|                                                                       | Sehr gut                | 363 | 93,1%  | 24    | 6,2%  | 3  | 0,8%  |
| <b>Bedingungen für Kinder</b>                                         | Nicht gut               | 41  | 87,2%  | 5     | 10,6% | 1  | 2,1%  |
|                                                                       | Durchschnittlich        | 458 | 88,9%  | 49    | 9,5%  | 8  | 1,6%  |
|                                                                       | Sehr gut                | 414 | 92,6%  | 27    | 6,0%  | 6  | 1,3%  |
| <b>Verbundenheit zu Innsbruck</b>                                     | Nicht verbunden         | 51  | 92,7%  | 3 (*) | 5,5%  | 1  | 1,8%  |
|                                                                       | Durchschnittlich        | 340 | 89,7%  | 34    | 9,0%  | 5  | 1,3%  |
|                                                                       | Sehr verbunden          | 541 | 90,9%  | 45    | 7,6%  | 9  | 1,5%  |
| <b>Zufriedenheit eigene Wohnsituation</b>                             | Nicht zufrieden         | 23  | 82,1%  | 5     | 17,9% | 0  | 0,0%  |
|                                                                       | Durchschnittlich        | 225 | 87,2%  | 28    | 10,9% | 5  | 1,9%  |
|                                                                       | Sehr zufrieden          | 685 | 92,1%  | 49    | 6,6%  | 10 | 1,3%  |
| <b>Lebensbedingungen (Summenscore)</b>                                | Nicht gut (*)           | 2   | 40,0%  | 2     | 40,0% | 1  | 20,0% |
|                                                                       | Durchschnittlich        | 594 | 88,7%  | 64    | 9,6%  | 12 | 1,8%  |
|                                                                       | Sehr gut                | 338 | 94,9%  | 16    | 4,5%  | 2  | 0,6%  |
| <b>Lebensqualität</b>                                                 | Nicht gut (*)           | 10  | 100,0% | 0     | 0,0%  | 0  | 0,0%  |
|                                                                       | Durchschnittlich        | 255 | 87,9%  | 31    | 10,7% | 4  | 1,4%  |
|                                                                       | Sehr gut                | 665 | 91,7%  | 49    | 6,8%  | 11 | 1,5%  |
| <b>Lärmempfindlichkeit</b>                                            | Nicht lärmempfindlich   | 261 | 94,9%  | 12    | 4,4%  | 2  | 0,7%  |
|                                                                       | Durchschnittlich        | 519 | 88,9%  | 55    | 9,4%  | 10 | 1,7%  |
|                                                                       | Sehr lärmempfindlich    | 154 | 89,5%  | 15    | 8,7%  | 3  | 1,7%  |
| <b>Summenscore Lärmcoping</b>                                         | Coping ausgeprägt       | 193 | 79,8%  | 39    | 16,1% | 10 | 4,1%  |
|                                                                       | Coping nicht ausgeprägt | 740 | 93,9%  | 43    | 5,5%  | 5  | 0,6%  |
| <b>Gefühlte Zunahme Lärmbelastung</b>                                 | Ja                      | 383 | 87,8%  | 42    | 9,6%  | 11 | 2,5%  |
|                                                                       | Nein                    | 551 | 92,6%  | 40    | 6,7%  | 4  | 0,7%  |
| <b>Gefühlte Abnahme Lärmbelastung</b>                                 | Ja                      | 52  | 89,7%  | 6     | 10,3% | 0  | 0,0%  |
|                                                                       | Nein                    | 882 | 90,6%  | 76    | 7,8%  | 15 | 1,5%  |
| <b>Notwendigkeit (weiterer) Maßnahmen Lärm</b>                        | Maßnahmen notwendig     | 609 | 88,1%  | 69    | 10,0% | 13 | 1,9%  |
|                                                                       | Keine Maßnahmen nötig   | 185 | 96,4%  | 7     | 3,6%  | 0  | 0,0%  |
| <b>Negative Gesundheitswirkungen Lärm</b>                             | Gering                  | 201 | 92,6%  | 13    | 6,0%  | 3  | 1,4%  |
|                                                                       | Stark                   | 701 | 89,8%  | 68    | 8,7%  | 12 | 1,5%  |
| <b>Lautheit Innsbruck im Vergleich zu anderen Städten Österreichs</b> | Ruhiger                 | 274 | 93,8%  | 16    | 5,5%  | 2  | 0,7%  |
|                                                                       | Gleich                  | 495 | 89,8%  | 44    | 8,0%  | 12 | 2,2%  |
|                                                                       | Lauter                  | 151 | 86,8%  | 22    | 12,6% | 1  | 0,6%  |
| <b>Einschätzung eigener Lärmbeitrag</b>                               | Gering                  | 704 | 90,8%  | 56    | 7,2%  | 15 | 1,9%  |
|                                                                       | Durchschnittlich        | 203 | 89,4%  | 24    | 10,6% | 0  | 0,0%  |
|                                                                       | Groß                    | 27  | 93,1%  | 2 (*) | 6,9%  | 0  | 0,0%  |

(\*) zu kleine Fallzahlen für solide Auswertungen

Anm.: Die Fallzahlen in der Gruppe der Starkbelästigten (*highly annoyed*, N=15) sind in einigen der obenstehenden Subgruppen zu gering für solide Auswertungen.

## 9. Belästigung im Schlaf durch Erschütterungen

Die Belästigungsausprägungen durch Erschütterungen im Schlaf sind in ihren Dimensionen nahezu deckungsgleich jenen des Schienenverkehrslärms und fallen sehr gering aus. Im Mittel liegen die Antworten der Befragten bei 0,53 (5,8%):

**Abbildung 212: Belästigung durch Erschütterungen im Schlaf in Prozent**

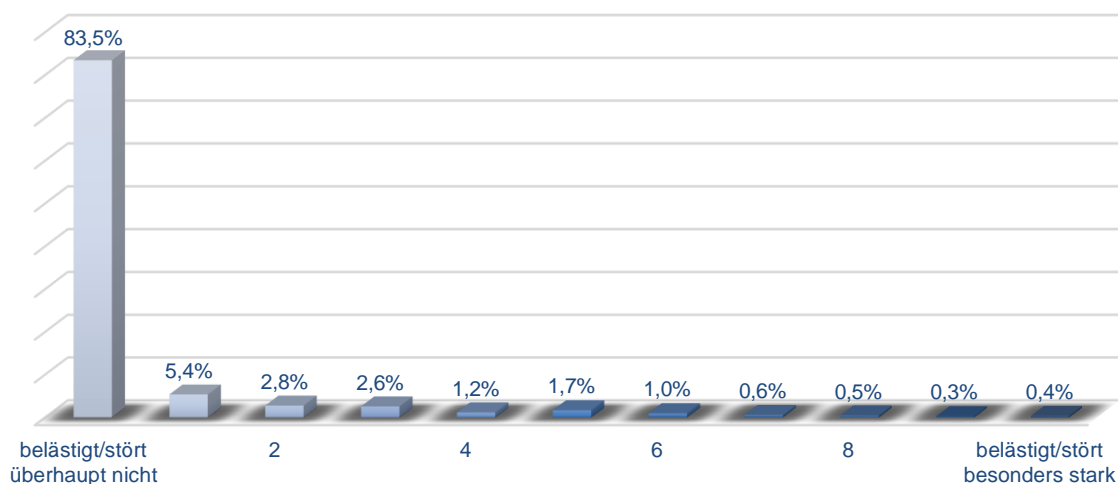

**Tabelle 159: Belästigung im Schlaf durch Erschütterungen gruppiert**

|                        | Häufigkeit | Gültige Prozente | Kumulierte Prozente |
|------------------------|------------|------------------|---------------------|
| Gering belästigt       | 946        | 91,8             | 91,8                |
| Mittelgradig belästigt | 73         | 7,1              | 98,8                |
| Stark belästigt        | 12         | 1,2              | 100,0               |
| Gesamt                 | 1031       | 100,0            |                     |

### 9.1. Belästigung im Schlaf durch Erschütterungen und Katastralgemeinden

**Abbildung 213: Belästigung im Schlaf durch Erschütterungen und Katastralgemeinden im Mittelwertvergleich**

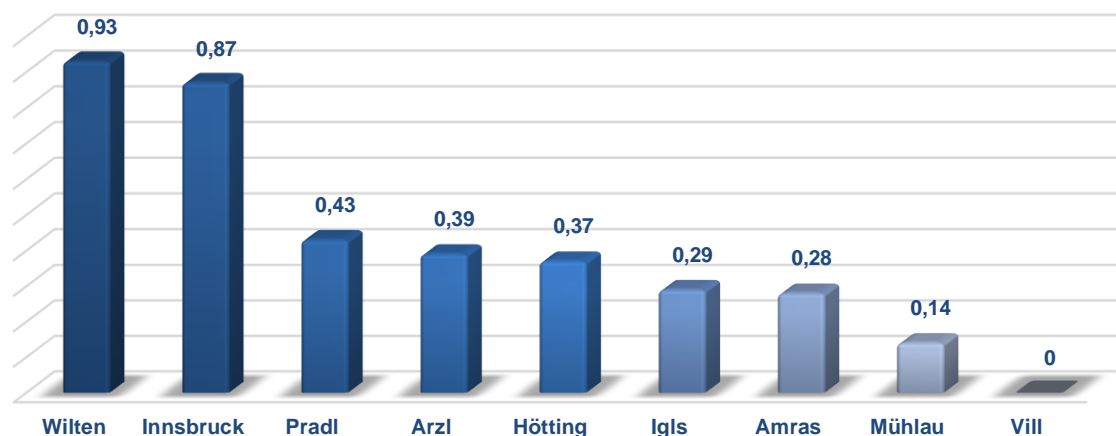

Das größte Ausmaß an Belästigung im Schlaf durch Erschütterungen wird in Wilten und Innsbruck empfunden, das geringste in Vill und Mühlau.

## 9.2. Belästigung im Schlaf durch Erschütterungen und ausgewählte Parameter

Die Auswertungen zur Belästigung im Schlaf durch Erschütterungen zeigen keine größeren Auffälligkeiten im Vergleich zu den anderen Belästigungslärmquellen. Die Fallzahlen in der Extremgruppe der Starkbelästigten (*highly annoyed*, N=12) sind zu gering für solide Auswertungen, weshalb diese Gruppe in der untenstehenden Tabelle ganz ausgespart wurde.

Im Folgenden einige ausgewählte Parameter, jeweils in die beiden Gruppen der gering und der mittelgradig Belasteten zusammengefasst, in Zusammenschau mit der Belästigung im Schlaf durch Erschütterungen:

**Tabelle 160: Belästigung im Schlaf durch Erschütterungen und ausgewählte Parameter**

|                                               |                           | Belästigung im Schlaf Erschütterungen gesamt gruppiert |            |                        |            |
|-----------------------------------------------|---------------------------|--------------------------------------------------------|------------|------------------------|------------|
|                                               |                           | Gering belästigt                                       |            | Mittelgradig belästigt |            |
|                                               |                           | Anzahl                                                 | Zeilen (%) | Anzahl                 | Zeilen (%) |
| <b>Geschlecht</b>                             | weiblich                  | 497                                                    | 91,9%      | 35                     | 6,5%       |
|                                               | männlich                  | 449                                                    | 91,6%      | 38                     | 7,8%       |
| <b>Altersgruppen</b>                          | 18 bis 40 Jahre           | 404                                                    | 91,8%      | 31                     | 7,0%       |
|                                               | 41 bis 60 Jahre           | 281                                                    | 88,9%      | 29                     | 9,2%       |
|                                               | über 60 Jahre             | 261                                                    | 94,9%      | 13                     | 4,7%       |
| <b>Bildungsschicht</b>                        | Primärer Schulabschluss   | 92                                                     | 93,9%      | 5                      | 5,1%       |
|                                               | Sekundärer Schulabschluss | 495                                                    | 91,3%      | 42                     | 7,7%       |
|                                               | Tertiärer Schulabschluss  | 356                                                    | 91,8%      | 26                     | 6,7%       |
| <b>Haushalt mit/ohne minderjährige Kinder</b> | Haushalt ohne Kinder      | 697                                                    | 91,5%      | 56                     | 7,3%       |
|                                               | Haushalt mit Kindern      | 249                                                    | 92,6%      | 17                     | 6,3%       |
| <b>Baulicher Schutz vor Verkehrslärm</b>      | Keiner bis geringfügig    | 695                                                    | 90,7%      | 59                     | 7,7%       |
|                                               | Gut bis komplett          | 223                                                    | 94,5%      | 13                     | 5,5%       |
| <b>Innenhof bzw. lärm-abgewandte Seite</b>    | Ja                        | 646                                                    | 92,2%      | 46                     | 6,6%       |
|                                               | Nein                      | 279                                                    | 90,6%      | 26                     | 8,4%       |
| <b>Nachtschlaf</b>                            | Fenster geöffnet/gekippt  | 762                                                    | 92,8%      | 51                     | 6,2%       |
|                                               | Fenster geschlossen       | 177                                                    | 87,6%      | 21                     | 10,4%      |
| <b>Wohnbedingungen</b>                        | Nicht gut                 | 74                                                     | 88,1%      | 7                      | 8,3%       |
|                                               | Durchschnittlich          | 505                                                    | 91,0%      | 43                     | 7,7%       |
|                                               | Sehr gut                  | 365                                                    | 93,6%      | 23                     | 5,9%       |
| <b>Bedingungen für Kinder</b>                 | Nicht gut                 | 34                                                     | 72,3%      | 10                     | 21,3%      |
|                                               | Durchschnittlich          | 469                                                    | 91,1%      | 39                     | 7,6%       |
|                                               | Sehr gut                  | 423                                                    | 94,6%      | 22                     | 4,9%       |
| <b>Verbundenheit zu</b>                       | Nicht verbunden           | 44                                                     | 80,0%      | 8                      | 14,5%      |



|                                                                       |                         |     |        |       |       |
|-----------------------------------------------------------------------|-------------------------|-----|--------|-------|-------|
| <b>Innsbruck</b>                                                      | Durchschnittlich        | 347 | 91,6%  | 29    | 7,7%  |
|                                                                       | Sehr verbunden          | 553 | 92,9%  | 36    | 6,1%  |
| <b>Zufriedenheit eigene Wohnsituation</b>                             | Nicht zufrieden         | 23  | 82,1%  | 3 (*) | 10,7% |
|                                                                       | Durchschnittlich        | 222 | 86,0%  | 28    | 10,9% |
|                                                                       | Sehr zufrieden          | 700 | 94,1%  | 42    | 5,6%  |
| <b>Lebensbedingungen (Summenscore)</b>                                | Nicht gut (*)           | 5   | 100,0% | 0     | 0,0%  |
|                                                                       | Durchschnittlich        | 601 | 89,7%  | 58    | 8,7%  |
|                                                                       | Sehr gut                | 340 | 95,5%  | 15    | 4,2%  |
| <b>Lebensqualität</b>                                                 | Nicht gut (*)           | 6   | 60,0%  | 2     | 20,0% |
|                                                                       | Durchschnittlich        | 260 | 89,7%  | 24    | 8,3%  |
|                                                                       | Sehr gut                | 675 | 93,1%  | 46    | 6,3%  |
| <b>Lärmempfindlichkeit</b>                                            | Nicht lärmempfindlich   | 262 | 95,3%  | 10    | 3,6%  |
|                                                                       | Durchschnittlich        | 531 | 90,9%  | 48    | 8,2%  |
|                                                                       | Sehr lärmempfindlich    | 153 | 89,0%  | 15    | 8,7%  |
| <b>Summenscore</b>                                                    | Coping ausgeprägt       | 198 | 81,8%  | 38    | 15,7% |
| <b>Lärmcoping</b>                                                     | Coping nicht ausgeprägt | 748 | 94,9%  | 35    | 4,4%  |
| <b>Gefühlte Zunahme Lärmbelastung</b>                                 | Ja                      | 387 | 88,8%  | 40    | 9,2%  |
| <b>Gefühlte Abnahme Lärmbelastung</b>                                 | Nein                    | 559 | 93,9%  | 33    | 5,5%  |
| <b>Gefühlte Zunahme Lärmbelastung</b>                                 | Ja                      | 56  | 96,6%  | 2 (*) | 3,4%  |
| <b>Gefühlte Abnahme Lärmbelastung</b>                                 | Nein                    | 890 | 91,5%  | 71    | 7,3%  |
| <b>Notwendigkeit (weiterer) Maßnahmen Lärm</b>                        | Maßnahmen notwendig     | 618 | 89,4%  | 61    | 8,8%  |
|                                                                       | Keine Maßnahmen nötig   | 184 | 95,8%  | 8     | 4,2%  |
| <b>Negative Gesundheitswirkungen Lärm</b>                             | Gering                  | 212 | 97,7%  | 4 (*) | 1,8%  |
|                                                                       | Stark                   | 702 | 89,9%  | 68    | 8,7%  |
| <b>Lautheit Innsbruck im Vergleich zu anderen Städten Österreichs</b> | Ruhiger                 | 275 | 94,2%  | 17    | 5,8%  |
|                                                                       | Gleich                  | 508 | 92,2%  | 32    | 5,8%  |
|                                                                       | Lauter                  | 149 | 85,6%  | 24    | 13,8% |
| <b>Einschätzung eigener Lärmbeitrag</b>                               | Gering                  | 714 | 92,1%  | 52    | 6,7%  |
|                                                                       | Durchschnittlich        | 207 | 91,2%  | 18    | 7,9%  |
|                                                                       | Groß                    | 25  | 86,2%  | 3 (*) | 10,3% |

(\*) zu kleine Fallzahlen für solide Auswertungen

## 10. Belästigung im Schlaf durch Lärm aus Gewerbe und Industrie

Eine Belästigung in den Nachtstunden durch Lärm aus Gewerbe und Industrie ist für die überwiegende Mehrheit der Befragten in Innsbruck nicht vorhanden. Mehr als 90% sehen sich überhaupt nicht gestört, rund ein Prozent (10 von 1031 befragten Personen) fällt in die Gruppe der stark vom Lärm aus Gewerbe und Industrie im Schlaf Belästigten. Im Mittel liegen die Antworten im befragten Kollektiv bei 0,35 (3,9,0%) auf der 11-teiligen Antwortskala:

**Abbildung 214: Belästigung im Schlaf durch Lärm von Gewerbe und Industrie in Prozent**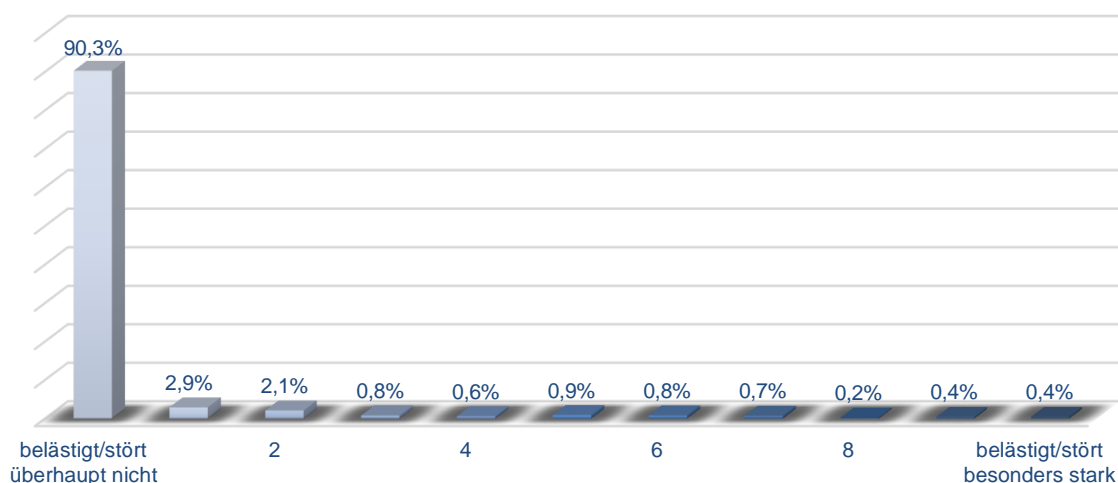**Tabelle 161: Belästigung im Schlaf durch Lärm von Gewerbe und Industrie gruppiert**

|                        | Häufigkeit | Gültige Prozente | Kumulierte Prozente |
|------------------------|------------|------------------|---------------------|
| Gering belästigt       | 983        | 95,3             | 95,3                |
| Mittelgradig belästigt | 38         | 3,7              | 99,0                |
| Stark belästigt        | 10         | 1,0              | 100,0               |
| Gesamt                 | 1031       | 100,0            |                     |

### 10.1. Belästigung im Schlaf durch Lärm von Gewerbe und Industrie und Katastralgemeinden

Die Störung im Schlaf durch Lärm von Gewerbe und Industrie ist in Mühlau und Vill am geringsten und in den Katastralgemeinden Innsbruck und Wilten am stärksten ausgeprägt:

**Abbildung 215: Belästigung im Schlaf durch Lärm von Gewerbe und Industrie und Katastralgemeinden im Mittelwertvergleich**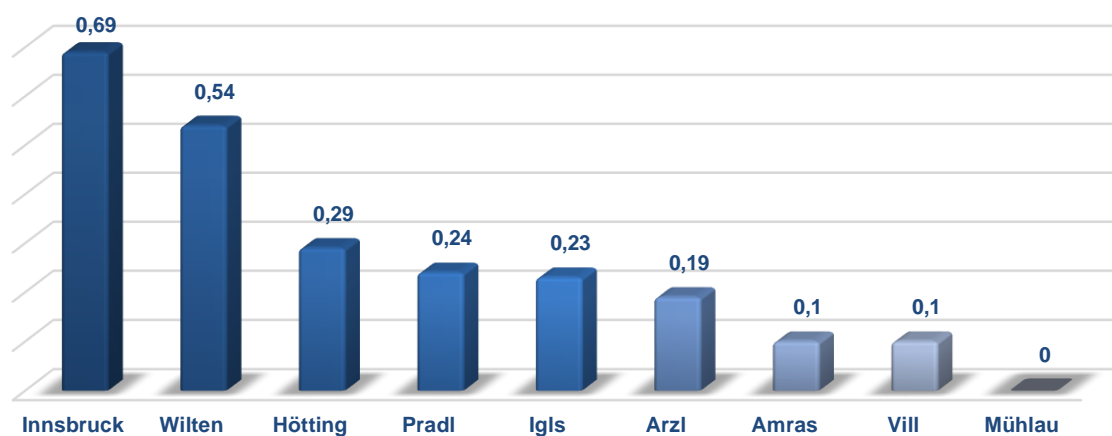

## 10.2. Belästigung im Schlaf durch Lärm von Gewerbe und Industrie und ausgewählte Parameter

Die Auswertungen zur Belästigung im Schlaf durch den Lärm von Gewerbe und Industrie zeigen keine Auffälligkeiten im Vergleich zu den anderen Belästigungslärmquellen. Allerdings sind die Fallzahlen der Mittel- und Starkbelasteten sehr gering, weshalb die Aussagekraft der Extremgruppenvergleiche stark eingeschränkt ist. Besonders in der Extremgruppe der Starkbelastigten (*highly annoyed*, N=10) sind zu wenige Fälle für solide Auswertungen enthalten, weshalb diese Gruppe in der untenstehenden Tabelle ganz ausgespart wurde.

Im Folgenden einige ausgewählte Parameter, jeweils in die beiden Gruppen der gering und der mittelgradig Belasteten zusammengefasst, in Zusammenschau mit der Belästigung im Schlaf durch den Lärm von Gewerbe und Industrie:

**Tabelle 162: Belästigung im Schlaf durch Lärm von Gewerbe / Industrie und ausgewählte Parameter**

|                                               |                           | Belästigung im Schlaf Lärm von Gewerbe und Industrie gruppiert |            |                        |            |
|-----------------------------------------------|---------------------------|----------------------------------------------------------------|------------|------------------------|------------|
|                                               |                           | Gering belästigt                                               |            | Mittelgradig belästigt |            |
|                                               |                           | Anzahl                                                         | Zeilen (%) | Anzahl                 | Zeilen (%) |
| <b>Geschlecht</b>                             | weiblich                  | 521                                                            | 96,3%      | 13                     | 2,4%       |
|                                               | männlich                  | 462                                                            | 94,3%      | 25                     | 5,1%       |
| <b>Altersgruppen</b>                          | 18 bis 40 Jahre           | 416                                                            | 94,5%      | 16                     | 3,6%       |
|                                               | 41 bis 60 Jahre           | 299                                                            | 94,6%      | 16                     | 5,1%       |
|                                               | über 60 Jahre             | 268                                                            | 97,5%      | 6                      | 2,2%       |
| <b>Bildungsschicht</b>                        | Primärer Schulabschluss   | 96                                                             | 98,0%      | 1                      | 1,0%       |
|                                               | Sekundärer Schulabschluss | 515                                                            | 95,0%      | 23                     | 4,2%       |
|                                               | Tertiärer Schulabschluss  | 369                                                            | 95,1%      | 14                     | 3,6%       |
| <b>Haushalt mit/ohne minderjährige Kinder</b> | Haushalt ohne Kinder      | 727                                                            | 95,4%      | 29                     | 3,8%       |
|                                               | Haushalt mit Kindern      | 256                                                            | 95,2%      | 9                      | 3,3%       |
| <b>Baulicher Schutz vor Verkehrslärm</b>      | Keiner bis geringfügig    | 723                                                            | 94,4%      | 33                     | 4,3%       |
|                                               | Gut bis komplett          | 232                                                            | 98,3%      | 4                      | 1,7%       |
| <b>Innenhof bzw. lärm-abgewandte Seite</b>    | Ja                        | 673                                                            | 96,0%      | 24                     | 3,4%       |
|                                               | Nein                      | 289                                                            | 93,8%      | 13                     | 4,2%       |
| <b>Nachtschlaf</b>                            | Fenster geöffnet/gekippt  | 788                                                            | 96,0%      | 28                     | 3,4%       |
|                                               | Fenster geschlossen       | 188                                                            | 93,1%      | 9                      | 4,5%       |
| <b>Wohnbedingungen</b>                        | Nicht gut                 | 79                                                             | 94,0%      | 4                      | 4,8%       |
|                                               | Durchschnittlich          | 529                                                            | 95,3%      | 20                     | 3,6%       |
|                                               | Sehr gut                  | 373                                                            | 95,6%      | 14                     | 3,6%       |
| <b>Bedingungen für Kinder</b>                 | Nicht gut                 | 41                                                             | 87,2%      | 5                      | 10,6%      |
|                                               | Durchschnittlich          | 488                                                            | 94,8%      | 18                     | 3,5%       |
|                                               | Sehr gut                  | 433                                                            | 96,9%      | 14                     | 3,1%       |
| <b>Verbundenheit zu Innsbruck</b>             | Nicht verbunden           | 47                                                             | 85,5%      | 7                      | 12,7%      |
|                                               | Durchschnittlich          | 359                                                            | 94,7%      | 14                     | 3,7%       |
|                                               | Sehr verbunden            | 575                                                            | 96,6%      | 17                     | 2,9%       |
| <b>Zufriedenheit eigene Wohnsituation</b>     | Nicht zufrieden           | 25                                                             | 89,3%      | 3                      | 10,7%      |
|                                               | Durchschnittlich          | 234                                                            | 90,7%      | 15                     | 5,8%       |

|                                                                       |                         |     |        |    |       |
|-----------------------------------------------------------------------|-------------------------|-----|--------|----|-------|
|                                                                       | Sehr zufrieden          | 723 | 97,2%  | 20 | 2,7%  |
| <b>Lebensbedingungen<br/>(Summenscore)</b>                            | Nicht gut (*)           | 4   | 80,0%  | 0  | 0,0%  |
|                                                                       | Durchschnittlich        | 632 | 94,3%  | 29 | 4,3%  |
|                                                                       | Sehr gut                | 347 | 97,5%  | 9  | 2,5%  |
| <b>Lebensqualität</b>                                                 | Nicht gut (*)           | 8   | 80,0%  | 1  | 10,0% |
|                                                                       | Durchschnittlich        | 270 | 93,1%  | 16 | 5,5%  |
|                                                                       | Sehr gut                | 700 | 96,6%  | 20 | 2,8%  |
| <b>Lärmempfindlichkeit</b>                                            | Nicht lärmempfindlich   | 268 | 97,5%  | 7  | 2,5%  |
|                                                                       | Durchschnittlich        | 552 | 94,5%  | 24 | 4,1%  |
|                                                                       | Sehr lärmempfindlich    | 163 | 94,8%  | 7  | 4,1%  |
| <b>Summenscore</b>                                                    | Coping ausgeprägt       | 212 | 87,6%  | 22 | 9,1%  |
| <b>Lärmcoping</b>                                                     | Coping nicht ausgeprägt | 770 | 97,7%  | 16 | 2,0%  |
| <b>Gefühlte Zunahme</b>                                               | Ja                      | 406 | 93,1%  | 21 | 4,8%  |
| <b>Lärmbelastung</b>                                                  | Nein                    | 577 | 97,0%  | 17 | 2,9%  |
| <b>Gefühlte Abnahme</b>                                               | Ja                      | 58  | 100,0% | 0  | 0,0%  |
| <b>Lärmbelastung</b>                                                  | Nein                    | 925 | 95,1%  | 38 | 3,9%  |
| <b>Notwendigkeit (weiterer) Maßnahmen Lärm</b>                        | Maßnahmen notwendig     | 648 | 93,8%  | 33 | 4,8%  |
|                                                                       | Keine Maßnahmen nötig   | 189 | 98,4%  | 3  | 1,6%  |
| <b>Negative Gesundheitswirkungen Lärm</b>                             | Gering                  | 216 | 99,5%  | 1  | 0,5%  |
|                                                                       | Stark                   | 735 | 94,1%  | 36 | 4,6%  |
| <b>Lautheit Innsbruck im Vergleich zu anderen Städten Österreichs</b> | Ruhiger                 | 282 | 96,6%  | 6  | 2,1%  |
|                                                                       | Gleich                  | 528 | 95,8%  | 19 | 3,4%  |
|                                                                       | Lauter                  | 159 | 91,4%  | 13 | 7,5%  |
| <b>Einschätzung eigener Lärmbeitrag</b>                               | Gering                  | 739 | 95,4%  | 28 | 3,6%  |
|                                                                       | Durchschnittlich        | 217 | 95,6%  | 9  | 4,0%  |
|                                                                       | Groß                    | 27  | 93,1%  | 1  | 3,4%  |

(\*) zu kleine Fallzahlen für solide Auswertungen

Anm.: Die Fallzahlen in der Gruppe der mittelgradig Belästigten (N=38) sind in einigen der obenstehenden Subgruppen zu gering für solide Auswertungen.

## 11. Belästigung durch Autobahnlärm im Schlaf

Autobahnlärm spielt wie schon bei der Frage nach der Belästigung allgemein auch im Nachtzeitraum für nur sehr wenige befragte Innsbruckerinnen und Innsbrucker eine größere Rolle. Nur rund 1% der 1031 Befragten stört der Autobahnlärm im Schlaf stark (*highly annoyed sleep*: gruppierte Antwortkategorien 8, 9 und 10 [=belästigt / stört besonders stark]), knapp 96% aller Befragten sehen sich selbst als nur gering im Schlaf autobahnlärm-belästigt an (gruppierte Antwortkategorien 0 [=belästigt / stört überhaupt nicht], 1 und 2), davon fast 92% überhaupt nicht belästigt.

Im Mittel liegen die Antworten der befragten Innsbruckerinnen und Innsbrucker bei 0,29 (3,2%) auf der 11-teiligen Antwortskala, was den niedersten Wert aller abgefragten Lärmquellen darstellt:

**Abbildung 216: Belästigung durch Autobahnlärm im Schlaf in Prozent**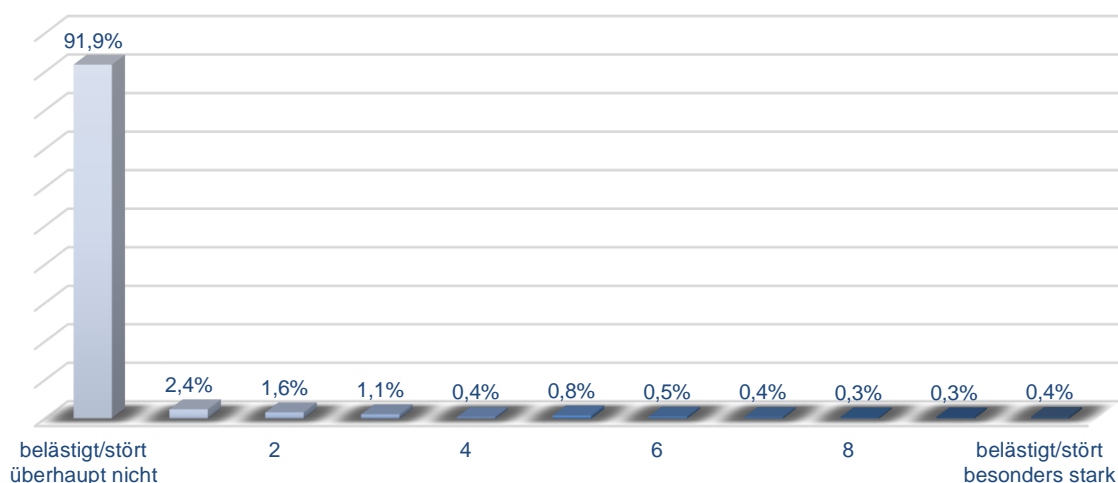**Tabelle 163: Belästigung im Schlaf durch Autobahnlärm gruppiert**

|                        | Häufigkeit | Gültige Prozente | Kumulierte Prozente |
|------------------------|------------|------------------|---------------------|
| Gering belästigt       | 989        | 95,9             | 95,9                |
| Mittelgradig belästigt | 32         | 3,1              | 99,0                |
| Stark belästigt        | 10         | 1,0              | 100,0               |
| Gesamt                 | 1031       | 100,0            |                     |

### 11.1. Belästigung im Schlaf durch Autobahnlärm und Autobahnlärmbelastung

Die Belästigung im Schlaf durch den nächtlichen Lärm von der Autobahn gestaltet sich sehr ähnlich dem Bezug der Belästigungsreaktion zum nächtlichen Straßenverkehrslärm, fällt aber insgesamt (auch in der Belastungsgruppe der Starkbelasteten) geringer aus:

**Abbildung 217: Autobahnlärmbelastung und und nächtliche Autobahnlärmbelastung  $L_n$  in 10dB-Schritten im Mittelwertvergleich**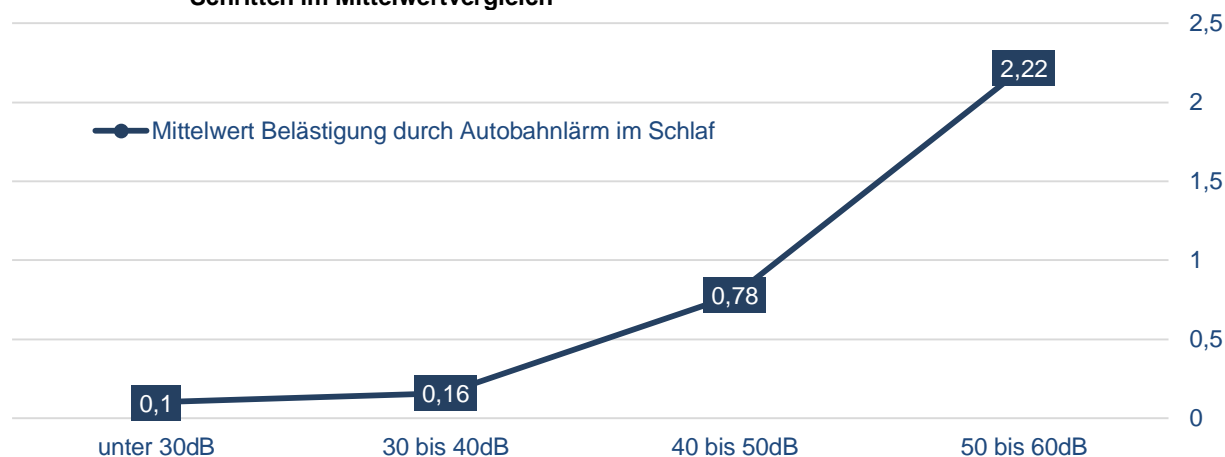

Anm.: Die Darstellung zeigt nachvollziehbare Zusammenhänge auf, enthält jedoch keine Prüfungen auf Kovariablen und andere Prädiktoren und ist somit nicht den Dosis-Wirkungskurven aus der gängigen Fachliteratur gleichzusetzen.

Das Belästigungsausmaß im niederen Belastungsbereich ist sehr gering ausgeprägt, beginnt aber im Vergleich zum 24h-Zeitraum bei rund 10dB niedrigeren Dauerlärmpegeln, ab Belastungen von etwa 40dB L<sub>n</sub>, auf niedrigem Niveau anzusteigen.

### 11.2. Belästigung im Schlaf durch Autobahnlärm und Katastralgemeinden

Die im Mittel stärkste Belästigung im Schlaf durch Autobahnlärm zeigt sich in Wilten und Vill. Die geringste Störung durch Autobahnlärm in der Nacht im eigenen Wohnumfeld empfinden die Befragten in Igls, Mühlau und Pradl, sowie in der Innenstadt (Katastralgemeinde Innsbruck):

**Abbildung 218: Belästigung im Schlaf durch Autobahnlärm und Katastralgemeinden im Mittelwertvergleich**

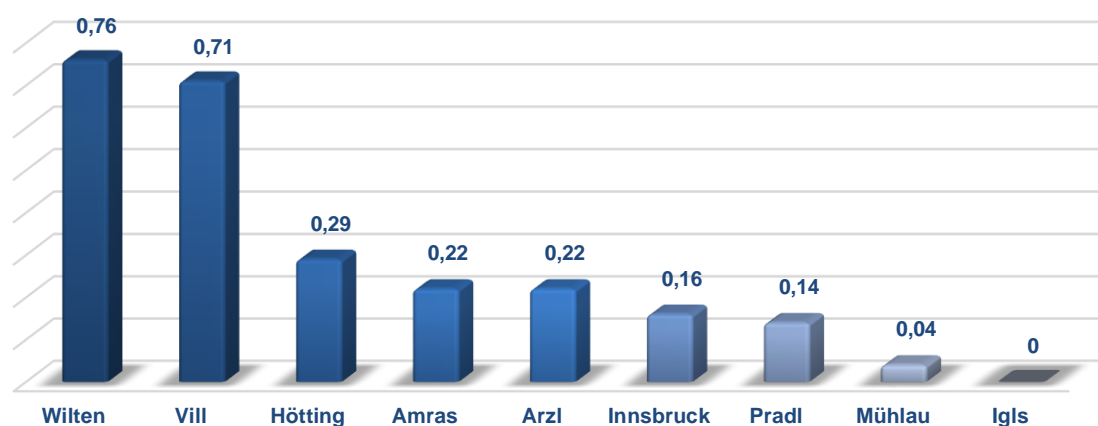

### 11.3. Belästigung im Schlaf durch Autobahnlärm und einzelne Parameter

Die Auswertungen zur Belästigung im Schlaf durch Autobahnlärm zeigen im Vergleich zu den anderen Belästigungslärmquellen geringere Bezüge zu anderen Parametern. Die Fallzahlen der Mittel- und Starkbelasteten sind sehr klein, weshalb die Aussagekraft der Extremgruppenvergleiche stark eingeschränkt ist. Besonders in der Extremgruppe der Starkbelasteten (*highly annoyed*, N=10) sind zu wenige Fälle für solide Auswertungen enthalten, weshalb diese Gruppe in der untenstehenden Tabelle ganz ausgespart wurde.

Im Folgenden einige ausgewählte Parameter, jeweils in die beiden Gruppen der gering und der mittelgradig Belasteten zusammengefasst, in Zusammenschau mit der Belästigung im Schlaf durch Autobahnlärm:

**Tabelle 164: Belästigung im Schlaf durch Autobahnlärm und ausgewählte Parameter**

|                   |          | Belästigung im Schlaf Autobahnlärm gruppiert |            |                        |            |
|-------------------|----------|----------------------------------------------|------------|------------------------|------------|
|                   |          | Gering belästigt                             |            | Mittelgradig belästigt |            |
|                   |          | Anzahl                                       | Zeilen (%) | Anzahl                 | Zeilen (%) |
| <b>Geschlecht</b> | weiblich | 522                                          | 96,5%      | 12                     | 2,2%       |
|                   | männlich | 467                                          | 95,3%      | 20                     | 4,1%       |

|                                                |                           |     |        |    |      |
|------------------------------------------------|---------------------------|-----|--------|----|------|
| <b>Altersgruppen</b>                           | 18 bis 40 Jahre           | 423 | 96,1%  | 14 | 3,2% |
|                                                | 41 bis 60 Jahre           | 302 | 95,6%  | 9  | 2,8% |
|                                                | über 60 Jahre             | 264 | 96,0%  | 9  | 3,3% |
| <b>Bildungsschicht</b>                         | Primärer Schulabschluss   | 94  | 95,9%  | 3  | 3,1% |
|                                                | Sekundärer Schulabschluss | 521 | 96,1%  | 17 | 3,1% |
|                                                | Tertiärer Schulabschluss  | 371 | 95,6%  | 12 | 3,1% |
| <b>Haushalt mit/ohne minderjährige Kinder</b>  | Haushalt ohne Kinder      | 731 | 95,9%  | 25 | 3,3% |
|                                                | Haushalt mit Kindern      | 258 | 95,9%  | 7  | 2,6% |
| <b>Baulicher Schutz vor Verkehrslärm</b>       | Keiner bis geringfügig    | 732 | 95,6%  | 25 | 3,3% |
|                                                | Gut bis komplett          | 230 | 97,5%  | 6  | 2,5% |
| <b>Innenhof bzw. lärm-abgewandte Seite</b>     | Ja                        | 680 | 97,0%  | 17 | 2,4% |
|                                                | Nein                      | 289 | 93,8%  | 15 | 4,9% |
| <b>Nachtschlaf</b>                             | Fenster geöffnet/gekippt  | 788 | 96,0%  | 27 | 3,3% |
|                                                | Fenster geschlossen       | 193 | 95,5%  | 5  | 2,5% |
| <b>Wohnbedingungen</b>                         | Nicht gut                 | 80  | 95,2%  | 1  | 1,2% |
|                                                | Durchschnittlich          | 528 | 95,1%  | 22 | 4,0% |
|                                                | Sehr gut                  | 379 | 97,2%  | 9  | 2,3% |
| <b>Bedingungen für Kinder</b>                  | Nicht gut                 | 45  | 95,7%  | 1  | 2,1% |
|                                                | Durchschnittlich          | 492 | 95,5%  | 19 | 3,7% |
|                                                | Sehr gut                  | 431 | 96,4%  | 11 | 2,5% |
| <b>Verbundenheit zu Innsbruck</b>              | Nicht verbunden           | 53  | 96,4%  | 1  | 1,8% |
|                                                | Durchschnittlich          | 360 | 95,0%  | 14 | 3,7% |
|                                                | Sehr verbunden            | 574 | 96,5%  | 17 | 2,9% |
| <b>Zufriedenheit eigene Wohnsituation</b>      | Nicht zufrieden           | 26  | 92,9%  | 0  | 0,0% |
|                                                | Durchschnittlich          | 243 | 94,2%  | 11 | 4,3% |
|                                                | Sehr zufrieden            | 719 | 96,6%  | 21 | 2,8% |
| <b>Lebensbedingungen (Summenscore)</b>         | Nicht gut (*)             | 4   | 80,0%  | 0  | 0,0% |
|                                                | Durchschnittlich          | 636 | 94,9%  | 28 | 4,2% |
|                                                | Sehr gut                  | 349 | 98,0%  | 4  | 1,1% |
| <b>Lebensqualität</b>                          | Nicht gut (*)             | 10  | 100,0% | 0  | 0,0% |
|                                                | Durchschnittlich          | 275 | 94,8%  | 11 | 3,8% |
|                                                | Sehr gut                  | 699 | 96,4%  | 20 | 2,8% |
| <b>Lärmempfindlichkeit</b>                     | Nicht lärmempfindlich     | 268 | 97,5%  | 5  | 1,8% |
|                                                | Durchschnittlich          | 558 | 95,5%  | 20 | 3,4% |
|                                                | Sehr lärmempfindlich      | 163 | 94,8%  | 7  | 4,1% |
| <b>Summenscore</b>                             | Coping ausgeprägt         | 220 | 90,9%  | 13 | 5,4% |
| <b>Lärmcoping</b>                              | Coping nicht ausgeprägt   | 768 | 97,5%  | 19 | 2,4% |
| <b>Gefühlte Zunahme Lärmbelastung</b>          | Ja                        | 411 | 94,3%  | 16 | 3,7% |
|                                                | Nein                      | 578 | 97,1%  | 16 | 2,7% |
| <b>Gefühlte Abnahme Lärmbelastung</b>          | Ja                        | 58  | 100,0% | 0  | 0,0% |
|                                                | Nein                      | 931 | 95,7%  | 32 | 3,3% |
| <b>Notwendigkeit (weiterer) Maßnahmen Lärm</b> | Maßnahmen notwendig       | 654 | 94,6%  | 27 | 3,9% |
|                                                | Keine Maßnahmen nötig     | 189 | 98,4%  | 3  | 1,6% |

|                                                                       |                  |     |       |    |      |
|-----------------------------------------------------------------------|------------------|-----|-------|----|------|
| <b>Negative Gesundheitswirkungen Lärm</b>                             | Gering           | 212 | 97,7% | 4  | 1,8% |
|                                                                       | Stark            | 744 | 95,3% | 28 | 3,6% |
| <b>Lautheit Innsbruck im Vergleich zu anderen Städten Österreichs</b> | Ruhiger          | 285 | 97,6% | 5  | 1,7% |
|                                                                       | Gleich           | 530 | 96,2% | 17 | 3,1% |
|                                                                       | Lauter           | 161 | 92,5% | 9  | 5,2% |
| <b>Einschätzung eigener Lärmbeitrag</b>                               | Gering           | 749 | 96,6% | 18 | 2,3% |
|                                                                       | Durchschnittlich | 215 | 94,7% | 12 | 5,3% |
|                                                                       | Groß             | 25  | 86,2% | 2  | 6,9% |

(\*) zu kleine Fallzahlen für solide Auswertungen

Anm.: Die Fallzahlen in der Gruppe der mittelgradig Belästigten (N=32) sind in einigen der obenstehenden Subgruppen zu gering für solide Auswertungen.



# Lärmcoping

## 1. Überblick und Summenscore

Aus den Auswertungen der vorangegangenen Kapitel ist ersichtlich, dass die Wahrnehmung und Beurteilung von (Verkehrs-)Lärm und die daraus resultierenden Belästigungsreaktionen eng mit dem Ausmaß der vorhandenen Lärmbelastung einhergehen. Jedoch auch, dass die gemachten Erfahrungen jedes einzelnen und die daraus resultierenden Adaptations- und Bewältigungsmechanismen (Copingmöglichkeiten) entscheidend für die entwickelten Emotionen und daher die letztendliche persönliche Beurteilung des Ausmaßes des wichtigsten Umweltstressors (Verkehrs-)Lärm sind.

Für die Verursachung von (negativen) gesundheitlich wirksamen Effekten ist nicht allein das Ausmaß der Belastung durch den Stressor Lärm ausschlaggebend, sondern zu einem sehr erheblichen Anteil zunächst die Einschätzung der Belastung (primary appraisal) und schließlich der individuelle Umgang (secondary appraisal) mit demselben.

Lärmcopingmechanismen als Reaktionen zur Bewältigung von Lärmbelastungen wurden in Ansätzen mittels 7 Fragen erhoben (aktives und passives instrumentelles, emotionales und politisches Copingverhalten) und mittels Ja/Nein-Antwortmöglichkeiten abgefragt:

**Abbildung 219: Lärmcopingreaktionen im Vergleich in Prozent (nach Häufigkeit absteigend sortiert)**

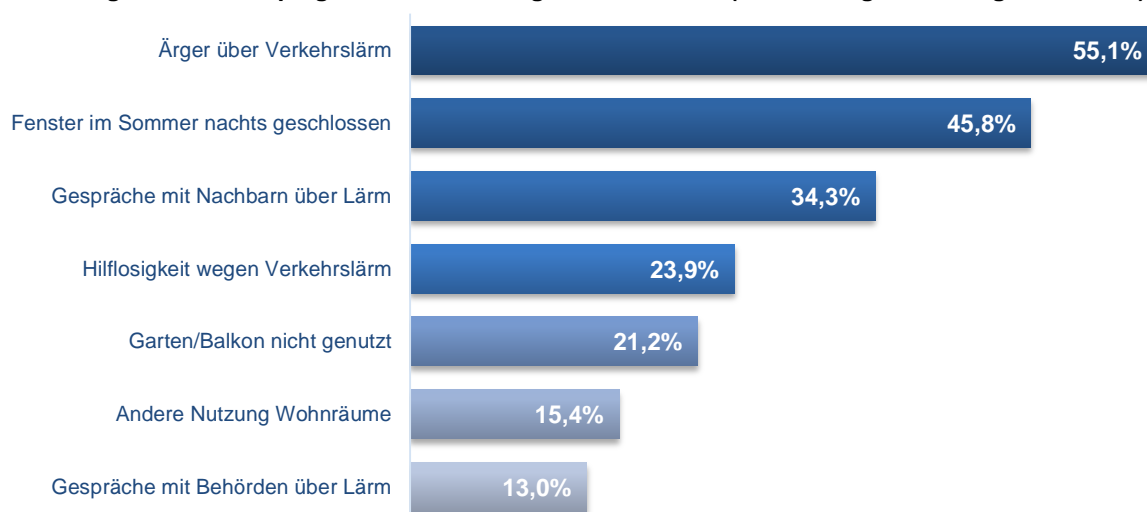

**Tabelle 165: Lärmcopingreaktionen im Mittelwertvergleich (absteigend sortiert)**

|                    | Ärger über Verkehrslärm | Fenster im Sommer nachts geschlossen | Gespräche mit Nachbarn über Lärm | Hilflosigkeit wegen Verkehrslärm | Garten/Balkon nicht genutzt | Andere Nutzung Wohnräume | Gespräche mit Behörden über Lärm |
|--------------------|-------------------------|--------------------------------------|----------------------------------|----------------------------------|-----------------------------|--------------------------|----------------------------------|
| Mittelwert         | 1,45                    | 1,54                                 | 1,66                             | 1,76                             | 1,79                        | 1,85                     | 1,87                             |
| N                  | 1031                    | 1031                                 | 1031                             | 1031                             | 1030                        | 1031                     | 1031                             |
| Standardabweichung | 0,498                   | 0,498                                | 0,475                            | 0,426                            | 0,409                       | 0,361                    | 0,336                            |

Über alle 7 Fragen hinweg (Summenscore) zeigen 23,5% der Befragten ein ausgeprägtes Lärmadaptationsverhalten, rund drei Viertel nicht. Eine Person macht keine Angaben:

**Abbildung 220: Summenscore Lärmcoping in Prozent**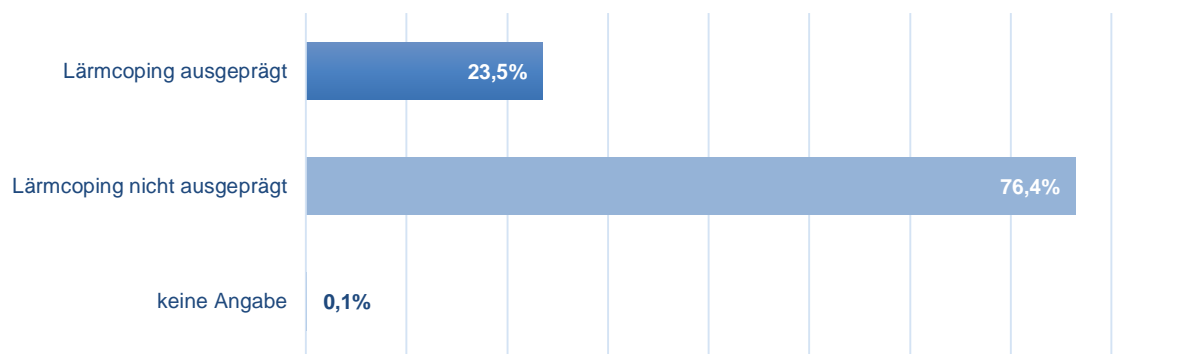

## 2. Instrumentelles Lärmcoping

Fast die Hälfte (45,8%) aller befragten Innsbruckerinnen und Innsbrucker hat schon zumindest einmal aufgrund der Lärmbelastung ihre Fenster auch im Sommer nachts geschlossen. Über 21% haben ihren Garten oder Balkon aus diesem Grund nicht genutzt und über 15% im untersuchten Kollektiv haben schon zumindest einmal ihre Wohnräume anders genutzt, um der Belästigung durch Lärm zu entgehen:

**Abbildung 221: Instrumentelles Lärmcoping in Prozent**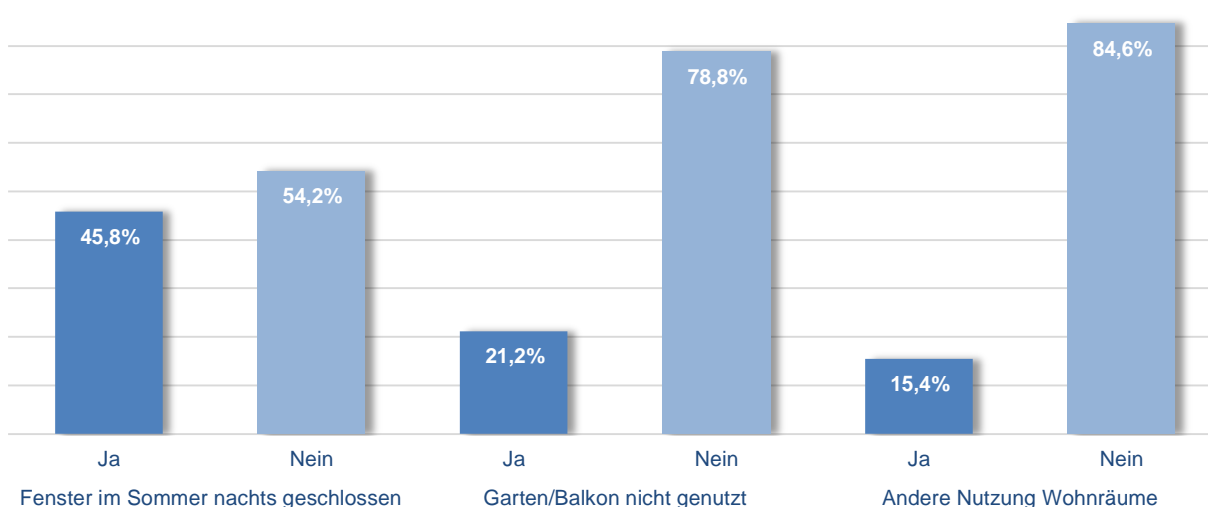

### 2.1. Instrumentelles Lärmcoping und ausgewählte Parameter

Eine Reihe von Faktoren zeigt Zusammenhänge zum instrumentellen Lärmcoping. Unter anderem die vorhandene Lärmbelastung, die Lärmempfindlichkeit und das Gefühl der Ausgesetzttheit gegenüber Verkehrslärm, sowie das Belästigungsempfinden.

Sehr deutlich treten die Unterschiede im Verhalten der befragten Innsbruckerinnen und Innsbrucker auch in Abhängigkeit von baulichem Lärmschutz in deren Wohnumfeld zutage:

**Abbildung 222: Instrumentelles Lärmcoping und baulicher Schutz vor Verkehrslärm (gruppiert)**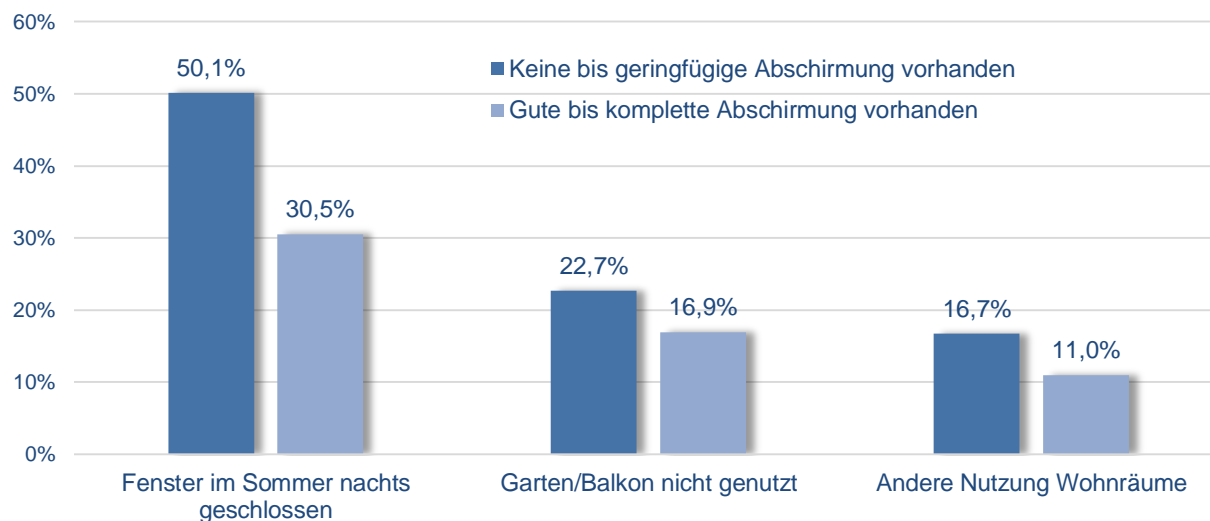

### 3. Emotionales Lärmcoping

Eine Mehrheit der Befragten (55,1%) hat sich schon zumindest einmal über den Verkehrslärm geärgert, knapp ein Viertel sich hilflos gefühlt und über ein Drittel mit Nachbarn über die Lärmbelastungen gesprochen:

**Abbildung 223: Emotionales Lärmcoping in Prozent**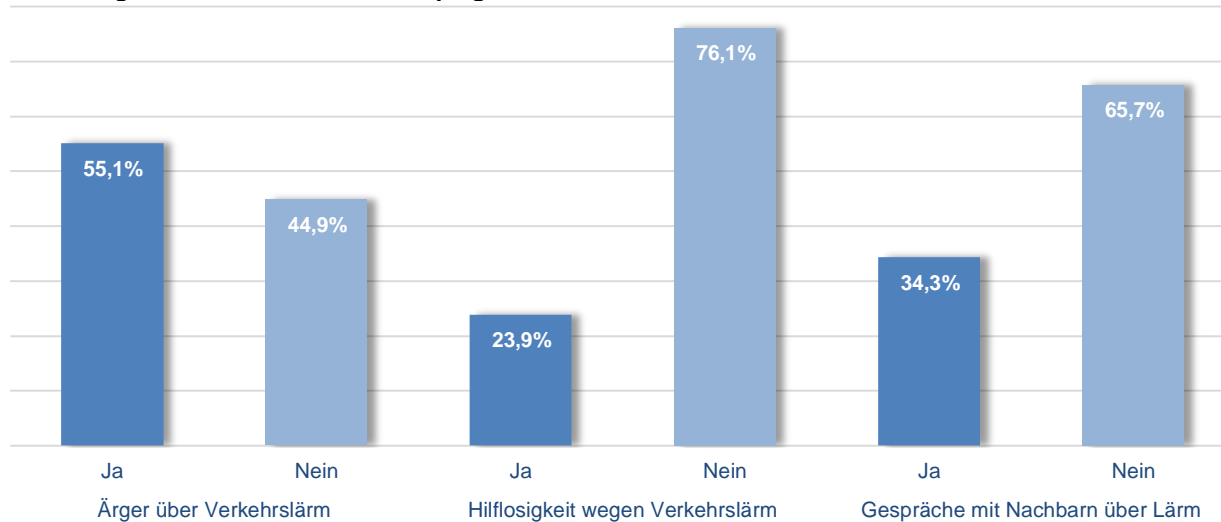

#### 3.1. Emotionales Lärmcoping und Lärmbelastung

In der Zusammenschau mit den gegebenen Verkehrslärmpegeln werden sehr deutliche Unterschiede zwischen den einzelnen Belastungsgruppen sichtbar: Knapp ein Drittel der vom 24h-Straßenlärm stark Belasteten hat sich schon zumindest einmal hilflos wegen dem Verkehrslärm gefühlt. In der Gruppe der vom Straßenlärm gering belasteten Befragten sind es etwas weniger als 9%.

Beim Flug- und Schienenverkehrslärm fällt auf, dass die Gruppe der gering Belasteten deutlich stärker reagiert, als auf die Lärmbelastung durch den Straßenverkehr und beim Fluglärm die mittelgradig belasteten Befragten sogar häufiger emotionales Coping zeigen, als die Starkbelasteten. Die Unterschiede zwischen den einzelnen Belastungsgruppen fallen beim Flug- und Schienenverkehrslärm insgesamt geringer aus:

**Tabelle 166: Emotionales Lärmcoping und Lärmbelastung nach Quelle (gruppiert)**

|                         |                               | Ärger über Verkehrslärm empfunden |            | Hilflosigkeit wegen Verkehrslärm gefühlt |            | Gespräche mit Nachbarn über Lärm geführt |            |
|-------------------------|-------------------------------|-----------------------------------|------------|------------------------------------------|------------|------------------------------------------|------------|
|                         |                               | Anzahl                            | Zeilen (%) | Anzahl                                   | Zeilen (%) | Anzahl                                   | Zeilen (%) |
| <b>Straßenlärm 24h</b>  | Stark belastet >55dB          | 338                               | 65,5%      | 170                                      | 32,9%      | 201                                      | 39,0%      |
|                         | Mittelgradig belastet 45-55dB | 200                               | 49,6%      | 66                                       | 16,4%      | 137                                      | 34,0%      |
|                         | Gering belastet <45dB         | 30                                | 26,8%      | 10                                       | 8,9%       | 16                                       | 14,3%      |
| <b>Fluglärm 24h</b>     | Stark belastet >55dB          | 59                                | 52,7%      | 25                                       | 22,3%      | 40                                       | 35,7%      |
|                         | Mittelgradig belastet 45-55dB | 233                               | 64,7%      | 102                                      | 28,3%      | 139                                      | 38,6%      |
|                         | Gering belastet <45dB         | 276                               | 49,4%      | 119                                      | 21,3%      | 175                                      | 31,3%      |
| <b>Schienenlärm 24h</b> | Stark belastet >55dB          | 78                                | 67,2%      | 41                                       | 35,3%      | 45                                       | 38,8%      |
|                         | Mittelgradig belastet 45-55dB | 181                               | 56,6%      | 79                                       | 24,7%      | 120                                      | 37,5%      |
|                         | Gering belastet <45dB         | 309                               | 51,9%      | 126                                      | 21,2%      | 189                                      | 31,8%      |

In der Detailbetrachtung wird ersichtlich, dass beim Flug- und Schienenverkehrslärm bereits ab Lärmpegeln über 40dB die Häufigkeit des Ärgers über die Lärmbelastung deutlich höher liegt als beim Straßenverkehrslärm. Bei starken Dauerlärmbelastungen mit Beurteilungspegeln über 50dB sind die Unterschiede zwischen den Verkehrslärmquellen hingegen sehr gering ausgeprägt:

**Abbildung 224: Ärger über Verkehrslärm und 24h-Lärmbelastung  $L_{den}$  nach Quelle in 10dB-Schritten im Mittelwertvergleich**

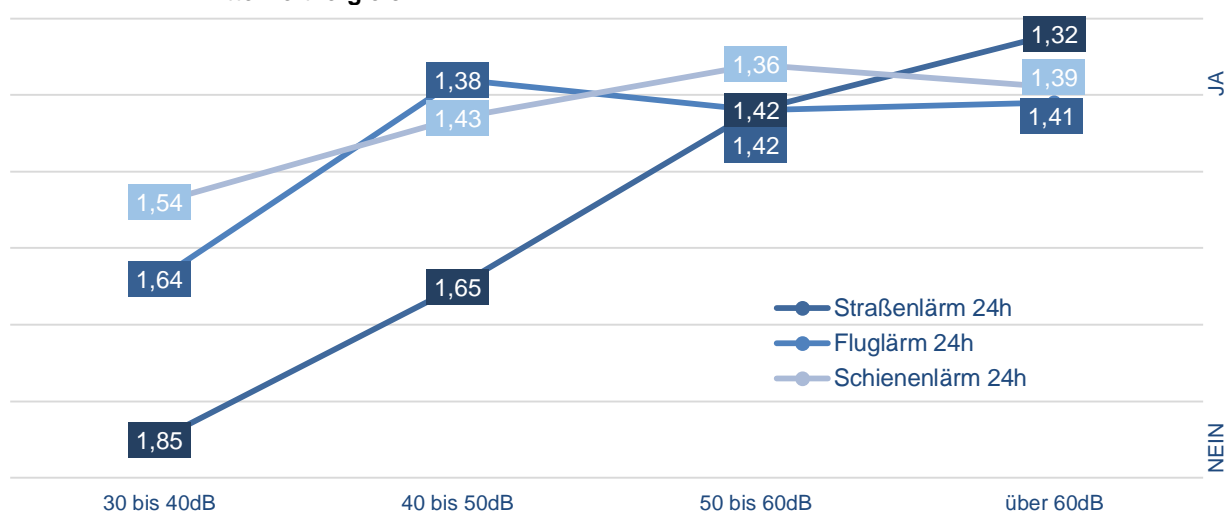

### 3.2. Emotionales Lärmcoping und ausgewählte Parameter

Die jüngste Altersgruppe ärgert sich häufiger über den Verkehrslärm als die beiden anderen Altersgruppen, fühlt sich jedoch seltener hilflos und führt auch seltener Gespräche mit den Nachbarn darüber.

Frauen copen etwas häufiger emotional gegen den Verkehrslärm an als Männer.

Eine sehr ausgeprägte Beziehung besteht zu den Faktoren Beurteilung der eigenen Wohnsituation, Einschätzung der eigenen Lebensqualität und Lärmempfindlichkeit, sowie besonders stark zur empfundenen Lärmexposition und –Belästigung.

**Abbildung 225: Emotionales Lärmcoping und Lärmempfindlichkeit (gruppiert)**

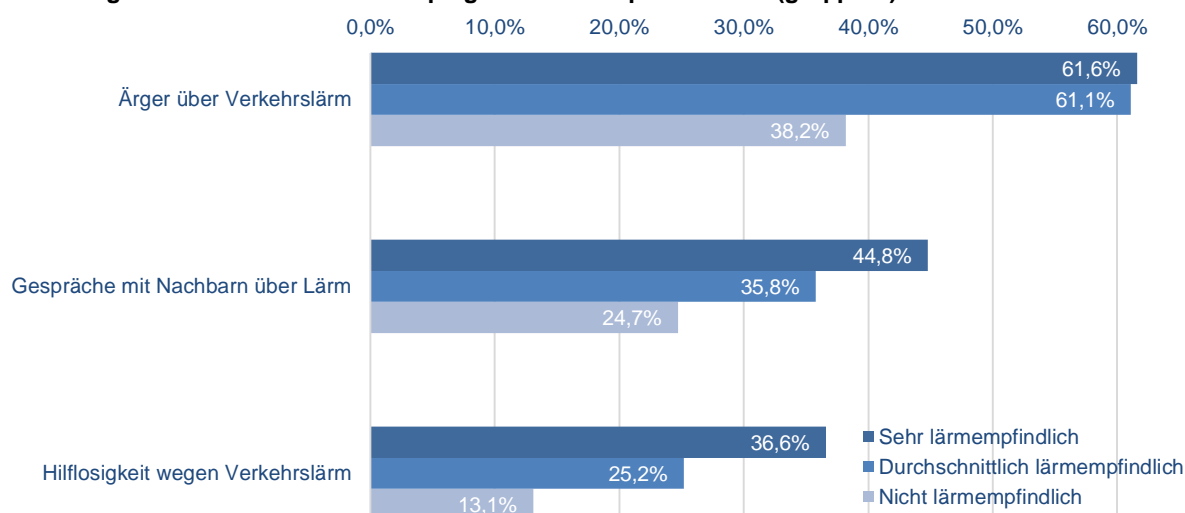

Den Spitzenwert zeigt die Gruppe der sich stark vom Lärm insgesamt belästigt fühlenden Befragten, welche sich zu knapp 93% schon zumindest einmal über den Verkehrslärm geärgert, zu über 60% schon zumindest einmal hilflos gefühlt und zu über 65% Gespräche mit Nachbarn über die Lärmbelastungen geführt haben:

**Tabelle 167: Emotionales Lärmcoping und ausgewählte Parameter (gruppiert)**

|                            |                       | Ärger über Verkehrslärm empfunden |            | Hilflosigkeit wegen Verkehrslärm gefühlt |            | Gespräche mit Nachbarn über Lärm geführt |            |
|----------------------------|-----------------------|-----------------------------------|------------|------------------------------------------|------------|------------------------------------------|------------|
|                            |                       | Anzahl                            | Zeilen (%) | Anzahl                                   | Zeilen (%) | Anzahl                                   | Zeilen (%) |
| <b>Geschlecht</b>          | weiblich              | 307                               | 56,7%      | 145                                      | 26,8%      | 206                                      | 38,1%      |
|                            | männlich              | 261                               | 53,3%      | 101                                      | 20,6%      | 148                                      | 30,2%      |
| <b>Altersgruppen</b>       | 18 bis 40 Jahre       | 265                               | 60,2%      | 94                                       | 21,4%      | 122                                      | 27,7%      |
|                            | 41 bis 60 Jahre       | 173                               | 54,7%      | 82                                       | 25,9%      | 131                                      | 41,5%      |
|                            | über 60 Jahre         | 130                               | 47,3%      | 70                                       | 25,5%      | 101                                      | 36,7%      |
| <b>Wohnsituation</b>       | Nicht zufrieden       | 23                                | 82,1%      | 16                                       | 57,1%      | 17                                       | 60,7%      |
|                            | Durchschnittlich      | 189                               | 73,3%      | 94                                       | 36,4%      | 117                                      | 45,3%      |
|                            | Sehr zufrieden        | 355                               | 47,7%      | 136                                      | 18,3%      | 219                                      | 29,4%      |
| <b>Lärmempfindlichkeit</b> | Nicht lärmempfindlich | 105                               | 38,2%      | 36                                       | 13,1%      | 68                                       | 24,7%      |
|                            | Durchschnittlich      | 357                               | 61,1%      | 147                                      | 25,2%      | 209                                      | 35,8%      |

|                       |                        |     |       |     |       |     |       |
|-----------------------|------------------------|-----|-------|-----|-------|-----|-------|
|                       | Sehr lärmempfindlich   | 106 | 61,6% | 63  | 36,6% | 77  | 44,8% |
|                       | Nicht gut              | 8   | 80,0% | 6   | 60,0% | 5   | 50,0% |
| <b>Lebensqualität</b> | Durchschnittlich       | 188 | 64,8% | 94  | 32,4% | 128 | 44,1% |
|                       | Sehr gut               | 369 | 50,9% | 146 | 20,1% | 220 | 30,3% |
| <b>Ausgesetztheit</b> | Gering exponiert       | 68  | 26,1% | 13  | 5,0%  | 45  | 17,2% |
|                       | Mittelgradig exponiert | 382 | 60,6% | 152 | 24,1% | 223 | 35,4% |
| <b>Lärm gesamt</b>    | Stark exponiert        | 118 | 84,3% | 81  | 57,9% | 86  | 61,4% |
|                       | Gering belästigt       | 98  | 25,9% | 24  | 6,3%  | 53  | 14,0% |
| <b>Belästigung</b>    | Mittelgradig belästigt | 354 | 67,0% | 146 | 27,7% | 219 | 41,5% |
| <b>Lärm gesamt</b>    | Stark belästigt        | 116 | 92,8% | 76  | 60,8% | 82  | 65,6% |

## 4. Politisches Lärmcoping

13% aller befragten Probandinnen und Probanden haben schon zumindest einmal mit Vertreterinnen und Vertretern der Stadt oder anderen Behörden über die Lärmbelastungen gesprochen:

**Abbildung 226: Politisches Lärmcoping in Prozent**

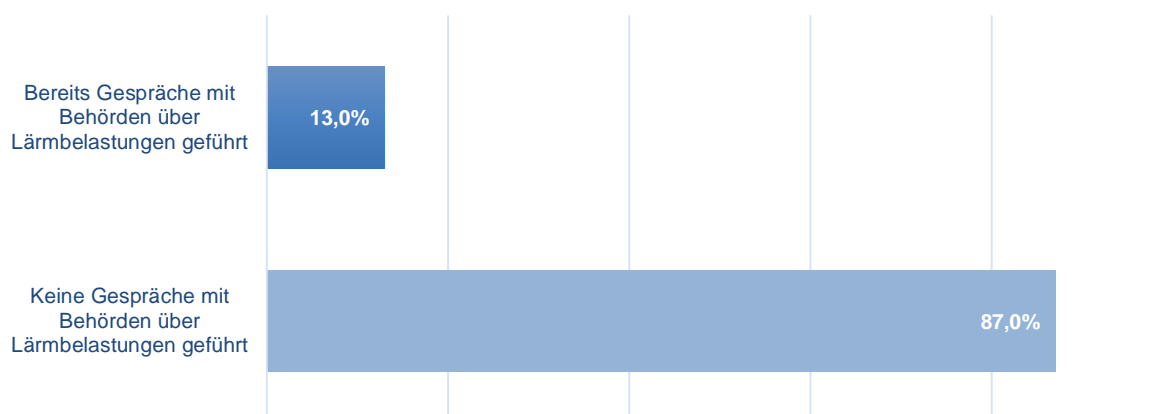

### 4.1. Politisches Lärmcoping und ausgewählte Parameter

Der Einfluss des Ausmaßes der gegebenen Lärmbelastungen auf das Eintreten von politischem Lärmcoping ist deutlich weniger einheitlich als die persönliche Disposition und Einschätzung der Lärmbelastungen. So zeigen vor allem sich stärker dem Lärm ausgesetzt empfindende und stärker lärmbelästigte Befragte ein aktives politisches Copingverhalten. Dieses ist in etwa doppelt so ausgeprägt wie im Durchschnitt aller Befragten und um ein Vielfaches höher als bei gering exponierten / belästigten Befragten.

Auch die Einschätzung der eigenen Wohn- und Lebensbedingungen, der Wohnsituation an sich, der eigenen Lärmempfindlichkeit und der Güte der eigenen Lebensqualität zeigen sehr ausgeprägte Bezüge zur Bereitschaft mit Behördenvertreterinnen und –Vertretern über den Lärm zu sprechen.

Zwischen den Geschlechtern besteht (bereinigt) kein Unterschied in der Häufigkeit der Befragten, welche bereits Gespräche mit Behörden über die Lärmbelastungen geführt haben.

Jüngere haben etwas weniger häufig als ältere Befragte schon zumindest einmal mit Behörden über den Lärm gesprochen:

**Tabelle 168: Politisches Lärmcoping und ausgewählte Parameter (gruppiert)**

|                                       |                        | Gespräche mit Behörden über Lärm |            |        |            |
|---------------------------------------|------------------------|----------------------------------|------------|--------|------------|
|                                       |                        | Ja                               |            | Nein   |            |
|                                       |                        | Anzahl                           | Zeilen (%) | Anzahl | Zeilen (%) |
| <b>Geschlecht</b>                     | weiblich               | 72                               | 13,3%      | 469    | 86,7%      |
|                                       | männlich               | 62                               | 12,7%      | 428    | 87,3%      |
| <b>Altersgruppen</b>                  | 18 bis 40 Jahre        | 39                               | 8,9%       | 401    | 91,1%      |
|                                       | 41 bis 60 Jahre        | 49                               | 15,5%      | 267    | 84,5%      |
|                                       | über 60 Jahre          | 46                               | 16,7%      | 229    | 83,3%      |
| <b>Wohnsituation</b>                  | Nicht zufrieden        | 9                                | 32,1%      | 19     | 67,9%      |
|                                       | Durchschnittlich       | 54                               | 20,9%      | 204    | 79,1%      |
|                                       | Sehr zufrieden         | 71                               | 9,5%       | 673    | 90,5%      |
| <b>Lärmempfindlichkeit</b>            | Nicht lärmempfindlich  | 20                               | 7,3%       | 255    | 92,7%      |
|                                       | Durchschnittlich       | 80                               | 13,7%      | 504    | 86,3%      |
|                                       | Sehr lärmempfindlich   | 34                               | 19,8%      | 138    | 80,2%      |
| <b>Lebensqualität</b>                 | Nicht gut              | 6                                | 60,0%      | 4      | 40,0%      |
|                                       | Durchschnittlich       | 57                               | 19,7%      | 233    | 80,3%      |
|                                       | Sehr gut               | 71                               | 9,8%       | 654    | 90,2%      |
| <b>Ausgesetztheit<br/>Lärm gesamt</b> | Gering exponiert       | 9                                | 3,4%       | 252    | 96,6%      |
|                                       | Mittelgradig exponiert | 85                               | 13,5%      | 545    | 86,5%      |
|                                       | Stark exponiert        | 40                               | 28,6%      | 100    | 71,4%      |
| <b>Belästigung<br/>Lärm gesamt</b>    | Gering belästigt       | 17                               | 4,5%       | 361    | 95,5%      |
|                                       | Mittelgradig belästigt | 73                               | 13,8%      | 455    | 86,2%      |
|                                       | Stark belästigt        | 44                               | 35,2%      | 81     | 64,8%      |

## 5. Summenscore Lärmcoping und ausgewählte Parameter

Insgesamt kann zu den einzelnen Lärmcopingfragen zusammenfassend ausgesagt werden:

- Rund ein Viertel der Befragten zeigt Lärmbewältigungsmechanismen, zwei Drittel hingegen nicht.
- Das Belästigungsempfinden durch Verkehrslärm zeigt die stärksten Bezüge zum Lärmcopingverhalten der befragten Innsbruckerinnen und Innsbrucker.
- Ebenso besteht ein starker Zusammenhang zwischen dem Ausmaß der empfundenen eigenen Lärmexposition, der Einschätzung der eigenen Lärmempfindlichkeit, der Beurteilung der Wohn- und Lebensbedingungen in Innsbruck und in der eigenen Wohnung zur Häufigkeit der angewandten Verhaltensweisen gegenüber dem (Verkehrs-)Lärm.
- Höhere gegebene Verkehrslärmbelastungen führen zu deutlich steigendem Lärmcopingverhalten:

**Abbildung 227: Summenschore Lärmcoping und 24h-Lärmbelastung  $L_{den}$  nach Quelle in 10dB-Schritten im Mittelwertvergleich**

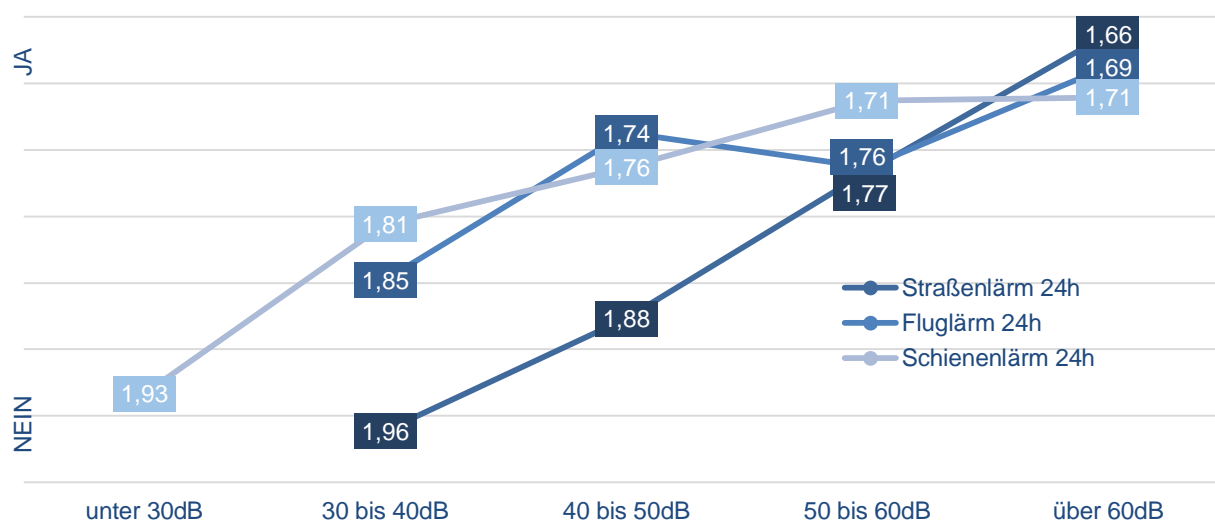

Anm.: Die Belastungsklasse unter 30dB  $L_{den}$  umfasst für den Straßenverkehrslärm nur 2 Befragte und ist für den Flugverkehrslärm nicht vorhanden.

- Weibliche Befragte reagieren geringfügig häufiger auf Lärm als Männer.
- Die jüngsten Befragten zeigen das geringste Lärmbewältigungsverhalten, die mittlere Altersklasse der 41- bis 60-Jährigen das am deutlichsten ausgeprägte.
- Je höher der erreichte höchste Schulabschluss, desto häufiger geben Befragte an, Lärmbewältigungsmechanismen einzusetzen.
- Befragte, welche durch bauliche Abschirmungen (Gebäude, Mauern, Innenhöfe ...) vor Verkehrslärm (zum Teil) geschützt wohnen, haben weniger Lärmcopingbedarf.
- Befragte, welche der Meinung sind, in Innsbruck sei es lauter oder gleich laut wie in anderen vergleichbaren Städten Österreichs, zeigen ein stärkeres Lärmadaptationsverhalten, als Befragte, die glauben, dass es in Innsbruck ruhiger als in anderen Städten sei.

**Tabelle 169: Summenschore Lärmcoping und ausgewählte Parameter (gruppiert)**

|                                          |                           | Summenschore Lärmcoping |            |                             |            |
|------------------------------------------|---------------------------|-------------------------|------------|-----------------------------|------------|
|                                          |                           | Lärmcoping ausgeprägt   |            | Lärmcoping nicht ausgeprägt |            |
|                                          |                           | Anzahl                  | Zeilen (%) | Anzahl                      | Zeilen (%) |
| <b>Geschlecht</b>                        | weiblich                  | 139                     | 25,7%      | 401                         | 74,3%      |
|                                          | männlich                  | 103                     | 21,0%      | 387                         | 79,0%      |
| <b>Altersgruppen</b>                     | 18 bis 40 Jahre           | 90                      | 20,5%      | 350                         | 79,5%      |
|                                          | 41 bis 60 Jahre           | 88                      | 27,9%      | 227                         | 72,1%      |
|                                          | über 60 Jahre             | 64                      | 23,3%      | 211                         | 76,7%      |
| <b>Bildungsschicht</b>                   | Primärer Schulabschluss   | 16                      | 16,3%      | 82                          | 83,7%      |
|                                          | Sekundärer Schulabschluss | 114                     | 21,0%      | 428                         | 79,0%      |
|                                          | Tertiärer Schulabschluss  | 111                     | 28,7%      | 276                         | 71,3%      |
| <b>Baulicher Schutz vor Verkehrslärm</b> | Nicht bis kaum vorhanden  | 199                     | 26,0%      | 566                         | 74,0%      |
|                                          | Vorhanden                 | 38                      | 16,1%      | 198                         | 83,9%      |



|                                                                       |                               |     |       |     |       |
|-----------------------------------------------------------------------|-------------------------------|-----|-------|-----|-------|
| <b>Straßenlärm 24h</b>                                                | Stark belastet >55dB          | 158 | 30,7% | 357 | 69,3% |
|                                                                       | Mittelgradig belastet 45-55dB | 75  | 18,6% | 328 | 81,4% |
|                                                                       | Gering belastet <45dB         | 9   | 8,0%  | 103 | 92,0% |
| <b>Schienenlärm 24h</b>                                               | Stark belastet >55dB          | 36  | 31,0% | 80  | 69,0% |
|                                                                       | Mittelgradig belastet 45-55dB | 81  | 25,3% | 239 | 74,7% |
|                                                                       | Gering belastet <45dB         | 125 | 21,0% | 469 | 79,0% |
| <b>Fluglärm 24h</b>                                                   | Stark belastet >55dB          | 27  | 24,1% | 85  | 75,9% |
|                                                                       | Mittelgradig belastet 45-55dB | 100 | 27,9% | 259 | 72,1% |
|                                                                       | Gering belastet <45dB         | 115 | 20,6% | 444 | 79,4% |
| <b>Lautheit Innsbruck im Vergleich zu anderen Städten Österreichs</b> | Ruhiger                       | 56  | 19,2% | 236 | 80,8% |
|                                                                       | Gleich                        | 120 | 21,8% | 431 | 78,2% |
|                                                                       | Lauter                        | 66  | 38,2% | 107 | 61,8% |
| <b>Lärmempfindlichkeit</b>                                            | Nicht lärmempfindlich         | 34  | 12,4% | 241 | 87,6% |
|                                                                       | Durchschnittlich              | 145 | 24,9% | 438 | 75,1% |
|                                                                       | Sehr lärmempfindlich          | 63  | 36,6% | 109 | 63,4% |
| <b>Ausgesetztheit Lärm gesamt</b>                                     | Gering exponiert              | 15  | 5,7%  | 246 | 94,3% |
|                                                                       | Mittelgradig exponiert        | 151 | 24,0% | 479 | 76,0% |
|                                                                       | Stark exponiert               | 76  | 54,7% | 63  | 45,3% |

## 6. Summenscore Lärmcoping und Lärmbelästigung

Noch stärker als in Zusammenschau mit der gegebenen Lärmbelastung steigt die Häufigkeit der eingesetzten Lärmadaptationsmechanismen mit zunehmender empfundener Lärmbelästigung:

**Abbildung 228: Summenscore Lärmcoping und Belästigung durch Lärm gesamt im Mittelwertvergleich**

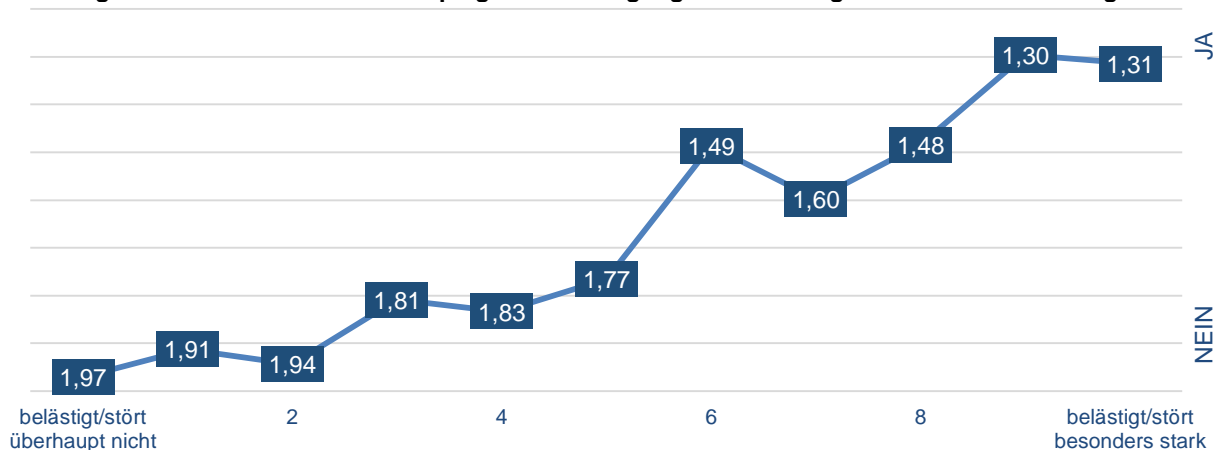

Die einzelnen Quellen der Verkehrslärmbelästigung (Straßen-, Flug- oder Schienenverkehrslärm) zeigen im Summenscore keine ausgeprägten Abweichungen voneinander.

Ähnliches gilt für die nicht verkehrsverursachte Lärmbelästigung. Im Vergleich der Extremgruppen fällt bei der Belästigung durch Erschütterungen, Nachbarschaftslärm und Lärm aus Gewerbe und Industrie ein stärker ausgeprägtes Lärmcopingverhalten als bei den anderen Belästigungsquellen auf:

Tabelle 170: Summenscore Lärmcoping und Lärmbelastigung (gruppiert)

|                                                               |                        | Summenscore Lärmcoping |            |                             |            |
|---------------------------------------------------------------|------------------------|------------------------|------------|-----------------------------|------------|
|                                                               |                        | Lärmcoping ausgeprägt  |            | Lärmcoping nicht ausgeprägt |            |
|                                                               |                        | Anzahl                 | Zeilen (%) | Anzahl                      | Zeilen (%) |
| <b>Belästigung im Schlaf<br/>Lärm gesamt</b>                  | Gering belästigt       | 75                     | 10,8%      | 620                         | 89,2%      |
|                                                               | Mittelgradig belästigt | 112                    | 43,8%      | 144                         | 56,3%      |
|                                                               | Stark belästigt        | 55                     | 69,6%      | 24                          | 30,4%      |
| <b>Belästigung<br/>Lärm gesamt</b>                            | Gering belästigt       | 20                     | 5,3%       | 358                         | 94,7%      |
|                                                               | Mittelgradig belästigt | 147                    | 27,8%      | 381                         | 72,2%      |
|                                                               | Stark belästigt        | 75                     | 60,5%      | 49                          | 39,5%      |
| <b>Belästigung<br/>Fluglärm</b>                               | Gering belästigt       | 82                     | 16,1%      | 428                         | 83,9%      |
|                                                               | Mittelgradig belästigt | 98                     | 24,6%      | 301                         | 75,4%      |
|                                                               | Stark belästigt        | 62                     | 51,2%      | 59                          | 48,8%      |
| <b>Belästigung<br/>Straßenverkehrslärm</b>                    | Gering belästigt       | 73                     | 13,5%      | 466                         | 86,5%      |
|                                                               | Mittelgradig belästigt | 101                    | 26,9%      | 274                         | 73,1%      |
|                                                               | Stark belästigt        | 68                     | 58,6%      | 48                          | 41,4%      |
| <b>Belästigung<br/>Schienenverkehrslärm</b>                   | Gering belästigt       | 166                    | 19,8%      | 673                         | 80,2%      |
|                                                               | Mittelgradig belästigt | 60                     | 37,3%      | 101                         | 62,7%      |
|                                                               | Stark belästigt        | 16                     | 53,3%      | 14                          | 46,7%      |
| <b>Belästigung<br/>Baustellenlärm</b>                         | Gering belästigt       | 112                    | 16,7%      | 558                         | 83,3%      |
|                                                               | Mittelgradig belästigt | 87                     | 33,0%      | 177                         | 67,0%      |
|                                                               | Stark belästigt        | 43                     | 45,3%      | 52                          | 54,7%      |
|                                                               | w.n. / k.A.            | 0                      | 0,0%       | 1                           | 100,0%     |
| <b>Belästigung<br/>Nachbarschaftslärm</b>                     | Gering belästigt       | 125                    | 17,0%      | 611                         | 83,0%      |
|                                                               | Mittelgradig belästigt | 83                     | 34,2%      | 160                         | 65,8%      |
|                                                               | Stark belästigt        | 34                     | 66,7%      | 17                          | 33,3%      |
| <b>Belästigung Lärm<br/>von Passanten und<br/>Gaststätten</b> | Gering belästigt       | 121                    | 16,2%      | 627                         | 83,8%      |
|                                                               | Mittelgradig belästigt | 92                     | 39,7%      | 140                         | 60,3%      |
|                                                               | Stark belästigt        | 29                     | 58,0%      | 21                          | 42,0%      |
| <b>Belästigung<br/>Erschütterungen</b>                        | Gering belästigt       | 156                    | 18,1%      | 706                         | 81,9%      |
|                                                               | Mittelgradig belästigt | 64                     | 47,4%      | 71                          | 52,6%      |
|                                                               | Stark belästigt        | 22                     | 66,7%      | 11                          | 33,3%      |
| <b>Belästigung Lärm aus<br/>Gewerbe u. Industrie</b>          | Gering belästigt       | 189                    | 20,2%      | 747                         | 79,8%      |
|                                                               | Mittelgradig belästigt | 41                     | 51,9%      | 38                          | 48,1%      |
|                                                               | Stark belästigt        | 12                     | 80,0%      | 3                           | 20,0%      |
| <b>Belästigung<br/>Autobahnlärm</b>                           | Gering belästigt       | 209                    | 22,1%      | 737                         | 77,9%      |
|                                                               | Mittelgradig belästigt | 20                     | 32,3%      | 42                          | 67,7%      |
|                                                               | Stark belästigt        | 13                     | 59,1%      | 9                           | 40,9%      |

Fühlen sich Befragte durch Lärm in der Nacht im Schlaf gestört, fallen die Lärmbewältigungsmechanismen stärker aus und werden bereits bei niedrigeren Belästigungsausmaßen gesetzt als in der Zusammenschau mit der Belästigung durch Lärm insgesamt:

**Abbildung 229: Summenscore Lärmcoping und Belästigung durch Lärm gesamt im Schlaf im Mittelwertvergleich**

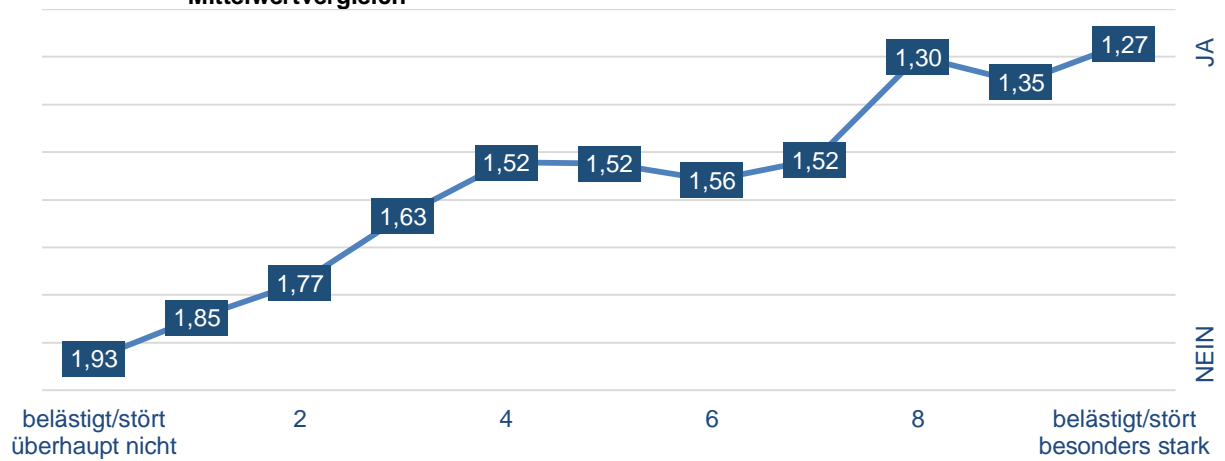

# Empfundene Zu- oder Abnahme des Lärms in Innsbruck

## 1. Lärmbelastungsveränderung im Überblick

Eine deutliche Mehrheit der befragten Innsbruckerinnen und Innsbrucker ist der Meinung, dass die Lärmbelastungen in der Stadt in den letzten Jahren nicht zugenommen haben (57,7%), über 42% hingegen gehen davon aus, dass die Lärmbelastungen zugenommen haben.

Mit knapp 95% relativ einig sind sich die Befragten dahingehend, dass die Lärmbelastungen in den letzten Jahren nicht abgenommen haben:

**Abbildung 230: Empfundene Zu- und Abnahme der Lärmbelastung in Prozent**

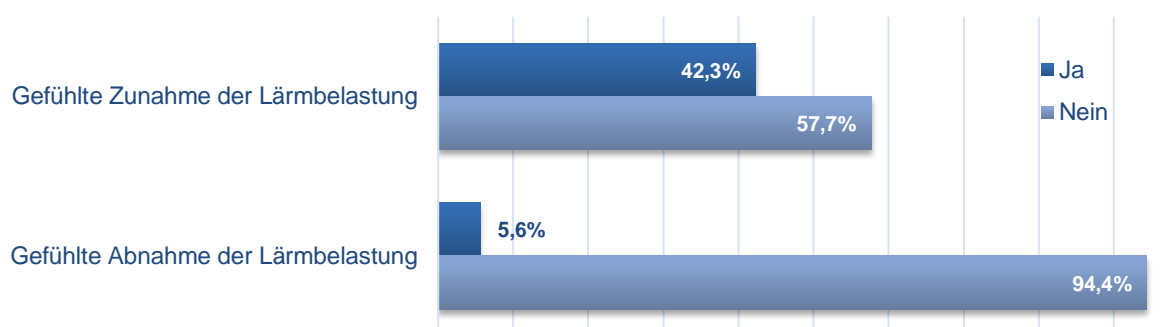

## 2. Lärmbelastungsveränderung und ausgewählte Parameter

Frauen sind deutlich häufiger als Männer der Meinung, die Lärmbelastung habe in den letzten Jahren zugenommen.

Die jüngste Gruppe der Befragten erkennt zu 70% keine Lärmzunahmen in Innsbruck.

Der höchste erreichte Schulabschluss spielt keine zentrale Rolle in der Einschätzung der Zu- oder Abnahme der Lärmbelastungen.

Befragte, die bei offenem oder gekippten Fenster schlafen, über einen Innenhof bzw. eine lärmabgewandte Seite verfügen, oder in ihrem Wohnumfeld durch bauliche Gegebenheiten vor Verkehrslärm geschützt sind, gehen seltener von einer Zunahme der Lärmbelastungen aus, als Innsbruckerinnen und Innsbrucker, deren Wohnung weniger lärmgeschützt sind und die bei geschlossenem Fenster schlafen:

**Tabelle 171: Empfundene Zu- und Abnahme der Lärmbelastung und ausgewählte Parameter**

|                      |                 | Gefühlte Zunahme Lärmbelastung |         |        |         | Gefühlte Abnahme Lärmbelastung |         |        |         |
|----------------------|-----------------|--------------------------------|---------|--------|---------|--------------------------------|---------|--------|---------|
|                      |                 | Ja                             |         | Nein   |         | Ja                             |         | Nein   |         |
|                      |                 | Anzahl                         | Prozent | Anzahl | Prozent | Anzahl                         | Prozent | Anzahl | Prozent |
| <b>Geschlecht</b>    | weiblich        | 250                            | 46,2%   | 291    | 53,8%   | 27                             | 5,0%    | 514    | 95,0%   |
|                      | männlich        | 186                            | 38,0%   | 304    | 62,0%   | 31                             | 6,3%    | 459    | 93,7%   |
| <b>Altersgruppen</b> | 18 bis 40 Jahre | 132                            | 30,0%   | 308    | 70,0%   | 23                             | 5,2%    | 417    | 94,8%   |
|                      | 41 bis 60 Jahre | 167                            | 52,8%   | 149    | 47,2%   | 17                             | 5,4%    | 299    | 94,6%   |

|                                                             |                        |     |        |     |       |    |       |     |        |
|-------------------------------------------------------------|------------------------|-----|--------|-----|-------|----|-------|-----|--------|
|                                                             | über 60 Jahre          | 137 | 49,8%  | 138 | 50,2% | 18 | 6,5%  | 257 | 93,5%  |
| <b>Bildungsschicht</b>                                      | Primär                 | 40  | 40,8%  | 58  | 59,2% | 11 | 11,2% | 87  | 88,8%  |
|                                                             | Sekundär               | 234 | 43,2%  | 308 | 56,8% | 30 | 5,5%  | 512 | 94,5%  |
|                                                             | Tertiär                | 162 | 41,8%  | 226 | 58,2% | 17 | 4,4%  | 371 | 95,6%  |
| <b>Baulicher Schutz vor Verkehrslärm</b>                    | Kaum vorhanden         | 344 | 44,9%  | 422 | 55,1% | 38 | 5,0%  | 728 | 95,0%  |
|                                                             | Vorhanden              | 81  | 34,3%  | 155 | 65,7% | 20 | 8,5%  | 216 | 91,5%  |
| <b>Innenhof bzw. lärm-abgewandte Seite</b>                  | Ja                     | 280 | 39,9%  | 421 | 60,1% | 46 | 6,6%  | 655 | 93,4%  |
|                                                             | Nein                   | 147 | 47,7%  | 161 | 52,3% | 12 | 3,9%  | 296 | 96,1%  |
| <b>Nachtschlaf</b>                                          | Fenster geöffnet       | 334 | 40,7%  | 487 | 59,3% | 46 | 5,6%  | 775 | 94,4%  |
|                                                             | Fenster geschlossen    | 99  | 49,0%  | 103 | 51,0% | 12 | 5,9%  | 190 | 94,1%  |
| <b>Straßenlärm 24h</b>                                      | Stark belastet >55dB   | 251 | 48,6%  | 265 | 51,4% | 27 | 5,2%  | 489 | 94,8%  |
|                                                             | Mittelgradig 45-55dB   | 156 | 38,7%  | 247 | 61,3% | 29 | 7,2%  | 374 | 92,8%  |
|                                                             | Geringbelastet <45dB   | 29  | 25,9%  | 83  | 74,1% | 2  | 1,8%  | 110 | 98,2%  |
| <b>Schienenlärm 24h</b>                                     | Stark belastet >55dB   | 40  | 34,5%  | 76  | 65,5% | 12 | 10,3% | 104 | 89,7%  |
|                                                             | Mittelgradig 45-55dB   | 153 | 47,8%  | 167 | 52,2% | 22 | 6,9%  | 298 | 93,1%  |
|                                                             | Geringbelastet <45dB   | 243 | 40,8%  | 352 | 59,2% | 24 | 4,0%  | 571 | 96,0%  |
| <b>Fluglärm 24h</b>                                         | Stark belastet >55dB   | 44  | 39,3%  | 68  | 60,7% | 5  | 4,5%  | 107 | 95,5%  |
|                                                             | Mittelgradig 45-55dB   | 165 | 45,8%  | 195 | 54,2% | 17 | 4,7%  | 343 | 95,3%  |
|                                                             | Geringbelastet <45dB   | 227 | 40,6%  | 332 | 59,4% | 36 | 6,4%  | 523 | 93,6%  |
| <b>Lebensbedingungen (Summenscore)</b>                      | Nicht gut              | 5   | 100,0% | 0   | 0,0%  | 0  | 0,0%  | 5   | 100,0% |
|                                                             | Durchschnittlich       | 306 | 45,7%  | 364 | 54,3% | 42 | 6,3%  | 628 | 93,7%  |
|                                                             | Sehr gut               | 125 | 35,1%  | 231 | 64,9% | 16 | 4,5%  | 340 | 95,5%  |
| <b>Lebensqualität</b>                                       | Nicht gut              | 8   | 80,0%  | 2   | 20,0% | 0  | 0,0%  | 10  | 100,0% |
|                                                             | Durchschnittlich       | 152 | 52,4%  | 138 | 47,6% | 18 | 6,2%  | 272 | 93,8%  |
|                                                             | Sehr gut               | 276 | 38,1%  | 449 | 61,9% | 39 | 5,4%  | 686 | 94,6%  |
| <b>Lautheit Innsbruck im Vergleich zu anderen Städten</b>   | Ruhiger                | 95  | 32,5%  | 197 | 67,5% | 23 | 7,9%  | 269 | 92,1%  |
|                                                             | Gleich                 | 247 | 44,8%  | 304 | 55,2% | 25 | 4,5%  | 526 | 95,5%  |
|                                                             | Lauter                 | 91  | 52,3%  | 83  | 47,7% | 10 | 5,7%  | 164 | 94,3%  |
| <b>Notwendigkeit (weiterer) Maßnahmen zur Lärmreduktion</b> | Ja                     | 356 | 51,5%  | 335 | 48,5% | 38 | 5,5%  | 653 | 94,5%  |
|                                                             | Nein                   | 44  | 22,9%  | 148 | 77,1% | 13 | 6,8%  | 179 | 93,2%  |
| <b>Lärmempfindlichkeit</b>                                  | Nicht lärmempfindlich  | 90  | 32,7%  | 185 | 67,3% | 20 | 7,3%  | 255 | 92,7%  |
|                                                             | Durchschnittlich       | 257 | 44,0%  | 327 | 56,0% | 33 | 5,7%  | 551 | 94,3%  |
|                                                             | Sehr lärmempfindlich   | 89  | 51,7%  | 83  | 48,3% | 5  | 2,9%  | 167 | 97,1%  |
| <b>Ausgesetztheit Lärm gesamt</b>                           | Gering exponiert       | 56  | 21,5%  | 205 | 78,5% | 17 | 6,5%  | 244 | 93,5%  |
|                                                             | Mittelgradig exponiert | 285 | 45,2%  | 345 | 54,8% | 37 | 5,9%  | 593 | 94,1%  |
|                                                             | Stark exponiert        | 95  | 67,9%  | 45  | 32,1% | 4  | 2,9%  | 136 | 97,1%  |

Anm.: Die Fallzahlen in der Gruppe von Befragten, die von einer Abnahme der Lärmbelastung in den letzten Jahren ausgehen, sind in einigen der obenstehenden Subgruppen zu gering für solide Auswertungen.

Die gegebene Lärmbelastung durch die Verkehrsträger zeigt keine ausgeprägten Beziehungen zur Einschätzung der Befragten, ob sich die Lärmbelastung in Innsbruck in den vergangenen Jahren verändert hat. Deutlich stärker korrespondieren Faktoren wie die Einschätzung der eigenen Lebensquali-

tät, die Lebens- und Wohnbedingungen, die eigene Lärmempfindlichkeit und das Gefühl der Ausgesetztheit gegenüber Lärm.

Personen, die davon ausgehen, dass es in Innsbruck ruhiger als in anderen vergleichbaren Städten Österreichs ist und die keine (weiteren) Maßnahmen zur Lärmreduktion für angemessen halten, gehen zu mehr als zwei Dritteln davon aus, dass es in den vergangenen Jahren nicht lauter geworden ist.

### 3. Lärmbelastungsveränderung und Lärmbelästigung

Die empfundene Störung durch Lärm zeigt mit steigendem Ausmaß unabhängig von der Quelle der Lärmbelästigung in Zusammenschau mit der Einschätzung der Lärmbelastungsveränderung in Innsbruck sehr einheitlich eine deutlich steigende Tendenz der Befragten, von einer gefühlten Zunahme der Lärmbelastung auszugehen:

**Abbildung 231: Empfundene Zunahme der Lärmbelastung und Belästigung durch Lärm insgesamt im Mittelwertvergleich**

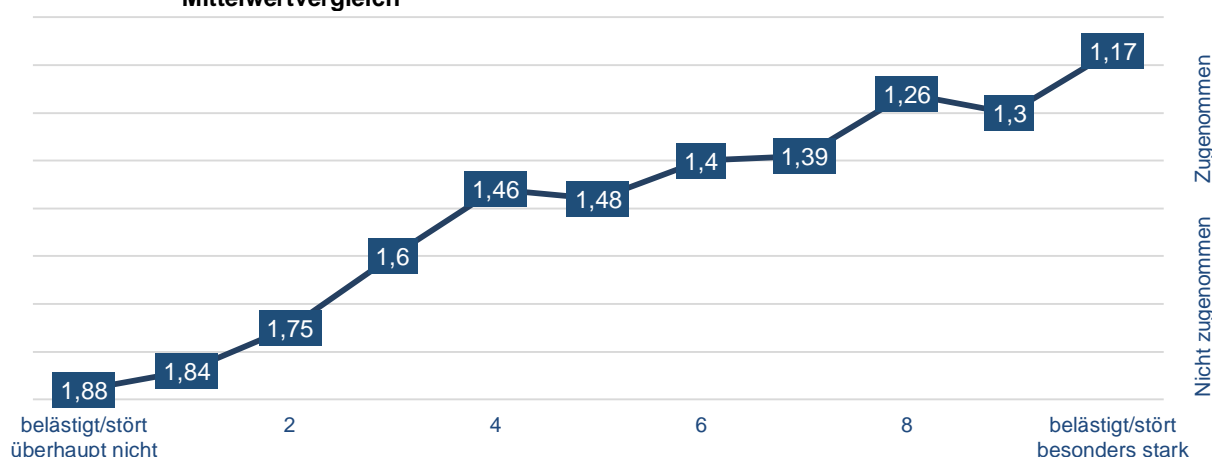

Die stark ansteigende Einschätzung der Zunahme der Lärmbelastungen in Innsbruck in den letzten Jahren ist bei steigender Belästigung durch Schienenverkehrslärm am geringsten, in allen anderen Belästigungskategorien nach Quelle relativ stark ausgeprägt. Rund 70% der Starkbelästigten gehen relativ unabhängig von der Quelle der Belästigung (Ausnahme Schienenverkehrslärmbelästigung) von Lärmzunahmen aus, während es bei den geringbelästigten Befragten im Mittel nur ein Drittel ist:

**Tabelle 172: Empfundene Zu- und Abnahme der Lärmbelastung und Belästigung nach Quelle**

|                                              |                        | Gefühlte Zunahme Lärmbelastung |         |        |         | Gefühlte Abnahme Lärmbelastung |         |        |         |
|----------------------------------------------|------------------------|--------------------------------|---------|--------|---------|--------------------------------|---------|--------|---------|
|                                              |                        | Ja                             |         | Nein   |         | Ja                             |         | Nein   |         |
|                                              |                        | Anzahl                         | Prozent | Anzahl | Prozent | Anzahl                         | Prozent | Anzahl | Prozent |
| <b>Belästigung im Schlaf<br/>Lärm gesamt</b> | Gering belästigt       | 220                            | 31,7%   | 475    | 68,3%   | 44                             | 6,3%    | 651    | 93,7%   |
|                                              | Mittelgradig belästigt | 160                            | 62,5%   | 96     | 37,5%   | 13                             | 5,1%    | 243    | 94,9%   |
|                                              | Stark belästigt        | 56                             | 70,0%   | 24     | 30,0%   | 1                              | 1,3%    | 79     | 98,8%   |
| <b>Belästigung<br/>Lärm gesamt</b>           | Gering belästigt       | 69                             | 18,3%   | 309    | 81,7%   | 32                             | 8,5%    | 346    | 91,5%   |
|                                              | Mittelgradig belästigt | 272                            | 51,5%   | 256    | 48,5%   | 24                             | 4,5%    | 504    | 95,5%   |

|                                                                 |                        |     |       |     |       |    |      |     |        |
|-----------------------------------------------------------------|------------------------|-----|-------|-----|-------|----|------|-----|--------|
|                                                                 | Stark belästigt        | 95  | 76,0% | 30  | 24,0% | 2  | 1,6% | 123 | 98,4%  |
| <b>Belästigung<br/>Fluglärm</b>                                 | Gering belästigt       | 162 | 31,8% | 348 | 68,2% | 36 | 7,1% | 474 | 92,9%  |
|                                                                 | Mittelgradig belästigt | 191 | 47,8% | 209 | 52,3% | 20 | 5,0% | 380 | 95,0%  |
|                                                                 | Stark belästigt        | 83  | 68,6% | 38  | 31,4% | 2  | 1,7% | 119 | 98,3%  |
| <b>Belästigung Stras-<br/>senverkehrslärm</b>                   | Gering belästigt       | 155 | 28,8% | 384 | 71,2% | 37 | 6,9% | 502 | 93,1%  |
|                                                                 | Mittelgradig belästigt | 197 | 52,5% | 178 | 47,5% | 17 | 4,5% | 358 | 95,5%  |
|                                                                 | Stark belästigt        | 84  | 71,8% | 33  | 28,2% | 4  | 3,4% | 113 | 96,6%  |
| <b>Belästigung<br/>Baustellenlärm</b>                           | Gering belästigt       | 212 | 31,6% | 458 | 68,4% | 40 | 6,0% | 630 | 94,0%  |
|                                                                 | Mittelgradig belästigt | 148 | 56,1% | 116 | 43,9% | 16 | 6,1% | 248 | 93,9%  |
|                                                                 | Stark belästigt        | 76  | 79,2% | 20  | 20,8% | 2  | 2,1% | 94  | 97,9%  |
| <b>Belästigung<br/>Nachbarschaftslärm</b>                       | Gering belästigt       | 262 | 35,6% | 474 | 64,4% | 42 | 5,7% | 694 | 94,3%  |
|                                                                 | Mittelgradig belästigt | 138 | 56,8% | 105 | 43,2% | 14 | 5,8% | 229 | 94,2%  |
|                                                                 | Stark belästigt        | 36  | 69,2% | 16  | 30,8% | 2  | 3,8% | 50  | 96,2%  |
| <b>Belästigung Lärm von<br/>Passanten und Gast-<br/>stätten</b> | Gering belästigt       | 271 | 36,2% | 477 | 63,8% | 40 | 5,3% | 708 | 94,7%  |
|                                                                 | Mittelgradig belästigt | 133 | 57,1% | 100 | 42,9% | 15 | 6,4% | 218 | 93,6%  |
|                                                                 | Stark belästigt        | 32  | 64,0% | 18  | 36,0% | 3  | 6,0% | 47  | 94,0%  |
| <b>Belästigung Schie-<br/>nenverkehrslärm</b>                   | Gering belästigt       | 338 | 40,2% | 502 | 59,8% | 45 | 5,4% | 795 | 94,6%  |
|                                                                 | Mittelgradig belästigt | 81  | 50,3% | 80  | 49,7% | 11 | 6,8% | 150 | 93,2%  |
|                                                                 | Stark belästigt        | 17  | 56,7% | 13  | 43,3% | 2  | 6,7% | 28  | 93,3%  |
| <b>Belästigung<br/>Erschütterungen</b>                          | Gering belästigt       | 335 | 38,9% | 527 | 61,1% | 51 | 5,9% | 811 | 94,1%  |
|                                                                 | Mittelgradig belästigt | 74  | 54,8% | 61  | 45,2% | 7  | 5,2% | 128 | 94,8%  |
|                                                                 | Stark belästigt        | 27  | 79,4% | 7   | 20,6% | 0  | 0,0% | 34  | 100,0% |
| <b>Belästigung Lärm aus<br/>Gewerbe u.<br/>Industrie</b>        | Gering belästigt       | 376 | 40,1% | 561 | 59,9% | 57 | 6,1% | 880 | 93,9%  |
|                                                                 | Mittelgradig belästigt | 48  | 60,8% | 31  | 39,2% | 1  | 1,3% | 78  | 98,7%  |
|                                                                 | Stark belästigt        | 12  | 80,0% | 3   | 20,0% | 0  | 0,0% | 15  | 100,0% |
| <b>Belästigung<br/>Autobahnlärm</b>                             | Gering belästigt       | 389 | 41,1% | 558 | 58,9% | 55 | 5,8% | 892 | 94,2%  |
|                                                                 | Mittelgradig belästigt | 32  | 51,6% | 30  | 48,4% | 2  | 3,2% | 60  | 96,8%  |
|                                                                 | Stark belästigt        | 15  | 68,2% | 7   | 31,8% | 1  | 4,5% | 21  | 95,5%  |

Anm.: Die Fallzahlen in der Gruppe von Befragten, die von einer Abnahme der Lärmbelastung in den letzten Jahren ausgehen, sind in einigen der obenstehenden Subgruppen zu gering für solide Auswertungen.

## Einschätzung der Auswirkungen von Lärm auf die Gesundheit

### 1. Auswirkungen von Lärm im Überblick

Mehr als drei Viertel (75,8%) der befragten Innsbruckerinnen und Innsbrucker gehen davon aus, dass sich Lärm *eher stark* bis *sehr stark* negativ auf die Gesundheit auswirkt, 21% nehmen an, dass Lärmbelastungen nur geringe Gesundheitswirkungen aufweisen:

**Abbildung 232: Einschätzung der negativen Wirkung von Lärm auf die Gesundheit in Prozent**

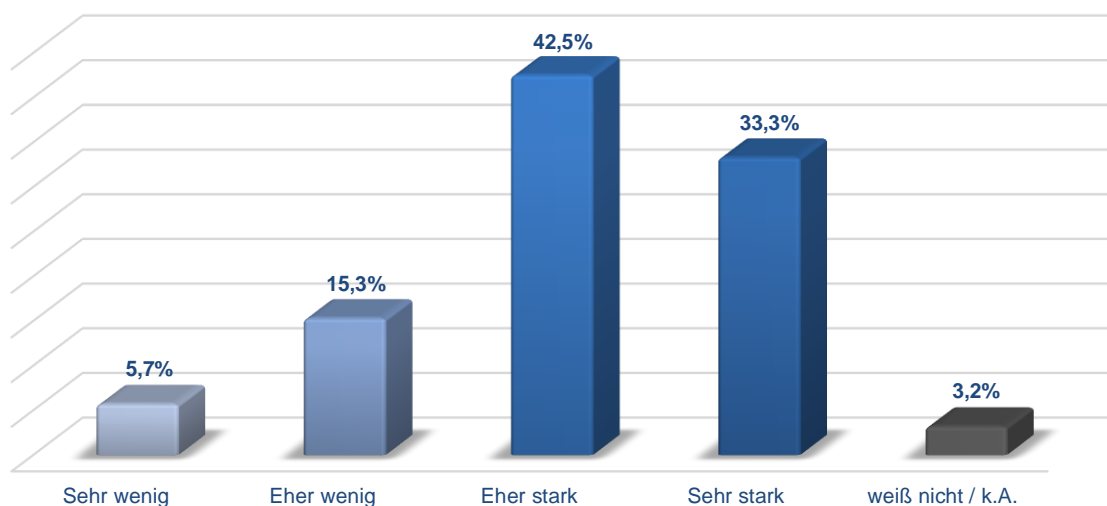

**Tabelle 173: Einschätzung der negativen Wirkung von Lärm auf die Gesundheit gruppiert**

|        |             | Häufigkeit | Gültige Prozente | Kumulierte Prozente |
|--------|-------------|------------|------------------|---------------------|
| Gültig | Wenig       | 217        | 21,0             | 21,0                |
|        | Stark       | 781        | 75,8             | 96,8                |
|        | w.n. / k.A. | 33         | 3,2              | 100,0               |
|        | Gesamt      | 1031       | 100,0            |                     |

Im Mittel gehen die Befragten von einer *eher starken* negativen Gesundheitswirkung von Lärm aus (Mittelwert 3,1 von maximal 4,0):

**Tabelle 174: Mittelwert der Einschätzung der negativen Wirkung von Lärm auf die Gesundheit**

| Mittelwert | N   | Standardabweichung | Standardfehler des Mittelwertes |
|------------|-----|--------------------|---------------------------------|
| 3,07       | 998 | ,857               | ,027                            |

\* ohne Berücksichtigung der 33 Probandinnen und Probanden, die auf diese Frage mit weiß nicht / keine Angabe antworteten.



## 2. Auswirkungen von Lärm und ausgewählte Parameter

Männer gehen von einer deutlich geringeren negativen Wirkung von Lärm auf die Gesundheit aus als Frauen, während das Alter der Befragten kaum Einflüsse zeigt.

Stark unterschiedlich antworten Befragte in Abhängigkeit von ihrem höchsten bisher erreichten höchsten Schulabschluss: Von den Akademikerinnen und Akademikern gehen über 86% davon aus, dass Lärm starke negative Auswirkungen auf die Gesundheit hat, während bei den Pflichtschulabgängerinnen und –Abgängern etwas mehr als 61% dieser Meinung sind.

**Abbildung 233: Einschätzung der negativen Wirkung von Lärm auf die Gesundheit und höchster erreichter Schulabschluss (gruppiert, ohne Antwortkategorie w.n. / k.A.)**

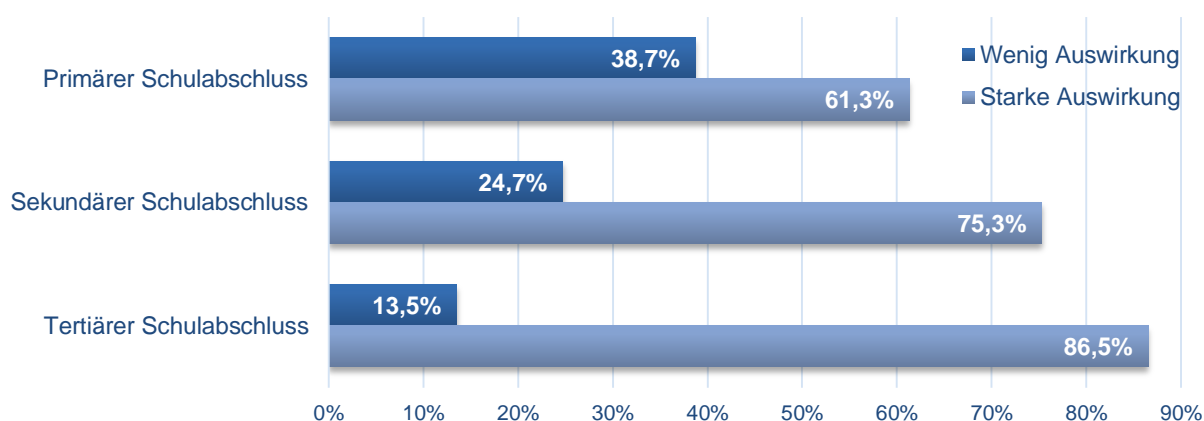

Die vorhandene Lärmbelastung zeigt nur beim Straßenverkehrslärm Beziehungen zur Einschätzung der negativen Wirkung von Lärm auf die Gesundheit auf. Diese sind vergleichsweise gering ausgeprägt.

Deutlich stärker fallen die Korrelationen zum Ausmaß der Lärmempfindlichkeit, dem Gefühl der Ausgesetztheit gegenüber Lärm, sowie den Belästigungsauswertungen aus:

**Tabelle 175: Einschätzung der negativen Wirkung von Lärm auf die Gesundheit und ausgewählte Parameter (gruppiert)**

|                        |                           | Einschätzung des Ausmaßes negativer Auswirkungen von Lärm auf die Gesundheit (gruppiert) |            |        |            |
|------------------------|---------------------------|------------------------------------------------------------------------------------------|------------|--------|------------|
|                        |                           | Wenig                                                                                    |            | Stark  |            |
|                        |                           | Anzahl                                                                                   | Zeilen (%) | Anzahl | Zeilen (%) |
| <b>Geschlecht</b>      | weiblich                  | 94                                                                                       | 17,9%      | 431    | 82,1%      |
|                        | männlich                  | 123                                                                                      | 26,0%      | 350    | 74,0%      |
| <b>Altersgruppen</b>   | 18 bis 40 Jahre           | 97                                                                                       | 22,8%      | 328    | 77,2%      |
|                        | 41 bis 60 Jahre           | 60                                                                                       | 19,5%      | 248    | 80,5%      |
|                        | über 60 Jahre             | 60                                                                                       | 22,6%      | 205    | 77,4%      |
| <b>Bildungsschicht</b> | Primärer Schulabschluss   | 36                                                                                       | 38,7%      | 57     | 61,3%      |
|                        | Sekundärer Schulabschluss | 129                                                                                      | 24,7%      | 394    | 75,3%      |
|                        | Tertiärer Schulabschluss  | 51                                                                                       | 13,5%      | 328    | 86,5%      |
| <b>Straßenlärm 24h</b> | Stark belastet >55dB      | 125                                                                                      | 25,2%      | 372    | 74,8%      |

|                                                             |                               |     |       |     |       |
|-------------------------------------------------------------|-------------------------------|-----|-------|-----|-------|
|                                                             | Mittelgradig belastet 45-55dB | 78  | 19,9% | 313 | 80,1% |
|                                                             | Gering belastet <45dB         | 14  | 12,7% | 96  | 87,3% |
| <b>Schienenlärm 24h</b>                                     | Stark belastet >55dB          | 29  | 25,2% | 86  | 74,8% |
|                                                             | Mittelgradig belastet 45-55dB | 78  | 25,3% | 230 | 74,7% |
|                                                             | Gering belastet <45dB         | 110 | 19,1% | 465 | 80,9% |
| <b>Fluglärm 24h</b>                                         | Stark belastet >55dB          | 25  | 23,6% | 81  | 76,4% |
|                                                             | Mittelgradig belastet 45-55dB | 64  | 18,2% | 287 | 81,8% |
|                                                             | Gering belastet <45dB         | 128 | 23,7% | 413 | 76,3% |
| <b>Notwendigkeit (weiterer) Maßnahmen zur Lärmreduktion</b> | Ja                            | 102 | 15,1% | 575 | 84,9% |
|                                                             | Nein                          | 73  | 40,1% | 109 | 59,9% |
| <b>Lärmempfindlichkeit</b>                                  | Nicht lärmempfindlich         | 73  | 28,0% | 188 | 72,0% |
|                                                             | Durchschnittlich              | 123 | 21,6% | 447 | 78,4% |
|                                                             | Sehr lärmempfindlich          | 21  | 12,6% | 146 | 87,4% |
| <b>Belästigung im Schlaf</b>                                | Gering belästigt              | 164 | 24,3% | 511 | 75,7% |
|                                                             | Mittelgradig belästigt        | 46  | 18,9% | 197 | 81,1% |
|                                                             | Stark belästigt               | 7   | 8,8%  | 73  | 91,3% |
| <b>Belästigung Lärm gesamt</b>                              | Gering belästigt              | 100 | 27,7% | 261 | 72,3% |
|                                                             | Mittelgradig belästigt        | 102 | 19,9% | 411 | 80,1% |
|                                                             | Stark belästigt               | 15  | 12,1% | 109 | 87,9% |

Befragte, welche davon ausgehen, dass die negativen Wirkungen von Lärm auf die Gesundheit stark ausgeprägt sind, sind auch wesentlich häufiger der Ansicht, dass (weitere) Maßnahmen zur Lärmreduktion in Innsbruck getroffen werden sollten und umgekehrt:

**Abbildung 234: Einschätzung der negativen Wirkung von Lärm auf die Gesundheit und Notwendigkeit (weiterer Maßnahmen) zur Lärmreduktion (gruppiert, ohne Antwortkategorie w.n. / k.A.)**

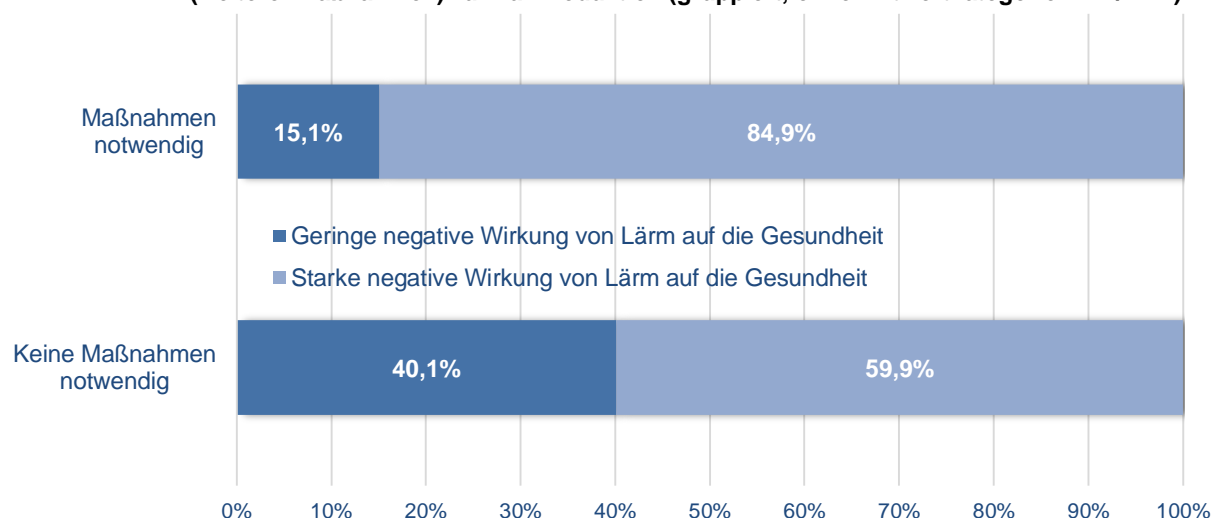

## Bekanntheit der Umgebungslärmkarten

Mittels einer einfachen Ja/Nein-Frage wurde die Bekanntheit der Umgebungslärmkarten (<http://www.laerminfo.at/>) abgefragt. Etwas mehr als 21% aller Befragten haben schon einmal von Umgebungslärmkarten gehört, oder sich diese sogar angesehen. Mehr als drei Viertel der Probandinnen und Probanden sind diese unbekannt:

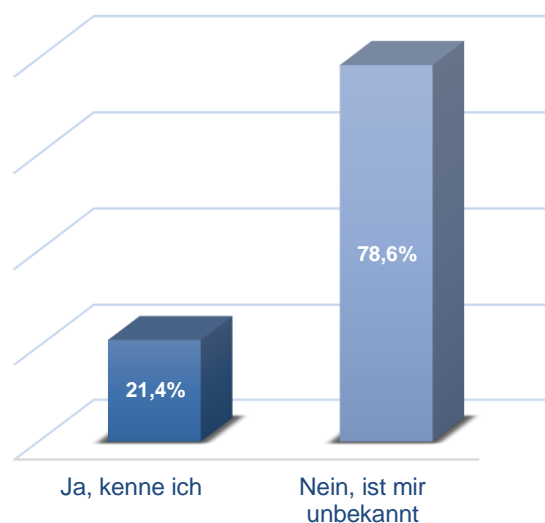

**Abbildung 235: Bekanntheit der Umgebungslärmkarten in Prozent**

- Die Bekanntheit der Umgebungslärmkarten nimmt mit zunehmendem Alter leicht ab.
- Männer geben doppelt so häufig wie Frauen an, dass ihnen Umgebungslärmkarten bekannt sind.
- Je höher der höchste bisher erreichte Schulabschluss, desto eher haben Befragte schon von Umgebungslärmkarten gehört oder sich diese angesehen.
- Es lassen sich keine eindeutigen Zusammenhänge zwischen der Bekanntheit der Umgebungslärmkarten und der vorhandenen Lärmbelastung, dem Gefühl der Ausgesetzttheit gegenüber Lärm, der Lärmempfindlichkeit, oder der Belästigung durch Lärm nach Quelle herstellen.
- Befragte Innsbruckerinnen und Innsbrucker, die angeben, schon zumindest einmal mit Behörden über die Lärmbelastung gesprochen zu haben, kennen die Umgebungslärmkarten nicht häufiger, als jene, die das noch nie getan haben. Befragte, die (weitere) Maßnahmen zur Lärmreduktion in Innsbruck für sinnvoll halten, geben deutlich häufiger an, von Umgebungslärmkarten schon gehört oder sich diese angesehen zu haben.

**Tabelle 176: Bekanntheit der Umgebungslärmkarten und ausgewählte Parameter (gruppiert)**

|                                                             |                           | Bekanntheitsgrad Umgebungslärmkarten |            |                         |            |
|-------------------------------------------------------------|---------------------------|--------------------------------------|------------|-------------------------|------------|
|                                                             |                           | Ja, kenne ich                        |            | Nein, ist mir unbekannt |            |
|                                                             |                           | Anzahl                               | Zeilen (%) | Anzahl                  | Zeilen (%) |
| <b>Geschlecht</b>                                           | weiblich                  | 80                                   | 14,8%      | 461                     | 85,2%      |
|                                                             | männlich                  | 141                                  | 28,8%      | 349                     | 71,2%      |
| <b>Altersgruppen</b>                                        | 18 bis 40 Jahre           | 102                                  | 23,2%      | 338                     | 76,8%      |
|                                                             | 41 bis 60 Jahre           | 69                                   | 21,8%      | 247                     | 78,2%      |
|                                                             | über 60 Jahre             | 50                                   | 18,2%      | 225                     | 81,8%      |
| <b>Bildungsschicht</b>                                      | Primärer Schulabschluss   | 10                                   | 10,2%      | 88                      | 89,8%      |
|                                                             | Sekundärer Schulabschluss | 99                                   | 18,3%      | 443                     | 81,7%      |
|                                                             | Tertiärer Schulabschluss  | 112                                  | 28,9%      | 276                     | 71,1%      |
| <b>Notwendigkeit (weiterer) Maßnahmen zur Lärmreduktion</b> | Ja                        | 168                                  | 24,3%      | 523                     | 75,7%      |
|                                                             | Nein                      | 26                                   | 13,5%      | 166                     | 86,5%      |

## Einschätzung des Lärmniveaus im Städtevergleich

### 1. Lärmniveau im Städtevergleich im Überblick

Bei der Frage, wie laut es in Innsbruck im Vergleich zu anderen Städten in Österreich ist, gehen die Meinungen der Befragten auseinander. Während etwas mehr als 28% der Meinung sind, es wäre in Innsbruck *ruhiger* bis *viel ruhiger*, gehen knapp 17% davon aus, dass es *lauter* bis *viel lauter* sei. Etwas mehr als die Hälfte der Befragten glaubt, dass das Lärmniveau in Innsbruck in etwa dem anderer österreichischer Städte entspricht:

**Abbildung 236: Einschätzung des Lärmniveaus im Städtevergleich in Prozent**

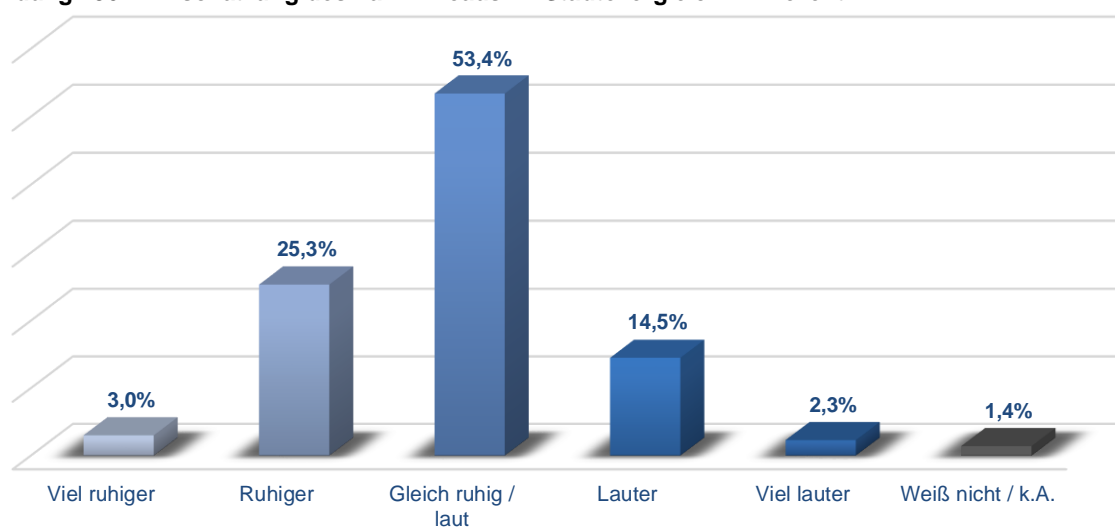

**Tabelle 177: Einschätzung des Lärmniveaus im Städtevergleich gruppiert**

|               | Häufigkeit | Gültige Prozente | Kumulierte Prozente |
|---------------|------------|------------------|---------------------|
| Ruhiger       | 292        | 28,3             | 28,3                |
| Gleich        | 551        | 53,4             | 81,8                |
| Gültig Lauter | 174        | 16,9             | 98,6                |
| Keine Angabe  | 14         | 1,4              | 100,0               |
| Gesamt        | 1031       | 100,0            |                     |

Im Mittel gehen die Befragten davon aus, dass es Innsbruck in etwa *gleich ruhig oder laut* im Vergleich zu anderen österreichischen Städten ist, mit leichter Tendenz, dass es etwas ruhiger sei:

**Tabelle 178: Mittelwert der Einschätzung des Lärmniveaus im Städtevergleich**

| Mittelwert | N    | Standardabweichung | Standardfehler des Mittelwertes |
|------------|------|--------------------|---------------------------------|
| 2,88       | 1017 | ,778               | ,024                            |

\* ohne Berücksichtigung der 24 Probandinnen und Probanden, die auf diese Frage mit weiß nicht / keine Angabe antworteten.

## 2. Lärmniveau im Städtevergleich und einzelne Parameter

Vor allem jüngere Befragte und Männer streuen in ihrer Meinung stärker als Frauen und ältere Befragte und halten Innsbruck häufiger einerseits für weniger, andererseits für stärker lärmbelastet als andere Städte Österreichs. Ältere Befragte und Frauen sind hingegen mit größerer Mehrheit der Meinung, es sei in Innsbruck gleich laut.

Je höher der höchste bisher erreichte Schulabschluss, desto eher glauben Befragte es sei in Innsbruck lauter als in vergleichbaren Städten.

Die Bezüge zwischen der Einschätzung, wie laut es in Innsbruck im Vergleich zu anderen Städten in Österreich ist und der vorhandenen Lärmbelastung nach Quelle in der Wohnumgebung der Befragten sind nicht eindeutig. Stärker Lärmbelastete sind nicht per se der Meinung, es sei in Innsbruck lauter.

Befragte, die in ihrem Wohnumfeld über eine lärmabgewandte Seite, einen Innenhof oder baulichen Schutz vor Verkehrslärm verfügen, schätzen Innsbruck eher als ruhiger ein, als Probandinnen und Probanden, deren Wohnung stärker lärmexponiert ist.

Weniger lärmempfindliche Befragte schätzen Innsbruck im Städtevergleich eher als ruhiger ein, als sich selbst als stärker lärmempfindlich wahrnehmende Personen:

**Abbildung 237: Einschätzung des Lärmniveaus und Lärmempfindlichkeit im Mittelwertvergleich**

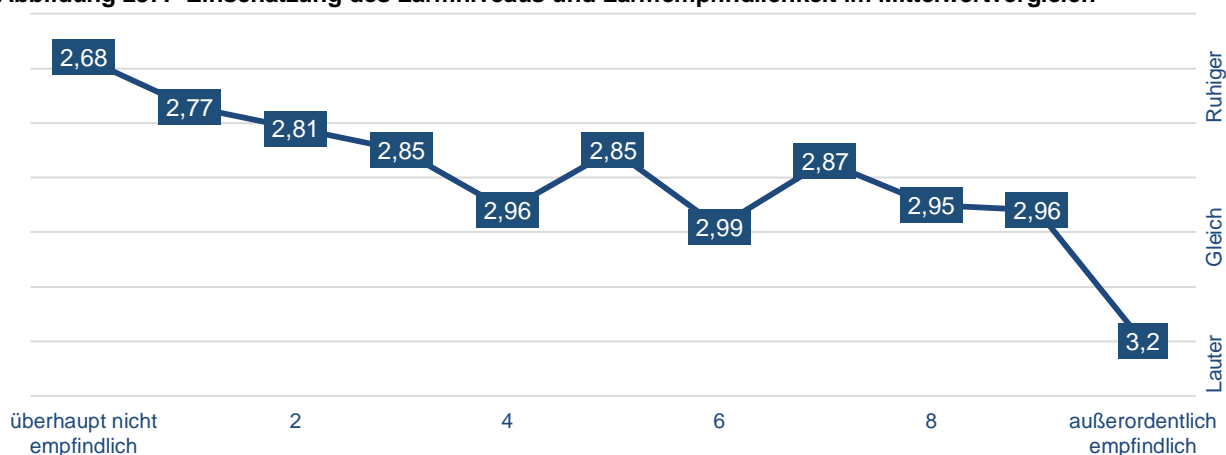

Vergleichbares gilt für diejenigen, die ihre persönliche Lebensqualität und ihre Wohn- und Lebensbedingungen höher einstufen und sich weniger lärmexponiert empfinden.

Befragte, die (weitere) Maßnahmen zur Lärmreduktion in Innsbruck für sinnvoll erachten, halten Innsbruck deutlich häufiger für lauter als andere vergleichbare Städte Österreichs.

Aus den Auswertungen in Zusammenschau mit den Belästigungsreaktionen ist ersichtlich, dass die Frage nach dem Lärmniveau von Innsbruck im Städtevergleich von den Befragten stark auf den Verkehrslärm und dabei vor allem auf den Straßenverkehrslärm fokussiert wird. Insgesamt sind die Unterschiede zwischen den sich stark gestört / belästigt fühlenden Befragten und den eher geringfügig Belästigten deutlich ausgeprägt:

**Abbildung 238: Einschätzung des Lärmniveaus und Belästigung durch Lärm gesamt und Lärm gesamt im Schlaf (gruppiert)**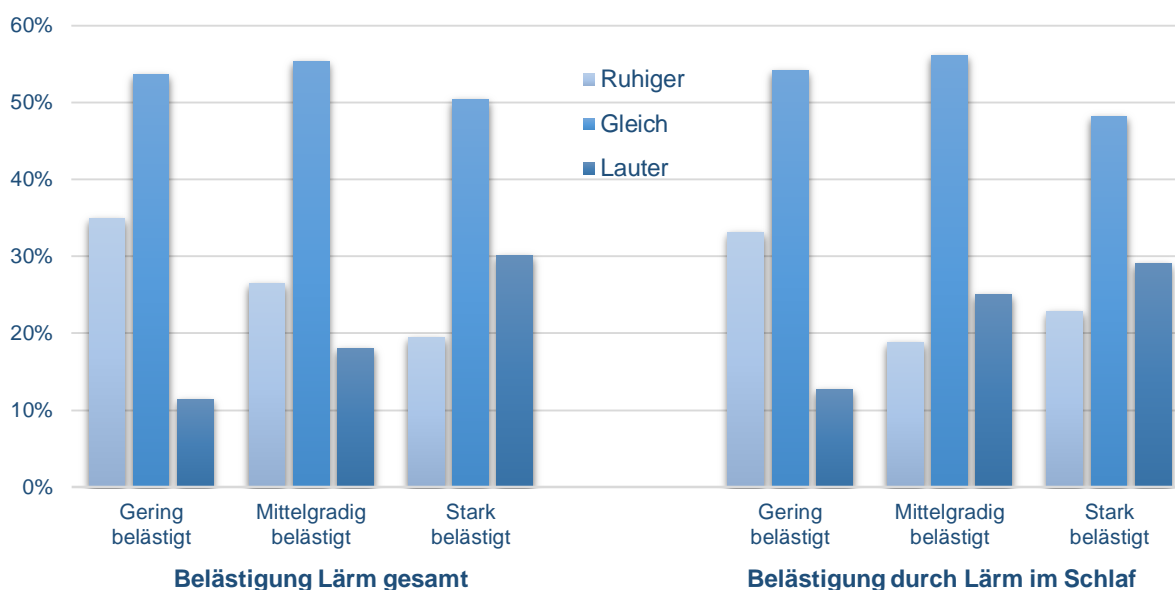**Tabelle 179: Einschätzung des Lärmniveaus im Städtevergleich und ausgewählte Parameter**

|                                           |                               | Lautheit Gesamtlärm in Innsbruck im Vergleich zu anderen Städten Österreichs |         |        |         |        |         |
|-------------------------------------------|-------------------------------|------------------------------------------------------------------------------|---------|--------|---------|--------|---------|
|                                           |                               | Ruhiger                                                                      |         | Gleich |         | Lauter |         |
|                                           |                               | Anzahl                                                                       | Prozent | Anzahl | Prozent | Anzahl | Prozent |
| <b>Geschlecht</b>                         | weiblich                      | 144                                                                          | 27,0%   | 309    | 57,9%   | 81     | 15,2%   |
|                                           | männlich                      | 148                                                                          | 30,6%   | 242    | 50,1%   | 93     | 19,3%   |
| <b>Altersgruppen</b>                      | 18 bis 40 Jahre               | 149                                                                          | 34,4%   | 204    | 47,1%   | 80     | 18,5%   |
|                                           | 41 bis 60 Jahre               | 84                                                                           | 26,7%   | 176    | 55,9%   | 55     | 17,5%   |
|                                           | über 60 Jahre                 | 59                                                                           | 21,9%   | 171    | 63,6%   | 39     | 14,5%   |
| <b>Bildungsschicht</b>                    | Primärer Schulabschluss       | 33                                                                           | 34,0%   | 50     | 51,5%   | 14     | 14,4%   |
|                                           | Sekundärer Schulabschluss     | 160                                                                          | 29,9%   | 290    | 54,2%   | 85     | 15,9%   |
|                                           | Tertiärer Schulabschluss      | 98                                                                           | 25,7%   | 209    | 54,7%   | 75     | 19,6%   |
| <b>Baulicher Schutz vor Verkehrslärm</b>  | Nicht bis kaum vorhanden      | 202                                                                          | 26,7%   | 417    | 55,2%   | 137    | 18,1%   |
|                                           | Vorhanden                     | 80                                                                           | 34,5%   | 120    | 51,7%   | 32     | 13,8%   |
| <b>Innenhof bzw. lärmabgewandte Seite</b> | Ja                            | 214                                                                          | 31,0%   | 362    | 52,4%   | 115    | 16,6%   |
|                                           | Nein                          | 72                                                                           | 23,7%   | 178    | 58,6%   | 54     | 17,8%   |
| <b>Straßenlärm 24h</b>                    | Stark belastet >55dB          | 138                                                                          | 26,9%   | 269    | 52,4%   | 106    | 20,7%   |
|                                           | Mittelgradig belastet 45-55dB | 130                                                                          | 32,7%   | 212    | 53,4%   | 55     | 13,9%   |
|                                           | Gering belastet <45dB         | 24                                                                           | 22,4%   | 70     | 65,4%   | 13     | 12,1%   |
| <b>Schienenlärm 24h</b>                   | Stark belastet >55dB          | 29                                                                           | 25,2%   | 70     | 60,9%   | 16     | 13,9%   |
|                                           | Mittelgradig belastet 45-55dB | 92                                                                           | 29,0%   | 159    | 50,2%   | 66     | 20,8%   |
|                                           | Gering belastet <45dB         | 171                                                                          | 29,2%   | 322    | 55,0%   | 92     | 15,7%   |
| <b>Fluglärm 24h</b>                       | Stark belastet >55dB          | 33                                                                           | 29,5%   | 66     | 58,9%   | 13     | 11,6%   |
|                                           | Mittelgradig belastet 45-55dB | 108                                                                          | 30,3%   | 172    | 48,3%   | 76     | 21,3%   |

|                                              |                        |      |       |      |       |      |       |
|----------------------------------------------|------------------------|------|-------|------|-------|------|-------|
|                                              | Gering belastet <45dB  | 151  | 27,5% | 313  | 57,0% | 85   | 15,5% |
| <b>Lebensbedingungen<br/>(Summenscore)</b>   | Nicht gut              | 0(*) | 0,0%  | 3(*) | 60,0% | 2(*) | 40,0% |
|                                              | Durchschnittlich       | 169  | 25,6% | 354  | 53,6% | 137  | 20,8% |
|                                              | Sehr gut               | 123  | 34,9% | 194  | 55,1% | 35   | 9,9%  |
| <b>Lebensqualität</b>                        | Nicht gut              | 2(*) | 20,0% | 6    | 60,0% | 2(*) | 20,0% |
|                                              | Durchschnittlich       | 73   | 25,6% | 139  | 48,8% | 73   | 25,6% |
|                                              | Sehr gut               | 217  | 30,3% | 401  | 55,9% | 99   | 13,8% |
| <b>Notwendigkeit (weiterer)</b>              | Ja                     | 172  | 25,2% | 367  | 53,7% | 144  | 21,1% |
| <b>Maßnahmen Lärmreduktion</b>               | Nein                   | 72   | 38,3% | 94   | 50,0% | 22   | 11,7% |
| <b>Lärmempfindlichkeit</b>                   | Nicht lärmempfindlich  | 100  | 36,6% | 135  | 49,5% | 38   | 13,9% |
|                                              | Durchschnittlich       | 157  | 27,4% | 315  | 54,9% | 102  | 17,8% |
|                                              | Sehr lärmempfindlich   | 35   | 20,6% | 101  | 59,4% | 34   | 20,0% |
| <b>Ausgesetzttheit</b>                       | Gering exponiert       | 85   | 33,5% | 139  | 54,7% | 30   | 11,8% |
| <b>Lärm gesamt</b>                           | Mittelgradig exponiert | 180  | 28,8% | 342  | 54,8% | 102  | 16,3% |
|                                              | Stark exponiert        | 27   | 19,4% | 70   | 50,4% | 42   | 30,2% |
| <b>Belästigung im Schlaf<br/>Lärm gesamt</b> | Gering belästigt       | 226  | 33,1% | 370  | 54,2% | 87   | 12,7% |
|                                              | Mittelgradig belästigt | 48   | 18,8% | 143  | 56,1% | 64   | 25,1% |
|                                              | Stark belästigt        | 18   | 22,8% | 38   | 48,1% | 23   | 29,1% |
| <b>Belästigung<br/>Lärm gesamt</b>           | Gering belästigt       | 129  | 35,0% | 198  | 53,7% | 42   | 11,4% |
|                                              | Mittelgradig belästigt | 139  | 26,5% | 291  | 55,4% | 95   | 18,1% |
|                                              | Stark belästigt        | 24   | 19,5% | 62   | 50,4% | 37   | 30,1% |
| <b>Belästigung<br/>Straßenverkehrslärm</b>   | Gering belästigt       | 187  | 35,3% | 280  | 52,8% | 63   | 11,9% |
|                                              | Mittelgradig belästigt | 83   | 22,4% | 208  | 56,2% | 79   | 21,4% |
|                                              | Stark belästigt        | 22   | 18,8% | 63   | 53,8% | 32   | 27,4% |

(\*) zu kleine Fallzahlen für solide Auswertungen

Ohne Antwortkategorie w.n. / k.A.

## Einschätzung des eigenen Lärmbeitrags

### 1. Eigener Lärmbeitrag im Überblick

Der eigene Beitrag zur Gesamtlärmbelastung in Innsbruck wird von den Befragten größtenteils als *sehr gering* bis *gering* eingeschätzt (75,2%). Nur 2,8% sind der Meinung, Sie selber tragen *stark* oder *sehr stark* zur Lärmbelastung bei. 22% gehen davon aus, ihr eigener Lärmbeitrag sei *durchschnittlich*:

**Abbildung 239: Einschätzung des eigenen Lärmbeitrags in Prozent**

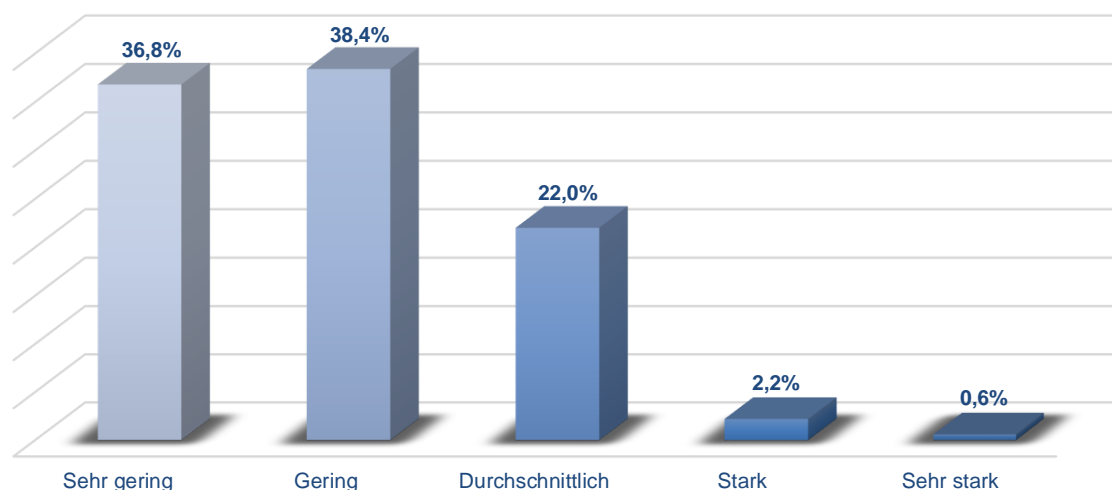

**Tabelle 180: Einschätzung des eigenen Lärmbeitrags gruppiert**

|                  | Häufigkeit | Gültige Prozente | Kumulierte Prozente |
|------------------|------------|------------------|---------------------|
| Gering           | 775        | 75,2             | 75,2                |
| Durchschnittlich | 227        | 22,0             | 97,2                |
| Stark            | 29         | 2,8              | 100,0               |
| Gesamt           | 1031       | 100,0            |                     |

Im Mittel gehen die befragten Innsbruckerinnen und Innsbrucker davon aus, ihr eigener Beitrag zum Lärm in Innsbruck sei *gering*:

**Tabelle 181: Mittelwert Einschätzung des eigenen Lärmbeitrags**

Einschätzung eigener Beitrag zur Gesamtlärmbelastung in Innsbruck

| Mittelwert | N    | Standardabweichung | Standardfehler des Mittelwertes |
|------------|------|--------------------|---------------------------------|
| 1,2764     | 1031 | ,50648             | ,01577                          |



## 2. Eigener Lärmbeitrag und demographische Parameter

Männer gehen von einem etwas größeren eigenen Lärmbeitrag zur Gesamtlärmsituation in Innsbruck aus als Frauen.

Befragte über 60 Jahren glauben zu über 82%, dass sie selbst nur wenig zur Gesamtlärmbelastung in Innsbruck beitragen.

Befragte, welche in Haushalten ohne minderjährige Kinder leben, halten ihren eigenen Lärmbeitrag für geringer als Befragte in Haushalten mit minderjährigen Kindern.

Je höher der bisher erreichte höchste Bildungsabschluss, desto geringer schätzen Befragte ihren eigenen Lärmbeitrag ein:

**Tabelle 182: Einschätzung des eigenen Lärmbeitrags und demographische Parameter (gruppiert)**

|                                                |                           | Einschätzung eigener Beitrag zur Gesamtlärmbelastung |         |                  |         |        |         |
|------------------------------------------------|---------------------------|------------------------------------------------------|---------|------------------|---------|--------|---------|
|                                                |                           | Gering                                               |         | Durchschnittlich |         | Groß   |         |
|                                                |                           | Anzahl                                               | Prozent | Anzahl           | Prozent | Anzahl | Prozent |
| <b>Geschlecht</b>                              | weiblich                  | 421                                                  | 77,8%   | 109              | 20,1%   | 11     | 2,0%    |
|                                                | männlich                  | 354                                                  | 72,2%   | 118              | 24,1%   | 18     | 3,7%    |
| <b>Altersgruppen</b>                           | 18 bis 40 Jahre           | 323                                                  | 73,4%   | 104              | 23,6%   | 13     | 3,0%    |
|                                                | 41 bis 60 Jahre           | 225                                                  | 71,2%   | 80               | 25,3%   | 11     | 3,5%    |
|                                                | über 60 Jahre             | 227                                                  | 82,5%   | 43               | 15,6%   | 5      | 1,8%    |
| <b>Haushalt mit/ohne minder-jährige Kinder</b> | Haushalt ohne Kinder      | 586                                                  | 76,9%   | 154              | 20,2%   | 22     | 2,9%    |
|                                                | Haushalt mit Kindern      | 189                                                  | 70,3%   | 73               | 27,1%   | 7      | 2,6%    |
| <b>Bildungsschicht</b>                         | Primärer Schulabschluss   | 69                                                   | 70,4%   | 27               | 27,6%   | 2      | 2,0%    |
|                                                | Sekundärer Schulabschluss | 405                                                  | 74,7%   | 118              | 21,8%   | 19     | 3,5%    |
|                                                | Tertiärer Schulabschluss  | 298                                                  | 76,8%   | 82               | 21,1%   | 8      | 2,1%    |

## 3. Eigener Lärmbeitrag und Mobilitätsverhalten

Pendlerinnen und Pendler schätzen ihren eigenen Lärmbeitrag zur Gesamtlärmbelastung in Innsbruck deutlich höher ein als Befragte, welche nicht zu Arbeits- oder Ausbildungszwecken pendeln.

Unter den Pendlerinnen und Pendlern glauben diejenigen, welche ein Kraftfahrzeug als vorrangiges Verkehrsmittel auf dem Weg zum Ausbildungs- oder Arbeitsplatz benutzen, einen deutlich größeren Beitrag zur Gesamtlärmbelastung in Innsbruck beizusteuern, als alle anderen. Zwischen den Benutzerinnen und Benutzern von Eisenbahn, Linienbussen und öffentlichen Verkehrsmitteln, Fußgängern und Fahrradfahrerinnen und -Fahrern sind die Unterschiede hingegen gering. Den geringsten Lärmbeitrag erkennen (ohne Adjustierung anderer Prädiktoren und Kovariablen) diejenigen für sich, die mit dem Fahrrad unterwegs sind:

**Abbildung 240: Einschätzung des eigenen Lärmbeitrags und vorrangiges Verkehrsmittel im Mittelwertvergleich**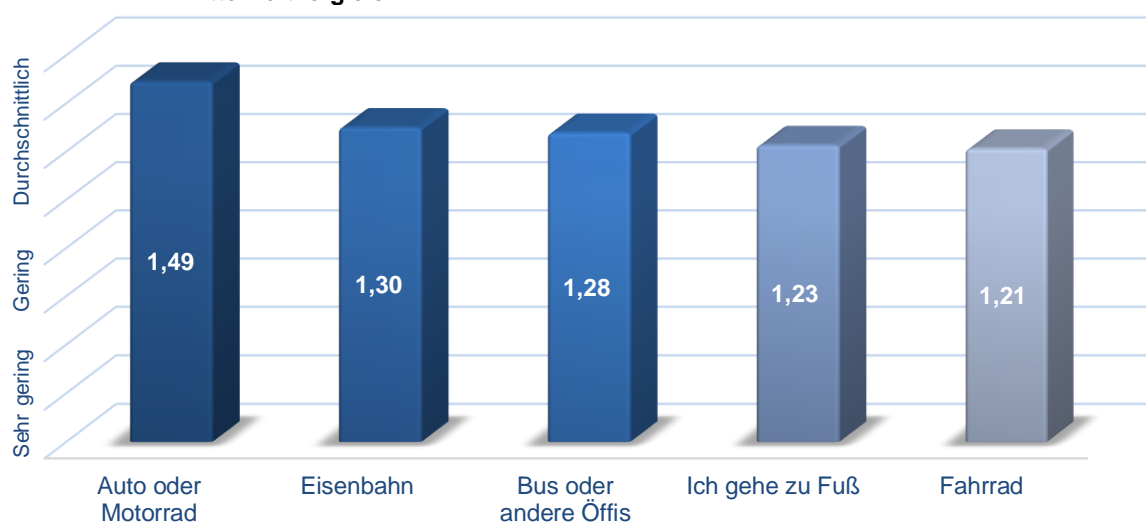

Ohne Nichtzutreffende (in Pension ...)

Wird das Mobilitätsverhalten der Befragten nach der Häufigkeit der Nutzung einzelner Verkehrsmittel unabhängig vom berufs- oder ausbildungsabhängigen Pendeln abgefragt und aufgeschlüsselt, können die Unterschiede in der Empfindung des eigenen Lärmbeitrages zur Gesamtlärmsituation in Innsbruck verfeinert werden: Diejenigen befragten Innsbruckerinnen und Innsbrucker, die sich regelmäßig mit öffentlichen Verkehrsmitteln bewegen, glauben (ohne Adjustierung anderer Prädiktoren und Kovariablen) den geringsten Beitrag zum Gesamtlärm beizusteuern, (fast) tägliche Autofahrerinnen und Autofahrer den größten. Die Unterschiede zwischen diesen beiden Extremgruppen fallen sehr deutlich aus.

Zwischen regelmäßigen Fußgängerinnen und Fußgängern und den (fast) täglichen Nutzerinnen und Nutzern von Fahrrädern bestehen kaum Unterschiede. Auch die gelegentlichen Nutzerinnen und Nutzer von Flugzeugen (Antwortkategorie *Mehrmals pro Jahr*<sup>16</sup>) erkennen für sich keinen per se größeren Lärmbeitrag:

**Abbildung 241: Eigener Lärmbeitrag durchschnittlich bis groß und Mobilitätsverhalten im Extremgruppenvergleich in Prozent**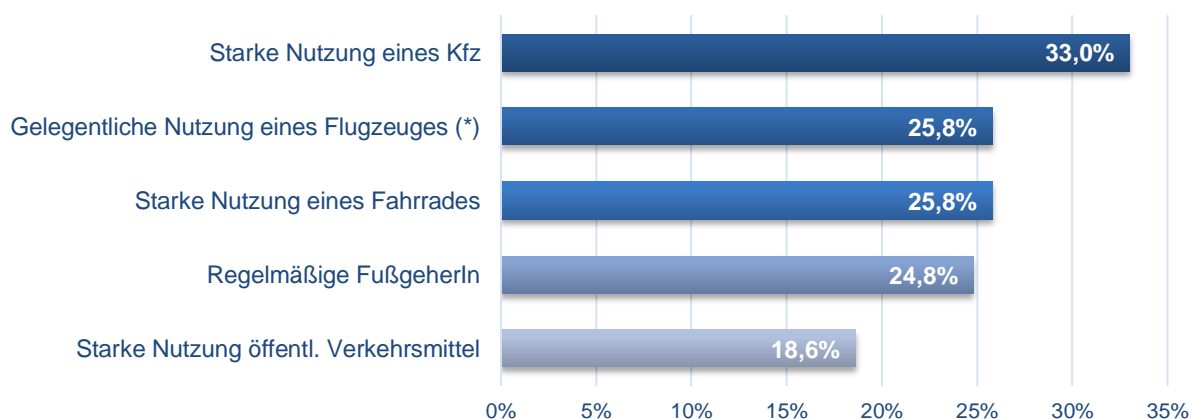

(\*) Aufgrund der geringen Fallzahlen von starken Nutzerinnen bzw. Nutzern von Flugzeugen wurde für diesen Vergleich die Gruppierung *Gelegentliche Nutzung* (entspricht der Antwortkategorie „Mehrmals pro Jahr“) gewählt.

<sup>16</sup> Anm.: Umfasst auch einen einmal im Jahr stattfindenden Urlaub, der mit dem Flugzeug als Transportmittel erreicht wird und bei dem im Regelfall zumindest zwei Flüge – ein Hin- und ein Rückflug – absolviert werden.

# Einschätzung der störendsten Lärmquelle in Innsbruck

## 1. Störendste Lärmquelle im Überblick

Fast 40% im befragten Kollektiv nehmen an, dass der Straßenverkehrslärm die Innsbruckerinnen und Innsbrucker insgesamt am meisten belästigt oder stört. Mit über 15 Prozentpunkten Abstand folgt der Flugverkehrslärm an zweiter Stelle, dicht gefolgt vom Baustellenlärm. Über 6% der Befragten machen keine Angaben zu dieser Frage:

**Abbildung 242: Einschätzung der störendsten Lärmquelle in Innsbruck in Prozent**

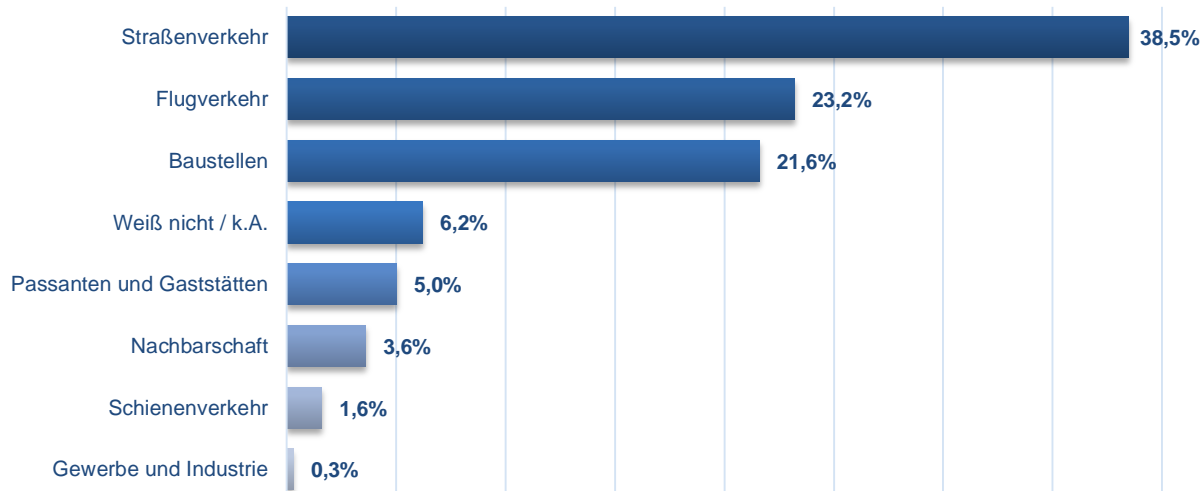

Die Lärmwirkungen ausgehend von Passanten und Gaststätten, Nachbarschaft, Schienenverkehr und Gewerbe und Industrie folgen mit sehr großem Abstand und werden nur von vergleichsweise wenigen bis sehr wenigen Befragten als störendste Lärmquelle in Innsbruck angenommen.

## 2. Störendste Lärmquelle und demographische Parameter

Männer, die Altersgruppe 60+ und Akademikerinnen und Akademiker sehen den Straßenverkehrslärm deutlicher als störendste Lärmquelle an als andere Subgruppen. Werden diese Attribute kombiniert, verstärkt sich dieser Effekt:

**Tabelle 183: Einschätzung der störendsten Lärmquelle in Innsbruck und demographische Parameter**

|                      |                 | Einschätzung störendste Lärmquelle in Innsbruck (*) |                      |                  |                               |                                   |                 |                    |
|----------------------|-----------------|-----------------------------------------------------|----------------------|------------------|-------------------------------|-----------------------------------|-----------------|--------------------|
|                      |                 | Straßen-<br>verkehr                                 | Schienen-<br>verkehr | Flug-<br>verkehr | Gewerbe<br>und In-<br>dustrie | Passanten<br>und Gast-<br>stätten | Bau-<br>stellen | Nach-<br>barschaft |
|                      |                 | Prozent                                             | Prozent              | Prozent          | Prozent                       | Prozent                           | Prozent         | Prozent            |
| <b>Geschlecht</b>    | weiblich        | 40,2%                                               | 1,2%                 | 23,3%            | 0,2%                          | 5,9%                              | 26,0%           | 3,2%               |
|                      | männlich        | 42,0%                                               | 2,2%                 | 26,3%            | 0,4%                          | 4,8%                              | 19,8%           | 4,6%               |
| <b>Altersgruppen</b> | 18 bis 40 Jahre | 36,1%                                               | 0,2%                 | 26,8%            | 0,2%                          | 5,4%                              | 27,3%           | 4,0%               |
|                      | 41 bis 60 Jahre | 43,7%                                               | 3,1%                 | 23,1%            | 0,0%                          | 6,1%                              | 19,3%           | 4,7%               |

|                        |               |       |      |       |      |      |       |      |
|------------------------|---------------|-------|------|-------|------|------|-------|------|
|                        | über 60 Jahre | 46,5% | 2,5% | 23,0% | 0,8% | 4,5% | 20,2% | 2,5% |
| <b>Bildungsschicht</b> | Primär        | 37,9% | 0,0% | 19,5% | 0,0% | 6,9% | 32,2% | 3,4% |
|                        | Sekundär      | 40,1% | 1,6% | 21,1% | 0,4% | 6,1% | 27,0% | 3,7% |
|                        | Tertiär       | 43,4% | 2,2% | 30,6% | 0,3% | 4,1% | 15,3% | 4,1% |

(\*) ohne Antwortkategorie w.n. / k.A.

Vor allem bei Angehörigen der tertiären Bildungsschicht und Männern steht der Flugverkehrslärm klar an der zweiten Stelle der störendsten Lärmquellen, während Frauen, die jüngste Altersgruppe der 18 bis 40-Jährigen und Befragte mit Pflichtschulabschluss den Lärm ausgehend von Baustellen am zweithäufigsten und damit noch vor dem Flugverkehrslärm angeben:

**Abbildung 243: Einschätzung der störendsten Lärmquelle und Bildungsschicht (gruppiert)**

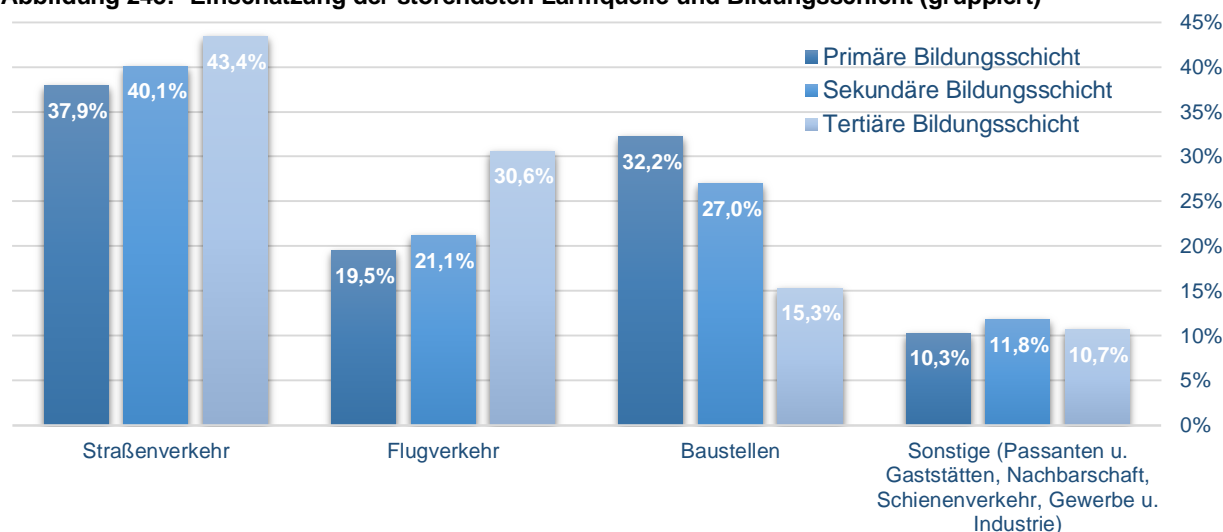

### 3. Störendste Lärmquelle und ausgewählte Parameter

Auch in der Zusammenschau mit diversen Subgruppen und Variablen wird der Straßenverkehr von den befragten Innsbruckerinnen und Innsbruckern durchgehend am häufigsten als störendste Lärmquelle genannt (eine Ausnahme bilden lediglich die Beziehungen zu den Belästigungsauswertungen – siehe dazu das Unterkapitel 5: *Störendste Lärmquelle und Lärmbelästigung* und die Gruppe der vom Flugverkehrslärm stark Belasteten – siehe das Unterkapitel 4: *Störendste Lärmquelle und Lärmbelastung*). Allerdings werden in bi- und multivariaten Analysen Fokussierungseffekte sichtbar:

Befragte, deren Wohnräume durch einen Innenhof oder eine lärmabgewandte Seite zum Teil verkehrslärmgeschützt sind, streuen in ihren Antworten auf die Frage nach der störendsten Lärmquelle in Innsbruck stärker und fokussieren etwas weniger auf Straßen- und Flugverkehrslärm.

Befragte, die gewöhnlich bei geöffnetem oder gekipptem Fenster schlafen, sehen häufiger Baustellen als störendste Lärmquelle an, als Personen, die bei geschlossenem Fenster schlafen.

Probandinnen und Probanden, die davon ausgehen, dass es in Innsbruck gleich laut / ruhig wie in anderen vergleichbaren Städten Österreichs ist, sehen mit über 45% im Straßenverkehr die störendste Lärmquelle, während Befragte, die Innsbruck für lauter oder ruhiger halten, den Flugverkehr häufi-

ger als störendste Lärmquelle ansehen, welcher bei diesen Gruppen rund 5 Prozentpunkte hinter dem Straßenverkehr zu liegen kommt.

Ähnliches gilt für die Gruppe derjenigen die (weitere) Maßnahmen zur Lärmreduktion in Innsbruck für notwendig halten: Diese Befragten fokussieren stärker auf den Straßenverkehrslärm als auf Flugverkehrs- und Baulärm:

**Tabelle 184: Einschätzung der störendsten Lärmquelle in Innsbruck und ausgewählte Parameter**

|                                                    |                        | Einschätzung störendste Lärmquelle in Innsbruck (*) |                      |                  |                               |                                   |                 |                    |
|----------------------------------------------------|------------------------|-----------------------------------------------------|----------------------|------------------|-------------------------------|-----------------------------------|-----------------|--------------------|
|                                                    |                        | Straßen-<br>verkehr                                 | Schienen-<br>verkehr | Flug-<br>verkehr | Gewerbe<br>und In-<br>dustrie | Passanten<br>und Gast-<br>stätten | Bau-<br>stellen | Nach-<br>barschaft |
|                                                    |                        | Prozent                                             | Prozent              | Prozent          | Prozent                       | Prozent                           | Prozent         | Prozent            |
| <b>Innenhof / Lärm-<br/>abgew. Seite</b>           | Ja                     | 40,5%                                               | 1,4%                 | 22,5%            | 0,3%                          | 6,6%                              | 24,3%           | 4,4%               |
|                                                    | Nein                   | 42,9%                                               | 2,1%                 | 30,5%            | 0,4%                          | 2,8%                              | 18,8%           | 2,5%               |
| <b>Nachtschlaf</b>                                 | Fenster geöffnet       | 40,6%                                               | 1,5%                 | 24,8%            | 0,1%                          | 5,2%                              | 24,4%           | 3,4%               |
|                                                    | Fenster geschlossen    | 42,5%                                               | 2,2%                 | 23,7%            | 1,1%                          | 6,5%                              | 18,3%           | 5,9%               |
| <b>Lautheit Inns-<br/>bruck im Ver-<br/>gleich</b> | Ruhiger                | 34,7%                                               | 1,1%                 | 29,2%            | 0,4%                          | 4,0%                              | 26,7%           | 4,0%               |
|                                                    | Gleich                 | 45,8%                                               | 2,1%                 | 20,5%            | 0,4%                          | 6,2%                              | 21,8%           | 3,1%               |
|                                                    | Lauter                 | 35,5%                                               | 1,2%                 | 30,1%            | 0,0%                          | 5,4%                              | 21,7%           | 6,0%               |
| <b>Maßnahmen zur<br/>Lärmreduktion</b>             | Ja                     | 42,5%                                               | 1,5%                 | 24,4%            | 0,4%                          | 4,9%                              | 22,7%           | 3,6%               |
|                                                    | Nein                   | 32,4%                                               | 2,4%                 | 29,4%            | 0,0%                          | 7,1%                              | 25,9%           | 2,9%               |
| <b>Lärmempfind-<br/>lichkeit</b>                   | Nicht lärmempfindlich  | 39,0%                                               | 1,2%                 | 22,5%            | 0,4%                          | 6,0%                              | 25,7%           | 5,2%               |
|                                                    | Durchschnittlich       | 42,2%                                               | 1,1%                 | 25,0%            | 0,0%                          | 4,5%                              | 23,5%           | 3,8%               |
|                                                    | Sehr lärmempfindlich   | 40,4%                                               | 4,3%                 | 27,3%            | 1,2%                          | 7,5%                              | 17,4%           | 1,9%               |
| <b>Ausgesetztheit<br/>Lärm gesamt</b>              | Gering exponiert       | 43,8%                                               | 1,3%                 | 24,0%            | 0,4%                          | 3,4%                              | 25,3%           | 1,7%               |
|                                                    | Mittelgradig exponiert | 40,2%                                               | 1,7%                 | 25,4%            | 0,2%                          | 6,5%                              | 22,0%           | 4,0%               |
|                                                    | Stark exponiert        | 40,0%                                               | 2,2%                 | 23,0%            | 0,7%                          | 3,7%                              | 23,7%           | 6,7%               |

(\*) ohne Antwortkategorie w.n. / k.A.

Die Variable Ausgesetztheit gegenüber Verkehrslärm insgesamt zeigt keine deutlichen Bezüge. Werden jedoch die einzelnen Lärmquellen der empfundenen Exponiertheit korreliert, korrespondieren die Antworten der Befragten stark mit den für sie persönlich dominantesten Quellen (siehe dazu das Unterkapitel 5. *Störendste Lärmquelle und Lärmbelästigung*).

## 4. Störendste Lärmquelle und Lärmbelastung

Von den einzelnen Lärmquellen geringbelastete Befragte glauben durchgehend am häufigsten, dass der Straßenverkehr die störendste Lärmquelle in Innsbruck ist. Stärker lärmbelastete Personen nähern sich den Mittelwerten an – mit einer Ausnahme: Stark fluglärmbelastete Innsbruckerinnen und Innsbrucker antworten entgegen dem Trend und sehen mit großem Abstand den Fluglärm als störendste Lärmquelle für Innsbruck insgesamt an:

**Abbildung 244: Einschätzung der störendsten Lärmquelle und Lärmbelastung nach Quelle im Extremgruppenvergleich der Starkbelasteten**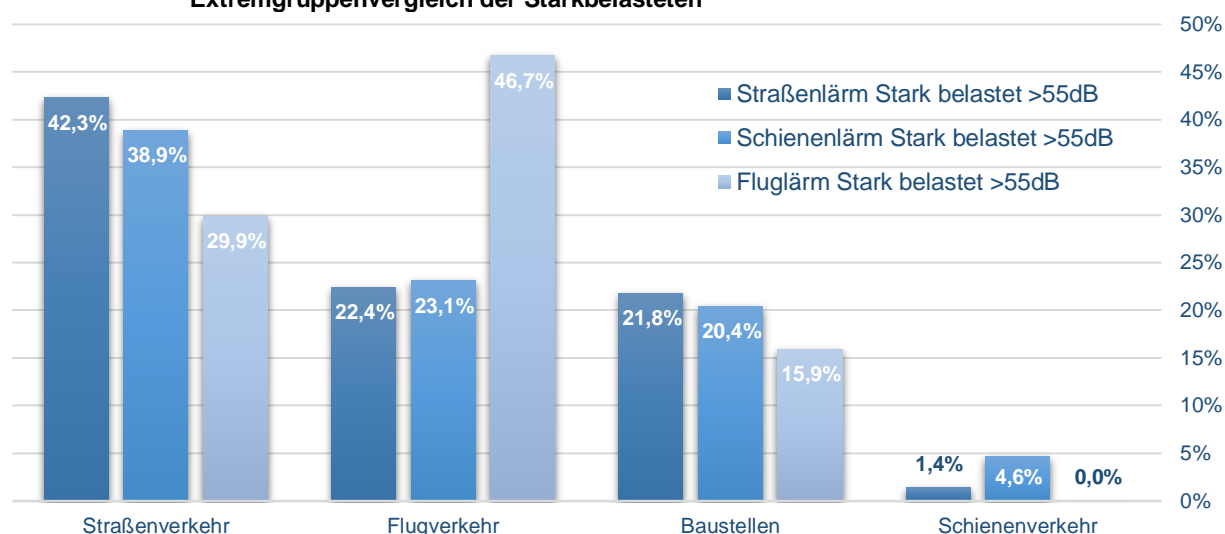

Eine weitere Auffälligkeit zeigt sich in diesem Extremgruppenvergleich der vom gegebenen Verkehrslärm Starkbelasteten: Während die stark Fluglärmbelasteten von der eigenen Situation in ihrem Wohnumfeld auf die Gesamtheit Innsbrucks schließen, tun dies die stark vom Schienenverkehrslärm Belasteten nicht. Zwar nehmen die stark Schienenverkehrslärmbelasteten zu einem größeren Teil als die Gesamtstichprobe an, dass der Schienenverkehr die störendste Lärmquelle sei (4,6%), der weit überwiegende Teil der stark Schienenverkehrslärmbelasteten liegt mit seinem Antwortverhalten jedoch ziemlich exakt im Mittel der Antworten der insgesamt Befragten. In Zusammenschau mit den Auswertungen zu den Belästigungsreaktionen (siehe das Kapitel *Belästigung / Störung durch Lärm*) lässt sich die Aussage erhärten, dass ein Großteil der befragten Innsbruckerinnen und Innsbrucker, darunter auch die vom Schienenverkehrslärm stark belasteten Befragten, den Schienenverkehrslärm im Vergleich zum Straßen- und Flugverkehrslärm, sowie dem Lärm ausgehend von Baustellen als weniger störend / belästigend einstuft.

**Tabelle 185: Einschätzung der störendsten Lärmquelle in Innsbruck und Lärmbelastung nach Quelle**

|                     |                      | Einschätzung störendste Lärmquelle in Innsbruck (*) |                 |             |                       |                           |            |               |
|---------------------|----------------------|-----------------------------------------------------|-----------------|-------------|-----------------------|---------------------------|------------|---------------|
|                     |                      | Straßenverkehr                                      | Schienenverkehr | Flugverkehr | Gewerbe und Industrie | Passanten und Gaststätten | Baustellen | Nachbarschaft |
|                     |                      | Prozent                                             | Prozent         | Prozent     | Prozent               | Prozent                   | Prozent    | Prozent       |
| <b>Straßenlärm</b>  | Stark belastet >55dB | 42,3%                                               | 1,4%            | 22,4%       | 0,4%                  | 7,4%                      | 21,8%      | 4,3%          |
|                     | Mittelgradig 45-55dB | 36,2%                                               | 2,1%            | 28,5%       | 0,3%                  | 4,0%                      | 25,3%      | 3,7%          |
|                     | Geringbelastet <45dB | 52,9%                                               | 1,0%            | 22,1%       | 0,0%                  | 1,0%                      | 21,2%      | 1,9%          |
| <b>Schienenlärm</b> | Stark belastet >55dB | 38,9%                                               | 4,6%            | 23,1%       | 0,9%                  | 6,5%                      | 20,4%      | 5,6%          |
|                     | Mittelgradig 45-55dB | 39,9%                                               | 1,0%            | 25,5%       | 0,3%                  | 6,0%                      | 24,2%      | 3,0%          |
|                     | Geringbelastet <45dB | 42,1%                                               | 1,4%            | 24,6%       | 0,2%                  | 4,8%                      | 23,0%      | 3,9%          |
| <b>Fluglärm</b>     | Stark belastet >55dB | 29,9%                                               | 0,0%            | 46,7%       | 0,9%                  | 0,9%                      | 15,9%      | 5,6%          |
|                     | Mittelgradig 45-55dB | 37,5%                                               | 1,7%            | 26,9%       | 0,3%                  | 8,6%                      | 22,1%      | 2,9%          |
|                     | Geringbelastet <45dB | 45,8%                                               | 2,0%            | 18,6%       | 0,2%                  | 4,1%                      | 25,2%      | 4,1%          |

(\*) ohne Antwortkategorie w.n. / k.A.

## 5. Störendste Lärmquelle und Lärmbelästigung

Aus den Auswertungen ist ersichtlich, dass von einer bestimmten Lärmquelle stark belästigte Befragte dazu neigen, dieses Gefühl der persönlichen Störung auf die Gesamtheit Innsbrucks zu übertragen. Eine Abstraktion von der persönlichen Belästigung auf die insgesamt störendste Lärmquelle gelingt nicht (gänzlich), oder wird bewusst nicht angestrebt.

Die Extremgruppen der Starkbelästigten schätzen die sie selbst stark belästigende Quelle überproportional häufig als störendste Lärmquelle für Gesamtinnsbruck ein. Das gilt nicht nur für die Verkehrs-lärmquellen, sondern besonders ausgeprägt auch für die nicht-verkehrsinduzierten Lärmquellen:

**Abbildung 245: Einschätzung der störendsten Lärmquelle in Innsbruck und Lärmbelästigung nach Quelle im Extremgruppenvergleich der Starkbelästigten**

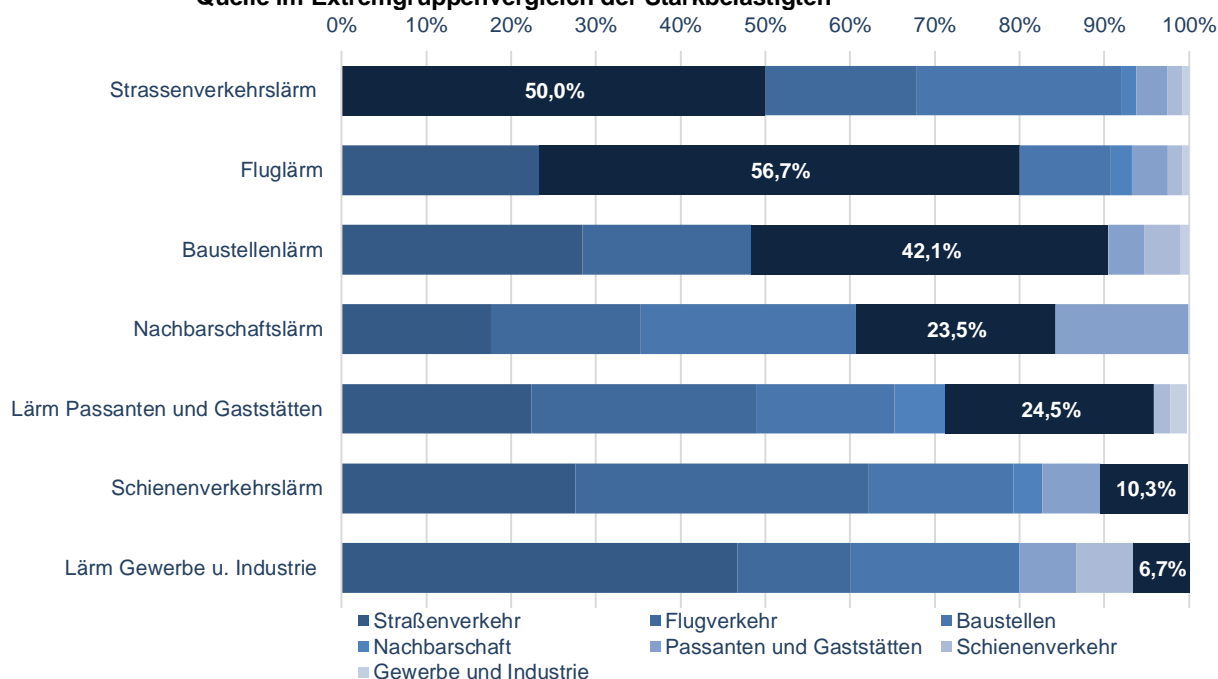

- Der Straßenverkehr als störendste Lärmquelle wird von den vom Straßenverkehr stark belästigten Befragten um rund 30% im Vergleich zum Gesamtkollektiv überschätzt.
- Der Fluglärm von den stark Fluglärm-belästigten um das 1,5-Fache.
- Der Baulärm von stark Baulärm-belästigten um das Doppelte.
- Der Lärm von Passanten und Gaststätten von stark von demselben Belästigten um das Vierfache.
- Der Schienenverkehrslärm von den stark Schienenverkehrslärm-belästigten um das 5,5-Fache.
- Der Nachbarschaftslärm von stark Nachbarschaftslärm-belästigten ebenfalls um das 5,5-Fache.
- Und der Lärm von Gewerbe und Industrie von stark von demselben Belästigten um das 22-Fache.

**Tabelle 186:      Einschätzung der störendsten Lärmquelle in Innsbruck u. Lärmbelastigung nach Quelle**

|                        |                        | Einschätzung störendste Lärmquelle in Innsbruck (*) |                      |                  |                               |                                   |                 |                    |
|------------------------|------------------------|-----------------------------------------------------|----------------------|------------------|-------------------------------|-----------------------------------|-----------------|--------------------|
|                        |                        | Straßen-<br>verkehr                                 | Schienen-<br>verkehr | Flug-<br>verkehr | Gewerbe<br>und In-<br>dustrie | Passanten<br>und Gast-<br>stätten | Bau-<br>stellen | Nach-<br>barschaft |
|                        |                        | Prozent                                             | Prozent              | Prozent          | Prozent                       | Prozent                           | Prozent         | Prozent            |
| <b>Belästigung im</b>  | Gering belästigt       | 41,3%                                               | 0,9%                 | 25,3%            | 0,2%                          | 4,2%                              | 24,7%           | 3,4%               |
| <b>Schlaf Lärm</b>     | Mittelgradig belästigt | 41,8%                                               | 3,6%                 | 23,3%            | 0,4%                          | 5,6%                              | 21,7%           | 3,6%               |
| <b>gesamt</b>          | Stark belästigt        | 37,2%                                               | 1,3%                 | 24,4%            | 1,3%                          | 14,1%                             | 14,1%           | 7,7%               |
| <b>Belästigung</b>     | Gering belästigt       | 43,0%                                               | 1,2%                 | 23,7%            | 0,3%                          | 4,4%                              | 24,9%           | 2,6%               |
| <b>Lärm gesamt</b>     | Mittelgradig belästigt | 40,4%                                               | 1,8%                 | 25,5%            | 0,2%                          | 6,1%                              | 21,8%           | 4,2%               |
|                        | Stark belästigt        | 38,3%                                               | 2,5%                 | 24,2%            | 0,8%                          | 5,0%                              | 23,3%           | 5,8%               |
| <b>Belästigung</b>     | Gering belästigt       | 45,4%                                               | 1,7%                 | 16,1%            | 0,2%                          | 5,4%                              | 26,9%           | 4,3%               |
| <b>Fluglärm</b>        | Mittelgradig belästigt | 41,4%                                               | 1,6%                 | 25,1%            | 0,3%                          | 5,8%                              | 22,3%           | 3,7%               |
|                        | Stark belästigt        | 23,3%                                               | 1,7%                 | 56,7%            | 0,8%                          | 4,2%                              | 10,8%           | 2,5%               |
| <b>Belästigung</b>     | Gering belästigt       | 36,6%                                               | 1,0%                 | 28,1%            | 0,2%                          | 5,3%                              | 24,5%           | 4,3%               |
| <b>Strassenver-</b>    | Mittelgradig belästigt | 44,3%                                               | 2,5%                 | 22,2%            | 0,3%                          | 6,1%                              | 20,8%           | 3,9%               |
| <b>kehrslärm</b>       | Stark belästigt        | 50,0%                                               | 1,8%                 | 17,9%            | 0,9%                          | 3,6%                              | 24,1%           | 1,8%               |
| <b>Belästigung</b>     | Gering belästigt       | 42,8%                                               | 1,5%                 | 27,1%            | 0,3%                          | 4,4%                              | 19,4%           | 4,5%               |
| <b>Baustellenlärm</b>  | Mittelgradig belästigt | 41,7%                                               | 1,2%                 | 20,2%            | 0,0%                          | 8,3%                              | 25,0%           | 3,6%               |
|                        | Stark belästigt        | 28,4%                                               | 4,2%                 | 20,0%            | 1,1%                          | 4,2%                              | 42,1%           | 0,0%               |
| <b>Belästigung</b>     | Gering belästigt       | 42,7%                                               | 1,6%                 | 25,0%            | 0,4%                          | 4,4%                              | 23,9%           | 1,9%               |
| <b>Nachbarschafts-</b> | Mittelgradig belästigt | 41,3%                                               | 2,1%                 | 25,5%            | 0,0%                          | 6,0%                              | 20,0%           | 5,1%               |
| <b>lärm</b>            | Stark belästigt        | 17,6%                                               | 0,0%                 | 17,6%            | 0,0%                          | 15,7%                             | 25,5%           | 23,5%              |
| <b>Belästigung</b>     | Gering belästigt       | 42,4%                                               | 1,6%                 | 26,0%            | 0,1%                          | 3,2%                              | 23,6%           | 3,0%               |
| <b>Lärm Passanten</b>  | Mittelgradig belästigt | 41,0%                                               | 1,8%                 | 20,3%            | 0,4%                          | 7,9%                              | 22,9%           | 5,7%               |
| <b>und Gaststätten</b> | Stark belästigt        | 22,4%                                               | 2,0%                 | 26,5%            | 2,0%                          | 24,5%                             | 16,3%           | 6,1%               |
| <b>Belästigung</b>     | Gering belästigt       | 41,7%                                               | 0,9%                 | 24,2%            | 0,3%                          | 5,0%                              | 24,1%           | 3,8%               |
| <b>Schienenver-</b>    | Mittelgradig belästigt | 40,3%                                               | 3,9%                 | 25,3%            | 0,6%                          | 7,1%                              | 18,8%           | 3,9%               |
| <b>kehrslärm</b>       | Stark belästigt        | 27,6%                                               | 10,3%                | 34,5%            | 0,0%                          | 6,9%                              | 17,2%           | 3,4%               |
| <b>Belästigung</b>     | Gering belästigt       | 41,0%                                               | 1,5%                 | 24,9%            | 0,1%                          | 5,3%                              | 23,5%           | 3,8%               |
| <b>Lärm Gewerbe u.</b> | Mittelgradig belästigt | 40,8%                                               | 2,6%                 | 25,0%            | 1,3%                          | 6,6%                              | 18,4%           | 5,3%               |
| <b>Industrie</b>       | Stark belästigt        | 46,7%                                               | 6,7%                 | 13,3%            | 6,7%                          | 6,7%                              | 20,0%           | 0,0%               |

(\*) ohne Antwortkategorie w.n. / k.A.



# Sinnhaftigkeit von Maßnahmen zur Lärmreduktion in Innsbruck

## 1. Überblick Sinnhaftigkeit von Lärmreduktionsmaßnahmen

Mehr als zwei Drittel aller Befragten sind der Meinung, in Innsbruck sollten (weitere) Maßnahmen zur Lärmreduktion getroffen werden. Über 14% machen keine Angaben und knapp 19% halten (weitere) Maßnahmen zur Lärmreduktion nicht für zielführend:

**Abbildung 246: Sinnhaftigkeit (weiterer) Maßnahmen zur Lärmreduktion in Prozent**

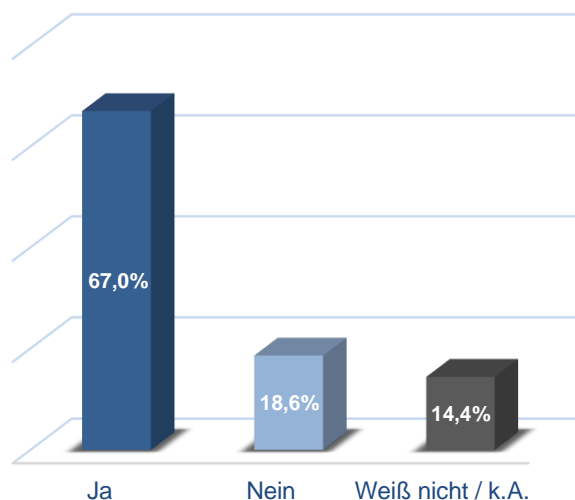

Werden nur diejenigen Befragten herangezogen, die diese Frage mit einem Ja oder einem Nein beantwortet haben, sprechen sich 78% für (weitere) Lärmreduktionsmaßnahmen aus, knapp 22% dagegen:

**Tabelle 187: Sinnhaftigkeit (weiterer) Maßnahmen zur Lärmreduktion in Innsbruck (ohne w.n. / k.A.)**

|         |                  | Häufigkeit | Gültige Prozente | Kumulierte Prozente |
|---------|------------------|------------|------------------|---------------------|
|         | Ja               | 691        | 78,3             | 78,3                |
| Gültig  | Nein             | 192        | 21,7             | 100,0               |
|         | Gesamt           | 883        | 100,0            |                     |
| Fehlend | Weiß nicht/ k.A. | 148        |                  |                     |
| Gesamt  |                  | 1031       |                  |                     |

## 2. Sinnhaftigkeit von Lärmreduktionsmaßnahmen und ausgewählte Parameter

Frauen halten (weitere) Maßnahmen eher für sinnvoll als Männer.

Die jüngste Altersgruppe der Befragten sieht eine geringere Notwendigkeit für Lärmreduktionsmaßnahmen als die beiden anderen Altersgruppen.

Je höher der höchste erreichte Bildungsabschluss, desto eher werden Maßnahmen zur Lärmreduktion von den befragten Innsbruckerinnen und Innsbruckern befürwortet. Die Unterschiede im Antwortver-

halten sind wiederum vor allem zwischen Personen mit Pflichtschulabschluss und Akademikerinnen und Akademikern sehr ausgeprägt.

Probandinnen und Probanden, die Innsbruck im Vergleich mit anderen österreichischen Städten für lauter halten, sprechen sich häufiger für (weitere) Maßnahmen zur Lärmbekämpfung aus, als Befragte die Innsbruck insgesamt für ruhiger als andere vergleichbare Städte ansehen:

**Abbildung 247: Sinnhaftigkeit von Maßnahmen zur Lärmreduktion und Lärmniveau von Innsbruck im Städtevergleich**

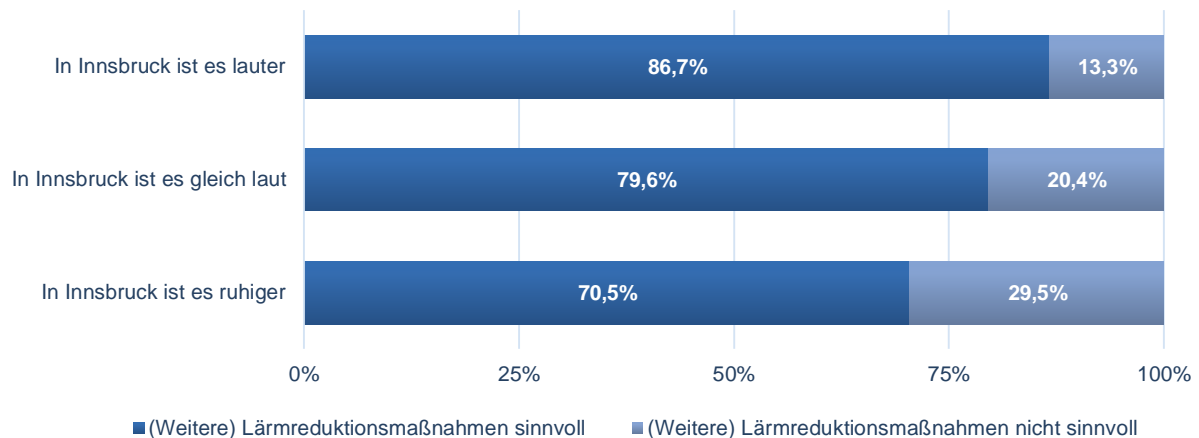

Befragte, welche ihre Lebensbedingungen als weniger gut oder durchschnittlich einstufen, sind weit häufiger für zusätzliche Maßnahmen als Personen, die ihre Wohn- und Lebensbedingungen als sehr gut beurteilen.

In Zusammenschau mit dem Gefühl der eigenen Ausgesetzttheit gegenüber Lärm und der Einschätzung der persönlichen Lärmempfindlichkeit zeigt sich sowohl in den Extremgruppen- als auch in den Mittelwertvergleichen ein gewisser Schwellenwert: Eher geringfügig lärmempfindliche Befragte in den ersten 4 Antwortkategorien zeigen nur einen sehr moderaten Anstieg in der Zustimmung zur Notwendigkeit (weiterer) Lärmreduktionsmaßnahmen. Ab einem mittleren Niveau der eigenen Lärmempfindlichkeit, respektive dem Gefühl der Ausgesetzttheit gegenüber Lärm, steigt die Befürwortung weiterer Maßnahmen stark an und bleibt auch bei den sich als stark lärmempfindlich / lärmexponiert einstufenden Befragten nahezu gleich auf demselben hohen Niveau:

**Abbildung 248: Sinnhaftigkeit von Maßnahmen zur Lärmreduktion und Lärmempfindlichkeit im Mittelwertvergleich**

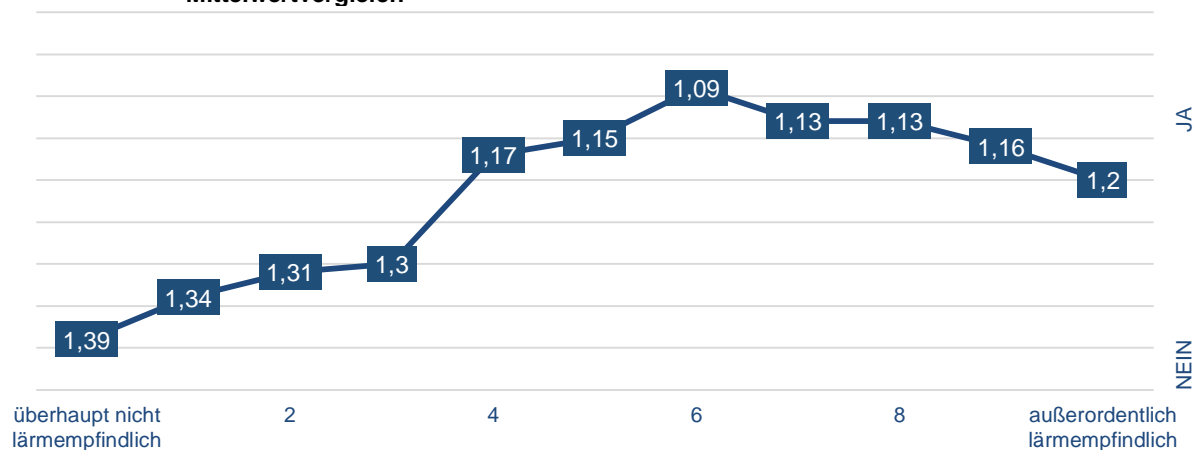

**Tabelle 188: Sinnhaftigkeit von Maßnahmen zur Lärmreduktion und ausgewählte Parameter**

|                                                                   |                           | <b>Notwendigkeit (weiterer) Maßnahmen zur Lärmreduktion (*)</b> |            |             |            |
|-------------------------------------------------------------------|---------------------------|-----------------------------------------------------------------|------------|-------------|------------|
|                                                                   |                           | <b>Ja</b>                                                       |            | <b>Nein</b> |            |
|                                                                   |                           | Anzahl                                                          | Zeilen (%) | Anzahl      | Zeilen (%) |
| <b>Geschlecht</b>                                                 | weiblich                  | 372                                                             | 81,0%      | 87          | 19,0%      |
|                                                                   | männlich                  | 319                                                             | 75,2%      | 105         | 24,8%      |
| <b>Altersgruppen</b>                                              | 18 bis 40 Jahre           | 270                                                             | 74,2%      | 94          | 25,8%      |
|                                                                   | 41 bis 60 Jahre           | 228                                                             | 82,9%      | 47          | 17,1%      |
|                                                                   | über 60 Jahre             | 193                                                             | 79,1%      | 51          | 20,9%      |
| <b>Bildungsschicht</b>                                            | Primärer Schulabschluss   | 48                                                              | 64,0%      | 27          | 36,0%      |
|                                                                   | Sekundärer Schulabschluss | 353                                                             | 76,4%      | 109         | 23,6%      |
|                                                                   | Tertiärer Schulabschluss  | 289                                                             | 84,3%      | 54          | 15,7%      |
| <b>Nachtschlaf</b>                                                | Fenster geöffnet/gekippt  | 542                                                             | 77,2%      | 160         | 22,8%      |
|                                                                   | Fenster geschlossen       | 145                                                             | 83,3%      | 29          | 16,7%      |
| <b>Lebensbedingungen<br/>(Summenscore)</b>                        | Nicht gut                 | 5                                                               | 100,0%     | 0           | 0,0%       |
|                                                                   | Durchschnittlich          | 483                                                             | 82,4%      | 103         | 17,6%      |
|                                                                   | Sehr gut                  | 203                                                             | 69,5%      | 89          | 30,5%      |
| <b>Lautheit Innsbruck im<br/>Vergleich zu anderen<br/>Städten</b> | Ruhiger                   | 172                                                             | 70,5%      | 72          | 29,5%      |
|                                                                   | Gleich                    | 367                                                             | 79,6%      | 94          | 20,4%      |
|                                                                   | Lauter                    | 144                                                             | 86,7%      | 22          | 13,3%      |
| <b>Lärmempfindlichkeit</b>                                        | Nicht lärmempfindlich     | 152                                                             | 66,1%      | 78          | 33,9%      |
|                                                                   | Durchschnittlich          | 405                                                             | 82,0%      | 89          | 18,0%      |
|                                                                   | Sehr lärmempfindlich      | 134                                                             | 84,3%      | 25          | 15,7%      |
| <b>Ausgesetzttheit<br/>Lärm gesamt</b>                            | Gering exponiert          | 141                                                             | 66,2%      | 72          | 33,8%      |
|                                                                   | Mittelgradig exponiert    | 431                                                             | 80,3%      | 106         | 19,7%      |
|                                                                   | Stark exponiert           | 119                                                             | 89,5%      | 14          | 10,5%      |

(\*) ohne Antwortkategorie w.n. / k.A.

### 3. Sinnhaftigkeit von Lärmreduktionsmaßnahmen und Lärmbelastung

Die gegebene Lärmbelastung im Wohnumfeld der Befragten ist nicht bzw. nur in sehr geringfügigem Ausmaß ausschlaggebend für den Grad der Zustimmung zu (weiteren) Lärmreduktionsmaßnahmen:

**Tabelle 189: Sinnhaftigkeit von Maßnahmen zur Lärmreduktion und Lärmbelastung nach Quelle**

|                        |                               | <b>Notwendigkeit (weiterer) Maßnahmen zur Lärmreduktion (*)</b> |            |             |            |
|------------------------|-------------------------------|-----------------------------------------------------------------|------------|-------------|------------|
|                        |                               | <b>Ja</b>                                                       |            | <b>Nein</b> |            |
|                        |                               | Anzahl                                                          | Zeilen (%) | Anzahl      | Zeilen (%) |
| <b>Straßenlärm 24h</b> | Stark belastet >55dB          | 364                                                             | 79,8%      | 92          | 20,2%      |
|                        | Mittelgradig belastet 45-55dB | 258                                                             | 76,8%      | 78          | 23,2%      |

|                         |                               |     |       |     |       |
|-------------------------|-------------------------------|-----|-------|-----|-------|
| <b>Schienenlärm 24h</b> | Gering belastet <45dB         | 69  | 75,8% | 22  | 24,2% |
|                         | Stark belastet >55dB          | 85  | 82,5% | 18  | 17,5% |
|                         | Mittelgradig belastet 45-55dB | 221 | 79,8% | 56  | 20,2% |
|                         | Gering belastet <45dB         | 385 | 76,5% | 118 | 23,5% |
| <b>Fluglärm 24h</b>     | Stark belastet >55dB          | 79  | 78,2% | 22  | 21,8% |
|                         | Mittelgradig belastet 45-55dB | 259 | 81,4% | 59  | 18,6% |
|                         | Gering belastet <45dB         | 353 | 76,1% | 111 | 23,9% |
|                         |                               |     |       |     |       |

(\*) ohne Antwortkategorie w.n. / k.A.

#### 4. Sinnhaftigkeit von Lärmreduktionsmaßnahmen und Lärmbelästigung

Im Gegensatz zur vergleichsweise geringen Beziehung zwischen der gegebenen Lärmbelastung nach Quelle im Wohnumfeld der Befragten und dem Ausmaß der Zustimmung zur (weiteren) Maßnahmen zur Lärmreduktion in Innsbruck, zeigt sich ein ausgeprägter Bezug zur Einschätzung der eigenen Belästigung durch Lärm.

Die Befürwortung (weiterer) Maßnahmen zur Lärmreduktion in Innsbruck unterscheidet sich deutlich je nach Belästigungsgrad der Befragten. Die vom Lärm insgesamt nur gering belästigten Befragten, erachten zu 65% weitere Maßnahmen für notwendig, dieser Grad der Zustimmung steigt bei den Starkbelästigten auf 90%.

Dabei zeigt sich auch erneut eine erhöhte Sensibilität auf Lärmbelästigung im Schlaf:

**Abbildung 249: Sinnhaftigkeit von Maßnahmen zur Lärmreduktion und Lärmbelästigung gesamt und im Schlaf (gruppiert) im Vergleich**

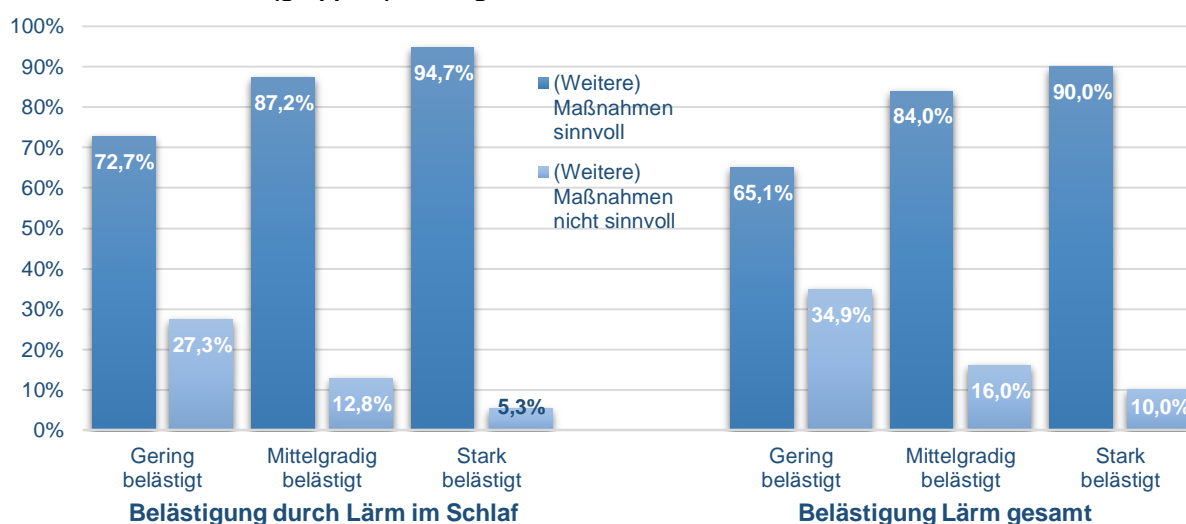

(\*) ohne Antwortkategorie w.n. / k.A.

Die deutlich erhöhte Zustimmung der Starkbelästigten zu Lärmreduktionsmaßnahmen gestaltet sich unabhängig von der Art und Quelle der Lärmbelästigung. Drei Viertel der Befragten, die sich von den einzelnen Lärmquellen nur gering belästigt / gestört fühlen, sprechen sich im Mittel für (weitere) Lärm-

reduktionsmaßnahmen in Innsbruck aus. Dieser Anteil steigt bei sich stark belästigt Fühlenden auf im Durchschnitt 91%:

**Abbildung 250: Sinnhaftigkeit von Maßnahmen zur Lärmreduktion und Mittelwerte der Lärmbelästigung (alle Quellen) in Prozent**

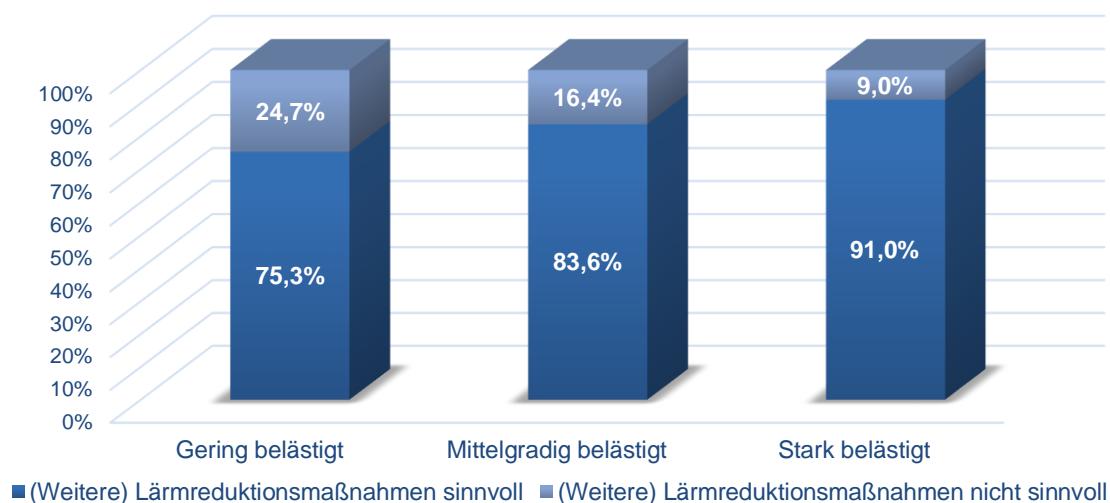

(\*) ohne Antwortkategorie w.n. / k.A.

**Tabelle 190: Sinnhaftigkeit von Maßnahmen zur Lärmreduktion und Lärmbelästigung nach Quelle**

|                                        |                        | Notwendigkeit (weiterer) Maßnahmen zur Lärmreduktion (*) |            |        |            |
|----------------------------------------|------------------------|----------------------------------------------------------|------------|--------|------------|
|                                        |                        | Ja                                                       |            | Nein   |            |
|                                        |                        | Anzahl                                                   | Zeilen (%) | Anzahl | Zeilen (%) |
| <b>Belästigung im Schlaf</b>           | Gering belästigt       | 423                                                      | 72,7%      | 159    | 27,3%      |
|                                        | Mittelgradig belästigt | 197                                                      | 87,2%      | 29     | 12,8%      |
|                                        | Stark belästigt        | 71                                                       | 94,7%      | 4      | 5,3%       |
| <b>Belästigung Lärm gesamt</b>         | Gering belästigt       | 200                                                      | 65,1%      | 107    | 34,9%      |
|                                        | Mittelgradig belästigt | 383                                                      | 84,0%      | 73     | 16,0%      |
|                                        | Stark belästigt        | 108                                                      | 90,0%      | 12     | 10,0%      |
| <b>Belästigung Fluglärm</b>            | Gering belästigt       | 291                                                      | 70,3%      | 123    | 29,7%      |
|                                        | Mittelgradig belästigt | 294                                                      | 83,1%      | 60     | 16,9%      |
|                                        | Stark belästigt        | 106                                                      | 92,2%      | 9      | 7,8%       |
| <b>Belästigung Straßenverkehrslärm</b> | Gering belästigt       | 322                                                      | 70,9%      | 132    | 29,1%      |
|                                        | Mittelgradig belästigt | 268                                                      | 84,3%      | 50     | 15,7%      |
|                                        | Stark belästigt        | 101                                                      | 91,0%      | 10     | 9,0%       |
| <b>Belästigung Baustellenlärm</b>      | Gering belästigt       | 435                                                      | 77,1%      | 129    | 22,9%      |
|                                        | Mittelgradig belästigt | 179                                                      | 79,2%      | 47     | 20,8%      |
|                                        | Stark belästigt        | 76                                                       | 82,6%      | 16     | 17,4%      |
| <b>Belästigung Nachbarschaftslärm</b>  | Gering belästigt       | 467                                                      | 75,4%      | 152    | 24,6%      |
|                                        | Mittelgradig belästigt | 181                                                      | 83,4%      | 36     | 16,6%      |
|                                        | Stark belästigt        | 43                                                       | 91,5%      | 4      | 8,5%       |
| <b>Belästigung</b>                     | Gering belästigt       | 476                                                      | 75,8%      | 152    | 24,2%      |

|                                |                        |     |        |     |       |
|--------------------------------|------------------------|-----|--------|-----|-------|
| <b>Lärm von Passanten und</b>  | Mittelgradig belästigt | 171 | 82,6%  | 36  | 17,4% |
| <b>Gaststätten</b>             | Stark belästigt        | 44  | 91,7%  | 4   | 8,3%  |
|                                | Gering belästigt       | 544 | 76,5%  | 167 | 23,5% |
| <b>Belästigung</b>             | Mittelgradig belästigt | 121 | 83,4%  | 24  | 16,6% |
| <b>Schienenverkehrslärm</b>    | Stark belästigt        | 26  | 96,3%  | 1   | 3,7%  |
|                                | Gering belästigt       | 554 | 76,7%  | 168 | 23,3% |
| <b>Belästigung</b>             | Mittelgradig belästigt | 109 | 84,5%  | 20  | 15,5% |
| <b>Erschütterungen</b>         | Stark belästigt        | 28  | 87,5%  | 4   | 12,5% |
|                                | Gering belästigt       | 615 | 77,2%  | 182 | 22,8% |
| <b>Lärm aus Gewerbe u. In-</b> | Mittelgradig belästigt | 62  | 86,1%  | 10  | 13,9% |
| <b>dustrie</b>                 | Stark belästigt        | 14  | 100,0% | 0   | 0,0%  |
|                                | Gering belästigt       | 623 | 77,5%  | 181 | 22,5% |
| <b>Belästigung</b>             | Mittelgradig belästigt | 49  | 86,0%  | 8   | 14,0% |
| <b>Autobahnlärm</b>            | Stark belästigt        | 19  | 86,4%  | 3   | 13,6% |

(\*) ohne Antwortkategorie w.n. / k.A.

## 5. Einzelmaßnahmen zur Lärmreduktion in Innsbruck

Die 691 befragten Innsbruckerinnen und Innsbrucker (67% des befragten Kollektivs), welche (weitere) Maßnahmen zur Lärmreduktion in der Stadt für sinnvoll halten, wurden weitergehend nach ihrer Meinung zu einzelnen Maßnahmenbereichen befragt:

Die Schaffung, der Schutz und der Erhalt lärmarmer Bereiche in der Stadt Innsbruck wird von den Befragten am häufigsten als sinnvolle Maßnahme befürwortet (siehe dazu vor allem auch das Unterkapitel *Ruhige Gebiete* im Kapitel *Gesamtlärbetrachtung Innsbruck*). Generell werden vor allem Förderungsmaßnahmen für sinnvoll erachtet, die von deutlich über 80% derjenigen Befragten, die Maßnahmen zur Lärmreduktion für zweckmäßig halten, angeregt werden:

**Abbildung 251: Befürwortung von Einzelmaßnahmen zur Lärmreduktion in Innsbruck in Prozent**

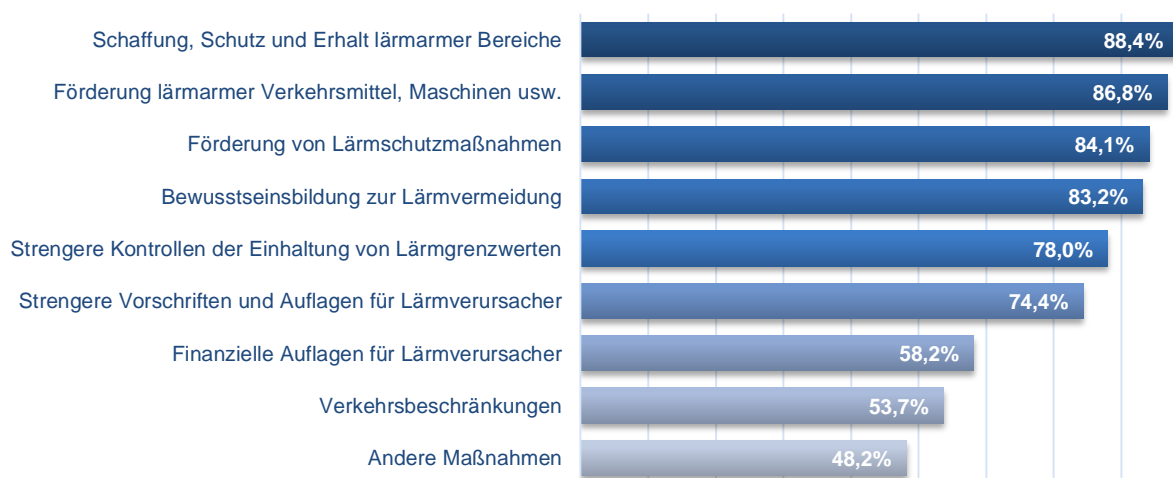

Die Bewusstseinsbildung zur Lärmvermeidung wird ebenfalls von über 80% aus dieser Subgruppe für wichtig erachtet, erhält aber geringere Zustimmungswerte als die Förderungsmaßnahmen auf den ersten drei Plätzen. Strengere Kontrollen der Einhaltung von Lärmgrenzwerten, sowie strengere Vorschriften und Auflagen für Lärmverursacherinnen und –Verursacher werden von rund drei Vierteln gutgeheißen. Finanzielle Auflagen für Lärmverursacherinnen und –Verursacher, sowie Verkehrsbeschränkungen hält knapp mehr als die Hälfte der Maßnahmenbefürworterinnen und –Befürworter für sinnvoll. Bezogen auf das Gesamtkollektiv aller 1031 befragten Innsbruckerinnen und Innsbrucker befürwortet über ein Drittel auch Verkehrsbeschränkungen und finanzielle Auflagen:

**Tabelle 191: Sinnhaftigkeit Einzelmaßnahmen zur Lärmreduktion in Innsbruck**

|                                                                |                   | Anzahl N (*) | Prozent N (*) | Prozent Gesamtanzahl |
|----------------------------------------------------------------|-------------------|--------------|---------------|----------------------|
| <b>Förderung lärmarmen Verkehrsmittel, Maschinen usw.</b>      | Ja                | 600          | 86,8%         | 58,2%                |
|                                                                | Nein              | 81           | 11,7%         | 7,9%                 |
|                                                                | Weiß nicht / k.A. | 10           | 1,4%          | 1,0%                 |
| <b>Strengere Vorschriften und Auflagen für Lärmverursacher</b> | Ja                | 514          | 74,4%         | 49,9%                |
|                                                                | Nein              | 170          | 24,6%         | 16,5%                |
|                                                                | Weiß nicht/ k.A.  | 7            | 1,0%          | 0,7%                 |
| <b>Förderung von Lärmschutzmaßnahmen</b>                       | Ja                | 581          | 84,1%         | 56,4%                |
|                                                                | Nein              | 97           | 14,0%         | 9,4%                 |
|                                                                | Weiß nicht/ k.A.  | 13           | 1,9%          | 1,3%                 |
| <b>Strengere Kontrollen der Einhaltung von Lärmgrenzwerten</b> | Ja                | 539          | 78,0%         | 52,3%                |
|                                                                | Nein              | 135          | 19,5%         | 13,1%                |
|                                                                | Weiß nicht/ k.A.  | 17           | 2,5%          | 1,6%                 |
| <b>Bewusstseinsbildung zur Lärmvermeidung</b>                  | Ja                | 575          | 83,2%         | 55,8%                |
|                                                                | Nein              | 107          | 15,5%         | 10,4%                |
|                                                                | Weiß nicht/ k.A.  | 9            | 1,3%          | 0,9%                 |
| <b>Verkehrsbeschränkungen</b>                                  | Ja                | 371          | 53,7%         | 36,0%                |
|                                                                | Nein              | 303          | 43,8%         | 29,4%                |
|                                                                | Weiß nicht/ k.A.  | 17           | 2,5%          | 1,6%                 |
| <b>Finanzielle Auflagen für Lärmverursacher</b>                | Ja                | 402          | 58,2%         | 39,0%                |
|                                                                | Nein              | 277          | 40,1%         | 26,9%                |
|                                                                | Weiß nicht/ k.A.  | 12           | 1,7%          | 1,2%                 |
| <b>Schaffung, Schutz und Erhalt lärmarmen Bereiche</b>         | Ja                | 611          | 88,4%         | 59,3%                |
|                                                                | Nein              | 65           | 9,4%          | 6,3%                 |
|                                                                | Weiß nicht/ k.A.  | 15           | 2,2%          | 1,5%                 |
| <b>Andere Maßnahmen</b>                                        | Ja                | 333          | 48,2%         | 32,3%                |
|                                                                | Nein              | 319          | 46,2%         | 30,9%                |
|                                                                | Weiß nicht/ k.A.  | 39           | 5,6%          | 3,8%                 |

(\*) N entspricht der Subgruppe der 883 Befragten, die (weitere) Lärmreduktionsmaßnahmen für sinnvoll halten.

## VERZEICHNISSE

### Abkürzungsverzeichnis

|            |                                                                                                                                                                                                                                           |
|------------|-------------------------------------------------------------------------------------------------------------------------------------------------------------------------------------------------------------------------------------------|
| AdTLR      | Amt der Tiroler Landesregierung                                                                                                                                                                                                           |
| Anm.       | Anmerkung                                                                                                                                                                                                                                 |
| Bezugszeit | Zeitraum, auf den der Beurteilungspegel bezogen wird:<br><u>Tag:</u> die 13 Tagstunden von 6:00 bis 19:00 Uhr<br><u>Abend:</u> die drei Abendstunden von 19:00 bis 22:00 Uhr<br><u>Nacht:</u> die acht Nachtstunde von 22:00 bis 6:00 Uhr |
| Bf         | Bahnhof                                                                                                                                                                                                                                   |
| BGBI.      | Bundesgesetzblatt                                                                                                                                                                                                                         |
| BMVIT      | Bundesministerium für Verkehr, Innovation und Technologie                                                                                                                                                                                 |
| ca.        | circa                                                                                                                                                                                                                                     |
| dB         | Dezibel                                                                                                                                                                                                                                   |
| dB(A)      | Dezibel, A-bewerteter Schalldruckpegel                                                                                                                                                                                                    |
| DIN        | Deutsches Institut für Normung e.V.                                                                                                                                                                                                       |
| EEA        | European Environment Agency                                                                                                                                                                                                               |
| EFRE       | Europäischer Fonds für regionale Entwicklung                                                                                                                                                                                              |
| EG         | Erdgeschoß                                                                                                                                                                                                                                |
| END        | Environmental noise directive                                                                                                                                                                                                             |
| etc.       | etcetera                                                                                                                                                                                                                                  |
| EU         | Europäische Union                                                                                                                                                                                                                         |
| EU SILC    | EU Community Statistics on Income and Living Conditions                                                                                                                                                                                   |
| h          | Stunde                                                                                                                                                                                                                                    |
| HFA        | Health for All                                                                                                                                                                                                                            |
| ICBEN      | International Commission on Biological Effects of Noise                                                                                                                                                                                   |
| idgF       | in der geltenden/gültigen Fassung                                                                                                                                                                                                         |
| ILO        | International Labour Organisation                                                                                                                                                                                                         |
| JMW        | Jahresmittelwert                                                                                                                                                                                                                          |
| Kfz        | Kraftfahrzeug                                                                                                                                                                                                                             |
| kN         | Kilonewton                                                                                                                                                                                                                                |



|                   |                                                                                                                                                                                                                                                                                                                                                                                                                                    |
|-------------------|------------------------------------------------------------------------------------------------------------------------------------------------------------------------------------------------------------------------------------------------------------------------------------------------------------------------------------------------------------------------------------------------------------------------------------|
| $L_{A,eq}$        | Energieäquivalenter A-bewerteter Dauerschallpegel                                                                                                                                                                                                                                                                                                                                                                                  |
| $L_{A,ES}$        | Effektbezogener Substitutionspegel nach VDI 3722 Blatt 2, beschreibt die energetische Summe der einzelnen, nach den Belästigungsäquivalenten renormierten Ersatzpegeln                                                                                                                                                                                                                                                             |
| $L_{day}$         | A-bewerteter äquivalenter Dauerschallpegel, Beurteilungszeitraum 1 Jahr, Bestimmung an allen Kalendertagen am Tag (06:00 bis 19:00 Uhr)                                                                                                                                                                                                                                                                                            |
| $L_{den}$         | Lärmindeks für die allgemeine Lärmbelastung                                                                                                                                                                                                                                                                                                                                                                                        |
| LEF-K             | Kurzfragebogen zur Erfassung der Lärmempfindlichkeit                                                                                                                                                                                                                                                                                                                                                                               |
| $L_{eq}$          | Energieäquivalenter Dauerschallpegel. Einzahlenangabe, die zur Beschreibung von Schaller- eignissen mit schwankendem Schalldruckpegel dient. Der energieäquivalente Dauerschallpegel wird als jener Schalldruckpegel errechnet, der bei dauernder Einwirkung dem unterbrochenen Geräusch oder Geräusch mit schwankendem Schalldruckpegel energieäquivalent ist                                                                     |
| $L_{evening}$ :   | A-bewerteter äquivalenter Dauerschallpegel, Beurteilungszeitraum 1 Jahr, Bestimmung an allen Kalendertagen am Abend (19:00 bis 22:00 Uhr)                                                                                                                                                                                                                                                                                          |
| Lkw               | Lastkraftwagen                                                                                                                                                                                                                                                                                                                                                                                                                     |
| $L_{night} / L_n$ | A-bewerteter äquivalenter Dauerschallpegel, Beurteilungszeitraum 1 Jahr, Bestimmung an allen Kalendertagen in der Nacht (22:00 bis 6:00 Uhr)                                                                                                                                                                                                                                                                                       |
| $L_p$             | Schalldruckpegel: zehnfacher dekadischer Logarithmus des Verhältnisses der Quadrate des Effektivwertes des Schalldrucks $p$ und des Bezugsschalldrucks $p_0$<br>$L_p = 10 \log (p^2 / p_0^2) \text{ in Dezibel (dB)} \quad \text{mit } p_0 = 20 \mu\text{Pa}$ Sofern eine Verwechslung mit dem Schallleistungspegel nicht zu erwarten ist, wird vielfach statt Schalldruckpegel die vereinfachte Bezeichnung Schallpegel verwendet |
| $L_{p,A}$         | A-bewerteter Schalldruckpegel der mit A-Bewertung, festgelegt in der Verordnung des Bun- desministers für Eich- und Vermessungswesen vom 29.Juni 1979, ermittelte Schalldruckpegel. Die A-Bewertung stellt eine gewisse Annäherung an die Lautheitsempfindung des Menschen dar. Der A-bewertete Schalldruckpegel wird in der Regel für die Beschreibung der Schallimmi- sionen verwendet                                           |
| $L_r$             | Beurteilungspegel: der auf die Bezugszeit bezogene A-bewertete energieäquivalente Dauer- schallpegel des zu beurteilenden Geräusches – wenn nötig – mit Anpassungswerten versehen                                                                                                                                                                                                                                                  |
| LSW               | Lärmschutzwand                                                                                                                                                                                                                                                                                                                                                                                                                     |
| LW                | Schallleistungspegel                                                                                                                                                                                                                                                                                                                                                                                                               |
| $LW_{,A}$         | Schallleistungspegel, A-bewertet                                                                                                                                                                                                                                                                                                                                                                                                   |
| $L_z$             | Anpassungswert: Pegelzu- oder Abschlag für bestimmte Geräuschcharakteristika oder Ge- räuschquellen auf Grund der Lästigkeit                                                                                                                                                                                                                                                                                                       |
| m                 | Meter                                                                                                                                                                                                                                                                                                                                                                                                                              |
| Max.              | Maximum                                                                                                                                                                                                                                                                                                                                                                                                                            |
| Messzeit          | Zeitraum, innerhalb dessen Schalldruckpegel messtechnisch ermittelt werden                                                                                                                                                                                                                                                                                                                                                         |
| Min.              | Minimum                                                                                                                                                                                                                                                                                                                                                                                                                            |
| MW                | Mittelwert                                                                                                                                                                                                                                                                                                                                                                                                                         |

---

|                  |                                                                                                                                                           |
|------------------|-----------------------------------------------------------------------------------------------------------------------------------------------------------|
| N                | Stichprobenumfang                                                                                                                                         |
| N <sub>B</sub> : | Beeinträchtigungskenngröße nach VDI 3722 Blatt 2 zur Aussage über die Anzahl der durch Verkehrsgeräusche im Untersuchungsgebiet beeinträchtigten Personen |
| Nr.              | Nummer                                                                                                                                                    |
| ÖAL              | Österreichischer Arbeitsring für Lärmbekämpfung                                                                                                           |
| ÖBB              | Österreichische Bundesbahnen                                                                                                                              |
| OG               | Obergeschoß                                                                                                                                               |
| ÖNORM            | Österreichische Norm                                                                                                                                      |
| PKW              | Personenkraftwagen                                                                                                                                        |
| SA               | Standardabweichung                                                                                                                                        |
| S.               | Seite                                                                                                                                                     |
| s                | Sekunde                                                                                                                                                   |
| s.               | siehe                                                                                                                                                     |
| SchIV            | Schienenverkehrslärm-Immissionsschutzverordnung                                                                                                           |
| SV               | Sachverständige(r)                                                                                                                                        |
| TB               | Technischer Bericht                                                                                                                                       |
| TBO              | Tiroler Bauordnung                                                                                                                                        |
| TIRIS            | Tiroler Raumordnungsinformationssystem                                                                                                                    |
| TROG             | Tiroler Raumordnungsgesetz                                                                                                                                |
| usw.             | und so weiter                                                                                                                                             |
| u.v.a.m.         | und viele andere mehr                                                                                                                                     |
| UVE              | Umweltverträglichkeitserklärung                                                                                                                           |
| UVP              | Umweltverträglichkeitsprüfung                                                                                                                             |
| UVP-G            | Umweltverträglichkeitsprüfungsgesetz                                                                                                                      |
| V                | Geschwindigkeit                                                                                                                                           |
| VDI              | Verein Deutscher Ingenieure                                                                                                                               |
| vgl.             | vergleiche                                                                                                                                                |
| V <sub>max</sub> | (maximale) Betriebsgeschwindigkeit                                                                                                                        |
| VO               | Verordnung                                                                                                                                                |
| WHO              | World Health Organisation                                                                                                                                 |

## Tabellenverzeichnis

|             |                                                                                                                                                             |     |
|-------------|-------------------------------------------------------------------------------------------------------------------------------------------------------------|-----|
| Tabelle 1:  | Messergebnisse temporäre Dauermessstelle Kranebitten (alle Quellen).....                                                                                    | 45  |
| Tabelle 2:  | Teillärmpegel temporäre Dauermessstelle Kranebitten .....                                                                                                   | 46  |
| Tabelle 3:  | Vergleich der Mess- mit den Berechnungsergebnissen.....                                                                                                     | 46  |
| Tabelle 4:  | Anzahl der belasteten Gebäude, Einwohner und Wohnungen nach Quelle .....                                                                                    | 48  |
| Tabelle 5:  | Anteile der belasteten Gebäude, Einwohnerinnen und Einwohner und Wohnungen bezogen auf ganz Innsbruck nach Quelle in Prozent .....                          | 49  |
| Tabelle 6:  | Mittelwerte der 24h-Lärmbelastung $L_{den}$ nach Quelle in dB.....                                                                                          | 54  |
| Tabelle 7:  | Mittelwerte der 24h-Lärmbelastung $L_{den}$ der Innsbrucker Katastralgemeinden nach Quelle in dB (Innsbruck gesamt und Befragte gegenübergestellt) .....    | 56  |
| Tabelle 8:  | Straßenverkehrslärmbelastung $L_{den}$ in 3 Belastungskategorien nach Katastralgemeinde.....                                                                | 58  |
| Tabelle 9:  | Fluglärmbelastung $L_{den}$ in 3 Belastungskategorien nach Katastralgemeinde .....                                                                          | 58  |
| Tabelle 10: | Schienenverkehrslärmbelastung $L_{den}$ in 3 Belastungskategorien nach Katastralgemeinde.....                                                               | 58  |
| Tabelle 11: | Autobahnlarbbelastung $L_{den}$ in 3 Belastungskategorien nach Katastralgemeinde .....                                                                      | 59  |
| Tabelle 12: | Mittelwerte der nächtlichen Lärmbelastung $L_n$ nach Quelle in dB.....                                                                                      | 60  |
| Tabelle 13: | Mittelwerte der nächtlichen Lärmbelastung $L_n$ der Innsbrucker Katastralgemeinden nach Quelle in dB (Innsbruck gesamt und Befragte gegenübergestellt)..... | 62  |
| Tabelle 14: | Nächtliche Straßenlärmbelastung $L_n$ in 3 Belastungskategorien nach Katastralgemeinde .....                                                                | 64  |
| Tabelle 15: | Nächtliche Schienenlärmbelastung $L_n$ in 3 Belastungskategorien nach Katastralgemeinde .....                                                               | 64  |
| Tabelle 16: | Nächtliche Autobahnlarbbelastung $L_n$ in 3 Belastungskategorien n. Katastralgemeinde.....                                                                  | 64  |
| Tabelle 17: | Nächtliche Fluglärmbelastung $L_n$ in 3 Belastungskategorien nach Katastralgemeinde .....                                                                   | 65  |
| Tabelle 18: | Soll-Ist-Vergleich der Altersgruppen Stichprobe ↔ Interviews .....                                                                                          | 83  |
| Tabelle 19: | Soll-Ist-Vergleich der Geschlechterverteilung Stichprobe ↔ Interviews.....                                                                                  | 83  |
| Tabelle 20: | Schlüssel Katastralgemeinden Innsbruck (nach Einwohneranzahl geordnet) .....                                                                                | 84  |
| Tabelle 21: | Soll-Ist-Vergleich der Katastralgemeinden Stichprobe ↔ Interviews .....                                                                                     | 85  |
| Tabelle 22: | Matrix Lärmkorridore .....                                                                                                                                  | 86  |
| Tabelle 23: | Rücklauf Befragungen Gesamtlärbetrachtung Innsbruck.....                                                                                                    | 88  |
| Tabelle 24: | Mittelwert Alter .....                                                                                                                                      | 93  |
| Tabelle 25: | Höchster bisher erreichter Bildungsabschluss.....                                                                                                           | 94  |
| Tabelle 26: | Kreuztabelle Geschlecht und derzeitige berufliche Stellung in Prozent .....                                                                                 | 96  |
| Tabelle 27: | Wohndauer im selben Haus / derselben Wohnung .....                                                                                                          | 98  |
| Tabelle 28: | Art des Wohnhauses .....                                                                                                                                    | 99  |
| Tabelle 29: | Anzahl an Kindern unter 18 Jahren im selben Haushalt .....                                                                                                  | 100 |
| Tabelle 30: | Stockwerk des Schlafzimmers .....                                                                                                                           | 100 |
| Tabelle 31: | Schutz vor Verkehrslärm durch Innenhof bzw. lärmabgewandte Seite .....                                                                                      | 101 |
| Tabelle 32: | Verbaute Lärmschutzfenster in den letzten 10 Jahren.....                                                                                                    | 102 |
| Tabelle 33: | Auspendleranteil an den berufstätigen bzw. sich in Ausbildung befindlichen befragten Innsbruckerinnen und Innsbruckern (ohne Nichtzutreffende) .....        | 103 |
| Tabelle 34: | Häufigkeit der Nutzung von Kraftfahrzeugen als Fahrerin / Fahrer gruppiert .....                                                                            | 104 |
| Tabelle 35: | Nutzung von Kfz als Fahrerin / Fahrer und ausgewählte Variablen (gruppiert) .....                                                                           | 105 |
| Tabelle 36: | Häufigkeit der Nutzung öffentlicher Verkehrsmittel innerhalb der Stadt gruppiert.....                                                                       | 106 |
| Tabelle 37: | Nutzung öffentl. Verkehrsmittel in der Stadt und ausgewählte Variablen (gruppiert) .....                                                                    | 106 |
| Tabelle 38: | Häufigkeit der Nutzung öffentl. Verkehrsmittel außerhalb von Innsbruck gruppiert .....                                                                      | 107 |
| Tabelle 39: | Nutzung öffentl. Verkehrsmittel außerhalb der Stadt u. ausgew. Variablen (gruppiert).....                                                                   | 107 |

|             |                                                                                                                                       |     |
|-------------|---------------------------------------------------------------------------------------------------------------------------------------|-----|
| Tabelle 40: | Häufigkeit der Nutzung eines Fahrrads gruppiert .....                                                                                 | 109 |
| Tabelle 41: | Nutzung eines Fahrrads und ausgewählte Variablen (gruppiert).....                                                                     | 109 |
| Tabelle 42: | Häufigkeit fußläufiger Wege gruppiert .....                                                                                           | 110 |
| Tabelle 43: | Fußläufige Wege und ausgewählte Variablen (gruppiert) .....                                                                           | 110 |
| Tabelle 44: | Häufigkeit der Nutzung eines Flugzeuges gruppiert .....                                                                               | 111 |
| Tabelle 45: | Nutzung eines Flugzeugs und ausgewählte Variablen (gruppiert).....                                                                    | 112 |
| Tabelle 46: | Beurteilung der Wohnbedingungen gruppiert.....                                                                                        | 114 |
| Tabelle 47: | Beurteilung der Nachbarschaftsbeziehungen gruppiert .....                                                                             | 115 |
| Tabelle 48: | Beurteilung der Sicherheit gruppiert .....                                                                                            | 115 |
| Tabelle 49: | Beurteilung der Landschaft, Natur, Parks und Grünflächen gruppiert.....                                                               | 116 |
| Tabelle 50: | Beurteilung der Luftqualität gruppiert.....                                                                                           | 117 |
| Tabelle 51: | Beurteilung der öffentlichen Verkehrsverbindungen gruppiert.....                                                                      | 118 |
| Tabelle 52: | Beurteilung der Bedingungen für das Aufwachsen von Kinder gruppiert .....                                                             | 118 |
| Tabelle 53: | Beurteilung der Verbundenheit zur Stadt Innsbruck gruppiert .....                                                                     | 119 |
| Tabelle 54: | Lebensbedingungen und Katastralgemeinde im Mittelwertvergleich .....                                                                  | 120 |
| Tabelle 55: | Lebensbedingungen und Geschlecht im Mittelwertvergleich.....                                                                          | 121 |
| Tabelle 56: | Lebensbedingungen und Lärmempfindlichkeit im Mittelwertvergleich .....                                                                | 123 |
| Tabelle 57: | Lebensbedingungen und 24h-Schienenlärmbelastung $L_{den}$ im Mittelwertvergleich.....                                                 | 125 |
| Tabelle 58: | Lebensbedingungen und 24h-Fluglärmbelastung $L_{den}$ im Mittelwertvergleich .....                                                    | 126 |
| Tabelle 59: | Lebensbedingungen und Straßenlärmexpositionsempfinden im Mittelwertvergleich .....                                                    | 127 |
| Tabelle 60: | Lebensbedingungen und Belästigung durch Nachbarschaftslärm im Mittelwertvergleich .....                                               | 131 |
| Tabelle 61: | Lebensbedingungen und Belästigung durch Baustellenlärm im Mittelwertvergleich.....                                                    | 131 |
| Tabelle 62: | Lebensbedingungen und Belästigung durch Lärm von Passanten und Gaststätten im Mittelwertvergleich.....                                | 132 |
| Tabelle 63: | Lebensbedingungen und Belästigung durch Erschütterungen im Mittelwertvergleich.....                                                   | 132 |
| Tabelle 64: | Lebensbedingungen und Belästigung durch Lärm aus Gewerbe und Industrie im Mittelwertvergleich.....                                    | 133 |
| Tabelle 65: | Zufriedenheit mit der eigenen Wohnsituation gruppiert.....                                                                            | 134 |
| Tabelle 66: | Zufriedenheit mit der eigenen Wohnsituation u. Katastralgemeinde im Mittelwertvergleich ....                                          | 135 |
| Tabelle 67: | Zufriedenheit mit der Wohnsituation und ausgewählte Variablen (gruppiert) .....                                                       | 136 |
| Tabelle 68: | Zufriedenheit mit der Wohnsituation und 24h-Straßenverkehrslärmbelastung $L_{den}$ in 10-dB Schritten im Mittelwertvergleich.....     | 138 |
| Tabelle 69: | Zufriedenheit mit der Wohnsituation und 24h-Flugverkehrslärmbelastung $L_{den}$ in 10-dB Schritten im Mittelwertvergleich .....       | 139 |
| Tabelle 70: | Zufriedenheit mit der Wohnsituation und 24h-Schienenverkehrslärmbelastung $L_{den}$ in 10-dB Schritten im Mittelwertvergleich.....    | 139 |
| Tabelle 71: | Zufriedenheit mit der Wohnsituation und nächtliche Flugverkehrslärmbelastung $L_n$ in 10-dB Schritten im Mittelwertvergleich.....     | 140 |
| Tabelle 72: | Zufriedenheit mit der Wohnsituation und nächtliche Schienenverkehrslärmbelastung $L_n$ in 10-dB Schritten im Mittelwertvergleich..... | 141 |
| Tabelle 73: | Zufriedenheit mit der Wohnsituation und Lärmbelästigung gesamt im Mittelwertvergleich.....                                            | 143 |
| Tabelle 74: | Einschätzung des eigenen Gesundheitszustandes gruppiert .....                                                                         | 145 |
| Tabelle 75: | Einschätzung des eigenen Gesundheitszustandes (gruppiert) und ausgewählte Variablen....                                               | 146 |
| Tabelle 76: | Bivariate Korrelation zu Gesundheitszustand und 24h-Lärmbelastung $L_{den}$ nach Quelle .....                                         | 147 |
| Tabelle 77: | Gesundheitszustand und Lärmexpositionsempfinden nach Quelle (gruppiert).....                                                          | 147 |
| Tabelle 78: | Einschätzung der persönlichen Lebensqualität gruppiert.....                                                                           | 150 |

|              |                                                                                                                                                  |     |
|--------------|--------------------------------------------------------------------------------------------------------------------------------------------------|-----|
| Tabelle 79:  | Einschätzung der eigenen Lebensqualität (gruppiert) und ausgewählte Variablen.....                                                               | 151 |
| Tabelle 80:  | Bivariate Korrelation zu Lebensqualität und 24h-Lärmbelastung $L_{den}$ nach Quelle .....                                                        | 152 |
| Tabelle 81:  | Lebensqualität und Lärmexpositionsempfinden nach Quelle (gruppiert).....                                                                         | 153 |
| Tabelle 82:  | Einschätzung der eigenen Lärmempfindlichkeit gruppiert.....                                                                                      | 156 |
| Tabelle 83:  | Einschätzung der eigenen Lärmempfindlichkeit (gruppiert) und ausgewählte Variablen .....                                                         | 157 |
| Tabelle 84:  | Bivariate Korrelation zu Lärmempfindlichkeit und 24h-Lärmbelastung $L_{den}$ nach Quelle.....                                                    | 158 |
| Tabelle 85:  | Lärmempfindlichkeit und 24h-Straßenlärm $L_{den}$ in 10-dB Schritten im Mittelwertvergleich .....                                                | 158 |
| Tabelle 86:  | Lärmempfindlichkeit und 24h-Fluglärm $L_{den}$ in 10-dB Schritten im Mittelwertvergleich.....                                                    | 158 |
| Tabelle 87:  | Lärmempfindlichkeit und 24h-Schienenlärm $L_{den}$ in 10-dB Schritten im Mittelwertvergleich ....                                                | 159 |
| Tabelle 88:  | Lärmempfindlichkeit und Lärmexpositionsempfinden nach Quelle (gruppiert) .....                                                                   | 159 |
| Tabelle 89:  | Lärmempfindlichkeit und Belästigung durch Verkehrslärm nach Quelle gruppiert .....                                                               | 161 |
| Tabelle 90:  | Einfluss von Wind- und Wetterverhältnissen auf die Lärmbelastung gruppiert.....                                                                  | 163 |
| Tabelle 91:  | Einfluss von Wind- und Wetterverhältnissen auf die Lärmbelastung und ausgewählte Parameter<br>(gruppiert, ohne Antwortkategorie k.A./w.n.) ..... | 164 |
| Tabelle 92:  | Nachtschlaf bei geöffnetem oder gekipptem Fenster gruppiert .....                                                                                | 166 |
| Tabelle 93:  | Nachtschlaf bei geöffnetem oder gekipptem Fenster und ausgewählte Parameter (gruppiert,<br>ohne Antwortkategorie k.A./w.n.).....                 | 167 |
| Tabelle 94:  | Nachtschlaf bei geöffnetem oder gekipptem Fenster und nächtliche Lärmbelastung $L_n$ nach<br>Quelle (gruppiert) .....                            | 168 |
| Tabelle 95:  | Mittelwerte der empfundenen Exposition nach Quelle .....                                                                                         | 170 |
| Tabelle 96:  | Empfundene Lärmexposition insgesamt gruppiert.....                                                                                               | 174 |
| Tabelle 97:  | Empfundene Lärmexposition insgesamt und ausgewählte Parameter (gruppiert).....                                                                   | 175 |
| Tabelle 98:  | Empfundene Flugverkehrslärmexposition gruppiert.....                                                                                             | 177 |
| Tabelle 99:  | Empfundene Fluglärmexposition und ausgewählte Parameter (gruppiert).....                                                                         | 179 |
| Tabelle 100: | Empfundene Straßenverkehrslärmexposition gruppiert .....                                                                                         | 181 |
| Tabelle 101: | Empfundene Straßenlärmexposition und ausgewählte Parameter (gruppiert) .....                                                                     | 183 |
| Tabelle 102: | Empfundene Baustellenlärmexposition gruppiert .....                                                                                              | 185 |
| Tabelle 103: | Empfundene Baustellenlärmexposition und ausgewählte Parameter (gruppiert).....                                                                   | 186 |
| Tabelle 104: | Empfundene Nachbarschaftslärmexposition gruppiert.....                                                                                           | 187 |
| Tabelle 105: | Empfundene Nachbarschaftslärmexposition und ausgewählte Parameter (gruppiert).....                                                               | 188 |
| Tabelle 106: | Empfundene Lärmexposition durch Passanten und Gaststätten gruppiert.....                                                                         | 190 |
| Tabelle 107: | Empfundene Lärmexposition durch Passanten und Gaststätten und ausgewählte Parameter<br>(gruppiert) .....                                         | 191 |
| Tabelle 108: | Empfundene Exposition gegenüber Erschütterungen gruppiert .....                                                                                  | 193 |
| Tabelle 109: | Empfundene Erschütterungsexposition und ausgewählte Parameter (gruppiert) .....                                                                  | 194 |
| Tabelle 110: | Empfundene Schienenverkehrslärmexposition gruppiert .....                                                                                        | 196 |
| Tabelle 111: | Empfundene Schienenlärmexposition und ausgewählte Parameter (gruppiert) .....                                                                    | 198 |
| Tabelle 112: | Empfundene Autobahnlärmexposition gruppiert.....                                                                                                 | 199 |
| Tabelle 113: | Empfundene Autobahnlärmexposition und ausgewählte Parameter (gruppiert).....                                                                     | 200 |
| Tabelle 114: | Empfundene Lärmexposition durch Gewerbe und Industrie gruppiert .....                                                                            | 202 |
| Tabelle 115: | Empfundene Lärmexposition durch Gewerbe und Industrie und ausgewählte Parameter .....                                                            | 202 |
| Tabelle 116: | Mittelwerte der Belästigung nach Quelle.....                                                                                                     | 204 |
| Tabelle 117: | Belästigung nach Lärmquelle und Katastralgemeinde im Mittelwertvergleich .....                                                                   | 207 |
| Tabelle 118: | Belästigung durch Lärm insgesamt gruppiert.....                                                                                                  | 210 |
| Tabelle 119: | Bedingungen für das Aufwachsen von Kindern und Belästigung durch Lärm insgesamt.....                                                             | 212 |
| Tabelle 120: | Belästigung durch Lärm insgesamt und ausgewählte Parameter (gruppiert) .....                                                                     | 213 |

|              |                                                                                                                     |     |
|--------------|---------------------------------------------------------------------------------------------------------------------|-----|
| Tabelle 121: | Belästigung durch Fluglärm gruppiert .....                                                                          | 215 |
| Tabelle 122: | Belästigung durch Fluglärm und ausgewählte Parameter (gruppiert) .....                                              | 217 |
| Tabelle 123: | Belästigung durch Straßenverkehrslärm gruppiert .....                                                               | 219 |
| Tabelle 124: | Geschlecht und Belästigung durch Straßenverkehrslärm gruppiert .....                                                | 221 |
| Tabelle 125: | Belästigung durch Straßenverkehrslärm und ausgewählte Parameter (gruppiert) .....                                   | 222 |
| Tabelle 126: | Belästigung durch Baustellenlärm gruppiert .....                                                                    | 224 |
| Tabelle 127: | Belästigung durch Baustellenlärm und ausgewählte Parameter (gruppiert) .....                                        | 225 |
| Tabelle 128: | Belästigung durch Nachbarschaftslärm gruppiert .....                                                                | 227 |
| Tabelle 129: | Belästigung durch Nachbarschaftslärm und ausgewählte Parameter (gruppiert) .....                                    | 228 |
| Tabelle 130: | Belästigung durch Lärm von Passanten und Gaststätten gruppiert .....                                                | 230 |
| Tabelle 131: | Belästigung durch Lärm von Passanten und Gaststätten und ausgewählte Parameter .....                                | 230 |
| Tabelle 132: | Belästigung durch Schienenverkehrslärm gruppiert .....                                                              | 232 |
| Tabelle 133: | Schienenverkehrslärmbelästigung und Bildungsschicht im Mittelwertvergleich .....                                    | 234 |
| Tabelle 134: | Belästigung durch Schienenverkehrslärm und ausgewählte Parameter (gruppiert) .....                                  | 234 |
| Tabelle 135: | Belästigung durch Erschütterungen gruppiert .....                                                                   | 236 |
| Tabelle 136: | Belästigung durch Erschütterungen und ausgewählte Parameter (gruppiert) .....                                       | 237 |
| Tabelle 137: | Belästigung durch Lärm aus Gewerbe u. Industrie gruppiert .....                                                     | 239 |
| Tabelle 138: | Belästigung durch Lärm aus Gewerbe und Industrie und ausgewählte Parameter .....                                    | 240 |
| Tabelle 139: | Belästigung durch Autobahnlärm gruppiert .....                                                                      | 242 |
| Tabelle 140: | Belästigung durch Autobahnlärm und ausgewählte Parameter (gruppiert) .....                                          | 243 |
| Tabelle 141: | Mittelwerte der Belästigung im Schlaf nach Quelle .....                                                             | 245 |
| Tabelle 142: | Belästigung im Schlaf nach Lärmquelle und Katastralgemeinde im Mittelwertvergleich .....                            | 248 |
| Tabelle 143: | Belästigung im Schlaf durch Lärm gesamt gruppiert .....                                                             | 251 |
| Tabelle 144: | Belästigung im Schlaf durch Lärm insgesamt und Nachtschlaf im Mittelwertvergleich .....                             | 252 |
| Tabelle 145: | Belästigung im Schlaf durch Lärm insgesamt und ausgewählte Parameter .....                                          | 254 |
| Tabelle 146: | Belästigung im Schlaf durch Straßenverkehrslärm gruppiert .....                                                     | 256 |
| Tabelle 147: | Belästigung im Schlaf durch Straßenverkehrslärm und ausgewählte Parameter .....                                     | 259 |
| Tabelle 148: | Belästigung im Schlaf durch Lärm von Passanten und Gaststätten gruppiert .....                                      | 261 |
| Tabelle 149: | Belästigung im Schlaf durch Passanten und Gaststätten und ausgewählte Parameter .....                               | 262 |
| Tabelle 150: | Belästigung im Schlaf durch Nachbarschaftslärm gruppiert .....                                                      | 264 |
| Tabelle 151: | Belästigung im Schlaf durch Nachbarschaftslärm und ausgewählte Parameter .....                                      | 265 |
| Tabelle 152: | Belästigung im Schlaf durch Fluglärm gruppiert .....                                                                | 267 |
| Tabelle 153: | Belästigung im Schlaf durch Flugverkehrslärm und höchster erreichter Bildungsabschluss im Mittelwertvergleich ..... | 269 |
| Tabelle 154: | Belästigung im Schlaf durch Flugverkehrslärm und ausgewählte Parameter .....                                        | 269 |
| Tabelle 155: | Belästigung im Schlaf durch Lärm von Baustellen gruppiert .....                                                     | 271 |
| Tabelle 156: | Belästigung im Schlaf durch Baustellenlärm und ausgewählte Parameter .....                                          | 272 |
| Tabelle 157: | Belästigung im Schlaf durch Schienenverkehrslärm gruppiert .....                                                    | 274 |
| Tabelle 158: | Belästigung im Schlaf durch Schienenverkehrslärm und ausgewählte Parameter .....                                    | 275 |
| Tabelle 159: | Belästigung im Schlaf durch Erschütterungen gruppiert .....                                                         | 277 |
| Tabelle 160: | Belästigung im Schlaf durch Erschütterungen und ausgewählte Parameter .....                                         | 278 |
| Tabelle 161: | Belästigung im Schlaf durch Lärm von Gewerbe und Industrie gruppiert .....                                          | 280 |
| Tabelle 162: | Belästigung im Schlaf durch Lärm von Gewerbe / Industrie und ausgewählte Parameter .....                            | 281 |
| Tabelle 163: | Belästigung im Schlaf durch Autobahnlärm gruppiert .....                                                            | 283 |
| Tabelle 164: | Belästigung im Schlaf durch Autobahnlärm und ausgewählte Parameter .....                                            | 284 |
| Tabelle 165: | Lärmcopingreaktionen im Mittelwertvergleich (absteigend sortiert) .....                                             | 287 |

|              |                                                                                                            |     |
|--------------|------------------------------------------------------------------------------------------------------------|-----|
| Tabelle 166: | Emotionales Lärmcoping und Lärmbelastung nach Quelle (gruppiert) .....                                     | 290 |
| Tabelle 167: | Emotionales Lärmcoping und ausgewählte Parameter (gruppiert) .....                                         | 291 |
| Tabelle 168: | Politisches Lärmcoping und ausgewählte Parameter (gruppiert) .....                                         | 293 |
| Tabelle 169: | Summenscore Lärmcoping und ausgewählte Parameter (gruppiert) .....                                         | 294 |
| Tabelle 170: | Summenscore Lärmcoping und Lärmbelästigung (gruppiert) .....                                               | 296 |
| Tabelle 171: | Empfundene Zu- und Abnahme der Lärmbelastung und ausgewählte Parameter .....                               | 298 |
| Tabelle 172: | Empfundene Zu- und Abnahme der Lärmbelastung und Belästigung nach Quelle .....                             | 300 |
| Tabelle 173: | Einschätzung der negativen Wirkung von Lärm auf die Gesundheit gruppiert .....                             | 302 |
| Tabelle 174: | Mittelwert der Einschätzung der negativen Wirkung von Lärm auf die Gesundheit .....                        | 302 |
| Tabelle 175: | Einschätzung der negativen Wirkung von Lärm auf die Gesundheit und ausgewählte Parameter (gruppiert) ..... | 303 |
| Tabelle 176: | Bekanntheit der Umgebungslärmkarten und ausgewählte Parameter (gruppiert) .....                            | 305 |
| Tabelle 177: | Einschätzung des Lärmniveaus im Städtevergleich gruppiert .....                                            | 306 |
| Tabelle 178: | Mittelwert der Einschätzung des Lärmniveaus im Städtevergleich .....                                       | 306 |
| Tabelle 179: | Einschätzung des Lärmniveaus im Städtevergleich und ausgewählte Parameter .....                            | 308 |
| Tabelle 180: | Einschätzung des eigenen Lärmbeitrags gruppiert .....                                                      | 310 |
| Tabelle 181: | Mittelwert Einschätzung des eigenen Lärmbeitrags .....                                                     | 310 |
| Tabelle 182: | Einschätzung des eigenen Lärmbeitrags und demographische Parameter (gruppiert) .....                       | 311 |
| Tabelle 183: | Einschätzung der störendsten Lärmquelle in Innsbruck und demographische Parameter .....                    | 313 |
| Tabelle 184: | Einschätzung der störendsten Lärmquelle in Innsbruck und ausgewählte Parameter .....                       | 315 |
| Tabelle 185: | Einschätzung der störendsten Lärmquelle in Innsbruck und Lärmbelastung nach Quelle .....                   | 316 |
| Tabelle 186: | Einschätzung der störendsten Lärmquelle in Innsbruck u. Lärmbelästigung nach Quelle .....                  | 318 |
| Tabelle 187: | Sinnhaftigkeit (weiterer) Maßnahmen zur Lärmreduktion in Innsbruck (ohne w.n. / k.A.) .....                | 319 |
| Tabelle 188: | Sinnhaftigkeit von Maßnahmen zur Lärmreduktion und ausgewählte Parameter .....                             | 321 |
| Tabelle 189: | Sinnhaftigkeit von Maßnahmen zur Lärmreduktion und Lärmbelastung nach Quelle .....                         | 321 |
| Tabelle 190: | Sinnhaftigkeit von Maßnahmen zur Lärmreduktion und Lärmbelästigung nach Quelle .....                       | 323 |
| Tabelle 191: | Sinnhaftigkeit Einzelmaßnahmen zur Lärmreduktion in Innsbruck .....                                        | 325 |

## Abbildungsverzeichnis

|               |                                                                                                                                      |    |
|---------------|--------------------------------------------------------------------------------------------------------------------------------------|----|
| Abbildung 1:  | Katastralgemeinden Innsbruck .....                                                                                                   | 35 |
| Abbildung 2:  | Einwohnerschaft Innsbrucks mit Hauptwohnsitz nach Katastralgemeinden (2016) .....                                                    | 36 |
| Abbildung 3:  | Demographische Strukturen in Innsbruck auf einen Blick .....                                                                         | 36 |
| Abbildung 4:  | Alterspyramide der Bevölkerung von Innsbruck nach Geschlecht 2016 .....                                                              | 37 |
| Abbildung 5:  | Bevölkerung von Innsbruck nach höchstem erreichten Schulabschluss (2014) .....                                                       | 37 |
| Abbildung 6:  | Überblick der Verkehrslärmbelastung nach Quelle .....                                                                                | 48 |
| Abbildung 7:  | Prozentuelle Verteilung der Belastung der Gebäude und Wohnungen in Innsbruck nach Quelle .....                                       | 49 |
| Abbildung 8:  | Rasterlärmkarte 24h-Fluglärm $L_{den}$ in Innsbruck gruppiert nach Belastungskategorien .....                                        | 50 |
| Abbildung 9:  | Rasterlärmkarte 24h-Schienenverkehrslärm $L_{den}$ in Innsbruck gruppiert nach Belastungskategorien .....                            | 51 |
| Abbildung 10: | Rasterlärmkarte 24h-Straßenverkehrslärm $L_{den}$ in Innsbruck gruppiert nach Belastungskategorien .....                             | 52 |
| Abbildung 11: | Übersicht der ausgewerteten Katastralgemeinden in Innsbruck .....                                                                    | 53 |
| Abbildung 12: | Mittelwertvergleich der 24h-Lärmbelastung $L_{den}$ nach Quelle in dB .....                                                          | 54 |
| Abbildung 13: | Vergleich gruppierte Häufigkeit der 24h-Lärmbelastung $L_{den}$ nach Quelle in Prozent .....                                         | 55 |
| Abbildung 14: | Mittelwertvergleich der 24h-Lärmbelastung $L_{den}$ bewohnter Gebäude der Innsbrucker Katastralgemeinden nach Quelle in dB .....     | 55 |
| Abbildung 15: | Stark verkehrslärmbelastete Adresspunkte in Innsbruck nach Quelle und Katastralgemeinde in Prozent .....                             | 57 |
| Abbildung 16: | Mittelwertvergleich der nächtlichen Lärmbelastung $L_n$ nach Quelle in dB .....                                                      | 59 |
| Abbildung 17: | Vergleich gruppierte Häufigkeit der nächtlichen Lärmbelastung $L_n$ nach Quelle in Prozent .....                                     | 61 |
| Abbildung 18: | Mittelwertvergleich der nächtlichen Lärmbelastung $L_n$ bewohnter Gebäude der Innsbrucker Katastralgemeinden nach Quelle in dB ..... | 61 |
| Abbildung 19: | In der Nacht stark verkehrslärmbelastete Adresspunkte in Innsbruck nach Quelle und Katastralgemeinde in Prozent .....                | 63 |
| Abbildung 20: | Rasterlärmkarte für den Autobahnverkehr als $L_{den}$ in 4 m Höhe .....                                                              | 67 |
| Abbildung 21: | Rasterlärmkarte für den Straßenverkehr als $L_{den}$ in 4 m Höhe .....                                                               | 68 |
| Abbildung 22: | Rasterlärmkarte für den Flugverkehr als $L_{den}$ in 4 m Höhe .....                                                                  | 70 |
| Abbildung 23: | Rasterlärmkarte für den Flugverkehr als $L_{A,ES}$ in 4 m Höhe .....                                                                 | 71 |
| Abbildung 24: | Rasterlärmkarte für den Schienenverkehr als $L_{den}$ in 4 m Höhe .....                                                              | 72 |
| Abbildung 25: | Rasterlärmkarte für den Schienenverkehr als $L_{A,ES}$ in 4 m Höhe .....                                                             | 73 |
| Abbildung 26: | Rasterlärmkarte für den Gesamtlärm als effektbezogener Substitutionspegel $L_{A,ES}$ in 4 m Höhe .....                               | 75 |
| Abbildung 27: | Hotspotanalyse in 200 m Rasterzellen auf Basis der Lärmkennziffer .....                                                              | 76 |
| Abbildung 28: | Ausweisung „ruhiger Gebiete“ mit einem effektbezogener Substitutionspegel $L_{A,ES}$ in 4 m Höhe kleiner 55 dB .....                 | 78 |
| Abbildung 29: | Angepasster Befragungsschlüssel Katastralgemeinden Innsbruck .....                                                                   | 85 |
| Abbildung 30: | Bevölkerungspyramide der befragten Personen nach Altersgruppe und Geschlecht .....                                                   | 93 |
| Abbildung 31: | Bildungsschichten kategorisiert nach höchstem erreichten Schulabschluss .....                                                        | 94 |
| Abbildung 32: | Höchster bisher erreichter Bildungsabschluss nach Geschlecht .....                                                                   | 95 |
| Abbildung 33: | Höchster Bildungsabschluss innerhalb kategorisierter Altersgruppen .....                                                             | 95 |
| Abbildung 34: | Berufliche Stellung der Befragten in Prozent .....                                                                                   | 96 |



|               |                                                                                                                         |     |
|---------------|-------------------------------------------------------------------------------------------------------------------------|-----|
| Abbildung 35: | Wohndauer in derselben Wohnung nach Alter .....                                                                         | 98  |
| Abbildung 36: | Eigentumsverhältnisse der Wohnung / des Hauses .....                                                                    | 99  |
| Abbildung 37: | Haushaltsgröße in Prozent.....                                                                                          | 99  |
| Abbildung 38: | Schutz vor Verkehrslärm durch bauliche Abschirmungen in Prozent.....                                                    | 101 |
| Abbildung 39: | Vorrangiges Schutzziel der Lärmschutzfenster nach Lärmquelle in Prozent.....                                            | 102 |
| Abbildung 40: | Auspendleranteil gesamt in Prozent .....                                                                                | 103 |
| Abbildung 41: | Vorrangiges Verkehrsmittel auf dem Weg zum Arbeits- oder Ausbildungsplatz in Prozent.....                               | 104 |
| Abbildung 42: | Häufigkeit der Nutzung von Kraftfahrzeugen als FahrerIn / Fahrer in Prozent .....                                       | 104 |
| Abbildung 43: | Häufigkeit der Nutzung öffentlicher Verkehrsmittel in Innsbruck in Prozent .....                                        | 106 |
| Abbildung 44: | Häufigkeit der Nutzung öffentl. Verkehrsmittel außerhalb von Innsbruck in % .....                                       | 107 |
| Abbildung 45: | Häufigkeit der Nutzung von Fahrrädern in Prozent.....                                                                   | 108 |
| Abbildung 46: | Häufigkeit fußläufiger Wege in Prozent.....                                                                             | 110 |
| Abbildung 47: | Häufigkeit der Nutzung von Flugzeugen in Prozent.....                                                                   | 111 |
| Abbildung 48: | Mittelwertvergleich der Lebensbedingungen .....                                                                         | 113 |
| Abbildung 49: | Beurteilung der Wohnbedingungen in Prozent.....                                                                         | 114 |
| Abbildung 50: | Beurteilung der Nachbarschaftsbeziehungen in Prozent .....                                                              | 114 |
| Abbildung 51: | Beurteilung der Sicherheit in Prozent .....                                                                             | 115 |
| Abbildung 52: | Beurteilung von Landschaft, Natur, Parks und Grünflächen in Prozent .....                                               | 116 |
| Abbildung 53: | Beurteilung der Luftqualität in Prozent.....                                                                            | 117 |
| Abbildung 54: | Beurteilung der öffentlichen Verkehrsmittel in Prozent .....                                                            | 117 |
| Abbildung 55: | Beurteilung der Bedingungen für das Aufwachsen von Kinder in Prozent .....                                              | 118 |
| Abbildung 56: | Beurteilung der Verbundenheit zur Stadt Innsbruck in Prozent .....                                                      | 119 |
| Abbildung 57: | Summenscore Lebensbedingungen und Katastralgemeinde im Mittelwertvergleich<br>(aufsteigend sortiert).....               | 120 |
| Abbildung 58: | Lebensbedingungen und Alter (gruppiert) im Mittelwertvergleich .....                                                    | 122 |
| Abbildung 59: | Lebensbedingungen und höchster Schulabschluss (gruppiert) im Mittelwertvergleich .....                                  | 122 |
| Abbildung 60: | Lebensbedingungen und Gesundheitszustand (gruppiert) im Mittelwertvergleich .....                                       | 123 |
| Abbildung 61: | Lebensbedingungen und persönl. Lebensqualität (gruppiert) im Mittelwertvergleich.....                                   | 124 |
| Abbildung 62: | Lebensbedingungen und 24h-Straßenverkehrslärmbelastung $L_{den}$ (gruppiert) im<br>Mittelwertvergleich.....             | 125 |
| Abbildung 63: | Lebensbedingungen und Lärmexpositionsempfinden insgesamt (gruppiert) im<br>Mittelwertvergleich.....                     | 126 |
| Abbildung 64: | Lebensbedingungen und Fluglärmbelastungsempfinden (gruppiert) im Mittelwertvergleich....                                | 127 |
| Abbildung 65: | Lebensbedingungen und Schienenverkehrslärmbelastungsempfinden (gruppiert) im<br>Mittelwertvergleich.....                | 128 |
| Abbildung 66: | Lebensbedingungen und Lärmbelästigung insgesamt (gruppiert) im Mittelwertvergleich .....                                | 129 |
| Abbildung 67: | Lebensbedingungen und Straßenlärmbelästigung (gruppiert) im Mittelwertvergleich .....                                   | 129 |
| Abbildung 68: | Lebensbedingungen und Fluglärmbelästigung (gruppiert) im Mittelwertvergleich .....                                      | 130 |
| Abbildung 69: | Lebensbedingungen und Schienenlärmbelästigung (gruppiert) im Mittelwertvergleich.....                                   | 130 |
| Abbildung 70: | Lebensbedingungen nach Nachtschlaf bei offenem oder gekippten Fenster (gruppiert) im<br>Mittelwertvergleich.....        | 133 |
| Abbildung 71: | Zufriedenheit mit der eigenen Wohnsituation in Prozent.....                                                             | 134 |
| Abbildung 72: | Zufriedenheit mit der eigenen Wohnsituation und Katastralgemeinde im Mittelwertvergleich<br>(aufsteigend sortiert)..... | 135 |
| Abbildung 73: | Anteilige Zufriedenheit mit der Wohnsituation nach Lärmempfindlichkeit (gruppiert) .....                                | 137 |
| Abbildung 74: | Zufriedenheit mit der Wohnsituation und 24h-Straßenlärmbelastung $L_{den}$ (gruppiert) .....                            | 137 |

|                |                                                                                                                                                                    |     |
|----------------|--------------------------------------------------------------------------------------------------------------------------------------------------------------------|-----|
| Abbildung 75:  | Zufriedenheit mit der Wohnsituation und 24h-Straßenverkehrslärmbelastung $L_{den}$ in 10-dB Schritten im Mittelwertvergleich.....                                  | 138 |
| Abbildung 76:  | Zufriedenheit mit der Wohnsituation und 24h-Fluglärmbelastung $L_{den}$ (gruppiert) .....                                                                          | 138 |
| Abbildung 77:  | Zufriedenheit mit der Wohnsituation und 24h-Schienenlärmbelastung $L_{den}$ (gruppiert) .....                                                                      | 139 |
| Abbildung 78:  | Zufriedenheit mit der Wohnsituation und nächtliche Straßenverkehrslärmbelastung $L_n$ in 10-dB Schritten im Mittelwertvergleich.....                               | 140 |
| Abbildung 79:  | Zufriedenheit mit der Wohnsituation und verkehrsverursachtes Lärmexpositionsempfinden im Mittelwertvergleich.....                                                  | 141 |
| Abbildung 80:  | Zufriedenheit mit der Wohnsituation und nichtverkehrsverursachtes Lärmexpositionsempfinden im Mittelwertvergleich .....                                            | 142 |
| Abbildung 81:  | Zufriedenheit mit der Wohnsituation und Lärmbelästigung gesamt im Mittelwertvergleich.....                                                                         | 142 |
| Abbildung 82:  | Zufriedenheit mit der Wohnsituation und Lärmbelästigung nach Quelle (gruppiert) im Mittelwertvergleich (aufsteigend sortiert nach Pearsons Rho).....               | 143 |
| Abbildung 83:  | Zufriedenheit mit der Wohnsituation und Lärmbelästigung in der Nacht nach Quelle (gruppiert) im Mittelwertvergleich (aufsteigend sortiert nach Pearsons Rho) ..... | 144 |
| Abbildung 84:  | Einschätzung des eigenen Gesundheitszustandes in Prozent .....                                                                                                     | 145 |
| Abbildung 85:  | Einschätzung des eigenen Gesundheitszustandes und höchster erreichter Schulabschluss nach Altersgruppen (gruppiert) im Mittelwertvergleich .....                   | 146 |
| Abbildung 86:  | Gesundheitszustand und Lärmbelästigung nach Quelle (gruppiert) im Mittelwertvergleich (aufsteigend sortiert nach Extremwertdifferenz) .....                        | 148 |
| Abbildung 87:  | Einschätzung der persönlichen Lebensqualität in Prozent .....                                                                                                      | 150 |
| Abbildung 88:  | Einschätzung der Lebensqualität und höchster erreichter Schulabschluss (gruppiert) .....                                                                           | 151 |
| Abbildung 89:  | Einschätzung der eigenen Lebensqualität und nächtliche Straßenverkehrslärmbelastung $L_n$ in 10dB-Schritten im Mittelwertvergleich.....                            | 152 |
| Abbildung 90:  | Lebensqualität und Expositionsempfinden Lärm insgesamt im Mittelwertvergleich .....                                                                                | 153 |
| Abbildung 91:  | Lebensqualität und Belästigung durch Lärm insgesamt im Mittelwertvergleich .....                                                                                   | 154 |
| Abbildung 92:  | Lebensqualität und Lärmbelästigung nach Quelle (gruppiert) im Mittelwertvergleich (aufsteigend sortiert nach Extremwertdifferenz).....                             | 155 |
| Abbildung 93:  | Lebensqualität und Lärmbelästigung im Schlaf nach Quelle (gruppiert) im Mittelwertvergleich (aufsteigend sortiert nach Extremwertdifferenz) .....                  | 155 |
| Abbildung 94:  | Einschätzung der eigenen Lärmempfindlichkeit in Prozent.....                                                                                                       | 156 |
| Abbildung 95:  | Lärmempfindlichkeit und Belästigung durch Lärm insgesamt im Mittelwertvergleich .....                                                                              | 160 |
| Abbildung 96:  | Lärmempfindlichkeit und Belästigung durch Lärm nach Quelle (gruppiert) im Mittelwertvergleich (aufsteigend sortiert nach Extremwertdifferenz) .....                | 161 |
| Abbildung 97:  | Lärmempfindlichkeit und Belästigung durch Verkehrslärm nach Quelle (gruppiert) im Mittelwertvergleich.....                                                         | 162 |
| Abbildung 98:  | Lärmempfindlichkeit und Belästigung durch Lärm im Schlaf nach Quelle (gruppiert) im Mittelwertvergleich (aufsteigend sortiert nach Extremwertdifferenz) .....      | 162 |
| Abbildung 99:  | Ausmaß des Einflusses von Wind- und Wetterverhältnissen auf die Lärmbelastung.....                                                                                 | 163 |
| Abbildung 100: | Nachtschlaf bei geöffnetem oder gekipptem Fenster in Prozent .....                                                                                                 | 166 |
| Abbildung 101: | Nachtschlaf bei geöffnetem oder gekipptem Fenster und nächtliche Straßenverkehrslärmbelastung $L_n$ in 10-db Schritten im Mittelwertvergleich.....                 | 168 |
| Abbildung 102: | Mittelwertvergleich der empfundenen Exposition nach Quelle .....                                                                                                   | 170 |
| Abbildung 103: | Empfundene Exposition nach Quelle kategorisiert in 3 Expositionsgruppen in Prozent.....                                                                            | 171 |
| Abbildung 104: | Extremgruppenvergleich <i>highly exposed</i> nach Quelle in Prozent.....                                                                                           | 171 |

|                |                                                                                                                                                                                                   |     |
|----------------|---------------------------------------------------------------------------------------------------------------------------------------------------------------------------------------------------|-----|
| Abbildung 105: | Empfundene Lärmexposition und Verkehrslärmbelastung nach Quelle 24h- ( $L_{den}$ ) und Nachtzeitraum ( $L_n$ ) gruppiert im Mittelwertvergleich (aufsteigend sortiert) .....                      | 172 |
| Abbildung 106: | Empfundene Lärmexposition und Lärmbelastung durch Straßen- und Flugverkehr im 24h- ( $L_{den}$ ) und Nachtzeitraum ( $L_n$ ) in 10dB-Schritten im Mittelwertvergleich (absteigend sortiert) ..... | 172 |
| Abbildung 107: | Empfundene Lärmexposition und Schienenverkehrslärmbelastung im 24h- ( $L_{den}$ ) und Nachtzeitraum ( $L_n$ ) in 10dB-Schritten im Mittelwertvergleich.....                                       | 173 |
| Abbildung 108: | Empfundene Lärmexposition insgesamt in Prozent.....                                                                                                                                               | 173 |
| Abbildung 109: | Empfundene Lärmexposition insgesamt und Katastralgemeinden im Mittelwertvergleich .....                                                                                                           | 174 |
| Abbildung 110: | Empfundene Lärmexposition insgesamt und Belästigung durch Lärm insgesamt im Mittelwertvergleich.....                                                                                              | 176 |
| Abbildung 111: | Empfundene Flugverkehrslärmexposition in Prozent.....                                                                                                                                             | 177 |
| Abbildung 112: | Empfundene Flugverkehrslärmexposition und 24h-Fluglärmbelastung $L_{den}$ in 10dB-Schritten im Mittelwertvergleich.....                                                                           | 178 |
| Abbildung 113: | Empfundene Flugverkehrslärmexposition und nächtliche Fluglärmbelastung $L_n$ in 10dB-Schritten im Mittelwertvergleich.....                                                                        | 178 |
| Abbildung 114: | Empfundene Fluglärmexposition und Katastralgemeinden im Mittelwertvergleich .....                                                                                                                 | 178 |
| Abbildung 115: | Empfundene Straßenverkehrslärmexposition in Prozent .....                                                                                                                                         | 180 |
| Abbildung 116: | Empfundene Straßenverkehrslärmexposition und 24h-Straßenverkehrslärmbelastung $L_{den}$ in 10dB-Schritten im Mittelwertvergleich.....                                                             | 181 |
| Abbildung 117: | Empfundene Straßenverkehrslärmexposition und nächtliche Straßenverkehrslärmbelastung $L_n$ in 10dB-Schritten im Mittelwertvergleich .....                                                         | 182 |
| Abbildung 118: | Empfundene Straßenlärmexposition und Katastralgemeinden im Mittelwertvergleich .....                                                                                                              | 182 |
| Abbildung 119: | Empfundene Straßenverkehrslärmexposition und Belästigung durch Straßenverkehrslärm im Mittelwertvergleich.....                                                                                    | 183 |
| Abbildung 120: | Empfundene Baustellenlärmexposition in Prozent .....                                                                                                                                              | 184 |
| Abbildung 121: | Empfundene Baustellenlärmexposition und Katastralgemeinden im Mittelwertvergleich .....                                                                                                           | 185 |
| Abbildung 122: | Empfundene Nachbarschaftslärmexposition in Prozent.....                                                                                                                                           | 187 |
| Abbildung 123: | Empfundene Nachbarschaftslärmexposition und Katastralgemeinden im Mittelwertvergleich .....                                                                                                       | 188 |
| Abbildung 124: | Empfundene Nachbarschaftslärmexposition und Güte der Nachbarschaftsbeziehungen im Mittelwertvergleich.....                                                                                        | 190 |
| Abbildung 125: | Empfundene Lärmexposition durch Passanten und Gaststätten in Prozent.....                                                                                                                         | 190 |
| Abbildung 126: | Empfundene Lärmexposition durch Passanten und Gaststätten und Katastralgemeinden im Mittelwertvergleich.....                                                                                      | 191 |
| Abbildung 127: | Empfundene Exposition gegenüber Erschütterungen in Prozent .....                                                                                                                                  | 193 |
| Abbildung 128: | Empfundene Erschütterungsexposition und Katastralgemeinden im Mittelwertvergleich.....                                                                                                            | 194 |
| Abbildung 129: | Empfundene Schienenverkehrslärmexposition in Prozent .....                                                                                                                                        | 196 |
| Abbildung 130: | Empfundene Schienenverkehrslärmexposition und 24h-Schienenverkehrslärmbelastung $L_{den}$ in 10dB-Schritten im Mittelwertvergleich.....                                                           | 196 |
| Abbildung 131: | Empfundene Schienenverkehrslärmexposition und nächtliche Schienenverkehrslärmbelastung $L_n$ in 10dB-Schritten im Mittelwertvergleich.....                                                        | 197 |
| Abbildung 132: | Empfundene Schienenverkehrslärmexposition und Katastralgemeinden im Mittelwertvergleich.....                                                                                                      | 197 |
| Abbildung 133: | Empfundene Autobahnlärmexposition in Prozent.....                                                                                                                                                 | 199 |
| Abbildung 134: | Empfundene Autobahnlärmexposition und Katastralgemeinden im Mittelwertvergleich .....                                                                                                             | 200 |
| Abbildung 135: | Empfundene Lärmexposition durch Gewerbe und Industrie in Prozent .....                                                                                                                            | 201 |

|                |                                                                                                                                         |     |
|----------------|-----------------------------------------------------------------------------------------------------------------------------------------|-----|
| Abbildung 136: | Empfundene Lärmexposition durch Gewerbe und Industrie und Katastralgemeinden im Mittelwertvergleich.....                                | 202 |
| Abbildung 137: | Mittelwertvergleich der Belästigung nach Quelle .....                                                                                   | 204 |
| Abbildung 138: | Belästigung nach Quelle kategorisiert in 3 Expositionsgruppen in Prozent .....                                                          | 205 |
| Abbildung 139: | Extremgruppenvergleich <i>highly annoyed</i> nach Quelle in Prozent.....                                                                | 205 |
| Abbildung 140: | Belästigung und Verkehrslärmbelastung nach Quelle 24h-Pegel ( $L_{den}$ ) gruppiert im Mittelwertvergleich.....                         | 206 |
| Abbildung 141: | Belästigung und Verkehrslärmbelastung nach Quelle 24h-Pegel ( $L_{den}$ ) in 10dB-Schritten im Mittelwertvergleich.....                 | 206 |
| Abbildung 142: | Belästigung nach Lärmquelle und Katastralgemeinde im Mittelwertvergleich .....                                                          | 207 |
| Abbildung 143: | Belästigung nach Verkehrslärmquelle und Katastralgemeinde im Mittelwertvergleich.....                                                   | 209 |
| Abbildung 144: | Belästigung nach nicht verkehrsverursachten Lärmquellen und Katastralgemeinde im Mittelwertvergleich.....                               | 209 |
| Abbildung 145: | Belästigung durch Lärm insgesamt in Prozent .....                                                                                       | 210 |
| Abbildung 146: | Belästigung durch Lärm insgesamt und Katastralgemeinden im Mittelwertvergleich.....                                                     | 211 |
| Abbildung 147: | Belästigung durch Lärm insgesamt und baulicher Schutz vor Verkehrslärm im Extremgruppenvergleich in Prozent.....                        | 211 |
| Abbildung 148: | Zufriedenheit mit der eigenen Wohnsituation und Belästigung durch Lärm insgesamt im Mittelwertvergleich.....                            | 212 |
| Abbildung 149: | Lärmempfindlichkeit und Belästigung durch Lärm insgesamt im Mittelwertvergleich.....                                                    | 213 |
| Abbildung 150: | Belästigung durch Flugverkehrslärm in Prozent .....                                                                                     | 215 |
| Abbildung 151: | Fluglärmbelästigung, –Expositionsempfinden und 24h-Fluglärmbelastung $L_{den}$ in 10dB-Schritten im Mittelwertvergleich .....           | 216 |
| Abbildung 152: | Fluglärmbelästigung und Katastralgemeinden im Mittelwertvergleich.....                                                                  | 216 |
| Abbildung 153: | Wohnbedingungen und Belästigung durch Fluglärm im Extremgruppenvergleich.....                                                           | 217 |
| Abbildung 154: | Lärmempfindlichkeit und Belästigung durch Fluglärm im Mittelwertvergleich.....                                                          | 217 |
| Abbildung 155: | Belästigung durch Strassenverkehrslärm in Prozent .....                                                                                 | 219 |
| Abbildung 156: | Straßenlärmbelästigung und –Expositionsempfinden und 24h-Straßenlärmbelastung $L_{den}$ in 10dB-Schritten im Mittelwertvergleich.....   | 220 |
| Abbildung 157: | Straßenlärmbelästigung und Katastralgemeinden im Mittelwertvergleich .....                                                              | 220 |
| Abbildung 158: | Belästigung durch Straßenverkehrslärm und baulicher Schutz vor Verkehrslärm im Extremgruppenvergleich in Prozent.....                   | 221 |
| Abbildung 159: | Lebensbedingungen (Summenscore) und Belästigung durch Straßenverkehrslärm im Mittelwertvergleich.....                                   | 222 |
| Abbildung 160: | Belästigung durch Baustellenlärm in Prozent.....                                                                                        | 224 |
| Abbildung 161: | Belästigung durch Baustellenlärm und Katastralgemeinden im Mittelwertvergleich.....                                                     | 224 |
| Abbildung 162: | Belästigung durch Nachbarschaftslärm in Prozent .....                                                                                   | 226 |
| Abbildung 163: | Nachbarschaftslärmbelästigung und Katastralgemeinden im Mittelwertvergleich.....                                                        | 227 |
| Abbildung 164: | Zufriedenheit mit der eigenen Wohnsituation und Belästigung durch Nachbarschaftslärm im Mittelwertvergleich.....                        | 228 |
| Abbildung 165: | Belästigung durch Lärm von Passanten und Gaststätten in Prozent .....                                                                   | 229 |
| Abbildung 166: | Lärmbelästigung Passanten / Gaststätten und Katastralgemeinden im Mittelwertvergleich....                                               | 230 |
| Abbildung 167: | Belästigung durch Schienenverkehrslärm in Prozent .....                                                                                 | 232 |
| Abbildung 168: | Schienenlärmbelästigung und –Expositionsempfinden und 24h-Schienenlärmbelastung $L_{den}$ in 10dB-Schritten im Mittelwertvergleich..... | 233 |
| Abbildung 169: | Schienenverkehrslärmbelästigung und Katastralgemeinden im Mittelwertvergleich .....                                                     | 233 |

|                |                                                                                                                                                                                   |     |
|----------------|-----------------------------------------------------------------------------------------------------------------------------------------------------------------------------------|-----|
| Abbildung 170: | Güte der Wohnbedingungen und Belästigung durch Schienenverkehrslärm nach 24h-Schienenlärmbelastung $L_{den}$ in 10dB-Schritten im Mittelwertvergleich.....                        | 234 |
| Abbildung 171: | Belästigung durch Erschütterungen in Prozent .....                                                                                                                                | 236 |
| Abbildung 172: | Belästigung durch Erschütterungen und Katastralgemeinden im Mittelwertvergleich .....                                                                                             | 236 |
| Abbildung 173: | Belästigung durch Lärm aus Gewerbe und Industrie in Prozent.....                                                                                                                  | 238 |
| Abbildung 174: | Lärmbelästigung Gewerbe und Industrie und Katastralgemeinden im Mittelwertvergleich.....                                                                                          | 239 |
| Abbildung 175: | Belästigung durch Autobahnlärm in Prozent .....                                                                                                                                   | 241 |
| Abbildung 176: | Autobahnlärmbelastung und –Expositionsempfinden und 24h-Autobahnlärmbelastung $L_{den}$ in 10dB-Schritten im Mittelwertvergleich.....                                             | 242 |
| Abbildung 177: | Belästigung durch Autobahnlärm und Katastralgemeinden im Mittelwertvergleich .....                                                                                                | 243 |
| Abbildung 178: | Mittelwertvergleich der Belästigung im Schlaf nach Quelle .....                                                                                                                   | 245 |
| Abbildung 179: | Belästigung im Schlaf nach Quelle kategorisiert in 3 Expositionsgruppen in Prozent.....                                                                                           | 246 |
| Abbildung 180: | Extremgruppenvergleich <i>highly annoyed sleep</i> nach Quelle in Prozent.....                                                                                                    | 246 |
| Abbildung 181: | Belästigung im Schlaf und Verkehrslärmbelastung nach Quelle Nachtlärmpegel ( $L_n$ ) gruppiert im Mittelwertvergleich.....                                                        | 247 |
| Abbildung 182: | Belästigung im Schlaf und Verkehrslärmbelastung nach Quelle Nachtlärmpegel ( $L_n$ ) in 10dB-Schritten im Mittelwertvergleich.....                                                | 247 |
| Abbildung 183: | Belästigung im Schlaf nach Lärmquelle und Katastralgemeinde im Mittelwertvergleich .....                                                                                          | 248 |
| Abbildung 184: | Belästigung im Schlaf nach Verkehrslärmquelle und Katastralgemeinde im Mittelwertvergleich.....                                                                                   | 249 |
| Abbildung 185: | Belästigung im Schlaf nach nicht verkehrsverursachten Lärmquellen und Katastralgemeinde im Mittelwertvergleich.....                                                               | 250 |
| Abbildung 186: | Belästigung durch Lärm im Schlaf insgesamt in Prozent .....                                                                                                                       | 251 |
| Abbildung 187: | Belästigung im Schlaf durch Lärm insgesamt und Katastralgemeinden im Mittelwertvergleich.....                                                                                     | 251 |
| Abbildung 188: | Belästigung im Schlaf durch Lärm insgesamt nach Geschlecht (anteilig) .....                                                                                                       | 252 |
| Abbildung 189: | Belästigung im Schlaf durch Lärm insgesamt und baulicher Schutz vor Verkehrslärm im Extremgruppenvergleich in Prozent.....                                                        | 253 |
| Abbildung 190: | Güte der eigenen Wohnbedingungen und Belästigung im Schlaf durch Lärm insgesamt im Mittelwertvergleich.....                                                                       | 253 |
| Abbildung 191: | Lebensqualität und Belästigung im Schlaf durch Lärm insgesamt im Mittelwertvergleich .....                                                                                        | 254 |
| Abbildung 192: | Belästigung durch Straßenverkehrslärm im Schlaf in Prozent.....                                                                                                                   | 256 |
| Abbildung 193: | Straßenlärmbelastung im Schlaf und nächtliche Straßenlärmbelastung $L_n$ in 10dB-Schritten im Mittelwertvergleich.....                                                            | 257 |
| Abbildung 194: | Straßenlärmbelastung im Schlaf und Katastralgemeinden im Mittelwertvergleich .....                                                                                                | 257 |
| Abbildung 195: | Belästigung im Schlaf durch Straßenverkehrslärm und baulicher Schutz vor Verkehrslärm im Extremgruppenvergleich in Prozent.....                                                   | 258 |
| Abbildung 196: | Einschätzung des Lärmniveaus in Innsbruck im Vergleich zu anderen Städten Österreichs und Belästigung im Schlaf durch Straßenverkehrslärm im Mittelwertvergleich .....            | 258 |
| Abbildung 197: | Einschätzung der Sicherheit und Belästigung im Schlaf durch Straßenverkehrslärm nach nächtlicher Straßenverkehrslärmbelastung $L_n$ in 10dB-Schritten im Mittelwertvergleich..... | 259 |
| Abbildung 198: | Belästigung durch Lärm von Passanten und Gaststätten im Schlaf in Prozent .....                                                                                                   | 261 |
| Abbildung 199: | Lärmbelästigung im Schlaf durch Passanten und Gaststätten und Katastralgemeinden im Mittelwertvergleich.....                                                                      | 261 |
| Abbildung 200: | Belästigung im Schlaf durch Lärm von Passanten und Gaststätten und Verbundenheit zur Stadt Innsbruck im Extremgruppenvergleich in Prozent .....                                   | 262 |
| Abbildung 201: | Belästigung durch Nachbarschaftslärm im Schlaf in Prozent .....                                                                                                                   | 264 |

|                |                                                                                                                                                                                |     |
|----------------|--------------------------------------------------------------------------------------------------------------------------------------------------------------------------------|-----|
| Abbildung 202: | Nachbarschaftslärmbelästigung im Schlaf und Katastralgemeinden im Mittelwertvergleich....                                                                                      | 265 |
| Abbildung 203: | Zufriedenheit mit der eigenen Wohnsituation insgesamt und Belästigung im Schlaf durch<br>Nachbarschaftslärm im Mittelwertvergleich.....                                        | 265 |
| Abbildung 204: | Belästigung im Schlaf durch Flugverkehrslärm in Prozent .....                                                                                                                  | 267 |
| Abbildung 205: | Fluglärmelastung im Schlaf und nächtliche Fluglärmelastung $L_n$ in 10dB-Schritten im<br>Mittelwertvergleich.....                                                              | 268 |
| Abbildung 206: | Fluglärmelastung im Schlaf und Katastralgemeinden im Mittelwertvergleich.....                                                                                                  | 268 |
| Abbildung 207: | Belästigung durch Baustellenlärm im Schlaf in Prozent.....                                                                                                                     | 271 |
| Abbildung 208: | Belästigung im Schlaf durch Baulärm und Katastralgemeinden im Mittelwertvergleich .....                                                                                        | 271 |
| Abbildung 209: | Belästigung durch Schienenverkehrslärm im Schlaf in Prozent.....                                                                                                               | 273 |
| Abbildung 210: | Schienenlärmelastung im Schlaf und nächtliche Schienenlärmelastung $L_n$ in 10dB-Schritten<br>im Mittelwertvergleich .....                                                     | 274 |
| Abbildung 211: | Schienenlärmelastung im Schlaf und Katastralgemeinden im Mittelwertvergleich .....                                                                                             | 275 |
| Abbildung 212: | Belästigung durch Erschütterungen im Schlaf in Prozent .....                                                                                                                   | 277 |
| Abbildung 213: | Belästigung im Schlaf durch Erschütterungen und Katastralgemeinden im<br>Mittelwertvergleich.....                                                                              | 277 |
| Abbildung 214: | Belästigung im Schlaf durch Lärm von Gewerbe und Industrie in Prozent.....                                                                                                     | 280 |
| Abbildung 215: | Belästigung im Schlaf durch Lärm von Gewerbe und Industrie und Katastralgemeinden im<br>Mittelwertvergleich.....                                                               | 280 |
| Abbildung 216: | Belästigung durch Autobahnlärm im Schlaf in Prozent .....                                                                                                                      | 283 |
| Abbildung 217: | Autobahnlärmelastung und und nächtliche Autobahnlärmelastung $L_n$ in 10dB-Schritten im<br>Mittelwertvergleich.....                                                            | 283 |
| Abbildung 218: | Belästigung im Schlaf durch Autobahnlärm und Katastralgemeinden im Mittelwertvergleich ..                                                                                      | 284 |
| Abbildung 219: | Lärmcopingreaktionen im Vergleich in Prozent (nach Häufigkeit absteigend sortiert) .....                                                                                       | 287 |
| Abbildung 220: | Summenscore Lärmcoping in Prozent.....                                                                                                                                         | 288 |
| Abbildung 221: | Instrumentelles Lärmcoping in Prozent.....                                                                                                                                     | 288 |
| Abbildung 222: | Instrumentelles Lärmcoping und baulicher Schutz vor Verkehrslärm (gruppiert).....                                                                                              | 289 |
| Abbildung 223: | Emotionales Lärmcoping in Prozent .....                                                                                                                                        | 289 |
| Abbildung 224: | Ärger über Verkehrslärm und 24h-Lärmelastung $L_{den}$ nach Quelle in 10dB-Schritten im<br>Mittelwertvergleich.....                                                            | 290 |
| Abbildung 225: | Emotionales Lärmcoping und Lärmempfindlichkeit (gruppiert).....                                                                                                                | 291 |
| Abbildung 226: | Politisches Lärmcoping in Prozent.....                                                                                                                                         | 292 |
| Abbildung 227: | Summenscore Lärmcoping und 24h-Lärmelastung $L_{den}$ nach Quelle in 10dB-Schritten im<br>Mittelwertvergleich.....                                                             | 294 |
| Abbildung 228: | Summenscore Lärmcoping und Belästigung durch Lärm gesamt im Mittelwertvergleich.....                                                                                           | 295 |
| Abbildung 229: | Summenscore Lärmcoping und Belästigung durch Lärm gesamt im Schlaf im<br>Mittelwertvergleich.....                                                                              | 297 |
| Abbildung 230: | Empfundene Zu- und Abnahme der Lärmelastung in Prozent.....                                                                                                                    | 298 |
| Abbildung 231: | Empfundene Zunahme der Lärmelastung und Belästigung durch Lärm insgesamt im<br>Mittelwertvergleich.....                                                                        | 300 |
| Abbildung 232: | Einschätzung der negativen Wirkung von Lärm auf die Gesundheit in Prozent .....                                                                                                | 302 |
| Abbildung 233: | Einschätzung der negativen Wirkung von Lärm auf die Gesundheit und höchster erreichter<br>Schulabschluss (gruppiert, ohne Antwortkategorie w.n. / k.A.).....                   | 303 |
| Abbildung 234: | Einschätzung der negativen Wirkung von Lärm auf die Gesundheit und Notwendigkeit (weiterer<br>Maßnahmen) zur Lärmreduktion (gruppiert, ohne Antwortkategorie w.n. / k.A.)..... | 304 |
| Abbildung 235: | Bekanntheit der Umgebungslärmkarten in Prozent .....                                                                                                                           | 305 |

|                |                                                                                                                                           |     |
|----------------|-------------------------------------------------------------------------------------------------------------------------------------------|-----|
| Abbildung 236: | Einschätzung des Lärmniveaus im Städtevergleich in Prozent .....                                                                          | 306 |
| Abbildung 237: | Einschätzung des Lärmniveaus und Lärmempfindlichkeit im Mittelwertvergleich .....                                                         | 307 |
| Abbildung 238: | Einschätzung des Lärmniveaus und Belästigung durch Lärm gesamt und Lärm gesamt im Schlaf (gruppiert) .....                                | 308 |
| Abbildung 239: | Einschätzung des eigenen Lärmbeitrags in Prozent .....                                                                                    | 310 |
| Abbildung 240: | Einschätzung des eigenen Lärmbeitrags und vorrangiges Verkehrsmittel im Mittelwertvergleich .....                                         | 312 |
| Abbildung 241: | Eigener Lärmbeitrag durchschnittlich bis groß und Mobilitätsverhalten im Extremgruppenvergleich in Prozent .....                          | 312 |
| Abbildung 242: | Einschätzung der störendsten Lärmquelle in Innsbruck in Prozent .....                                                                     | 313 |
| Abbildung 243: | Einschätzung der störendsten Lärmquelle und Bildungsschicht (gruppiert) .....                                                             | 314 |
| Abbildung 244: | Einschätzung der störendsten Lärmquelle und Lärmbelastung nach Quelle im Extremgruppenvergleich der Starkbelasteten .....                 | 316 |
| Abbildung 245: | Einschätzung der störendsten Lärmquelle in Innsbruck und Lärmbelästigung nach Quelle im Extremgruppenvergleich der Starkbelästigten ..... | 317 |
| Abbildung 246: | Sinnhaftigkeit (weiterer) Maßnahmen zur Lärmreduktion in Prozent .....                                                                    | 319 |
| Abbildung 247: | Sinnhaftigkeit von Maßnahmen zur Lärmreduktion und Lärmniveau von Innsbruck im Städtevergleich .....                                      | 320 |
| Abbildung 248: | Sinnhaftigkeit von Maßnahmen zur Lärmreduktion und Lärmempfindlichkeit im Mittelwertvergleich .....                                       | 320 |
| Abbildung 249: | Sinnhaftigkeit von Maßnahmen zur Lärmreduktion und Lärmbelästigung gesamt und im Schlaf (gruppiert) im Vergleich .....                    | 322 |
| Abbildung 250: | Sinnhaftigkeit von Maßnahmen zur Lärmreduktion und Mittelwerte der Lärmbelästigung (alle Quellen) in Prozent .....                        | 323 |
| Abbildung 251: | Befürwortung von Einzelmaßnahmen zur Lärmreduktion in Innsbruck in Prozent .....                                                          | 324 |

# ANHANG

## Anhang 1: Deskriptive Statistik der Befragungen

| Deskriptive Statistik                                                                 | N    | Minimum  | Maximum  | Summe       | Mittelwert  | Standardfehler | Standardabweichung |
|---------------------------------------------------------------------------------------|------|----------|----------|-------------|-------------|----------------|--------------------|
| Gebäude-ID                                                                            | 1031 | 11244035 | 11264636 | 11607588143 | 11258572,40 | 113,164        | 3633,608           |
| Anzahl Einwohner laut ZMR                                                             | 1031 | 1        | 216      | 18268       | 17,72       | ,651           | 20,895             |
| Anzahl Wohnungen laut ZMR                                                             | 1031 | 1        | 105      | 10174       | 9,87        | ,371           | 11,919             |
| Lärmquellensamplezugehörigkeit                                                        | 1031 | 1,00     | 9,00     | 5171,00     | 5,0155      | ,08022         | 2,57579            |
| Straßenlärm 24h                                                                       | 1031 | 24,90    | 72,00    | 56833,60    | 55,1247     | ,23189         | 7,44587            |
| Straßenlärm Nacht                                                                     | 1031 | 15,30    | 63,30    | 46996,60    | 45,5835     | ,23237         | 7,46123            |
| Autobahnlärm 24h                                                                      | 1031 | 30,30    | 65,70    | 45751,20    | 44,3756     | ,18708         | 6,00688            |
| Autobahnlärm Nacht                                                                    | 1031 | 21,20    | 56,70    | 36289,00    | 35,1979     | ,18599         | 5,97197            |
| Schienenlärm 24h                                                                      | 1031 | 20,70    | 69,00    | 46163,70    | 44,7757     | ,23758         | 7,62842            |
| Schienenlärm Nacht                                                                    | 1031 | 10,60    | 62,70    | 39207,90    | 38,0290     | ,23513         | 7,54968            |
| Fluglärm 24h                                                                          | 1031 | 30,50    | 66,40    | 45984,70    | 44,6020     | ,21712         | 6,97139            |
| Fluglärm Nacht                                                                        | 1031 | 7,50     | 47,70    | 28082,20    | 27,2378     | ,23247         | 7,46429            |
| Geschlecht                                                                            | 1031 | 1        | 2        | 1521        | 1,48        | ,016           | ,500               |
| Geburtsjahr                                                                           | 1031 | 1920     | 1999     | 2030252     | 1969,21     | ,587           | 18,838             |
| Alter                                                                                 | 1031 | 18,00    | 97,00    | 49272,00    | 47,7905     | ,58673         | 18,83950           |
| Altersgruppen                                                                         | 1031 | 1,00     | 3,00     | 1897,00     | 1,8400      | ,02546         | ,81764             |
| Wohnhaft seit                                                                         | 1031 | 1,0      | 86,0     | 18142,0     | 17,597      | ,5594          | 17,9618            |
| Hauptwohnsitz (Kontrollfrage)                                                         | 1031 | 1        | 1        | 1031        | 1,00        | 0,000          | 0,000              |
| Aufenthalt in Innsbruck mehr als 200 Tage im Jahr                                     | 1031 | 1        | 1        | 1031        | 1,00        | 0,000          | 0,000              |
| Art des Hauses                                                                        | 1031 | 1        | 6        | 3923        | 3,81        | ,042           | 1,352              |
| Eigentumsverhältnisse                                                                 | 1031 | 1        | 3        | 1801        | 1,75        | ,022           | ,704               |
| Haushaltsgröße                                                                        | 1031 | 1,0      | 10,0     | 2648,0      | 2,568       | ,0412          | 1,3230             |
| Anzahl Kinder unter 18 Jahren im selben Haushalt                                      | 1031 | 0        | 5        | 485         | ,47         | ,028           | ,902               |
| Stockwerk Schlafzimmer                                                                | 1031 | -2,0     | 11,0     | 1562,0      | 1,515       | ,0428          | 1,3751             |
| Schutz vor Verkehrslärm durch bauliche Abschirmungen (Gebäude, Mauern, Innenhöfe,...) | 1031 | 1        | 5        | 1943        | 1,88        | ,031           | 1,002              |
| Schutz vor Verkehrslärm durch geschützten Innenhof bzw. lärmabgewandte Seite          | 1031 | 1        | 3        | 1383        | 1,34        | ,016           | ,517               |
| Nachtschlaf bei geöffneten oder gekippten Fenstern                                    | 1031 | 1        | 6        | 2105        | 2,04        | ,044           | 1,415              |
| Lärmschutzfenster in den letzten 10 Jahren eingebaut                                  | 1031 | 1        | 3        | 2047        | 1,99        | ,018           | ,590               |
| Schutz Lärmschutzfenster vor welcher Lärmquelle                                       | 1031 | 1,00     | 6,00     | 5585,00     | 5,4171      | ,04166         | 1,33753            |
| Ausgesetztheit Lärm gesamt                                                            | 1031 | 0        | 10       | 4443        | 4,31        | ,080           | 2,571              |
| Ausgesetztheit Autobahnlärm                                                           | 1031 | 0        | 10       | 683         | ,66         | ,053           | 1,711              |
| Ausgesetztheit Strassenverkehrslärm                                                   | 1031 | 0        | 10       | 3834        | 3,72        | ,091           | 2,921              |
| Ausgesetztheit Schienenverkehrslärm                                                   | 1031 | 0        | 10       | 1157        | 1,12        | ,069           | 2,208              |
| Ausgesetztheit Flugverkehrslärm                                                       | 1031 | 0        | 10       | 3987        | 3,87        | ,092           | 2,943              |
| Ausgesetztheit Lärm von Gewerbe und Industrie                                         | 1031 | 0        | 10       | 671         | ,65         | ,054           | 1,735              |
| Ausgesetztheit Lärm von Passanten u. Gaststätten                                      | 1031 | 0        | 10       | 1974        | 1,91        | ,082           | 2,622              |
| Ausgesetztheit Lärm von Baustellen                                                    | 1031 | 0        | 10       | 2473        | 2,40        | ,096           | 3,074              |



|                                                           |      |   |    |      |      |      |        |
|-----------------------------------------------------------|------|---|----|------|------|------|--------|
| Ausgesetztheit Nachbarschaftslärm                         | 1031 | 0 | 10 | 2147 | 2,08 | ,080 | 2,581  |
| Ausgesetztheit Erschütterungen gesamt                     | 1031 | 0 | 10 | 1422 | 1,38 | ,074 | 2,380  |
| Ausmass Windeinfluss auf Lärm                             | 1031 | 1 | 5  | 2302 | 2,23 | ,032 | 1,030  |
| Güte Wohnbedingungen                                      | 1031 | 0 | 99 | 6703 | 6,50 | ,149 | 4,779  |
| Güte Nachbarschaftsbeziehungen                            | 1031 | 0 | 99 | 7946 | 7,71 | ,331 | 10,623 |
| Güte Sicherheit                                           | 1031 | 0 | 99 | 6532 | 6,34 | ,121 | 3,876  |
| Güte Landschaft, Natur, öffentliche Parks und Grünflächen | 1031 | 0 | 99 | 8010 | 7,77 | ,230 | 7,375  |
| Güte Luftqualität                                         | 1031 | 0 | 99 | 6329 | 6,14 | ,118 | 3,788  |
| Güte öffentliche Verkehrsverbindungen                     | 1031 | 0 | 99 | 9028 | 8,76 | ,312 | 10,020 |
| Güte Bedingungen für Kinder                               | 1031 | 0 | 99 | 9089 | 8,82 | ,421 | 13,507 |
| Ausmaß Verbundenheit zur Stadt Innsbruck                  | 1031 | 0 | 99 | 7818 | 7,58 | ,146 | 4,693  |
| Ausmaß Zufriedenheit eigene Wohnsituation insgesamt       | 1031 | 0 | 99 | 8453 | 8,20 | ,110 | 3,527  |
| Güte eigene Lebensqualität                                | 1031 | 0 | 99 | 8825 | 8,56 | ,222 | 7,141  |
| Ausmass eigene Lärmempfindlichkeit                        | 1031 | 0 | 10 | 4606 | 4,47 | ,084 | 2,700  |
| Güte eigener Gesundheitszustand                           | 1031 | 1 | 99 | 2290 | 2,22 | ,136 | 4,383  |
| Belästigung Lärm gesamt                                   | 1031 | 0 | 10 | 4013 | 3,89 | ,086 | 2,771  |
| Belästigung Autobahnlärm                                  | 1031 | 0 | 10 | 615  | ,60  | ,053 | 1,702  |
| Belästigung Strassenverkehrslärm                          | 1031 | 0 | 10 | 3195 | 3,10 | ,090 | 2,893  |
| Belästigung Schienenverkehrslärm                          | 1031 | 0 | 10 | 1158 | 1,12 | ,067 | 2,151  |
| Belästigung Fluglärm                                      | 1031 | 0 | 10 | 3262 | 3,16 | ,089 | 2,868  |
| Belästigung Lärm aus Gewerbe u. Industrie                 | 1031 | 0 | 10 | 649  | ,63  | ,052 | 1,672  |
| Belästigung Lärm von Passanten und Gaststätten            | 1031 | 0 | 10 | 1764 | 1,71 | ,077 | 2,473  |
| Belästigung Baustellenlärm                                | 1031 | 0 | 99 | 2450 | 2,38 | ,132 | 4,254  |
| Belästigung Nachbarschaftslärm                            | 1031 | 0 | 10 | 1868 | 1,81 | ,077 | 2,457  |
| Belästigung Erschütterungen gesamt                        | 1031 | 0 | 10 | 1121 | 1,09 | ,068 | 2,171  |
| Belästigung im Schlaf Lärm gesamt                         | 1031 | 0 | 10 | 2225 | 2,16 | ,086 | 2,755  |
| Belästigung im Schlaf Autobahnlärm                        | 1031 | 0 | 10 | 295  | ,29  | ,039 | 1,238  |
| Belästigung im Schlaf Straßenverkehrslärm                 | 1031 | 0 | 10 | 1633 | 1,58 | ,078 | 2,519  |
| Belästigung im Schlaf Schienenverkehrslärm                | 1031 | 0 | 10 | 637  | ,62  | ,054 | 1,725  |
| Belästigung im Schlaf Fluglärm                            | 1031 | 0 | 10 | 1121 | 1,09 | ,070 | 2,232  |
| Belästigung im Schlaf Lärm von Gewerbe und Industrie      | 1031 | 0 | 10 | 356  | ,35  | ,042 | 1,348  |
| Belästigung im Schlaf Lärm von Passanten und Gaststätten  | 1031 | 0 | 10 | 1401 | 1,36 | ,077 | 2,475  |
| Belästigung im Schlaf Lärm von Baustellen                 | 1031 | 0 | 99 | 853  | ,83  | ,112 | 3,609  |
| Belästigung im Schlaf Nachbarschaftslärm                  | 1031 | 0 | 10 | 1300 | 1,26 | ,073 | 2,337  |
| Belästigung im Schlaf Erschütterungen gesamt              | 1031 | 0 | 10 | 542  | ,53  | ,047 | 1,523  |
| Lärmcoping: Fenster im Sommer nachts geschlossen          | 1031 | 1 | 2  | 1590 | 1,54 | ,016 | ,498   |
| Lärmcoping: Garten/Balkon nicht genutzt                   | 1031 | 1 | 99 | 1941 | 1,88 | ,095 | 3,055  |
| Lärmcoping: Andere Nutzung Wohnräume                      | 1031 | 1 | 2  | 1903 | 1,85 | ,011 | ,361   |
| Lärmcoping: Ärger über Verkehrslärm                       | 1031 | 1 | 2  | 1494 | 1,45 | ,015 | ,498   |
| Lärmcoping: Hilflosigkeit wegen Verkehrslärm              | 1031 | 1 | 2  | 1816 | 1,76 | ,013 | ,426   |
| Lärmcoping: Gefühlte Zunahme Lärmbelastung                | 1031 | 1 | 2  | 1626 | 1,58 | ,015 | ,494   |
| Lärmcoping: Gefühlte Abnahme Lärmbelastung                | 1031 | 1 | 2  | 2004 | 1,94 | ,007 | ,231   |
| Lärmcoping: Gespräche mit Nachbarn über Lärm              | 1031 | 1 | 2  | 1708 | 1,66 | ,015 | ,475   |
| Lärmcoping: Gespräche mit Behörden über Lärm              | 1031 | 1 | 2  | 1928 | 1,87 | ,010 | ,336   |

|                                                                              |      |   |    |      |      |      |        |
|------------------------------------------------------------------------------|------|---|----|------|------|------|--------|
| Derzeitige berufliche Stellung                                               | 1031 | 1 | 11 | 5630 | 5,46 | ,114 | 3,655  |
| Höchster bisher erreichter Bildungsabschluss                                 | 1031 | 1 | 99 | 4057 | 3,94 | ,166 | 5,317  |
| Arbeits- oder Ausbildungsplatz in Innsbruck                                  | 1031 | 1 | 99 | 1945 | 1,89 | ,099 | 3,167  |
| Vorrangiges Verkehrsmittel auf dem Weg zum Arbeits- oder Ausbildungsplatz    | 1031 | 1 | 6  | 4160 | 4,03 | ,058 | 1,864  |
| Häufigkeit Nutzung eines Autos als Fahrer/in                                 | 1031 | 1 | 5  | 2968 | 2,88 | ,048 | 1,540  |
| Häufigkeit Nutzung öffentl. Verkehrsmittel innerhalb der Stadt               | 1031 | 1 | 99 | 3291 | 3,19 | ,103 | 3,322  |
| Häufigkeit Nutzung der Eisenbahn oder von Autobussen außerhalb der Stadt     | 1031 | 1 | 99 | 4392 | 4,26 | ,096 | 3,096  |
| Häufigkeit Nutzung eines Fahrrads                                            | 1031 | 1 | 5  | 3088 | 3,00 | ,052 | 1,669  |
| Häufigkeit länger als 10 Minuten zu Fuß gehen                                | 1031 | 1 | 5  | 1654 | 1,60 | ,029 | ,941   |
| Häufigkeit Nutzung eines Flugzeuges                                          | 1031 | 1 | 5  | 3969 | 3,85 | ,023 | ,727   |
| Einschätzung des Ausmaßes negativer Auswirkungen von Lärm auf die Gesundheit | 1031 | 1 | 5  | 3226 | 3,13 | ,028 | ,909   |
| Bekanntheitsgrad Umgebungslärmkarten                                         | 1031 | 1 | 2  | 1841 | 1,79 | ,013 | ,411   |
| Lautheit Gesamtlärm in Innsbruck im Vergleich zu anderen Städten Österreichs | 1031 | 1 | 99 | 4312 | 4,18 | ,347 | 11,157 |
| Einschätzung eigener Beitrag zur Gesamtlärmbelastung in Innsbruck            | 1031 | 1 | 5  | 1974 | 1,91 | ,026 | ,850   |
| Einschätzung störendste Lärmquelle insgesamt                                 | 1031 | 1 | 8  | 3527 | 3,42 | ,074 | 2,379  |
| Notwendigkeit (weiterer) Maßnahmen zur Lärmreduktion in Innsbruck            | 1031 | 1 | 3  | 1519 | 1,47 | ,023 | ,733   |
| Förderung lärmarmer Verkehrsmittel, Maschinen usw.                           | 691  | 1 | 99 | 1752 | 2,54 | ,445 | 11,702 |
| Strengere Vorschriften und Auflagen für Lärmverursacher                      | 691  | 1 | 99 | 1547 | 2,24 | ,373 | 9,805  |
| Förderung von Lärmschutzmaßnahmen                                            | 691  | 1 | 99 | 2062 | 2,98 | ,506 | 13,310 |
| Strengere Kontrollen der Einhaltung von Lärmgrenzwerten                      | 691  | 1 | 99 | 2492 | 3,61 | ,577 | 15,166 |
| Bewusstseinsbildung zur Lärmvermeidung                                       | 691  | 1 | 99 | 1680 | 2,43 | ,423 | 11,107 |
| Verkehrsbeschränkungen                                                       | 691  | 0 | 99 | 2659 | 3,85 | ,576 | 15,131 |
| Finanzielle Auflagen für Lärmverursacher                                     | 691  | 0 | 99 | 2143 | 3,10 | ,486 | 12,767 |
| Schaffung, Schutz und Erhalt lärmarmer Bereiche                              | 691  | 1 | 99 | 2226 | 3,22 | ,543 | 14,281 |
| Andere Maßnahmen                                                             | 691  | 1 | 99 | 4832 | 6,99 | ,857 | 22,524 |

## Anhang 2: Häufigkeitsstatistik der Befragungen

### Katastralgemeinde

|        |           | Häufigkeit | Gültige Prozente | Kumulierte Prozente |
|--------|-----------|------------|------------------|---------------------|
| Gültig | Amras     | 60         | 5,8              | 5,8                 |
|        | Arzl      | 102        | 9,9              | 15,7                |
|        | Hötting   | 243        | 23,6             | 39,3                |
|        | Igls      | 35         | 3,4              | 42,7                |
|        | Innsbruck | 176        | 17,1             | 59,7                |
|        | Mühlau    | 50         | 4,8              | 64,6                |
|        | Pradl     | 188        | 18,2             | 82,8                |
|        | Vill      | 21         | 2,0              | 84,9                |
|        | Wilten    | 156        | 15,1             | 100,0               |
|        | Gesamt    | 1031       | 100,0            |                     |

### Lärmquellensamplezugehörigkeit

|        |                | Häufigkeit | Gültige Prozente | Kumulierte Prozente |
|--------|----------------|------------|------------------|---------------------|
| Gültig | Flug stark     | 111        | 10,8             | 10,8                |
|        | Flug mittel    | 111        | 10,8             | 21,5                |
|        | Flug gering    | 118        | 11,4             | 33,0                |
|        | Straße stark   | 118        | 11,4             | 44,4                |
|        | Straße mittel  | 119        | 11,5             | 56,0                |
|        | Straße gering  | 111        | 10,8             | 66,7                |
|        | Schiene stark  | 111        | 10,8             | 77,5                |
|        | Schiene mittel | 114        | 11,1             | 88,6                |
|        | Schiene gering | 118        | 11,4             | 100,0               |
|        | Gesamt         | 1031       | 100,0            |                     |

### Geschlecht

|        |          | Häufigkeit | Gültige Prozente | Kumulierte Prozente |
|--------|----------|------------|------------------|---------------------|
| Gültig | weiblich | 541        | 52,5             | 52,5                |
|        | männlich | 490        | 47,5             | 100,0               |
|        | Gesamt   | 1031       | 100,0            |                     |

### Altersgruppen

|        |                 | Häufigkeit | Gültige Prozente | Kumulierte Prozente |
|--------|-----------------|------------|------------------|---------------------|
| Gültig | 18 bis 40 Jahre | 440        | 42,7             | 42,7                |
|        | 41 bis 60 Jahre | 316        | 30,6             | 73,3                |
|        | über 60 Jahre   | 275        | 26,7             | 100,0               |
|        | Gesamt          | 1031       | 100,0            |                     |

### Hauptwohnsitz (Kontrollfrage)

|        |    | Häufigkeit | Gültige Prozente | Kumulierte Prozente |
|--------|----|------------|------------------|---------------------|
| Gültig | Ja | 1031       | 100,0            | 100,0               |

### Aufenthalt in Innsbruck mehr als 200 Tage im Jahr (Kontrollfrage)

|        |    | Häufigkeit | Gültige Prozente | Kumulierte Prozente |
|--------|----|------------|------------------|---------------------|
| Gültig | Ja | 1031       | 100,0            | 100,0               |

**Art des Hauses**

|                                | Häufigkeit | Gültige Prozente | Kumulierte Prozente |
|--------------------------------|------------|------------------|---------------------|
| Gültig                         |            |                  |                     |
| Alleinstehendes Haus           | 142        | 13,8             | 13,8                |
| Doppelhaushälfte               | 48         | 4,7              | 18,4                |
| Reihenhaus                     | 58         | 5,6              | 24,1                |
| Mehrparteienhaus <10 Wohnungen | 412        | 40,0             | 64,0                |
| Mehrparteienhaus 10+ Wohnungen | 363        | 35,2             | 99,2                |
| Anderes                        | 8          | ,8               | 100,0               |
| Gesamt                         | 1031       | 100,0            |                     |

**Eigentumsverhältnisse**

|                                | Häufigkeit | Gültige Prozente | Kumulierte Prozente |
|--------------------------------|------------|------------------|---------------------|
| Gültig                         |            |                  |                     |
| Eigentümer/in                  | 419        | 40,6             | 40,6                |
| Hauptmieter/in                 | 454        | 44,0             | 84,7                |
| Mitbewohner/in, Untermieter/in | 158        | 15,3             | 100,0               |
| Gesamt                         | 1031       | 100,0            |                     |

**Haushaltsgröße**

|                        | Häufigkeit | Gültige Prozente | Kumulierte Prozente |
|------------------------|------------|------------------|---------------------|
| Gültig                 |            |                  |                     |
| Einpersonenhaushalt    | 220        | 21,3             | 21,3                |
| Zweipersonenhaushalt   | 377        | 36,6             | 57,9                |
| Dreipersonenhaushalt   | 186        | 18,0             | 75,9                |
| Vierpersonenhaushalt   | 162        | 15,7             | 91,7                |
| Fünfpersonenhaushalt   | 61         | 5,9              | 97,6                |
| Sechspersonenhaushalt  | 17         | 1,6              | 99,2                |
| Siebenpersonenhaushalt | 5          | ,5               | 99,7                |
| Achtpersonenhaushalt   | 2          | ,2               | 99,9                |
| Zehnpersonenhaushalt   | 1          | ,1               | 100,0               |
| Gesamt                 | 1031       | 100,0            |                     |

**Anzahl Kinder unter 18 Jahren im selben Haushalt**

|              | Häufigkeit | Gültige Prozente | Kumulierte Prozente |
|--------------|------------|------------------|---------------------|
| Gültig       |            |                  |                     |
| Keine Kinder | 762        | 73,9             | 73,9                |
| 1 Kind       | 112        | 10,9             | 84,8                |
| 2 Kinder     | 111        | 10,8             | 95,5                |
| 3 Kinder     | 36         | 3,5              | 99,0                |
| 4 Kinder     | 7          | ,7               | 99,7                |
| 5 Kinder     | 3          | ,3               | 100,0               |
| Gesamt       | 1031       | 100,0            |                     |

**Stockwerk Schlafzimmer**

|                 | Häufigkeit | Gültige Prozente | Kumulierte Prozente |
|-----------------|------------|------------------|---------------------|
| 2. Untergeschoß | 1          | ,1               | ,1                  |
| 1. Untergeschoß | 3          | ,3               | ,4                  |
| Erdgeschoß      | 230        | 22,3             | 22,7                |
| 1. Stock        | 363        | 35,2             | 57,9                |
| 2. Stock        | 230        | 22,3             | 80,2                |
| 3. Stock        | 122        | 11,8             | 92,0                |
| 4. Stock        | 63         | 6,1              | 98,2                |
| 5. Stock        | 11         | 1,1              | 99,2                |
| 7. Stock        | 1          | ,1               | 99,3                |
| 8. Stock        | 3          | ,3               | 99,6                |
| 9. Stock        | 1          | ,1               | 99,7                |
| 10. Stock       | 2          | ,2               | 99,9                |
| 11. Stock       | 1          | ,1               | 100,0               |
| Gesamt          | 1031       | 100,0            |                     |

**Schutz vor Verkehrslärm durch bauliche Abschirmungen (Gebäude, Mauern, Innenhöfe,...)**

|                          | Häufigkeit | Gültige Prozente | Kumulierte Prozente |
|--------------------------|------------|------------------|---------------------|
| Nein, gar nicht          | 469        | 45,5             | 45,5                |
| Ja, sehr geringfügig     | 297        | 28,8             | 74,3                |
| Ja, zum Großteil         | 209        | 20,3             | 94,6                |
| Ja, komplett abgeschirmt | 27         | 2,6              | 97,2                |
| weiß nicht / k.A.        | 29         | 2,8              | 100,0               |
| Gesamt                   | 1031       | 100,0            |                     |

**Schutz vor Verkehrslärm durch geschützten Innenhof bzw. lärmabgewandte Seite**

|                  | Häufigkeit | Gültige Prozente | Kumulierte Prozente |
|------------------|------------|------------------|---------------------|
| Ja               | 701        | 68,0             | 68,0                |
| Nein             | 308        | 29,9             | 97,9                |
| weiß nicht/ k.A. | 22         | 2,1              | 100,0               |
| Gesamt           | 1031       | 100,0            |                     |

**Nachtschlaf bei geöffneten oder gekippten Fenstern**

|                                 | Häufigkeit | Gültige Prozente | Kumulierte Prozente |
|---------------------------------|------------|------------------|---------------------|
| Ja, häufig bis immer            | 513        | 49,8             | 49,8                |
| Ja, gelegentlich                | 308        | 29,9             | 79,6                |
| Nein, Wohnraumlüftung vorhanden | 7          | ,7               | 80,3                |
| Nein, das möchte ich nicht      | 68         | 6,6              | 86,9                |
| Nein, das wäre zu laut          | 127        | 12,3             | 99,2                |
| keine Angabe                    | 8          | ,8               | 100,0               |
| Gesamt                          | 1031       | 100,0            |                     |

**Lärmschutzfenster in den letzten 10 Jahren eingebaut**

|                  | Häufigkeit | Gültige Prozente | Kumulierte Prozente |
|------------------|------------|------------------|---------------------|
| Ja               | 187        | 18,1             | 18,1                |
| Nein             | 672        | 65,2             | 83,3                |
| weiß nicht/ k.A. | 172        | 16,7             | 100,0               |
| Gesamt           | 1031       | 100,0            |                     |

**Schutz Lärmschutzfenster vor welcher Lärmquelle**

|                                          | Häufigkeit | Gültige Prozente | Kumulierte Prozente |
|------------------------------------------|------------|------------------|---------------------|
| Gültig                                   |            |                  |                     |
| Autobahnlärm                             | 6          | ,6               | ,6                  |
| Straßenverkehrslärm                      | 110        | 10,7             | 11,3                |
| Schienenverkehrslärm                     | 16         | 1,6              | 12,8                |
| Fluglärm                                 | 28         | 2,7              | 15,5                |
| Andere Lärmquellen                       | 27         | 2,6              | 18,1                |
| Keine Lärmschutzfenster vorhanden / w.n. | 844        | 81,9             | 100,0               |
| Gesamt                                   | 1031       | 100,0            |                     |

**Ausgesetztheit Lärm gesamt**

|               | Häufigkeit | Gültige Prozente | Kumulierte Prozente |
|---------------|------------|------------------|---------------------|
| Gültig        |            |                  |                     |
| gar nicht     | 70         | 6,8              | 6,8                 |
| 1             | 62         | 6,0              | 12,8                |
| 2             | 129        | 12,5             | 25,3                |
| 3             | 186        | 18,0             | 43,4                |
| 4             | 127        | 12,3             | 55,7                |
| 5             | 159        | 15,4             | 71,1                |
| 6             | 75         | 7,3              | 78,4                |
| 7             | 83         | 8,1              | 86,4                |
| 8             | 71         | 6,9              | 93,3                |
| 9             | 27         | 2,6              | 95,9                |
| äußerst stark | 42         | 4,1              | 100,0               |
| Gesamt        | 1031       | 100,0            |                     |

**Ausgesetztheit Autobahnlärm**

|               | Häufigkeit | Gültige Prozente | Kumulierte Prozente |
|---------------|------------|------------------|---------------------|
| Gültig        |            |                  |                     |
| gar nicht     | 821        | 79,6             | 79,6                |
| 1             | 56         | 5,4              | 85,1                |
| 2             | 54         | 5,2              | 90,3                |
| 3             | 34         | 3,3              | 93,6                |
| 4             | 15         | 1,5              | 95,1                |
| 5             | 13         | 1,3              | 96,3                |
| 6             | 11         | 1,1              | 97,4                |
| 7             | 8          | ,8               | 98,2                |
| 8             | 8          | ,8               | 98,9                |
| 9             | 4          | ,4               | 99,3                |
| äußerst stark | 7          | ,7               | 100,0               |
| Gesamt        | 1031       | 100,0            |                     |

**Ausgesetztheit Strassenverkehrslärm**

|               | Häufigkeit | Gültige Prozente | Kumulierte Prozente |
|---------------|------------|------------------|---------------------|
| Gültig        |            |                  |                     |
| gar nicht     | 158        | 15,3             | 15,3                |
| 1             | 108        | 10,5             | 25,8                |
| 2             | 164        | 15,9             | 41,7                |
| 3             | 133        | 12,9             | 54,6                |
| 4             | 96         | 9,3              | 63,9                |
| 5             | 102        | 9,9              | 73,8                |
| 6             | 70         | 6,8              | 80,6                |
| 7             | 63         | 6,1              | 86,7                |
| 8             | 44         | 4,3              | 91,0                |
| 9             | 38         | 3,7              | 94,7                |
| äußerst stark | 55         | 5,3              | 100,0               |
| Gesamt        | 1031       | 100,0            |                     |

**Ausgesetztheit Schienenverkehrslärm**

|               | Häufigkeit | Gültige Prozente | Kumulierte Prozente |
|---------------|------------|------------------|---------------------|
| gar nicht     | 721        | 69,9             | 69,9                |
| 1             | 71         | 6,9              | 76,8                |
| 2             | 53         | 5,1              | 82,0                |
| 3             | 51         | 4,9              | 86,9                |
| 4             | 35         | 3,4              | 90,3                |
| 5             | 30         | 2,9              | 93,2                |
| 6             | 18         | 1,7              | 95,0                |
| 7             | 23         | 2,2              | 97,2                |
| 8             | 6          | ,6               | 97,8                |
| 9             | 10         | 1,0              | 98,7                |
| äußerst stark | 13         | 1,3              | 100,0               |
| Gesamt        | 1031       | 100,0            |                     |

**Ausgesetztheit Flugverkehrslärm**

|               | Häufigkeit | Gültige Prozente | Kumulierte Prozente |
|---------------|------------|------------------|---------------------|
| gar nicht     | 149        | 14,5             | 14,5                |
| 1             | 116        | 11,3             | 25,7                |
| 2             | 134        | 13,0             | 38,7                |
| 3             | 120        | 11,6             | 50,3                |
| 4             | 114        | 11,1             | 61,4                |
| 5             | 126        | 12,2             | 73,6                |
| 6             | 59         | 5,7              | 79,3                |
| 7             | 48         | 4,7              | 84,0                |
| 8             | 67         | 6,5              | 90,5                |
| 9             | 49         | 4,8              | 95,2                |
| äußerst stark | 49         | 4,8              | 100,0               |
| Gesamt        | 1031       | 100,0            |                     |

**Ausgesetztheit Lärm von Gewerbe und Industrie**

|               | Häufigkeit | Gültige Prozente | Kumulierte Prozente |
|---------------|------------|------------------|---------------------|
| gar nicht     | 831        | 80,6             | 80,6                |
| 1             | 53         | 5,1              | 85,7                |
| 2             | 48         | 4,7              | 90,4                |
| 3             | 34         | 3,3              | 93,7                |
| 4             | 14         | 1,4              | 95,1                |
| 5             | 13         | 1,3              | 96,3                |
| 6             | 9          | ,9               | 97,2                |
| 7             | 9          | ,9               | 98,1                |
| 8             | 7          | ,7               | 98,7                |
| 9             | 4          | ,4               | 99,1                |
| äußerst stark | 9          | ,9               | 100,0               |
| Gesamt        | 1031       | 100,0            |                     |

**Ausgesetztheit Lärm von Passanten u. Gaststätten**

|               | Häufigkeit | Gültige Prozente | Kumulierte Prozente |
|---------------|------------|------------------|---------------------|
| gar nicht     | 509        | 49,4             | 49,4                |
| 1             | 108        | 10,5             | 59,8                |
| 2             | 96         | 9,3              | 69,2                |
| 3             | 94         | 9,1              | 78,3                |
| 4             | 58         | 5,6              | 83,9                |
| 5             | 47         | 4,6              | 88,5                |
| Gültig 6      | 26         | 2,5              | 91,0                |
| 7             | 32         | 3,1              | 94,1                |
| 8             | 25         | 2,4              | 96,5                |
| 9             | 15         | 1,5              | 98,0                |
| äußerst stark | 21         | 2,0              | 100,0               |
| Gesamt        | 1031       | 100,0            |                     |

**Ausgesetztheit Lärm von Baustellen**

|               | Häufigkeit | Gültige Prozente | Kumulierte Prozente |
|---------------|------------|------------------|---------------------|
| gar nicht     | 458        | 44,4             | 44,4                |
| 1             | 111        | 10,8             | 55,2                |
| 2             | 104        | 10,1             | 65,3                |
| 3             | 72         | 7,0              | 72,3                |
| 4             | 53         | 5,1              | 77,4                |
| 5             | 58         | 5,6              | 83,0                |
| Gültig 6      | 32         | 3,1              | 86,1                |
| 7             | 36         | 3,5              | 89,6                |
| 8             | 29         | 2,8              | 92,4                |
| 9             | 20         | 1,9              | 94,4                |
| äußerst stark | 58         | 5,6              | 100,0               |
| Gesamt        | 1031       | 100,0            |                     |

**Ausgesetztheit Nachbarschaftslärm**

|               | Häufigkeit | Gültige Prozente | Kumulierte Prozente |
|---------------|------------|------------------|---------------------|
| gar nicht     | 418        | 40,5             | 40,5                |
| 1             | 140        | 13,6             | 54,1                |
| 2             | 153        | 14,8             | 69,0                |
| 3             | 91         | 8,8              | 77,8                |
| 4             | 56         | 5,4              | 83,2                |
| 5             | 46         | 4,5              | 87,7                |
| Gültig 6      | 34         | 3,3              | 91,0                |
| 7             | 30         | 2,9              | 93,9                |
| 8             | 27         | 2,6              | 96,5                |
| 9             | 16         | 1,6              | 98,1                |
| äußerst stark | 20         | 1,9              | 100,0               |
| Gesamt        | 1031       | 100,0            |                     |



**Ausgesetztheit Erschütterungen gesamt**

|               | Häufigkeit | Gültige Prozente | Kumulierte Prozente |
|---------------|------------|------------------|---------------------|
| gar nicht     | 652        | 63,2             | 63,2                |
| 1             | 89         | 8,6              | 71,9                |
| 2             | 65         | 6,3              | 78,2                |
| 3             | 56         | 5,4              | 83,6                |
| 4             | 47         | 4,6              | 88,2                |
| 5             | 27         | 2,6              | 90,8                |
| 6             | 30         | 2,9              | 93,7                |
| 7             | 23         | 2,2              | 95,9                |
| 8             | 20         | 1,9              | 97,9                |
| 9             | 9          | ,9               | 98,7                |
| äußerst stark | 13         | 1,3              | 100,0               |
| Gesamt        | 1031       | 100,0            |                     |

**Ausmaß Windeinfluss auf Lärm**

|                  | Häufigkeit | Gültige Prozente | Kumulierte Prozente |
|------------------|------------|------------------|---------------------|
| Gar nicht        | 262        | 25,4             | 25,4                |
| Eher wenig       | 421        | 40,8             | 66,2                |
| Eher stark       | 232        | 22,5             | 88,7                |
| Sehr stark       | 78         | 7,6              | 96,3                |
| weiß nicht/ k.A. | 38         | 3,7              | 100,0               |
| Gesamt           | 1031       | 100,0            |                     |

**Güte Wohnbedingungen**

|                     | Häufigkeit | Gültige Prozente | Kumulierte Prozente |
|---------------------|------------|------------------|---------------------|
| gar nicht gut       | 26         | 2,5              | 2,5                 |
| 1                   | 11         | 1,1              | 3,6                 |
| 2                   | 47         | 4,6              | 8,1                 |
| 3                   | 69         | 6,7              | 14,8                |
| 4                   | 67         | 6,5              | 21,3                |
| 5                   | 174        | 16,9             | 38,2                |
| 6                   | 84         | 8,1              | 46,4                |
| 7                   | 161        | 15,6             | 62,0                |
| 8                   | 196        | 19,0             | 81,0                |
| 9                   | 84         | 8,1              | 89,1                |
| außerordentlich gut | 110        | 10,7             | 99,8                |
| Keine Angabe        | 2          | ,2               | 100,0               |
| Gesamt              | 1031       | 100,0            |                     |

**Güte Nachbarschaftsbeziehungen**

|                     | Häufigkeit | Gültige Prozente | Kumulierte Prozente |
|---------------------|------------|------------------|---------------------|
| gar nicht gut       | 23         | 2,2              | 2,2                 |
| 1                   | 13         | 1,3              | 3,5                 |
| 2                   | 32         | 3,1              | 6,6                 |
| 3                   | 67         | 6,5              | 13,1                |
| 4                   | 55         | 5,3              | 18,4                |
| 5                   | 178        | 17,3             | 35,7                |
| 6                   | 94         | 9,1              | 44,8                |
| 7                   | 147        | 14,3             | 59,1                |
| 8                   | 162        | 15,7             | 74,8                |
| 9                   | 88         | 8,5              | 83,3                |
| außerordentlich gut | 159        | 15,4             | 98,7                |
| Keine Angabe        | 13         | 1,3              | 100,0               |
| Gesamt              | 1031       | 100,0            |                     |

**Güte Sicherheit**

|                     | Häufigkeit | Gültige Prozente | Kumulierte Prozente |
|---------------------|------------|------------------|---------------------|
| gar nicht gut       | 38         | 3,7              | 3,7                 |
| 1                   | 22         | 2,1              | 5,8                 |
| 2                   | 49         | 4,8              | 10,6                |
| 3                   | 58         | 5,6              | 16,2                |
| 4                   | 67         | 6,5              | 22,7                |
| 5                   | 140        | 13,6             | 36,3                |
| Gültig 6            | 87         | 8,4              | 44,7                |
| 7                   | 176        | 17,1             | 61,8                |
| 8                   | 217        | 21,0             | 82,8                |
| 9                   | 79         | 7,7              | 90,5                |
| außerordentlich gut | 97         | 9,4              | 99,9                |
| Keine Angabe        | 1          | ,1               | 100,0               |
| Gesamt              | 1031       | 100,0            |                     |

**Güte Landschaft, Natur, öffentliche Parks und Grünflächen**

|                     | Häufigkeit | Gültige Prozente | Kumulierte Prozente |
|---------------------|------------|------------------|---------------------|
| gar nicht gut       | 17         | 1,6              | 1,6                 |
| 1                   | 7          | ,7               | 2,3                 |
| 2                   | 27         | 2,6              | 4,9                 |
| 3                   | 42         | 4,1              | 9,0                 |
| 4                   | 42         | 4,1              | 13,1                |
| 5                   | 103        | 10,0             | 23,1                |
| Gültig 6            | 71         | 6,9              | 30,0                |
| 7                   | 145        | 14,1             | 44,0                |
| 8                   | 222        | 21,5             | 65,6                |
| 9                   | 161        | 15,6             | 81,2                |
| außerordentlich gut | 188        | 18,2             | 99,4                |
| Keine Angabe        | 6          | ,6               | 100,0               |
| Gesamt              | 1031       | 100,0            |                     |

**Güte Luftqualität**

|                     | Häufigkeit | Gültige Prozente | Kumulierte Prozente |
|---------------------|------------|------------------|---------------------|
| gar nicht gut       | 17         | 1,6              | 1,6                 |
| 1                   | 15         | 1,5              | 3,1                 |
| 2                   | 53         | 5,1              | 8,2                 |
| 3                   | 93         | 9,0              | 17,3                |
| 4                   | 99         | 9,6              | 26,9                |
| 5                   | 163        | 15,8             | 42,7                |
| Gültig 6            | 103        | 10,0             | 52,7                |
| 7                   | 142        | 13,8             | 66,4                |
| 8                   | 180        | 17,5             | 83,9                |
| 9                   | 83         | 8,1              | 91,9                |
| außerordentlich gut | 82         | 8,0              | 99,9                |
| Keine Angabe        | 1          | ,1               | 100,0               |
| Gesamt              | 1031       | 100,0            |                     |

**Güte öffentliche Verkehrsverbindungen**

|                     | Häufigkeit | Gültige Prozente | Kumulierte Prozente |
|---------------------|------------|------------------|---------------------|
| gar nicht gut       | 7          | ,7               | ,7                  |
| 1                   | 6          | ,6               | 1,3                 |
| 2                   | 14         | 1,4              | 2,6                 |
| 3                   | 31         | 3,0              | 5,6                 |
| 4                   | 34         | 3,3              | 8,9                 |
| 5                   | 64         | 6,2              | 15,1                |
| Gültig 6            | 74         | 7,2              | 22,3                |
| 7                   | 133        | 12,9             | 35,2                |
| 8                   | 239        | 23,2             | 58,4                |
| 9                   | 200        | 19,4             | 77,8                |
| außerordentlich gut | 217        | 21,0             | 98,8                |
| Keine Angabe        | 12         | 1,2              | 100,0               |
| Gesamt              | 1031       | 100,0            |                     |

**Güte Bedingungen für Kinder**

|                     | Häufigkeit | Gültige Prozente | Kumulierte Prozente |
|---------------------|------------|------------------|---------------------|
| gar nicht gut       | 13         | 1,3              | 1,3                 |
| 1                   | 11         | 1,1              | 2,3                 |
| 2                   | 23         | 2,2              | 4,6                 |
| 3                   | 41         | 4,0              | 8,5                 |
| 4                   | 46         | 4,5              | 13,0                |
| 5                   | 137        | 13,3             | 26,3                |
| Gültig 6            | 107        | 10,4             | 36,7                |
| 7                   | 184        | 17,8             | 54,5                |
| 8                   | 220        | 21,3             | 75,8                |
| 9                   | 98         | 9,5              | 85,4                |
| außerordentlich gut | 129        | 12,5             | 97,9                |
| Keine Angabe        | 22         | 2,1              | 100,0               |
| Gesamt              | 1031       | 100,0            |                     |

**Ausmaß Verbundenheit zur Stadt Innsbruck**

|                 | Häufigkeit | Gültige Prozente | Kumulierte Prozente |
|-----------------|------------|------------------|---------------------|
| gar nicht       | 22         | 2,1              | 2,1                 |
| 1               | 6          | ,6               | 2,7                 |
| 2               | 27         | 2,6              | 5,3                 |
| 3               | 28         | 2,7              | 8,1                 |
| 4               | 31         | 3,0              | 11,1                |
| 5               | 98         | 9,5              | 20,6                |
| Gültig 6        | 76         | 7,4              | 27,9                |
| 7               | 146        | 14,2             | 42,1                |
| 8               | 210        | 20,4             | 62,5                |
| 9               | 146        | 14,2             | 76,6                |
| außerordentlich | 239        | 23,2             | 99,8                |
| Keine Angabe    | 2          | ,2               | 100,0               |
| Gesamt          | 1031       | 100,0            |                     |

**Ausmaß Zufriedenheit eigene Wohnsituation insgesamt**

|                           | Häufigkeit | Gültige Prozente | Kumulierte Prozente |
|---------------------------|------------|------------------|---------------------|
| gar nicht zufrieden       | 13         | 1,3              | 1,3                 |
| 1                         | 7          | ,7               | 1,9                 |
| 2                         | 8          | ,8               | 2,7                 |
| 3                         | 22         | 2,1              | 4,8                 |
| 4                         | 17         | 1,6              | 6,5                 |
| 5                         | 48         | 4,7              | 11,2                |
| Gültig 6                  | 54         | 5,2              | 16,4                |
| 7                         | 117        | 11,3             | 27,7                |
| 8                         | 212        | 20,6             | 48,3                |
| 9                         | 202        | 19,6             | 67,9                |
| Außerordentlich zufrieden | 330        | 32,0             | 99,9                |
| Keine Angabe              | 1          | ,1               | 100,0               |
| Gesamt                    | 1031       | 100,0            |                     |

**Güte eigene Lebensqualität**

|                     | Häufigkeit | Gültige Prozente | Kumulierte Prozente |
|---------------------|------------|------------------|---------------------|
| gar nicht gut       | 3          | ,3               | ,3                  |
| 1                   | 3          | ,3               | ,6                  |
| 2                   | 4          | ,4               | 1,0                 |
| 3                   | 15         | 1,5              | 2,4                 |
| 4                   | 19         | 1,8              | 4,3                 |
| 5                   | 56         | 5,4              | 9,7                 |
| Gültig 6            | 53         | 5,1              | 14,8                |
| 7                   | 147        | 14,3             | 29,1                |
| 8                   | 284        | 27,5             | 56,6                |
| 9                   | 210        | 20,4             | 77,0                |
| außerordentlich gut | 231        | 22,4             | 99,4                |
| Keine Angabe        | 6          | ,6               | 100,0               |
| Gesamt              | 1031       | 100,0            |                     |

**Ausmaß eigene Lärmempfindlichkeit**

|                             | Häufigkeit | Gültige Prozente | Kumulierte Prozente |
|-----------------------------|------------|------------------|---------------------|
| überhaupt nicht empfindlich | 72         | 7,0              | 7,0                 |
| 1                           | 66         | 6,4              | 13,4                |
| 2                           | 137        | 13,3             | 26,7                |
| 3                           | 159        | 15,4             | 42,1                |
| 4                           | 85         | 8,2              | 50,3                |
| Gültig 5                    | 184        | 17,8             | 68,2                |
| 6                           | 75         | 7,3              | 75,5                |
| 7                           | 81         | 7,9              | 83,3                |
| 8                           | 81         | 7,9              | 91,2                |
| 9                           | 46         | 4,5              | 95,6                |
| außerordentlich empfindlich | 45         | 4,4              | 100,0               |
| Gesamt                      | 1031       | 100,0            |                     |

**Güte eigener Gesundheitszustand**

|                   | Häufigkeit | Gültige Prozente | Kumulierte Prozente |
|-------------------|------------|------------------|---------------------|
| Sehr gut          | 354        | 34,3             | 34,3                |
| Gut               | 400        | 38,8             | 73,1                |
| Zufriedenstellend | 186        | 18,0             | 91,2                |
| Weniger gut       | 65         | 6,3              | 97,5                |
| Schlecht          | 24         | 2,3              | 99,8                |
| keine Angabe      | 2          | ,2               | 100,0               |
| Gesamt            | 1031       | 100,0            |                     |

**Belästigung Lärm gesamt**

|                                 | Häufigkeit | Gültige Prozente | Kumulierte Prozente |
|---------------------------------|------------|------------------|---------------------|
| belästigt/stört überhaupt nicht | 138        | 13,4             | 13,4                |
| 1                               | 80         | 7,8              | 21,1                |
| 2                               | 160        | 15,5             | 36,7                |
| 3                               | 146        | 14,2             | 50,8                |
| 4                               | 90         | 8,7              | 59,6                |
| 5                               | 128        | 12,4             | 72,0                |
| 6                               | 72         | 7,0              | 79,0                |
| 7                               | 92         | 8,9              | 87,9                |
| 8                               | 62         | 6,0              | 93,9                |
| 9                               | 27         | 2,6              | 96,5                |
| belästigt/stört besonders stark | 36         | 3,5              | 100,0               |
| Gesamt                          | 1031       | 100,0            |                     |

**Belästigung Autobahnlärm**

|                                 | Häufigkeit | Gültige Prozente | Kumulierte Prozente |
|---------------------------------|------------|------------------|---------------------|
| belästigt/stört überhaupt nicht | 849        | 82,3             | 82,3                |
| 1                               | 49         | 4,8              | 87,1                |
| 2                               | 49         | 4,8              | 91,9                |
| 3                               | 26         | 2,5              | 94,4                |
| 4                               | 9          | ,9               | 95,2                |
| 5                               | 13         | 1,3              | 96,5                |
| 6                               | 8          | ,8               | 97,3                |
| 7                               | 6          | ,6               | 97,9                |
| 8                               | 9          | ,9               | 98,7                |
| 9                               | 3          | ,3               | 99,0                |
| belästigt/stört besonders stark | 10         | 1,0              | 100,0               |
| Gesamt                          | 1031       | 100,0            |                     |

**Belästigung Strassenverkehrslärm**

|                                 | Häufigkeit | Gültige Prozente | Kumulierte Prozente |
|---------------------------------|------------|------------------|---------------------|
| belästigt/stört überhaupt nicht | 252        | 24,4             | 24,4                |
| 1                               | 127        | 12,3             | 36,8                |
| 2                               | 160        | 15,5             | 52,3                |
| 3                               | 111        | 10,8             | 63,0                |
| 4                               | 82         | 8,0              | 71,0                |
| 5                               | 82         | 8,0              | 79,0                |
| 6                               | 59         | 5,7              | 84,7                |
| 7                               | 41         | 4,0              | 88,7                |
| 8                               | 53         | 5,1              | 93,8                |
| 9                               | 28         | 2,7              | 96,5                |
| belästigt/stört besonders stark | 36         | 3,5              | 100,0               |
| Gesamt                          | 1031       | 100,0            |                     |

**Belästigung Schienenverkehrslärm**

|                                 | Häufigkeit | Gültige Prozente | Kumulierte Prozente |
|---------------------------------|------------|------------------|---------------------|
| belästigt/stört überhaupt nicht | 712        | 69,1             | 69,1                |
| 1                               | 71         | 6,9              | 75,9                |
| 2                               | 57         | 5,5              | 81,5                |
| 3                               | 60         | 5,8              | 87,3                |
| 4                               | 33         | 3,2              | 90,5                |
| 5                               | 30         | 2,9              | 93,4                |
| 6                               | 17         | 1,6              | 95,1                |
| 7                               | 21         | 2,0              | 97,1                |
| 8                               | 15         | 1,5              | 98,5                |
| 9                               | 8          | ,8               | 99,3                |
| belästigt/stört besonders stark | 7          | ,7               | 100,0               |
| Gesamt                          | 1031       | 100,0            |                     |

**Belästigung Fluglärm**

|                                 | Häufigkeit | Gültige Prozente | Kumulierte Prozente |
|---------------------------------|------------|------------------|---------------------|
| belästigt/stört überhaupt nicht | 249        | 24,2             | 24,2                |
| 1                               | 125        | 12,1             | 36,3                |
| 2                               | 136        | 13,2             | 49,5                |
| 3                               | 119        | 11,5             | 61,0                |
| 4                               | 83         | 8,1              | 69,1                |
| 5                               | 104        | 10,1             | 79,1                |
| 6                               | 52         | 5,0              | 84,2                |
| 7                               | 42         | 4,1              | 88,3                |
| 8                               | 68         | 6,6              | 94,9                |
| 9                               | 24         | 2,3              | 97,2                |
| belästigt/stört besonders stark | 29         | 2,8              | 100,0               |
| Gesamt                          | 1031       | 100,0            |                     |

**Belästigung Lärm aus Gewerbe u. Industrie**

|                                 | Häufigkeit | Gültige Prozente | Kumulierte Prozente |
|---------------------------------|------------|------------------|---------------------|
| belästigt/stört überhaupt nicht | 836        | 81,1             | 81,1                |
| 1                               | 45         | 4,4              | 85,5                |
| 2                               | 56         | 5,4              | 90,9                |
| 3                               | 28         | 2,7              | 93,6                |
| 4                               | 13         | 1,3              | 94,9                |
| 5                               | 20         | 1,9              | 96,8                |
| 6                               | 8          | ,8               | 97,6                |
| 7                               | 10         | 1,0              | 98,5                |
| 8                               | 5          | ,5               | 99,0                |
| 9                               | 2          | ,2               | 99,2                |
| belästigt/stört besonders stark | 8          | ,8               | 100,0               |
| Gesamt                          | 1031       | 100,0            |                     |

**Belästigung Lärm von Passanten und Gaststätten**

|                                 | Häufigkeit | Gültige Prozente | Kumulierte Prozente |
|---------------------------------|------------|------------------|---------------------|
| belästigt/stört überhaupt nicht | 545        | 52,9             | 52,9                |
| 1                               | 91         | 8,8              | 61,7                |
| 2                               | 112        | 10,9             | 72,6                |
| 3                               | 96         | 9,3              | 81,9                |
| 4                               | 41         | 4,0              | 85,8                |
| 5                               | 49         | 4,8              | 90,6                |
| 6                               | 26         | 2,5              | 93,1                |
| 7                               | 21         | 2,0              | 95,2                |
| 8                               | 19         | 1,8              | 97,0                |
| 9                               | 13         | 1,3              | 98,3                |
| belästigt/stört besonders stark | 18         | 1,7              | 100,0               |
| Gesamt                          | 1031       | 100,0            |                     |

**Belästigung Baustellenlärm**

|                                 | Häufigkeit | Gültige Prozente | Kumulierte Prozente |
|---------------------------------|------------|------------------|---------------------|
| belästigt/stört überhaupt nicht | 500        | 48,5             | 48,5                |
| 1                               | 86         | 8,3              | 56,8                |
| 2                               | 84         | 8,1              | 65,0                |
| 3                               | 87         | 8,4              | 73,4                |
| 4                               | 42         | 4,1              | 77,5                |
| 5                               | 57         | 5,5              | 83,0                |
| 6                               | 35         | 3,4              | 86,4                |
| 7                               | 43         | 4,2              | 90,6                |
| 8                               | 33         | 3,2              | 93,8                |
| 9                               | 22         | 2,1              | 95,9                |
| belästigt/stört besonders stark | 41         | 4,0              | 99,9                |
| Keine Angabe                    | 1          | ,1               | 100,0               |
| Gesamt                          | 1031       | 100,0            |                     |

**Belästigung Nachbarschaftslärm**

|                                 | Häufigkeit | Gültige Prozente | Kumulierte Prozente |
|---------------------------------|------------|------------------|---------------------|
| belästigt/stört überhaupt nicht | 480        | 46,6             | 46,6                |
| 1                               | 147        | 14,3             | 60,8                |
| 2                               | 109        | 10,6             | 71,4                |
| 3                               | 92         | 8,9              | 80,3                |
| 4                               | 59         | 5,7              | 86,0                |
| 5                               | 46         | 4,5              | 90,5                |
| 6                               | 22         | 2,1              | 92,6                |
| 7                               | 24         | 2,3              | 95,0                |
| 8                               | 24         | 2,3              | 97,3                |
| 9                               | 11         | 1,1              | 98,4                |
| belästigt/stört besonders stark | 17         | 1,6              | 100,0               |
| Gesamt                          | 1031       | 100,0            |                     |

**Belästigung Erschütterungen gesamt**

|                                 | Häufigkeit | Gültige Prozente | Kumulierte Prozente |
|---------------------------------|------------|------------------|---------------------|
| belästigt/stört überhaupt nicht | 723        | 70,1             | 70,1                |
| 1                               | 77         | 7,5              | 77,6                |
| 2                               | 62         | 6,0              | 83,6                |
| 3                               | 37         | 3,6              | 87,2                |
| 4                               | 31         | 3,0              | 90,2                |
| 5                               | 32         | 3,1              | 93,3                |
| 6                               | 18         | 1,7              | 95,1                |
| 7                               | 17         | 1,6              | 96,7                |
| 8                               | 19         | 1,8              | 98,5                |
| 9                               | 4          | ,4               | 98,9                |
| belästigt/stört besonders stark | 11         | 1,1              | 100,0               |
| Gesamt                          | 1031       | 100,0            |                     |

**Belästigung im Schlaf Lärm gesamt**

|                                 | Häufigkeit | Gültige Prozente | Kumulierte Prozente |
|---------------------------------|------------|------------------|---------------------|
| belästigt/stört überhaupt nicht | 470        | 45,6             | 45,6                |
| 1                               | 92         | 8,9              | 54,5                |
| 2                               | 133        | 12,9             | 67,4                |
| 3                               | 82         | 8,0              | 75,4                |
| 4                               | 46         | 4,5              | 79,8                |
| 5                               | 63         | 6,1              | 85,9                |
| 6                               | 34         | 3,3              | 89,2                |
| 7                               | 31         | 3,0              | 92,2                |
| 8                               | 41         | 4,0              | 96,2                |
| 9                               | 17         | 1,6              | 97,9                |
| belästigt/stört besonders stark | 22         | 2,1              | 100,0               |
| Gesamt                          | 1031       | 100,0            |                     |

**Belästigung im Schlaf Autobahnlärm**

|                                 | Häufigkeit | Gültige Prozente | Kumulierte Prozente |
|---------------------------------|------------|------------------|---------------------|
| belästigt/stört überhaupt nicht | 948        | 91,9             | 91,9                |
| 1                               | 25         | 2,4              | 94,4                |
| 2                               | 16         | 1,6              | 95,9                |
| 3                               | 11         | 1,1              | 97,0                |
| 4                               | 4          | ,4               | 97,4                |
| 5                               | 8          | ,8               | 98,2                |
| 6                               | 5          | ,5               | 98,6                |
| 7                               | 4          | ,4               | 99,0                |
| 8                               | 3          | ,3               | 99,3                |
| 9                               | 3          | ,3               | 99,6                |
| belästigt/stört besonders stark | 4          | ,4               | 100,0               |
| Gesamt                          | 1031       | 100,0            |                     |



**Belästigung im Schlaf Straßenverkehrslärm**

|                                 | Häufigkeit | Gültige Prozente | Kumulierte Prozente |
|---------------------------------|------------|------------------|---------------------|
| belästigt/stört überhaupt nicht | 595        | 57,7             | 57,7                |
| 1                               | 103        | 10,0             | 67,7                |
| 2                               | 94         | 9,1              | 76,8                |
| 3                               | 49         | 4,8              | 81,6                |
| 4                               | 45         | 4,4              | 85,9                |
| 5                               | 35         | 3,4              | 89,3                |
| 6                               | 27         | 2,6              | 91,9                |
| 7                               | 27         | 2,6              | 94,6                |
| 8                               | 31         | 3,0              | 97,6                |
| 9                               | 9          | ,9               | 98,4                |
| belästigt/stört besonders stark | 16         | 1,6              | 100,0               |
| Gesamt                          | 1031       | 100,0            |                     |

**Belästigung im Schlaf Schienenverkehrslärm**

|                                 | Häufigkeit | Gültige Prozente | Kumulierte Prozente |
|---------------------------------|------------|------------------|---------------------|
| belästigt/stört überhaupt nicht | 861        | 83,5             | 83,5                |
| 1                               | 36         | 3,5              | 87,0                |
| 2                               | 37         | 3,6              | 90,6                |
| 3                               | 18         | 1,7              | 92,3                |
| 4                               | 20         | 1,9              | 94,3                |
| 5                               | 23         | 2,2              | 96,5                |
| 6                               | 7          | ,7               | 97,2                |
| 7                               | 14         | 1,4              | 98,5                |
| 8                               | 3          | ,3               | 98,8                |
| 9                               | 6          | ,6               | 99,4                |
| belästigt/stört besonders stark | 6          | ,6               | 100,0               |
| Gesamt                          | 1031       | 100,0            |                     |

**Belästigung im Schlaf Fluglärm**

|                                 | Häufigkeit | Gültige Prozente | Kumulierte Prozente |
|---------------------------------|------------|------------------|---------------------|
| belästigt/stört überhaupt nicht | 725        | 70,3             | 70,3                |
| 1                               | 73         | 7,1              | 77,4                |
| 2                               | 72         | 7,0              | 84,4                |
| 3                               | 40         | 3,9              | 88,3                |
| 4                               | 30         | 2,9              | 91,2                |
| 5                               | 24         | 2,3              | 93,5                |
| 6                               | 9          | ,9               | 94,4                |
| 7                               | 18         | 1,7              | 96,1                |
| 8                               | 13         | 1,3              | 97,4                |
| 9                               | 10         | 1,0              | 98,4                |
| belästigt/stört besonders stark | 17         | 1,6              | 100,0               |
| Gesamt                          | 1031       | 100,0            |                     |

**Belästigung im Schlaf Lärm von Gewerbe und Industrie**

|                                 | Häufigkeit | Gültige Prozente | Kumulierte Prozente |
|---------------------------------|------------|------------------|---------------------|
| belästigt/stört überhaupt nicht | 931        | 90,3             | 90,3                |
| 1                               | 30         | 2,9              | 93,2                |
| 2                               | 22         | 2,1              | 95,3                |
| 3                               | 8          | ,8               | 96,1                |
| 4                               | 6          | ,6               | 96,7                |
| 5                               | 9          | ,9               | 97,6                |
| 6                               | 8          | ,8               | 98,4                |
| 7                               | 7          | ,7               | 99,0                |
| 8                               | 2          | ,2               | 99,2                |
| 9                               | 4          | ,4               | 99,6                |
| belästigt/stört besonders stark | 4          | ,4               | 100,0               |
| Gesamt                          | 1031       | 100,0            |                     |

**Belästigung im Schlaf Lärm von Passanten und Gaststätten**

|                                 | Häufigkeit | Gültige Prozente | Kumulierte Prozente |
|---------------------------------|------------|------------------|---------------------|
| belästigt/stört überhaupt nicht | 668        | 64,8             | 64,8                |
| 1                               | 97         | 9,4              | 74,2                |
| 2                               | 58         | 5,6              | 79,8                |
| 3                               | 48         | 4,7              | 84,5                |
| 4                               | 33         | 3,2              | 87,7                |
| 5                               | 32         | 3,1              | 90,8                |
| 6                               | 17         | 1,6              | 92,4                |
| 7                               | 21         | 2,0              | 94,5                |
| 8                               | 27         | 2,6              | 97,1                |
| 9                               | 13         | 1,3              | 98,4                |
| belästigt/stört besonders stark | 17         | 1,6              | 100,0               |
| Gesamt                          | 1031       | 100,0            |                     |

**Belästigung im Schlaf Lärm von Baustellen**

|                                 | Häufigkeit | Gültige Prozente | Kumulierte Prozente |
|---------------------------------|------------|------------------|---------------------|
| belästigt/stört überhaupt nicht | 837        | 81,2             | 81,2                |
| 1                               | 49         | 4,8              | 85,9                |
| 2                               | 30         | 2,9              | 88,8                |
| 3                               | 22         | 2,1              | 91,0                |
| 4                               | 21         | 2,0              | 93,0                |
| 5                               | 14         | 1,4              | 94,4                |
| 6                               | 15         | 1,5              | 95,8                |
| 7                               | 20         | 1,9              | 97,8                |
| 8                               | 11         | 1,1              | 98,8                |
| 9                               | 3          | ,3               | 99,1                |
| belästigt/stört besonders stark | 8          | ,8               | 99,9                |
| Keine Angabe                    | 1          | ,1               | 100,0               |
| Gesamt                          | 1031       | 100,0            |                     |

**Belästigung im Schlaf Nachbarschaftslärm**

|                                 | Häufigkeit | Gültige Prozente | Kumulierte Prozente |
|---------------------------------|------------|------------------|---------------------|
| belästigt/stört überhaupt nicht | 666        | 64,6             | 64,6                |
| 1                               | 108        | 10,5             | 75,1                |
| 2                               | 68         | 6,6              | 81,7                |
| 3                               | 51         | 4,9              | 86,6                |
| 4                               | 26         | 2,5              | 89,1                |
| 5                               | 27         | 2,6              | 91,8                |
| 6                               | 14         | 1,4              | 93,1                |
| 7                               | 27         | 2,6              | 95,7                |
| 8                               | 19         | 1,8              | 97,6                |
| 9                               | 11         | 1,1              | 98,6                |
| belästigt/stört besonders stark | 14         | 1,4              | 100,0               |
| Gesamt                          | 1031       | 100,0            |                     |

**Belästigung im Schlaf Erschütterungen gesamt**

|                                 | Häufigkeit | Gültige Prozente | Kumulierte Prozente |
|---------------------------------|------------|------------------|---------------------|
| belästigt/stört überhaupt nicht | 861        | 83,5             | 83,5                |
| 1                               | 56         | 5,4              | 88,9                |
| 2                               | 29         | 2,8              | 91,8                |
| 3                               | 27         | 2,6              | 94,4                |
| 4                               | 12         | 1,2              | 95,5                |
| 5                               | 18         | 1,7              | 97,3                |
| 6                               | 10         | 1,0              | 98,3                |
| 7                               | 6          | ,6               | 98,8                |
| 8                               | 5          | ,5               | 99,3                |
| 9                               | 3          | ,3               | 99,6                |
| belästigt/stört besonders stark | 4          | ,4               | 100,0               |
| Gesamt                          | 1031       | 100,0            |                     |

**Lärmcoping: Fenster im Sommer nachts geschlossen**

|        | Häufigkeit | Gültige Prozente | Kumulierte Prozente |
|--------|------------|------------------|---------------------|
| Ja     | 472        | 45,8             | 45,8                |
| Nein   | 559        | 54,2             | 100,0               |
| Gesamt | 1031       | 100,0            |                     |

**Lärmcoping: Garten/Balkon nicht genutzt**

|              | Häufigkeit | Gültige Prozente | Kumulierte Prozente |
|--------------|------------|------------------|---------------------|
| Ja           | 218        | 21,1             | 21,1                |
| Nein         | 812        | 78,8             | 99,9                |
| Keine Angabe | 1          | ,1               | 100,0               |
| Gesamt       | 1031       | 100,0            |                     |

**Lärmcoping: Andere Nutzung Wohnräume**

|        | Häufigkeit | Gültige Prozente | Kumulierte Prozente |
|--------|------------|------------------|---------------------|
| Ja     | 159        | 15,4             | 15,4                |
| Nein   | 872        | 84,6             | 100,0               |
| Gesamt | 1031       | 100,0            |                     |

**Lärmcoping: Ärger über Verkehrslärm**

|        | Häufigkeit | Gültige Prozente | Kumulierte Prozente |
|--------|------------|------------------|---------------------|
| Ja     | 568        | 55,1             | 55,1                |
| Nein   | 463        | 44,9             | 100,0               |
| Gesamt | 1031       | 100,0            |                     |

**Lärmcoping: Hilflosigkeit wegen Verkehrslärm**

|        |        | Häufigkeit | Gültige Prozente | Kumulierte Prozente |
|--------|--------|------------|------------------|---------------------|
| Gültig | Ja     | 246        | 23,9             | 23,9                |
|        | Nein   | 785        | 76,1             | 100,0               |
|        | Gesamt | 1031       | 100,0            |                     |

**Lärmcoping: Gefühlte Zunahme Lärmbelastung**

|        |        | Häufigkeit | Gültige Prozente | Kumulierte Prozente |
|--------|--------|------------|------------------|---------------------|
| Gültig | Ja     | 436        | 42,3             | 42,3                |
|        | Nein   | 595        | 57,7             | 100,0               |
|        | Gesamt | 1031       | 100,0            |                     |

**Lärmcoping: Gefühlte Abnahme Lärmbelastung**

|        |        | Häufigkeit | Gültige Prozente | Kumulierte Prozente |
|--------|--------|------------|------------------|---------------------|
| Gültig | Ja     | 58         | 5,6              | 5,6                 |
|        | Nein   | 973        | 94,4             | 100,0               |
|        | Gesamt | 1031       | 100,0            |                     |

**Lärmcoping: Gespräche mit Nachbarn über Lärm**

|        |        | Häufigkeit | Gültige Prozente | Kumulierte Prozente |
|--------|--------|------------|------------------|---------------------|
| Gültig | Ja     | 354        | 34,3             | 34,3                |
|        | Nein   | 677        | 65,7             | 100,0               |
|        | Gesamt | 1031       | 100,0            |                     |

**Lärmcoping: Gespräche mit Behörden über Lärm**

|        |        | Häufigkeit | Gültige Prozente | Kumulierte Prozente |
|--------|--------|------------|------------------|---------------------|
| Gültig | Ja     | 134        | 13,0             | 13,0                |
|        | Nein   | 897        | 87,0             | 100,0               |
|        | Gesamt | 1031       | 100,0            |                     |

**Derzeitige berufliche Stellung**

|        |                                     | Häufigkeit | Gültige Prozente | Kumulierte Prozente |
|--------|-------------------------------------|------------|------------------|---------------------|
| Gültig | Selbständig                         | 88         | 8,5              | 8,5                 |
|        | Angestellte(r)                      | 349        | 33,9             | 42,4                |
|        | Vertragsbedienstete/r oder Beamte/r | 47         | 4,6              | 46,9                |
|        | Facharbeiter/in                     | 21         | 2,0              | 49,0                |
|        | angelernte/r Arbeiter/in            | 19         | 1,8              | 50,8                |
|        | Hausfrau/-Mann                      | 40         | 3,9              | 54,7                |
|        | in Ausbildung                       | 144        | 14,0             | 68,7                |
|        | Präsenz- oder Zivildienstler        | 3          | ,3               | 69,0                |
|        | mithelfend im Familienbetrieb       | 1          | ,1               | 69,1                |
|        | Pensionist/in                       | 266        | 25,8             | 94,9                |
|        | derzeit nicht berufstätig           | 53         | 5,1              | 100,0               |
|        | Gesamt                              | 1031       | 100,0            |                     |

**Höchster bisher erreichter Bildungsabschluss**

|                                     | Häufigkeit | Gültige Prozente | Kumulierte Prozente |
|-------------------------------------|------------|------------------|---------------------|
| Pflichtschule                       | 98         | 9,5              | 9,5                 |
| Abgeschlossene Lehre                | 166        | 16,1             | 25,6                |
| Fachschule ohne Matura              | 114        | 11,1             | 36,7                |
| Gültig Matura                       | 262        | 25,4             | 62,1                |
| Universität, FH oder Vergleichbares | 388        | 37,6             | 99,7                |
| Keine Angabe                        | 3          | ,3               | 100,0               |
| Gesamt                              | 1031       | 100,0            |                     |

**Arbeits- oder Ausbildungsplatz in Innsbruck**

|                                          | Häufigkeit | Gültige Prozente | Kumulierte Prozente |
|------------------------------------------|------------|------------------|---------------------|
| Ja                                       | 573        | 55,6             | 55,6                |
| Nein                                     | 98         | 9,5              | 65,1                |
| Gültig Nicht zutreffend (in Pension ...) | 359        | 34,8             | 99,9                |
| Keine Angabe                             | 1          | ,1               | 100,0               |
| Gesamt                                   | 1031       | 100,0            |                     |

**Vorrangiges Verkehrsmittel auf dem Weg zum Arbeits- oder Ausbildungsplatz**

|                                   | Häufigkeit | Gültige Prozente | Kumulierte Prozente |
|-----------------------------------|------------|------------------|---------------------|
| Auto oder Motorrad                | 206        | 20,0             | 20,0                |
| Eisenbahn                         | 10         | 1,0              | 21,0                |
| Bus oder andere Öffis             | 148        | 14,4             | 35,3                |
| Gültig Fahrrad                    | 203        | 19,7             | 55,0                |
| Ich gehe zu Fuß                   | 106        | 10,3             | 65,3                |
| Nicht zutreffend (in Pension ...) | 358        | 34,7             | 100,0               |
| Gesamt                            | 1031       | 100,0            |                     |

**Häufigkeit Nutzung eines Autos als Fahrer/in**

|                           | Häufigkeit | Gültige Prozente | Kumulierte Prozente |
|---------------------------|------------|------------------|---------------------|
| (Fast) täglich            | 243        | 23,6             | 23,6                |
| Mehrmals pro Woche        | 269        | 26,1             | 49,7                |
| Gültig Mehrmals pro Monat | 182        | 17,7             | 67,3                |
| Mehrmals pro Jahr         | 44         | 4,3              | 71,6                |
| (Fast) nie                | 293        | 28,4             | 100,0               |
| Gesamt                    | 1031       | 100,0            |                     |

**Häufigkeit Nutzung öffentl. Verkehrsmittel innerhalb der Stadt**

|                           | Häufigkeit | Gültige Prozente | Kumulierte Prozente |
|---------------------------|------------|------------------|---------------------|
| (Fast) täglich            | 193        | 18,7             | 18,7                |
| Mehrmals pro Woche        | 194        | 18,8             | 37,5                |
| Gültig Mehrmals pro Monat | 231        | 22,4             | 59,9                |
| Mehrmals pro Jahr         | 142        | 13,8             | 73,7                |
| (Fast) nie                | 270        | 26,2             | 99,9                |
| Keine Angabe              | 1          | ,1               | 100,0               |
| Gesamt                    | 1031       | 100,0            |                     |

**Häufigkeit Nutzung der Eisenbahn oder von Autobussen außerhalb der Stadt**

|                          | Häufigkeit | Gültige Prozente | Kumulierte Prozente |
|--------------------------|------------|------------------|---------------------|
| (Fast) täglich           | 12         | 1,2              | 1,2                 |
| Mehrmals pro Woche       | 46         | 4,5              | 5,6                 |
| Mehrmals pro Monat       | 162        | 15,7             | 21,3                |
| Gültig Mehrmals pro Jahr | 347        | 33,7             | 55,0                |
| (Fast) nie               | 463        | 44,9             | 99,9                |
| Keine Angabe             | 1          | ,1               | 100,0               |
| Gesamt                   | 1031       | 100,0            |                     |

**Häufigkeit Nutzung eines Fahrrads**

|                          | Häufigkeit | Gültige Prozente | Kumulierte Prozente |
|--------------------------|------------|------------------|---------------------|
| (Fast) täglich           | 310        | 30,1             | 30,1                |
| Mehrmals pro Woche       | 159        | 15,4             | 45,5                |
| Mehrmals pro Monat       | 136        | 13,2             | 58,7                |
| Gültig Mehrmals pro Jahr | 78         | 7,6              | 66,2                |
| (Fast) nie               | 348        | 33,8             | 100,0               |
| Gesamt                   | 1031       | 100,0            |                     |

**Häufigkeit länger als 10 Minuten zu Fuß gehen**

|                          | Häufigkeit | Gültige Prozente | Kumulierte Prozente |
|--------------------------|------------|------------------|---------------------|
| (Fast) täglich           | 622        | 60,3             | 60,3                |
| Mehrmals pro Woche       | 280        | 27,2             | 87,5                |
| Mehrmals pro Monat       | 78         | 7,6              | 95,1                |
| Gültig Mehrmals pro Jahr | 17         | 1,6              | 96,7                |
| (Fast) nie               | 34         | 3,3              | 100,0               |
| Gesamt                   | 1031       | 100,0            |                     |

**Häufigkeit Nutzung eines Flugzeuges**

|                          | Häufigkeit | Gültige Prozente | Kumulierte Prozente |
|--------------------------|------------|------------------|---------------------|
| Mehrmals pro Woche       | 3          | ,3               | ,3                  |
| Mehrmals pro Monat       | 11         | 1,1              | 1,4                 |
| Gültig Mehrmals pro Jahr | 310        | 30,1             | 31,4                |
| Alle paar Jahre          | 521        | 50,5             | 82,0                |
| Nie                      | 186        | 18,0             | 100,0               |
| Gesamt                   | 1031       | 100,0            |                     |

**Einschätzung des Ausmaßes negativer Auswirkungen von Lärm auf die Gesundheit**

|                   | Häufigkeit | Gültige Prozente | Kumulierte Prozente |
|-------------------|------------|------------------|---------------------|
| Sehr wenig        | 59         | 5,7              | 5,7                 |
| Eher wenig        | 158        | 15,3             | 21,0                |
| Gültig Eher stark | 438        | 42,5             | 63,5                |
| Sehr stark        | 343        | 33,3             | 96,8                |
| Weiß nicht/ k.A.  | 33         | 3,2              | 100,0               |
| Gesamt            | 1031       | 100,0            |                     |

**Bekanntheitsgrad Umgebungslärmkarten**

|                                | Häufigkeit | Gültige Prozente | Kumulierte Prozente |
|--------------------------------|------------|------------------|---------------------|
| Ja, kenne ich                  | 221        | 21,4             | 21,4                |
| Gültig Nein, ist mir unbekannt | 810        | 78,6             | 100,0               |
| Gesamt                         | 1031       | 100,0            |                     |

**Lautheit Gesamtlärm in Innsbruck im Vergleich zu anderen Städten Österreichs**

|        |                     | Häufigkeit | Gültige Prozente | Kumulierte Prozente |
|--------|---------------------|------------|------------------|---------------------|
| Gültig | Viel ruhiger        | 31         | 3,0              | 3,0                 |
|        | Ruhiger             | 261        | 25,3             | 28,3                |
|        | Gleich ruhig / laut | 551        | 53,4             | 81,8                |
|        | Lauter              | 150        | 14,5             | 96,3                |
|        | Viel lauter         | 24         | 2,3              | 98,6                |
|        | Weiß nicht/ k.A.    | 14         | 1,4              | 100,0               |
|        | Gesamt              | 1031       | 100,0            |                     |

**Einschätzung eigener Beitrag zur Gesamtlärmbelastung in Innsbruck**

|        |                  | Häufigkeit | Gültige Prozente | Kumulierte Prozente |
|--------|------------------|------------|------------------|---------------------|
| Gültig | Sehr gering      | 379        | 36,8             | 36,8                |
|        | Gering           | 396        | 38,4             | 75,2                |
|        | Durchschnittlich | 227        | 22,0             | 97,2                |
|        | Stark            | 23         | 2,2              | 99,4                |
|        | Sehr stark       | 6          | ,6               | 100,0               |
|        | Gesamt           | 1031       | 100,0            |                     |

**Einschätzung störendste Lärmquelle für die Innsbruckerinnen und Innsbrucker insgesamt**

|        |                                    | Häufigkeit | Gültige Prozente | Kumulierte Prozente |
|--------|------------------------------------|------------|------------------|---------------------|
| Gültig | Straßenverkehrslärm                | 397        | 38,5             | 38,5                |
|        | Schienenverkehrslärm               | 16         | 1,6              | 40,1                |
|        | Fluglärm                           | 239        | 23,2             | 63,2                |
|        | Lärm von Gewerbe und Industrie     | 3          | ,3               | 63,5                |
|        | Lärm von Passanten und Gaststätten | 52         | 5,0              | 68,6                |
|        | Baustellenlärm                     | 223        | 21,6             | 90,2                |
|        | Nachbarschaftslärm                 | 37         | 3,6              | 93,8                |
|        | Weiß nicht/ k.A.                   | 64         | 6,2              | 100,0               |
|        | Gesamt                             | 1031       | 100,0            |                     |

**Notwendigkeit (weiterer) Maßnahmen zur Lärmreduktion in Innsbruck**

|        |                  | Häufigkeit | Gültige Prozente | Kumulierte Prozente |
|--------|------------------|------------|------------------|---------------------|
| Gültig | Ja               | 691        | 67,0             | 67,0                |
|        | Nein             | 192        | 18,6             | 85,6                |
|        | Weiß nicht/ k.A. | 148        | 14,4             | 100,0               |
|        | Gesamt           | 1031       | 100,0            |                     |

**Subkategorie: Förderung lärmarmer Verkehrsmittel, Maschinen usw.**

|         |                  | Häufigkeit | Gültige Prozente | Kumulierte Prozente |
|---------|------------------|------------|------------------|---------------------|
| Gültig  | Ja               | 600        | 86,8             | 86,8                |
|         | Nein             | 81         | 11,7             | 98,6                |
|         | Weiß nicht/ k.A. | 10         | 1,4              | 100,0               |
|         | Gesamt           | 691        | 100,0            |                     |
| Fehlend | System           | 340        |                  |                     |
| Gesamt  |                  | 1031       |                  |                     |

**Subkategorie: Strengere Vorschriften und Auflagen für Lärmverursacher**

|         |                  | Häufigkeit | Gültige Prozente | Kumulierte Prozente |
|---------|------------------|------------|------------------|---------------------|
| Gültig  | Ja               | 514        | 74,4             | 74,4                |
|         | Nein             | 170        | 24,6             | 99,0                |
|         | Weiß nicht/ k.A. | 7          | 1,0              | 100,0               |
|         | Gesamt           | 691        | 100,0            |                     |
| Fehlend | System           | 340        |                  |                     |
| Gesamt  |                  | 1031       |                  |                     |

**Subkategorie: Förderung von Lärmschutzmaßnahmen**

|         |                  | Häufigkeit | Gültige Prozente | Kumulierte Prozente |
|---------|------------------|------------|------------------|---------------------|
| Gültig  | Ja               | 581        | 84,1             | 84,1                |
|         | Nein             | 97         | 14,0             | 98,1                |
|         | Weiß nicht/ k.A. | 13         | 1,9              | 100,0               |
|         | Gesamt           | 691        | 100,0            |                     |
| Fehlend | System           | 340        |                  |                     |
| Gesamt  |                  | 1031       |                  |                     |

**Subkategorie: Strengere Kontrollen der Einhaltung von Lärmgrenzwerten**

|         |                  | Häufigkeit | Gültige Prozente | Kumulierte Prozente |
|---------|------------------|------------|------------------|---------------------|
| Gültig  | Ja               | 539        | 78,0             | 78,0                |
|         | Nein             | 135        | 19,5             | 97,5                |
|         | Weiß nicht/ k.A. | 17         | 2,5              | 100,0               |
|         | Gesamt           | 691        | 100,0            |                     |
| Fehlend | System           | 340        |                  |                     |
| Gesamt  |                  | 1031       |                  |                     |

**Subkategorie: Bewusstseinsbildung zur Lärmvermeidung**

|         |                  | Häufigkeit | Gültige Prozente | Kumulierte Prozente |
|---------|------------------|------------|------------------|---------------------|
| Gültig  | Ja               | 575        | 83,2             | 83,2                |
|         | Nein             | 107        | 15,5             | 98,7                |
|         | Weiß nicht/ k.A. | 9          | 1,3              | 100,0               |
|         | Gesamt           | 691        | 100,0            |                     |
| Fehlend | System           | 340        |                  |                     |
| Gesamt  |                  | 1031       |                  |                     |

**Subkategorie: Verkehrsbeschränkungen**

|         |                  | Häufigkeit | Gültige Prozente | Kumulierte Prozente |
|---------|------------------|------------|------------------|---------------------|
| Gültig  | Ja               | 371        | 53,7             | 53,7                |
|         | Nein             | 303        | 43,8             | 97,5                |
|         | Weiß nicht/ k.A. | 17         | 2,5              | 100,0               |
|         | Gesamt           | 691        | 100,0            |                     |
| Fehlend | System           | 340        |                  |                     |
| Gesamt  |                  | 1031       |                  |                     |

**Subkategorie: Finanzielle Auflagen für Lärmverursacher**

|         |                  | Häufigkeit | Gültige Prozente | Kumulierte Prozente |
|---------|------------------|------------|------------------|---------------------|
| Gültig  | Ja               | 402        | 58,2             | 58,2                |
|         | Nein             | 277        | 40,1             | 98,3                |
|         | Weiß nicht/ k.A. | 12         | 1,7              | 100,0               |
|         | Gesamt           | 691        | 100,0            |                     |
| Fehlend | System           | 340        |                  |                     |
| Gesamt  |                  | 1031       |                  |                     |

**Subkategorie: Schaffung, Schutz und Erhalt lärmarmer Bereiche**

|         |                  | Häufigkeit | Gültige Prozente | Kumulierte Prozente |
|---------|------------------|------------|------------------|---------------------|
| Gültig  | Ja               | 611        | 88,4             | 88,4                |
|         | Nein             | 65         | 9,4              | 97,8                |
|         | Weiß nicht/ k.A. | 15         | 2,2              | 100,0               |
|         | Gesamt           | 691        | 100,0            |                     |
| Fehlend | System           | 340        |                  |                     |
| Gesamt  |                  | 1031       |                  |                     |



**Subkategorie: Andere Maßnahmen**

|         |                  | Häufigkeit | Gültige Prozente | Kumulierte Prozente |
|---------|------------------|------------|------------------|---------------------|
| Gültig  | Ja               | 333        | 48,2             | 48,2                |
|         | Nein             | 319        | 46,2             | 94,4                |
|         | Weiß nicht/ k.A. | 39         | 5,6              | 100,0               |
|         | Gesamt           | 691        | 100,0            |                     |
| Fehlend | System           | 340        |                  |                     |
| Gesamt  |                  | 1031       |                  |                     |

**Abweichungsvariable für Geschlechterverteilung <0,5%**

|        |                                  | Häufigkeit | Gültige Prozente | Kumulierte Prozente |
|--------|----------------------------------|------------|------------------|---------------------|
| Gültig | Nicht berücksichtigte Fragebögen | 17         | 1,6              | 1,6                 |
|        | Berücksichtigte Gesamtheit       | 1014       | 98,4             | 100,0               |
|        | Gesamt                           | 1031       | 100,0            |                     |

## Impressum

Medieninhaber: Dipl.-HTL-Ing. Mag. Christoph Lechner (Amt der Tiroler Landesregierung,  
Abteilung Emissionen Sicherheitstechnik Anlagen)  
Mag. Dr. David Schnaiter

Herausgeber: Amt der Tiroler Landesregierung, Eduard-Wallnöfer-Platz 3,  
6020 Innsbruck, Tel.: +43 512 508, Mail: [post@tirol.gv.at](mailto:post@tirol.gv.at)  
DVR-Nummer: 0059463

Copyright: – **Alle Rechte vorbehalten** –
